# Supplementary material
Source: PubMed Central journal article supplement (PMC2917100)
Supplement: NIHMS218369-supplement-1_si_001.pdf [file NIHMS218369-supplement-1_si_001.pdf]

Oriented Single-Crystal Nuclear Resonance Vibrational Spectroscopy of  
[Fe(TPP)(MI)(NO)]: Quantitative Assessment of the *trans* Effect of NO

**Nicolai Lehnert,\*<sup>1</sup> J. Timothy Sage,<sup>2</sup> Nathan Silvernail,<sup>3</sup> W. Robert Scheidt,\*<sup>3</sup> E. Ercan Alp,<sup>4</sup> Wolfgang Sturhahn,<sup>4</sup> Jiyong Zhao<sup>4</sup>**

<sup>1</sup> Department of Chemistry, University of Michigan, Ann Arbor, MI 48109, USA

<sup>2</sup> Department of Physics and Center for Interdisciplinary Research on Complex Systems, Northeastern University, Boston, MA 02115, USA

<sup>3</sup> Department of Chemistry and Biochemistry, 251 Nieuwland Science Hall, University of Notre Dame, Notre Dame, IN 46556, USA

<sup>4</sup> Argonne National Laboratory, APS/XFD, 431/D003, Argonne, IL 60439, USA

E-mail: [lehnertn@umich.edu](mailto:lehnertn@umich.edu), [Scheidt.1@nd.edu](mailto:Scheidt.1@nd.edu)

## Supporting Information

**ATTENTION:** CONSIDER BEFORE PRINTING.

This file contains the complete force field from the QCC-NCA simulation of [Fe(TPP)(MI)(NO)] (page S24 – S212)!

**Complete Reference 39:**

Frisch, M. J.; Trucks, G. W.; Schlegel, H. B.; Scuseria, G. E.; Robb, M. A.; Cheeseman, J. R.; Montgomery, J. A., Jr.; Vreven, T.; Kudin, K. N.; Burant, J. C.; Millam, J. M.; Iyengar, S. S.; Tomasi, J.; Barone, V.; Mennucci, B.; Cossi, M.; Scalmani, G.; Rega, N.; Petersson, G. A.; Nakatsuji, H.; Hada, M.; Ehara, M.; Toyota, K.; Fukuda, R.; Hasegawa, J.; Ishida, M.; Nakajima, T.; Honda, Y.; Kitao, O.; Nakai, H.; Klene, M.; Li, X.; Knox, J. E.; Hratchian, H. P.; Cross, J. B.; Adamo, C.; Jaramillo, J.; Gomperts, R.; Stratmann, R. E.; Yazyev, O.; Austin, A. J.; Cammi, R.; Pomelli, C.; Ochterski, J. W.; Ayala, P. Y.; Morokuma, K.; Voth, G. A.; Salvador, P.; Dannenberg, J. J.; Zakrzewski, V. G.; Dapprich, S.; Daniels, A. D.; Strain, M. C.; Farkas, O.; Malick, D. K.; Rabuck, A. D.; Raghavachari, K.; Foresman, J. B.; Ortiz, J. V.; Cui, Q.; Baboul, A. G.; Clifford, S.; Cioslowski, J.; Stefanov, B. B.; Liu, G.; Liashenko, A.; Piskorz, P.; Komaromi, I.; Martin, R. L.; Fox, D. J.; Keith, T.; Al-Laham, M. A.; Peng, C. Y.; Nanayakkara, A.; Challacombe, M.; Gill, P. M. W.; Johnson, B.; Chen, W.; Wong, M. W.; Gonzalez, C.; Pople, J. A. *Gaussian 03*, Gaussian, Inc.: Pittsburgh, PA, 2003.

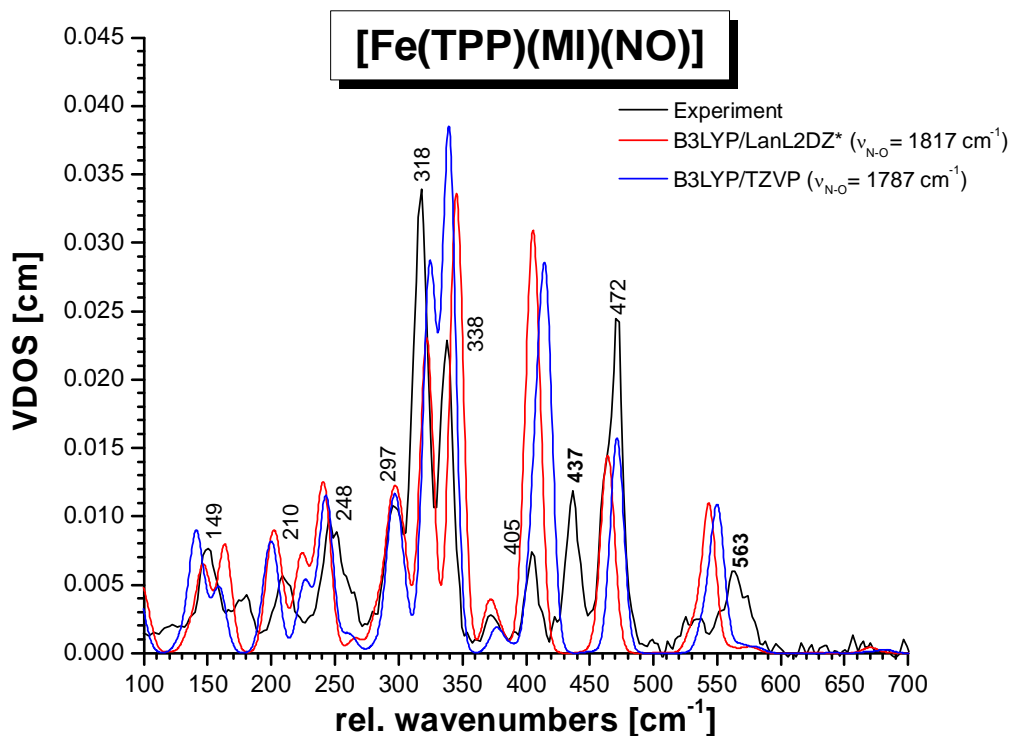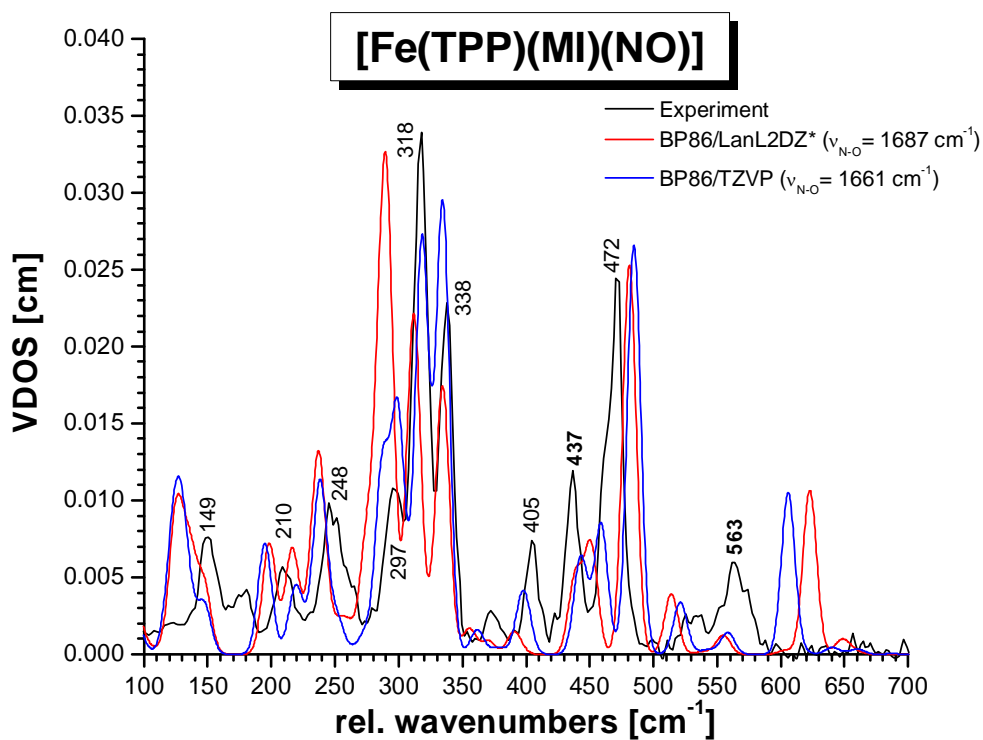

**Figure S1.** Calculated NRVS VDOS spectra of [Fe(TPP)(MI)(NO)]. Top: B3LYP/LanL2DZ\* (red) and B3LYP/TZVP (blue). Bottom: BP86/LanL2DZ\* (red) and BP86/TZVP (blue). The experimental powder spectrum of this compound is shown in black in both panels.

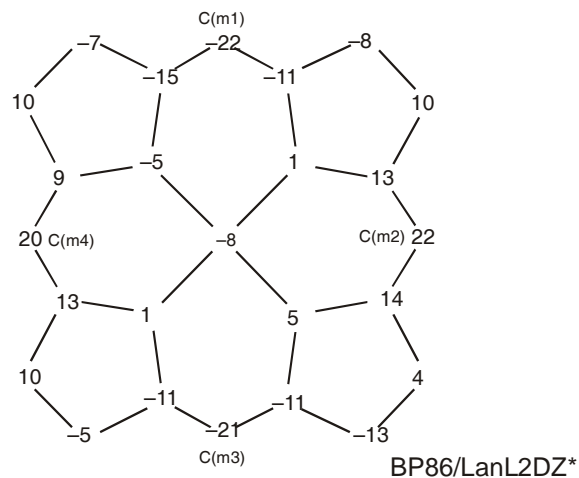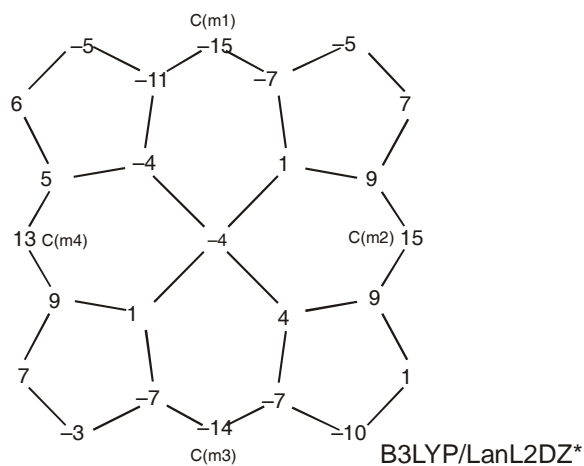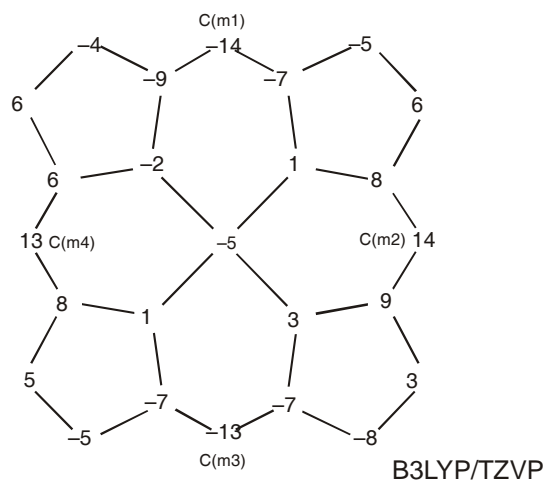

**Figure S2.** Conformation of the [Fe(TPP)] core in [Fe(TPP)(MI)(NO)], obtained from full geometry optimizations using BP86/LanL2DZ\* (top), B3LYP/LanL2DZ\* (middle), and B3LYP/TZVP (bottom). The core conformation obtained with BP86/TZVP is shown in Figure 2 in the paper. The porphyrin core diagrams indicate oop displacements of the atoms of the porphyrin ring towards the NO ligand.

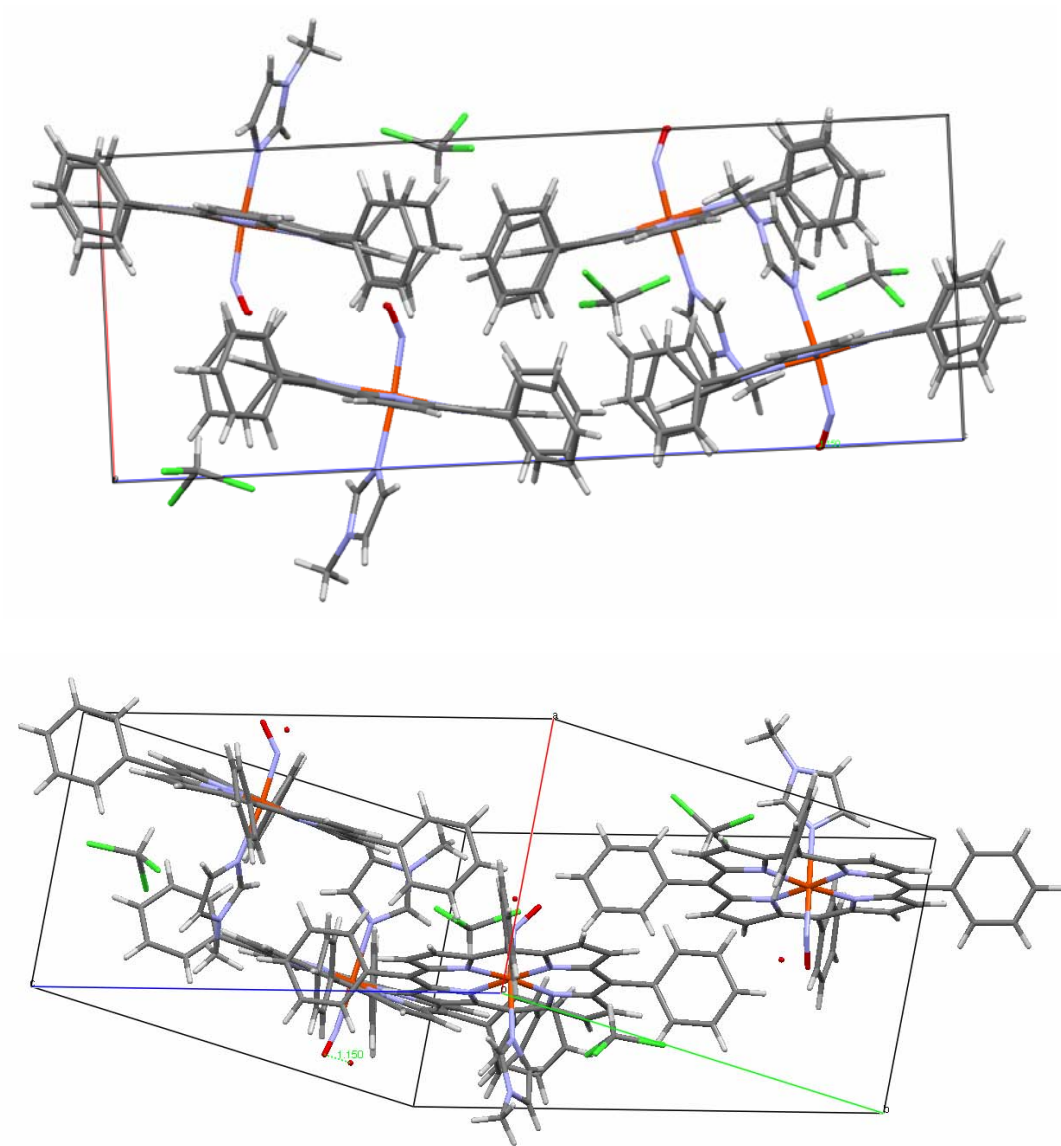

**Figure S3.** Packing of [Fe(TPP)(MI)(NO)] molecules in the single crystal. See: Wyllie, G. R. A.; Schulz, C. E.; Scheidt, W. R. *Inorg. Chem.* **2003**, *42*, 5722-5734.

**Table S1.** Complete list of force constants of complex **1** invoked in the fit of the NRVS data of this compound, based on the BP86/TZVP result.

| Force Constant                                                   | BP86/TZVP                                                                                                                                                      | QCC-NCA                                                                                                                                                        |
|------------------------------------------------------------------|----------------------------------------------------------------------------------------------------------------------------------------------------------------|----------------------------------------------------------------------------------------------------------------------------------------------------------------|
| Fe-NO [1]                                                        | 3.2408                                                                                                                                                         | 2.574 [2.55 – 2.60]                                                                                                                                            |
| N-O [2]                                                          | 12.219                                                                                                                                                         | 11.55                                                                                                                                                          |
| Fe-N-O [60]                                                      | 0.6944                                                                                                                                                         | 0.773 [0.76 – 0.78]                                                                                                                                            |
| Fe-NO/N-O                                                        | 0.7387                                                                                                                                                         | 0.336                                                                                                                                                          |
| Fe-NO/Fe-N-O                                                     | 0.3385                                                                                                                                                         | 0.399 [0.37 – 0.40]                                                                                                                                            |
| N-O/Fe-N-O                                                       | 0.3110                                                                                                                                                         | 0.403                                                                                                                                                          |
| Fe-N <sub>IM</sub> [7]                                           | 0.5635                                                                                                                                                         | 0.7835                                                                                                                                                         |
| [7]/[1]                                                          | 0.1820                                                                                                                                                         | 0.1220                                                                                                                                                         |
| [7]/[2]                                                          | 0.1139                                                                                                                                                         | 0.1139                                                                                                                                                         |
| Fe-N <sub>Pyr</sub> [3 – 6]                                      | 1.8581, 1.8561, 2.0073, 2.0320                                                                                                                                 | 1.7881, 1.7561, 2.2473, 2.2120                                                                                                                                 |
| [3]/[5], [4]/[6]                                                 | 0.2376, 0.2432                                                                                                                                                 | 0.1876, 0.1532                                                                                                                                                 |
| [3]/[4], [3]/[6], [4]/[5], [5]/[6]                               | -0.0719, -0.1100, -0.1045, -0.1123                                                                                                                             | -0.0719, -0.0800, -0.0745, -0.0723                                                                                                                             |
| ON-Fe-N <sub>Pyr</sub> [61 – 64]                                 | 0.5860, 0.5390, 0.5855, 0.6164                                                                                                                                 | 0.6460, 0.6090, 0.5855, 0.6564                                                                                                                                 |
| (Im)N-Fe-N <sub>Pyr</sub> [65 – 68]                              | 0.6397, 0.5586, 0.6894, 0.5583                                                                                                                                 | 0.5297, 0.6486, 0.4794, 0.5383                                                                                                                                 |
| [7]/C-N <sub>IM</sub> [52]                                       | 0.1245                                                                                                                                                         | 0.2245                                                                                                                                                         |
| [7]/[60]                                                         | 0.0045                                                                                                                                                         | 0.1545                                                                                                                                                         |
| [7]/[61 – 64]                                                    | -0.1762, -0.0689, -0.0435, -0.1046                                                                                                                             | -0.1262, -0.1089, -0.1235, -0.1146                                                                                                                             |
| [7]/[65 – 68]                                                    | 0.0786, 0.1244, 0.1413, 0.0488                                                                                                                                 | 0.0486, 0.1044, 0.1218, 0.0888                                                                                                                                 |
| [60]/[3 – 6]                                                     | -0.0349, -0.0359, -0.0179, -0.0157                                                                                                                             | 0.0349, 0.0359, 0.0179, 0.0157                                                                                                                                 |
| [60]/[61 – 64]                                                   | 0.0410, 0.0358, -0.0651, -0.0566                                                                                                                               | 0.0210, 0.0258, -0.0351, -0.0366                                                                                                                               |
| [60]/[65 – 68]                                                   | 0.0549, 0.0486, -0.0304, -0.0272                                                                                                                               | 0.0549, 0.0386, -0.0104, -0.0072                                                                                                                               |
| Fe-N-C <sub>IM</sub> [117]                                       | 0.7610                                                                                                                                                         | 1.2810                                                                                                                                                         |
| [7]/[117]                                                        | -0.0314                                                                                                                                                        | 0.0384                                                                                                                                                         |
| $\tau$ (Fe-NO) [162]                                             | 0.0252                                                                                                                                                         | 0.0275                                                                                                                                                         |
| $\tau$ (Fe-N <sub>IM</sub> ) [163]                               | 0.0453                                                                                                                                                         | 0.0133                                                                                                                                                         |
| [162]/[163]                                                      | 0.0003                                                                                                                                                         | 0.0041                                                                                                                                                         |
| $\delta^{\text{ip}}$ (Porphyrin) [73 – 92] <sup>a</sup>          | 2.7665, 1.3946, 1.3886, 2.7616, 2.7685, 1.3965, 1.3963, 2.7762, 2.7629, 1.3945, 1.3947, 2.7748, 2.7901, 1.3898, 1.3949, 2.7663, 1.0244, 1.0287, 1.0290, 1.0288 | 2.8665, 1.4946, 1.4886, 2.8616, 2.8685, 1.4965, 1.4963, 2.8762, 2.8629, 1.4945, 1.4947, 2.8748, 2.8901, 1.4898, 1.4949, 2.8663, 1.0245, 1.0288, 1.0290, 1.0288 |
| $\delta^{\text{ip}}$ (Porphyrin) [109 – 116]                     | 0.8332, 0.8258, 0.8140, 0.8203, 0.8058, 0.8119, 0.8301, 0.8285                                                                                                 | 1.0332, 1.0258, 1.0140, 1.0203, 1.0058, 1.0119, 1.0301, 1.0285                                                                                                 |
| $\delta^{\text{op}}$ (Porphyrin): $\gamma$ (Pyr) [134 – 153]     | 0.2291, 0.4013, 0.2567, 0.2568, 0.4082, 0.2380, 0.3971, 0.2537, 0.2525, 0.3969, 0.3337, 0.4045, 0.2241, 0.3722, 0.3436, 0.2424, 0.4007, 0.2556, 0.2557, 0.4077 | 0.2291, 0.4213, 0.2767, 0.2768, 0.4282, 0.2480, 0.4171, 0.2737, 0.2725, 0.4169, 0.3337, 0.4245, 0.2441, 0.3922, 0.3636, 0.2424, 0.4207, 0.2756, 0.2757, 0.4277 |
| $\delta^{\text{op}}$ (Porphyrin): $\gamma$ (Methine) [154 – 157] | 0.3154, 0.3006, 0.2992, 0.3086                                                                                                                                 | 0.3554, 0.3406, 0.3392, 0.3486                                                                                                                                 |
| $\tau$ (Porphyrin) [164 – 175]                                   | 0.2226, 0.2159, 0.2278, 0.2219, 0.2144, 0.2268, 0.2035, 0.4107, 0.2494, 0.2243, 0.2131, 0.2277                                                                 | 0.2826, 0.2759, 0.2878, 0.2819, 0.2744, 0.2868, 0.2635, 0.4707, 0.3094, 0.2843, 0.2731, 0.2877                                                                 |
| $\tau$ (Porphyrin): $\tau$ (Methine) [176 – 183]                 | 0.2095, 0.1983, 0.1957, 0.1700, 0.1830, 0.2048, 0.2003, 0.1912                                                                                                 | 0.3295, 0.3183, 0.3157, 0.2900, 0.3030, 0.3248, 0.3203, 0.3112                                                                                                 |
| $\delta^{\text{op}}$ (MI) [158 – 161]                            | 0.3606, 0.6281, 0.5074, 0.3383                                                                                                                                 | 0.4206, 0.7081, 0.5774, 0.3983                                                                                                                                 |
| $\tau$ (MI) [184 – 189]                                          | 0.1488, 0.9985, 0.2258, 1.0439, 0.1424, 0.0174                                                                                                                 | 0.2088, 1.4585, 0.2858, 1.5039, 0.2024, 0.1074                                                                                                                 |

<sup>a</sup> The  $\delta$ (Fe-N-C) coordinates are [73], [76], [77], [80], [81], [84], [85], [88] with values of about 2.86 – 2.90 mdyn/Å in the QCC-NCA simulation. MI = 1-methylimidazole; Pyr = pyrrole; IM = imidazole.

**Table S2.** Vibrational assignments for [Fe(TPP)(MI)(NO)] (**1**) based on the BP86/TZVP calculation but applying the force constants for the Fe-N-O unit from ref. 6c ('adjusted' BP86/TZVP; cf. Figure 3).

| Experiment                                          |                | adjusted BP86/TZVP <sup>b</sup> |                      |                |                                                                                                                                                               | Literature (Exp.) <sup>e</sup>                             |
|-----------------------------------------------------|----------------|---------------------------------|----------------------|----------------|---------------------------------------------------------------------------------------------------------------------------------------------------------------|------------------------------------------------------------|
| $\nu$ [cm <sup>-1</sup> ] ( $\Delta$ ) <sup>a</sup> | Polarization   | $\nu$ [cm <sup>-1</sup> ]       | Sym/Int <sup>c</sup> | Polarization   | Assignment <sup>d</sup>                                                                                                                                       | [Fe(TPP)(MI)(CO)]                                          |
| <b>563</b> (-12)                                    | ip/oop = 2:3   | <b>565</b>                      |                      | ip             | $\delta_{ip}(\text{Fe-N-O})$                                                                                                                                  |                                                            |
|                                                     |                | 553                             |                      |                |                                                                                                                                                               |                                                            |
|                                                     |                | 551                             |                      | ip             | 21% $\delta_{ip}(\text{Fe-N-O})$                                                                                                                              |                                                            |
| <b>530</b>                                          | ip/oop = 1:1   | 545/541                         |                      | ip             | ~10% $\delta_{ip}(\text{Fe-N-O}) + \gamma C_{\alpha} C_M + \text{Pyr.fold}$                                                                                   |                                                            |
|                                                     |                | 519/518                         | $E_u$                | ip/oop = 2:1   | $\gamma(\text{Ph}) + \delta_{ip}(\text{N-Fe-N}) + \text{Pyr.trans}$                                                                                           |                                                            |
| <b>472</b> (-3)<br>(two components)                 | ip/oop = 2:1   | <b>459</b>                      | $E_u / s$            | ip/oop = 1:1   | <b>Pyr.rot</b> + 26% $\nu(\text{Fe-NO}) + \nu(\text{Fe-N}_{\text{Pyr}})$ ( $\nu_{49}/\nu_{50}$ )                                                              | <b>471/470</b> , $E_u$ , $\nu_{49}/\nu_{53}$               |
|                                                     |                | <b>459</b>                      |                      | ip             | <b>Pyr.rot</b> + $\nu(\text{Fe-N}_{\text{Pyr}})$ ( $\nu_{49}/\nu_{50}$ )                                                                                      |                                                            |
|                                                     |                | 442                             | / w                  | oop            | <b>Pyr.rot</b> ( $\nu_{49}$ )                                                                                                                                 |                                                            |
| <b>437</b> (-8)                                     | oop            | <b>437</b>                      | / s                  | oop            | $\nu(\text{Fe-NO}) + \text{Pyr.rot}$                                                                                                                          |                                                            |
| <b>405</b>                                          | ip             | <b>400/399</b>                  | $E_u / w$            | ip             | <b>Pyr.trans</b> + $\nu(\text{Fe-N}_{\text{Pyr}})$ ( $\nu_{53}/\nu_{50}$ )                                                                                    | <b>420/410</b> , $E_u$ , $\nu_{50}/\nu_{53}$               |
|                                                     |                | 378                             | $A_{1g} / vw$        | ip/oop = 1:2.5 | $\nu(\text{Fe-N}_{\text{Pyr}})$                                                                                                                               |                                                            |
| <b>372</b>                                          | ip             | <b>362</b>                      | w                    | ip             | IM. rot                                                                                                                                                       |                                                            |
| <b>338</b> (-2)                                     | ip             | <b>335</b>                      | $E_u / vs$           | ip             | $\nu(\text{Fe-N}_{\text{Pyr}}) + \text{Pyr.rot} + \text{Pyr.tilt} + \delta_{oop}(\text{ON-Fe-N}_{\text{Pyr}}) + 20\% \tau(\text{NO})$ ( $\nu_{50}/\nu_{49}$ ) | <b>338/325</b> , $E_u$ , $\nu_{49}/\nu_{50}/\nu_{53}$      |
|                                                     |                |                                 |                      | ip/oop = 3.5:1 | $\nu(\text{Fe-N}_{\text{Pyr}}) + \text{Pyr.rot} + \text{Pyr.tilt}$ ( $\nu_{50}/\nu_{49}$ )                                                                    |                                                            |
| <b>318</b>                                          | ip/oop = 3.4:1 | <b>318</b>                      |                      | ip/oop = 3.5:1 | $\nu(\text{Fe-N}_{\text{Pyr}}) + \text{Pyr.rot} + \text{Pyr.tilt}$ ( $\nu_{50}/\nu_{49}$ )                                                                    |                                                            |
| <b>297</b>                                          | ip/oop = 5.3:1 | 301                             | / m                  | ip             | <b>Pyr.swif</b> + $\nu(\text{Fe-N}_{\text{Pyr}})$                                                                                                             |                                                            |
|                                                     |                | 299                             | $E_u / s$            | ip             | <b>Pyr.tilt</b> + $\nu(\text{Fe-N}_{\text{Pyr}}) + \text{Pyr.swif} + \text{Pyr.rot}$ ( $\nu_{50}/\nu_{49}$ )                                                  | 301                                                        |
|                                                     |                | <b>288</b>                      |                      | ip/oop = 3.9:1 | <b>Pyr.tilt</b> + $\nu(\text{Fe-N}_{\text{Pyr}}) + \text{Pyr.rot}$ ( $\nu_{50}/\nu_{49}$ )                                                                    |                                                            |
| <b>248</b>                                          | ip             | 251                             | $E_u / mw$           | ip             | $\gamma(\text{Ph}) + \delta_{oop}(\text{IM}) + \text{Pyr.tilt} + 7\% \tau(\text{NO})$                                                                         | 255/244, $E_u$ , $\nu_{42}/\nu_{50}$                       |
|                                                     |                | <b>239</b>                      |                      |                | $\gamma(\text{Ph}) + \text{Pyr.tilt} + 7\% \delta_{ip}(\text{Fe-N-O})$                                                                                        |                                                            |
|                                                     |                | 220                             | / mw                 | ip             | $\delta_{oop}(\text{IM}) + \tau(\text{IM})$                                                                                                                   |                                                            |
| <b>209</b> (-6)                                     | ip/oop = 1:1   | <b>196/195</b>                  | / m                  | ip             | 20% $\tau(\text{NO}) + \text{Pyr.tilt}$                                                                                                                       | 226, $\nu(\text{Fe-N}_{\text{IM}})$ , oop (different mode) |
|                                                     |                |                                 |                      | oop            | $\text{Pyr.tilt} + \gamma C_{\alpha} C_M + 9\% \tau(\text{NO})$                                                                                               |                                                            |
| <b>180</b>                                          | ip/oop = 1:3   | 148                             |                      | ip/oop = 1:5   | 43% $\delta_{ip}(\text{Fe-N-C}_{\text{IM}}) + \nu(\text{Fe-N}_{\text{IM}})$                                                                                   | 172, $\delta^{\text{ip}}(\text{Im})$                       |
|                                                     |                | 140                             | / w                  |                | $\delta_{oop}(\text{Fe-IM}) + \nu(\text{Fe-N}_{\text{IM}})$                                                                                                   |                                                            |
| <b>149</b>                                          | oop            | 131                             | $A_{2u} / s$         | oop            | 21% $\nu(\text{Fe-N}_{\text{IM}}) + \text{Pyr.tilt}$ ( $\gamma_9$ )                                                                                           | 124, $\gamma_9/\gamma_6$ , oop                             |
|                                                     |                | 124                             | / s                  |                | 19% $\nu(\text{Fe-N}_{\text{IM}}) + \delta_{oop}(\text{Fe-IM}) + \text{Pyr.tilt}$                                                                             |                                                            |
|                                                     |                | 118                             | $B_{2g} / s$         |                | 7% $\nu(\text{Fe-N}_{\text{IM}}) + \delta_{ip}(\text{N-Fe-N})$                                                                                                |                                                            |

<sup>a</sup> ( $\Delta$ ) = <sup>15</sup>N/<sup>18</sup>O isotope shift.

<sup>b</sup> Using BP86/TZVP plus the calculated force constants for the Fe-N-O unit from ref. 6c.

<sup>c</sup> Symmetry (Sym) and calculated intensity (Int): vs = very strong, s = strong, m = medium, mw = medium weak, w = weak, vw = very weak.

<sup>d</sup> For nomenclature see Paulat et al., *Inorg. Chem.* **2006**, *45*, 2835. Classification of porphyrin modes by Spiro:  $\nu_{42}$ :  $\delta(\text{C}_M\text{-X})$  ( $E_u$ );  $\nu_{49}$ : Pyrrole (Pyr.) in-plane (ip) rotation ( $E_u$ );  $\nu_{50}$ :  $\nu(\text{Fe-N}_{\text{Pyr}})$  ( $E_u$ );  $\nu_{53}$ : Pyr. ip translation ( $E_u$ );  $\gamma_9$ : out-of-plane (oop) doming ( $A_{2u}$ );  $\gamma_6$ : oop Pyr. tilting ( $A_{2u}$ ) [Li et al., *J. Am. Chem. Soc.* **1989**, *111*, 7012 & *J. Phys. Chem.* **1990**, *94*, 31].

<sup>e</sup> From ref.: Rai et al. *J. Am. Chem. Soc.* **2003**, *125*, 6927.

**Table S3.** Cartesian coordinates of the fully optimized structure of **1** using BP86/LanL2DZ\*.

|     |             |             |             |
|-----|-------------|-------------|-------------|
| Fe  | 0.04815200  | 0.01231400  | -0.38284900 |
| N   | -1.86326300 | -0.69106200 | -0.38292900 |
| N   | -0.67670900 | 1.91577100  | -0.32349100 |
| N   | 1.92407300  | 0.71740100  | -0.21498200 |
| N   | 0.73846200  | -1.86822100 | -0.26139300 |
| C   | -2.26821700 | -2.01077000 | -0.24555500 |
| C   | -3.71954300 | -2.09904900 | -0.26418100 |
| H   | -4.29610000 | -3.01876400 | -0.13908000 |
| C   | -4.19139400 | -0.81907000 | -0.45119700 |
| H   | -5.23011600 | -0.48389700 | -0.50718100 |
| C   | -3.02691700 | 0.05088700  | -0.51838000 |
| C   | -3.11399400 | 1.45982700  | -0.60353600 |
| C   | -4.47107600 | 2.06880400  | -0.80274000 |
| C   | -1.99559300 | 2.31399100  | -0.47539100 |
| C   | -2.09261500 | 3.76636200  | -0.44958700 |
| H   | -3.01541800 | 4.33856100  | -0.57037700 |
| C   | -0.81936300 | 4.24395400  | -0.24438200 |
| H   | -0.49681900 | 5.28331600  | -0.14754600 |
| C   | 0.05771800  | 3.08381600  | -0.19438400 |
| C   | 1.46176600  | 3.17088500  | -0.07077600 |
| C   | 2.09191700  | 4.52530900  | 0.07426000  |
| C   | 2.31509200  | 2.04657400  | -0.12877800 |
| C   | 3.76349700  | 2.15090000  | -0.19540400 |
| H   | 4.32614100  | 3.08721600  | -0.16823600 |
| C   | 4.24847700  | 0.87218300  | -0.34932200 |
| H   | 5.28687200  | 0.55399000  | -0.46869100 |
| C   | 3.09741500  | -0.01485900 | -0.34390900 |
| C   | 3.18775400  | -1.42097400 | -0.43441000 |
| C   | 4.53918000  | -2.05031400 | -0.60258200 |
| C   | 2.06198000  | -2.27067900 | -0.35399800 |
| C   | 2.15612600  | -3.71996600 | -0.29066700 |
| H   | 3.08697400  | -4.29091100 | -0.33009800 |
| C   | 0.87183100  | -4.19406100 | -0.15627000 |
| H   | 0.53951100  | -5.23265400 | -0.08766400 |
| C   | -0.00569400 | -3.03413300 | -0.15156200 |
| C   | -1.41440900 | -3.12804800 | -0.10801300 |
| C   | -2.03023200 | -4.48736200 | 0.04877100  |
| N   | 0.20981400  | -0.03529400 | -2.09119400 |
| O   | 0.97501500  | -0.42273200 | -2.92210300 |
| N   | -0.05376100 | -0.00255600 | 1.80972800  |
| C   | 0.99825800  | -0.05730100 | 2.70679800  |
| C   | 0.50547900  | -0.05183700 | 4.00566900  |
| N   | -0.87941600 | 0.00778500  | 3.88517400  |
| C   | -1.16773700 | 0.03554700  | 2.54501500  |
| H   | 2.03402900  | -0.09379200 | 2.36463800  |
| H   | 1.00212400  | -0.08560400 | 4.97728200  |
| C   | -1.84746200 | 0.04320100  | 4.97903700  |
| H   | -2.86668300 | 0.05253300  | 4.55695500  |
| H   | -1.74068000 | -0.84995500 | 5.62197100  |
| H   | -1.70973400 | 0.95207900  | 5.59380100  |
| H   | -2.18527600 | 0.07861800  | 2.15201300  |
| C12 | -5.08551100 | 2.85114200  | 0.20731300  |
| H12 | -4.55708300 | 3.00991800  | 1.15818000  |



|     |             |             |             |
|-----|-------------|-------------|-------------|
| C12 | -6.36474200 | 3.41171500  | 0.01119100  |
| H12 | -6.82527400 | 4.01035800  | 0.80994400  |
| C12 | -7.05284000 | 3.20317800  | -1.20354500 |
| H12 | -8.04861400 | 3.64173800  | -1.35896900 |
| C12 | -6.45104500 | 2.42644000  | -2.21693100 |
| H12 | -6.97497100 | 2.26098900  | -3.16897200 |
| C12 | -5.17436700 | 1.86195800  | -2.01615900 |
| H12 | -4.70518900 | 1.26401600  | -2.81021400 |
| C20 | 2.05637300  | 5.46749200  | -0.98410700 |
| H20 | 1.56528500  | 5.19399300  | -1.92865100 |
| C20 | 2.66114500  | 6.73379700  | -0.84370100 |
| H20 | 2.63002800  | 7.44666800  | -1.67984600 |
| C20 | 3.30930900  | 7.08314300  | 0.36073000  |
| H20 | 3.77913400  | 8.07068400  | 0.47092600  |
| C20 | 3.35140000  | 6.15248400  | 1.42117600  |
| H20 | 3.85173300  | 6.41371500  | 2.36450200  |
| C20 | 2.75109300  | 4.88434200  | 1.27651400  |
| H20 | 2.78117900  | 4.16238100  | 2.10500900  |
| C28 | 4.86349100  | -2.72887300 | -1.80418300 |
| H28 | 4.11808600  | -2.77128400 | -2.61072200 |
| C28 | 6.12850900  | -3.32806000 | -1.97581300 |
| H28 | 6.36275600  | -3.84253000 | -2.91849500 |
| C28 | 7.09106900  | -3.26506200 | -0.94521400 |
| H28 | 8.07645000  | -3.73367300 | -1.07762300 |
| C28 | 6.77761400  | -2.59503700 | 0.25697500  |
| H28 | 7.51685500  | -2.54477700 | 1.06902000  |
| C28 | 5.51404500  | -1.99123800 | 0.42450400  |
| H28 | 5.27106900  | -1.48031400 | 1.36705700  |
| C36 | -1.86649200 | -5.21501500 | 1.25426500  |
| H36 | -1.28969800 | -4.76578800 | 2.07524000  |
| C36 | -2.44221400 | -6.49284800 | 1.41165000  |
| H36 | -2.30845000 | -7.03778800 | 2.35697500  |
| C36 | -3.18754900 | -7.07053400 | 0.36122800  |
| H36 | -3.63378300 | -8.06778900 | 0.48141900  |
| C36 | -3.35227900 | -6.35771900 | -0.84597000 |
| H36 | -3.92318700 | -6.80061300 | -1.67433100 |
| C36 | -2.78058600 | -5.07748800 | -0.99913100 |
| H36 | -2.89958700 | -4.53151800 | -1.94566600 |

**Table S4.** Cartesian coordinates of the fully optimized structure of **1** using BP86/TZVP.

|     |             |             |             |
|-----|-------------|-------------|-------------|
| Fe  | 0.04625100  | 0.01166800  | -0.38642200 |
| N   | -1.84167000 | -0.73386100 | -0.37842600 |
| N   | -0.72164300 | 1.89129900  | -0.32231800 |
| N   | 1.90190900  | 0.75929200  | -0.21238800 |
| N   | 0.78263200  | -1.84882200 | -0.26684100 |
| C   | -2.20993200 | -2.06145900 | -0.25956600 |
| C   | -3.65135000 | -2.17986900 | -0.27912500 |
| H   | -4.20130000 | -3.11087500 | -0.17738200 |
| C   | -4.15158400 | -0.92027200 | -0.44371600 |
| H   | -5.19233800 | -0.61430800 | -0.49955700 |
| C   | -3.01931600 | -0.02078300 | -0.50230400 |
| C   | -3.13526300 | 1.37726500  | -0.57602500 |
| C   | -4.50468300 | 1.95593300  | -0.76064300 |
| C   | -2.04640100 | 2.25575000  | -0.46191600 |
| C   | -2.17030700 | 3.69868000  | -0.44064400 |
| H   | -3.10239300 | 4.24570400  | -0.54686600 |
| C   | -0.91651800 | 4.20180800  | -0.25657300 |
| H   | -0.61693400 | 5.24264300  | -0.17642800 |
| C   | -0.01371200 | 3.07136600  | -0.20547600 |
| C   | 1.37929700  | 3.18620500  | -0.08761400 |
| C   | 1.97216000  | 4.55664000  | 0.04185700  |
| C   | 2.25842100  | 2.09342100  | -0.12683100 |
| C   | 3.69817700  | 2.22366000  | -0.16637400 |
| H   | 4.23679100  | 3.16587800  | -0.12396800 |
| C   | 4.21002100  | 0.96625700  | -0.30303300 |
| H   | 5.25168400  | 0.67138400  | -0.38941000 |
| C   | 3.08798500  | 0.05454600  | -0.32174900 |
| C   | 3.20669600  | -1.34020100 | -0.40918800 |
| C   | 4.57523900  | -1.93320500 | -0.54991100 |
| C   | 2.11173200  | -2.21569600 | -0.35214500 |
| C   | 2.23414000  | -3.65598600 | -0.30121000 |
| H   | 3.17245700  | -4.20142500 | -0.34177900 |
| C   | 0.97150400  | -4.15771400 | -0.18499100 |
| H   | 0.66655300  | -5.19833200 | -0.12586500 |
| C   | 0.06678100  | -3.02835400 | -0.17380400 |
| C   | -1.33077900 | -3.14901500 | -0.13947600 |
| C   | -1.91493900 | -4.52210000 | -0.00637400 |
| N   | 0.21728000  | -0.02365200 | -2.11866300 |
| O   | 0.99039300  | -0.36813600 | -2.94901000 |
| N   | -0.05215400 | -0.00013200 | 1.81503100  |
| C   | 0.99655700  | -0.00134600 | 2.71233700  |
| C   | 0.50454300  | -0.02181200 | 3.99719700  |
| N   | -0.87677600 | -0.03434300 | 3.87623000  |
| C   | -1.16354600 | -0.02001800 | 2.54191400  |
| H   | 2.02642500  | 0.01633000  | 2.37260500  |
| H   | 0.99572100  | -0.03102900 | 4.96454900  |
| C   | -1.84424500 | -0.05092100 | 4.96764100  |
| H   | -2.85466600 | -0.09350200 | 4.54331700  |
| H   | -1.69106900 | -0.93413900 | 5.60389900  |
| H   | -1.75400900 | 0.85849400  | 5.57901500  |
| H   | -2.17558500 | -0.02879700 | 2.14907200  |
| C12 | -5.15795300 | 2.63585000  | 0.28307200  |
| H12 | -4.65419400 | 2.74238100  | 1.24667200  |
| C12 | -6.43851800 | 3.16843000  | 0.09988200  |

|     |             |             |             |
|-----|-------------|-------------|-------------|
| H12 | -6.93154900 | 3.69039700  | 0.92347000  |
| C12 | -7.08815100 | 3.02943800  | -1.13160500 |
| H12 | -8.08788800 | 3.44525700  | -1.27560600 |
| C12 | -6.44879700 | 2.35502200  | -2.17772100 |
| H12 | -6.94646100 | 2.24624300  | -3.14421500 |
| C12 | -5.16877300 | 1.82221500  | -1.99347900 |
| H12 | -4.66799700 | 1.30090700  | -2.81238200 |
| C20 | 2.02135600  | 5.42932900  | -1.05977800 |
| H20 | 1.62386100  | 5.09582200  | -2.02102800 |
| C20 | 2.58119700  | 6.70519000  | -0.93514800 |
| H20 | 2.61600500  | 7.36818700  | -1.80282700 |
| C20 | 3.10043400  | 7.12945100  | 0.29315300  |
| H20 | 3.53715800  | 8.12597300  | 0.39011500  |
| C20 | 3.05891600  | 6.26878100  | 1.39556100  |
| H20 | 3.46060000  | 6.59238700  | 2.35875100  |
| C20 | 2.49979200  | 4.99251900  | 1.27017200  |
| H20 | 2.46515400  | 4.32095800  | 2.13118300  |
| C28 | 4.98526900  | -2.48440600 | -1.77708500 |
| H28 | 4.29571100  | -2.46505900 | -2.62393300 |
| C28 | 6.25980900  | -3.04335600 | -1.91791700 |
| H28 | 6.56344300  | -3.46247400 | -2.88005700 |
| C28 | 7.14444000  | -3.06138400 | -0.83389800 |
| H28 | 8.13978500  | -3.49766400 | -0.94400800 |
| C28 | 6.74633300  | -2.51773800 | 0.39247100  |
| H28 | 7.42858300  | -2.53298100 | 1.24575000  |
| C28 | 5.47212300  | -1.95766500 | 0.53273700  |
| H28 | 5.16047300  | -1.54045400 | 1.49311000  |
| C36 | -1.82263600 | -5.22077700 | 1.21077800  |
| H36 | -1.32304700 | -4.74660100 | 2.05873400  |
| C36 | -2.36323800 | -6.50416600 | 1.34237300  |
| H36 | -2.28475000 | -7.03029200 | 2.29676000  |
| C36 | -3.00468900 | -7.11168900 | 0.25726700  |
| H36 | -3.42573700 | -8.11446400 | 0.35869400  |
| C36 | -3.10092200 | -6.42749400 | -0.95955500 |
| H36 | -3.59334900 | -6.89687000 | -1.81445400 |
| C36 | -2.56039800 | -5.14385100 | -1.09041400 |
| H36 | -2.62749000 | -4.61528500 | -2.04398700 |

**Table S5.** Cartesian coordinates of the fully optimized structure of **1** using B3LYP/LanL2DZ\*.

|     |             |             |             |
|-----|-------------|-------------|-------------|
| Fe  | 0.03854600  | 0.01133200  | -0.33674900 |
| N   | -1.82420200 | -0.81103800 | -0.36874600 |
| N   | -0.79727400 | 1.86928300  | -0.31496100 |
| N   | 1.88418100  | 0.83327200  | -0.22371300 |
| N   | 0.85591400  | -1.83596100 | -0.25897200 |
| C   | -2.13353900 | -2.14928100 | -0.27692700 |
| C   | -3.57314800 | -2.32911700 | -0.29555700 |
| H   | -4.08730700 | -3.27963400 | -0.21161000 |
| C   | -4.12427100 | -1.08447500 | -0.42602100 |
| H   | -5.17524200 | -0.82212300 | -0.46809400 |
| C   | -3.02214300 | -0.14073900 | -0.46827000 |
| C   | -3.19309100 | 1.25636500  | -0.52184300 |
| C   | -4.58841500 | 1.78624500  | -0.67386000 |
| C   | -2.13286700 | 2.17717300  | -0.42619200 |
| C   | -2.31483400 | 3.61845800  | -0.41489400 |
| H   | -3.26499900 | 4.13178600  | -0.50572800 |
| C   | -1.07363800 | 4.17045000  | -0.27250400 |
| H   | -0.81451900 | 5.22108600  | -0.21189300 |
| C   | -0.12918000 | 3.06821400  | -0.23018600 |
| C   | 1.26441300  | 3.23848400  | -0.14431500 |
| C   | 1.80756500  | 4.63444500  | -0.05189500 |
| C   | 2.18569800  | 2.17564600  | -0.17610500 |
| C   | 3.62340600  | 2.36416400  | -0.22785100 |
| H   | 4.12848600  | 3.32323000  | -0.22239000 |
| C   | 4.18195100  | 1.12045000  | -0.32346700 |
| H   | 5.23204600  | 0.86573900  | -0.40820600 |
| C   | 3.08751800  | 0.16825800  | -0.30839900 |
| C   | 3.26008400  | -1.22681200 | -0.36130700 |
| C   | 4.65367300  | -1.76990900 | -0.47696000 |
| C   | 2.19499200  | -2.14511300 | -0.30879000 |
| C   | 2.37654200  | -3.58421300 | -0.25810300 |
| H   | 3.33225200  | -4.09538600 | -0.27415900 |
| C   | 1.12927200  | -4.13542900 | -0.17735900 |
| H   | 0.86635200  | -5.18586800 | -0.13101100 |
| C   | 0.18335100  | -3.03418600 | -0.18639800 |
| C   | -1.21262400 | -3.20823800 | -0.17250100 |
| C   | -1.74787300 | -4.60632700 | -0.07108400 |
| N   | 0.16541800  | -0.00829100 | -2.10856400 |
| O   | 0.92047700  | -0.32043200 | -2.94989600 |
| N   | -0.04021000 | -0.00128300 | 1.78904300  |
| C   | 1.01766800  | -0.01969500 | 2.67169700  |
| C   | 0.53873900  | -0.02719200 | 3.96479400  |
| N   | -0.84175900 | -0.01422200 | 3.85743000  |
| C   | -1.13939300 | 0.00143500  | 2.52931700  |
| H   | 2.04310600  | -0.02293200 | 2.32573200  |
| H   | 1.04414900  | -0.04227100 | 4.92273100  |
| C   | -1.79785300 | -0.01054300 | 4.95537500  |
| H   | -2.81323800 | -0.03559800 | 4.54611400  |
| H   | -1.65596900 | -0.89229800 | 5.59308200  |
| H   | -1.68593400 | 0.89589200  | 5.56417000  |
| H   | -2.15267900 | 0.00989000  | 2.14801800  |
| C12 | -5.23225300 | 2.46699400  | 0.37857700  |
| H12 | -4.70485100 | 2.61028800  | 1.32234200  |

|     |             |             |             |
|-----|-------------|-------------|-------------|
| C12 | -6.54000000 | 2.95377900  | 0.22966000  |
| H12 | -7.02107100 | 3.47379500  | 1.05903300  |
| C12 | -7.22761600 | 2.77156700  | -0.98077100 |
| H12 | -8.24316100 | 3.15097500  | -1.09924400 |
| C12 | -6.59547700 | 2.09717600  | -2.03763800 |
| H12 | -7.11730900 | 1.95355600  | -2.98449400 |
| C12 | -5.28993000 | 1.60705300  | -1.88289500 |
| H12 | -4.80195600 | 1.08842800  | -2.70865500 |
| C20 | 1.75762600  | 5.50774100  | -1.15628800 |
| H20 | 1.32147700  | 5.15796600  | -2.09247700 |
| C20 | 2.27327600  | 6.80975900  | -1.06705700 |
| H20 | 2.23090600  | 7.46796500  | -1.93567700 |
| C20 | 2.84439400  | 7.26332900  | 0.13286400  |
| H20 | 3.24337500  | 8.27585400  | 0.20364500  |
| C20 | 2.89886900  | 6.40158300  | 1.23998800  |
| H20 | 3.33880000  | 6.74303500  | 2.17781200  |
| C20 | 2.38725200  | 5.09820800  | 1.14531100  |
| H20 | 2.42983100  | 4.43221800  | 2.00783200  |
| C28 | 5.07961300  | -2.38344900 | -1.67187500 |
| H28 | 4.38667900  | -2.44962100 | -2.51113800 |
| C28 | 6.38042700  | -2.89495200 | -1.79392400 |
| H28 | 6.69194200  | -3.36013700 | -2.72986500 |
| C28 | 7.27839500  | -2.80662200 | -0.71811800 |
| H28 | 8.28927400  | -3.20520400 | -0.81104200 |
| C28 | 6.86369900  | -2.20037700 | 0.47842300  |
| H28 | 7.55082500  | -2.12982300 | 1.32253400  |
| C28 | 5.56372300  | -1.68472600 | 0.59497700  |
| H28 | 5.24638400  | -1.21996600 | 1.52909300  |
| C36 | -1.62831900 | -5.33459100 | 1.12906100  |
| H36 | -1.14627200 | -4.86755200 | 1.98858600  |
| C36 | -2.12608200 | -6.64271600 | 1.23072700  |
| H36 | -2.02722000 | -7.18731500 | 2.17057600  |
| C36 | -2.74853200 | -7.24917700 | 0.12793400  |
| H36 | -3.13298500 | -8.26690100 | 0.20399600  |
| C36 | -2.86951400 | -6.53434600 | -1.07451200 |
| H36 | -3.34534300 | -6.99663800 | -1.94018800 |
| C36 | -2.37519000 | -5.22452600 | -1.17079300 |
| H36 | -2.46452800 | -4.67727500 | -2.10968600 |

**Table S6.** Cartesian coordinates of the fully optimized structure of **1** using B3LYP/TZVP.

|     |             |             |             |
|-----|-------------|-------------|-------------|
| Fe  | 0.03753600  | 0.01188200  | -0.34468500 |
| N   | -1.83074900 | -0.78382300 | -0.35458100 |
| N   | -0.77311100 | 1.87414700  | -0.31044400 |
| N   | 1.88765500  | 0.80865500  | -0.22731000 |
| N   | 0.83026400  | -1.84043900 | -0.26414900 |
| C   | -2.15237200 | -2.11463600 | -0.27497600 |
| C   | -3.58662800 | -2.27132100 | -0.30147500 |
| H   | -4.10959900 | -3.21055700 | -0.23603700 |
| C   | -4.11827600 | -1.03060900 | -0.42227100 |
| H   | -5.15963800 | -0.76011200 | -0.47240400 |
| C   | -3.01508700 | -0.10001000 | -0.45562700 |
| C   | -3.16215900 | 1.29046100  | -0.50969300 |
| C   | -4.54782600 | 1.83894100  | -0.66140200 |
| C   | -2.10005100 | 2.19567300  | -0.42132000 |
| C   | -2.25694400 | 3.63211900  | -0.41298300 |
| H   | -3.19450900 | 4.15489400  | -0.49864400 |
| C   | -1.01969000 | 4.16372900  | -0.27705900 |
| H   | -0.74938400 | 5.20492800  | -0.22545900 |
| C   | -0.09032600 | 3.05903400  | -0.22966400 |
| C   | 1.29678100  | 3.20576700  | -0.14523800 |
| C   | 1.85440800  | 4.59409200  | -0.05612100 |
| C   | 2.20316200  | 2.14227800  | -0.17013700 |
| C   | 3.63702500  | 2.30449900  | -0.19772900 |
| H   | 4.15353600  | 3.24916600  | -0.17012100 |
| C   | 4.17503000  | 1.06498300  | -0.29010600 |
| H   | 5.21687200  | 0.79843100  | -0.34916800 |
| C   | 3.07701400  | 0.12877800  | -0.30206900 |
| C   | 3.22616600  | -1.25932300 | -0.35707000 |
| C   | 4.61343500  | -1.81729700 | -0.45437800 |
| C   | 2.16054300  | -2.16284400 | -0.31705300 |
| C   | 2.31770000  | -3.59732000 | -0.27813700 |
| H   | 3.26018900  | -4.11800000 | -0.30283200 |
| C   | 1.07513000  | -4.12882100 | -0.20280500 |
| H   | 0.80264400  | -5.16986800 | -0.16199400 |
| C   | 0.14345700  | -3.02534100 | -0.20029200 |
| C   | -1.24597900 | -3.17531500 | -0.18513400 |
| C   | -1.79861400 | -4.56579100 | -0.10407200 |
| N   | 0.15739600  | -0.00881100 | -2.13060100 |
| O   | 0.89878200  | -0.31842200 | -2.97421200 |
| N   | -0.03342900 | -0.00079700 | 1.81049000  |
| C   | 1.02173100  | 0.01744400  | 2.69127700  |
| C   | 0.54796600  | -0.00552300 | 3.97150200  |
| N   | -0.82751500 | -0.03977700 | 3.86789200  |
| C   | -1.12600800 | -0.03497100 | 2.54608100  |
| H   | 2.03943800  | 0.05010700  | 2.34619400  |
| H   | 1.04978500  | -0.00326700 | 4.92343800  |
| C   | -1.77856900 | -0.06772000 | 4.96671100  |
| H   | -2.78586200 | -0.12695600 | 4.55940800  |
| H   | -1.60481300 | -0.93909300 | 5.59901300  |
| H   | -1.69538500 | 0.83753700  | 5.56957100  |
| H   | -2.13384300 | -0.06090100 | 2.16912700  |
| C12 | -5.21695200 | 2.42721200  | 0.41556100  |
| H12 | -4.72146000 | 2.48900100  | 1.37706400  |

|     |             |             |             |
|-----|-------------|-------------|-------------|
| C12 | -6.50518300 | 2.93139100  | 0.26589200  |
| H12 | -7.00847900 | 3.38144600  | 1.11338200  |
| C12 | -7.14653100 | 2.85526400  | -0.96632900 |
| H12 | -8.14943300 | 3.24735500  | -1.08425000 |
| C12 | -6.49086000 | 2.27257700  | -2.04626800 |
| H12 | -6.98060800 | 2.21258200  | -3.01086400 |
| C12 | -5.20306100 | 1.76883800  | -1.89422600 |
| H12 | -4.69402200 | 1.31958800  | -2.73821900 |
| C20 | 1.96047700  | 5.39865400  | -1.19385200 |
| H20 | 1.63307100  | 5.00903800  | -2.15011600 |
| C20 | 2.48474700  | 6.68463200  | -1.10889700 |
| H20 | 2.56270500  | 7.29308800  | -2.00199600 |
| C20 | 2.91109400  | 7.18687400  | 0.11663500  |
| H20 | 3.31914600  | 8.18819800  | 0.18294700  |
| C20 | 2.81007400  | 6.39505500  | 1.25607900  |
| H20 | 3.13785900  | 6.77862500  | 2.21498800  |
| C20 | 2.28605700  | 5.10899400  | 1.16904900  |
| H20 | 2.20754100  | 4.49446900  | 2.05777500  |
| C28 | 5.11261300  | -2.25897600 | -1.68265000 |
| H28 | 4.48659700  | -2.18716200 | -2.56371200 |
| C28 | 6.39791400  | -2.78255900 | -1.78086600 |
| H28 | 6.76938500  | -3.11770500 | -2.74188400 |
| C28 | 7.20449600  | -2.87318500 | -0.65084100 |
| H28 | 8.20541700  | -3.28055500 | -0.72669800 |
| C28 | 6.71798400  | -2.43670700 | 0.57733800  |
| H28 | 7.33824900  | -2.50621700 | 1.46305800  |
| C28 | 5.43258400  | -1.91273200 | 0.67358200  |
| H28 | 5.05563500  | -1.57789700 | 1.63248000  |
| C36 | -1.80593900 | -5.26053700 | 1.10838900  |
| H36 | -1.40833800 | -4.78091900 | 1.99470600  |
| C36 | -2.31459600 | -6.55339000 | 1.18612200  |
| H36 | -2.31311400 | -7.07569700 | 2.13547700  |
| C36 | -2.82449300 | -7.17331700 | 0.04980200  |
| H36 | -3.21940000 | -8.18032300 | 0.10861700  |
| C36 | -2.82111900 | -6.49221100 | -1.16344600 |
| H36 | -3.21102000 | -6.96873400 | -2.05499000 |
| C36 | -2.31239700 | -5.19942500 | -1.23898100 |
| H36 | -2.30652800 | -4.67460100 | -2.18655200 |

**Table S7.** Internal coordinate definitions for [Fe(TPP)(MI)(NO)], using the atomic numbering scheme provided via the list of Cartesian coordinates above. Internal coordinate types (1 – 6) follow the general nomenclature by Schachtschneider that is commonly used in Normal Coordinate Analysis (NCA) software. The type of internal coordinate is listed first in every line, followed by the numbers of the atoms that define the coordinate. For example, ‘1 1 38’ is a stretch (type 1) between atoms 1 and 38.

|   |    |    |            |
|---|----|----|------------|
| 0 | 0  | 0  |            |
| 1 | 1  | 38 | R:Fe-N(O)  |
| 1 | 38 | 39 | R:N-O      |
| 1 | 1  | 2  | R:Fe-N2    |
| 1 | 1  | 3  | R:Fe-N3    |
| 1 | 1  | 4  | R:Fe-N4    |
| 1 | 1  | 5  | R:Fe-N5    |
| 1 | 1  | 40 | R:Fe-N(Im) |
| 1 | 2  | 6  | R:N2-C6    |
| 1 | 2  | 11 | R:N2-C11   |
| 1 | 3  | 14 | R:N3-C14   |
| 1 | 3  | 19 | R:N3-C19   |
| 1 | 4  | 22 | R:N4-C22   |
| 1 | 4  | 27 | R:N4-C27   |
| 1 | 5  | 30 | R:N5-C30   |
| 1 | 5  | 35 | R:N5-C35   |
| 1 | 6  | 7  | R:C6-C7    |
| 1 | 7  | 9  | R:C7-C9    |
| 1 | 9  | 11 | R:C9-C11   |
| 1 | 14 | 15 | R:C14-C15  |
| 1 | 15 | 17 | R:C15-C17  |
| 1 | 17 | 19 | R:C17-C19  |
| 1 | 22 | 23 | R:C22-C23  |
| 1 | 23 | 25 | R:C23-C25  |
| 1 | 25 | 27 | R:C25-C27  |
| 1 | 30 | 31 | R:C30-C31  |
| 1 | 31 | 33 | R:C31-C33  |
| 1 | 33 | 35 | R:C33-C35  |
| 1 | 11 | 12 | R:C11-M12  |
| 1 | 12 | 14 | R:M12-C14  |
| 1 | 19 | 20 | R:C19-M20  |
| 1 | 20 | 22 | R:M20-C22  |
| 1 | 27 | 28 | R:C27-M28  |
| 1 | 28 | 30 | R:M28-C30  |
| 1 | 35 | 36 | R:C35-M36  |
| 1 | 36 | 6  | R:M36-C6   |
| 1 | 7  | 8  | R:C7-H     |
| 1 | 9  | 10 | R:C9-H     |
| 1 | 15 | 16 | R:C15-H    |
| 1 | 17 | 18 | R:C17-H    |
| 1 | 23 | 24 | R:C23-H    |
| 1 | 25 | 26 | R:C25-H    |
| 1 | 31 | 32 | R:C31-H    |
| 1 | 33 | 34 | R:C33-H    |
| 1 | 12 | 13 | R:M12-C13  |
| 1 | 20 | 21 | R:M20-C21  |
| 1 | 28 | 29 | R:M28-C29  |
| 1 | 36 | 37 | R:M36-C37  |



|   |    |    |    |                |
|---|----|----|----|----------------|
| 1 | 40 | 41 |    | R:N40-C41      |
| 1 | 41 | 42 |    | R:C41-C42      |
| 1 | 42 | 43 |    | R:C42-N43      |
| 1 | 43 | 44 |    | R:N43-C44      |
| 1 | 44 | 40 |    | R:C44-N40      |
| 1 | 41 | 45 |    | R:C41-H        |
| 1 | 42 | 46 |    | R:C42-H        |
| 1 | 43 | 47 |    | R:N43-C47      |
| 1 | 44 | 51 |    | R:C44-H        |
| 1 | 47 | 48 |    | R:C47-H        |
| 1 | 47 | 49 |    | R:C47-H        |
| 1 | 47 | 50 |    | R:C47-H        |
| 2 | 1  | 38 | 39 | a:Fe-N-O       |
| 2 | 38 | 1  | 2  | a1:N(O)-Fe-N2  |
| 2 | 38 | 1  | 3  | a1:N(O)-Fe-N3  |
| 2 | 38 | 1  | 4  | a1:N(O)-Fe-N4  |
| 2 | 38 | 1  | 5  | a1:N(O)-Fe-N5  |
| 2 | 40 | 1  | 2  | a1:N(Im)-Fe-N2 |
| 2 | 40 | 1  | 3  | a1:N(Im)-Fe-N3 |
| 2 | 40 | 1  | 4  | a1:N(Im)-Fe-N4 |
| 2 | 40 | 1  | 5  | a1:N(Im)-Fe-N5 |
| 2 | 2  | 1  | 3  | a1:N2-Fe-N3    |
| 2 | 3  | 1  | 4  | a1:N3-Fe-N4    |
| 2 | 4  | 1  | 5  | a1:N4-Fe-N5    |
| 2 | 5  | 1  | 2  | a1:N5-Fe-N2    |
| 2 | 1  | 2  | 6  | a2:Fe-N2-C6    |
| 2 | 6  | 7  | 9  | a2:C6-C7-C9    |
| 2 | 7  | 9  | 11 | a2:C7-C9-C11   |
| 2 | 11 | 2  | 1  | a2:C11-N2-Fe   |
| 2 | 1  | 3  | 14 | a2:Fe-N3-C14   |
| 2 | 14 | 15 | 17 | a2:C14-C15-C17 |
| 2 | 15 | 17 | 19 | a2:C15-C17-C19 |
| 2 | 19 | 3  | 1  | a2:C19-N3-Fe   |
| 2 | 1  | 4  | 22 | a2:Fe-N4-C22   |
| 2 | 22 | 23 | 25 | a2:C22-C23-C25 |
| 2 | 23 | 25 | 27 | a2:C23-C25-C27 |
| 2 | 27 | 4  | 1  | a2:C27-N4-Fe   |
| 2 | 1  | 5  | 30 | a2:Fe-N5-C30   |
| 2 | 30 | 31 | 33 | a2:C30-C31-C33 |
| 2 | 31 | 33 | 35 | a2:C31-C33-C35 |
| 2 | 35 | 5  | 1  | a2:C35-N5-Fe   |
| 2 | 11 | 12 | 14 | a3:C11-M12-C14 |
| 2 | 19 | 20 | 22 | a3:C19-M20-C22 |
| 2 | 27 | 28 | 30 | a3:C27-M28-C30 |
| 2 | 35 | 36 | 6  | a3:C35-M36-C6  |
| 2 | 6  | 7  | 8  | a4:C6-C7-H     |
| 2 | 9  | 7  | 8  | a4:C9-C7-H     |
| 2 | 7  | 9  | 10 | a4:C7-C9-H     |
| 2 | 11 | 9  | 10 | a4:C11-C9-H    |
| 2 | 14 | 15 | 16 | a4:C14-C15-H   |
| 2 | 17 | 15 | 16 | a4:C17-C15-H   |
| 2 | 15 | 17 | 18 | a4:C15-C17-H   |
| 2 | 19 | 17 | 18 | a4:C19-C17-H   |
| 2 | 22 | 23 | 24 | a4:C22-C23-H   |
| 2 | 25 | 23 | 24 | a4:C25-C23-H   |
| 2 | 23 | 25 | 26 | a4:C23-C25-H   |
| 2 | 27 | 25 | 26 | a4:C27-C25-H   |

|   |    |    |    |    |                |
|---|----|----|----|----|----------------|
| 2 | 30 | 31 | 32 |    | a4:C30-C31-H   |
| 2 | 33 | 31 | 32 |    | a4:C33-C31-H   |
| 2 | 31 | 33 | 34 |    | a4:C31-C33-H   |
| 2 | 35 | 33 | 34 |    | a4:C35-C33-H   |
| 2 | 11 | 12 | 13 |    | a5:C11-M12-C13 |
| 2 | 14 | 12 | 13 |    | a5:C14-M12-C13 |
| 2 | 19 | 20 | 21 |    | a5:C19-M20-C21 |
| 2 | 22 | 20 | 21 |    | a5:C22-M20-C21 |
| 2 | 27 | 28 | 29 |    | a5:C27-M28-C29 |
| 2 | 30 | 28 | 29 |    | a5:C30-M28-C29 |
| 2 | 35 | 36 | 37 |    | a5:C35-M36-C37 |
| 2 | 6  | 36 | 37 |    | a5:C6-M36-C37  |
| 2 | 1  | 40 | 41 |    | a6:Fe-N40-C41  |
| 2 | 40 | 41 | 45 |    | a6:N40-C41-H   |
| 2 | 42 | 41 | 45 |    | a6:C42-C41-H   |
| 2 | 41 | 42 | 43 |    | a6:C41-C42-N43 |
| 2 | 41 | 42 | 46 |    | a6:C41-C42-H   |
| 2 | 43 | 42 | 46 |    | a6:N43-C42-H   |
| 2 | 42 | 43 | 44 |    | a6:C42-N43-C44 |
| 2 | 42 | 43 | 47 |    | a6:C42-N43-C47 |
| 2 | 44 | 43 | 47 |    | a6:C44-N43-C47 |
| 2 | 43 | 44 | 51 |    | a6:N43-C44-H   |
| 2 | 40 | 44 | 51 |    | a6:N40-C44-H   |
| 2 | 43 | 47 | 48 |    | a6:N43-C47-H   |
| 2 | 43 | 47 | 49 |    | a6:N43-C47-H   |
| 2 | 43 | 47 | 50 |    | a6:N43-C47-H   |
| 2 | 48 | 47 | 49 |    | w:H-C47-H      |
| 2 | 48 | 47 | 50 |    | w:H-C47-H      |
| 2 | 49 | 47 | 50 |    | w:H-C47-H      |
| 3 | 1  | 2  | 6  | 11 | g:Pyrr         |
| 3 | 36 | 6  | 7  | 2  | g:Pyrr         |
| 3 | 8  | 7  | 9  | 6  | g:Pyrr         |
| 3 | 10 | 9  | 11 | 7  | g:Pyrr         |
| 3 | 12 | 11 | 2  | 9  | g:Pyrr         |
| 3 | 1  | 3  | 14 | 19 | g:Pyrr         |
| 3 | 12 | 14 | 15 | 3  | g:Pyrr         |
| 3 | 16 | 15 | 17 | 14 | g:Pyrr         |
| 3 | 18 | 17 | 19 | 15 | g:Pyrr         |
| 3 | 20 | 19 | 3  | 17 | g:Pyrr         |
| 3 | 1  | 4  | 22 | 27 | g:Pyrr         |
| 3 | 20 | 22 | 23 | 4  | g:Pyrr         |
| 3 | 24 | 23 | 25 | 22 | g:Pyrr         |
| 3 | 26 | 25 | 27 | 23 | g:Pyrr         |
| 3 | 28 | 27 | 4  | 25 | g:Pyrr         |
| 3 | 1  | 5  | 30 | 35 | g:Pyrr         |
| 3 | 28 | 30 | 31 | 5  | g:Pyrr         |
| 3 | 32 | 31 | 33 | 30 | g:Pyrr         |
| 3 | 34 | 33 | 35 | 31 | g:Pyrr         |
| 3 | 36 | 35 | 5  | 33 | g:Pyrr         |
| 3 | 13 | 12 | 14 | 11 | g:Meth         |
| 3 | 21 | 20 | 22 | 19 | g:Meth         |
| 3 | 29 | 28 | 30 | 27 | g:Meth         |
| 3 | 37 | 36 | 6  | 35 | g:Meth         |
| 3 | 45 | 41 | 42 | 40 | g:Im           |
| 3 | 46 | 42 | 43 | 41 | g:Im           |
| 3 | 47 | 43 | 44 | 42 | g:Im           |
| 3 | 51 | 44 | 40 | 43 | g:Im           |

|    |    |    |    |    |             |
|----|----|----|----|----|-------------|
| 4  | 5  | 1  | 38 | 1  | t:Fe-N(O)   |
| 2  | 3  | 4  | 5  | 40 |             |
| 39 |    |    |    |    |             |
| 4  | 5  | 1  | 40 | 2  | t:Fe-N(Im)  |
| 2  | 3  | 4  | 5  | 38 |             |
| 41 | 44 |    |    |    |             |
| 4  | 2  | 6  | 7  | 2  | t:C-C(H)    |
| 2  | 36 |    |    |    |             |
| 8  | 9  |    |    |    |             |
| 4  | 2  | 7  | 9  | 2  | t:(H)C-C(H) |
| 6  | 8  |    |    |    |             |
| 10 | 11 |    |    |    |             |
| 4  | 2  | 9  | 11 | 2  | t:C(H)-C    |
| 7  | 10 |    |    |    |             |
| 2  | 12 |    |    |    |             |
| 4  | 2  | 14 | 15 | 2  | t:C-C(H)    |
| 3  | 12 |    |    |    |             |
| 16 | 17 |    |    |    |             |
| 4  | 2  | 15 | 17 | 2  | t:(H)C-C(H) |
| 14 | 16 |    |    |    |             |
| 18 | 19 |    |    |    |             |
| 4  | 2  | 17 | 19 | 2  | t:C(H)-C    |
| 15 | 18 |    |    |    |             |
| 3  | 20 |    |    |    |             |
| 4  | 2  | 4  | 22 | 2  | t:N-C       |
| 1  | 27 |    |    |    |             |
| 20 | 23 |    |    |    |             |
| 4  | 2  | 23 | 25 | 2  | t:(H)C-C(H) |
| 22 | 24 |    |    |    |             |
| 26 | 27 |    |    |    |             |
| 4  | 2  | 25 | 27 | 2  | t:C(H)-C    |
| 23 | 26 |    |    |    |             |
| 4  | 28 |    |    |    |             |
| 4  | 2  | 30 | 31 | 2  | t:C-C(H)    |
| 5  | 28 |    |    |    |             |
| 32 | 33 |    |    |    |             |
| 4  | 2  | 31 | 33 | 2  | t:(H)C-C(H) |
| 30 | 32 |    |    |    |             |
| 34 | 35 |    |    |    |             |
| 4  | 2  | 33 | 35 | 2  | t:C(H)-C    |
| 31 | 34 |    |    |    |             |
| 5  | 36 |    |    |    |             |
| 4  | 2  | 11 | 12 | 2  | t:(H)C-M(C) |
| 2  | 9  |    |    |    |             |
| 13 | 14 |    |    |    |             |
| 4  | 2  | 12 | 14 | 2  | t:(C)M-C(H) |
| 11 | 13 |    |    |    |             |
| 3  | 15 |    |    |    |             |
| 4  | 2  | 19 | 20 | 2  | t:(H)C-M(C) |
| 3  | 17 |    |    |    |             |
| 21 | 22 |    |    |    |             |
| 4  | 2  | 20 | 22 | 2  | t:(C)M-C(H) |
| 19 | 21 |    |    |    |             |
| 4  | 23 |    |    |    |             |
| 4  | 2  | 27 | 28 | 2  | t:(C)C-M(H) |
| 4  | 25 |    |    |    |             |
| 29 | 30 |    |    |    |             |

|    |    |    |    |   |             |
|----|----|----|----|---|-------------|
| 4  | 2  | 28 | 30 | 2 | t:(C)M-C(H) |
| 27 | 29 |    |    |   |             |
| 5  | 31 |    |    |   |             |
| 4  | 2  | 35 | 36 | 2 | t:(H)C-M(C) |
| 5  | 33 |    |    |   |             |
| 6  | 37 |    |    |   |             |
| 4  | 2  | 36 | 6  | 2 | t:(C)M-C(H) |
| 35 | 37 |    |    |   |             |
| 2  | 7  |    |    |   |             |
| 4  | 2  | 40 | 41 | 2 | t:Im        |
| 1  | 44 |    |    |   |             |
| 42 | 45 |    |    |   |             |
| 4  | 2  | 41 | 42 | 2 | t:Im        |
| 40 | 45 |    |    |   |             |
| 43 | 46 |    |    |   |             |
| 4  | 2  | 42 | 43 | 2 | t:Im        |
| 41 | 46 |    |    |   |             |
| 44 | 47 |    |    |   |             |
| 4  | 2  | 43 | 44 | 2 | t:Im        |
| 42 | 47 |    |    |   |             |
| 40 | 51 |    |    |   |             |
| 4  | 2  | 44 | 40 | 2 | t:Im        |
| 43 | 51 |    |    |   |             |
| 1  | 41 |    |    |   |             |
| 4  | 2  | 43 | 47 | 3 | t:Im        |
| 42 | 44 |    |    |   |             |
| 48 | 49 | 50 |    |   |             |
| 1  | 13 | 52 |    |   | R13:C-C     |
| 1  | 52 | 54 |    |   | R13:C-C     |
| 1  | 54 | 56 |    |   | R13:C-C     |
| 1  | 56 | 58 |    |   | R13:C-C     |
| 1  | 58 | 60 |    |   | R13:C-C     |
| 1  | 60 | 13 |    |   | R13:C-C     |
| 1  | 52 | 53 |    |   | R13:C-H     |
| 1  | 54 | 55 |    |   | R13:C-H     |
| 1  | 56 | 57 |    |   | R13:C-H     |
| 1  | 58 | 59 |    |   | R13:C-H     |
| 1  | 60 | 61 |    |   | R13:C-H     |
| 1  | 21 | 62 |    |   | R21:C-C     |
| 1  | 62 | 64 |    |   | R21:C-C     |
| 1  | 64 | 66 |    |   | R21:C-C     |
| 1  | 66 | 68 |    |   | R21:C-C     |
| 1  | 68 | 70 |    |   | R21:C-C     |
| 1  | 70 | 21 |    |   | R21:C-C     |
| 1  | 62 | 63 |    |   | R21:C-H     |
| 1  | 64 | 65 |    |   | R21:C-H     |
| 1  | 66 | 67 |    |   | R21:C-H     |
| 1  | 68 | 69 |    |   | R21:C-H     |
| 1  | 70 | 71 |    |   | R21:C-H     |
| 1  | 29 | 72 |    |   | R29:C-C     |
| 1  | 72 | 74 |    |   | R29:C-C     |
| 1  | 74 | 76 |    |   | R29:C-C     |
| 1  | 76 | 78 |    |   | R29:C-C     |
| 1  | 78 | 80 |    |   | R29:C-C     |
| 1  | 80 | 29 |    |   | R29:C-C     |
| 1  | 72 | 73 |    |   | R29:C-H     |
| 1  | 74 | 75 |    |   | R29:C-H     |

|   |    |    |    |            |
|---|----|----|----|------------|
| 1 | 76 | 77 |    | R29:C-H    |
| 1 | 78 | 79 |    | R29:C-H    |
| 1 | 80 | 81 |    | R29:C-H    |
| 1 | 37 | 82 |    | R37:C-C    |
| 1 | 82 | 84 |    | R37:C-C    |
| 1 | 84 | 86 |    | R37:C-C    |
| 1 | 86 | 88 |    | R37:C-C    |
| 1 | 88 | 90 |    | R37:C-C    |
| 1 | 90 | 37 |    | R37:C-C    |
| 1 | 82 | 83 |    | R37:C-H    |
| 1 | 84 | 85 |    | R37:C-H    |
| 1 | 86 | 87 |    | R37:C-H    |
| 1 | 88 | 89 |    | R37:C-H    |
| 1 | 90 | 91 |    | R37:C-H    |
| 2 | 60 | 13 | 12 | A6:C-C-M12 |
| 2 | 12 | 13 | 52 | a6:C-C-M12 |
| 2 | 13 | 52 | 53 | a6:C-C-H   |
| 2 | 53 | 52 | 54 | a6:C-C-H   |
| 2 | 52 | 54 | 55 | a6:C-C-H   |
| 2 | 55 | 54 | 56 | a6:C-C-H   |
| 2 | 54 | 56 | 57 | a6:C-C-H   |
| 2 | 57 | 56 | 58 | a6:C-C-H   |
| 2 | 56 | 58 | 59 | a6:C-C-H   |
| 2 | 59 | 58 | 60 | a6:C-C-H   |
| 2 | 58 | 60 | 61 | a6:C-C-H   |
| 2 | 61 | 60 | 13 | A6:C-C-H   |
| 2 | 70 | 21 | 20 | A6:C-C-M20 |
| 2 | 20 | 21 | 62 | a6:C-C-M20 |
| 2 | 21 | 62 | 63 | a6:C-C-H   |
| 2 | 63 | 62 | 64 | a6:C-C-H   |
| 2 | 62 | 64 | 65 | a6:C-C-H   |
| 2 | 65 | 64 | 66 | a6:C-C-H   |
| 2 | 64 | 66 | 67 | a6:C-C-H   |
| 2 | 67 | 66 | 68 | a6:C-C-H   |
| 2 | 66 | 68 | 69 | a6:C-C-H   |
| 2 | 69 | 68 | 70 | a6:C-C-H   |
| 2 | 68 | 70 | 71 | a6:C-C-H   |
| 2 | 71 | 70 | 21 | A6:C-C-H   |
| 2 | 80 | 29 | 28 | A6:C-C-M28 |
| 2 | 28 | 29 | 72 | a6:C-C-M28 |
| 2 | 29 | 72 | 73 | a6:C-C-H   |
| 2 | 73 | 72 | 74 | a6:C-C-H   |
| 2 | 72 | 74 | 75 | a6:C-C-H   |
| 2 | 75 | 74 | 76 | a6:C-C-H   |
| 2 | 74 | 76 | 77 | a6:C-C-H   |
| 2 | 77 | 76 | 78 | a6:C-C-H   |
| 2 | 76 | 78 | 79 | a6:C-C-H   |
| 2 | 79 | 78 | 80 | a6:C-C-H   |
| 2 | 78 | 80 | 81 | a6:C-C-H   |
| 2 | 81 | 80 | 29 | A6:C-C-H   |
| 2 | 90 | 37 | 36 | A6:C-C-M36 |
| 2 | 36 | 37 | 82 | a6:C-C-M36 |
| 2 | 37 | 82 | 83 | a6:C-C-H   |
| 2 | 83 | 82 | 84 | a6:C-C-H   |
| 2 | 82 | 84 | 85 | a6:C-C-H   |
| 2 | 85 | 84 | 86 | a6:C-C-H   |
| 2 | 84 | 86 | 87 | a6:C-C-H   |

|    |    |    |    |    |            |
|----|----|----|----|----|------------|
| 2  | 87 | 86 | 88 |    | a6:C-C-H   |
| 2  | 86 | 88 | 89 |    | a6:C-C-H   |
| 2  | 89 | 88 | 90 |    | a6:C-C-H   |
| 2  | 88 | 90 | 91 |    | a6:C-C-H   |
| 2  | 91 | 90 | 37 |    | A6:C-C-H   |
| 3  | 12 | 13 | 52 | 60 | g:M12-C-R2 |
| 3  | 61 | 60 | 13 | 58 | g:H-C-R2   |
| 3  | 59 | 58 | 56 | 60 | g:H-C-R2   |
| 3  | 57 | 56 | 54 | 58 | g:H-C-R2   |
| 3  | 55 | 54 | 52 | 56 | g:H-C-R2   |
| 3  | 53 | 52 | 13 | 54 | g:H-C-R2   |
| 3  | 20 | 21 | 62 | 70 | g:M20-C-R2 |
| 3  | 71 | 70 | 21 | 68 | g:H-C-R2   |
| 3  | 69 | 68 | 66 | 70 | g:H-C-R2   |
| 3  | 67 | 66 | 64 | 68 | g:H-C-R2   |
| 3  | 65 | 64 | 62 | 66 | g:H-C-R2   |
| 3  | 63 | 62 | 21 | 64 | g:H-C-R2   |
| 3  | 28 | 29 | 72 | 80 | g:M28-C-R2 |
| 3  | 81 | 80 | 29 | 78 | g:H-C-R2   |
| 3  | 79 | 78 | 76 | 80 | g:H-C-R2   |
| 3  | 77 | 76 | 74 | 78 | g:H-C-R2   |
| 3  | 75 | 74 | 72 | 76 | g:H-C-R2   |
| 3  | 73 | 72 | 29 | 74 | g:H-C-R2   |
| 3  | 36 | 37 | 82 | 90 | g:M36-C-R2 |
| 3  | 91 | 90 | 37 | 88 | g:H-C-R2   |
| 3  | 89 | 88 | 86 | 90 | g:H-C-R2   |
| 3  | 87 | 86 | 84 | 88 | g:H-C-R2   |
| 3  | 85 | 84 | 82 | 86 | g:H-C-R2   |
| 3  | 83 | 82 | 37 | 84 | g:H-C-R2   |
| 4  | 2  | 12 | 13 | 2  | t:M12-C13  |
| 11 | 14 |    |    |    |            |
| 52 | 60 |    |    |    |            |
| 4  | 2  | 13 | 52 | 2  | t:C-C      |
| 12 | 60 |    |    |    |            |
| 53 | 54 |    |    |    |            |
| 4  | 2  | 52 | 54 | 2  | t:C-C      |
| 13 | 53 |    |    |    |            |
| 55 | 56 |    |    |    |            |
| 4  | 2  | 54 | 56 | 2  | t:C-C      |
| 52 | 55 |    |    |    |            |
| 57 | 58 |    |    |    |            |
| 4  | 2  | 56 | 58 | 2  | t:C-C      |
| 54 | 57 |    |    |    |            |
| 59 | 60 |    |    |    |            |
| 4  | 2  | 58 | 60 | 2  | t:C-C      |
| 56 | 59 |    |    |    |            |
| 13 | 61 |    |    |    |            |
| 4  | 2  | 60 | 13 | 2  | t:C-C      |
| 58 | 61 |    |    |    |            |
| 12 | 52 |    |    |    |            |
| 4  | 2  | 20 | 21 | 2  | t:M20-C21  |
| 19 | 22 |    |    |    |            |
| 62 | 70 |    |    |    |            |
| 4  | 2  | 21 | 62 | 2  | t:C-C      |
| 20 | 70 |    |    |    |            |
| 63 | 64 |    |    |    |            |
| 4  | 2  | 62 | 64 | 2  | t:C-C      |

|    |    |    |    |   |           |
|----|----|----|----|---|-----------|
| 21 | 63 |    |    |   |           |
| 65 | 66 |    |    |   |           |
| 4  | 2  | 64 | 66 | 2 | t:C-C     |
| 62 | 65 |    |    |   |           |
| 67 | 68 |    |    |   |           |
| 4  | 2  | 66 | 68 | 2 | t:C-C     |
| 64 | 67 |    |    |   |           |
| 69 | 70 |    |    |   |           |
| 4  | 2  | 68 | 70 | 2 | t:C-C     |
| 66 | 69 |    |    |   |           |
| 21 | 71 |    |    |   |           |
| 4  | 2  | 70 | 21 | 2 | t:C-C     |
| 68 | 71 |    |    |   |           |
| 20 | 62 |    |    |   |           |
| 4  | 2  | 28 | 29 | 2 | t:M28-C29 |
| 27 | 30 |    |    |   |           |
| 72 | 80 |    |    |   |           |
| 4  | 2  | 29 | 72 | 2 | t:C-C     |
| 28 | 80 |    |    |   |           |
| 73 | 74 |    |    |   |           |
| 4  | 2  | 72 | 74 | 2 | t:C-C     |
| 29 | 73 |    |    |   |           |
| 75 | 76 |    |    |   |           |
| 4  | 2  | 74 | 76 | 2 | t:C-C     |
| 72 | 75 |    |    |   |           |
| 77 | 78 |    |    |   |           |
| 4  | 2  | 76 | 78 | 2 | t:C-C     |
| 74 | 77 |    |    |   |           |
| 79 | 80 |    |    |   |           |
| 4  | 2  | 78 | 80 | 2 | t:C-C     |
| 76 | 79 |    |    |   |           |
| 29 | 81 |    |    |   |           |
| 4  | 2  | 80 | 29 | 2 | t:C-C     |
| 78 | 81 |    |    |   |           |
| 28 | 72 |    |    |   |           |
| 4  | 2  | 36 | 37 | 2 | t:M36-C37 |
| 6  | 35 |    |    |   |           |
| 82 | 90 |    |    |   |           |
| 4  | 2  | 37 | 82 | 2 | t:C-C     |
| 36 | 90 |    |    |   |           |
| 83 | 84 |    |    |   |           |
| 4  | 2  | 82 | 84 | 2 | t:C-C     |
| 37 | 83 |    |    |   |           |
| 85 | 86 |    |    |   |           |
| 4  | 2  | 84 | 86 | 2 | t:C-C     |
| 82 | 85 |    |    |   |           |
| 87 | 88 |    |    |   |           |
| 4  | 2  | 86 | 88 | 2 | t:C-C     |
| 84 | 87 |    |    |   |           |
| 89 | 90 |    |    |   |           |
| 4  | 2  | 88 | 90 | 2 | t:C-C     |
| 86 | 89 |    |    |   |           |
| 37 | 91 |    |    |   |           |
| 4  | 2  | 90 | 37 | 2 | t:C-C     |
| 88 | 91 |    |    |   |           |
| 36 | 82 |    |    |   |           |

**Table S8.** Complete force field for **1** in the basis of the internal coordinates listed above. The force field is based on the BP86/TZVP calculated force field, and then refined using Normal Coordinate Analysis (NCA) as described in the text.

|    | 1         | 2         | 3         | 4         | 5         | 6         | 7         | 8         | 9         | 10        | 11        | 12        |
|----|-----------|-----------|-----------|-----------|-----------|-----------|-----------|-----------|-----------|-----------|-----------|-----------|
| 1  | 2.574000  | 0.336000  | 0.104430  | 0.105107  | 0.031807  | 0.026726  | 0.121969  | -0.027058 | -0.026648 | -0.026567 | -0.029359 | -0.011982 |
| 2  | 0.336000  | 11.550000 | 0.013636  | 0.009095  | -0.003526 | -0.003892 | 0.113906  | 0.013709  | 0.012752  | 0.010957  | 0.013924  | 0.035569  |
| 3  | 0.104430  | 0.013636  | 1.788140  | -0.071851 | 0.187607  | -0.079950 | 0.026270  | 0.521845  | 0.520760  | -0.352503 | 0.037590  | 0.049122  |
| 4  | 0.105107  | 0.009095  | -0.071851 | 1.756140  | -0.074455 | 0.153219  | 0.017754  | 0.034158  | -0.346180 | 0.525178  | 0.523211  | -0.344692 |
| 5  | 0.031807  | -0.003526 | 0.187607  | -0.074455 | 2.247320  | -0.072312 | 0.035271  | 0.048905  | 0.050729  | 0.034359  | -0.350148 | 0.536379  |
| 6  | 0.026726  | -0.003892 | -0.079950 | 0.153219  | -0.072312 | 2.211960  | 0.040656  | -0.349281 | 0.029762  | 0.054832  | 0.049270  | 0.027539  |
| 7  | 0.121969  | 0.113906  | 0.026270  | 0.017754  | 0.035271  | 0.040656  | 0.783494  | 0.002872  | 0.009829  | -0.001548 | -0.001210 | -0.010019 |
| 8  | -0.027058 | 0.013709  | 0.521845  | 0.034158  | 0.048905  | -0.349281 | 0.002872  | 5.217580  | -0.387114 | 0.011275  | 0.015538  | 0.019496  |
| 9  | -0.026648 | 0.012752  | 0.520760  | -0.346180 | 0.050729  | 0.029762  | 0.009829  | -0.387114 | 5.215290  | -0.481079 | 0.014047  | -0.001796 |
| 10 | -0.026567 | 0.010957  | -0.352503 | 0.525178  | 0.034359  | 0.054832  | -0.001548 | 0.011275  | -0.481079 | 5.252910  | -0.382866 | 0.011352  |
| 11 | -0.029359 | 0.013924  | 0.037590  | 0.523211  | -0.350148 | 0.049270  | -0.001210 | 0.015538  | 0.014047  | -0.382866 | 5.252810  | -0.480632 |
| 12 | -0.011982 | 0.035569  | 0.049122  | -0.344692 | 0.536379  | 0.027539  | -0.010019 | 0.019496  | -0.001796 | 0.011352  | -0.480632 | 5.197580  |
| 13 | -0.020091 | 0.046604  | 0.048393  | 0.032502  | 0.520223  | -0.346311 | 0.003748  | -0.000657 | 0.019038  | 0.019757  | 0.011530  | -0.376065 |
| 14 | -0.020431 | 0.051997  | 0.029419  | 0.046849  | -0.338832 | 0.524389  | -0.006651 | 0.010687  | 0.018649  | 0.020456  | -0.005303 | 0.009422  |
| 15 | -0.012748 | 0.037001  | -0.344956 | 0.051107  | 0.029815  | 0.542834  | -0.012573 | -0.483026 | 0.013529  | -0.004803 | 0.021228  | 0.015346  |
| 16 | 0.002614  | 0.027374  | 0.022400  | 0.177476  | 0.009436  | -0.276116 | 0.001269  | 1.382490  | -0.022263 | 0.206492  | -0.038840 | -0.009461 |
| 17 | -0.001594 | -0.007843 | 0.204475  | 0.183000  | 0.012490  | 0.198792  | 0.011293  | 1.393680  | 1.402490  | 0.012048  | 0.060707  | 0.005827  |
| 18 | -0.000475 | 0.028295  | 0.026345  | -0.267700 | 0.011278  | 0.175171  | 0.003198  | -0.026077 | 1.374040  | -0.208595 | -0.031783 | -0.006324 |
| 19 | 0.001104  | 0.028174  | -0.274020 | 0.022141  | 0.179322  | 0.010024  | 0.007535  | -0.030332 | -0.218986 | 1.396830  | -0.044847 | 0.211547  |
| 20 | -0.003252 | -0.006592 | 0.189479  | 0.204936  | 0.199009  | 0.011115  | 0.000680  | 0.060842  | 0.017291  | 1.407220  | 1.408020  | 0.014253  |
| 21 | 0.003661  | 0.027712  | 0.185595  | 0.017198  | -0.278180 | 0.010707  | 0.007882  | -0.037413 | 0.213437  | -0.048328 | 1.396670  | -0.218886 |
| 22 | -0.008056 | 0.019589  | 0.011517  | -0.272255 | 0.038518  | 0.177155  | 0.006719  | -0.009009 | -0.007204 | -0.030274 | -0.211821 | 1.380950  |
| 23 | 0.005370  | 0.009948  | 0.012167  | 0.194924  | 0.205998  | 0.203678  | 0.000832  | 0.007329  | 0.006703  | 0.060410  | 0.011577  | 1.389910  |
| 24 | -0.008016 | 0.026431  | 0.008220  | 0.175889  | 0.025175  | -0.273709 | 0.006733  | -0.006618 | -0.010779 | -0.039032 | 0.211279  | -0.023709 |
| 25 | -0.008719 | 0.025095  | 0.177032  | 0.009260  | -0.271665 | 0.021131  | 0.010939  | 0.211030  | -0.038744 | -0.010883 | -0.006344 | -0.030261 |
| 26 | 0.004977  | 0.010326  | 0.191805  | 0.011651  | 0.195118  | 0.203947  | -0.006991 | 0.014040  | 0.058600  | 0.008256  | 0.005766  | 0.060483  |
| 27 | -0.008075 | 0.018736  | -0.272895 | 0.011277  | 0.176222  | 0.038636  | 0.012204  | -0.216766 | -0.028809 | -0.008191 | -0.008589 | -0.036411 |
| 28 | 0.023636  | 0.030066  | 0.510921  | 0.089939  | 0.076878  | 0.102398  | 0.015966  | -0.235796 | 0.995753  | -0.492725 | 0.210607  | 0.023501  |
| 29 | 0.024965  | 0.030910  | 0.081472  | 0.519908  | 0.107967  | 0.077014  | 0.015144  | 0.205157  | -0.499957 | 1.040100  | -0.259401 | -0.025202 |
| 30 | 0.021578  | 0.027384  | 0.105811  | 0.515233  | 0.106543  | 0.074929  | 0.013559  | 0.026808  | -0.024577 | -0.262330 | 1.032020  | -0.499327 |
| 31 | 0.007630  | 0.027752  | 0.076935  | 0.095160  | 0.528958  | 0.106496  | 0.017534  | -0.016073 | 0.026845  | 0.209559  | -0.503115 | 1.008260  |
| 32 | 0.002820  | 0.042103  | 0.076867  | 0.099603  | 0.518304  | 0.101124  | 0.015404  | 0.026966  | -0.018252 | 0.021429  | -0.025207 | -0.242175 |
| 33 | 0.002071  | 0.041104  | 0.098559  | 0.076773  | 0.102009  | 0.517691  | 0.015635  | -0.023667 | 0.019622  | -0.018180 | 0.027435  | 0.207870  |
| 34 | 0.006799  | 0.026728  | 0.094166  | 0.076549  | 0.106536  | 0.531191  | 0.019089  | -0.497671 | 0.204520  | 0.030092  | -0.019335 | 0.024051  |
| 35 | 0.020614  | 0.027265  | 0.516326  | 0.098960  | 0.072872  | 0.103746  | 0.014462  | 1.016150  | -0.243720 | -0.032354 | 0.027602  | -0.017401 |
| 36 | 0.000440  | 0.002604  | -0.029619 | -0.009442 | -0.004857 | 0.021448  | 0.000468  | -0.061227 | 0.009679  | -0.001339 | -0.002145 | -0.000091 |
| 37 | -0.000020 | 0.002561  | -0.027958 | 0.020165  | -0.004604 | -0.009894 | 0.000401  | 0.009685  | -0.058006 | 0.025458  | -0.001321 | -0.000813 |
| 38 | -0.000093 | 0.002538  | 0.023478  | -0.031644 | -0.010014 | -0.005344 | 0.000285  | -0.001270 | 0.029550  | -0.064299 | 0.010323  | -0.001567 |
| 39 | 0.000366  | 0.002667  | -0.009962 | -0.029480 | 0.021515  | -0.004952 | 0.000448  | -0.001746 | -0.001716 | 0.010675  | -0.062301 | 0.027267  |
| 40 | -0.000353 | 0.002570  | -0.004512 | 0.020280  | -0.027698 | -0.010401 | 0.000221  | -0.000465 | -0.000496 | -0.001496 | 0.025731  | -0.059493 |
| 41 | -0.000768 | 0.003104  | -0.004881 | -0.010141 | -0.028258 | 0.021111  | 0.000135  | -0.000736 | -0.000412 | -0.001723 | -0.001785 | 0.011393  |
| 42 | -0.000799 | 0.002857  | -0.009802 | -0.004209 | 0.019486  | -0.026635 | 0.000236  | -0.002063 | -0.001571 | -0.000366 | -0.000545 | -0.001217 |
| 43 | -0.000325 | 0.002456  | 0.021510  | -0.004812 | -0.010133 | -0.029040 | 0.000442  | 0.027215  | -0.001269 | -0.000807 | -0.000503 | -0.001650 |
| 44 | -0.000368 | 0.002664  | 0.025678  | 0.042053  | 0.017294  | 0.017050  | 0.001058  | -0.012127 | 0.007112  | 0.029114  | -0.013593 | 0.007250  |



|    |           |           |           |           |           |           |           |           |           |           |           |           |
|----|-----------|-----------|-----------|-----------|-----------|-----------|-----------|-----------|-----------|-----------|-----------|-----------|
| 45 | -0.000759 | 0.002611  | 0.016650  | 0.036782  | 0.028642  | 0.016353  | 0.000879  | 0.000198  | 0.007335  | -0.013066 | 0.022140  | 0.011557  |
| 46 | -0.002785 | 0.009822  | 0.016573  | 0.016265  | 0.036454  | 0.028008  | 0.000435  | 0.008437  | -0.000541 | -0.000230 | 0.008074  | -0.013864 |
| 47 | -0.000880 | 0.002587  | 0.037515  | 0.017160  | 0.017634  | 0.028985  | -0.000267 | 0.022497  | -0.012872 | 0.007519  | 0.000235  | -0.000234 |
| 48 | 0.025025  | 0.018874  | 0.004772  | -0.006265 | -0.001109 | 0.000676  | 0.081869  | 0.001411  | 0.007453  | 0.002978  | 0.002171  | 0.007416  |
| 49 | 0.005304  | 0.015063  | -0.003052 | 0.002797  | -0.001087 | 0.001922  | -0.054496 | -0.000809 | -0.003286 | -0.000679 | -0.000270 | -0.002313 |
| 50 | -0.037734 | -0.032787 | -0.007396 | 0.004836  | -0.003352 | -0.002337 | 0.001982  | -0.012010 | -0.018473 | -0.001403 | 0.002499  | 0.000185  |
| 51 | 0.012156  | 0.031099  | -0.004909 | 0.001619  | 0.000562  | 0.001996  | -0.072289 | -0.006397 | -0.009152 | -0.001638 | -0.002089 | 0.000265  |
| 52 | 0.021575  | 0.001127  | 0.014320  | -0.005304 | 0.000434  | -0.001358 | 0.224500  | 0.019219  | 0.028460  | 0.012580  | 0.008742  | -0.008253 |
| 53 | 0.001263  | 0.001221  | -0.000579 | 0.000135  | 0.002210  | 0.002171  | -0.023090 | -0.000502 | -0.000065 | -0.000020 | 0.000311  | 0.003240  |
| 54 | 0.001922  | 0.003742  | 0.000188  | 0.000092  | 0.000190  | 0.000297  | -0.005916 | -0.000750 | -0.001100 | -0.000256 | -0.000282 | -0.000110 |
| 55 | 0.001709  | -0.002762 | 0.001017  | 0.000866  | 0.001407  | 0.001242  | -0.005884 | 0.002901  | 0.003068  | 0.001582  | 0.001375  | 0.001004  |
| 56 | 0.001345  | 0.001297  | 0.002160  | 0.001800  | -0.000329 | -0.000504 | -0.026377 | 0.005520  | -0.003819 | 0.002529  | 0.002372  | -0.000014 |
| 57 | 0.000627  | 0.001201  | 0.000037  | 0.000053  | -0.000336 | -0.000083 | -0.001759 | -0.000007 | -0.000061 | 0.000093  | -0.000152 | -0.000507 |
| 58 | 0.000935  | 0.002616  | -0.000058 | -0.000332 | -0.000232 | 0.000179  | -0.001936 | -0.000519 | -0.000505 | -0.000618 | -0.000487 | -0.000761 |
| 59 | 0.000776  | 0.002741  | -0.000167 | 0.000108  | -0.000069 | -0.000367 | -0.001897 | -0.000629 | -0.000718 | -0.000212 | -0.000418 | -0.000802 |
| 60 | 0.399000  | 0.403000  | 0.034931  | 0.035886  | 0.017904  | 0.015741  | 0.154489  | 0.006591  | 0.004965  | 0.004867  | 0.007451  | 0.007654  |
| 61 | 0.042323  | 0.003209  | 0.053494  | -0.009549 | -0.042323 | -0.030929 | -0.126159 | -0.041981 | -0.012141 | 0.004184  | 0.014722  | -0.023383 |
| 62 | 0.030182  | 0.013138  | -0.019139 | 0.057593  | -0.020253 | -0.045888 | -0.108885 | 0.023751  | -0.011020 | -0.012763 | -0.020794 | 0.021960  |
| 63 | 0.111809  | -0.073291 | -0.071858 | 0.002623  | 0.031706  | 0.032884  | -0.123477 | 0.019152  | 0.013357  | -0.007920 | 0.003935  | 0.008892  |
| 64 | 0.119089  | -0.074402 | -0.000677 | -0.064353 | 0.043482  | 0.030617  | -0.114560 | -0.014721 | -0.011348 | 0.031399  | 0.012349  | -0.023149 |
| 65 | -0.088400 | 0.039891  | 0.046360  | 0.011277  | -0.013311 | -0.026591 | 0.048639  | -0.018469 | -0.001623 | 0.006751  | -0.008263 | -0.006509 |
| 66 | -0.094754 | 0.039968  | 0.019323  | 0.038015  | -0.040132 | -0.014950 | 0.104359  | 0.005069  | 0.013582  | -0.023945 | -0.009343 | 0.026690  |
| 67 | -0.065807 | 0.030402  | -0.027592 | -0.005037 | 0.023581  | 0.024070  | 0.121280  | 0.044942  | -0.003592 | -0.004518 | -0.011901 | 0.017419  |
| 68 | -0.054634 | 0.021627  | 0.000309  | -0.030755 | 0.016379  | 0.030011  | 0.088785  | -0.015634 | 0.007687  | 0.001422  | 0.021434  | -0.024484 |
| 69 | -0.012740 | 0.007357  | 0.005963  | 0.005885  | 0.001361  | 0.001771  | 0.013312  | -0.076511 | 0.114061  | 0.118066  | -0.083573 | -0.024699 |
| 70 | -0.006892 | -0.001730 | -0.012248 | 0.017681  | 0.001055  | 0.007057  | 0.008180  | -0.003265 | -0.021687 | -0.087196 | 0.114401  | 0.111515  |
| 71 | -0.001806 | 0.010629  | -0.002496 | -0.005706 | -0.007911 | -0.005035 | 0.009312  | -0.025636 | -0.004589 | -0.011212 | -0.025285 | -0.082157 |
| 72 | -0.006201 | -0.004245 | 0.012247  | -0.016647 | 0.004307  | -0.002628 | 0.005020  | 0.106866  | -0.086317 | -0.021501 | -0.006264 | -0.003443 |
| 73 | -0.011534 | 0.026680  | -0.023272 | 0.029981  | 0.030293  | -0.587125 | -0.018702 | 0.923753  | -0.109129 | 0.172726  | -0.026485 | 0.004053  |
| 74 | -0.000543 | -0.009582 | 0.237725  | 0.093105  | 0.005044  | -0.067408 | 0.006608  | 0.634965  | 0.374717  | 0.029395  | 0.011095  | 0.000577  |
| 75 | -0.001762 | -0.008254 | 0.237483  | -0.074636 | 0.005743  | 0.102596  | 0.005056  | 0.377801  | 0.624581  | -0.130902 | 0.017472  | -0.000688 |
| 76 | -0.035296 | 0.018586  | -0.029240 | -0.548639 | 0.024977  | 0.017776  | -0.003416 | -0.120203 | 0.922533  | -0.468810 | -0.040848 | 0.011661  |
| 77 | -0.033497 | 0.015188  | -0.560107 | -0.029996 | 0.020345  | 0.028541  | -0.004939 | -0.046313 | -0.466109 | 0.934607  | -0.122616 | 0.179585  |
| 78 | -0.002354 | -0.007445 | -0.078023 | 0.243130  | 0.102788  | 0.005516  | 0.002126  | 0.018473  | -0.137804 | 0.646015  | 0.374679  | 0.028803  |
| 79 | -0.001230 | -0.008558 | 0.095090  | 0.240586  | -0.068159 | 0.005131  | 0.003214  | 0.011792  | 0.029509  | 0.375435  | 0.643740  | -0.136633 |
| 80 | -0.013573 | 0.025122  | 0.034212  | -0.027988 | -0.585245 | 0.032562  | -0.011828 | -0.028051 | 0.179683  | -0.127680 | 0.935729  | -0.465741 |
| 81 | -0.027744 | 0.025165  | 0.030554  | -0.563215 | -0.015748 | 0.007646  | -0.009432 | 0.003291  | 0.010280  | -0.038591 | -0.466162 | 0.938591  |
| 82 | 0.005926  | 0.000158  | 0.004070  | -0.068676 | 0.240948  | 0.107435  | 0.002115  | 0.000710  | -0.000696 | 0.017574  | -0.132935 | 0.620824  |
| 83 | 0.005226  | -0.002602 | 0.003675  | 0.100604  | 0.235079  | -0.062317 | 0.000526  | -0.000823 | 0.000942  | 0.010819  | 0.030515  | 0.362619  |
| 84 | -0.024542 | 0.033435  | 0.027180  | 0.017490  | -0.021974 | -0.588577 | -0.003800 | 0.010059  | 0.004127  | -0.025638 | 0.174133  | -0.102146 |
| 85 | -0.025912 | 0.036747  | 0.021883  | 0.031061  | -0.575083 | -0.016783 | -0.004390 | 0.175135  | -0.024971 | 0.004014  | 0.011083  | -0.048800 |
| 86 | 0.004574  | -0.001586 | 0.096752  | 0.002444  | -0.064477 | 0.234797  | -0.001890 | 0.028327  | 0.011560  | 0.000081  | -0.001249 | 0.018588  |
| 87 | 0.005344  | 0.001312  | -0.072684 | 0.002495  | 0.104048  | 0.241148  | -0.001197 | -0.135751 | 0.018207  | -0.001401 | 0.000186  | 0.012324  |
| 88 | -0.024478 | 0.023585  | -0.561292 | 0.033340  | 0.015161  | -0.013926 | -0.007526 | -0.465917 | -0.040896 | 0.010865  | 0.004004  | -0.027547 |
| 89 | 0.006937  | 0.019220  | -0.113233 | -0.113577 | -0.004572 | -0.005825 | 0.004858  | 0.043570  | -0.048279 | -0.040227 | 0.038242  | -0.022740 |
| 90 | 0.004188  | 0.017808  | -0.005181 | -0.115169 | -0.107855 | -0.003237 | 0.005428  | 0.001518  | -0.022656 | 0.035162  | -0.039055 | -0.042787 |
| 91 | -0.000475 | 0.017748  | -0.006098 | -0.005694 | -0.109764 | -0.113110 | 0.005908  | -0.023339 | 0.001240  | 0.000414  | -0.022827 | 0.039941  |
| 92 | 0.003035  | 0.017970  | -0.115167 | -0.005675 | -0.005532 | -0.103875 | 0.006286  | -0.043312 | 0.038032  | -0.023903 | 0.001539  | 0.002222  |
| 93 | 0.000438  | 0.007318  | -0.130734 | -0.048191 | -0.004283 | 0.019753  | -0.003297 | -0.304577 | -0.210403 | -0.011336 | -0.006976 | -0.000695 |
| 94 | 0.000087  | 0.002262  | -0.107000 | -0.044883 | -0.000754 | 0.047661  | -0.003287 | -0.330363 | -0.164409 | -0.017976 | -0.004123 | 0.000120  |

|     |           |           |           |           |           |           |           |           |           |           |           |           |
|-----|-----------|-----------|-----------|-----------|-----------|-----------|-----------|-----------|-----------|-----------|-----------|-----------|
| 95  | 0.000765  | 0.001788  | -0.107093 | 0.050633  | -0.001181 | -0.049304 | -0.002357 | -0.165404 | -0.325987 | 0.074936  | -0.008107 | 0.001042  |
| 96  | 0.000736  | 0.006474  | -0.130718 | 0.023928  | -0.004674 | -0.053426 | -0.002464 | -0.212213 | -0.299260 | 0.056660  | -0.009484 | -0.000273 |
| 97  | 0.001113  | 0.006069  | 0.025269  | -0.133189 | -0.053335 | -0.004315 | -0.000761 | -0.009873 | 0.059531  | -0.308542 | -0.210907 | -0.010935 |
| 98  | 0.001156  | 0.001399  | 0.052666  | -0.109990 | -0.049595 | -0.001198 | -0.001194 | -0.008602 | 0.078239  | -0.337490 | -0.163774 | -0.017884 |
| 99  | 0.000587  | 0.001793  | -0.046082 | -0.109339 | 0.048906  | -0.001244 | -0.002117 | -0.004539 | -0.018129 | -0.163966 | -0.337144 | 0.078250  |
| 100 | 0.000822  | 0.006738  | -0.049082 | -0.131440 | 0.019214  | -0.003961 | -0.001509 | -0.007370 | -0.011410 | -0.211500 | -0.306640 | 0.058331  |
| 101 | -0.003308 | 0.002236  | -0.003942 | 0.021521  | -0.132118 | -0.056623 | -0.000847 | -0.001037 | -0.000117 | -0.009673 | 0.058758  | -0.301068 |
| 102 | -0.002580 | -0.002251 | -0.000307 | 0.047394  | -0.108833 | -0.050721 | -0.001327 | 0.000262  | 0.000772  | -0.007890 | 0.074632  | -0.320296 |
| 103 | -0.002020 | -0.001278 | -0.000001 | -0.048391 | -0.106437 | 0.045719  | -0.000457 | 0.001183  | -0.000197 | -0.003873 | -0.018707 | -0.158331 |
| 104 | -0.003161 | 0.003869  | -0.003659 | -0.052161 | -0.128619 | 0.016651  | -0.000117 | -0.000348 | -0.000764 | -0.006911 | -0.011815 | -0.204214 |
| 105 | -0.002855 | 0.003201  | -0.051010 | -0.003224 | 0.019605  | -0.129544 | 0.001332  | -0.011127 | -0.007176 | -0.000636 | 0.000080  | -0.010197 |
| 106 | -0.001823 | -0.001602 | -0.045906 | 0.000763  | 0.044826  | -0.105234 | 0.000768  | -0.017508 | -0.004293 | 0.000468  | 0.001183  | -0.008460 |
| 107 | -0.002131 | -0.002843 | 0.050724  | 0.000175  | -0.050116 | -0.110065 | -0.000064 | 0.077762  | -0.008504 | 0.001387  | 0.000214  | -0.004662 |
| 108 | -0.003037 | 0.001553  | 0.022086  | -0.002815 | -0.053978 | -0.131123 | 0.000892  | 0.058395  | -0.009769 | 0.000023  | -0.000459 | -0.007547 |
| 109 | -0.003990 | -0.009106 | 0.151700  | -0.038615 | -0.003642 | 0.004214  | -0.001881 | -0.069582 | 0.236785  | -0.200944 | 0.032522  | 0.010571  |
| 110 | -0.003084 | -0.010165 | -0.038913 | 0.152226  | 0.007914  | 0.001427  | -0.002910 | 0.026201  | -0.189162 | 0.241644  | -0.070831 | 0.012111  |
| 111 | -0.002154 | -0.007803 | 0.008599  | 0.145929  | -0.036571 | -0.002330 | -0.002014 | 0.000109  | 0.012600  | -0.068085 | 0.231312  | -0.184758 |
| 112 | -0.001713 | -0.009813 | -0.003929 | -0.031160 | 0.143738  | 0.005402  | -0.003853 | -0.001922 | 0.009944  | 0.032637  | -0.192091 | 0.227287  |
| 113 | 0.000153  | -0.010142 | -0.000250 | 0.008295  | 0.139000  | -0.027706 | -0.002143 | 0.010361  | -0.001084 | 0.000317  | 0.013593  | -0.069196 |
| 114 | 0.000303  | -0.007682 | 0.006162  | -0.002786 | -0.029146 | 0.140530  | -0.003570 | 0.012818  | -0.000041 | -0.000857 | 0.009203  | 0.029170  |
| 115 | -0.001696 | -0.009762 | -0.035984 | -0.002343 | 0.006461  | 0.145192  | -0.001820 | -0.194716 | 0.030702  | 0.010933  | -0.001720 | -0.000248 |
| 116 | -0.001234 | -0.007981 | 0.151277  | 0.007599  | -0.001202 | -0.041804 | -0.004652 | 0.238645  | -0.068768 | 0.012636  | 0.000160  | -0.001941 |
| 117 | -0.012858 | 0.006080  | -0.016960 | 0.006190  | -0.000146 | -0.005823 | 0.038446  | -0.020786 | -0.034253 | -0.007500 | -0.002571 | 0.020003  |
| 118 | -0.038986 | -0.031242 | -0.009860 | 0.004755  | -0.000150 | -0.000431 | -0.015001 | -0.011833 | -0.018805 | -0.003978 | -0.000467 | 0.009293  |
| 119 | -0.040211 | -0.032130 | -0.007393 | 0.007533  | -0.005551 | -0.001111 | -0.020973 | -0.009414 | -0.017152 | -0.002298 | 0.001294  | -0.001126 |
| 120 | -0.012885 | -0.015425 | 0.000177  | 0.001702  | -0.001291 | -0.000909 | 0.031847  | 0.002075  | 0.001420  | 0.002788  | 0.002967  | -0.000291 |
| 121 | 0.008374  | 0.010428  | 0.000162  | -0.000844 | 0.000665  | 0.000421  | -0.021965 | -0.000908 | -0.000401 | -0.001509 | -0.001644 | -0.000003 |
| 122 | 0.004500  | 0.004999  | -0.000331 | -0.000866 | 0.000614  | 0.000495  | -0.009871 | -0.001143 | -0.001011 | -0.001299 | -0.001344 | 0.000265  |
| 123 | -0.015052 | -0.015662 | -0.000834 | 0.000086  | -0.000768 | -0.000207 | 0.038083  | -0.004063 | -0.004891 | 0.000172  | 0.001276  | 0.005542  |
| 124 | 0.004982  | 0.005828  | 0.000227  | -0.000050 | 0.000134  | -0.000003 | -0.011985 | 0.001586  | 0.001922  | -0.000022 | -0.000619 | -0.002609 |
| 125 | 0.010088  | 0.009828  | 0.000588  | -0.000019 | 0.000652  | 0.000197  | -0.026110 | 0.002419  | 0.002950  | -0.000106 | -0.000614 | -0.002896 |
| 126 | -0.042184 | -0.032135 | -0.014150 | 0.006151  | -0.000281 | 0.000084  | -0.014643 | -0.016016 | -0.028979 | -0.002228 | 0.001435  | 0.004163  |
| 127 | -0.037995 | -0.029912 | -0.000907 | 0.005149  | -0.003019 | -0.002334 | -0.011199 | -0.005319 | -0.006356 | -0.001499 | 0.000418  | 0.001575  |
| 128 | -0.000836 | -0.001814 | 0.000437  | 0.000232  | -0.000410 | -0.000175 | 0.001817  | 0.000707  | 0.000765  | 0.000337  | 0.000170  | -0.000147 |
| 129 | 0.001673  | 0.002550  | -0.000108 | -0.000277 | -0.000075 | 0.000464  | -0.003639 | -0.000436 | -0.000255 | -0.000501 | -0.000203 | -0.000320 |
| 130 | 0.001157  | 0.002501  | -0.000159 | 0.000133  | 0.000172  | -0.000333 | -0.003700 | -0.000331 | -0.000416 | -0.000012 | -0.000372 | -0.000640 |
| 131 | -0.000529 | -0.000978 | -0.000026 | -0.000232 | 0.000020  | 0.000202  | 0.001708  | 0.000104  | -0.000165 | -0.000019 | -0.000053 | 0.000288  |
| 132 | -0.000572 | -0.001080 | -0.000095 | 0.000166  | 0.000139  | -0.000177 | 0.002122  | -0.000146 | -0.000154 | 0.000234  | 0.000358  | 0.000343  |
| 133 | -0.000950 | -0.001289 | -0.000045 | -0.000021 | 0.000152  | 0.000018  | 0.001863  | 0.000114  | 0.000231  | -0.000027 | 0.000113  | 0.000498  |
| 134 | 0.023770  | -0.022098 | 0.013042  | -0.019202 | 0.012029  | 0.005267  | -0.021075 | -0.011677 | 0.040011  | -0.018337 | -0.004710 | 0.003419  |
| 135 | 0.004702  | -0.007396 | -0.001654 | 0.011853  | 0.011910  | 0.005128  | -0.009315 | -0.013229 | -0.003860 | 0.013577  | 0.000781  | 0.000918  |
| 136 | -0.007518 | -0.000939 | -0.004046 | 0.013195  | 0.002863  | 0.002517  | 0.010019  | 0.010021  | -0.040563 | 0.035582  | -0.001869 | 0.000772  |
| 137 | -0.009371 | 0.000369  | -0.014112 | -0.001951 | -0.004054 | -0.005831 | 0.008379  | 0.002915  | -0.030079 | 0.026278  | -0.004473 | 0.002931  |
| 138 | 0.001434  | -0.002557 | -0.022715 | -0.014915 | -0.009835 | -0.005022 | -0.017571 | -0.016971 | 0.011190  | -0.003736 | 0.000126  | -0.000963 |
| 139 | 0.024292  | -0.020136 | -0.013747 | -0.029103 | -0.007413 | 0.004322  | -0.013761 | 0.001476  | 0.003933  | 0.012203  | -0.008762 | 0.010685  |
| 140 | 0.001146  | -0.001291 | -0.012282 | -0.007403 | -0.010093 | -0.004934 | -0.001842 | 0.012724  | -0.021588 | 0.023506  | -0.017163 | -0.000058 |
| 141 | -0.010042 | 0.002781  | -0.010047 | -0.006404 | -0.017011 | 0.000325  | 0.020125  | -0.000289 | -0.003539 | -0.003949 | -0.001405 | -0.001924 |
| 142 | -0.009428 | 0.001352  | 0.004468  | 0.011743  | 0.001569  | 0.003902  | 0.021653  | 0.006216  | 0.001769  | 0.004141  | 0.006653  | 0.001827  |
| 143 | -0.000319 | -0.004697 | 0.006234  | 0.003293  | 0.026144  | 0.007853  | 0.004911  | 0.007300  | -0.001539 | 0.023391  | -0.038635 | 0.021904  |
| 144 | 0.017294  | -0.027724 | 0.004416  | -0.010508 | -0.060461 | -0.038263 | -0.017978 | 0.009085  | -0.000922 | -0.005462 | 0.013699  | -0.012229 |

|     |           |           |           |           |           |           |           |           |           |           |           |           |
|-----|-----------|-----------|-----------|-----------|-----------|-----------|-----------|-----------|-----------|-----------|-----------|-----------|
| 145 | 0.004213  | -0.010823 | 0.015855  | 0.027217  | 0.000970  | 0.001326  | -0.009826 | 0.008439  | 0.002016  | 0.004023  | 0.012318  | -0.015459 |
| 146 | -0.000978 | -0.003957 | 0.004964  | -0.007480 | 0.003142  | -0.001115 | 0.001674  | 0.001789  | 0.001087  | -0.000082 | -0.014225 | 0.022852  |
| 147 | -0.006969 | 0.001617  | -0.002284 | -0.008002 | -0.003101 | -0.008441 | 0.007430  | -0.001873 | 0.002978  | -0.005372 | 0.001157  | -0.010578 |
| 148 | -0.004450 | 0.000822  | -0.003930 | 0.000282  | -0.008051 | 0.000269  | -0.002962 | -0.003100 | 0.003841  | -0.006038 | 0.004916  | -0.017921 |
| 149 | 0.024821  | -0.028404 | 0.011181  | 0.000554  | -0.033924 | -0.028685 | -0.013196 | 0.022923  | 0.008121  | -0.011746 | 0.002958  | -0.005272 |
| 150 | 0.002593  | 0.000597  | -0.010127 | -0.010114 | 0.003809  | -0.026174 | 0.004744  | -0.010896 | 0.006450  | -0.011878 | 0.001320  | -0.003691 |
| 151 | -0.010295 | 0.001322  | -0.016589 | -0.001649 | -0.004300 | 0.001138  | 0.020753  | -0.030559 | 0.008973  | -0.008508 | 0.001325  | -0.006937 |
| 152 | -0.009576 | -0.001236 | -0.007366 | 0.007910  | 0.003168  | 0.003726  | 0.020166  | -0.023052 | 0.003717  | -0.000465 | 0.003231  | -0.006168 |
| 153 | 0.002807  | -0.009461 | 0.015183  | 0.013992  | 0.009664  | 0.005477  | 0.002074  | 0.002066  | 0.006001  | 0.001184  | 0.004817  | -0.000864 |
| 154 | -0.006851 | -0.002739 | -0.020949 | 0.003008  | -0.014896 | -0.009105 | 0.003297  | 0.008946  | -0.032139 | 0.024067  | -0.003739 | -0.002646 |
| 155 | -0.009059 | -0.005135 | 0.014507  | 0.009152  | 0.017524  | 0.004652  | 0.012628  | 0.008457  | 0.002755  | 0.008843  | -0.005556 | 0.006585  |
| 156 | -0.001167 | -0.004798 | -0.011500 | -0.011488 | 0.006562  | -0.016701 | 0.012015  | -0.009768 | 0.007123  | -0.007792 | -0.001695 | -0.005615 |
| 157 | -0.003449 | -0.007255 | -0.006161 | 0.013863  | 0.009001  | 0.014519  | 0.006302  | -0.021330 | 0.001782  | 0.010715  | 0.000724  | -0.001042 |
| 158 | -0.000198 | 0.000182  | 0.000956  | -0.000292 | 0.001993  | -0.002203 | 0.003686  | 0.002283  | 0.000219  | -0.000515 | -0.000753 | 0.003340  |
| 159 | 0.002991  | -0.000538 | -0.002377 | 0.002045  | 0.003293  | -0.001994 | -0.002851 | -0.006814 | -0.002164 | 0.005677  | 0.005804  | 0.008045  |
| 160 | 0.002454  | -0.000665 | -0.002498 | 0.002248  | 0.002402  | -0.001685 | -0.001621 | -0.007809 | -0.002630 | 0.005827  | 0.005725  | 0.004949  |
| 161 | 0.000226  | -0.000088 | -0.000905 | 0.002259  | -0.001501 | 0.000347  | -0.003866 | -0.003540 | -0.002402 | 0.001557  | 0.001385  | -0.001284 |
| 162 | -0.001125 | 0.000096  | 0.008171  | -0.005290 | -0.029954 | 0.026035  | -0.000244 | -0.001837 | -0.003909 | 0.003506  | 0.002387  | 0.002952  |
| 163 | 0.001932  | -0.002156 | -0.001819 | 0.004511  | -0.004250 | 0.001454  | -0.036535 | -0.018610 | -0.004473 | 0.009897  | 0.006632  | -0.014065 |
| 164 | -0.013492 | 0.001534  | 0.012811  | 0.006597  | 0.009156  | -0.002284 | 0.017480  | -0.003183 | -0.019977 | 0.028718  | -0.004508 | 0.003369  |
| 165 | 0.000880  | 0.000595  | 0.001741  | -0.016888 | 0.001307  | 0.005338  | 0.001434  | -0.051326 | 0.055764  | -0.027261 | -0.000442 | 0.000969  |
| 166 | 0.014429  | -0.005279 | 0.020928  | -0.006858 | 0.007835  | 0.015356  | -0.014035 | -0.042257 | 0.101134  | -0.063458 | 0.007743  | -0.003162 |
| 167 | -0.015283 | 0.008504  | 0.001782  | -0.012703 | -0.029110 | -0.004122 | 0.033896  | 0.001932  | 0.012371  | -0.037016 | 0.027466  | -0.003852 |
| 168 | -0.000567 | -0.000859 | 0.005163  | 0.012252  | 0.002988  | 0.000588  | -0.000986 | 0.003794  | 0.001237  | 0.010076  | 0.019239  | -0.000139 |
| 169 | 0.016953  | -0.005654 | -0.008774 | -0.023415 | 0.012971  | -0.008460 | -0.036773 | -0.006116 | -0.002442 | 0.013258  | -0.034227 | 0.013947  |
| 170 | 0.036288  | -0.009369 | -0.018199 | -0.026434 | -0.031624 | 0.015342  | -0.038506 | -0.012031 | -0.007389 | -0.000588 | -0.021159 | 0.028265  |
| 171 | 0.003381  | 0.001502  | -0.005449 | 0.011692  | -0.008969 | 0.001405  | -0.002535 | -0.003625 | -0.001071 | -0.000587 | 0.022458  | -0.048385 |
| 172 | 0.017871  | -0.005065 | 0.002707  | 0.026017  | 0.006755  | 0.007174  | -0.015555 | -0.000460 | -0.005795 | 0.007487  | 0.020160  | -0.036442 |
| 173 | -0.018959 | 0.007014  | -0.019482 | -0.005413 | -0.005290 | -0.011001 | 0.034577  | -0.033539 | 0.013356  | -0.013616 | 0.001765  | -0.012370 |
| 174 | 0.000463  | 0.001090  | 0.005764  | -0.002347 | 0.010340  | -0.015436 | 0.000142  | 0.015252  | -0.002182 | -0.000264 | -0.000295 | -0.001004 |
| 175 | 0.018052  | -0.002210 | 0.007524  | -0.012969 | 0.008246  | -0.021547 | -0.032850 | 0.043403  | -0.007921 | 0.000792  | -0.005541 | 0.010932  |
| 176 | -0.007922 | 0.004563  | -0.011484 | 0.009360  | -0.007670 | -0.029598 | 0.005282  | 0.069311  | -0.099467 | 0.032102  | -0.013057 | 0.006291  |
| 177 | 0.006384  | -0.001953 | 0.057733  | -0.024471 | 0.021226  | -0.008793 | 0.003211  | 0.028951  | 0.038315  | -0.047057 | -0.005176 | 0.005501  |
| 178 | -0.004187 | -0.000145 | 0.017956  | -0.026177 | 0.051389  | -0.001676 | 0.000552  | 0.007020  | 0.012468  | 0.002449  | -0.037736 | 0.027977  |
| 179 | 0.011633  | -0.002250 | -0.011921 | -0.011372 | -0.004346 | -0.019851 | -0.020090 | -0.006484 | 0.006443  | -0.014020 | 0.015879  | -0.044457 |
| 180 | -0.011039 | 0.012024  | 0.001100  | -0.010377 | 0.032003  | -0.053952 | 0.016011  | -0.004843 | 0.006606  | -0.008205 | 0.007858  | -0.010226 |
| 181 | 0.000638  | -0.007442 | 0.022601  | 0.012499  | -0.004400 | 0.001853  | -0.000479 | 0.009198  | -0.005571 | 0.008502  | 0.009216  | 0.001258  |
| 182 | -0.001203 | -0.004619 | -0.012780 | 0.014543  | 0.022021  | 0.002368  | 0.001729  | -0.020239 | -0.016566 | 0.018800  | 0.002293  | 0.003257  |
| 183 | 0.006531  | -0.000880 | 0.035345  | -0.012884 | -0.003737 | -0.057120 | -0.007141 | 0.078859  | -0.026197 | 0.004556  | -0.005825 | 0.007325  |
| 184 | 0.003977  | -0.000543 | -0.000659 | -0.000991 | -0.001520 | 0.003476  | -0.002871 | -0.005364 | -0.001627 | 0.006172  | 0.006718  | 0.000314  |
| 185 | 0.003689  | -0.000742 | -0.002826 | 0.002325  | 0.004438  | -0.002589 | -0.004114 | -0.007886 | -0.001923 | 0.006474  | 0.007196  | 0.011480  |
| 186 | -0.000593 | 0.000396  | 0.000422  | -0.000736 | 0.000512  | -0.000592 | 0.002653  | -0.000086 | 0.000155  | -0.000495 | -0.000665 | -0.001609 |
| 187 | -0.003092 | 0.000597  | 0.003873  | -0.003146 | -0.003346 | 0.002187  | 0.004476  | 0.013572  | 0.003965  | -0.008097 | -0.008559 | -0.006047 |
| 188 | -0.004518 | 0.000100  | -0.000829 | 0.002516  | -0.000235 | -0.002445 | -0.000559 | -0.000084 | -0.000902 | -0.004343 | -0.004915 | -0.004165 |
| 189 | -0.000142 | 0.000112  | 0.000045  | 0.000064  | 0.000035  | -0.000131 | 0.000086  | 0.000100  | 0.000053  | -0.000209 | -0.000075 | -0.000015 |
| 190 | 0.000117  | -0.000477 | -0.014261 | 0.010819  | 0.000118  | -0.000257 | 0.000931  | -0.004983 | -0.009178 | 0.036212  | -0.013516 | 0.002130  |
| 191 | -0.000716 | 0.001454  | 0.004952  | -0.000949 | 0.000395  | 0.001375  | 0.000289  | -0.003583 | 0.011562  | -0.001729 | -0.001171 | 0.001594  |
| 192 | 0.000125  | -0.000209 | -0.003796 | 0.001865  | -0.000031 | 0.000079  | -0.000454 | -0.000028 | -0.007476 | 0.005128  | -0.001412 | -0.000856 |
| 193 | 0.000118  | -0.001068 | 0.006991  | -0.008567 | -0.000167 | -0.000910 | 0.000237  | -0.000676 | 0.010043  | -0.015489 | 0.001228  | 0.001335  |
| 194 | -0.000706 | 0.001990  | -0.005736 | 0.009080  | 0.001174  | 0.002220  | 0.000154  | -0.002661 | -0.005548 | 0.018562  | -0.003991 | 0.000722  |

|     |           |           |           |           |           |           |           |           |           |           |           |           |
|-----|-----------|-----------|-----------|-----------|-----------|-----------|-----------|-----------|-----------|-----------|-----------|-----------|
| 195 | 0.000139  | 0.001248  | 0.010627  | -0.015427 | -0.000085 | -0.000929 | -0.000376 | -0.010400 | 0.030063  | -0.009412 | -0.006317 | 0.002958  |
| 196 | 0.000088  | -0.001138 | 0.002973  | -0.000323 | 0.000069  | -0.000241 | 0.000367  | -0.000044 | 0.002487  | -0.003581 | 0.001079  | 0.000508  |
| 197 | -0.000311 | 0.000405  | 0.000533  | 0.000478  | 0.000422  | 0.000295  | 0.000152  | -0.000667 | 0.001726  | 0.001338  | -0.000477 | 0.000493  |
| 198 | -0.000214 | 0.000544  | -0.000044 | 0.000157  | 0.000135  | 0.000271  | -0.000008 | -0.000206 | 0.000235  | 0.000561  | -0.000224 | 0.000107  |
| 199 | -0.000360 | 0.001432  | 0.000716  | 0.000135  | 0.000367  | 0.000369  | -0.000007 | -0.000432 | 0.001522  | 0.001164  | -0.000705 | 0.000440  |
| 200 | 0.000167  | 0.000046  | 0.000966  | 0.001384  | 0.000039  | 0.000324  | -0.000011 | 0.000474  | -0.000551 | 0.000578  | 0.000251  | 0.000107  |
| 201 | 0.000071  | 0.001407  | 0.000263  | 0.008671  | -0.013046 | -0.000340 | -0.000107 | -0.000429 | 0.001859  | -0.012726 | 0.032416  | -0.008391 |
| 202 | -0.000718 | 0.001884  | 0.001185  | -0.003821 | 0.007002  | 0.001073  | 0.000370  | -0.000655 | 0.002495  | -0.001328 | -0.005510 | 0.014932  |
| 203 | 0.000330  | -0.001138 | -0.000359 | 0.004205  | -0.005649 | 0.000390  | 0.000103  | 0.000717  | -0.000976 | -0.001086 | 0.007184  | -0.009724 |
| 204 | 0.000046  | -0.000040 | -0.000473 | -0.004809 | 0.003423  | -0.000428 | -0.000432 | -0.000322 | 0.000486  | 0.001090  | -0.010132 | 0.005103  |
| 205 | -0.000631 | 0.001519  | 0.001867  | 0.005469  | -0.001945 | 0.001646  | 0.000153  | 0.000128  | 0.001489  | -0.004309 | 0.014133  | -0.000477 |
| 206 | 0.000118  | -0.000643 | -0.000892 | -0.012181 | 0.007428  | -0.000872 | 0.000883  | -0.001274 | 0.002737  | -0.005505 | -0.006891 | 0.025972  |
| 207 | 0.000041  | 0.000181  | 0.000319  | 0.000294  | 0.002037  | -0.000116 | -0.000246 | -0.000232 | 0.000532  | 0.000408  | -0.001992 | 0.001331  |
| 208 | -0.000355 | 0.001410  | 0.000358  | 0.000783  | 0.000089  | 0.000333  | -0.000040 | 0.000085  | 0.000357  | -0.000404 | 0.001726  | 0.001044  |
| 209 | -0.000171 | 0.000497  | 0.000226  | 0.000068  | 0.000106  | 0.000161  | 0.000008  | 0.000110  | 0.000166  | -0.000206 | 0.000460  | 0.000442  |
| 210 | -0.000293 | 0.000277  | 0.000348  | 0.000563  | 0.000378  | 0.000411  | 0.000228  | 0.000113  | 0.000424  | -0.000602 | 0.001706  | 0.001263  |
| 211 | 0.000094  | -0.001009 | 0.000116  | 0.001634  | 0.000554  | 0.000398  | 0.000031  | -0.000239 | 0.000327  | 0.000110  | 0.000751  | -0.000879 |
| 212 | -0.000854 | 0.003893  | -0.000971 | -0.000575 | -0.012918 | 0.007825  | -0.000199 | 0.001506  | -0.000258 | -0.001283 | 0.002681  | -0.005209 |
| 213 | -0.000364 | 0.001697  | 0.001838  | 0.001767  | 0.005698  | -0.002066 | 0.000058  | 0.002446  | -0.000194 | 0.000040  | 0.001269  | -0.004044 |
| 214 | 0.000885  | -0.003669 | -0.000357 | -0.000405 | -0.004952 | 0.003795  | 0.000074  | -0.000637 | 0.000296  | -0.000419 | 0.000611  | 0.001076  |
| 215 | 0.000459  | -0.000521 | 0.000041  | -0.000488 | 0.003580  | -0.005348 | -0.000260 | 0.000846  | -0.000825 | 0.000800  | -0.001218 | -0.000789 |
| 216 | -0.000353 | 0.001360  | 0.000911  | 0.001439  | -0.003851 | 0.006887  | 0.000214  | 0.000914  | 0.000198  | -0.000536 | 0.002613  | -0.001529 |
| 217 | 0.000356  | -0.001476 | -0.000116 | 0.000053  | 0.008742  | -0.012844 | 0.001220  | 0.002675  | -0.000898 | -0.000666 | 0.002257  | -0.012801 |
| 218 | 0.000176  | 0.000552  | 0.000169  | 0.000118  | 0.001041  | 0.000696  | -0.000119 | 0.000273  | -0.000229 | -0.000208 | 0.000209  | 0.000239  |
| 219 | -0.000339 | 0.001729  | 0.000346  | 0.000304  | 0.000474  | 0.000369  | -0.000007 | 0.000407  | -0.000050 | 0.000078  | 0.000338  | -0.000598 |
| 220 | 0.000012  | -0.000211 | 0.000154  | 0.000222  | 0.000047  | 0.000191  | 0.000055  | 0.000102  | 0.000112  | 0.000118  | 0.000123  | -0.000160 |
| 221 | -0.000104 | 0.000000  | 0.000302  | 0.000372  | 0.000718  | 0.000199  | 0.000189  | 0.000418  | -0.000022 | 0.000101  | 0.000473  | -0.000439 |
| 222 | 0.000353  | -0.001724 | -0.000202 | 0.000429  | -0.000036 | 0.002357  | 0.000167  | 0.000103  | -0.000250 | -0.000252 | 0.000684  | 0.000626  |
| 223 | 0.000170  | -0.000477 | -0.013881 | -0.000891 | -0.000680 | 0.008971  | 0.000163  | -0.008233 | -0.005414 | 0.002732  | -0.001251 | -0.000251 |
| 224 | -0.000593 | 0.001597  | 0.009470  | 0.001115  | 0.002097  | -0.005929 | 0.000360  | 0.018819  | -0.003779 | 0.000600  | 0.000357  | -0.000643 |
| 225 | 0.000102  | 0.000120  | -0.007189 | -0.000196 | -0.000780 | 0.005602  | -0.000103 | -0.013261 | 0.000983  | 0.001203  | -0.001093 | 0.000731  |
| 226 | 0.000262  | -0.001099 | 0.004219  | -0.000530 | 0.000200  | -0.005826 | 0.000171  | 0.007463  | -0.001226 | -0.001266 | 0.000856  | -0.000736 |
| 227 | -0.000738 | 0.001751  | -0.003703 | 0.001305  | 0.001495  | 0.007012  | 0.000089  | -0.004912 | -0.001491 | 0.002456  | -0.000525 | 0.000207  |
| 228 | 0.000162  | 0.001363  | 0.008113  | 0.000115  | -0.000564 | -0.012650 | -0.000009 | 0.030856  | -0.012125 | 0.002248  | -0.000925 | -0.000840 |
| 229 | 0.000075  | -0.000937 | 0.001541  | 0.000037  | 0.000475  | 0.000708  | 0.000940  | 0.000767  | 0.000068  | 0.000378  | -0.000345 | 0.000031  |
| 230 | -0.000288 | 0.000302  | 0.000216  | 0.000315  | 0.000388  | 0.000769  | 0.000204  | 0.001270  | -0.000610 | 0.000422  | -0.000035 | 0.000121  |
| 231 | -0.000175 | 0.000622  | 0.000201  | 0.000151  | 0.000208  | -0.000018 | -0.000081 | 0.000565  | -0.000170 | 0.000045  | 0.000051  | 0.000103  |
| 232 | -0.000342 | 0.001415  | 0.000596  | 0.000353  | 0.000331  | 0.000262  | 0.000005  | 0.001417  | -0.000413 | 0.000372  | -0.000071 | -0.000009 |
| 233 | 0.000055  | 0.000119  | -0.000005 | 0.000039  | -0.000130 | 0.002406  | -0.000068 | -0.003042 | 0.000902  | 0.000519  | -0.000366 | -0.000261 |
| 234 | -0.001565 | 0.008105  | 0.021940  | -0.018085 | 0.003485  | 0.001996  | -0.000640 | -0.010936 | 0.048357  | -0.012221 | -0.006218 | 0.005750  |
| 235 | -0.001532 | 0.002246  | -0.022927 | 0.030599  | 0.003469  | 0.004376  | 0.002438  | -0.005597 | -0.015887 | 0.066971  | -0.014542 | 0.002413  |
| 236 | 0.001241  | -0.003303 | -0.002685 | -0.000313 | -0.002686 | -0.002067 | -0.000531 | 0.005126  | -0.014089 | -0.007782 | 0.003908  | -0.003016 |
| 237 | 0.000792  | -0.001473 | -0.002020 | -0.003766 | -0.002725 | -0.001640 | -0.001150 | 0.003821  | -0.011008 | -0.012245 | 0.003809  | -0.002784 |
| 238 | -0.000138 | -0.000991 | 0.001404  | 0.000016  | 0.000491  | -0.000241 | 0.000580  | 0.000122  | 0.002085  | -0.002610 | 0.001159  | 0.000768  |
| 239 | 0.000151  | -0.001339 | 0.000609  | -0.000605 | 0.000090  | -0.000502 | 0.000315  | 0.000788  | -0.000142 | -0.003659 | 0.001416  | 0.000159  |
| 240 | -0.000505 | 0.001625  | 0.000181  | 0.001877  | 0.001096  | 0.001279  | 0.000016  | -0.000699 | 0.002191  | 0.004300  | -0.000803 | 0.000496  |
| 241 | -0.000508 | 0.001419  | 0.000195  | 0.001925  | 0.001104  | 0.001229  | 0.000143  | -0.000689 | 0.002154  | 0.004349  | -0.000791 | 0.000549  |
| 242 | 0.000133  | 0.000156  | 0.000168  | -0.000251 | -0.000415 | 0.000059  | -0.000331 | 0.001039  | -0.002318 | -0.001614 | 0.000984  | -0.000829 |
| 243 | -0.000222 | 0.001660  | 0.000849  | 0.000355  | -0.000038 | 0.000413  | -0.000357 | 0.000677  | -0.000882 | 0.000347  | 0.000214  | -0.000310 |
| 244 | 0.000879  | -0.004059 | 0.000871  | -0.006042 | -0.001725 | -0.002289 | -0.000010 | 0.003021  | -0.005766 | -0.017092 | 0.004866  | -0.001493 |

|     |           |           |           |           |           |           |           |           |           |           |           |           |
|-----|-----------|-----------|-----------|-----------|-----------|-----------|-----------|-----------|-----------|-----------|-----------|-----------|
| 245 | 0.001269  | -0.004036 | 0.001598  | -0.005882 | -0.002146 | -0.002625 | -0.000468 | 0.003302  | -0.004408 | -0.019066 | 0.006055  | -0.001703 |
| 246 | -0.001741 | 0.002057  | 0.002581  | -0.012731 | 0.017677  | 0.001808  | 0.001937  | -0.000258 | 0.004328  | -0.005916 | -0.004507 | 0.042353  |
| 247 | -0.001722 | 0.008037  | 0.003963  | 0.020476  | -0.015480 | 0.004376  | 0.000432  | -0.000474 | 0.003913  | -0.012906 | 0.051158  | -0.006252 |
| 248 | 0.001360  | -0.003751 | -0.002143 | -0.002215 | -0.001441 | -0.002242 | -0.000467 | -0.000079 | -0.002390 | 0.003430  | -0.009809 | -0.011917 |
| 249 | 0.001178  | -0.004342 | -0.002226 | -0.002652 | -0.002328 | -0.001790 | -0.000026 | 0.000333  | -0.002298 | 0.003506  | -0.011268 | -0.010582 |
| 250 | -0.000347 | 0.001679  | 0.000065  | 0.001341  | 0.000078  | 0.000036  | -0.000439 | -0.000072 | 0.000195  | 0.001106  | -0.000568 | -0.000195 |
| 251 | 0.000048  | 0.000337  | -0.000233 | 0.000749  | -0.000633 | -0.000332 | -0.000462 | 0.000048  | -0.000301 | 0.001364  | -0.001635 | -0.002264 |
| 252 | -0.000483 | 0.001271  | 0.001239  | 0.001292  | 0.000742  | 0.001289  | 0.000260  | 0.000207  | 0.000597  | -0.000726 | 0.003615  | 0.003038  |
| 253 | -0.000513 | 0.001540  | 0.001259  | 0.001181  | 0.000908  | 0.001270  | 0.000136  | 0.000195  | 0.000613  | -0.000713 | 0.003515  | 0.003125  |
| 254 | 0.000216  | -0.001320 | -0.000348 | -0.000287 | 0.000232  | -0.000017 | 0.000270  | 0.000156  | -0.000571 | 0.000929  | -0.001932 | -0.001826 |
| 255 | -0.000082 | -0.000938 | -0.000007 | 0.000377  | 0.000907  | 0.000368  | 0.000573  | 0.000182  | -0.000048 | 0.000288  | 0.000087  | -0.000356 |
| 256 | 0.000842  | -0.001247 | -0.001888 | -0.004051 | -0.000745 | -0.002208 | -0.001330 | 0.000048  | -0.001898 | 0.004205  | -0.013479 | -0.008353 |
| 257 | 0.001240  | -0.003302 | -0.002265 | -0.003703 | 0.000312  | -0.002565 | -0.000889 | -0.000293 | -0.002133 | 0.005487  | -0.015559 | -0.006435 |
| 258 | -0.000494 | 0.001641  | 0.003648  | 0.003438  | 0.021202  | -0.015745 | 0.003154  | 0.004096  | -0.000265 | 0.000109  | 0.003992  | -0.013627 |
| 259 | -0.005166 | 0.018770  | 0.003046  | 0.003148  | -0.012871 | 0.016998  | -0.001571 | 0.004044  | 0.000174  | -0.001341 | 0.004488  | -0.005838 |
| 260 | 0.001397  | -0.005720 | -0.002416 | -0.002081 | -0.004146 | 0.000772  | -0.000419 | -0.002599 | 0.000313  | -0.000265 | -0.002014 | 0.005664  |
| 261 | 0.002681  | -0.011443 | -0.002131 | -0.001953 | -0.003597 | -0.000242 | 0.000045  | -0.002102 | 0.000188  | 0.000183  | -0.001997 | 0.004425  |
| 262 | -0.000663 | 0.004161  | 0.000173  | -0.000049 | 0.000123  | 0.000717  | -0.000474 | 0.000331  | -0.000265 | 0.000153  | -0.000162 | 0.000313  |
| 263 | -0.000194 | 0.001772  | -0.000218 | -0.000432 | -0.000465 | 0.000111  | -0.000364 | -0.000230 | -0.000247 | 0.000224  | -0.000674 | 0.001080  |
| 264 | -0.000483 | 0.001239  | 0.001358  | 0.001233  | 0.001446  | 0.000746  | 0.000191  | 0.000596  | 0.000273  | 0.000167  | 0.000547  | -0.000764 |
| 265 | -0.000649 | 0.002088  | 0.001372  | 0.001253  | 0.001446  | 0.000565  | 0.000061  | 0.000620  | 0.000252  | 0.000189  | 0.000492  | -0.000777 |
| 266 | 0.000507  | -0.002482 | -0.000225 | -0.000196 | 0.000726  | -0.000405 | 0.000146  | -0.000341 | 0.000034  | -0.000012 | -0.000190 | 0.001200  |
| 267 | 0.000282  | -0.002049 | 0.000081  | 0.000089  | 0.001356  | 0.000280  | 0.000383  | 0.000149  | 0.000026  | -0.000098 | 0.000399  | 0.000970  |
| 268 | 0.001129  | -0.002699 | -0.002226 | -0.002105 | -0.003498 | -0.002329 | -0.001072 | -0.002136 | -0.000175 | 0.000454  | -0.002354 | 0.003647  |
| 269 | 0.001650  | -0.005257 | -0.002466 | -0.002346 | -0.001859 | -0.001330 | -0.000081 | -0.002435 | -0.000306 | 0.000238  | -0.002530 | 0.003747  |
| 270 | -0.001805 | 0.007301  | 0.024532  | 0.003875  | 0.004912  | -0.019112 | -0.000105 | 0.057760  | -0.013648 | 0.003101  | 0.000628  | -0.000861 |
| 271 | -0.001395 | 0.002254  | -0.015484 | 0.002672  | 0.002041  | 0.019976  | 0.001485  | -0.008159 | -0.005167 | 0.004681  | -0.001285 | 0.000173  |
| 272 | 0.001225  | -0.002916 | -0.005556 | -0.001969 | -0.003072 | 0.002161  | -0.000934 | -0.018442 | 0.005622  | -0.001553 | -0.000758 | 0.000485  |
| 273 | 0.000838  | -0.001118 | -0.004854 | -0.001795 | -0.002713 | 0.000053  | -0.000649 | -0.015522 | 0.004478  | -0.001563 | -0.000343 | 0.000430  |
| 274 | -0.000111 | -0.000979 | 0.001231  | -0.000249 | 0.000612  | 0.000064  | 0.000639  | 0.001523  | 0.000166  | -0.000367 | 0.000446  | -0.000250 |
| 275 | 0.000173  | -0.001342 | 0.000896  | -0.000645 | 0.000292  | -0.000939 | 0.000301  | -0.000116 | 0.000889  | -0.000960 | 0.000546  | -0.000291 |
| 276 | -0.000508 | 0.001517  | 0.002197  | 0.001148  | 0.001439  | -0.000190 | -0.000017 | 0.004984  | -0.000775 | 0.000395  | 0.000327  | 0.000035  |
| 277 | -0.000487 | 0.001241  | 0.002002  | 0.001180  | 0.001402  | 0.000006  | 0.000107  | 0.004707  | -0.000811 | 0.000408  | 0.000329  | 0.000061  |
| 278 | 0.000088  | 0.000343  | -0.001328 | 0.000245  | -0.000778 | 0.001483  | -0.000202 | -0.004491 | 0.001241  | 0.000261  | -0.000512 | 0.000371  |
| 279 | -0.000277 | 0.001596  | -0.000664 | 0.000540  | -0.000413 | 0.002146  | -0.000219 | -0.003330 | 0.001034  | 0.000752  | -0.000610 | 0.000340  |
| 280 | 0.001035  | -0.004163 | -0.002459 | -0.002568 | -0.001732 | -0.002662 | 0.000034  | -0.011134 | 0.003441  | -0.002434 | 0.000664  | -0.000020 |
| 281 | 0.001215  | -0.003708 | -0.000663 | -0.002438 | -0.001996 | -0.002833 | -0.000439 | -0.008032 | 0.003565  | -0.002719 | 0.000567  | -0.000472 |
| 282 | 0.000226  | 0.000786  | -0.043283 | 0.042912  | 0.000186  | 0.003062  | -0.000968 | 0.007205  | -0.069780 | 0.075765  | -0.010494 | -0.001031 |
| 283 | -0.000260 | 0.001305  | 0.001499  | -0.001344 | -0.000245 | 0.000345  | -0.000113 | -0.001888 | 0.005384  | -0.005529 | 0.002203  | -0.000366 |
| 284 | 0.000042  | -0.000475 | 0.000912  | -0.001047 | -0.000373 | -0.000110 | 0.000134  | -0.000689 | 0.002013  | -0.001374 | -0.000278 | 0.000332  |
| 285 | 0.000002  | -0.000350 | 0.003620  | -0.003377 | -0.000469 | 0.000042  | 0.000129  | -0.001041 | 0.006487  | -0.006939 | 0.001439  | -0.000154 |
| 286 | -0.000023 | -0.000212 | 0.001196  | -0.000585 | -0.000159 | 0.000113  | 0.000094  | 0.000541  | 0.000809  | -0.001975 | 0.001010  | -0.000424 |
| 287 | -0.000261 | 0.000180  | -0.000469 | 0.001401  | -0.000265 | -0.000722 | 0.000613  | 0.002280  | -0.004792 | 0.003973  | -0.000828 | 0.000215  |
| 288 | -0.000285 | -0.000613 | 0.000553  | 0.037914  | -0.038261 | 0.001186  | 0.000809  | 0.000565  | -0.000801 | -0.009441 | 0.067943  | -0.063522 |
| 289 | -0.000258 | 0.000152  | -0.000287 | -0.001895 | 0.001964  | 0.000288  | 0.000472  | 0.000397  | -0.000381 | 0.002188  | -0.005961 | 0.005798  |
| 290 | 0.000006  | 0.000206  | -0.000261 | -0.001066 | 0.000956  | -0.000048 | -0.000136 | -0.000316 | 0.000404  | -0.000286 | -0.001561 | 0.002008  |
| 291 | -0.000070 | 0.000463  | -0.000353 | -0.003247 | 0.003295  | 0.000169  | -0.000113 | 0.000038  | -0.000198 | 0.001311  | -0.006656 | 0.006148  |
| 292 | -0.000106 | 0.000584  | -0.000243 | -0.000207 | 0.000426  | 0.000279  | -0.000104 | 0.000104  | -0.000480 | 0.000998  | -0.001510 | 0.000085  |
| 293 | -0.000435 | 0.001693  | -0.000085 | 0.001863  | -0.001733 | -0.000120 | -0.000097 | -0.000354 | 0.000310  | -0.001279 | 0.005233  | -0.006209 |
| 294 | -0.000672 | 0.001408  | 0.001689  | 0.000285  | 0.036029  | -0.036208 | 0.000285  | 0.001027  | -0.000120 | 0.000046  | -0.000154 | -0.009029 |

|     |           |           |           |           |           |           |           |           |           |           |           |           |
|-----|-----------|-----------|-----------|-----------|-----------|-----------|-----------|-----------|-----------|-----------|-----------|-----------|
| 295 | 0.000227  | -0.000612 | 0.000190  | 0.000013  | -0.001867 | 0.001680  | -0.000021 | 0.000205  | -0.000261 | 0.000205  | -0.000208 | 0.001378  |
| 296 | -0.000008 | -0.000177 | 0.000327  | -0.000278 | -0.000020 | 0.000283  | -0.000077 | -0.000163 | 0.000118  | 0.000190  | -0.000584 | 0.000962  |
| 297 | 0.000052  | -0.000596 | 0.000252  | -0.000372 | -0.003075 | 0.003102  | 0.000045  | 0.000165  | -0.000077 | 0.000031  | -0.000191 | 0.001235  |
| 298 | 0.000121  | -0.000758 | -0.000116 | -0.000211 | -0.000924 | 0.000780  | -0.000006 | 0.000259  | -0.000012 | -0.000302 | 0.000393  | -0.000351 |
| 299 | 0.000454  | -0.002795 | -0.000331 | 0.000226  | 0.002138  | -0.002060 | -0.000051 | -0.000487 | 0.000268  | -0.000280 | 0.000218  | -0.002095 |
| 300 | 0.000174  | -0.000893 | 0.041269  | 0.000053  | 0.001226  | -0.041045 | -0.000386 | 0.072696  | -0.009756 | -0.000727 | 0.000217  | -0.000087 |
| 301 | 0.000549  | -0.001780 | -0.001762 | 0.000381  | 0.000259  | 0.001664  | 0.000017  | -0.004477 | 0.000994  | -0.000161 | 0.000244  | -0.000121 |
| 302 | -0.000160 | 0.000650  | -0.000449 | -0.000193 | 0.000291  | 0.000652  | -0.000087 | -0.001840 | 0.000938  | -0.000546 | 0.000140  | 0.000118  |
| 303 | -0.000060 | 0.000547  | -0.003910 | -0.000290 | 0.000160  | 0.003795  | -0.000076 | -0.007532 | 0.001336  | -0.000137 | -0.000041 | -0.000032 |
| 304 | -0.000001 | 0.000322  | -0.001329 | -0.000309 | 0.000012  | 0.000922  | -0.000036 | -0.001701 | -0.000389 | 0.000334  | -0.000318 | -0.000071 |
| 305 | 0.000230  | -0.000022 | 0.001763  | 0.000223  | -0.000082 | -0.002238 | -0.000194 | 0.005883  | -0.002234 | 0.000232  | -0.000281 | 0.000157  |
| 306 | 0.000219  | 0.0002181 | 0.006009  | -0.018101 | -0.016137 | -0.015693 | 0.000064  | 0.001434  | 0.000792  | -0.042149 | 0.010523  | -0.002123 |
| 307 | 0.000010  | -0.000070 | -0.005884 | 0.006883  | -0.001214 | 0.001365  | -0.000028 | -0.000904 | -0.005337 | 0.005860  | 0.001756  | -0.001738 |
| 308 | 0.000035  | 0.000197  | -0.006412 | 0.005674  | 0.000214  | 0.000195  | -0.000249 | 0.000891  | -0.010736 | 0.012264  | -0.002783 | 0.000802  |
| 309 | 0.000079  | -0.000032 | -0.004107 | 0.003973  | 0.000314  | 0.000246  | -0.000143 | 0.000955  | -0.006958 | 0.007538  | -0.001285 | -0.000224 |
| 310 | 0.000070  | -0.000359 | 0.004043  | -0.004011 | -0.000035 | -0.000068 | 0.000039  | -0.000787 | 0.006794  | -0.007286 | 0.001180  | -0.000007 |
| 311 | 0.000013  | -0.000448 | 0.005790  | -0.005952 | -0.000621 | -0.000484 | 0.000193  | -0.002164 | 0.011410  | -0.011635 | 0.001470  | 0.000187  |
| 312 | -0.000201 | 0.000698  | 0.006220  | -0.006242 | 0.001338  | -0.001236 | 0.000184  | 0.002053  | 0.004282  | -0.006156 | -0.000432 | 0.000975  |
| 313 | -0.000027 | 0.002631  | -0.013884 | -0.016755 | 0.003657  | -0.012860 | 0.001057  | -0.001758 | -0.001030 | 0.007630  | -0.035658 | -0.002141 |
| 314 | -0.000383 | 0.001224  | -0.001125 | 0.006148  | -0.005943 | 0.001182  | 0.000107  | 0.000963  | -0.001959 | 0.001959  | 0.004535  | -0.005484 |
| 315 | 0.000067  | -0.000646 | 0.000358  | 0.004528  | -0.004782 | -0.000254 | 0.000183  | -0.000449 | 0.000954  | -0.002652 | 0.010555  | -0.008770 |
| 316 | 0.000115  | -0.000449 | 0.000264  | 0.003533  | -0.003562 | 0.000060  | 0.000012  | 0.000105  | -0.000130 | -0.001057 | 0.006735  | -0.006146 |
| 317 | 0.000069  | -0.000005 | -0.000071 | -0.003404 | 0.003432  | 0.000033  | -0.000099 | 0.000081  | -0.000170 | 0.001082  | -0.006467 | 0.005976  |
| 318 | 0.000039  | 0.000239  | -0.000561 | -0.005317 | 0.005225  | -0.000238 | -0.000245 | -0.000198 | 0.000195  | 0.001350  | -0.010821 | 0.010442  |
| 319 | 0.000099  | -0.000376 | 0.001133  | -0.005343 | 0.005463  | -0.000782 | 0.000041  | -0.000505 | 0.001113  | -0.000732 | -0.004274 | 0.003720  |
| 320 | 0.000514  | -0.004110 | 0.012800  | 0.013771  | 0.015636  | -0.004562 | 0.000004  | 0.001410  | 0.000913  | 0.001431  | 0.001498  | -0.008334 |
| 321 | 0.000101  | -0.001948 | 0.001242  | -0.001305 | 0.005306  | -0.005464 | 0.000323  | 0.001787  | -0.000796 | 0.000262  | -0.000853 | 0.000767  |
| 322 | -0.000233 | 0.001351  | 0.000295  | 0.000465  | 0.004999  | -0.004884 | -0.000046 | -0.000650 | 0.000368  | 0.000173  | -0.000179 | -0.001271 |
| 323 | -0.000131 | 0.000661  | -0.000130 | 0.000167  | 0.003156  | -0.003145 | -0.000073 | 0.000131  | -0.000028 | -0.000092 | 0.000208  | -0.001078 |
| 324 | -0.000032 | 0.000046  | -0.000053 | -0.000247 | -0.003469 | 0.003435  | 0.000090  | 0.000122  | -0.000068 | -0.000115 | 0.000172  | 0.001018  |
| 325 | 0.000077  | -0.000416 | 0.000438  | -0.000460 | -0.003957 | 0.004239  | 0.000019  | 0.000075  | -0.000101 | 0.000576  | -0.001145 | 0.002546  |
| 326 | 0.000207  | 0.000352  | -0.001790 | 0.001384  | -0.006255 | 0.006066  | -0.000316 | -0.001471 | 0.000629  | -0.000801 | 0.001795  | -0.001913 |
| 327 | 0.000111  | -0.002323 | 0.013455  | 0.015909  | 0.015149  | -0.000510 | -0.000174 | 0.033605  | -0.009183 | 0.001992  | 0.001549  | 0.001804  |
| 328 | 0.000144  | 0.000455  | 0.003864  | -0.000858 | 0.000789  | -0.004299 | -0.000370 | 0.002916  | 0.000569  | -0.000758 | 0.000050  | -0.000487 |
| 329 | -0.000022 | -0.000340 | 0.006291  | 0.000477  | 0.000169  | -0.005865 | 0.000050  | 0.011938  | -0.001380 | -0.000227 | 0.000224  | 0.000340  |
| 330 | -0.000076 | -0.000054 | 0.004398  | -0.000140 | 0.000040  | -0.004336 | 0.000039  | 0.007731  | -0.001109 | -0.000006 | 0.000053  | -0.000150 |
| 331 | -0.000116 | 0.000526  | -0.004408 | -0.000149 | -0.000169 | 0.004371  | -0.000006 | -0.007931 | 0.001159  | 0.000308  | -0.000262 | 0.000026  |
| 332 | -0.000140 | 0.000644  | -0.005711 | -0.000160 | 0.000167  | 0.005956  | -0.000042 | -0.012321 | 0.002750  | -0.000929 | 0.000487  | 0.000001  |
| 333 | 0.000204  | -0.001216 | -0.004623 | 0.000834  | -0.001002 | 0.004382  | 0.000330  | -0.002682 | -0.001925 | 0.001610  | -0.000552 | 0.000275  |

|   | 13        | 14        | 15        | 16        | 17        | 18        | 19        | 20        | 21        | 22        | 23       | 24        |
|---|-----------|-----------|-----------|-----------|-----------|-----------|-----------|-----------|-----------|-----------|----------|-----------|
| 1 | -0.020091 | -0.020431 | -0.012748 | 0.002614  | -0.001594 | -0.000475 | 0.001104  | -0.003252 | 0.003661  | -0.008056 | 0.005370 | -0.008016 |
| 2 | 0.046604  | 0.051997  | 0.037001  | 0.027374  | -0.007843 | 0.028295  | 0.028174  | -0.006592 | 0.027712  | 0.019589  | 0.009948 | 0.026431  |
| 3 | 0.048393  | 0.029419  | -0.344956 | 0.022400  | 0.204475  | 0.026345  | -0.274020 | 0.189479  | 0.185595  | 0.011517  | 0.012167 | 0.008220  |
| 4 | 0.032502  | 0.046849  | 0.051107  | 0.177476  | 0.183000  | -0.267700 | 0.022141  | 0.204936  | 0.017198  | -0.272255 | 0.194924 | 0.175889  |
| 5 | 0.520223  | -0.338832 | 0.029815  | 0.009436  | 0.012490  | 0.011278  | 0.179322  | 0.199009  | -0.278180 | 0.038518  | 0.205998 | 0.025175  |
| 6 | -0.346311 | 0.524389  | 0.542834  | -0.276116 | 0.198792  | 0.175171  | 0.010024  | 0.011115  | 0.010707  | 0.177155  | 0.203678 | -0.273709 |
| 7 | 0.003748  | -0.006651 | -0.012573 | 0.001269  | 0.011293  | 0.003198  | 0.007535  | 0.000680  | 0.007882  | 0.006719  | 0.000832 | 0.006733  |
| 8 | -0.000657 | 0.010687  | -0.483026 | 1.382490  | 1.393680  | -0.026077 | -0.030332 | 0.060842  | -0.037413 | -0.009009 | 0.007329 | -0.006718 |

|    |           |           |           |           |           |           |           |           |           |           |           |           |
|----|-----------|-----------|-----------|-----------|-----------|-----------|-----------|-----------|-----------|-----------|-----------|-----------|
| 9  | 0.019038  | 0.018649  | 0.013529  | -0.022263 | 1.402490  | 1.374040  | -0.218986 | 0.017291  | 0.213437  | -0.007204 | 0.006703  | -0.010779 |
| 10 | 0.019757  | 0.020456  | -0.004803 | 0.206492  | 0.012048  | -0.208595 | 1.396830  | 1.407220  | -0.048328 | -0.030274 | 0.060410  | -0.039032 |
| 11 | 0.011530  | -0.005303 | 0.021228  | -0.038840 | 0.060707  | -0.031783 | -0.044847 | 1.408020  | 1.396670  | -0.211821 | 0.011577  | 0.211279  |
| 12 | -0.376065 | 0.009422  | 0.015346  | -0.009461 | 0.005827  | -0.006324 | 0.211547  | 0.014253  | -0.218886 | 1.380950  | 1.389910  | -0.023709 |
| 13 | 5.181110  | -0.466527 | 0.004466  | -0.005854 | 0.007985  | -0.010113 | -0.038572 | 0.061109  | -0.028917 | -0.024748 | 1.387060  | 1.373060  |
| 14 | -0.466527 | 5.222700  | -0.365104 | -0.030625 | 0.060838  | -0.038844 | -0.009097 | 0.005297  | -0.005354 | 0.209628  | 0.017959  | -0.212114 |
| 15 | 0.004466  | -0.365104 | 5.206120  | -0.212932 | 0.013966  | 0.209749  | -0.007775 | 0.005031  | -0.010791 | -0.037769 | 0.060005  | -0.032104 |
| 16 | -0.005854 | -0.030625 | -0.212932 | 5.967330  | 0.005316  | -1.132150 | 0.007551  | -0.027838 | 0.042002  | 0.021025  | -0.025351 | 0.020711  |
| 17 | 0.007985  | 0.060838  | 0.013966  | 0.005316  | 5.716410  | 0.007704  | -0.046975 | -0.046870 | -0.026886 | -0.026520 | -0.003599 | -0.024433 |
| 18 | -0.010113 | -0.038844 | 0.209749  | -1.132150 | 0.007704  | 5.959930  | 0.030004  | -0.046253 | 0.007286  | 0.020366  | -0.025892 | 0.021716  |
| 19 | -0.038572 | -0.009097 | -0.007775 | 0.007551  | -0.046975 | 0.030004  | 5.937620  | -0.001769 | -1.135410 | 0.005897  | -0.026049 | 0.040838  |
| 20 | 0.061109  | 0.005297  | 0.005031  | -0.027838 | -0.046870 | -0.046253 | -0.001769 | 5.775100  | 0.007057  | -0.047592 | -0.049320 | -0.024258 |
| 21 | -0.028917 | -0.005354 | -0.010791 | 0.042002  | -0.026886 | 0.007286  | -1.135410 | 0.007057  | 5.956580  | 0.029576  | -0.047179 | 0.005867  |
| 22 | -0.024748 | 0.209628  | -0.037769 | 0.021025  | -0.026520 | 0.020366  | 0.005897  | -0.047592 | 0.029576  | 5.980760  | 0.005298  | -1.130150 |
| 23 | 1.387060  | 0.017959  | 0.060005  | -0.025351 | -0.003599 | -0.025892 | -0.026049 | -0.049320 | -0.047179 | 0.005298  | 5.748270  | 0.002804  |
| 24 | 1.373060  | -0.212114 | -0.032104 | 0.020711  | -0.024433 | 0.021716  | 0.040838  | -0.024258 | 0.005867  | -1.130150 | 0.002804  | 5.978780  |
| 25 | -0.211854 | 1.376340  | -0.033647 | 0.007140  | -0.026441 | 0.041683  | 0.022080  | -0.024634 | 0.020393  | 0.006354  | -0.045821 | 0.029990  |
| 26 | 0.019934  | 1.405160  | 1.401380  | -0.047414 | -0.047894 | -0.027230 | -0.025303 | -0.004412 | -0.025097 | -0.027781 | -0.051397 | -0.045639 |
| 27 | 0.204740  | -0.020544 | 1.385640  | 0.031032  | -0.048220 | 0.007490  | 0.020522  | -0.026125 | 0.020980  | 0.039783  | -0.028331 | 0.005958  |
| 28 | -0.015127 | 0.025940  | -0.031633 | -0.320290 | -0.401852 | 0.877816  | -0.188365 | -0.188464 | -0.108435 | -0.046624 | -0.052910 | -0.007346 |
| 29 | 0.024110  | -0.020827 | 0.027035  | -0.113093 | -0.182030 | -0.194224 | 0.888805  | -0.407201 | -0.340657 | 0.011653  | -0.094811 | 0.021275  |
| 30 | 0.208788  | 0.027521  | -0.019487 | 0.017755  | -0.092671 | 0.013726  | -0.336830 | -0.406961 | 0.884647  | -0.197276 | -0.191874 | -0.110432 |
| 31 | -0.241757 | -0.024435 | 0.022350  | -0.007269 | -0.051473 | -0.045377 | -0.107229 | -0.189833 | -0.192595 | 0.890494  | -0.414700 | -0.326513 |
| 32 | 1.016380  | -0.491445 | 0.206901  | -0.044681 | -0.048979 | -0.008888 | 0.019365  | -0.089513 | 0.011381  | -0.328790 | -0.414308 | 0.882799  |
| 33 | -0.475244 | 1.008320  | -0.251947 | 0.013443  | -0.090666 | 0.018631  | -0.007706 | -0.050128 | -0.045232 | -0.114035 | -0.193835 | -0.189877 |
| 34 | -0.021795 | -0.249968 | 1.019980  | -0.198720 | -0.185487 | -0.109442 | -0.043482 | -0.054982 | -0.005327 | 0.017539  | -0.094356 | 0.012996  |
| 35 | 0.027338  | 0.209868  | -0.500816 | 0.886431  | -0.409663 | -0.327363 | 0.011502  | -0.090482 | 0.017860  | -0.010519 | -0.052323 | -0.043534 |
| 36 | -0.001109 | -0.001397 | 0.027713  | -0.045481 | 0.062061  | 0.063565  | 0.001572  | 0.001759  | 0.000438  | 0.000833  | 0.001464  | 0.001017  |
| 37 | -0.000331 | -0.001853 | -0.001720 | 0.063792  | 0.062213  | -0.043337 | 0.001883  | 0.003339  | 0.000848  | 0.000824  | 0.001384  | 0.000841  |
| 38 | -0.002098 | -0.000187 | -0.001128 | 0.001074  | 0.004018  | 0.001983  | -0.049483 | 0.062794  | 0.066199  | 0.001528  | 0.001842  | 0.000466  |
| 39 | -0.001538 | -0.000730 | -0.000524 | 0.000510  | 0.001986  | 0.001699  | 0.066593  | 0.062690  | -0.046367 | 0.001691  | 0.003478  | 0.001028  |
| 40 | 0.011041  | -0.002049 | -0.001741 | 0.000816  | 0.001424  | 0.000836  | 0.000841  | 0.003257  | 0.001792  | -0.044635 | 0.062501  | 0.064051  |
| 41 | -0.062010 | 0.027032  | -0.001449 | 0.000784  | 0.001413  | 0.000748  | 0.000316  | 0.001956  | 0.001587  | 0.064243  | 0.062676  | -0.043677 |
| 42 | 0.024855  | -0.057732 | 0.010430  | 0.001584  | 0.001835  | 0.000266  | 0.000706  | 0.001340  | 0.000752  | 0.000742  | 0.003277  | 0.001690  |
| 43 | -0.001950 | 0.011209  | -0.061721 | 0.001708  | 0.003515  | 0.000842  | 0.000755  | 0.001394  | 0.000729  | 0.000393  | 0.002049  | 0.001645  |
| 44 | 0.000474  | -0.000504 | 0.008064  | -0.020638 | 0.003135  | 0.002428  | 0.017245  | 0.002294  | -0.029373 | -0.000522 | -0.005217 | 0.000875  |
| 45 | -0.012225 | 0.008026  | -0.000268 | 0.000985  | -0.005068 | -0.000255 | -0.024941 | 0.002927  | 0.008839  | 0.003212  | 0.003635  | -0.019339 |
| 46 | 0.022796  | 0.010003  | -0.012220 | -0.000597 | -0.004645 | 0.000979  | 0.000806  | -0.004577 | -0.000366 | -0.024341 | 0.003057  | 0.006976  |
| 47 | 0.008373  | -0.011280 | 0.010723  | 0.012877  | 0.003105  | -0.026748 | -0.000231 | -0.005140 | 0.000877  | 0.000682  | -0.005203 | -0.000558 |
| 48 | 0.009534  | 0.005995  | 0.003684  | -0.002169 | 0.005317  | 0.000260  | 0.000442  | 0.000367  | 0.001191  | 0.000226  | 0.000768  | -0.002977 |
| 49 | -0.002037 | -0.000070 | -0.000015 | 0.003717  | -0.003711 | 0.001792  | 0.001241  | -0.000528 | 0.001962  | 0.002321  | -0.001568 | 0.001205  |
| 50 | -0.000459 | 0.002929  | 0.006166  | 0.003803  | -0.014775 | -0.001516 | -0.005360 | 0.003909  | -0.004012 | -0.004523 | 0.000510  | -0.005109 |
| 51 | 0.000892  | -0.001958 | -0.003583 | 0.005734  | -0.003661 | 0.003126  | 0.003536  | -0.000238 | 0.002994  | 0.003086  | -0.000615 | 0.002339  |
| 52 | -0.009058 | 0.001215  | 0.001147  | -0.006104 | 0.012140  | -0.006283 | -0.001656 | 0.006200  | -0.001714 | 0.003936  | -0.006867 | 0.003020  |
| 53 | -0.005088 | 0.002374  | 0.001842  | 0.000046  | 0.000074  | -0.000140 | -0.000266 | 0.000718  | -0.000069 | 0.001449  | -0.002030 | -0.003074 |
| 54 | -0.000182 | -0.000227 | -0.000229 | 0.000515  | -0.000577 | 0.000435  | 0.000283  | -0.000100 | 0.000390  | 0.000432  | -0.000029 | 0.000311  |
| 55 | 0.000578  | 0.001253  | 0.001369  | 0.000063  | 0.001104  | -0.000081 | -0.000245 | 0.000476  | 0.000092  | 0.000071  | 0.000329  | 0.000174  |
| 56 | 0.000265  | 0.000433  | -0.000311 | 0.002682  | -0.003763 | -0.005203 | -0.000386 | 0.002560  | -0.000975 | -0.000211 | 0.000610  | -0.000336 |
| 57 | -0.000551 | -0.000331 | -0.000394 | 0.000226  | 0.000139  | 0.000034  | 0.000201  | 0.000148  | 0.000056  | 0.000198  | -0.000472 | 0.000169  |
| 58 | -0.000685 | -0.000606 | -0.000579 | 0.000309  | 0.000017  | -0.000048 | 0.000191  | -0.000396 | 0.000218  | 0.000215  | -0.000403 | 0.000209  |

|     |           |           |           |           |           |           |           |           |           |           |           |           |
|-----|-----------|-----------|-----------|-----------|-----------|-----------|-----------|-----------|-----------|-----------|-----------|-----------|
| 59  | -0.000891 | -0.000470 | -0.000814 | 0.000088  | -0.000486 | 0.000289  | 0.000189  | 0.000298  | 0.000100  | 0.000277  | -0.000420 | 0.000250  |
| 60  | -0.004768 | -0.006599 | 0.007100  | -0.006938 | 0.001815  | -0.003998 | -0.005047 | 0.003360  | -0.008126 | -0.006013 | 0.000964  | -0.003577 |
| 61  | 0.013631  | 0.004999  | 0.020322  | 0.013202  | -0.037970 | 0.022215  | 0.007962  | 0.004801  | -0.013457 | 0.008180  | -0.041305 | 0.017071  |
| 62  | 0.004741  | 0.003702  | -0.001475 | -0.003421 | 0.012461  | -0.008262 | 0.009117  | -0.028431 | 0.017797  | -0.019311 | 0.044517  | -0.005580 |
| 63  | -0.006712 | -0.016310 | 0.010060  | -0.004845 | 0.019549  | -0.009562 | 0.006912  | -0.016665 | -0.003534 | -0.003124 | -0.008272 | -0.003707 |
| 64  | -0.005223 | -0.011632 | -0.007263 | 0.002330  | -0.035260 | 0.007338  | -0.006114 | 0.000804  | -0.006111 | 0.000333  | 0.009074  | 0.021336  |
| 65  | -0.010929 | 0.018261  | -0.008566 | -0.003489 | 0.002336  | -0.000662 | -0.005313 | 0.004936  | 0.006944  | 0.000923  | 0.001765  | 0.004192  |
| 66  | 0.003020  | 0.003440  | 0.010533  | -0.001789 | 0.021181  | -0.002183 | 0.000157  | 0.004403  | 0.002831  | 0.005928  | -0.003065 | -0.020040 |
| 67  | 0.007842  | -0.005979 | -0.020369 | 0.001805  | 0.015924  | -0.018629 | -0.010981 | -0.007446 | 0.008632  | -0.012825 | 0.048190  | -0.011117 |
| 68  | -0.001770 | 0.008283  | -0.005417 | 0.001487  | -0.011462 | 0.001885  | -0.009356 | 0.023114  | -0.008306 | 0.014652  | -0.037526 | 0.005562  |
| 69  | -0.003528 | -0.001026 | -0.026562 | -0.092710 | 0.164590  | 0.125055  | 0.126030  | 0.166068  | -0.093524 | 0.024742  | -0.164662 | -0.057548 |
| 70  | -0.083436 | -0.019710 | -0.007020 | -0.060111 | -0.156151 | 0.024608  | -0.094113 | 0.161170  | 0.127788  | 0.130595  | 0.160566  | -0.092748 |
| 71  | 0.102959  | 0.111357  | -0.085136 | 0.025348  | -0.163285 | -0.058728 | -0.060985 | -0.165281 | 0.027337  | -0.092487 | 0.168183  | 0.121456  |
| 72  | -0.016175 | -0.088428 | 0.116502  | 0.127253  | 0.157341  | -0.092702 | 0.026722  | -0.159617 | -0.060642 | -0.062034 | -0.163136 | 0.026867  |
| 73  | 0.008980  | -0.045640 | -0.465392 | 0.706160  | -1.118440 | -0.429843 | 0.020704  | 0.078476  | 0.030833  | -0.002650 | 0.044843  | 0.031962  |
| 74  | 0.000628  | 0.019303  | -0.136218 | 0.412992  | -0.590016 | -0.820501 | -0.022512 | -0.053654 | 0.003707  | -0.009522 | -0.016357 | -0.007730 |
| 75  | 0.001774  | 0.012589  | 0.028069  | -0.813841 | -0.588689 | 0.407502  | -0.011156 | -0.057600 | -0.013572 | -0.008661 | -0.016686 | -0.008602 |
| 76  | 0.000665  | -0.028067 | 0.178608  | -0.429540 | -1.111730 | 0.706513  | -0.160934 | 0.263919  | 0.169670  | 0.034759  | 0.045789  | -0.007128 |
| 77  | -0.028776 | 0.003160  | 0.013876  | 0.163383  | 0.258923  | -0.154328 | 0.719318  | -1.124130 | -0.442020 | 0.022774  | 0.080693  | 0.031006  |
| 78  | 0.012595  | 0.000999  | -0.001752 | -0.014351 | -0.058274 | -0.011252 | 0.418053  | -0.598007 | -0.818218 | -0.022232 | -0.055745 | 0.004538  |
| 79  | 0.019696  | -0.000385 | -0.000400 | 0.002864  | -0.054153 | -0.021890 | -0.817571 | -0.595005 | 0.415468  | -0.011469 | -0.060289 | -0.012532 |
| 80  | -0.044547 | 0.008893  | 0.006209  | 0.031893  | 0.078828  | 0.021173  | -0.441229 | -1.122890 | 0.721481  | -0.154496 | 0.266927  | 0.161029  |
| 81  | -0.109612 | 0.172874  | -0.027626 | -0.004118 | 0.042347  | 0.033223  | 0.165224  | 0.264265  | -0.157377 | 0.705183  | -1.121520 | -0.433640 |
| 82  | 0.364681  | 0.031753  | 0.011598  | -0.008742 | -0.016478 | -0.008536 | -0.013339 | -0.060014 | -0.011458 | 0.405265  | -0.586145 | -0.814326 |
| 83  | 0.623733  | -0.132017 | 0.017868  | -0.008220 | -0.015841 | -0.008887 | 0.003558  | -0.054392 | -0.022890 | -0.816846 | -0.585668 | 0.404471  |
| 84  | 0.927353  | -0.465388 | -0.046519 | 0.031611  | 0.045998  | -0.004069 | 0.030970  | 0.079860  | 0.021355  | -0.433357 | -1.132810 | 0.695801  |
| 85  | -0.472890 | 0.927557  | -0.107323 | 0.020332  | 0.078190  | 0.031509  | -0.005435 | 0.044134  | 0.033020  | 0.168273  | 0.275482  | -0.158296 |
| 86  | -0.128323 | 0.629580  | 0.370235  | -0.022172 | -0.054212 | 0.004196  | -0.008676 | -0.016351 | -0.008266 | -0.014410 | -0.059855 | -0.010556 |
| 87  | 0.033195  | 0.371171  | 0.632277  | -0.010892 | -0.059261 | -0.012716 | -0.008251 | -0.016794 | -0.008693 | 0.002588  | -0.055932 | -0.022260 |
| 88  | 0.167262  | -0.099502 | 0.931394  | -0.155411 | 0.265129  | 0.161813  | 0.032884  | 0.043527  | -0.005059 | 0.033052  | 0.079175  | 0.020282  |
| 89  | 0.000420  | 0.002820  | -0.024956 | -0.193223 | -0.155637 | 0.260082  | 0.263911  | -0.159558 | -0.197781 | -0.008530 | -0.022705 | 0.000400  |
| 90  | 0.038595  | -0.021563 | 0.001684  | 0.000040  | -0.021142 | -0.008768 | -0.197971 | -0.158664 | 0.266906  | 0.266838  | -0.161931 | -0.198177 |
| 91  | -0.036835 | -0.047451 | 0.039742  | -0.009362 | -0.020258 | 0.000854  | 0.000753  | -0.020900 | -0.008725 | -0.197754 | -0.161313 | 0.265205  |
| 92  | -0.023480 | 0.041233  | -0.043323 | 0.262610  | -0.160325 | -0.195388 | -0.009349 | -0.021696 | 0.001150  | 0.000513  | -0.021069 | -0.009572 |
| 93  | -0.001052 | -0.010349 | 0.059222  | -0.106018 | 0.218802  | 0.406080  | 0.011351  | 0.028239  | -0.000087 | 0.005696  | 0.008435  | 0.004829  |
| 94  | 0.000424  | -0.008943 | 0.077016  | -0.306921 | 0.371176  | 0.414321  | 0.011187  | 0.025452  | -0.003631 | 0.003832  | 0.007923  | 0.002897  |
| 95  | -0.000508 | -0.004677 | -0.017523 | 0.411894  | 0.370234  | -0.305601 | 0.004979  | 0.027986  | 0.006023  | 0.003485  | 0.007940  | 0.003255  |
| 96  | -0.001443 | -0.007737 | -0.010523 | 0.402222  | 0.218150  | -0.102106 | 0.006425  | 0.030024  | 0.007411  | 0.005364  | 0.008605  | 0.005174  |
| 97  | -0.007891 | -0.000825 | 0.000229  | 0.007733  | 0.030248  | 0.006456  | -0.107404 | 0.222354  | 0.403852  | 0.011166  | 0.029194  | -0.000595 |
| 98  | -0.004752 | -0.000133 | 0.001496  | 0.006615  | 0.028151  | 0.004766  | -0.310609 | 0.375645  | 0.414537  | 0.011103  | 0.026458  | -0.004013 |
| 99  | -0.009200 | 0.000764  | 0.000619  | -0.003212 | 0.025508  | 0.010931  | 0.414261  | 0.374319  | -0.310024 | 0.004953  | 0.029232  | 0.005783  |
| 100 | -0.010555 | -0.000421 | -0.000086 | 0.000276  | 0.028373  | 0.011001  | 0.403434  | 0.220922  | -0.105267 | 0.006565  | 0.031128  | 0.006760  |
| 101 | -0.203364 | -0.012967 | -0.007051 | 0.005269  | 0.008518  | 0.005223  | 0.007186  | 0.031098  | 0.006653  | -0.102631 | 0.217650  | 0.405157  |
| 102 | -0.160929 | -0.018987 | -0.004455 | 0.003408  | 0.007941  | 0.003298  | 0.006078  | 0.028977  | 0.004950  | -0.302644 | 0.368781  | 0.409077  |
| 103 | -0.325336 | 0.075212  | -0.008244 | 0.003157  | 0.007607  | 0.003538  | -0.003462 | 0.025809  | 0.011440  | 0.413575  | 0.369209  | -0.304798 |
| 104 | -0.298329 | 0.056827  | -0.009617 | 0.005056  | 0.008273  | 0.005343  | -0.000069 | 0.028636  | 0.011424  | 0.403141  | 0.216267  | -0.099644 |
| 105 | 0.056664  | -0.305909 | -0.206180 | 0.011101  | 0.028708  | -0.000332 | 0.005282  | 0.008550  | 0.005108  | 0.007797  | 0.031169  | 0.006123  |
| 106 | 0.071930  | -0.323999 | -0.163601 | 0.010947  | 0.025435  | -0.003814 | 0.003349  | 0.007744  | 0.003215  | 0.006533  | 0.028805  | 0.004535  |
| 107 | -0.020220 | -0.162052 | -0.330983 | 0.004766  | 0.028587  | 0.005814  | 0.003175  | 0.008137  | 0.003369  | -0.002895 | 0.026471  | 0.010942  |
| 108 | -0.013583 | -0.208248 | -0.301977 | 0.006277  | 0.030746  | 0.006876  | 0.005122  | 0.008592  | 0.005248  | 0.000481  | 0.029318  | 0.011016  |



|     |           |           |           |           |           |           |           |           |           |           |           |           |
|-----|-----------|-----------|-----------|-----------|-----------|-----------|-----------|-----------|-----------|-----------|-----------|-----------|
| 109 | -0.001208 | -0.000787 | 0.013202  | 0.018185  | 0.083582  | -0.014371 | -0.259302 | 0.077099  | 0.188327  | 0.004332  | 0.012213  | 0.001772  |
| 110 | 0.000627  | -0.001968 | 0.011648  | 0.175308  | 0.072184  | -0.246109 | -0.004400 | 0.082578  | 0.009401  | 0.004347  | 0.010276  | -0.002331 |
| 111 | 0.029087  | 0.009157  | -0.001022 | -0.002488 | 0.009545  | 0.004556  | 0.012959  | 0.082527  | -0.011357 | -0.248260 | 0.075421  | 0.176034  |
| 112 | -0.067873 | 0.012388  | -0.000423 | 0.002247  | 0.011322  | 0.004308  | 0.184489  | 0.076417  | -0.254963 | -0.018271 | 0.086010  | 0.021893  |
| 113 | 0.220748  | -0.173351 | 0.026546  | 0.004355  | 0.010346  | 0.001442  | -0.002782 | 0.009748  | 0.004281  | 0.017590  | 0.084517  | -0.017200 |
| 114 | -0.183636 | 0.220304  | -0.066100 | 0.004952  | 0.009814  | -0.002251 | 0.001947  | 0.010975  | 0.004527  | 0.180120  | 0.077077  | -0.248001 |
| 115 | 0.013209  | -0.070368 | 0.237374  | -0.254552 | 0.076759  | 0.183008  | 0.004151  | 0.011394  | 0.001064  | -0.002259 | 0.010067  | 0.004768  |
| 116 | 0.009988  | 0.029312  | -0.195104 | -0.007546 | 0.083587  | 0.012055  | 0.005104  | 0.010012  | -0.002224 | 0.001846  | 0.010950  | 0.004550  |
| 117 | 0.035546  | 0.007552  | 0.006555  | 0.013427  | -0.027920 | 0.005907  | -0.001325 | -0.003871 | 0.000392  | -0.012444 | 0.019624  | -0.006461 |
| 118 | 0.013935  | 0.004059  | 0.005477  | 0.004047  | -0.014074 | -0.000094 | -0.003492 | 0.000222  | -0.002690 | -0.007230 | 0.006692  | -0.006962 |
| 119 | -0.005856 | 0.002576  | 0.005462  | 0.003583  | -0.012472 | -0.000218 | -0.004144 | 0.001699  | -0.003142 | -0.003259 | -0.000097 | -0.004151 |
| 120 | -0.000216 | 0.001544  | 0.002471  | -0.000487 | -0.000981 | -0.001929 | -0.002229 | 0.002217  | -0.002132 | -0.001537 | -0.000660 | -0.002017 |
| 121 | 0.000119  | -0.000951 | -0.001476 | 0.000431  | 0.000571  | 0.001241  | 0.001336  | -0.001320 | 0.001329  | 0.000967  | 0.000412  | 0.001286  |
| 122 | 0.000085  | -0.000567 | -0.000969 | 0.000055  | 0.000442  | 0.000674  | 0.000897  | -0.000917 | 0.000811  | 0.000571  | 0.000225  | 0.000743  |
| 123 | 0.005568  | 0.004289  | 0.004160  | 0.000389  | -0.004837 | -0.001293 | -0.001900 | 0.001093  | -0.001512 | -0.003017 | 0.003232  | -0.003416 |
| 124 | -0.002877 | -0.001815 | -0.001738 | -0.000042 | 0.001000  | 0.000377  | 0.000518  | -0.000381 | 0.000656  | 0.001151  | -0.001291 | 0.001366  |
| 125 | -0.002675 | -0.002510 | -0.002463 | -0.000345 | 0.003767  | 0.000948  | 0.001373  | -0.000668 | 0.000837  | 0.001866  | -0.001910 | 0.002034  |
| 126 | 0.003474  | 0.002854  | 0.005308  | 0.005696  | -0.016788 | -0.000809 | -0.003822 | 0.002848  | -0.003694 | -0.004982 | 0.003895  | -0.004425 |
| 127 | 0.000804  | 0.001482  | 0.002628  | 0.002521  | -0.009734 | -0.001607 | -0.003099 | 0.002034  | -0.002728 | -0.004169 | 0.002033  | -0.003709 |
| 128 | -0.000302 | 0.000038  | 0.000197  | -0.000230 | 0.000786  | -0.000076 | -0.000115 | 0.000085  | -0.000149 | -0.000059 | -0.000286 | -0.000088 |
| 129 | -0.000085 | -0.000757 | -0.000457 | 0.000312  | 0.000076  | 0.000107  | 0.000265  | -0.000232 | 0.000164  | 0.000252  | -0.000164 | 0.000229  |
| 130 | -0.000636 | -0.000035 | -0.000465 | 0.000176  | -0.000102 | 0.000242  | 0.000230  | 0.000142  | 0.000292  | 0.000360  | -0.000408 | 0.000308  |
| 131 | 0.000212  | 0.000341  | 0.000211  | 0.000170  | 0.000180  | -0.000461 | -0.000184 | -0.000254 | 0.000058  | -0.000138 | 0.000164  | -0.000121 |
| 132 | 0.000311  | 0.000163  | 0.000206  | -0.000188 | -0.000906 | 0.000194  | -0.000049 | 0.000534  | -0.000289 | -0.000159 | 0.000208  | -0.000143 |
| 133 | 0.000516  | 0.000269  | 0.000328  | -0.000247 | -0.000043 | -0.000017 | -0.000159 | -0.000268 | -0.000085 | -0.000269 | 0.000498  | -0.000196 |
| 134 | -0.005460 | 0.003868  | -0.006467 | -0.064156 | -0.003085 | 0.067951  | -0.001279 | 0.005350  | 0.001547  | 0.002080  | 0.002201  | -0.002022 |
| 135 | 0.004635  | -0.001183 | 0.016730  | -0.023357 | 0.009682  | 0.023694  | 0.005367  | 0.011049  | -0.002357 | -0.000563 | 0.000909  | 0.003333  |
| 136 | 0.000436  | 0.004534  | 0.008188  | 0.022050  | -0.015678 | -0.041902 | 0.011102  | 0.015929  | -0.004405 | 0.002465  | 0.000504  | -0.001789 |
| 137 | -0.006403 | 0.006184  | 0.000534  | 0.017876  | -0.005102 | -0.011463 | 0.008991  | 0.015321  | -0.004838 | 0.006811  | -0.004908 | -0.006141 |
| 138 | -0.010930 | 0.002706  | -0.000191 | -0.038449 | -0.007964 | 0.055495  | 0.006272  | -0.002633 | -0.002450 | 0.006129  | -0.007474 | -0.005358 |
| 139 | -0.006034 | 0.003219  | -0.002942 | 0.007562  | 0.016002  | 0.004608  | 0.056260  | -0.059899 | -0.034972 | 0.008741  | -0.014648 | -0.015262 |
| 140 | -0.008587 | 0.002288  | -0.009084 | 0.012666  | 0.001074  | -0.007597 | 0.039890  | -0.003850 | -0.027923 | 0.008563  | -0.015019 | -0.009376 |
| 141 | -0.005725 | 0.004756  | -0.003303 | -0.000303 | 0.014963  | -0.003551 | 0.003428  | 0.000784  | 0.022609  | 0.004487  | -0.010866 | -0.008205 |
| 142 | 0.003210  | 0.002206  | -0.006997 | 0.003808  | 0.013890  | -0.002375 | -0.011987 | -0.016445 | -0.006487 | -0.002669 | -0.004073 | -0.000670 |
| 143 | 0.002624  | 0.002929  | -0.004378 | 0.004303  | 0.009912  | -0.001196 | 0.054901  | 0.019610  | -0.063976 | -0.000945 | -0.000822 | -0.008300 |
| 144 | 0.026707  | 0.011472  | -0.016669 | 0.009762  | -0.000490 | 0.000541  | -0.006601 | -0.002295 | 0.006885  | -0.036829 | -0.144186 | 0.072985  |
| 145 | 0.026852  | -0.001141 | -0.003378 | 0.004558  | 0.002009  | -0.000006 | 0.001982  | -0.009991 | -0.003930 | -0.068741 | 0.019523  | 0.059028  |
| 146 | -0.006005 | 0.005926  | -0.002375 | 0.001695  | 0.000310  | 0.000315  | 0.001908  | -0.002428 | -0.004116 | 0.005593  | -0.015469 | -0.007954 |
| 147 | -0.009252 | -0.003720 | -0.000944 | 0.000967  | -0.006236 | 0.000860  | -0.004248 | -0.008300 | 0.003888  | 0.018434  | 0.028677  | -0.003504 |
| 148 | -0.003671 | -0.002857 | 0.003724  | 0.000761  | -0.007264 | 0.002657  | -0.007846 | -0.018266 | 0.006686  | -0.019415 | 0.044440  | 0.010543  |
| 149 | -0.011374 | 0.051724  | -0.051387 | 0.000384  | 0.002655  | 0.001287  | -0.001079 | 0.002897  | 0.004275  | 0.000193  | -0.002265 | 0.008429  |
| 150 | 0.011755  | -0.016318 | 0.001970  | -0.002577 | -0.008527 | 0.003007  | -0.002224 | -0.008482 | 0.004217  | -0.007814 | -0.006003 | 0.010097  |
| 151 | 0.027214  | -0.034653 | 0.043545  | -0.012268 | -0.006699 | 0.004970  | -0.004381 | -0.005567 | 0.005558  | -0.007819 | 0.012041  | 0.010078  |
| 152 | 0.033424  | -0.045206 | 0.041460  | -0.008344 | -0.004345 | 0.001363  | -0.002553 | 0.003421  | 0.004085  | -0.009465 | 0.007408  | 0.016388  |
| 153 | 0.008514  | 0.002328  | 0.003583  | -0.007792 | -0.000590 | 0.004902  | -0.000760 | 0.005275  | 0.001678  | -0.006591 | 0.002166  | 0.009711  |
| 154 | -0.008050 | 0.003180  | -0.005000 | 0.015610  | 0.008127  | -0.022789 | 0.007439  | 0.007755  | -0.000425 | 0.007510  | -0.010463 | -0.007962 |
| 155 | 0.006216  | 0.000083  | -0.006796 | 0.005761  | 0.007417  | -0.002922 | 0.011045  | -0.011120 | -0.011493 | -0.003491 | 0.011067  | 0.003210  |
| 156 | 0.017574  | -0.030498 | 0.011345  | -0.003279 | -0.005928 | 0.002839  | -0.005093 | -0.010824 | 0.005247  | -0.000926 | 0.018913  | -0.002112 |
| 157 | 0.009027  | -0.005243 | 0.034382  | -0.012669 | -0.003430 | 0.007515  | 0.002974  | 0.009304  | 0.000371  | -0.003334 | 0.001383  | 0.008291  |
| 158 | 0.002026  | -0.001322 | -0.000833 | -0.000029 | 0.003086  | -0.000998 | -0.000364 | -0.000710 | 0.000460  | 0.000560  | 0.002740  | -0.001040 |

|     |           |           |           |           |           |           |           |           |           |           |           |           |
|-----|-----------|-----------|-----------|-----------|-----------|-----------|-----------|-----------|-----------|-----------|-----------|-----------|
| 159 | 0.003457  | -0.007123 | -0.007391 | 0.000244  | -0.009036 | 0.004245  | -0.001071 | 0.005672  | -0.002385 | -0.000188 | 0.006537  | -0.003169 |
| 160 | 0.002148  | -0.004821 | -0.005471 | 0.000178  | -0.009378 | 0.004329  | -0.001105 | 0.005877  | -0.002517 | 0.000061  | 0.004202  | -0.002104 |
| 161 | -0.000801 | 0.000847  | -0.000247 | -0.000609 | -0.003959 | 0.001437  | -0.000207 | 0.001652  | -0.000740 | 0.000079  | -0.001694 | 0.000613  |
| 162 | -0.000301 | 0.000432  | -0.001750 | 0.002905  | -0.002595 | 0.002997  | -0.002701 | 0.002327  | -0.002502 | -0.002599 | -0.000300 | -0.003151 |
| 163 | -0.005495 | 0.009641  | 0.001625  | 0.001956  | -0.020119 | 0.007580  | -0.000407 | 0.008291  | -0.003622 | 0.001729  | -0.012476 | 0.005149  |
| 164 | 0.001134  | 0.007002  | 0.006625  | 0.017086  | -0.027986 | -0.017238 | 0.011007  | 0.023999  | -0.003994 | 0.005076  | -0.001732 | -0.003027 |
| 165 | 0.000660  | -0.000692 | 0.008656  | -0.036429 | -0.001870 | 0.063165  | -0.007516 | 0.001044  | 0.002352  | 0.001337  | -0.000906 | -0.000559 |
| 166 | 0.010496  | -0.010159 | 0.009322  | -0.073648 | -0.000406 | 0.072096  | -0.022816 | -0.023216 | 0.009581  | -0.010179 | 0.007416  | 0.009665  |
| 167 | -0.008425 | 0.006372  | -0.007458 | 0.001440  | 0.022464  | -0.004401 | -0.047458 | 0.015209  | 0.048121  | 0.008607  | -0.018051 | -0.012015 |
| 168 | 0.002291  | -0.001109 | -0.001549 | 0.001321  | -0.003825 | 0.000910  | -0.023173 | -0.001072 | -0.013443 | 0.001007  | -0.002287 | 0.001004  |
| 169 | -0.004267 | -0.004323 | 0.008341  | -0.004763 | -0.023709 | 0.005484  | 0.025265  | 0.045253  | -0.034850 | 0.005575  | 0.006830  | 0.002773  |
| 170 | 0.001787  | 0.006614  | 0.016725  | -0.010332 | 0.002059  | 0.004854  | 0.004675  | 0.027110  | -0.000340 | 0.011241  | -0.050357 | 0.014093  |
| 171 | -0.000048 | -0.011486 | 0.005473  | -0.002135 | -0.000757 | -0.000446 | -0.002044 | 0.004211  | 0.006577  | -0.014431 | 0.039109  | 0.032061  |
| 172 | 0.041445  | -0.016655 | 0.007283  | -0.003217 | 0.007692  | -0.001156 | 0.005640  | 0.015139  | 0.001401  | -0.057770 | -0.004520 | 0.049831  |
| 173 | 0.056933  | -0.077809 | 0.051004  | -0.015030 | -0.007885 | 0.005180  | -0.007363 | -0.006573 | 0.008636  | -0.013911 | 0.018085  | 0.023343  |
| 174 | 0.020515  | -0.030570 | -0.005363 | 0.005946  | 0.000935  | -0.001321 | 0.000573  | 0.001856  | -0.000032 | -0.001345 | -0.000856 | 0.006652  |
| 175 | -0.033351 | 0.027168  | -0.056837 | 0.020000  | 0.007302  | -0.002944 | 0.004358  | -0.003492 | -0.006776 | 0.012712  | -0.011513 | -0.020581 |
| 176 | -0.008892 | 0.001230  | -0.029805 | 0.092915  | 0.039046  | -0.104841 | 0.000170  | 0.001494  | 0.001428  | 0.008555  | -0.007976 | -0.005490 |
| 177 | 0.012492  | -0.007927 | -0.018860 | 0.023179  | 0.008092  | -0.000216 | -0.026566 | -0.014094 | 0.018041  | -0.007622 | 0.009096  | 0.011879  |
| 178 | 0.021048  | -0.013214 | -0.004953 | 0.005378  | -0.002469 | 0.005520  | 0.022168  | -0.037255 | -0.020513 | -0.014294 | 0.031457  | 0.029695  |
| 179 | 0.028759  | -0.013233 | 0.004903  | -0.002102 | -0.013029 | 0.005635  | -0.009027 | -0.013244 | 0.011217  | -0.056703 | 0.028689  | 0.057490  |
| 180 | 0.047954  | -0.054957 | -0.006082 | 0.001579  | -0.013630 | -0.002436 | -0.007110 | -0.004346 | 0.006332  | -0.030361 | 0.010337  | 0.025465  |
| 181 | -0.008311 | 0.061260  | -0.040076 | 0.003984  | -0.004727 | -0.007338 | 0.003766  | 0.014841  | -0.001860 | -0.015169 | -0.022455 | 0.018364  |
| 182 | 0.006146  | -0.025809 | 0.074654  | 0.009948  | 0.005640  | -0.016229 | 0.006755  | 0.016971  | -0.005717 | 0.002341  | -0.014902 | 0.001351  |
| 183 | -0.011531 | 0.004145  | -0.060880 | 0.052355  | 0.015495  | -0.043399 | 0.005194  | 0.002642  | -0.006106 | 0.008794  | -0.016115 | -0.009459 |
| 184 | -0.000404 | -0.003609 | -0.006509 | 0.000843  | -0.006893 | 0.004065  | -0.001751 | 0.006672  | -0.003089 | -0.000350 | -0.000329 | -0.000584 |
| 185 | 0.005015  | -0.009626 | -0.009088 | 0.000372  | -0.010953 | 0.004948  | -0.000902 | 0.006260  | -0.002832 | -0.000549 | 0.009094  | -0.004115 |
| 186 | -0.000150 | 0.000999  | 0.001144  | 0.000498  | 0.001583  | -0.000849 | -0.000170 | -0.001064 | 0.000329  | 0.000454  | -0.000397 | 0.000316  |
| 187 | -0.003074 | 0.006960  | 0.007329  | -0.000925 | 0.014760  | -0.005915 | 0.001307  | -0.007132 | 0.003585  | 0.000070  | -0.005902 | 0.002711  |
| 188 | -0.001168 | 0.005555  | 0.007374  | -0.000658 | 0.001680  | -0.002395 | 0.001479  | -0.004943 | 0.002071  | 0.000265  | -0.002505 | 0.001686  |
| 189 | 0.000023  | 0.000004  | -0.000024 | -0.000070 | -0.000331 | 0.000158  | 0.000124  | -0.000104 | -0.000008 | 0.000000  | 0.000007  | 0.000037  |
| 190 | -0.000477 | -0.001312 | 0.002735  | 0.004556  | 0.004394  | -0.002127 | 0.025443  | 0.001572  | -0.011158 | 0.001194  | -0.000492 | 0.001121  |
| 191 | 0.000005  | -0.000226 | 0.001375  | -0.005881 | 0.001978  | 0.005142  | -0.009845 | 0.004797  | 0.001536  | -0.000899 | 0.001143  | -0.000084 |
| 192 | 0.000456  | -0.000567 | 0.000900  | 0.001948  | 0.000300  | -0.005780 | 0.003436  | -0.001763 | -0.002194 | 0.000674  | -0.000557 | 0.000511  |
| 193 | -0.001033 | 0.001052  | -0.001431 | -0.002663 | -0.001151 | 0.005418  | -0.008807 | 0.000423  | 0.004462  | -0.000662 | 0.000672  | -0.000392 |
| 194 | 0.000388  | -0.000935 | 0.003086  | -0.000212 | 0.004132  | -0.009907 | 0.006183  | 0.002718  | -0.007048 | 0.000782  | -0.000415 | 0.000458  |
| 195 | -0.001428 | -0.000178 | 0.001150  | -0.005821 | 0.002033  | 0.017625  | -0.003470 | 0.003632  | 0.006503  | 0.000356  | 0.000038  | 0.001036  |
| 196 | -0.000177 | -0.000277 | 0.000253  | 0.000260  | 0.000724  | -0.000914 | -0.001180 | 0.002646  | -0.000013 | 0.000211  | -0.000246 | 0.000441  |
| 197 | 0.000024  | 0.000040  | 0.000364  | 0.000072  | 0.000908  | -0.000557 | -0.000775 | 0.001095  | -0.000259 | -0.000053 | 0.000213  | 0.000024  |
| 198 | 0.000049  | 0.000131  | 0.000222  | 0.000335  | 0.000184  | -0.000811 | -0.000740 | 0.000179  | 0.000326  | -0.000107 | 0.000258  | -0.000111 |
| 199 | -0.000017 | 0.000032  | 0.000384  | -0.000057 | 0.001111  | -0.000757 | -0.000630 | 0.000791  | 0.000122  | -0.000084 | 0.000221  | 0.000026  |
| 200 | -0.000218 | -0.000139 | 0.000307  | -0.001147 | 0.001897  | 0.001103  | -0.000659 | 0.000461  | 0.000141  | -0.000029 | -0.000209 | 0.000142  |
| 201 | -0.004404 | 0.002311  | -0.001122 | 0.001238  | -0.000646 | 0.000806  | -0.010937 | 0.001597  | 0.020935  | -0.001903 | 0.004498  | 0.004131  |
| 202 | -0.003597 | 0.000954  | 0.000280  | -0.000230 | 0.000831  | -0.000460 | 0.001466  | 0.003988  | -0.009843 | 0.004316  | 0.002718  | -0.005640 |
| 203 | 0.000056  | 0.001083  | -0.000736 | 0.000212  | -0.000349 | 0.000938  | -0.002232 | -0.001197 | 0.003978  | -0.005554 | -0.000185 | 0.001572  |
| 204 | -0.000750 | -0.000800 | 0.000175  | -0.000164 | 0.000680  | -0.000781 | 0.003359  | 0.000554  | -0.006686 | 0.004410  | -0.001547 | -0.002761 |
| 205 | -0.002566 | 0.002546  | -0.000418 | 0.000589  | -0.000434 | 0.000303  | -0.006733 | 0.002120  | 0.005583  | -0.008620 | 0.004315  | -0.000555 |
| 206 | -0.010472 | 0.001898  | -0.000376 | 0.000771  | 0.000138  | 0.000846  | 0.006173  | 0.004220  | -0.003761 | 0.016559  | 0.002145  | -0.005802 |
| 207 | 0.000073  | 0.000108  | -0.000273 | 0.000338  | -0.000393 | 0.000214  | -0.001145 | 0.001835  | 0.000007  | -0.000533 | 0.000626  | 0.000012  |
| 208 | -0.000614 | 0.000378  | -0.000115 | 0.000003  | 0.000227  | -0.000031 | -0.000191 | 0.001181  | -0.000723 | -0.000671 | 0.000828  | 0.000022  |

|     |           |           |           |           |           |           |           |           |           |           |           |           |
|-----|-----------|-----------|-----------|-----------|-----------|-----------|-----------|-----------|-----------|-----------|-----------|-----------|
| 209 | -0.000173 | 0.000095  | 0.000077  | -0.000103 | 0.000290  | -0.000075 | 0.000321  | 0.000182  | -0.000738 | -0.000819 | 0.000250  | 0.000312  |
| 210 | -0.000424 | 0.000496  | -0.000039 | -0.000005 | 0.000292  | -0.000037 | 0.000124  | 0.000888  | -0.000641 | -0.000796 | 0.001113  | -0.000082 |
| 211 | 0.000426  | 0.000417  | -0.000078 | 0.000083  | -0.000155 | 0.000019  | 0.000222  | 0.000522  | -0.000808 | 0.001031  | 0.001904  | -0.000952 |
| 212 | -0.007983 | 0.027143  | -0.010667 | 0.000916  | -0.000163 | 0.001198  | 0.000730  | 0.000171  | 0.000447  | 0.005995  | 0.004033  | -0.003497 |
| 213 | 0.013560  | -0.001177 | -0.002414 | -0.000479 | 0.000565  | -0.000091 | 0.000459  | -0.000546 | 0.000451  | -0.006497 | 0.002296  | 0.005339  |
| 214 | -0.010171 | 0.005797  | -0.000774 | 0.000827  | -0.000394 | 0.000308  | -0.000292 | 0.000578  | -0.000580 | 0.003144  | 0.000552  | -0.006231 |
| 215 | 0.006174  | -0.009493 | 0.000004  | -0.000756 | 0.000366  | -0.000237 | 0.000348  | -0.000354 | 0.000781  | -0.002022 | -0.001237 | 0.003519  |
| 216 | -0.004876 | 0.014620  | -0.003611 | 0.000333  | -0.000155 | 0.000503  | -0.000160 | 0.000892  | -0.000626 | 0.001152  | 0.003999  | -0.009335 |
| 217 | 0.031596  | -0.008422 | -0.004649 | 0.000786  | -0.000212 | 0.000917  | 0.001052  | -0.000486 | 0.000974  | -0.010403 | 0.001417  | 0.020623  |
| 218 | 0.000100  | -0.001010 | 0.000473  | 0.000285  | -0.000384 | 0.000261  | 0.000105  | -0.000215 | -0.000023 | 0.000156  | 0.000409  | -0.000814 |
| 219 | 0.001557  | 0.001100  | -0.000430 | -0.000069 | 0.000185  | 0.000001  | -0.000029 | 0.000248  | -0.000054 | 0.000099  | 0.000883  | -0.000627 |
| 220 | 0.000407  | 0.000473  | -0.000137 | -0.000084 | 0.000274  | -0.000085 | -0.000090 | 0.000266  | -0.000067 | 0.000327  | 0.000202  | -0.000750 |
| 221 | 0.001668  | 0.001159  | -0.000616 | -0.000057 | 0.000186  | -0.000030 | -0.000028 | 0.000269  | 0.000016  | -0.000144 | 0.001166  | -0.000744 |
| 222 | -0.002373 | 0.001833  | 0.000193  | 0.000068  | -0.000187 | 0.000131  | 0.000341  | -0.000361 | 0.000215  | -0.000968 | 0.002178  | -0.000437 |
| 223 | 0.001841  | -0.011567 | 0.030020  | -0.003351 | 0.004115  | 0.006148  | 0.000406  | 0.000030  | 0.000946  | 0.001243  | -0.000063 | 0.001031  |
| 224 | 0.002988  | -0.002304 | -0.006630 | 0.006057  | 0.002817  | -0.006644 | 0.000690  | -0.000240 | 0.000417  | -0.000315 | 0.000667  | -0.000670 |
| 225 | -0.001201 | -0.000960 | 0.008905  | -0.008090 | 0.000415  | 0.003862  | -0.000624 | 0.000518  | -0.000259 | 0.000345  | -0.000316 | 0.000890  |
| 226 | 0.001065  | 0.000032  | -0.010114 | 0.003922  | -0.001559 | -0.002381 | 0.000658  | -0.000355 | 0.000286  | -0.000310 | 0.000590  | -0.000746 |
| 227 | 0.001079  | -0.003726 | 0.015270  | -0.009828 | 0.004290  | 0.000784  | -0.000783 | 0.000770  | -0.000148 | 0.000494  | -0.000209 | 0.000448  |
| 228 | 0.002335  | -0.005320 | -0.006638 | 0.022969  | 0.001066  | -0.009414 | 0.001084  | -0.000502 | 0.001099  | 0.000789  | -0.000074 | 0.000736  |
| 229 | 0.000498  | 0.000314  | -0.000616 | -0.000741 | 0.000451  | 0.000211  | -0.000041 | -0.000183 | 0.000107  | 0.000336  | -0.000307 | 0.000202  |
| 230 | 0.000440  | -0.000394 | 0.001750  | -0.000672 | 0.000808  | 0.000129  | -0.000094 | 0.000224  | 0.000016  | 0.000011  | 0.000300  | -0.000034 |
| 231 | 0.000136  | -0.000171 | 0.000335  | -0.000745 | 0.000198  | 0.000330  | -0.000111 | 0.000249  | -0.000119 | -0.000105 | 0.000284  | -0.000077 |
| 232 | 0.000382  | -0.000602 | 0.001392  | -0.000764 | 0.001107  | -0.000226 | -0.000060 | 0.000170  | -0.000018 | -0.000032 | 0.000208  | -0.000028 |
| 233 | 0.000168  | -0.000009 | 0.001995  | -0.000353 | 0.002174  | -0.000468 | 0.000236  | -0.000352 | 0.000344  | 0.000159  | -0.000177 | 0.000046  |
| 234 | -0.001940 | 0.000383  | 0.002889  | -0.012726 | 0.008592  | 0.015593  | -0.009320 | 0.007381  | 0.004541  | 0.000746  | -0.000132 | 0.000524  |
| 235 | 0.001365  | -0.001631 | 0.005027  | 0.002051  | 0.006324  | -0.002591 | 0.033989  | 0.006964  | -0.024304 | -0.000166 | -0.000042 | 0.000858  |
| 236 | 0.000551  | -0.000487 | -0.001813 | 0.003924  | -0.004484 | -0.003322 | -0.000182 | -0.004011 | 0.005007  | 0.000149  | -0.000200 | 0.000009  |
| 237 | 0.000468  | 0.000060  | -0.001754 | 0.002874  | -0.003990 | -0.001934 | -0.008179 | -0.004744 | 0.007148  | -0.000375 | 0.000509  | -0.000367 |
| 238 | -0.000302 | 0.000292  | -0.000230 | 0.000171  | 0.000431  | -0.000744 | -0.001764 | 0.000861  | -0.000929 | -0.000078 | 0.000023  | -0.000057 |
| 239 | -0.000277 | 0.000356  | -0.000713 | 0.000700  | -0.000728 | -0.000729 | -0.000938 | -0.000504 | -0.000571 | -0.000081 | -0.000093 | -0.000142 |
| 240 | 0.000199  | 0.000124  | 0.000669  | -0.001591 | 0.001301  | 0.000071  | 0.000612  | 0.001075  | -0.002227 | -0.000161 | 0.000118  | -0.000158 |
| 241 | 0.000202  | 0.000117  | 0.000645  | -0.001518 | 0.001148  | -0.000070 | 0.000752  | 0.001312  | -0.002336 | -0.000139 | 0.000134  | -0.000141 |
| 242 | 0.000290  | -0.000164 | -0.000098 | -0.000483 | -0.000786 | -0.000469 | -0.001616 | -0.000839 | 0.001488  | -0.000038 | -0.000040 | 0.000007  |
| 243 | 0.000208  | -0.000273 | 0.000421  | -0.000815 | 0.000595  | -0.001182 | -0.001765 | 0.000234  | 0.000905  | 0.000003  | -0.000009 | 0.000097  |
| 244 | -0.000198 | 0.000639  | -0.002246 | 0.003469  | -0.004374 | -0.003397 | -0.005426 | -0.003494 | 0.005221  | 0.000095  | 0.000029  | -0.000300 |
| 245 | -0.000562 | 0.000584  | -0.002806 | 0.003864  | -0.004043 | -0.001112 | -0.006313 | -0.004225 | 0.006178  | 0.000041  | -0.000295 | -0.000327 |
| 246 | -0.011230 | 0.004061  | -0.000487 | 0.001386  | 0.000216  | -0.000401 | 0.003110  | 0.007578  | -0.005412 | 0.015367  | 0.007532  | -0.012076 |
| 247 | -0.005135 | 0.003930  | -0.000192 | 0.000051  | -0.000318 | 0.001058  | -0.019793 | 0.007262  | 0.023335  | -0.002744 | 0.007594  | 0.000956  |
| 248 | 0.005150  | -0.002398 | 0.000129  | -0.000250 | -0.000416 | 0.000388  | 0.004310  | -0.004525 | -0.002037 | -0.002966 | -0.003974 | 0.004115  |
| 249 | 0.003756  | -0.001936 | 0.000230  | -0.000634 | 0.000444  | -0.000001 | 0.005907  | -0.005029 | -0.005193 | -0.001870 | -0.003762 | 0.003198  |
| 250 | 0.000230  | 0.000041  | -0.000137 | 0.000087  | 0.000047  | -0.000278 | -0.000817 | 0.001131  | -0.001079 | -0.001157 | 0.000216  | 0.000151  |
| 251 | 0.000853  | -0.000476 | -0.000126 | 0.000047  | -0.000013 | -0.000277 | -0.000399 | -0.000267 | -0.000247 | -0.001069 | -0.001018 | 0.000741  |
| 252 | -0.000800 | 0.000610  | 0.000194  | -0.000143 | 0.000142  | -0.000121 | -0.001915 | 0.001023  | 0.000469  | 0.000244  | 0.001160  | -0.001810 |
| 253 | -0.000764 | 0.000565  | 0.000183  | -0.000114 | 0.000130  | -0.000143 | -0.002026 | 0.001224  | 0.000631  | 0.000155  | 0.001036  | -0.001771 |
| 254 | 0.001000  | -0.000107 | -0.000017 | -0.000149 | -0.000027 | 0.000157  | 0.001352  | -0.000886 | -0.001549 | -0.000505 | -0.000610 | -0.000241 |
| 255 | 0.000618  | 0.000464  | -0.000060 | -0.000071 | 0.000050  | 0.000214  | 0.000768  | 0.000271  | -0.001693 | -0.001194 | 0.000720  | -0.000611 |
| 256 | 0.003053  | -0.002175 | 0.000097  | -0.000103 | 0.000049  | -0.000279 | 0.004290  | -0.003514 | -0.003248 | -0.003488 | -0.004603 | 0.003437  |
| 257 | 0.003250  | -0.002590 | 0.000190  | -0.000102 | -0.000299 | -0.000322 | 0.005364  | -0.004259 | -0.004164 | -0.000623 | -0.004302 | 0.003813  |
| 258 | 0.053561  | -0.007899 | -0.005551 | -0.000179 | -0.000277 | 0.000995  | 0.000622  | 0.000316  | 0.000503  | -0.018989 | 0.006844  | 0.023489  |

|     |           |           |           |           |           |           |           |           |           |           |           |           |
|-----|-----------|-----------|-----------|-----------|-----------|-----------|-----------|-----------|-----------|-----------|-----------|-----------|
| 259 | -0.006503 | 0.042180  | -0.010913 | 0.000606  | 0.000391  | 0.000421  | 0.000498  | -0.000175 | -0.000111 | 0.003001  | 0.007837  | -0.005770 |
| 260 | -0.016543 | -0.005329 | 0.003219  | 0.000463  | -0.000367 | -0.000143 | -0.000196 | -0.000455 | -0.000136 | 0.005022  | -0.004305 | -0.004185 |
| 261 | -0.013000 | -0.007589 | 0.003235  | 0.000107  | 0.000247  | -0.000396 | -0.000108 | -0.000058 | 0.000052  | 0.004144  | -0.003413 | -0.002791 |
| 262 | -0.000037 | -0.000714 | 0.000554  | -0.000305 | 0.000109  | -0.000053 | -0.000010 | 0.000053  | 0.000057  | 0.000764  | 0.000295  | -0.001752 |
| 263 | -0.001904 | -0.001994 | 0.000946  | -0.000303 | -0.000007 | -0.000094 | -0.000056 | 0.000013  | 0.000028  | 0.001370  | -0.000822 | -0.001600 |
| 264 | 0.003724  | 0.002830  | -0.000645 | -0.000148 | 0.000116  | -0.000089 | -0.000121 | 0.000123  | -0.000146 | -0.001929 | 0.001243  | 0.000453  |
| 265 | 0.003635  | 0.002718  | -0.000708 | -0.000170 | 0.000110  | -0.000108 | -0.000150 | 0.000108  | -0.000143 | -0.001839 | 0.001029  | 0.000275  |
| 266 | -0.001517 | -0.001964 | 0.000842  | 0.000145  | -0.000109 | -0.000086 | -0.000034 | -0.000060 | -0.000116 | -0.000509 | -0.000272 | -0.000012 |
| 267 | -0.000284 | -0.000035 | 0.000207  | 0.000155  | -0.000060 | -0.000001 | 0.000017  | 0.000050  | -0.000081 | -0.000818 | 0.001132  | -0.000759 |
| 268 | -0.012053 | -0.010300 | 0.003621  | -0.000184 | 0.000109  | -0.000286 | -0.000446 | 0.000372  | -0.000179 | 0.005491  | -0.005141 | -0.005237 |
| 269 | -0.009311 | -0.011709 | 0.005186  | -0.000186 | -0.000260 | -0.000167 | -0.000013 | -0.000284 | 0.000268  | 0.004384  | -0.004422 | -0.002216 |
| 270 | 0.004610  | -0.005559 | -0.011432 | 0.030093  | 0.006912  | -0.022226 | -0.000003 | -0.000237 | 0.000377  | 0.000841  | -0.000389 | -0.000091 |
| 271 | 0.003695  | -0.011245 | 0.046385  | -0.007951 | 0.008078  | 0.004867  | 0.000815  | 0.000084  | 0.001038  | 0.000391  | 0.000229  | 0.000682  |
| 272 | -0.003047 | 0.003133  | -0.003483 | -0.005792 | -0.004525 | 0.005656  | -0.000136 | -0.000360 | -0.000139 | -0.000069 | -0.000297 | 0.000412  |
| 273 | -0.002539 | 0.003094  | -0.007069 | -0.004850 | -0.003644 | 0.004878  | -0.000056 | 0.000047  | -0.000241 | -0.000444 | 0.000397  | -0.000057 |
| 274 | 0.000767  | 0.000793  | -0.001988 | -0.001421 | 0.000351  | 0.000639  | 0.000035  | 0.000062  | 0.000000  | -0.000014 | 0.000126  | -0.000259 |
| 275 | 0.000184  | 0.001071  | -0.003748 | -0.001302 | -0.000660 | 0.001216  | 0.000014  | 0.000034  | -0.000100 | -0.000032 | -0.000018 | -0.000288 |
| 276 | 0.000692  | -0.000638 | 0.001422  | 0.000837  | 0.001585  | -0.002195 | -0.000052 | 0.000170  | -0.000146 | -0.000168 | 0.000040  | -0.000159 |
| 277 | 0.000691  | -0.000647 | 0.001782  | 0.000635  | 0.001289  | -0.002088 | -0.000079 | 0.000172  | -0.000131 | -0.000156 | 0.000060  | -0.000165 |
| 278 | -0.000963 | 0.000964  | 0.000779  | -0.000938 | -0.000809 | -0.000550 | -0.000167 | -0.000180 | -0.000033 | -0.000071 | -0.000069 | 0.000143  |
| 279 | -0.000450 | 0.000294  | 0.002833  | -0.001730 | 0.000595  | -0.000909 | -0.000161 | -0.000117 | 0.000033  | 0.000011  | -0.000019 | 0.000196  |
| 280 | -0.001694 | 0.003700  | -0.011228 | -0.007335 | -0.004896 | 0.006290  | -0.000355 | 0.000563  | -0.000492 | -0.000165 | 0.000199  | -0.000197 |
| 281 | -0.001952 | 0.005036  | -0.014030 | -0.000409 | -0.004270 | 0.004530  | 0.000133  | -0.000233 | -0.000165 | -0.000130 | -0.000255 | -0.000212 |
| 282 | 0.000205  | -0.000126 | 0.001520  | 0.020262  | 0.000631  | -0.028037 | 0.035317  | -0.002103 | -0.027962 | 0.000692  | -0.000207 | -0.001119 |
| 283 | 0.000281  | -0.000348 | 0.000576  | -0.002147 | -0.000801 | 0.000599  | -0.002235 | 0.000697  | 0.002109  | 0.000411  | 0.000129  | -0.000013 |
| 284 | -0.000234 | -0.000137 | 0.000361  | -0.001085 | 0.001262  | 0.000351  | -0.002631 | -0.000093 | 0.001180  | -0.000072 | 0.000026  | 0.000211  |
| 285 | 0.000030  | -0.000108 | 0.000126  | -0.002732 | 0.000692  | 0.002651  | -0.003708 | -0.000263 | 0.003571  | 0.000045  | 0.000091  | 0.000088  |
| 286 | 0.000138  | 0.000168  | -0.000282 | -0.000780 | 0.000314  | 0.001873  | -0.000630 | -0.001045 | 0.001584  | -0.000168 | 0.000078  | -0.000077 |
| 287 | -0.000174 | 0.000178  | -0.000303 | 0.002390  | 0.000756  | -0.002403 | -0.002029 | -0.000535 | -0.000161 | -0.000508 | 0.000354  | 0.000021  |
| 288 | 0.007438  | 0.000850  | -0.000003 | -0.001060 | -0.000042 | 0.000148  | -0.025590 | -0.002317 | 0.031487  | -0.026861 | 0.000894  | 0.019560  |
| 289 | -0.001726 | 0.000544  | -0.000245 | -0.000032 | 0.000120  | 0.000336  | 0.002215  | 0.000571  | -0.001966 | 0.000625  | -0.000775 | -0.002512 |
| 290 | -0.000687 | 0.000266  | -0.000057 | 0.000186  | 0.000012  | -0.000051 | 0.001012  | -0.000229 | -0.002475 | 0.000467  | 0.001279  | -0.000952 |
| 291 | -0.001074 | 0.000105  | -0.000102 | 0.000052  | 0.000047  | 0.000018  | 0.003237  | -0.000392 | -0.003149 | 0.002928  | 0.000635  | -0.002819 |
| 292 | 0.000421  | -0.000195 | 0.000105  | -0.000078 | 0.000080  | -0.000146 | 0.001655  | -0.000957 | -0.000488 | 0.001739  | 0.000283  | -0.000630 |
| 293 | 0.002172  | -0.000233 | 0.000243  | 0.000007  | 0.000221  | -0.000430 | -0.001149 | -0.000658 | 0.000287  | -0.002386 | 0.000612  | 0.002234  |
| 294 | 0.064496  | -0.060137 | 0.006845  | -0.000461 | -0.000398 | 0.000792  | -0.001334 | -0.000040 | 0.000195  | -0.023923 | -0.002163 | 0.028897  |
| 295 | -0.005794 | 0.006492  | -0.002248 | -0.000391 | -0.000052 | -0.000019 | -0.000057 | -0.000219 | 0.000416  | 0.001503  | 0.000587  | -0.000799 |
| 296 | -0.001020 | -0.000290 | 0.000441  | 0.000039  | -0.000018 | -0.000141 | -0.000052 | 0.000083  | -0.000136 | 0.001427  | -0.000884 | -0.000126 |
| 297 | -0.006181 | 0.005985  | -0.001034 | 0.000036  | -0.000035 | -0.000009 | 0.000069  | 0.000023  | 0.000036  | 0.002992  | -0.000442 | -0.002736 |
| 298 | -0.001283 | 0.001980  | -0.000650 | 0.000273  | -0.000027 | 0.000145  | 0.000221  | 0.000004  | -0.000062 | 0.000901  | -0.000247 | 0.002346  |
| 299 | 0.006090  | -0.005375 | 0.001466  | 0.000520  | -0.000172 | 0.000081  | 0.000131  | -0.000113 | -0.000294 | -0.002044 | -0.000610 | 0.001931  |
| 300 | 0.000542  | 0.008620  | -0.070819 | 0.034210  | -0.002242 | -0.026020 | 0.000937  | 0.000068  | -0.000758 | 0.000912  | -0.000459 | -0.000399 |
| 301 | 0.000034  | -0.002191 | 0.005943  | 0.002435  | 0.000372  | 0.000221  | 0.000502  | -0.000269 | 0.000027  | -0.000014 | -0.000145 | -0.000311 |
| 302 | -0.000155 | 0.000406  | 0.000477  | -0.000809 | -0.001029 | 0.001566  | -0.000220 | 0.000047  | -0.000135 | -0.000188 | 0.000018  | 0.000030  |
| 303 | 0.000095  | -0.001178 | 0.007077  | -0.003747 | -0.000467 | 0.003400  | 0.000001  | 0.000002  | 0.000049  | -0.000028 | 0.000001  | 0.000001  |
| 304 | 0.000388  | -0.000865 | 0.002346  | -0.002615 | -0.000151 | 0.001113  | -0.000079 | -0.000031 | 0.000173  | 0.000143  | -0.000030 | 0.000200  |
| 305 | -0.000233 | 0.001232  | -0.005303 | 0.002343  | -0.000528 | -0.002161 | -0.000450 | -0.000157 | -0.000029 | 0.000033  | -0.000194 | 0.000454  |
| 306 | -0.001640 | -0.002403 | -0.000850 | 0.039010  | 0.006329  | -0.035071 | -0.057879 | 0.008416  | 0.058379  | 0.001578  | 0.004967  | 0.001466  |
| 307 | 0.000614  | -0.000483 | 0.001356  | -0.000466 | 0.003314  | -0.002882 | 0.002296  | -0.003587 | 0.001122  | 0.000835  | 0.000042  | -0.000222 |
| 308 | -0.000398 | -0.000055 | 0.000204  | 0.003328  | -0.000676 | -0.004588 | 0.005007  | 0.001877  | -0.005768 | -0.000103 | 0.000003  | -0.000019 |

|     |           |           |           |           |           |           |           |           |           |           |           |           |
|-----|-----------|-----------|-----------|-----------|-----------|-----------|-----------|-----------|-----------|-----------|-----------|-----------|
| 309 | 0.000134  | 0.000059  | -0.000044 | 0.002285  | -0.000389 | -0.002571 | 0.004837  | -0.000508 | -0.003264 | 0.000051  | -0.000195 | -0.000084 |
| 310 | 0.000003  | 0.000163  | -0.000332 | -0.002214 | -0.000169 | 0.003622  | -0.003409 | -0.000207 | 0.003013  | -0.000063 | 0.000087  | -0.000073 |
| 311 | -0.000162 | -0.000470 | 0.000759  | -0.003772 | 0.002358  | 0.002613  | -0.006650 | 0.000010  | 0.004950  | 0.000238  | -0.000094 | 0.000499  |
| 312 | -0.000191 | 0.000780  | -0.001926 | 0.000991  | -0.004430 | 0.003586  | -0.001823 | 0.002409  | -0.000272 | -0.000955 | 0.000156  | -0.000105 |
| 313 | 0.002102  | -0.000913 | -0.001112 | 0.001132  | 0.004231  | 0.001186  | 0.050062  | 0.005532  | -0.046082 | -0.032456 | 0.005101  | 0.034868  |
| 314 | -0.000903 | 0.001237  | -0.000567 | -0.000307 | 0.000063  | 0.000569  | 0.001403  | -0.003709 | 0.002890  | -0.001690 | 0.003026  | -0.001041 |
| 315 | 0.001013  | 0.000034  | 0.000108  | -0.000014 | 0.000009  | -0.000163 | -0.005393 | 0.001693  | 0.003705  | -0.004548 | -0.000464 | 0.003342  |
| 316 | 0.000911  | -0.000123 | 0.000037  | -0.000029 | -0.000130 | 0.000072  | -0.002781 | -0.000377 | 0.003983  | -0.002727 | -0.000315 | 0.002378  |
| 317 | -0.000804 | -0.000215 | 0.000052  | -0.000096 | 0.000063  | -0.000076 | 0.002795  | -0.000185 | -0.002992 | 0.003661  | -0.000220 | -0.002222 |
| 318 | -0.002121 | 0.000724  | -0.000382 | 0.000435  | -0.000110 | 0.000284  | 0.004424  | -0.000115 | -0.005946 | 0.002934  | 0.002193  | -0.003671 |
| 319 | 0.001928  | -0.001652 | 0.000750  | 0.000007  | 0.000105  | -0.000679 | -0.000552 | 0.002687  | -0.001537 | 0.002257  | -0.004214 | 0.001291  |
| 320 | 0.033892  | 0.005270  | -0.003353 | -0.001053 | -0.003829 | -0.000715 | -0.000958 | -0.003969 | -0.001120 | -0.048180 | -0.006505 | 0.043319  |
| 321 | 0.004506  | -0.003058 | -0.001936 | -0.000482 | -0.000059 | 0.000302  | -0.000066 | -0.000160 | 0.000736  | 0.000553  | -0.002745 | 0.001771  |
| 322 | 0.010177  | -0.010210 | 0.001952  | -0.000027 | -0.000122 | -0.000061 | -0.000505 | 0.000133  | -0.000287 | -0.004139 | 0.000201  | 0.005443  |
| 323 | 0.005968  | -0.005740 | 0.000863  | -0.000050 | 0.000091  | 0.000019  | 0.000096  | -0.000053 | 0.000047  | -0.002634 | 0.000188  | 0.002643  |
| 324 | -0.006395 | 0.006045  | -0.000843 | 0.000119  | -0.000047 | 0.000113  | 0.000033  | 0.000107  | -0.000046 | 0.002559  | 0.000374  | -0.003652 |
| 325 | -0.009226 | 0.007697  | -0.000927 | -0.000324 | 0.000167  | -0.000407 | 0.000044  | -0.000002 | 0.000170  | 0.004867  | -0.001655 | -0.002723 |
| 326 | -0.005432 | 0.005666  | 0.000854  | 0.000765  | -0.000028 | 0.000026  | 0.000402  | -0.000025 | -0.000623 | -0.001054 | 0.003655  | -0.003641 |
| 327 | 0.001454  | -0.003725 | 0.010421  | 0.055770  | -0.007751 | -0.054471 | -0.001466 | -0.004664 | -0.001293 | -0.001253 | -0.004584 | -0.001368 |
| 328 | 0.001178  | -0.001917 | -0.002621 | 0.001426  | -0.003002 | 0.000628  | 0.000957  | -0.000219 | 0.000132  | 0.000291  | -0.000031 | -0.000507 |
| 329 | -0.000735 | 0.002489  | -0.012102 | 0.006486  | 0.000100  | -0.004704 | -0.000237 | 0.000158  | -0.000415 | -0.000053 | -0.000133 | 0.000052  |
| 330 | 0.000367  | 0.000936  | -0.007514 | 0.003387  | 0.000330  | -0.002799 | 0.000126  | -0.000009 | 0.000076  | 0.000045  | 0.000078  | -0.000092 |
| 331 | -0.000026 | -0.000989 | 0.007520  | -0.004851 | 0.000362  | 0.003022  | -0.000067 | 0.000083  | 0.000063  | 0.000117  | -0.000011 | 0.000122  |
| 332 | -0.000146 | -0.001090 | 0.010633  | -0.005175 | -0.001899 | 0.005599  | 0.000007  | -0.000017 | -0.000045 | -0.000479 | 0.000220  | -0.000295 |
| 333 | -0.000649 | 0.000548  | 0.004414  | -0.001416 | 0.004110  | -0.001615 | -0.000788 | 0.000002  | 0.000189  | 0.000070  | -0.000122 | 0.000721  |

|    | 25        | 26        | 27        | 28        | 29        | 30        | 31        | 32        | 33        | 34        | 35        | 36        |
|----|-----------|-----------|-----------|-----------|-----------|-----------|-----------|-----------|-----------|-----------|-----------|-----------|
| 1  | -0.008719 | 0.004977  | -0.008075 | 0.023636  | 0.024965  | 0.021578  | 0.007630  | 0.002820  | 0.002071  | 0.006799  | 0.020614  | 0.000440  |
| 2  | 0.025095  | 0.010326  | 0.018736  | 0.030066  | 0.030910  | 0.027384  | 0.027752  | 0.042103  | 0.041104  | 0.026728  | 0.027265  | 0.002604  |
| 3  | 0.177032  | 0.191805  | -0.272895 | 0.510921  | 0.081472  | 0.105811  | 0.076935  | 0.076867  | 0.098559  | 0.094166  | 0.516326  | -0.029619 |
| 4  | 0.009260  | 0.011651  | 0.011277  | 0.089939  | 0.519908  | 0.515233  | 0.095160  | 0.099603  | 0.076773  | 0.076549  | 0.098960  | -0.009442 |
| 5  | -0.271665 | 0.195118  | 0.176222  | 0.076878  | 0.107967  | 0.106543  | 0.528958  | 0.518304  | 0.102009  | 0.106536  | 0.072872  | -0.004857 |
| 6  | 0.021131  | 0.203947  | 0.038636  | 0.102398  | 0.077014  | 0.074929  | 0.106496  | 0.101124  | 0.517691  | 0.531191  | 0.103746  | 0.021448  |
| 7  | 0.010939  | -0.006991 | 0.012204  | 0.015966  | 0.015144  | 0.013559  | 0.017534  | 0.015404  | 0.015635  | 0.019089  | 0.014462  | 0.000468  |
| 8  | 0.211030  | 0.014040  | -0.216766 | -0.235796 | 0.205157  | 0.026808  | -0.016073 | 0.026966  | -0.023667 | -0.497671 | 1.016150  | -0.061227 |
| 9  | -0.038744 | 0.058600  | -0.028809 | 0.995753  | -0.499957 | -0.024577 | 0.026845  | -0.018252 | 0.019622  | 0.204520  | -0.243720 | 0.009679  |
| 10 | -0.010883 | 0.008256  | -0.008191 | -0.492725 | 1.040100  | -0.262330 | 0.209559  | 0.021429  | -0.018180 | 0.030092  | -0.032354 | -0.001339 |
| 11 | -0.006344 | 0.005766  | -0.008589 | 0.210607  | -0.259401 | 1.032020  | -0.503115 | -0.025207 | 0.027435  | -0.019335 | 0.027602  | -0.002145 |
| 12 | -0.030261 | 0.060483  | -0.036411 | 0.023501  | -0.025202 | -0.499327 | 1.008260  | -0.242175 | 0.207870  | 0.024051  | -0.017401 | -0.000091 |
| 13 | -0.211854 | 0.019934  | 0.204740  | -0.015127 | 0.024110  | 0.208788  | -0.241757 | 1.016380  | -0.475244 | -0.021795 | 0.027338  | -0.001109 |
| 14 | 1.376340  | 1.405160  | -0.020544 | 0.025940  | -0.020827 | 0.027521  | -0.024435 | -0.491445 | 1.008320  | -0.249968 | 0.209868  | -0.001397 |
| 15 | -0.033647 | 1.401380  | 1.385640  | -0.031633 | 0.027035  | -0.019487 | 0.022350  | 0.206901  | -0.251947 | 1.019980  | -0.500816 | 0.027713  |
| 16 | 0.007140  | -0.047414 | 0.031032  | -0.320290 | -0.113093 | 0.017755  | -0.007269 | -0.044681 | 0.013443  | -0.198720 | 0.886431  | -0.045481 |
| 17 | -0.026441 | -0.047894 | -0.048220 | -0.401852 | -0.182030 | -0.092671 | -0.051473 | -0.048979 | -0.090666 | -0.185487 | -0.409663 | 0.062061  |
| 18 | 0.041683  | -0.027230 | 0.007490  | 0.877816  | -0.194224 | 0.013726  | -0.045377 | -0.008888 | 0.018631  | -0.109442 | -0.327363 | 0.063565  |
| 19 | 0.022080  | -0.025303 | 0.020522  | -0.188365 | 0.888805  | -0.336830 | -0.107229 | 0.019365  | -0.007706 | -0.043482 | 0.011502  | 0.001572  |
| 20 | -0.024634 | -0.004412 | -0.026125 | -0.188464 | -0.407201 | -0.406961 | -0.189833 | -0.089513 | -0.050128 | -0.054982 | -0.090482 | 0.001759  |
| 21 | 0.020393  | -0.025097 | 0.020980  | -0.108435 | -0.340657 | 0.884647  | -0.192595 | 0.011381  | -0.045232 | -0.005327 | 0.017860  | 0.000438  |
| 22 | 0.006354  | -0.027781 | 0.039783  | -0.046624 | 0.011653  | -0.197276 | 0.890494  | -0.328790 | -0.114035 | 0.017539  | -0.010519 | 0.000833  |

|    |           |           |           |           |           |           |           |           |           |           |           |           |
|----|-----------|-----------|-----------|-----------|-----------|-----------|-----------|-----------|-----------|-----------|-----------|-----------|
| 23 | -0.045821 | -0.051397 | -0.028331 | -0.052910 | -0.094811 | -0.191874 | -0.414700 | -0.414308 | -0.193835 | -0.094356 | -0.052323 | 0.001464  |
| 24 | 0.029990  | -0.045639 | 0.005958  | -0.007346 | 0.021275  | -0.110432 | -0.326513 | 0.882799  | -0.189877 | 0.012996  | -0.043534 | 0.001017  |
| 25 | 5.979500  | 0.000540  | -1.127610 | 0.017223  | -0.003876 | -0.043114 | 0.013821  | -0.183460 | 0.875628  | -0.331061 | -0.108828 | 0.001020  |
| 26 | 0.000540  | 5.766310  | 0.002667  | -0.090289 | -0.054710 | -0.052594 | -0.092577 | -0.191337 | -0.404392 | -0.409367 | -0.189749 | 0.003754  |
| 27 | -1.127610 | 0.002667  | 5.957200  | 0.009072  | -0.043885 | -0.010039 | 0.016916  | -0.112696 | -0.326283 | 0.887883  | -0.193944 | 0.001879  |
| 28 | 0.017223  | -0.090289 | 0.009072  | 5.931700  | -0.361006 | -0.183207 | -0.158669 | -0.097177 | -0.217364 | -0.166958 | -0.176836 | 0.014530  |
| 29 | -0.003876 | -0.054710 | -0.043885 | -0.361006 | 5.970530  | -0.166667 | -0.183923 | -0.216693 | -0.097194 | -0.172789 | -0.167319 | 0.005953  |
| 30 | -0.043114 | -0.052594 | -0.010039 | -0.183207 | -0.166667 | 5.986610  | -0.359588 | -0.169275 | -0.159975 | -0.100607 | -0.219811 | 0.003628  |
| 31 | 0.013821  | -0.092577 | 0.016916  | -0.158669 | -0.183923 | -0.359588 | 5.973410  | -0.174617 | -0.174664 | -0.219870 | -0.097943 | 0.002750  |
| 32 | -0.183460 | -0.191337 | -0.112696 | -0.097177 | -0.216693 | -0.169275 | -0.174617 | 5.997610  | -0.350329 | -0.184418 | -0.152527 | 0.004677  |
| 33 | 0.875628  | -0.404392 | -0.326283 | -0.217364 | -0.097194 | -0.159975 | -0.174664 | -0.350329 | 5.970020  | -0.162876 | -0.176073 | 0.004665  |
| 34 | -0.331061 | -0.409367 | 0.887883  | -0.166958 | -0.172789 | -0.100607 | -0.219870 | -0.184418 | -0.162876 | 5.979700  | -0.363137 | 0.013683  |
| 35 | -0.108828 | -0.189749 | -0.193944 | -0.176836 | -0.167319 | -0.219811 | -0.097943 | -0.152527 | -0.176073 | -0.363137 | 5.967050  | -0.052794 |
| 36 | 0.001020  | 0.003754  | 0.001879  | 0.014530  | 0.005953  | 0.003628  | 0.002750  | 0.004677  | 0.004665  | 0.013683  | -0.052794 | 5.531820  |
| 37 | 0.000352  | 0.001830  | 0.001617  | -0.049442 | 0.012792  | 0.004200  | 0.004490  | 0.002474  | 0.003642  | 0.006126  | 0.014717  | 0.004875  |
| 38 | 0.000788  | 0.001556  | 0.000904  | 0.014370  | -0.056186 | 0.014559  | 0.006117  | 0.003567  | 0.002869  | 0.004987  | 0.005208  | 0.000093  |
| 39 | 0.000934  | 0.001413  | 0.000836  | 0.006643  | 0.015315  | -0.053374 | 0.013042  | 0.004274  | 0.004749  | 0.002656  | 0.003994  | 0.000100  |
| 40 | 0.001645  | 0.001957  | 0.000316  | 0.004636  | 0.004020  | 0.012305  | -0.049578 | 0.015153  | 0.006529  | 0.003776  | 0.002551  | 0.000073  |
| 41 | 0.001700  | 0.003394  | 0.000932  | 0.002458  | 0.003808  | 0.006337  | 0.015305  | -0.053011 | 0.012700  | 0.004165  | 0.004601  | 0.000054  |
| 42 | -0.043634 | 0.062434  | 0.062606  | 0.003558  | 0.002357  | 0.004418  | 0.003817  | 0.012074  | -0.047857 | 0.014751  | 0.006086  | 0.000085  |
| 43 | 0.065183  | 0.063438  | -0.046544 | 0.004385  | 0.004588  | 0.002634  | 0.003737  | 0.006566  | 0.014857  | -0.053180 | 0.013126  | 0.000186  |
| 44 | 0.001078  | -0.005024 | -0.000330 | 0.254187  | 0.267083  | 0.001202  | -0.019676 | -0.007345 | -0.007520 | -0.019259 | 0.002291  | -0.000355 |
| 45 | -0.000315 | -0.004677 | 0.000966  | -0.019325 | 0.002009  | 0.256373  | 0.251817  | 0.003147  | -0.018841 | -0.006963 | -0.007490 | 0.000033  |
| 46 | 0.002989  | 0.003520  | -0.020122 | -0.007222 | -0.006836 | -0.018733 | 0.002566  | 0.256325  | 0.252683  | 0.002284  | -0.019056 | 0.000052  |
| 47 | -0.022460 | 0.002686  | 0.003709  | 0.002221  | -0.019338 | -0.007647 | -0.007702 | -0.019248 | 0.001202  | 0.257131  | 0.265066  | -0.004282 |
| 48 | 0.001271  | -0.000033 | 0.001259  | 0.005201  | 0.003903  | 0.003967  | 0.002031  | -0.002909 | 0.003773  | 0.001135  | 0.001548  | -0.000049 |
| 49 | 0.001289  | 0.001309  | 0.002044  | -0.001438 | -0.000508 | 0.001591  | 0.001423  | 0.000298  | 0.001857  | 0.003726  | 0.002089  | 0.000225  |
| 50 | -0.006875 | 0.008142  | -0.005244 | -0.013279 | -0.009215 | -0.000025 | -0.006990 | -0.005440 | -0.002546 | 0.000977  | -0.002363 | 0.000068  |
| 51 | 0.003578  | -0.002443 | 0.004248  | -0.001186 | 0.000692  | 0.002714  | 0.002265  | 0.001879  | 0.002437  | 0.002579  | 0.003651  | 0.000889  |
| 52 | 0.000155  | -0.002634 | 0.001178  | 0.004913  | 0.012457  | 0.001523  | 0.004537  | -0.001194 | -0.001670 | 0.003550  | 0.000526  | -0.000796 |
| 53 | -0.000153 | 0.002051  | -0.000557 | 0.000462  | -0.000009 | 0.002445  | 0.000495  | -0.004373 | 0.001122  | 0.000543  | -0.000147 | 0.000016  |
| 54 | 0.000337  | -0.000034 | 0.000362  | 0.000220  | 0.000251  | 0.000361  | 0.000478  | 0.000253  | 0.000280  | 0.000333  | 0.000229  | 0.000056  |
| 55 | 0.000026  | 0.000674  | 0.000069  | 0.000967  | 0.000854  | 0.000423  | 0.000926  | 0.001033  | 0.000807  | 0.001230  | 0.001086  | -0.000145 |
| 56 | -0.000686 | 0.001397  | -0.000232 | -0.006977 | 0.001848  | 0.000362  | 0.000458  | 0.000840  | 0.000154  | 0.003613  | 0.000190  | 0.000110  |
| 57 | 0.000055  | -0.000331 | 0.000209  | 0.000114  | 0.000276  | 0.000021  | -0.000112 | -0.000178 | -0.000136 | -0.000058 | 0.000203  | 0.000065  |
| 58 | 0.000174  | -0.000221 | 0.000342  | -0.000057 | -0.000216 | -0.000110 | -0.000169 | -0.000147 | -0.000021 | 0.000201  | 0.000095  | 0.000126  |
| 59 | 0.000282  | -0.000391 | 0.000230  | -0.000161 | 0.000296  | 0.000000  | 0.000006  | -0.000155 | -0.000024 | -0.000123 | -0.000183 | 0.000024  |
| 60 | -0.004910 | 0.001861  | -0.007139 | -0.010906 | -0.010395 | -0.007986 | -0.009496 | -0.000360 | -0.001673 | -0.009327 | -0.008625 | -0.000623 |
| 61 | -0.011664 | 0.016020  | -0.006483 | 0.021159  | 0.017905  | -0.012494 | -0.042780 | 0.015971  | 0.012840  | 0.015604  | -0.014820 | -0.000539 |
| 62 | 0.013490  | -0.019591 | 0.002406  | -0.019070 | -0.005137 | -0.015567 | 0.009728  | 0.003156  | -0.003186 | -0.045549 | -0.024741 | 0.002116  |
| 63 | 0.004126  | -0.004177 | 0.015515  | -0.013187 | -0.032032 | -0.016348 | -0.026812 | 0.023342  | 0.009548  | 0.004326  | -0.018580 | 0.001783  |
| 64 | 0.002668  | -0.003669 | -0.013477 | -0.022580 | 0.008755  | -0.020133 | -0.005020 | 0.035926  | 0.041816  | -0.031042 | -0.028849 | 0.000161  |
| 65 | 0.000741  | 0.006262  | -0.012908 | 0.009994  | 0.016381  | 0.007969  | 0.017153  | -0.014751 | 0.004384  | -0.002787 | 0.025571  | -0.001672 |
| 66 | -0.003963 | 0.008132  | 0.005117  | 0.011773  | -0.013734 | 0.027432  | 0.013498  | -0.024683 | -0.031602 | 0.022793  | 0.016718  | -0.000047 |
| 67 | 0.008102  | -0.003945 | 0.005579  | -0.043216 | -0.030237 | -0.007326 | 0.026991  | 0.000423  | 0.000586  | 0.010798  | 0.033052  | 0.000120  |
| 68 | -0.006008 | 0.015232  | -0.000507 | 0.004607  | -0.013332 | 0.031708  | 0.007313  | 0.010896  | 0.016091  | 0.030095  | 0.011113  | -0.001717 |
| 69 | -0.056778 | -0.161491 | 0.023887  | 0.898454  | 0.906520  | -0.263783 | -0.321234 | -0.306375 | -0.304835 | -0.322555 | -0.263001 | -0.001943 |
| 70 | 0.027544  | -0.161288 | -0.062367 | -0.322708 | -0.269957 | 0.909449  | 0.906137  | -0.267945 | -0.323517 | -0.313508 | -0.307608 | 0.008928  |
| 71 | 0.127032  | 0.162761  | -0.095288 | -0.311442 | -0.319257 | -0.327688 | -0.268792 | 0.893988  | 0.894407  | -0.270268 | -0.325597 | 0.003924  |
| 72 | -0.097869 | 0.162274  | 0.133483  | -0.265847 | -0.320991 | -0.312321 | -0.309948 | -0.322229 | -0.267031 | 0.911610  | 0.903846  | -0.011207 |

|     |           |           |           |           |           |           |           |           |           |           |           |           |
|-----|-----------|-----------|-----------|-----------|-----------|-----------|-----------|-----------|-----------|-----------|-----------|-----------|
| 73  | 0.162278  | 0.265057  | -0.155202 | -0.205517 | 0.235605  | 0.149618  | 0.165872  | 0.115595  | 0.139060  | 0.546681  | 0.996646  | -0.016366 |
| 74  | -0.012699 | -0.059714 | -0.012135 | -0.117038 | -0.222879 | -0.055873 | -0.052929 | -0.062568 | -0.060991 | -0.217524 | 0.267248  | -0.131556 |
| 75  | 0.004350  | -0.055259 | -0.022910 | 0.261148  | -0.212296 | -0.061599 | -0.063723 | -0.052575 | -0.054506 | -0.224990 | -0.116341 | 0.031846  |
| 76  | 0.031766  | 0.079816  | 0.022186  | 0.981820  | 0.531600  | 0.148426  | 0.118871  | 0.162094  | 0.147016  | 0.239424  | -0.208857 | 0.051785  |
| 77  | -0.005777 | 0.046501  | 0.033769  | 0.549459  | 1.005520  | -0.212899 | 0.237433  | 0.148159  | 0.165219  | 0.120894  | 0.141704  | -0.009249 |
| 78  | -0.008400 | -0.016542 | -0.008996 | -0.214996 | 0.270842  | -0.117137 | -0.224607 | -0.054518 | -0.051751 | -0.065133 | -0.062323 | 0.002314  |
| 79  | -0.008063 | -0.016429 | -0.009575 | -0.225113 | -0.118247 | 0.268052  | -0.215742 | -0.060999 | -0.062825 | -0.053149 | -0.056563 | 0.001518  |
| 80  | 0.031415  | 0.044289  | -0.002231 | 0.238113  | -0.219798 | 0.999063  | 0.546348  | 0.137354  | 0.113537  | 0.168380  | 0.148847  | -0.003211 |
| 81  | 0.020179  | 0.081548  | 0.032889  | 0.115917  | 0.144041  | 0.553518  | 1.007390  | -0.204406 | 0.241206  | 0.149062  | 0.164844  | -0.002942 |
| 82  | -0.022645 | -0.056005 | 0.001941  | -0.064523 | -0.063417 | -0.217909 | 0.260194  | -0.123358 | -0.229074 | -0.056089 | -0.054250 | 0.001276  |
| 83  | -0.011056 | -0.060326 | -0.014874 | -0.053074 | -0.056536 | -0.227150 | -0.124012 | 0.259967  | -0.217758 | -0.062386 | -0.064044 | 0.001360  |
| 84  | -0.156206 | 0.269508  | 0.166837  | 0.167374  | 0.151473  | 0.235291  | -0.206914 | 1.001000  | 0.560511  | 0.148135  | 0.116757  | -0.004800 |
| 85  | 0.703108  | -1.127510 | -0.431418 | 0.147488  | 0.166261  | 0.117078  | 0.146806  | 0.550180  | 0.984183  | -0.212562 | 0.233963  | -0.004429 |
| 86  | 0.402409  | -0.594091 | -0.807775 | -0.055803 | -0.052339 | -0.063677 | -0.061407 | -0.212247 | 0.259662  | -0.117315 | -0.224067 | 0.003003  |
| 87  | -0.818840 | -0.594893 | 0.413220  | -0.061774 | -0.064478 | -0.053367 | -0.055923 | -0.225227 | -0.121291 | 0.267409  | -0.214651 | 0.003274  |
| 88  | -0.426141 | -1.122310 | 0.701547  | 0.139929  | 0.116341  | 0.165459  | 0.146308  | 0.231896  | -0.203718 | 1.000390  | 0.548171  | 0.013839  |
| 89  | 0.001150  | -0.021844 | -0.009741 | 0.111606  | 0.116202  | -0.096036 | -0.043332 | -0.046644 | -0.044728 | -0.045025 | -0.092889 | 0.008722  |
| 90  | -0.009092 | -0.022066 | 0.000570  | -0.045486 | -0.096537 | 0.117506  | 0.118297  | -0.097785 | -0.046086 | -0.045716 | -0.045121 | 0.001680  |
| 91  | 0.264000  | -0.160046 | -0.195853 | -0.043684 | -0.045738 | -0.042465 | -0.095012 | 0.119702  | 0.114135  | -0.094943 | -0.042659 | 0.002344  |
| 92  | -0.195262 | -0.158346 | 0.263279  | -0.095077 | -0.045629 | -0.046144 | -0.044325 | -0.045978 | -0.094894 | 0.114895  | 0.114531  | -0.003268 |
| 93  | 0.006936  | 0.030880  | 0.006914  | 0.056636  | 0.115244  | 0.030775  | 0.029325  | 0.033160  | 0.032634  | 0.112292  | -0.107644 | 0.063520  |
| 94  | 0.005759  | 0.028819  | 0.005229  | 0.060361  | 0.107721  | 0.025116  | 0.023626  | 0.029415  | 0.028364  | 0.105233  | -0.159572 | 0.068028  |
| 95  | -0.003944 | 0.026006  | 0.011389  | -0.155901 | 0.103025  | 0.028741  | 0.030061  | 0.023343  | 0.024371  | 0.108534  | 0.060117  | -0.018090 |
| 96  | -0.000450 | 0.028973  | 0.011536  | -0.106049 | 0.110079  | 0.033105  | 0.033942  | 0.029016  | 0.030091  | 0.116366  | 0.056140  | -0.013709 |
| 97  | 0.005126  | 0.008536  | 0.005485  | 0.111273  | -0.108211 | 0.056410  | 0.116019  | 0.029899  | 0.028662  | 0.034505  | 0.033399  | -0.001099 |
| 98  | 0.003283  | 0.007993  | 0.003522  | 0.103819  | -0.162733 | 0.060772  | 0.108621  | 0.024550  | 0.023077  | 0.030666  | 0.029015  | -0.001217 |
| 99  | 0.003053  | 0.007957  | 0.003863  | 0.108681  | 0.060933  | -0.161093 | 0.104658  | 0.028553  | 0.029648  | 0.023739  | 0.025349  | -0.000714 |
| 100 | 0.004993  | 0.008409  | 0.005734  | 0.116137  | 0.057064  | -0.107094 | 0.111205  | 0.032468  | 0.033171  | 0.029389  | 0.031003  | -0.000793 |
| 101 | 0.011291  | 0.029551  | 0.000843  | 0.034328  | 0.033697  | 0.112727  | -0.106626 | 0.060369  | 0.118445  | 0.031151  | 0.029786  | -0.000614 |
| 102 | 0.011153  | 0.026308  | -0.002723 | 0.030196  | 0.029664  | 0.105345  | -0.154452 | 0.062531  | 0.109997  | 0.024891  | 0.024288  | -0.000656 |
| 103 | 0.004682  | 0.028955  | 0.006810  | 0.023690  | 0.025515  | 0.109877  | 0.063980  | -0.155890 | 0.105086  | 0.028875  | 0.030107  | -0.000727 |
| 104 | 0.006396  | 0.031351  | 0.008067  | 0.029406  | 0.031075  | 0.117273  | 0.060057  | -0.103914 | 0.112703  | 0.033492  | 0.033963  | -0.000632 |
| 105 | -0.102354 | 0.221436  | 0.402232  | 0.031009  | 0.029055  | 0.034006  | 0.032965  | 0.110188  | -0.106837 | 0.057633  | 0.116174  | -0.001512 |
| 106 | -0.300435 | 0.372557  | 0.405988  | 0.024817  | 0.023168  | 0.029675  | 0.028439  | 0.102355  | -0.153133 | 0.059972  | 0.107689  | -0.001489 |
| 107 | 0.415631  | 0.374228  | -0.311109 | 0.028738  | 0.030407  | 0.023851  | 0.025232  | 0.108430  | 0.062722  | -0.160723 | 0.103967  | -0.001928 |
| 108 | 0.403870  | 0.220771  | -0.102791 | 0.032969  | 0.034055  | 0.029371  | 0.030680  | 0.115907  | 0.058669  | -0.107324 | 0.110973  | -0.001351 |
| 109 | -0.002680 | 0.010962  | 0.005062  | 0.279325  | -0.406007 | 0.051904  | 0.028112  | 0.021554  | 0.025233  | 0.019072  | 0.045943  | -0.004575 |
| 110 | 0.001531  | 0.010744  | 0.004683  | -0.391450 | 0.289867  | 0.044249  | 0.015293  | 0.024813  | 0.019376  | 0.025902  | 0.046949  | -0.004141 |
| 111 | 0.004132  | 0.010875  | 0.001612  | 0.016142  | 0.044386  | 0.279801  | -0.390630 | 0.050927  | 0.026290  | 0.019757  | 0.024250  | -0.001140 |
| 112 | 0.004753  | 0.010913  | -0.002017 | 0.028812  | 0.051577  | -0.396351 | 0.272903  | 0.045972  | 0.019086  | 0.025937  | 0.020497  | -0.000502 |
| 113 | -0.242408 | 0.074911  | 0.172774  | 0.019159  | 0.024556  | 0.015719  | 0.043134  | 0.270106  | -0.381833 | 0.050069  | 0.025769  | -0.001515 |
| 114 | -0.021966 | 0.085152  | 0.023347  | 0.024476  | 0.020950  | 0.026689  | 0.051873  | -0.389895 | 0.267188  | 0.044920  | 0.016781  | -0.000830 |
| 115 | 0.014952  | 0.083498  | -0.011405 | 0.049777  | 0.028228  | 0.021090  | 0.024339  | 0.018363  | 0.044511  | 0.282028  | -0.400187 | 0.035165  |
| 116 | 0.180479  | 0.074817  | -0.252211 | 0.044916  | 0.016842  | 0.024826  | 0.019874  | 0.026893  | 0.049709  | -0.397168 | 0.286249  | -0.031932 |
| 117 | -0.003366 | 0.008419  | -0.002597 | -0.015911 | -0.015724 | -0.000986 | -0.008442 | 0.008670  | 0.010210  | 0.003459  | 0.003911  | 0.000415  |
| 118 | -0.005307 | 0.007044  | -0.004748 | -0.010573 | -0.010268 | -0.000317 | -0.006925 | -0.000816 | 0.001171  | -0.000553 | -0.001355 | -0.000089 |
| 119 | -0.005614 | 0.007835  | -0.005204 | -0.010284 | -0.008882 | -0.001191 | -0.005487 | -0.005749 | -0.002537 | -0.000016 | -0.001646 | -0.000007 |
| 120 | -0.002174 | 0.002029  | -0.001803 | -0.002515 | -0.000859 | -0.000209 | -0.002001 | -0.001790 | -0.000423 | 0.000614  | 0.000023  | -0.000256 |
| 121 | 0.001376  | -0.001169 | 0.001115  | 0.001620  | 0.000551  | 0.000153  | 0.001239  | 0.001099  | 0.000342  | -0.000127 | 0.000170  | 0.000135  |
| 122 | 0.000792  | -0.000843 | 0.000683  | 0.000885  | 0.000286  | 0.000054  | 0.000754  | 0.000698  | 0.000096  | -0.000486 | -0.000184 | 0.000122  |

|     |           |           |           |           |           |           |           |           |           |           |           |           |
|-----|-----------|-----------|-----------|-----------|-----------|-----------|-----------|-----------|-----------|-----------|-----------|-----------|
| 123 | -0.002893 | 0.003474  | -0.003006 | -0.003711 | -0.001635 | 0.000619  | -0.001518 | -0.001706 | -0.000106 | -0.000827 | -0.001251 | -0.000242 |
| 124 | 0.000996  | -0.001169 | 0.001145  | 0.001036  | 0.000699  | -0.000359 | 0.000593  | 0.000520  | -0.000096 | 0.000494  | 0.000266  | 0.000017  |
| 125 | 0.001905  | -0.002327 | 0.001867  | 0.002696  | 0.000983  | -0.000254 | 0.000935  | 0.001178  | 0.000181  | 0.000330  | 0.000961  | 0.000222  |
| 126 | -0.005762 | 0.006934  | -0.005122 | -0.015663 | -0.010108 | -0.000502 | -0.005752 | -0.001884 | -0.001487 | -0.000690 | -0.001309 | 0.000359  |
| 127 | -0.004745 | 0.004788  | -0.004147 | -0.007017 | -0.004585 | -0.000879 | -0.004795 | -0.002586 | -0.002313 | -0.000468 | -0.001836 | -0.000265 |
| 128 | -0.000085 | 0.000033  | -0.000117 | 0.000404  | 0.000077  | -0.000150 | -0.000278 | -0.000254 | -0.000113 | -0.000144 | 0.000141  | -0.000031 |
| 129 | 0.000346  | -0.000343 | 0.000486  | 0.000145  | -0.000163 | 0.000046  | -0.000032 | 0.000136  | 0.000145  | 0.000442  | 0.000062  | 0.000099  |
| 130 | 0.000218  | -0.000247 | 0.000266  | -0.000070 | 0.000283  | 0.000151  | 0.000207  | -0.000008 | -0.000018 | -0.000101 | 0.000186  | 0.000093  |
| 131 | -0.000262 | 0.000188  | -0.000107 | -0.000430 | -0.000340 | 0.000007  | 0.000033  | -0.000078 | -0.000007 | -0.000102 | 0.000274  | 0.000056  |
| 132 | -0.000126 | 0.000174  | -0.000211 | -0.000100 | 0.000394  | 0.000074  | -0.000004 | 0.000069  | -0.000078 | 0.000034  | -0.000410 | -0.000144 |
| 133 | -0.000106 | 0.000209  | -0.000332 | 0.000042  | -0.000251 | -0.000130 | 0.000071  | 0.000131  | 0.000067  | -0.000134 | -0.000256 | -0.000077 |
| 134 | -0.006617 | -0.013473 | -0.006266 | 0.082439  | 0.021830  | -0.004887 | 0.003312  | -0.020926 | -0.006941 | -0.035725 | -0.031207 | 0.001401  |
| 135 | -0.009632 | -0.005151 | 0.004335  | 0.010268  | 0.030098  | 0.004186  | 0.005414  | 0.010711  | 0.010631  | 0.016129  | -0.029655 | 0.003566  |
| 136 | -0.001568 | -0.006342 | 0.003434  | -0.017270 | 0.036759  | 0.007683  | 0.009622  | 0.003047  | 0.003533  | 0.000400  | 0.013111  | -0.003205 |
| 137 | -0.001630 | -0.009546 | 0.000768  | -0.031419 | 0.031131  | 0.009453  | 0.010708  | -0.007255 | -0.001070 | -0.001021 | -0.001851 | 0.001407  |
| 138 | -0.000944 | -0.011330 | 0.002172  | 0.017444  | -0.019963 | 0.000136  | 0.002281  | -0.014022 | -0.008703 | -0.010962 | -0.023351 | 0.004229  |
| 139 | -0.000004 | 0.004064  | 0.003218  | 0.059955  | 0.066327  | -0.024064 | 0.001992  | -0.004654 | -0.009052 | 0.014137  | 0.015196  | -0.000933 |
| 140 | 0.002345  | -0.004898 | -0.000990 | -0.034434 | 0.025658  | -0.005226 | -0.005955 | -0.015160 | -0.009546 | -0.003422 | 0.003904  | 0.000231  |
| 141 | 0.001165  | -0.001473 | 0.001336  | 0.011939  | -0.012883 | 0.005679  | 0.004542  | -0.007974 | -0.001376 | 0.004570  | 0.010924  | -0.000329 |
| 142 | 0.000806  | 0.003186  | -0.001224 | 0.013972  | 0.012326  | 0.008872  | -0.007817 | -0.001550 | -0.000116 | 0.000739  | 0.010722  | -0.000591 |
| 143 | 0.003562  | 0.005256  | -0.002533 | 0.025662  | 0.036416  | -0.064912 | 0.005995  | 0.010585  | 0.011651  | 0.000945  | 0.009157  | -0.000799 |
| 144 | 0.019495  | 0.023734  | -0.003463 | 0.000774  | 0.014957  | 0.024619  | -0.004895 | 0.100785  | 0.103340  | 0.011592  | 0.022999  | -0.000796 |
| 145 | 0.008521  | 0.007939  | -0.005524 | 0.008883  | 0.011808  | 0.000387  | -0.036057 | 0.052661  | 0.037382  | -0.000049 | 0.006608  | -0.000570 |
| 146 | 0.005227  | 0.003304  | -0.001647 | -0.000884 | 0.000721  | -0.007254 | 0.027665  | 0.011002  | 0.014411  | 0.000584  | 0.004155  | -0.000138 |
| 147 | -0.003421 | 0.003083  | -0.000433 | -0.003370 | -0.008542 | -0.000432 | -0.004242 | -0.024805 | -0.005228 | 0.002982  | -0.004077 | -0.000075 |
| 148 | 0.003214  | -0.009775 | 0.001918  | -0.009331 | -0.015554 | -0.013929 | -0.011346 | -0.001617 | -0.035361 | -0.001936 | -0.004806 | 0.000008  |
| 149 | 0.097141  | -0.068472 | -0.078772 | 0.016440  | -0.005632 | 0.012151  | -0.001212 | 0.055636  | 0.096204  | -0.047470 | 0.008030  | -0.001557 |
| 150 | 0.017921  | 0.004415  | -0.011943 | -0.002339 | -0.014984 | -0.003501 | -0.005500 | -0.024795 | -0.012980 | -0.000520 | -0.013246 | -0.000189 |
| 151 | -0.038919 | -0.007578 | 0.046854  | 0.002479  | -0.011328 | 0.000658  | -0.000014 | 0.030063  | -0.031346 | 0.029137  | -0.019340 | 0.000228  |
| 152 | -0.041399 | -0.009694 | 0.039891  | 0.003301  | 0.000434  | 0.007623  | 0.000244  | 0.047144  | -0.006206 | 0.036598  | -0.017201 | 0.000285  |
| 153 | 0.033474  | 0.021759  | -0.039564 | 0.011974  | 0.007988  | 0.005117  | -0.000703 | 0.036179  | 0.029521  | -0.021841 | 0.001474  | -0.000965 |
| 154 | 0.000064  | -0.006584 | 0.000295  | -0.027119 | 0.001862  | 0.006909  | 0.004120  | -0.013340 | -0.005452 | -0.002034 | 0.001172  | 0.000213  |
| 155 | 0.005742  | 0.007467  | -0.004707 | 0.014296  | 0.014489  | -0.025049 | -0.013891 | 0.023357  | 0.019350  | -0.000298 | 0.009784  | -0.001023 |
| 156 | -0.025581 | 0.002509  | 0.018388  | -0.002605 | -0.014035 | -0.003206 | 0.000622  | -0.006472 | -0.032662 | 0.003649  | -0.006407 | -0.000075 |
| 157 | -0.008942 | -0.001663 | 0.015662  | 0.011200  | 0.017915  | 0.006822  | 0.002968  | 0.023288  | 0.020890  | 0.010131  | -0.017881 | 0.001093  |
| 158 | 0.000073  | -0.001319 | 0.000715  | -0.001349 | -0.002554 | -0.000441 | 0.001518  | -0.001396 | -0.001873 | -0.000481 | 0.001161  | 0.000134  |
| 159 | 0.001478  | -0.004588 | 0.001573  | 0.002741  | 0.006043  | 0.000588  | 0.002265  | -0.001848 | -0.004008 | -0.000480 | -0.002679 | -0.000397 |
| 160 | 0.001043  | -0.002950 | 0.000779  | 0.002873  | 0.006243  | 0.000648  | 0.001294  | -0.001147 | -0.002725 | -0.000305 | -0.003219 | -0.000373 |
| 161 | 0.000329  | 0.000185  | -0.000086 | 0.002004  | 0.002255  | 0.000273  | -0.000446 | 0.000468  | 0.002205  | 0.000212  | -0.000729 | -0.000153 |
| 162 | 0.003297  | 0.000471  | 0.002325  | 0.001265  | -0.001369 | -0.004323 | -0.005313 | -0.003338 | 0.003070  | 0.005444  | 0.004466  | 0.000367  |
| 163 | -0.000561 | 0.005539  | -0.003432 | 0.007873  | 0.012225  | 0.002780  | -0.002777 | 0.004951  | 0.009835  | 0.001245  | -0.003399 | -0.000649 |
| 164 | -0.005273 | -0.011315 | 0.005946  | 0.010408  | 0.048914  | 0.012168  | 0.012853  | 0.003001  | 0.005642  | 0.003084  | 0.027549  | -0.003247 |
| 165 | -0.002265 | 0.001003  | 0.000118  | 0.030466  | -0.001975 | 0.000975  | 0.000542  | 0.001077  | 0.002724  | 0.011403  | -0.028416 | 0.002285  |
| 166 | 0.000784  | 0.015838  | -0.001065 | 0.063764  | -0.050116 | -0.014309 | -0.016818 | 0.013528  | 0.003372  | 0.008666  | -0.024995 | 0.002298  |
| 167 | 0.001104  | -0.001640 | 0.001073  | 0.012593  | -0.052043 | 0.024168  | 0.001003  | -0.015326 | -0.005577 | 0.006003  | 0.016517  | -0.000405 |
| 168 | -0.000702 | -0.000531 | -0.001273 | -0.015456 | 0.005271  | 0.011604  | -0.012213 | -0.005145 | -0.004962 | -0.004225 | -0.003517 | 0.000139  |
| 169 | -0.001971 | -0.004629 | 0.001687  | -0.030085 | -0.011106 | -0.039296 | 0.010047  | 0.001001  | -0.001805 | -0.002449 | -0.018127 | 0.001141  |
| 170 | -0.003209 | -0.020662 | 0.011503  | 0.000634  | 0.008996  | 0.030629  | 0.025954  | -0.017428 | -0.037848 | 0.002459  | -0.003940 | 0.001047  |
| 171 | -0.007756 | -0.004190 | 0.001833  | 0.002125  | 0.000039  | 0.011598  | -0.039062 | -0.019770 | -0.016535 | 0.000059  | -0.005816 | 0.000218  |
| 172 | -0.002853 | -0.010814 | 0.002688  | 0.006343  | 0.012283  | 0.005128  | -0.027177 | 0.048447  | -0.015324 | -0.005122 | -0.001983 | 0.000367  |



|     |           |           |           |           |           |           |           |           |           |           |           |           |
|-----|-----------|-----------|-----------|-----------|-----------|-----------|-----------|-----------|-----------|-----------|-----------|-----------|
| 173 | -0.066493 | -0.017067 | 0.076041  | 0.004042  | -0.016654 | 0.004223  | 0.000067  | 0.049305  | -0.050307 | 0.031720  | -0.021127 | 0.000234  |
| 174 | -0.018988 | 0.005664  | -0.000827 | -0.000598 | 0.002082  | 0.002368  | 0.001661  | 0.003249  | -0.015979 | -0.005412 | 0.003144  | -0.000111 |
| 175 | 0.041119  | 0.015374  | -0.042482 | -0.006145 | 0.001628  | -0.008799 | 0.000720  | -0.066408 | -0.018416 | -0.044307 | 0.028548  | -0.000624 |
| 176 | 0.005459  | 0.004007  | -0.011413 | -0.079752 | -0.002186 | 0.005422  | 0.004138  | -0.015839 | 0.001151  | -0.002328 | 0.029904  | -0.000115 |
| 177 | 0.003068  | 0.013805  | -0.010143 | 0.032081  | -0.043972 | 0.000008  | -0.010628 | 0.008520  | 0.007209  | -0.003170 | 0.017540  | -0.000195 |
| 178 | -0.003158 | 0.010741  | -0.002222 | 0.017868  | 0.026711  | -0.047041 | 0.014463  | 0.016690  | 0.004702  | 0.000269  | 0.000743  | -0.000179 |
| 179 | -0.008549 | -0.001230 | 0.005714  | -0.001109 | 0.001685  | 0.019019  | -0.025398 | -0.011456 | -0.020754 | 0.006407  | -0.009875 | 0.000206  |
| 180 | -0.024267 | 0.011489  | 0.003549  | -0.005809 | -0.009649 | 0.005628  | -0.012325 | 0.037884  | -0.034483 | 0.001155  | -0.016038 | 0.000030  |
| 181 | 0.068441  | -0.006657 | -0.062995 | -0.003732 | 0.016002  | 0.009760  | -0.008201 | 0.021757  | 0.065417  | -0.017922 | -0.011092 | -0.000319 |
| 182 | -0.064314 | -0.045310 | 0.077976  | -0.016667 | 0.022281  | 0.010986  | 0.001226  | 0.008604  | 0.010807  | 0.060309  | 0.001488  | 0.001741  |
| 183 | -0.006981 | -0.023399 | -0.010920 | -0.033786 | -0.002168 | 0.001846  | 0.000866  | -0.027600 | -0.009409 | -0.037030 | 0.067850  | -0.008363 |
| 184 | 0.001655  | -0.002379 | 0.000863  | 0.002194  | 0.004530  | 0.001024  | -0.001079 | -0.000485 | 0.001317  | -0.000441 | -0.002318 | -0.000215 |
| 185 | 0.001635  | -0.005136 | 0.001992  | 0.003438  | 0.007852  | 0.000509  | 0.002498  | -0.002629 | -0.005753 | -0.000298 | -0.003632 | -0.000496 |
| 186 | -0.000494 | 0.000609  | -0.000175 | -0.000619 | -0.001698 | -0.000134 | 0.000257  | 0.000129  | -0.000589 | 0.000036  | 0.000834  | 0.000181  |
| 187 | -0.001001 | 0.003228  | -0.001096 | -0.005049 | -0.009314 | -0.000873 | -0.001627 | 0.001286  | 0.004471  | -0.000206 | 0.004238  | 0.000437  |
| 188 | -0.001886 | 0.003903  | -0.001653 | -0.000339 | -0.001930 | -0.000576 | -0.000239 | 0.001745  | 0.000803  | 0.000920  | 0.001053  | 0.000118  |
| 189 | -0.000032 | 0.000058  | -0.000014 | 0.000233  | 0.000056  | -0.000035 | 0.000058  | 0.000075  | 0.000035  | 0.000094  | -0.000005 | -0.000061 |
| 190 | 0.001008  | -0.000205 | 0.000546  | -0.038769 | -0.012705 | 0.005524  | -0.004208 | 0.000533  | 0.000579  | -0.003320 | 0.004221  | 0.000238  |
| 191 | 0.000424  | -0.000101 | 0.000535  | 0.009452  | -0.004271 | 0.004219  | -0.002352 | 0.002345  | -0.001887 | -0.002426 | 0.001065  | 0.000382  |
| 192 | -0.000294 | 0.000433  | -0.000532 | -0.011014 | -0.000251 | -0.000569 | 0.000021  | -0.001844 | 0.001928  | -0.000408 | 0.000635  | 0.000072  |
| 193 | 0.000299  | -0.000127 | 0.000685  | 0.002659  | -0.016467 | -0.000110 | 0.000216  | 0.001686  | -0.001222 | 0.000984  | -0.000114 | -0.000011 |
| 194 | -0.000012 | 0.000391  | -0.000781 | -0.005674 | 0.013128  | 0.002678  | -0.002921 | -0.001727 | 0.001195  | -0.003633 | 0.002639  | 0.000357  |
| 195 | 0.001156  | -0.000037 | 0.001153  | -0.020331 | -0.042331 | 0.003924  | -0.003195 | 0.000816  | 0.001017  | -0.002824 | 0.006616  | 0.000204  |
| 196 | 0.000183  | -0.000148 | 0.000018  | 0.004069  | 0.001724  | 0.001611  | -0.001047 | 0.000052  | 0.000044  | -0.000507 | 0.000690  | 0.000008  |
| 197 | -0.000020 | 0.000226  | -0.000036 | 0.000011  | -0.000376 | 0.000806  | -0.000693 | -0.000008 | 0.000052  | -0.000582 | 0.000852  | 0.000072  |
| 198 | -0.000088 | 0.000300  | -0.000064 | -0.000661 | -0.000388 | 0.000192  | -0.000067 | 0.000041  | 0.000074  | 0.000025  | 0.000176  | 0.000064  |
| 199 | -0.000019 | 0.000237  | -0.000016 | -0.000415 | -0.000407 | 0.000737  | -0.000633 | -0.000001 | 0.000032  | -0.000617 | 0.000948  | 0.000118  |
| 200 | 0.000314  | -0.000419 | 0.000226  | 0.004453  | 0.003827  | 0.000365  | -0.000567 | -0.000083 | -0.000245 | -0.001039 | 0.001007  | -0.000009 |
| 201 | 0.000812  | -0.000210 | 0.000789  | -0.004417 | 0.004780  | -0.015189 | -0.038249 | 0.004715  | -0.003387 | 0.000787  | 0.000158  | 0.000008  |
| 202 | 0.000338  | -0.000025 | 0.000537  | -0.002460 | 0.002964  | -0.006695 | 0.009633  | 0.002365  | -0.002599 | -0.001383 | 0.001375  | 0.000071  |
| 203 | -0.000790 | 0.000380  | -0.000231 | 0.000269  | 0.000145  | 0.001646  | -0.010342 | -0.000446 | -0.000517 | 0.001270  | -0.001313 | 0.000061  |
| 204 | 0.000761  | -0.000397 | 0.000240  | 0.000326  | 0.000639  | -0.012396 | 0.000314  | -0.000816 | 0.000409  | -0.001486 | 0.001946  | -0.000032 |
| 205 | -0.000461 | 0.000553  | -0.000212 | -0.003144 | 0.001478  | 0.010220  | -0.002663 | 0.003388  | -0.003079 | 0.001677  | -0.001800 | 0.000017  |
| 206 | 0.000946  | 0.000083  | 0.001231  | -0.002615 | 0.004640  | -0.039552 | -0.021441 | 0.006023  | -0.002905 | 0.000888  | 0.001053  | 0.000043  |
| 207 | 0.000074  | -0.000215 | 0.000093  | -0.001037 | 0.000925  | 0.003205  | 0.004402  | 0.000617  | -0.000558 | -0.000040 | -0.000223 | -0.000026 |
| 208 | -0.000067 | 0.000163  | -0.000033 | -0.000604 | 0.000960  | -0.000194 | -0.000349 | 0.000666  | -0.000710 | -0.000043 | 0.000031  | 0.000034  |
| 209 | -0.000084 | 0.000264  | -0.000117 | -0.000003 | 0.000240  | -0.000452 | -0.000498 | 0.000271  | -0.000068 | 0.000042  | 0.000023  | 0.000029  |
| 210 | -0.000043 | 0.000245  | -0.000001 | -0.000541 | 0.000885  | -0.000067 | -0.000493 | 0.000814  | -0.000672 | 0.000018  | 0.000118  | 0.000051  |
| 211 | 0.000243  | -0.000331 | 0.000251  | -0.000414 | 0.000249  | 0.003732  | 0.004537  | 0.000875  | -0.001028 | -0.000247 | -0.000071 | -0.000005 |
| 212 | 0.017299  | 0.001898  | -0.006732 | 0.000533  | 0.001158  | -0.002817 | 0.004250  | -0.040289 | -0.021230 | 0.005784  | -0.003359 | 0.000033  |
| 213 | -0.008902 | 0.004254  | -0.000293 | 0.001339  | -0.001945 | -0.003264 | 0.001513  | 0.009830  | -0.002934 | 0.003234  | -0.002941 | 0.000147  |
| 214 | 0.004609  | -0.001481 | -0.002474 | -0.001470 | 0.001826  | 0.000191  | 0.000669  | -0.012015 | 0.000734  | -0.000509 | 0.000446  | 0.000049  |
| 215 | -0.005453 | -0.000245 | 0.001563  | 0.001322  | -0.001209 | 0.000221  | 0.000063  | 0.000741  | -0.010694 | -0.000446 | -0.000368 | -0.000017 |
| 216 | 0.004539  | 0.002681  | -0.005980 | -0.001548 | 0.001650  | -0.002708 | 0.003275  | -0.005826 | 0.010132  | 0.002289  | -0.002966 | 0.000017  |
| 217 | -0.002140 | 0.004559  | 0.004565  | 0.000639  | 0.000403  | -0.003823 | 0.004645  | -0.014698 | -0.037879 | 0.004550  | -0.003251 | 0.000057  |
| 218 | 0.001022  | 0.001737  | -0.000797 | -0.000308 | -0.000033 | -0.000511 | 0.000314  | 0.003809  | 0.003847  | 0.000996  | -0.000888 | 0.000015  |
| 219 | -0.000774 | 0.001054  | -0.000167 | -0.000064 | 0.000102  | -0.000635 | 0.000894  | -0.000127 | -0.000489 | 0.000786  | -0.000762 | 0.000030  |
| 220 | -0.000788 | 0.000226  | 0.000332  | 0.000063  | 0.000055  | -0.000065 | 0.000255  | -0.000492 | -0.000458 | 0.000274  | -0.000061 | 0.000037  |
| 221 | -0.000641 | 0.000863  | 0.000050  | -0.000054 | 0.000062  | -0.000558 | 0.000986  | -0.000131 | -0.000126 | 0.000729  | -0.000697 | 0.000010  |
| 222 | -0.000589 | 0.000826  | 0.000155  | -0.000016 | -0.000159 | -0.001129 | 0.001009  | 0.002974  | 0.004533  | 0.000709  | -0.000548 | -0.000009 |

|     |           |           |           |           |           |           |           |           |           |           |           |           |
|-----|-----------|-----------|-----------|-----------|-----------|-----------|-----------|-----------|-----------|-----------|-----------|-----------|
| 223 | -0.007044 | 0.001789  | 0.017893  | 0.004312  | -0.002932 | 0.001048  | 0.000955  | -0.003250 | 0.006255  | -0.019824 | -0.040248 | 0.006252  |
| 224 | 0.000271  | 0.003863  | -0.010354 | 0.002616  | -0.002536 | -0.001684 | 0.001308  | -0.003048 | 0.002135  | -0.006233 | 0.013395  | -0.004375 |
| 225 | -0.002912 | -0.001181 | 0.005441  | 0.000366  | -0.000191 | 0.001725  | -0.001324 | 0.000478  | 0.000113  | 0.001913  | -0.015319 | 0.003276  |
| 226 | 0.002455  | 0.000118  | -0.006291 | -0.000547 | 0.000492  | -0.001532 | 0.001705  | -0.000129 | -0.000109 | -0.011788 | 0.001124  | -0.003798 |
| 227 | -0.006591 | 0.002496  | 0.005870  | 0.003449  | -0.003019 | 0.001556  | -0.001746 | -0.002827 | 0.002012  | 0.011530  | -0.005834 | 0.002158  |
| 228 | 0.004822  | 0.004721  | -0.002510 | 0.004545  | -0.003824 | 0.000122  | 0.000899  | -0.003228 | 0.004791  | -0.038677 | -0.016615 | -0.001176 |
| 229 | -0.001368 | 0.002097  | 0.000959  | 0.000310  | -0.000544 | -0.000109 | -0.000072 | -0.001101 | 0.001061  | 0.004307  | 0.003515  | 0.000236  |
| 230 | -0.000162 | 0.001176  | -0.000763 | 0.000746  | -0.000656 | 0.000025  | 0.000120  | -0.000624 | 0.000953  | -0.000284 | -0.000275 | -0.000052 |
| 231 | 0.000296  | 0.000219  | -0.000790 | 0.000244  | -0.000088 | 0.000019  | 0.000045  | -0.000021 | 0.000224  | -0.000485 | -0.000397 | -0.000146 |
| 232 | -0.000005 | 0.000888  | -0.000582 | 0.000825  | -0.000710 | -0.000025 | -0.000009 | -0.000645 | 0.000807  | -0.000121 | -0.000360 | -0.000129 |
| 233 | 0.000066  | 0.000667  | -0.000629 | 0.001185  | -0.000973 | -0.000156 | 0.000101  | -0.000437 | 0.000589  | 0.004294  | 0.002224  | 0.002921  |
| 234 | 0.000826  | 0.000398  | 0.000189  | 0.009643  | -0.021995 | 0.005467  | -0.007037 | -0.001529 | 0.000669  | -0.006941 | 0.009986  | 0.000304  |
| 235 | 0.000764  | -0.000443 | 0.000643  | -0.016450 | 0.030401  | 0.007548  | -0.008468 | 0.001006  | -0.001905 | -0.007238 | 0.003701  | 0.000739  |
| 236 | -0.000238 | -0.000278 | -0.000104 | -0.004499 | -0.000670 | -0.002278 | 0.004297  | 0.000592  | 0.000302  | 0.004063  | -0.004594 | -0.000298 |
| 237 | -0.000380 | 0.000097  | -0.000086 | -0.007498 | -0.009124 | -0.002660 | 0.004660  | 0.000840  | 0.000289  | 0.003608  | -0.003783 | -0.000201 |
| 238 | 0.000010  | 0.000016  | 0.000046  | 0.005945  | 0.000624  | -0.000063 | -0.000405 | 0.000028  | -0.000185 | -0.000009 | 0.000591  | -0.000039 |
| 239 | -0.000075 | -0.000055 | -0.000019 | 0.004359  | 0.000971  | -0.001043 | 0.000402  | -0.000076 | -0.000126 | 0.000734  | -0.000396 | -0.000119 |
| 240 | -0.000099 | 0.000118  | -0.000080 | 0.004795  | 0.006245  | 0.000345  | -0.001184 | -0.000291 | -0.000363 | -0.001213 | 0.000400  | 0.000174  |
| 241 | -0.000078 | 0.000129  | -0.000093 | 0.004564  | 0.006450  | 0.000478  | -0.001248 | -0.000172 | -0.000379 | -0.001173 | 0.000289  | 0.000166  |
| 242 | -0.000114 | -0.000050 | -0.000149 | 0.001660  | 0.003029  | -0.000316 | 0.000649  | -0.000185 | 0.000106  | 0.000289  | -0.000828 | -0.000078 |
| 243 | -0.000061 | 0.000034  | -0.000143 | 0.001511  | 0.004244  | 0.000644  | -0.000265 | -0.000268 | 0.000137  | -0.000584 | 0.000283  | 0.000027  |
| 244 | -0.000433 | 0.000338  | -0.000303 | -0.004216 | -0.011687 | -0.003560 | 0.004009  | -0.000037 | 0.000944  | 0.004216  | -0.002974 | -0.000254 |
| 245 | -0.000126 | -0.000297 | 0.000099  | 0.000397  | -0.008697 | -0.004566 | 0.004600  | 0.000090  | 0.000518  | 0.004260  | -0.002673 | -0.000422 |
| 246 | 0.000890  | 0.000423  | 0.000410  | -0.006783 | 0.006594  | -0.016732 | 0.006718  | 0.009011  | -0.006337 | 0.001257  | -0.000186 | -0.000061 |
| 247 | -0.000346 | -0.000206 | 0.000970  | -0.007984 | 0.006142  | 0.018877  | -0.014109 | 0.004809  | -0.007816 | -0.001531 | -0.000877 | 0.000276  |
| 248 | -0.000144 | -0.000190 | -0.000104 | 0.003932  | -0.003299 | -0.002286 | -0.002843 | -0.003704 | 0.004180  | 0.000300  | 0.000078  | -0.000023 |
| 249 | -0.000191 | 0.000173  | -0.000210 | 0.004431  | -0.003012 | -0.007300 | -0.006177 | -0.003362 | 0.003749  | -0.000019 | 0.000735  | -0.000009 |
| 250 | 0.000136  | -0.000116 | -0.000029 | -0.000467 | 0.000619  | 0.001829  | 0.004111  | 0.000183  | -0.000277 | -0.000304 | 0.000206  | -0.000040 |
| 251 | 0.000082  | -0.000199 | -0.000111 | 0.000446  | -0.000394 | 0.002005  | 0.002789  | -0.000832 | 0.000531  | -0.000266 | 0.000259  | -0.000039 |
| 252 | -0.000182 | 0.000095  | -0.000109 | -0.001022 | 0.000209  | 0.005615  | 0.005293  | 0.000213  | -0.001215 | -0.000269 | -0.000319 | 0.000037  |
| 253 | -0.000159 | 0.000080  | -0.000132 | -0.001104 | 0.000298  | 0.005752  | 0.005127  | 0.000166  | -0.001172 | -0.000303 | -0.000278 | 0.000041  |
| 254 | -0.000260 | 0.000065  | -0.000035 | 0.000601  | -0.000427 | 0.003003  | 0.002024  | -0.000644 | 0.000384  | 0.000033  | -0.000182 | 0.000027  |
| 255 | -0.000266 | 0.000163  | 0.000011  | -0.000269 | 0.000663  | 0.004360  | 0.001982  | 0.000423  | -0.000509 | 0.000086  | -0.000281 | 0.000031  |
| 256 | 0.000002  | 0.000123  | -0.000504 | 0.003858  | -0.003179 | -0.009132 | -0.004880 | -0.003328 | 0.004088  | 0.000685  | 0.000349  | -0.000089 |
| 257 | 0.000443  | -0.000405 | -0.000163 | 0.004371  | -0.004221 | -0.006196 | 0.000166  | -0.002933 | 0.004409  | 0.000337  | 0.000496  | -0.000148 |
| 258 | -0.002246 | 0.007074  | 0.000379  | -0.001310 | 0.000671  | -0.007342 | 0.007626  | 0.021463  | -0.014156 | 0.004642  | -0.008201 | -0.000018 |
| 259 | 0.014475  | 0.007926  | -0.012453 | 0.000217  | -0.001345 | -0.007265 | 0.005148  | -0.018962 | 0.007641  | 0.008489  | -0.006578 | 0.000258  |
| 260 | -0.000531 | -0.004189 | 0.004090  | 0.000461  | 0.000055  | 0.004166  | -0.004592 | -0.006738 | 0.000015  | -0.002580 | 0.004513  | -0.000053 |
| 261 | -0.003333 | 0.004584  | 0.004239  | 0.000891  | 0.000201  | 0.003993  | -0.003139 | -0.004849 | -0.004847 | -0.002998 | 0.004589  | 0.000015  |
| 262 | -0.001238 | 0.000662  | -0.000919 | 0.000043  | -0.000240 | -0.000323 | 0.000643  | 0.003853  | 0.001788  | 0.000252  | -0.000613 | -0.000013 |
| 263 | -0.000477 | -0.000704 | -0.000534 | 0.000076  | -0.000102 | 0.000613  | -0.000300 | 0.002686  | 0.001871  | -0.000828 | 0.000245  | -0.000055 |
| 264 | 0.000098  | 0.001066  | -0.001720 | -0.000317 | -0.000232 | -0.001187 | 0.000384  | 0.005905  | 0.004950  | 0.000189  | -0.001166 | 0.000051  |
| 265 | 0.000200  | 0.001200  | -0.001790 | -0.000345 | -0.000321 | -0.001146 | 0.000256  | 0.005629  | 0.005113  | 0.000247  | -0.001207 | 0.000046  |
| 266 | -0.001112 | -0.000941 | 0.000993  | -0.000213 | 0.000121  | 0.000438  | -0.000458 | 0.002219  | 0.003222  | -0.000628 | 0.000696  | 0.000003  |
| 267 | -0.001248 | 0.000236  | 0.000361  | -0.000287 | 0.000127  | -0.000373 | 0.000682  | 0.002150  | 0.004747  | 0.000332  | -0.000227 | 0.000007  |
| 268 | -0.001820 | -0.003684 | 0.003192  | 0.000219  | 0.000724  | 0.004163  | -0.003241 | -0.008182 | -0.006602 | -0.003210 | 0.003771  | -0.000091 |
| 269 | -0.002679 | -0.004076 | 0.004097  | 0.000567  | 0.000343  | 0.004271  | -0.003007 | -0.001647 | -0.003608 | -0.003913 | 0.004182  | -0.000149 |
| 270 | 0.002042  | 0.007061  | -0.003326 | 0.006587  | -0.008423 | -0.000322 | -0.001933 | -0.007928 | 0.004355  | -0.015960 | 0.024685  | -0.005558 |
| 271 | -0.014973 | 0.007534  | 0.017115  | 0.006946  | -0.006299 | -0.000692 | 0.000657  | -0.007165 | 0.008525  | 0.009681  | -0.017729 | 0.002817  |
| 272 | 0.004051  | -0.003927 | -0.001131 | -0.004791 | 0.004194  | 0.000290  | 0.000733  | 0.004470  | -0.002035 | 0.001027  | -0.008473 | 0.001548  |

|     |           |           |           |           |           |           |           |           |           |           |           |           |
|-----|-----------|-----------|-----------|-----------|-----------|-----------|-----------|-----------|-----------|-----------|-----------|-----------|
| 273 | 0.004529  | -0.004354 | -0.004050 | -0.003597 | 0.003857  | 0.000136  | 0.001054  | 0.004581  | -0.002700 | -0.005199 | -0.011543 | 0.001845  |
| 274 | -0.000721 | 0.000482  | -0.001241 | 0.000738  | -0.000069 | -0.000113 | 0.000063  | -0.000402 | -0.000112 | 0.001026  | 0.005326  | -0.000012 |
| 275 | -0.000373 | -0.000901 | -0.000510 | -0.000071 | 0.000771  | 0.000005  | -0.000041 | 0.000335  | -0.001253 | 0.001100  | 0.004060  | 0.000109  |
| 276 | -0.001818 | 0.000964  | 0.000067  | 0.000871  | -0.001177 | -0.000256 | -0.000572 | -0.001391 | -0.000018 | 0.004570  | 0.006770  | -0.001661 |
| 277 | -0.001877 | 0.001169  | 0.000218  | 0.000626  | -0.001110 | -0.000300 | -0.000478 | -0.001412 | 0.000142  | 0.004956  | 0.006411  | -0.001850 |
| 278 | 0.000865  | -0.000549 | -0.000789 | -0.001306 | 0.000198  | -0.000082 | 0.000039  | 0.000780  | 0.000026  | 0.004367  | 0.000408  | 0.000067  |
| 279 | 0.000267  | 0.000608  | -0.000830 | -0.000217 | -0.000684 | -0.000092 | -0.000046 | -0.000056 | 0.000974  | 0.005730  | 0.000236  | 0.000236  |
| 280 | 0.003483  | -0.003813 | -0.002137 | -0.002981 | 0.004581  | 0.001024  | 0.000273  | 0.003963  | -0.003570 | -0.007119 | -0.008841 | 0.000478  |
| 281 | 0.004457  | -0.004282 | -0.003274 | -0.002812 | 0.004168  | 0.000408  | 0.000249  | 0.004238  | -0.004335 | -0.004043 | -0.001432 | 0.001996  |
| 282 | 0.001080  | -0.000751 | -0.000678 | -0.045319 | 0.054383  | 0.000534  | -0.001130 | 0.000377  | -0.001600 | -0.001317 | -0.002718 | 0.000175  |
| 283 | 0.000057  | 0.000137  | -0.000479 | 0.007994  | -0.006734 | 0.001052  | 0.000146  | -0.000242 | 0.000331  | -0.000408 | -0.000518 | -0.000048 |
| 284 | 0.000140  | -0.000035 | 0.000248  | 0.001004  | -0.004522 | 0.000804  | -0.000426 | 0.000200  | 0.000059  | -0.000725 | 0.001299  | 0.000056  |
| 285 | -0.000001 | 0.000033  | -0.000001 | 0.006000  | -0.006875 | 0.000256  | 0.000395  | 0.000079  | 0.000129  | -0.000151 | 0.000168  | 0.000084  |
| 286 | -0.000205 | 0.000052  | 0.000023  | 0.004232  | -0.001707 | -0.000907 | 0.000818  | -0.000021 | -0.000048 | 0.000568  | -0.000602 | 0.000029  |
| 287 | -0.000013 | 0.000257  | 0.000405  | -0.006101 | 0.005548  | 0.000066  | 0.000038  | 0.000586  | -0.000128 | 0.000663  | 0.001167  | -0.000035 |
| 288 | -0.000363 | -0.000705 | 0.000705  | -0.001254 | 0.000076  | 0.048092  | -0.041824 | -0.000970 | -0.000970 | -0.001440 | 0.000735  | -0.000304 |
| 289 | -0.000444 | 0.000101  | -0.000076 | 0.000179  | 0.001048  | -0.007042 | 0.008288  | -0.000481 | -0.000491 | 0.000327  | -0.000285 | -0.000057 |
| 290 | 0.000236  | -0.000012 | 0.000138  | -0.000361 | 0.000478  | -0.004249 | 0.001193  | 0.001182  | -0.000638 | 0.000091  | 0.000132  | 0.000031  |
| 291 | 0.000017  | -0.000028 | -0.000021 | 0.000309  | 0.000138  | -0.006214 | 0.005717  | 0.000030  | -0.000253 | -0.000006 | 0.000062  | 0.000002  |
| 292 | 0.000042  | 0.000007  | -0.000136 | 0.000801  | -0.000705 | -0.001361 | 0.003222  | -0.000711 | 0.000457  | -0.000133 | 0.000081  | 0.000030  |
| 293 | 0.000383  | 0.000131  | 0.000022  | -0.000072 | -0.000154 | 0.007527  | -0.007212 | 0.000782  | 0.000240  | -0.000242 | 0.000374  | 0.000071  |
| 294 | -0.026164 | 0.001452  | 0.019491  | -0.001316 | 0.000363  | -0.000781 | -0.000608 | 0.044777  | -0.039763 | -0.000517 | -0.000109 | -0.000212 |
| 295 | 0.002358  | -0.000454 | -0.002104 | 0.000274  | -0.000465 | 0.000220  | -0.000066 | -0.008244 | 0.007598  | -0.000720 | 0.000043  | -0.000049 |
| 296 | 0.001673  | 0.000190  | -0.000672 | -0.000119 | 0.000084  | 0.000812  | -0.000616 | -0.001106 | 0.003097  | -0.000786 | 0.000342  | 0.000017  |
| 297 | 0.002807  | 0.000588  | -0.002800 | 0.000024  | 0.000052  | 0.000303  | 0.000173  | -0.005818 | 0.005573  | 0.000058  | -0.000274 | 0.000010  |
| 298 | 0.000455  | 0.001278  | -0.001003 | 0.000083  | 0.000200  | -0.000427 | 0.000545  | -0.003999 | 0.001048  | 0.001269  | -0.000651 | 0.000026  |
| 299 | -0.000243 | 0.000701  | 0.002012  | -0.000277 | 0.000361  | -0.000135 | -0.000802 | 0.006909  | -0.007750 | 0.000426  | 0.000287  | 0.000036  |
| 300 | 0.022917  | 0.001259  | -0.031002 | 0.000859  | -0.000718 | 0.000552  | -0.000962 | -0.000766 | -0.000936 | -0.047966 | 0.050983  | -0.010673 |
| 301 | -0.002141 | -0.000554 | 0.002304  | -0.000233 | 0.000009  | -0.000580 | 0.000235  | -0.000250 | -0.000755 | 0.006547  | -0.005985 | 0.002252  |
| 302 | -0.000813 | 0.000219  | 0.002113  | -0.000920 | 0.000803  | 0.000019  | -0.000137 | 0.000534  | -0.000782 | 0.003986  | -0.001441 | -0.000685 |
| 303 | -0.003074 | 0.000636  | 0.003132  | -0.000028 | 0.000272  | -0.000059 | 0.000083  | -0.000176 | 0.000132  | 0.006594  | -0.006982 | 0.001189  |
| 304 | -0.001331 | 0.001204  | 0.000592  | 0.000622  | -0.000539 | 0.000097  | 0.000064  | -0.000690 | 0.001176  | 0.001454  | -0.004706 | 0.000512  |
| 305 | 0.001672  | 0.000577  | 0.000164  | -0.000906 | -0.000334 | 0.000320  | -0.000481 | 0.000381  | 0.000209  | -0.007700 | 0.006840  | -0.001299 |
| 306 | 0.001228  | 0.004692  | 0.001276  | -0.058187 | -0.099866 | 0.013387  | 0.013498  | 0.007378  | 0.007291  | 0.013628  | 0.010440  | 0.000016  |
| 307 | 0.000148  | 0.000163  | -0.000790 | 0.010479  | -0.007011 | -0.000369 | 0.001684  | -0.000939 | 0.001009  | -0.000653 | -0.000565 | 0.000248  |
| 308 | 0.000468  | -0.000342 | 0.000256  | -0.013736 | 0.011511  | 0.001458  | -0.001426 | 0.000798  | -0.000823 | -0.000843 | 0.000415  | -0.000037 |
| 309 | -0.000151 | -0.000030 | -0.000125 | -0.003809 | 0.005769  | -0.000533 | -0.000057 | -0.000350 | -0.000040 | 0.000173  | -0.000693 | 0.000000  |
| 310 | -0.000046 | -0.000021 | 0.000055  | 0.004745  | -0.004632 | -0.000553 | 0.000510  | 0.000123  | -0.000085 | 0.000315  | -0.000288 | 0.000026  |
| 311 | 0.000107  | 0.000166  | 0.000062  | 0.008818  | -0.014857 | 0.001073  | -0.000302 | -0.000406 | 0.001023  | -0.001026 | 0.002295  | 0.000046  |
| 312 | -0.000514 | 0.000056  | 0.000542  | -0.006906 | 0.009579  | -0.001054 | -0.000428 | 0.000784  | -0.001096 | 0.002013  | -0.001170 | -0.000281 |
| 313 | 0.001273  | 0.003972  | 0.000814  | 0.012466  | 0.010684  | -0.083185 | -0.054805 | 0.008850  | 0.011568  | 0.006405  | 0.006000  | -0.000016 |
| 314 | -0.000717 | -0.000056 | -0.000066 | 0.001529  | -0.000106 | -0.007236 | 0.009847  | -0.000628 | -0.000994 | 0.000522  | -0.000670 | -0.000140 |
| 315 | 0.000329  | -0.000209 | 0.000394  | -0.001397 | 0.000964  | 0.009947  | -0.012031 | 0.000919  | -0.000505 | -0.000578 | 0.000691  | -0.000034 |
| 316 | -0.000133 | 0.000015  | -0.000106 | 0.000019  | -0.000457 | 0.004766  | -0.003525 | -0.000557 | 0.000274  | 0.000091  | -0.000260 | 0.000012  |
| 317 | 0.000050  | -0.000071 | -0.000027 | 0.000438  | -0.000385 | -0.003857 | 0.004199  | -0.000377 | 0.000218  | -0.000229 | 0.000157  | -0.000014 |
| 318 | -0.000014 | 0.000177  | 0.000066  | -0.000238 | 0.000889  | -0.013838 | 0.008820  | 0.001882  | -0.000958 | 0.000944  | -0.000505 | 0.000032  |
| 319 | 0.000483  | 0.000142  | -0.000254 | -0.000360 | -0.000898 | 0.010355  | -0.007532 | -0.001234 | 0.001954  | -0.000756 | 0.000589  | 0.000145  |
| 320 | 0.034444  | -0.004839 | -0.037643 | -0.006084 | -0.005550 | -0.011566 | -0.010804 | 0.081681  | 0.059633  | -0.009049 | -0.011407 | 0.000075  |
| 321 | -0.002309 | 0.004229  | -0.001219 | 0.000764  | -0.000649 | 0.000633  | 0.000617  | -0.010344 | 0.007673  | 0.001157  | -0.001537 | -0.000060 |
| 322 | -0.002844 | -0.002134 | 0.003690  | -0.000890 | 0.000385  | 0.000287  | -0.000944 | 0.013126  | -0.008476 | -0.001800 | 0.000987  | -0.000038 |

|     |           |           |           |           |           |           |           |           |           |           |           |           |
|-----|-----------|-----------|-----------|-----------|-----------|-----------|-----------|-----------|-----------|-----------|-----------|-----------|
| 323 | -0.003612 | 0.000298  | 0.002248  | 0.000210  | -0.000159 | -0.000454 | 0.000296  | 0.003589  | -0.004039 | 0.000464  | -0.000132 | -0.000004 |
| 324 | 0.002612  | 0.000301  | -0.002340 | -0.000100 | 0.000294  | -0.000090 | 0.000542  | -0.004383 | 0.003245  | 0.000551  | -0.000373 | 0.000016  |
| 325 | 0.004367  | 0.000182  | -0.003290 | 0.000546  | -0.000669 | 0.001453  | -0.000896 | -0.008983 | 0.011452  | -0.001259 | 0.000387  | 0.000017  |
| 326 | 0.001962  | -0.002889 | 0.000783  | -0.000525 | 0.000789  | -0.001821 | 0.000379  | 0.006769  | -0.009528 | 0.000877  | 0.000672  | 0.000070  |
| 327 | -0.043774 | -0.006646 | 0.041135  | -0.013083 | -0.013530 | -0.007176 | -0.006995 | -0.012604 | -0.010647 | 0.068270  | 0.090395  | -0.015509 |
| 328 | -0.001284 | 0.004397  | -0.002834 | 0.000293  | 0.000459  | -0.001152 | 0.001194  | -0.001808 | 0.001537  | 0.008293  | -0.011569 | -0.000849 |
| 329 | 0.004627  | -0.002121 | -0.003639 | -0.000784 | 0.000331  | 0.000584  | -0.000938 | 0.001058  | -0.001841 | -0.010138 | 0.014948  | -0.001913 |
| 330 | 0.002514  | 0.000151  | -0.004089 | 0.000713  | -0.000338 | -0.000027 | 0.000159  | -0.000245 | 0.000167  | -0.005279 | 0.004591  | -0.000940 |
| 331 | -0.002652 | 0.000402  | 0.002994  | 0.000357  | -0.000107 | 0.000182  | 0.000006  | -0.000287 | 0.000762  | 0.004478  | -0.005817 | 0.001282  |
| 332 | -0.003783 | 0.000438  | 0.005314  | -0.001605 | 0.001523  | -0.000794 | 0.000623  | 0.000638  | -0.000858 | 0.013923  | -0.010969 | -0.000044 |
| 333 | 0.000480  | -0.003277 | 0.002399  | 0.001007  | -0.001850 | 0.001201  | -0.001040 | 0.000659  | 0.000221  | -0.010993 | 0.008629  | 0.002498  |

|    | 37        | 38        | 39        | 40        | 41        | 42        | 43        | 44        | 45        | 46        | 47        | 48        |
|----|-----------|-----------|-----------|-----------|-----------|-----------|-----------|-----------|-----------|-----------|-----------|-----------|
| 1  | -0.000020 | -0.000093 | 0.000366  | -0.000353 | -0.000768 | -0.000799 | -0.000325 | -0.000368 | -0.000759 | -0.002785 | -0.000880 | 0.025025  |
| 2  | 0.002561  | 0.002538  | 0.002667  | 0.002570  | 0.003104  | 0.002857  | 0.002456  | 0.002664  | 0.002611  | 0.009822  | 0.002587  | 0.018874  |
| 3  | -0.027958 | 0.023478  | -0.009962 | -0.004512 | -0.004881 | -0.009802 | 0.021510  | 0.025678  | 0.016650  | 0.016573  | 0.037515  | 0.004772  |
| 4  | 0.020165  | -0.031644 | -0.029480 | 0.020280  | -0.010141 | -0.004209 | -0.004812 | 0.042053  | 0.036782  | 0.016265  | 0.017160  | -0.006265 |
| 5  | -0.004604 | -0.010014 | 0.021515  | -0.027698 | -0.028258 | 0.019486  | -0.010133 | 0.017294  | 0.028642  | 0.036454  | 0.017634  | -0.001109 |
| 6  | -0.009894 | -0.005344 | -0.004952 | -0.010401 | 0.021111  | -0.026635 | -0.029040 | 0.017050  | 0.016353  | 0.028008  | 0.028985  | 0.000676  |
| 7  | 0.000401  | 0.000285  | 0.000448  | 0.000221  | 0.000135  | 0.000236  | 0.000442  | 0.001058  | 0.000879  | 0.000435  | -0.000267 | 0.081869  |
| 8  | 0.009685  | -0.001270 | -0.001746 | -0.000465 | -0.000736 | -0.002063 | 0.027215  | -0.012127 | 0.000198  | 0.008437  | 0.022497  | 0.001411  |
| 9  | -0.058006 | 0.029550  | -0.001716 | -0.000496 | -0.000412 | -0.001571 | -0.001269 | 0.007112  | 0.007335  | -0.000541 | -0.012872 | 0.007453  |
| 10 | 0.025458  | -0.064299 | 0.010675  | -0.001496 | -0.001723 | -0.000366 | -0.000807 | 0.029114  | -0.013066 | -0.000230 | 0.007519  | 0.002978  |
| 11 | -0.001321 | 0.010323  | -0.062301 | 0.025731  | -0.001785 | -0.000545 | -0.000503 | -0.013593 | 0.022140  | 0.008074  | 0.000235  | 0.002171  |
| 12 | -0.000813 | -0.001567 | 0.027267  | -0.059493 | 0.011393  | -0.001217 | -0.001650 | 0.007250  | 0.011557  | -0.013864 | -0.000234 | 0.007416  |
| 13 | -0.000331 | -0.002098 | -0.001538 | 0.011041  | -0.062010 | 0.024855  | -0.001950 | 0.000474  | -0.012225 | 0.022796  | 0.008373  | 0.009534  |
| 14 | -0.001853 | -0.000187 | -0.000730 | -0.002049 | 0.027032  | -0.057732 | 0.011209  | -0.000504 | 0.008026  | 0.010003  | -0.011280 | 0.005995  |
| 15 | -0.001720 | -0.001128 | -0.000524 | -0.001741 | -0.001449 | 0.010430  | -0.061721 | 0.008064  | -0.000268 | -0.012220 | 0.010723  | 0.003684  |
| 16 | 0.063792  | 0.001074  | 0.000510  | 0.000816  | 0.000784  | 0.001584  | 0.001708  | -0.020638 | 0.000985  | -0.000597 | 0.012877  | -0.002169 |
| 17 | 0.062213  | 0.004018  | 0.001986  | 0.001424  | 0.001413  | 0.001835  | 0.003515  | 0.003135  | -0.005068 | -0.004645 | 0.003105  | 0.005317  |
| 18 | -0.043337 | 0.001983  | 0.001699  | 0.000836  | 0.000748  | 0.000266  | 0.000842  | 0.002428  | -0.000255 | 0.000979  | -0.026748 | 0.000260  |
| 19 | 0.001883  | -0.049483 | 0.066593  | 0.000841  | 0.000316  | 0.000706  | 0.000755  | 0.017245  | -0.024941 | 0.000806  | -0.000231 | 0.000442  |
| 20 | 0.003339  | 0.062794  | 0.062690  | 0.003257  | 0.001956  | 0.001340  | 0.001394  | 0.002294  | 0.002927  | -0.004577 | -0.005140 | 0.000367  |
| 21 | 0.000848  | 0.066199  | -0.046367 | 0.001792  | 0.001587  | 0.000752  | 0.000729  | -0.029373 | 0.008839  | -0.000366 | 0.000877  | 0.001191  |
| 22 | 0.000824  | 0.001528  | 0.001691  | -0.044635 | 0.064243  | 0.000742  | 0.000393  | -0.000522 | 0.003212  | -0.024341 | 0.000682  | 0.000226  |
| 23 | 0.001384  | 0.001842  | 0.003478  | 0.062501  | 0.062676  | 0.003277  | 0.002049  | -0.005217 | 0.003635  | 0.003057  | -0.005203 | 0.000768  |
| 24 | 0.000841  | 0.000466  | 0.001028  | 0.064051  | -0.043677 | 0.001690  | 0.001645  | 0.000875  | -0.019339 | 0.006976  | -0.000558 | -0.002977 |
| 25 | 0.000352  | 0.000788  | 0.000934  | 0.001645  | 0.001700  | -0.043634 | 0.065183  | 0.001078  | -0.000315 | 0.002989  | -0.022460 | 0.001271  |
| 26 | 0.001830  | 0.001556  | 0.001413  | 0.001957  | 0.003394  | 0.062434  | 0.063438  | -0.005024 | -0.004677 | 0.003520  | 0.002686  | -0.000033 |
| 27 | 0.001617  | 0.000904  | 0.000836  | 0.000316  | 0.000932  | 0.062606  | -0.046544 | -0.000330 | 0.000966  | -0.020122 | 0.003709  | 0.001259  |
| 28 | -0.049442 | 0.014370  | 0.006643  | 0.004636  | 0.002458  | 0.003558  | 0.004385  | 0.254187  | -0.019325 | -0.007222 | 0.002221  | 0.005201  |
| 29 | 0.012792  | -0.056186 | 0.015315  | 0.004020  | 0.003808  | 0.002357  | 0.004588  | 0.267083  | 0.002009  | -0.006836 | -0.019338 | 0.003903  |
| 30 | 0.004200  | 0.014559  | -0.053374 | 0.012305  | 0.006337  | 0.004418  | 0.002634  | 0.001202  | 0.256373  | -0.018733 | -0.007647 | 0.003967  |
| 31 | 0.004490  | 0.006117  | 0.013042  | -0.049578 | 0.015305  | 0.003817  | 0.003737  | -0.019676 | 0.251817  | 0.002566  | -0.007702 | 0.002031  |
| 32 | 0.002474  | 0.003567  | 0.004274  | 0.015153  | -0.053011 | 0.012074  | 0.006566  | -0.007345 | 0.003147  | 0.256325  | -0.019248 | -0.002909 |
| 33 | 0.003642  | 0.002869  | 0.004749  | 0.006529  | 0.012700  | -0.047857 | 0.014857  | -0.007520 | -0.018841 | 0.252683  | 0.001202  | 0.003773  |
| 34 | 0.006126  | 0.004987  | 0.002656  | 0.003776  | 0.004165  | 0.014751  | -0.053180 | -0.019259 | -0.006963 | 0.002284  | 0.257131  | 0.001135  |
| 35 | 0.014717  | 0.005208  | 0.003994  | 0.002551  | 0.004601  | 0.006086  | 0.013126  | 0.002291  | -0.007490 | -0.019056 | 0.265066  | 0.001548  |
| 36 | 0.004875  | 0.000093  | 0.000100  | 0.000073  | 0.000054  | 0.000085  | 0.000186  | -0.000355 | 0.000033  | 0.000052  | -0.004282 | -0.000049 |

|    |           |           |           |           |           |           |           |           |           |           |           |           |
|----|-----------|-----------|-----------|-----------|-----------|-----------|-----------|-----------|-----------|-----------|-----------|-----------|
| 37 | 5.529910  | 0.000209  | 0.000092  | 0.000098  | 0.000035  | 0.000096  | 0.000070  | -0.005283 | -0.000026 | 0.000006  | -0.000388 | 0.000058  |
| 38 | 0.000209  | 5.535510  | 0.004876  | 0.000123  | 0.000088  | 0.000040  | 0.000039  | -0.004975 | -0.000439 | 0.000024  | 0.000069  | -0.000113 |
| 39 | 0.000092  | 0.004876  | 5.537010  | 0.000213  | 0.000089  | 0.000073  | 0.000027  | -0.000399 | -0.006444 | 0.000001  | 0.000002  | -0.000056 |
| 40 | 0.000098  | 0.000123  | 0.000213  | 5.533070  | 0.004725  | 0.000075  | 0.000104  | 0.000042  | -0.003784 | -0.000446 | -0.000028 | -0.000362 |
| 41 | 0.000035  | 0.000088  | 0.000089  | 0.004725  | 5.539490  | 0.000162  | 0.000106  | 0.000001  | -0.000288 | -0.006412 | 0.000014  | -0.000637 |
| 42 | 0.000096  | 0.000040  | 0.000073  | 0.000075  | 0.000162  | 5.534090  | 0.004862  | 0.000022  | 0.000145  | -0.003751 | -0.000424 | -0.000271 |
| 43 | 0.000070  | 0.000039  | 0.000027  | 0.000104  | 0.000106  | 0.004862  | 5.539430  | 0.000058  | 0.000043  | -0.000371 | -0.006191 | -0.000036 |
| 44 | -0.005283 | -0.004975 | -0.000399 | 0.000042  | 0.000001  | 0.000022  | 0.000058  | 4.519530  | -0.000511 | 0.000273  | -0.000563 | 0.000304  |
| 45 | -0.000026 | -0.000439 | -0.006444 | -0.003784 | -0.000288 | 0.000145  | 0.000043  | -0.000511 | 4.516160  | -0.000547 | 0.000334  | 0.000369  |
| 46 | 0.000006  | 0.000024  | 0.000001  | -0.000446 | -0.006412 | -0.003751 | -0.000371 | 0.000273  | -0.000547 | 4.527360  | -0.000510 | -0.001771 |
| 47 | -0.000388 | 0.000069  | 0.000002  | -0.000028 | 0.000014  | -0.000424 | -0.006191 | -0.000563 | 0.000334  | -0.000510 | 4.524610  | -0.000527 |
| 48 | 0.000058  | -0.000113 | -0.000056 | -0.000362 | -0.000637 | -0.000271 | -0.000036 | 0.000304  | 0.000369  | -0.001771 | -0.000527 | 4.812700  |
| 49 | 0.000012  | 0.000140  | 0.000303  | 0.000372  | 0.000277  | 0.000376  | 0.000323  | 0.000058  | 0.001013  | 0.000381  | 0.001137  | 0.103127  |
| 50 | -0.000307 | -0.000118 | 0.000071  | -0.000103 | -0.000224 | -0.000090 | 0.000000  | -0.001698 | -0.000466 | -0.000690 | 0.000855  | 0.437758  |
| 51 | 0.000815  | 0.000657  | 0.000582  | 0.000321  | 0.000248  | 0.000398  | 0.000517  | 0.000726  | 0.000776  | 0.000306  | 0.001115  | 1.132180  |
| 52 | -0.000927 | -0.000439 | -0.000436 | -0.000240 | -0.000207 | -0.000437 | -0.000278 | -0.000767 | -0.000077 | -0.000776 | -0.000152 | 0.573860  |
| 53 | 0.000013  | 0.000022  | 0.000077  | 0.000037  | -0.000124 | 0.000049  | 0.000053  | -0.000023 | 0.000314  | -0.001085 | 0.000094  | 0.092528  |
| 54 | 0.000055  | 0.000051  | 0.000074  | 0.000069  | 0.000054  | 0.000064  | 0.000063  | 0.000015  | 0.000198  | 0.000104  | 0.000042  | 0.002262  |
| 55 | -0.000259 | -0.000154 | -0.000141 | -0.000117 | -0.000062 | -0.000063 | -0.000046 | 0.000312  | 0.000248  | 0.000241  | 0.000557  | -0.019415 |
| 56 | -0.000037 | 0.000046  | 0.000059  | 0.000066  | 0.000022  | 0.000038  | 0.000036  | -0.000934 | 0.000038  | 0.000021  | 0.000295  | -0.071890 |
| 57 | 0.000040  | 0.000063  | 0.000040  | 0.000012  | -0.000003 | -0.000001 | -0.000019 | 0.000088  | -0.000116 | -0.000059 | 0.000063  | -0.000480 |
| 58 | 0.000073  | 0.000032  | 0.000036  | 0.000031  | 0.000031  | 0.000043  | 0.000086  | -0.000103 | -0.000076 | -0.000044 | 0.000069  | -0.017335 |
| 59 | 0.000070  | 0.000119  | 0.000098  | 0.000057  | 0.000039  | 0.000033  | 0.000035  | 0.000073  | -0.000002 | -0.000038 | -0.000125 | -0.018392 |
| 60 | -0.000306 | -0.000193 | -0.000559 | 0.000380  | 0.000253  | 0.000331  | 0.000418  | -0.000123 | 0.000261  | -0.002029 | 0.000200  | 0.001603  |
| 61 | -0.001264 | 0.000517  | 0.001124  | 0.001263  | 0.001089  | 0.000226  | -0.000867 | 0.006548  | -0.003332 | 0.006151  | -0.001074 | -0.049431 |
| 62 | 0.001218  | -0.001094 | -0.000485 | -0.000197 | -0.001334 | 0.000341  | 0.001774  | -0.008414 | 0.001502  | -0.002812 | -0.000836 | 0.012277  |
| 63 | 0.000164  | -0.001029 | -0.000093 | 0.000691  | -0.000482 | -0.001070 | -0.000323 | -0.008807 | 0.001050  | -0.004373 | 0.001504  | 0.004239  |
| 64 | 0.000635  | 0.000831  | 0.000817  | -0.000284 | -0.001018 | 0.000112  | 0.000716  | 0.006085  | -0.002427 | 0.000257  | -0.003405 | -0.032192 |
| 65 | 0.001139  | 0.001553  | 0.000325  | -0.001408 | -0.001046 | 0.000468  | 0.000114  | 0.009351  | -0.001688 | 0.002108  | -0.001617 | 0.052788  |
| 66 | -0.000359 | 0.000095  | -0.000407 | 0.000391  | 0.000907  | -0.001041 | -0.001086 | -0.002373 | 0.003966  | -0.004401 | 0.000655  | 0.037464  |
| 67 | 0.000240  | -0.000450 | -0.000790 | -0.000205 | 0.000102  | -0.000145 | 0.000517  | -0.008964 | 0.002187  | -0.002202 | 0.002990  | -0.007564 |
| 68 | -0.001040 | 0.000488  | -0.000225 | -0.000421 | 0.000932  | 0.000299  | -0.001088 | 0.003098  | -0.001434 | 0.008636  | 0.001813  | -0.017431 |
| 69 | -0.010841 | -0.011659 | -0.001809 | 0.003368  | 0.009207  | 0.008591  | 0.003546  | 0.058972  | -0.016420 | -0.023245 | -0.016227 | 0.005201  |
| 70 | 0.003491  | -0.001787 | -0.011216 | -0.011187 | -0.001509 | 0.003227  | 0.009163  | -0.016841 | 0.057677  | -0.015899 | -0.024751 | 0.002488  |
| 71 | 0.008917  | 0.009539  | 0.003609  | -0.001448 | -0.011152 | -0.010528 | -0.001303 | -0.025138 | -0.017191 | 0.056723  | -0.018466 | -0.000063 |
| 72 | -0.001567 | 0.004059  | 0.009311  | 0.009112  | 0.003534  | -0.001327 | -0.011541 | -0.016894 | -0.023775 | -0.017204 | 0.059777  | -0.001705 |
| 73 | 0.050858  | -0.004799 | -0.003361 | -0.002841 | -0.004749 | -0.009633 | 0.014173  | -0.016837 | 0.009644  | 0.013836  | 0.026431  | -0.001137 |
| 74 | 0.032150  | 0.003147  | 0.001664  | 0.001182  | 0.001289  | 0.002400  | 0.003116  | 0.000318  | -0.003031 | -0.003262 | 0.003830  | 0.001486  |
| 75 | -0.131273 | 0.003408  | 0.002503  | 0.001206  | 0.001244  | 0.001512  | 0.002834  | -0.000176 | -0.003395 | -0.002793 | 0.001115  | 0.000955  |
| 76 | -0.014226 | 0.015138  | -0.010066 | -0.004342 | -0.002796 | -0.003220 | -0.004269 | 0.014475  | 0.014111  | 0.009269  | -0.024374 | -0.000165 |
| 77 | 0.013195  | -0.019014 | 0.052923  | -0.004150 | -0.003328 | -0.002563 | -0.004659 | 0.031215  | -0.022611 | 0.009181  | 0.014564  | -0.000920 |
| 78 | 0.003014  | -0.132557 | 0.032215  | 0.002531  | 0.001635  | 0.001126  | 0.001270  | 0.005584  | 0.001227  | -0.002698 | -0.003543 | 0.000905  |
| 79 | 0.002644  | 0.032196  | -0.132753 | 0.002878  | 0.002513  | 0.001190  | 0.001240  | 0.001240  | 0.003550  | -0.003065 | -0.003117 | 0.000826  |
| 80 | -0.004238 | 0.053288  | -0.017705 | 0.013501  | -0.009977 | -0.004244 | -0.002933 | -0.027060 | 0.025646  | 0.013256  | 0.009866  | 0.001595  |
| 81 | -0.004512 | -0.009524 | 0.014241  | -0.016023 | 0.052078  | -0.004053 | -0.003401 | 0.014823  | 0.018038  | -0.022166 | 0.010292  | 0.002794  |
| 82 | 0.001223  | 0.002362  | 0.002989  | -0.130937 | 0.031875  | 0.002589  | 0.001705  | -0.003673 | -0.000632 | 0.001121  | -0.003364 | 0.003422  |
| 83 | 0.001186  | 0.001561  | 0.002763  | 0.032024  | -0.131718 | 0.002905  | 0.002561  | -0.003242 | 0.000782  | 0.002845  | -0.003769 | 0.002741  |
| 84 | -0.002698 | -0.003342 | -0.004201 | 0.051019  | -0.017574 | 0.013155  | -0.010060 | 0.009776  | -0.016961 | 0.025113  | 0.014884  | 0.004184  |
| 85 | -0.003227 | -0.003010 | -0.004725 | -0.010210 | 0.014138  | -0.014691 | 0.052064  | 0.010050  | 0.013627  | 0.017065  | -0.019202 | 0.002100  |
| 86 | 0.001516  | 0.001350  | 0.001291  | 0.002550  | 0.002997  | -0.129985 | 0.032128  | -0.003022 | -0.003439 | -0.000834 | 0.000330  | 0.000912  |

|     |           |           |           |           |           |           |           |           |           |           |           |           |
|-----|-----------|-----------|-----------|-----------|-----------|-----------|-----------|-----------|-----------|-----------|-----------|-----------|
| 87  | 0.002407  | 0.001431  | 0.001247  | 0.001629  | 0.002756  | 0.032352  | -0.132148 | -0.003540 | -0.002962 | 0.000495  | 0.000892  | 0.000712  |
| 88  | -0.009592 | -0.005348 | -0.002988 | -0.003381 | -0.004203 | 0.049965  | -0.017299 | 0.014015  | 0.009759  | -0.017031 | 0.020009  | 0.003276  |
| 89  | -0.001817 | -0.003636 | 0.009304  | 0.002207  | 0.001656  | 0.001552  | 0.002379  | -0.280435 | -0.006853 | -0.005173 | -0.006999 | 0.001171  |
| 90  | 0.002315  | 0.008891  | -0.002611 | -0.002947 | 0.009140  | 0.002095  | 0.001659  | -0.007027 | -0.281094 | -0.006719 | -0.005344 | 0.001184  |
| 91  | 0.001595  | 0.001679  | 0.002306  | 0.009272  | -0.002561 | -0.002668 | 0.009004  | -0.005232 | -0.006511 | -0.279913 | -0.006821 | 0.000515  |
| 92  | 0.008896  | 0.002528  | 0.001709  | 0.001651  | 0.002241  | 0.008952  | -0.002246 | -0.006896 | -0.005155 | -0.006970 | -0.282263 | -0.000032 |
| 93  | -0.013924 | -0.001574 | -0.000865 | -0.000561 | -0.000606 | -0.001157 | -0.001266 | 0.000691  | 0.001493  | 0.001628  | 0.008418  | -0.000815 |
| 94  | -0.018222 | -0.001574 | -0.000799 | -0.000621 | -0.000683 | -0.001243 | -0.001852 | -0.001008 | 0.001540  | 0.001636  | -0.012248 | -0.000667 |
| 95  | 0.068501  | -0.002020 | -0.001298 | -0.000647 | -0.000637 | -0.000702 | -0.001396 | -0.008529 | 0.001658  | 0.001373  | -0.001502 | -0.000416 |
| 96  | 0.062816  | -0.001394 | -0.001194 | -0.000559 | -0.000597 | -0.000792 | -0.001410 | 0.008799  | 0.001717  | 0.001381  | 0.000243  | -0.000533 |
| 97  | -0.001180 | 0.062939  | -0.013884 | -0.001270 | -0.000860 | -0.000536 | -0.000585 | 0.008424  | 0.000283  | 0.001310  | 0.001778  | -0.000363 |
| 98  | -0.001829 | 0.069641  | -0.018308 | -0.001253 | -0.000771 | -0.000590 | -0.000683 | -0.013994 | -0.001560 | 0.001380  | 0.001757  | -0.000496 |
| 99  | -0.001313 | -0.018309 | 0.069672  | -0.001745 | -0.001297 | -0.000631 | -0.000644 | -0.001586 | -0.010857 | 0.001526  | 0.001552  | -0.000487 |
| 100 | -0.001314 | -0.013846 | 0.063110  | -0.001131 | -0.001214 | -0.000553 | -0.000595 | 0.000205  | 0.007340  | 0.001532  | 0.001555  | -0.000484 |
| 101 | -0.000570 | -0.001143 | -0.001218 | 0.062219  | -0.013601 | -0.001278 | -0.000882 | 0.001843  | 0.009432  | 0.000193  | 0.001639  | -0.001661 |
| 102 | -0.000644 | -0.001220 | -0.001779 | 0.068731  | -0.018197 | -0.001280 | -0.000814 | 0.001813  | -0.008763 | -0.001520 | 0.001690  | -0.001734 |
| 103 | -0.000625 | -0.000747 | -0.001383 | -0.018293 | 0.068088  | -0.001753 | -0.001321 | 0.001617  | -0.001246 | -0.010460 | 0.001879  | -0.001220 |
| 104 | -0.000563 | -0.000816 | -0.001379 | -0.013737 | 0.063615  | -0.001155 | -0.001240 | 0.001632  | 0.000453  | 0.007617  | 0.001895  | -0.001514 |
| 105 | -0.000794 | -0.000646 | -0.000598 | -0.001228 | -0.001222 | 0.062227  | -0.013808 | 0.001492  | 0.001704  | 0.009498  | 0.000729  | -0.000498 |
| 106 | -0.000717 | -0.000701 | -0.000694 | -0.001320 | -0.001779 | 0.067778  | -0.018340 | 0.001512  | 0.001728  | -0.008650 | -0.001050 | -0.000351 |
| 107 | -0.001249 | -0.000757 | -0.000638 | -0.000767 | -0.001366 | -0.018464 | 0.069536  | 0.001763  | 0.001477  | -0.001145 | -0.009059 | -0.000484 |
| 108 | -0.001163 | -0.000675 | -0.000604 | -0.000861 | -0.001377 | -0.013910 | 0.062648  | 0.001776  | 0.001463  | 0.000625  | 0.008218  | -0.000340 |
| 109 | -0.031019 | 0.037471  | -0.004614 | -0.000952 | -0.000881 | -0.000774 | -0.001123 | 0.137720  | 0.003117  | 0.002443  | 0.003917  | -0.000658 |
| 110 | 0.032834  | -0.033855 | -0.004671 | -0.001236 | -0.000760 | -0.000767 | -0.001234 | 0.142801  | 0.003693  | 0.002687  | 0.003046  | -0.000534 |
| 111 | -0.000982 | -0.004691 | -0.033037 | 0.032477  | -0.004607 | -0.000959 | -0.000848 | 0.003758  | 0.141362  | 0.003267  | 0.002783  | -0.000278 |
| 112 | -0.001296 | -0.004175 | 0.035524  | -0.029576 | -0.004478 | -0.001097 | -0.000789 | 0.003160  | 0.140067  | 0.003334  | 0.002502  | -0.001011 |
| 113 | -0.000723 | -0.001170 | -0.001136 | -0.004510 | -0.032573 | 0.031615  | -0.004471 | 0.002738  | 0.003451  | 0.140587  | 0.003479  | -0.001322 |
| 114 | -0.000865 | -0.000494 | -0.001168 | -0.004758 | 0.035086  | -0.028936 | -0.004545 | 0.002459  | 0.003024  | 0.139364  | 0.003317  | 0.000780  |
| 115 | -0.004432 | -0.001723 | -0.000961 | -0.000764 | -0.001101 | -0.004311 | -0.033070 | 0.003563  | 0.002516  | 0.003435  | 0.139822  | 0.000336  |
| 116 | -0.004473 | -0.000807 | -0.000743 | -0.000879 | -0.001127 | -0.004631 | 0.035313  | 0.003263  | 0.002604  | 0.003440  | 0.142595  | -0.000390 |
| 117 | -0.000254 | -0.000253 | 0.000141  | -0.000092 | -0.000041 | 0.000206  | 0.000043  | -0.002244 | -0.000299 | 0.002568  | 0.001402  | -0.093662 |
| 118 | -0.000348 | -0.000247 | -0.000109 | -0.000373 | -0.000505 | -0.000134 | -0.000178 | -0.001354 | -0.000560 | -0.000752 | 0.000415  | -0.197870 |
| 119 | -0.000238 | -0.000128 | 0.000026  | 0.000128  | 0.000080  | 0.000041  | -0.000043 | -0.001063 | 0.000104  | 0.000116  | 0.000631  | -0.431855 |
| 120 | -0.000361 | -0.000228 | -0.000216 | -0.000217 | -0.000250 | -0.000205 | -0.000171 | -0.000527 | -0.000320 | -0.000653 | 0.000107  | 0.064934  |
| 121 | 0.000195  | 0.000132  | 0.000134  | 0.000170  | 0.000182  | 0.000144  | 0.000102  | 0.000309  | 0.000212  | 0.000414  | -0.000049 | -0.023981 |
| 122 | 0.000167  | 0.000096  | 0.000080  | 0.000046  | 0.000067  | 0.000061  | 0.000070  | 0.000207  | 0.000103  | 0.000246  | -0.000054 | -0.040899 |
| 123 | -0.000308 | -0.000208 | -0.000154 | -0.000243 | -0.000293 | -0.000228 | -0.000230 | -0.000949 | -0.000060 | -0.000293 | -0.000263 | 0.728523  |
| 124 | -0.000029 | 0.000046  | 0.000093  | 0.000144  | 0.000150  | 0.000119  | 0.000094  | 0.000164  | -0.000053 | 0.000166  | 0.000202  | -0.366197 |
| 125 | 0.000336  | 0.000164  | 0.000064  | 0.000100  | 0.000144  | 0.000110  | 0.000135  | 0.000807  | 0.000120  | 0.000116  | 0.000051  | -0.362351 |
| 126 | 0.000123  | 0.000024  | 0.000062  | -0.000093 | -0.000085 | -0.000040 | -0.000057 | -0.000982 | -0.000286 | 0.000194  | 0.000650  | -0.825199 |
| 127 | -0.000531 | -0.000117 | -0.000068 | -0.000155 | -0.000169 | -0.000145 | -0.000170 | -0.001841 | -0.000489 | -0.000134 | 0.000414  | -0.849706 |
| 128 | -0.000016 | -0.000024 | -0.000059 | -0.000052 | -0.000018 | -0.000016 | -0.000021 | 0.000172  | -0.000057 | -0.000061 | -0.000050 | 0.000782  |
| 129 | 0.000077  | 0.000039  | 0.000049  | 0.000038  | 0.000030  | 0.000042  | 0.000065  | -0.000044 | -0.000026 | 0.000016  | 0.000186  | -0.012741 |
| 130 | 0.000090  | 0.000078  | 0.000073  | 0.000026  | 0.000017  | 0.000023  | 0.000055  | 0.000084  | 0.000039  | -0.000008 | -0.000039 | -0.015060 |
| 131 | -0.000053 | -0.000072 | -0.000033 | -0.000005 | -0.000015 | -0.000014 | -0.000006 | -0.000249 | 0.000013  | 0.000008  | 0.000079  | 0.011978  |
| 132 | -0.000069 | 0.000039  | 0.000017  | -0.000012 | -0.000019 | -0.000015 | -0.000037 | 0.000123  | 0.000033  | -0.000010 | -0.000070 | 0.011918  |
| 133 | -0.000033 | -0.000062 | -0.000049 | 0.000003  | 0.000004  | -0.000021 | -0.000059 | -0.000088 | -0.000002 | 0.000053  | -0.000108 | 0.003949  |
| 134 | -0.002370 | 0.001308  | 0.000375  | -0.000231 | -0.000341 | 0.000806  | 0.001910  | 0.000429  | -0.000688 | -0.002506 | -0.005672 | 0.001697  |
| 135 | 0.001457  | 0.000059  | -0.000012 | -0.000329 | -0.000397 | 0.000117  | 0.000463  | 0.001173  | 0.001055  | 0.001238  | -0.018612 | -0.002421 |
| 136 | 0.001913  | -0.000293 | 0.000187  | -0.000252 | -0.000059 | 0.000094  | -0.000730 | 0.000807  | 0.000811  | 0.000798  | 0.000137  | 0.002002  |

|     |           |           |           |           |           |           |           |           |           |           |           |           |
|-----|-----------|-----------|-----------|-----------|-----------|-----------|-----------|-----------|-----------|-----------|-----------|-----------|
| 137 | 0.002866  | -0.000254 | 0.000337  | -0.000011 | 0.000346  | 0.000615  | 0.000947  | 0.003381  | -0.000697 | -0.001385 | -0.005193 | 0.000180  |
| 138 | 0.002149  | 0.001541  | 0.001456  | 0.000787  | 0.000617  | 0.000892  | 0.001497  | -0.014267 | -0.002812 | -0.002652 | -0.004679 | -0.009600 |
| 139 | -0.002198 | -0.000611 | 0.004167  | 0.001237  | 0.000641  | -0.000453 | -0.000407 | 0.007099  | -0.006103 | -0.000225 | -0.000051 | 0.004740  |
| 140 | -0.000322 | -0.004903 | 0.003230  | 0.001206  | 0.000837  | 0.000367  | 0.001145  | 0.021384  | -0.004476 | -0.001839 | -0.002405 | 0.000663  |
| 141 | 0.000598  | 0.003125  | 0.002585  | 0.000924  | 0.000557  | 0.000073  | 0.000244  | 0.001681  | -0.005913 | -0.000965 | -0.000951 | 0.005478  |
| 142 | -0.000895 | -0.001917 | -0.002435 | -0.000109 | -0.000030 | -0.000277 | -0.000100 | 0.007379  | -0.001696 | 0.000358  | 0.000487  | 0.007620  |
| 143 | -0.001431 | -0.003522 | 0.007835  | 0.000841  | -0.000552 | -0.000852 | -0.000445 | 0.006405  | -0.020099 | 0.001918  | 0.001157  | 0.004473  |
| 144 | -0.000403 | 0.000223  | -0.000995 | 0.004910  | -0.000110 | -0.002471 | -0.000836 | 0.001257  | -0.003678 | 0.008038  | 0.002733  | -0.006325 |
| 145 | -0.000971 | -0.000281 | -0.000636 | 0.000257  | -0.005397 | -0.001594 | -0.000545 | 0.002803  | 0.011023  | 0.007305  | 0.002157  | -0.002013 |
| 146 | -0.000207 | 0.000034  | 0.000257  | -0.002043 | -0.001713 | -0.000818 | -0.000211 | 0.000414  | -0.001023 | 0.005656  | 0.000911  | -0.000710 |
| 147 | 0.000164  | 0.000308  | -0.000066 | 0.000866  | 0.002092  | 0.000554  | -0.000117 | -0.001085 | 0.001857  | -0.000208 | -0.000672 | -0.001172 |
| 148 | 0.000146  | 0.000814  | -0.000165 | 0.000179  | -0.004678 | -0.001413 | -0.000289 | -0.001601 | -0.000639 | 0.019186  | -0.000108 | -0.003949 |
| 149 | 0.000036  | 0.000305  | -0.000181 | -0.000094 | 0.000330  | -0.001827 | 0.003796  | -0.002099 | 0.000455  | 0.002651  | 0.000004  | 0.004292  |
| 150 | 0.000443  | 0.000649  | 0.000282  | 0.000999  | 0.000345  | 0.002954  | -0.000541 | -0.002697 | -0.001903 | -0.014772 | -0.000129 | 0.002934  |
| 151 | 0.000370  | 0.000328  | -0.000142 | 0.000156  | -0.000369 | 0.002437  | -0.002103 | -0.001888 | -0.000658 | 0.001496  | 0.000778  | 0.006240  |
| 152 | 0.000287  | 0.000054  | -0.000318 | -0.000069 | -0.000700 | 0.001405  | -0.002829 | 0.000012  | 0.001210  | 0.001382  | -0.002736 | 0.006161  |
| 153 | 0.000334  | 0.000018  | -0.000316 | -0.000250 | -0.000441 | -0.001785 | -0.002502 | 0.000626  | 0.001652  | 0.003234  | 0.014364  | 0.003349  |
| 154 | -0.000086 | -0.000990 | 0.000872  | 0.000923  | 0.000718  | 0.000568  | 0.001066  | 0.007433  | -0.002046 | -0.002104 | -0.001735 | -0.001076 |
| 155 | -0.001026 | -0.000561 | 0.003530  | 0.001226  | -0.001391 | -0.001078 | -0.000628 | 0.002962  | -0.015114 | 0.003267  | 0.001596  | 0.003050  |
| 156 | 0.000361  | 0.000906  | 0.000106  | 0.000181  | -0.002913 | 0.000738  | -0.000789 | -0.002146 | -0.002226 | 0.004877  | -0.001501 | -0.001647 |
| 157 | 0.000464  | 0.000121  | -0.000122 | -0.000238 | -0.000424 | -0.000185 | 0.000048  | 0.002204  | 0.001069  | 0.003056  | -0.009876 | 0.002833  |
| 158 | 0.000036  | -0.000072 | -0.000013 | 0.000087  | -0.000083 | -0.000125 | 0.000017  | -0.001143 | 0.000293  | -0.000595 | 0.000178  | 0.003143  |
| 159 | -0.000205 | 0.000249  | 0.000387  | 0.000319  | 0.000200  | 0.000034  | -0.000175 | 0.002972  | 0.001276  | -0.001971 | -0.001258 | -0.015016 |
| 160 | -0.000144 | 0.000246  | 0.000327  | 0.000246  | 0.000178  | 0.000048  | -0.000155 | 0.002942  | 0.000967  | -0.001438 | -0.001294 | -0.005299 |
| 161 | 0.000037  | 0.000113  | 0.000049  | -0.000027 | 0.000010  | 0.000060  | -0.000019 | 0.001093  | -0.000350 | 0.000574  | -0.000007 | -0.001329 |
| 162 | 0.000463  | -0.000412 | -0.000356 | 0.000028  | -0.000005 | -0.000047 | -0.000031 | 0.000016  | 0.000139  | 0.000238  | 0.000001  | -0.000273 |
| 163 | -0.000071 | 0.000439  | 0.000216  | -0.000129 | 0.000223  | 0.000346  | -0.000157 | 0.006284  | -0.001578 | 0.003335  | -0.000969 | -0.020794 |
| 164 | -0.000999 | -0.000133 | 0.000051  | -0.000562 | -0.000115 | 0.000181  | -0.000870 | 0.005891  | 0.001698  | 0.001160  | 0.001910  | 0.003913  |
| 165 | -0.003005 | 0.000389  | -0.000274 | -0.000168 | -0.000009 | 0.000050  | 0.000188  | 0.003651  | 0.000171  | -0.000135 | -0.006395 | 0.000650  |
| 166 | -0.000397 | 0.000855  | -0.000763 | -0.000114 | -0.000544 | -0.000960 | -0.001292 | -0.006539 | 0.001170  | 0.002137  | 0.000795  | 0.000402  |
| 167 | 0.000495  | 0.005020  | -0.001454 | 0.001144  | 0.001097  | 0.000255  | 0.000553  | -0.000244 | -0.002492 | -0.001891 | -0.001804 | 0.008979  |
| 168 | -0.000388 | -0.002320 | -0.003886 | -0.000333 | 0.000105  | 0.000138  | 0.000202  | 0.006862  | 0.006028  | -0.000241 | -0.000164 | 0.000021  |
| 169 | 0.001063  | -0.000897 | 0.005478  | -0.000282 | 0.000103  | 0.000528  | 0.000357  | -0.004015 | 0.001092  | -0.000837 | -0.001054 | -0.012266 |
| 170 | 0.000766  | -0.000899 | 0.000717  | -0.000741 | 0.000488  | 0.000901  | 0.001109  | -0.001067 | 0.003972  | -0.004571 | -0.003024 | -0.001144 |
| 171 | 0.000274  | -0.000133 | -0.000426 | 0.001783  | 0.000885  | 0.001232  | 0.000321  | -0.000542 | 0.005141  | -0.008041 | -0.001259 | 0.000804  |
| 172 | 0.000014  | -0.000700 | -0.000339 | -0.000044 | -0.005440 | 0.000433  | 0.000509  | 0.001309  | 0.002860  | -0.001831 | -0.000232 | 0.001828  |
| 173 | 0.000595  | 0.000562  | -0.000244 | 0.000366  | -0.000996 | 0.002816  | -0.000754 | -0.002949 | -0.000962 | 0.003817  | -0.003320 | 0.009988  |
| 174 | 0.000008  | -0.000002 | 0.000040  | 0.000157  | -0.000348 | 0.001981  | 0.002350  | 0.000143  | 0.000097  | -0.003454 | -0.003817 | -0.000087 |
| 175 | -0.000516 | -0.000101 | 0.000577  | 0.000218  | 0.000773  | 0.000086  | -0.001060 | 0.000218  | -0.001907 | -0.006383 | 0.005446  | -0.010019 |
| 176 | 0.015425  | -0.002544 | -0.001354 | -0.000269 | 0.000532  | 0.000474  | 0.002712  | -0.010605 | -0.000706 | -0.003074 | -0.005444 | -0.001065 |
| 177 | -0.004262 | 0.006027  | -0.002929 | -0.001203 | -0.000919 | -0.000662 | 0.000277  | -0.008824 | 0.004772  | 0.001991  | 0.000957  | 0.004323  |
| 178 | -0.002032 | -0.000905 | 0.006514  | -0.003568 | -0.000768 | -0.000063 | -0.000632 | 0.005886  | -0.005092 | 0.001736  | 0.002960  | 0.003623  |
| 179 | -0.000027 | -0.000548 | -0.000707 | 0.008495  | 0.000925  | 0.001130  | 0.000088  | -0.000679 | -0.009250 | -0.003745 | -0.002697 | -0.008072 |
| 180 | 0.000494  | -0.000058 | 0.000103  | 0.000678  | -0.004906 | 0.004276  | 0.000222  | -0.001936 | 0.000726  | 0.003928  | -0.003126 | 0.004125  |
| 181 | 0.000410  | -0.000079 | -0.000312 | 0.000504  | 0.000083  | -0.000911 | 0.002699  | 0.002355  | 0.002900  | 0.011445  | -0.004034 | -0.001122 |
| 182 | -0.000489 | -0.000829 | -0.000334 | -0.000407 | -0.000201 | 0.001425  | -0.012778 | 0.004859  | 0.003256  | 0.000462  | 0.009313  | -0.000271 |
| 183 | -0.001794 | 0.000095  | 0.000715  | 0.000565  | 0.000716  | 0.001438  | 0.005319  | 0.002277  | -0.003028 | -0.005216 | 0.010109  | -0.002204 |
| 184 | -0.000120 | 0.000241  | 0.000277  | 0.000139  | 0.000201  | 0.000246  | -0.000037 | 0.002145  | 0.000274  | -0.000378 | -0.001056 | -0.015460 |
| 185 | -0.000260 | 0.000282  | 0.000383  | 0.000332  | 0.000250  | 0.000122  | -0.000140 | 0.003780  | 0.001457  | -0.002732 | -0.001405 | -0.021018 |
| 186 | 0.000017  | -0.000157 | -0.000100 | 0.000050  | -0.000019 | -0.000062 | 0.000052  | -0.000693 | 0.000099  | 0.000027  | 0.000226  | 0.003361  |

|     |           |           |           |           |           |           |           |           |           |           |           |           |
|-----|-----------|-----------|-----------|-----------|-----------|-----------|-----------|-----------|-----------|-----------|-----------|-----------|
| 187 | 0.000249  | -0.000176 | -0.000297 | -0.000371 | -0.000310 | -0.000154 | 0.000097  | -0.004614 | -0.001336 | 0.002120  | 0.001407  | 0.018511  |
| 188 | 0.000121  | -0.000201 | -0.000277 | -0.000162 | -0.000136 | -0.000152 | 0.000038  | -0.000823 | -0.000559 | 0.001054  | 0.000905  | 0.004388  |
| 189 | -0.000017 | 0.000034  | 0.000012  | 0.000015  | 0.000013  | 0.000005  | -0.000011 | 0.000118  | 0.000019  | 0.000024  | 0.000072  | 0.000355  |
| 190 | 0.005344  | -0.001606 | 0.000206  | 0.000052  | 0.000036  | 0.000025  | 0.000033  | 0.275141  | 0.000175  | 0.000227  | 0.000094  | 0.000466  |
| 191 | -0.002880 | 0.002131  | 0.000385  | 0.000105  | 0.000020  | 0.000065  | 0.000048  | -0.005099 | -0.000076 | 0.000273  | 0.000239  | 0.000431  |
| 192 | 0.002362  | -0.003867 | 0.000012  | 0.000028  | 0.000007  | -0.000011 | -0.000029 | -0.015588 | 0.000174  | 0.000044  | -0.000062 | -0.000206 |
| 193 | -0.003216 | 0.003642  | 0.000083  | 0.000009  | -0.000010 | 0.000004  | 0.000027  | -0.016461 | -0.000155 | -0.000002 | 0.000128  | 0.000005  |
| 194 | 0.002239  | -0.004732 | 0.000293  | 0.000042  | 0.000071  | 0.000048  | 0.000116  | -0.004059 | 0.000070  | 0.000173  | -0.000097 | -0.000272 |
| 195 | -0.000910 | 0.006544  | 0.000234  | 0.000098  | -0.000001 | 0.000007  | -0.000015 | 0.286255  | 0.000221  | 0.000382  | 0.000518  | -0.000393 |
| 196 | 0.000210  | 0.003349  | 0.000048  | 0.000014  | -0.000013 | -0.000017 | -0.000034 | -0.002055 | -0.000020 | 0.000035  | -0.000024 | 0.000114  |
| 197 | -0.000072 | -0.000154 | 0.000146  | 0.000056  | 0.000038  | 0.000025  | 0.000016  | 0.004068  | 0.000001  | 0.000078  | 0.000029  | -0.000091 |
| 198 | -0.000139 | -0.000151 | 0.000035  | 0.000011  | 0.000027  | 0.000040  | 0.000044  | 0.000417  | -0.000013 | 0.000042  | 0.000020  | -0.000115 |
| 199 | -0.000073 | -0.000016 | 0.000079  | 0.000042  | 0.000031  | 0.000026  | 0.000039  | 0.003772  | 0.000000  | 0.000091  | 0.000068  | -0.000116 |
| 200 | 0.001644  | 0.000203  | -0.000004 | 0.000028  | -0.000009 | -0.000024 | -0.000030 | -0.002290 | -0.000096 | 0.000000  | 0.000058  | 0.000096  |
| 201 | 0.000017  | 0.000157  | -0.003230 | 0.005344  | 0.000245  | 0.000041  | 0.000013  | 0.000133  | 0.275481  | 0.000157  | 0.000187  | -0.000261 |
| 202 | 0.000078  | 0.000387  | 0.002608  | -0.002740 | 0.000367  | 0.000118  | 0.000079  | -0.000105 | -0.004508 | 0.000093  | 0.000317  | -0.000090 |
| 203 | -0.000014 | -0.000009 | -0.003246 | 0.001856  | 0.000064  | 0.000025  | -0.000009 | 0.000154  | -0.016670 | -0.000186 | 0.000130  | 0.000285  |
| 204 | 0.000012  | 0.000034  | 0.003366  | -0.003213 | 0.000023  | -0.000009 | 0.000003  | -0.000097 | -0.017722 | 0.000177  | -0.000080 | -0.000172 |
| 205 | 0.000077  | 0.000307  | -0.003653 | 0.001841  | 0.000374  | 0.000072  | 0.000027  | 0.000160  | -0.002187 | 0.000035  | 0.000037  | -0.000875 |
| 206 | -0.000018 | 0.000188  | 0.005901  | 0.000007  | 0.000262  | 0.000128  | 0.000031  | 0.000237  | 0.275150  | 0.000272  | 0.000411  | 0.000390  |
| 207 | -0.000001 | 0.000026  | 0.002023  | 0.000336  | 0.000016  | 0.000005  | -0.000041 | 0.000021  | -0.001830 | -0.000052 | 0.000002  | 0.000076  |
| 208 | 0.000045  | 0.000135  | -0.000101 | -0.000069 | 0.000072  | 0.000029  | 0.000023  | 0.000028  | 0.003770  | -0.000005 | 0.000073  | -0.000121 |
| 209 | 0.000042  | 0.000053  | -0.000160 | -0.000132 | 0.000047  | 0.000025  | 0.000025  | 0.000034  | 0.000496  | 0.000029  | 0.000018  | -0.000132 |
| 210 | 0.000020  | 0.000074  | -0.000064 | -0.000086 | 0.000121  | 0.000047  | 0.000059  | 0.000058  | 0.003917  | 0.000057  | 0.000084  | -0.000251 |
| 211 | -0.000004 | -0.000009 | 0.000155  | 0.001844  | 0.000025  | 0.000019  | -0.000005 | -0.000059 | -0.000923 | -0.000019 | -0.000004 | 0.000420  |
| 212 | 0.000036  | 0.000038  | -0.000022 | 0.000147  | 0.005564  | -0.000353 | 0.000209  | 0.000340  | 0.000222  | 0.280981  | 0.000099  | -0.000091 |
| 213 | 0.000010  | 0.000001  | 0.000073  | 0.000292  | -0.003518 | 0.001990  | 0.000379  | 0.000195  | 0.000187  | -0.003207 | -0.000020 | -0.000083 |
| 214 | -0.000004 | -0.000053 | 0.000021  | 0.000032  | 0.003259  | -0.003188 | 0.000023  | -0.000005 | -0.000041 | -0.017119 | 0.000209  | 0.000409  |
| 215 | 0.000015  | 0.000052  | -0.000022 | -0.000028 | -0.003025 | 0.001921  | 0.000089  | 0.000017  | 0.000144  | -0.016961 | -0.000205 | 0.000430  |
| 216 | 0.000074  | 0.000092  | 0.000097  | 0.000359  | 0.002166  | -0.002873 | 0.000349  | 0.000189  | -0.000011 | -0.004731 | 0.000053  | -0.000339 |
| 217 | -0.000001 | -0.000016 | 0.000027  | 0.000124  | -0.003132 | 0.005796  | 0.000226  | 0.000228  | 0.000357  | 0.272293  | 0.000373  | -0.000303 |
| 218 | -0.000014 | -0.000037 | -0.000010 | -0.000025 | 0.000169  | 0.001933  | 0.000042  | 0.000024  | 0.000052  | -0.002820 | 0.000032  | 0.000200  |
| 219 | 0.000039  | 0.000049  | 0.000016  | 0.000062  | -0.000063 | -0.000092 | 0.000117  | 0.000074  | 0.000038  | 0.003738  | 0.000007  | -0.000034 |
| 220 | 0.000031  | 0.000040  | 0.000037  | 0.000053  | -0.000161 | -0.000153 | 0.000058  | 0.000047  | 0.000032  | 0.000477  | 0.000001  | 0.000026  |
| 221 | 0.000011  | 0.000024  | 0.000060  | 0.000138  | -0.000082 | -0.000054 | 0.000077  | 0.000069  | 0.000069  | 0.003864  | -0.000007 | -0.000268 |
| 222 | -0.000019 | -0.000022 | 0.000006  | 0.000005  | 0.002144  | 0.000350  | 0.000040  | -0.000004 | 0.000081  | -0.001174 | -0.000054 | 0.000406  |
| 223 | 0.000217  | -0.000017 | -0.000013 | 0.000013  | 0.000007  | 0.000136  | -0.001548 | 0.000145  | 0.000520  | 0.000336  | 0.282959  | 0.000059  |
| 224 | 0.000321  | 0.000100  | 0.000078  | 0.000043  | 0.000095  | 0.000400  | 0.002437  | 0.000175  | 0.000074  | -0.000093 | -0.003836 | -0.000199 |
| 225 | 0.000030  | 0.000008  | 0.000005  | 0.000051  | 0.000030  | 0.000039  | -0.003418 | -0.000099 | -0.000122 | 0.000151  | -0.016392 | 0.000102  |
| 226 | 0.000008  | -0.000032 | -0.000001 | -0.000014 | -0.000003 | 0.000057  | 0.002620  | 0.000151  | 0.000115  | -0.000048 | -0.015473 | -0.000084 |
| 227 | 0.000373  | 0.000081  | 0.000011  | 0.000021  | 0.000030  | 0.000290  | -0.003352 | -0.000070 | 0.000425  | 0.000231  | -0.005360 | -0.000433 |
| 228 | 0.000186  | 0.000072  | 0.000039  | 0.000018  | 0.000026  | 0.000251  | 0.005615  | 0.000435  | 0.000086  | 0.000206  | 0.278637  | 0.000188  |
| 229 | 0.000007  | 0.000002  | -0.000017 | -0.000014 | -0.000006 | 0.000004  | 0.001872  | 0.000012  | 0.000052  | 0.000067  | -0.003162 | 0.000214  |
| 230 | 0.000069  | 0.000016  | 0.000045  | 0.000057  | 0.000044  | 0.000129  | -0.000095 | 0.000015  | 0.000105  | 0.000046  | 0.004024  | -0.000161 |
| 231 | 0.000050  | 0.000026  | 0.000027  | 0.000041  | 0.000044  | 0.000064  | -0.000145 | 0.000018  | 0.000036  | 0.000030  | 0.000588  | -0.000142 |
| 232 | 0.000120  | 0.000027  | 0.000032  | 0.000041  | 0.000031  | 0.000085  | -0.000083 | 0.000040  | 0.000059  | 0.000051  | 0.003858  | -0.000096 |
| 233 | 0.000007  | -0.000014 | -0.000010 | -0.000006 | -0.000020 | 0.000008  | 0.000270  | 0.000014  | 0.000014  | -0.000044 | -0.002663 | 0.000176  |
| 234 | -0.004865 | 0.002807  | 0.000588  | 0.000065  | 0.000118  | 0.000124  | 0.000251  | 0.277095  | 0.000394  | 0.000370  | 0.000222  | -0.001317 |
| 235 | 0.003226  | -0.006187 | 0.000490  | 0.000209  | 0.000078  | 0.000104  | 0.000037  | 0.266644  | 0.000094  | 0.000710  | 0.000377  | 0.001071  |
| 236 | 0.001323  | 0.002438  | -0.000431 | -0.000090 | -0.000079 | -0.000088 | -0.000148 | -0.130332 | -0.000071 | -0.000272 | -0.000117 | 0.000453  |



|     |           |           |           |           |           |           |           |           |           |           |           |           |
|-----|-----------|-----------|-----------|-----------|-----------|-----------|-----------|-----------|-----------|-----------|-----------|-----------|
| 237 | 0.001371  | 0.000408  | -0.000262 | -0.000036 | -0.000052 | -0.000042 | -0.000087 | -0.101681 | -0.000081 | -0.000209 | -0.000026 | 0.000142  |
| 238 | -0.000003 | 0.000199  | 0.000074  | 0.000003  | 0.000002  | 0.000000  | 0.000010  | -0.016727 | -0.000041 | -0.000025 | -0.000084 | 0.000032  |
| 239 | 0.000088  | 0.000013  | -0.000050 | -0.000021 | -0.000013 | -0.000021 | -0.000009 | -0.025720 | -0.000081 | -0.000106 | -0.000109 | 0.000003  |
| 240 | -0.001549 | -0.001896 | 0.000154  | 0.000027  | 0.000033  | 0.000045  | 0.000054  | -0.000122 | 0.000034  | 0.000072  | 0.000053  | -0.000089 |
| 241 | -0.001671 | -0.001704 | 0.000141  | 0.000026  | 0.000034  | 0.000046  | 0.000066  | 0.000042  | 0.000023  | 0.000109  | 0.000043  | -0.000063 |
| 242 | 0.000271  | 0.000196  | -0.000096 | -0.000003 | -0.000016 | -0.000020 | -0.000031 | -0.025576 | 0.000006  | -0.000006 | -0.000018 | -0.000019 |
| 243 | 0.000411  | 0.000059  | -0.000029 | 0.000012  | 0.000004  | -0.000001 | -0.000016 | -0.016943 | 0.000050  | 0.000072  | 0.000038  | -0.000085 |
| 244 | 0.000808  | 0.001976  | -0.000244 | -0.000079 | -0.000027 | -0.000043 | -0.000029 | -0.100225 | -0.000133 | -0.000300 | -0.000198 | -0.000134 |
| 245 | 0.000531  | 0.001735  | -0.000334 | -0.000115 | -0.000082 | -0.000103 | -0.000099 | -0.126533 | -0.000192 | -0.000414 | -0.000181 | 0.000008  |
| 246 | 0.000141  | 0.000520  | 0.003835  | -0.003679 | 0.000371  | 0.000073  | 0.000064  | 0.000553  | 0.267666  | 0.000634  | 0.000036  | -0.001362 |
| 247 | 0.000109  | 0.000543  | -0.007656 | 0.002543  | 0.000695  | 0.000244  | 0.000171  | -0.000134 | 0.271457  | -0.000070 | 0.000977  | 0.000102  |
| 248 | -0.000128 | -0.000418 | 0.000522  | 0.001129  | -0.000313 | -0.000080 | -0.000067 | -0.000114 | -0.126135 | -0.000223 | -0.000159 | 0.000800  |
| 249 | -0.000070 | -0.000251 | 0.001070  | 0.001260  | -0.000213 | -0.000025 | -0.000030 | -0.000103 | -0.101019 | -0.000134 | -0.000084 | 0.000686  |
| 250 | 0.000017  | 0.000049  | 0.000761  | 0.000101  | -0.000026 | -0.000022 | -0.000006 | -0.000043 | -0.017432 | -0.000004 | -0.000077 | -0.000147 |
| 251 | 0.000001  | -0.000060 | 0.000606  | 0.000159  | -0.000131 | -0.000058 | -0.000036 | -0.000062 | -0.026082 | -0.000058 | -0.000138 | -0.000086 |
| 252 | 0.000056  | 0.000163  | -0.001836 | -0.001748 | 0.000149  | 0.000038  | 0.000034  | 0.000026  | 0.000361  | 0.000046  | 0.000054  | -0.000300 |
| 253 | 0.000059  | 0.000170  | -0.001658 | -0.001874 | 0.000155  | 0.000031  | 0.000039  | 0.000039  | 0.000385  | 0.000076  | 0.000074  | -0.000379 |
| 254 | -0.000049 | -0.000115 | 0.000203  | 0.000198  | -0.000051 | 0.000011  | 0.000009  | -0.000012 | -0.024753 | -0.000073 | 0.000068  | 0.000446  |
| 255 | -0.000013 | -0.000028 | 0.000110  | 0.000307  | 0.000039  | 0.000033  | 0.000012  | 0.000043  | -0.015915 | -0.000027 | 0.000138  | 0.000152  |
| 256 | -0.000030 | -0.000236 | 0.002164  | 0.000475  | -0.000270 | -0.000104 | -0.000074 | -0.000077 | -0.099854 | -0.000098 | -0.000413 | -0.000431 |
| 257 | -0.000093 | -0.000336 | 0.001933  | 0.001072  | -0.000406 | -0.000142 | -0.000116 | -0.000116 | -0.128761 | -0.000072 | -0.000475 | 0.000521  |
| 258 | 0.000227  | 0.000336  | 0.000135  | 0.000421  | -0.007815 | 0.002793  | 0.000636  | 0.000603  | 0.000252  | 0.267345  | 0.000261  | -0.003399 |
| 259 | -0.000029 | -0.000094 | 0.000116  | 0.000612  | 0.003881  | -0.004074 | 0.000354  | 0.000446  | 0.000175  | 0.273540  | 0.000158  | -0.000277 |
| 260 | -0.000119 | -0.000161 | -0.000118 | -0.000339 | 0.001941  | 0.001045  | -0.000412 | -0.000328 | -0.000117 | -0.127235 | 0.000001  | 0.001261  |
| 261 | -0.000067 | -0.000115 | -0.000030 | -0.000224 | 0.002156  | 0.000557  | -0.000215 | -0.000265 | 0.000000  | -0.099043 | -0.000004 | 0.000859  |
| 262 | 0.000009  | 0.000030  | -0.000002 | -0.000024 | 0.000159  | 0.000282  | 0.000042  | 0.000029  | -0.000049 | -0.016747 | -0.000110 | 0.000012  |
| 263 | 0.000010  | 0.000030  | -0.000031 | -0.000102 | 0.000252  | 0.000142  | -0.000075 | -0.000035 | -0.000048 | -0.025211 | -0.000124 | 0.000155  |
| 264 | 0.000048  | 0.000050  | 0.000045  | 0.000160  | -0.001640 | -0.001835 | 0.000155  | 0.000105  | 0.000027  | 0.000341  | 0.000031  | -0.000348 |
| 265 | 0.000042  | 0.000044  | 0.000041  | 0.000166  | -0.001805 | -0.001713 | 0.000167  | 0.000087  | 0.000007  | 0.000059  | 0.000019  | -0.000258 |
| 266 | -0.000037 | -0.000052 | -0.000007 | -0.000064 | 0.000591  | 0.000104  | -0.000097 | -0.000060 | -0.000038 | -0.025587 | 0.000020  | 0.000004  |
| 267 | -0.000030 | -0.000041 | 0.000035  | 0.000065  | 0.000774  | 0.000038  | -0.000042 | -0.000026 | 0.000010  | -0.016738 | 0.000070  | -0.000384 |
| 268 | -0.000019 | -0.000007 | -0.000066 | -0.000246 | 0.001020  | 0.001296  | -0.000206 | -0.000267 | -0.000102 | -0.102056 | -0.000149 | 0.001395  |
| 269 | -0.000036 | -0.000018 | -0.000119 | -0.000425 | 0.000520  | 0.001320  | -0.000306 | -0.000289 | -0.000117 | -0.128756 | -0.000174 | 0.000984  |
| 270 | 0.000466  | 0.000090  | -0.000011 | -0.000024 | 0.000072  | 0.000513  | 0.003348  | 0.000393  | 0.001205  | 0.000722  | 0.267794  | -0.001162 |
| 271 | 0.000647  | 0.000224  | 0.000223  | 0.000190  | 0.000140  | 0.000478  | -0.005531 | 0.000116  | -0.000055 | -0.000267 | 0.276144  | 0.000166  |
| 272 | -0.000348 | -0.000107 | -0.000056 | -0.000040 | -0.000097 | -0.000389 | 0.000592  | -0.000143 | -0.000555 | -0.000167 | -0.127011 | 0.000637  |
| 273 | -0.000260 | -0.000042 | -0.000031 | -0.000021 | -0.000008 | -0.000192 | 0.001027  | -0.000035 | -0.000483 | -0.000155 | -0.101235 | 0.000347  |
| 274 | -0.000037 | -0.000024 | -0.000016 | -0.000014 | 0.000015  | 0.000040  | 0.000445  | -0.000049 | 0.000152  | 0.000037  | -0.016845 | -0.000060 |
| 275 | -0.000106 | -0.000049 | -0.000027 | -0.000014 | -0.000016 | -0.000080 | 0.000260  | -0.000071 | 0.000096  | -0.000027 | -0.025629 | -0.000002 |
| 276 | 0.000183  | 0.000062  | 0.000042  | 0.000026  | 0.000033  | 0.000143  | -0.001711 | 0.000042  | 0.000119  | 0.000029  | 0.000098  | -0.000338 |
| 277 | 0.000186  | 0.000061  | 0.000041  | 0.000026  | 0.000024  | 0.000144  | -0.001564 | 0.000022  | 0.000104  | 0.000011  | 0.000119  | -0.000294 |
| 278 | -0.000089 | -0.000014 | 0.000007  | 0.000016  | -0.000005 | -0.000072 | 0.000105  | -0.000053 | -0.000222 | -0.000080 | -0.025903 | 0.000220  |
| 279 | 0.000024  | 0.000015  | 0.000008  | 0.000022  | 0.000026  | 0.000013  | 0.000018  | 0.000013  | -0.000149 | -0.000024 | -0.017162 | 0.000141  |
| 280 | -0.000249 | -0.000084 | -0.000068 | -0.000056 | -0.000067 | -0.000252 | 0.001524  | -0.000142 | -0.000063 | 0.000001  | -0.101429 | 0.000075  |
| 281 | -0.000418 | -0.000136 | -0.000112 | -0.000113 | -0.000119 | -0.000344 | 0.001452  | -0.000093 | -0.000148 | -0.000077 | -0.129015 | 0.000267  |
| 282 | 0.010545  | -0.011896 | -0.000065 | -0.000107 | 0.000061  | 0.000031  | -0.000004 | 0.004817  | -0.000098 | -0.000002 | -0.000168 | -0.000465 |
| 283 | -0.002280 | 0.001407  | -0.000010 | -0.000004 | 0.000038  | 0.000024  | 0.000010  | -0.004841 | 0.000133  | 0.000027  | -0.000223 | -0.000002 |
| 284 | 0.000584  | 0.000583  | -0.000028 | 0.000006  | -0.000011 | -0.000004 | 0.000012  | 0.000135  | -0.000050 | 0.000048  | 0.000085  | 0.000066  |
| 285 | -0.001225 | 0.001437  | -0.000078 | -0.000005 | -0.000001 | 0.000002  | 0.000008  | -0.001050 | -0.000012 | 0.000014  | 0.000015  | 0.000157  |
| 286 | -0.000429 | -0.000606 | -0.000076 | 0.000000  | -0.000006 | -0.000007 | -0.000002 | -0.002057 | -0.000022 | -0.000034 | 0.000090  | 0.000119  |

|     |           |           |           |           |           |           |           |           |           |           |           |           |
|-----|-----------|-----------|-----------|-----------|-----------|-----------|-----------|-----------|-----------|-----------|-----------|-----------|
| 287 | 0.001793  | -0.001643 | -0.000102 | 0.000024  | -0.000007 | 0.000007  | 0.000024  | -0.005897 | -0.000133 | 0.000041  | 0.000150  | 0.000414  |
| 288 | 0.000149  | -0.000254 | -0.011603 | 0.009863  | -0.000003 | -0.000001 | -0.000045 | -0.000023 | 0.002998  | 0.000342  | -0.000118 | -0.000184 |
| 289 | 0.000043  | -0.000042 | 0.001592  | -0.002819 | -0.000048 | 0.000024  | -0.000005 | 0.000124  | -0.004622 | -0.000087 | -0.000010 | 0.000060  |
| 290 | -0.000010 | -0.000012 | 0.000472  | 0.000688  | 0.000066  | 0.000012  | 0.000012  | -0.000068 | 0.000312  | 0.000023  | 0.000059  | -0.000100 |
| 291 | -0.000022 | -0.000090 | 0.001446  | -0.001201 | 0.000083  | 0.000006  | 0.000009  | -0.000020 | -0.000914 | -0.000008 | 0.000004  | -0.000042 |
| 292 | -0.000028 | -0.000066 | -0.000304 | -0.000305 | 0.000044  | -0.000010 | 0.000012  | -0.000010 | -0.001762 | 0.000052  | -0.000005 | 0.000034  |
| 293 | -0.000012 | -0.000051 | -0.001887 | 0.001714  | 0.000016  | 0.000012  | 0.000018  | -0.000168 | -0.004629 | 0.000087  | 0.000057  | -0.000015 |
| 294 | 0.000010  | -0.000335 | 0.000025  | 0.000071  | -0.011276 | 0.009633  | 0.000077  | 0.000053  | -0.000075 | 0.003168  | 0.000417  | -0.000134 |
| 295 | -0.000022 | -0.000078 | 0.000004  | 0.000097  | 0.001646  | -0.001641 | -0.000007 | -0.000033 | 0.000136  | 0.005629  | -0.000024 | -0.000236 |
| 296 | 0.000012  | 0.000038  | -0.000019 | -0.000080 | -0.000307 | -0.000290 | 0.000045  | -0.000034 | -0.000079 | -0.002042 | 0.000054  | 0.000134  |
| 297 | 0.000015  | 0.000003  | -0.000018 | -0.000083 | 0.001401  | -0.001189 | 0.000084  | 0.000001  | -0.000028 | -0.000917 | 0.000003  | 0.000092  |
| 298 | 0.000019  | 0.000034  | -0.000005 | -0.000043 | 0.000465  | 0.000725  | 0.000069  | 0.000043  | -0.000067 | 0.000315  | -0.000018 | -0.000027 |
| 299 | -0.000001 | 0.000068  | -0.000009 | -0.000005 | -0.001593 | 0.002662  | 0.000055  | -0.000053 | -0.000171 | 0.004988  | 0.000092  | 0.000055  |
| 300 | -0.000045 | 0.000391  | 0.000122  | 0.000013  | -0.000013 | -0.000013 | 0.011038  | -0.000353 | -0.000259 | 0.000172  | 0.002943  | 0.000014  |
| 301 | 0.000073  | 0.000071  | 0.000026  | 0.000000  | -0.000014 | -0.000008 | -0.001720 | 0.000105  | -0.000088 | -0.000097 | 0.004874  | 0.000149  |
| 302 | -0.000081 | -0.000057 | -0.000023 | -0.000005 | 0.000012  | 0.000060  | -0.000407 | -0.000043 | -0.000013 | 0.000072  | -0.001660 | -0.000062 |
| 303 | -0.000092 | -0.000022 | -0.000010 | -0.000003 | 0.000022  | 0.000091  | -0.001339 | -0.000001 | 0.000003  | 0.000007  | -0.000848 | -0.000005 |
| 304 | -0.000034 | -0.000039 | -0.000018 | -0.000005 | 0.000021  | 0.000084  | 0.000602  | -0.000049 | 0.000063  | 0.000008  | 0.000253  | -0.000059 |
| 305 | 0.000014  | -0.000107 | -0.000042 | -0.000014 | -0.000002 | 0.000103  | 0.002272  | -0.000072 | 0.000027  | 0.000135  | 0.004281  | 0.000072  |
| 306 | 0.013444  | 0.019382  | 0.000065  | 0.000015  | 0.000054  | 0.000050  | 0.000069  | 0.041608  | 0.000750  | 0.000084  | 0.000193  | 0.000652  |
| 307 | 0.000774  | -0.002230 | -0.000236 | -0.000063 | 0.000048  | 0.000025  | 0.000019  | -0.001182 | 0.000113  | -0.000009 | -0.000178 | 0.000264  |
| 308 | 0.001714  | -0.000321 | 0.000061  | -0.000002 | 0.000007  | 0.000020  | 0.000003  | -0.000279 | -0.000114 | 0.000047  | -0.000005 | -0.000222 |
| 309 | 0.000995  | -0.001589 | 0.000038  | -0.000002 | -0.000017 | -0.000030 | -0.000008 | 0.003244  | 0.000038  | -0.000026 | 0.000017  | -0.000139 |
| 310 | -0.001296 | 0.001097  | 0.000002  | -0.000005 | 0.000004  | 0.000007  | -0.000014 | 0.001727  | 0.000019  | -0.000022 | 0.000030  | 0.000070  |
| 311 | -0.000223 | 0.002167  | -0.000051 | 0.000007  | -0.000002 | 0.000009  | 0.000029  | -0.002789 | -0.000018 | 0.000055  | -0.000051 | 0.000092  |
| 312 | -0.001866 | 0.000806  | 0.000186  | 0.000064  | -0.000040 | -0.000031 | -0.000029 | -0.000699 | -0.000040 | -0.000045 | 0.000186  | -0.000066 |
| 313 | 0.000094  | 0.000116  | 0.017581  | 0.011451  | 0.000147  | 0.000043  | -0.000023 | 0.000452  | 0.040146  | 0.000420  | -0.000045 | -0.000293 |
| 314 | 0.000038  | -0.000342 | -0.001405 | 0.000738  | 0.000177  | 0.000028  | -0.000017 | 0.000145  | -0.001467 | 0.000050  | -0.000130 | -0.000118 |
| 315 | 0.000019  | 0.000036  | -0.000753 | 0.001543  | -0.000037 | 0.000025  | 0.000001  | -0.000117 | -0.000162 | 0.000054  | 0.000058  | -0.000052 |
| 316 | 0.000010  | 0.000060  | -0.001460 | 0.000968  | -0.000034 | -0.000042 | -0.000003 | 0.000052  | 0.002896  | -0.000010 | -0.000006 | 0.000013  |
| 317 | -0.000019 | -0.000021 | 0.001153  | -0.001172 | 0.000037  | 0.000011  | -0.000004 | 0.000013  | 0.001479  | 0.000023  | -0.000034 | 0.000018  |
| 318 | -0.000009 | -0.000029 | 0.002014  | 0.000101  | 0.000059  | 0.000030  | 0.000004  | -0.000024 | -0.002714 | -0.000098 | 0.000032  | -0.000112 |
| 319 | -0.000039 | 0.000297  | 0.000411  | -0.002117 | -0.000202 | -0.000050 | 0.000019  | -0.000071 | -0.000036 | -0.000020 | 0.000083  | 0.000254  |
| 320 | -0.000002 | 0.000019  | -0.000010 | -0.000069 | -0.017683 | -0.012749 | -0.000112 | -0.000152 | -0.000719 | -0.038048 | -0.000392 | -0.000980 |
| 321 | 0.000013  | -0.000160 | -0.000019 | -0.000130 | -0.000354 | 0.002217  | 0.000233  | 0.000050  | 0.000061  | -0.000198 | 0.000041  | 0.000141  |
| 322 | -0.000001 | -0.000035 | 0.000000  | 0.000053  | -0.001995 | -0.000177 | -0.000053 | -0.000048 | -0.000033 | 0.002508  | 0.000155  | 0.000010  |
| 323 | 0.000002  | 0.000018  | 0.000016  | 0.000013  | -0.001108 | 0.001166  | -0.000031 | 0.000024  | -0.000005 | -0.001575 | -0.000044 | -0.000103 |
| 324 | 0.000007  | -0.000014 | -0.000014 | -0.000046 | 0.001455  | -0.000958 | 0.000021  | 0.000042  | 0.000008  | -0.003042 | -0.000035 | 0.000053  |
| 325 | -0.000008 | 0.000037  | -0.000009 | -0.000058 | 0.000798  | -0.001444 | 0.000033  | -0.000078 | 0.000041  | 0.000027  | 0.000009  | 0.000277  |
| 326 | -0.000014 | 0.000156  | 0.000025  | 0.000168  | 0.001268  | -0.000889 | -0.000204 | 0.000010  | -0.000072 | 0.002296  | -0.000127 | -0.000376 |
| 327 | -0.000037 | -0.000070 | 0.000005  | 0.000001  | -0.000022 | -0.000114 | -0.014738 | -0.000503 | -0.000007 | -0.000588 | -0.048999 | 0.000636  |
| 328 | -0.000185 | 0.000155  | 0.000042  | 0.000000  | 0.000030  | 0.000196  | 0.001966  | -0.000023 | -0.000087 | -0.000096 | -0.000028 | 0.000054  |
| 329 | 0.000030  | 0.000030  | 0.000022  | 0.000010  | -0.000011 | -0.000050 | 0.000240  | -0.000040 | -0.000089 | 0.000130  | 0.003133  | -0.000022 |
| 330 | 0.000026  | 0.000013  | -0.000005 | -0.000012 | -0.000006 | -0.000042 | 0.001406  | -0.000044 | 0.000041  | -0.000039 | -0.001841 | -0.000045 |
| 331 | -0.000055 | 0.000004  | 0.000000  | 0.000016  | 0.000018  | 0.000008  | -0.001093 | -0.000001 | 0.000012  | -0.000012 | -0.002945 | 0.000006  |
| 332 | -0.000049 | -0.000053 | -0.000007 | -0.000009 | -0.000008 | 0.000052  | -0.001786 | 0.000115  | -0.000026 | -0.000012 | 0.000632  | -0.000030 |
| 333 | 0.000232  | -0.000150 | -0.000053 | -0.000004 | -0.000022 | -0.000164 | -0.000803 | -0.000006 | 0.000146  | 0.000027  | 0.001011  | 0.000039  |

49

50

51

52

53

54

55

56

57

58

59

60

|    |           |           |           |           |           |           |           |           |           |           |           |           |
|----|-----------|-----------|-----------|-----------|-----------|-----------|-----------|-----------|-----------|-----------|-----------|-----------|
| 1  | 0.005304  | -0.037734 | 0.012156  | 0.021575  | 0.001263  | 0.001922  | 0.001709  | 0.001345  | 0.000627  | 0.000935  | 0.000776  | 0.399000  |
| 2  | 0.015063  | -0.032787 | 0.031099  | 0.001127  | 0.001221  | 0.003742  | -0.002762 | 0.001297  | 0.001201  | 0.002616  | 0.002741  | 0.403000  |
| 3  | -0.003052 | -0.007396 | -0.004909 | 0.014320  | -0.000579 | 0.000188  | 0.001017  | 0.002160  | 0.000037  | -0.000058 | -0.000167 | 0.034931  |
| 4  | 0.002797  | 0.004836  | 0.001619  | -0.005304 | 0.000135  | 0.000092  | 0.000866  | 0.001800  | 0.000053  | -0.000332 | 0.000108  | 0.035886  |
| 5  | -0.001087 | -0.003352 | 0.000562  | 0.000434  | 0.002210  | 0.000190  | 0.001407  | -0.000329 | -0.000336 | -0.000232 | -0.000069 | 0.017904  |
| 6  | 0.001922  | -0.002337 | 0.001996  | -0.001358 | 0.002171  | 0.000297  | 0.001242  | -0.000504 | -0.000083 | 0.000179  | -0.000367 | 0.015741  |
| 7  | -0.054496 | 0.001982  | -0.072289 | 0.224500  | -0.023090 | -0.005916 | -0.005884 | -0.026377 | -0.001759 | -0.001936 | -0.001897 | 0.154489  |
| 8  | -0.000809 | -0.012010 | -0.006397 | 0.019219  | -0.000502 | -0.000750 | 0.002901  | 0.005520  | -0.000007 | -0.000519 | -0.000629 | 0.006591  |
| 9  | -0.003286 | -0.018473 | -0.009152 | 0.028460  | -0.000065 | -0.001100 | 0.003068  | -0.003819 | -0.000061 | -0.000505 | -0.000718 | 0.004965  |
| 10 | -0.000679 | -0.001403 | -0.001638 | 0.012580  | -0.000020 | -0.000256 | 0.001582  | 0.002529  | 0.000093  | -0.000618 | -0.000212 | 0.004867  |
| 11 | -0.000270 | 0.002499  | -0.002089 | 0.008742  | 0.000311  | -0.000282 | 0.001375  | 0.002372  | -0.000152 | -0.000487 | -0.000418 | 0.007451  |
| 12 | -0.002313 | 0.000185  | 0.000265  | -0.008253 | 0.003240  | -0.000110 | 0.001004  | -0.000014 | -0.000507 | -0.000761 | -0.000802 | 0.007654  |
| 13 | -0.002037 | -0.000459 | 0.000892  | -0.009058 | -0.005088 | -0.000182 | 0.000578  | 0.000265  | -0.000551 | -0.000685 | -0.000891 | -0.004768 |
| 14 | -0.000070 | 0.002929  | -0.001958 | 0.001215  | 0.002374  | -0.000227 | 0.001253  | 0.000433  | -0.000331 | -0.000606 | -0.000470 | -0.006599 |
| 15 | -0.000015 | 0.006166  | -0.003583 | 0.001147  | 0.001842  | -0.000229 | 0.001369  | -0.000311 | -0.000394 | -0.000579 | -0.000814 | 0.007100  |
| 16 | 0.003717  | 0.003803  | 0.005734  | -0.006104 | 0.000046  | 0.000515  | 0.000063  | 0.002682  | 0.000226  | 0.000309  | 0.000088  | -0.006938 |
| 17 | -0.003711 | -0.014775 | -0.003661 | 0.012140  | 0.000074  | -0.000577 | 0.001104  | -0.003763 | 0.000139  | 0.000017  | -0.000486 | 0.001815  |
| 18 | 0.001792  | -0.001516 | 0.003126  | -0.006283 | -0.000140 | 0.000435  | -0.000081 | -0.005203 | 0.000034  | -0.000048 | 0.000289  | -0.003998 |
| 19 | 0.001241  | -0.005360 | 0.003536  | -0.001656 | -0.000266 | 0.000283  | -0.000245 | -0.000386 | 0.000201  | 0.000191  | 0.000189  | -0.005047 |
| 20 | -0.000528 | 0.003909  | -0.000238 | 0.006200  | 0.000718  | -0.000100 | 0.000476  | 0.002560  | 0.000148  | -0.000396 | 0.000298  | 0.003360  |
| 21 | 0.001962  | -0.004012 | 0.002994  | -0.001714 | -0.000069 | 0.000390  | 0.000092  | -0.000975 | 0.000056  | 0.000218  | 0.000100  | -0.008126 |
| 22 | 0.002321  | -0.004523 | 0.003086  | 0.003936  | 0.001449  | 0.000432  | 0.000071  | -0.000211 | 0.000198  | 0.000215  | 0.000277  | -0.006013 |
| 23 | -0.001568 | 0.000510  | -0.000615 | -0.006867 | -0.002030 | -0.000029 | 0.000329  | 0.000610  | -0.000472 | -0.000403 | -0.000420 | 0.000964  |
| 24 | 0.001205  | -0.005109 | 0.002339  | 0.003020  | -0.003074 | 0.000311  | 0.000174  | -0.000336 | 0.000169  | 0.000209  | 0.000250  | -0.003577 |
| 25 | 0.001289  | -0.006875 | 0.003578  | 0.000155  | -0.000153 | 0.000337  | 0.000026  | -0.000686 | 0.000055  | 0.000174  | 0.000282  | -0.004910 |
| 26 | 0.001309  | 0.008142  | -0.002443 | -0.002634 | 0.002051  | -0.000034 | 0.000674  | 0.001397  | -0.000331 | -0.000221 | -0.000391 | 0.001861  |
| 27 | 0.002044  | -0.005244 | 0.004248  | 0.001178  | -0.000557 | 0.000362  | 0.000069  | -0.000232 | 0.000209  | 0.000342  | 0.000230  | -0.007139 |
| 28 | -0.001438 | -0.013279 | -0.001186 | 0.004913  | 0.000462  | 0.000220  | 0.000967  | -0.006977 | 0.000114  | -0.000057 | -0.000161 | -0.010906 |
| 29 | -0.000508 | -0.009215 | 0.000692  | 0.012457  | -0.000009 | 0.000251  | 0.000854  | 0.001848  | 0.000276  | -0.000216 | 0.000296  | -0.010395 |
| 30 | 0.001591  | -0.000025 | 0.002714  | 0.001523  | 0.002445  | 0.000361  | 0.000423  | 0.000362  | 0.000021  | -0.000110 | 0.000000  | -0.007986 |
| 31 | 0.001423  | -0.006990 | 0.002265  | 0.004537  | 0.000495  | 0.000478  | 0.000926  | 0.000458  | -0.000112 | -0.000169 | 0.000006  | -0.009496 |
| 32 | 0.000298  | -0.005440 | 0.001879  | -0.001194 | -0.004373 | 0.000253  | 0.001033  | 0.000840  | -0.000178 | -0.000147 | -0.000155 | -0.000360 |
| 33 | 0.001857  | -0.002546 | 0.002437  | -0.001670 | 0.001122  | 0.000280  | 0.000807  | 0.000154  | -0.000136 | -0.000021 | -0.000024 | -0.001673 |
| 34 | 0.003726  | 0.000977  | 0.002579  | 0.003550  | 0.000543  | 0.000333  | 0.001230  | 0.003613  | -0.000058 | 0.000201  | -0.000123 | -0.009327 |
| 35 | 0.002089  | -0.002363 | 0.003651  | 0.000526  | -0.000147 | 0.000229  | 0.001086  | 0.000190  | 0.000203  | 0.000095  | -0.000183 | -0.008625 |
| 36 | 0.000225  | 0.000068  | 0.000889  | -0.000796 | 0.000016  | 0.000056  | -0.000145 | 0.000110  | 0.000065  | 0.000126  | 0.000024  | -0.000623 |
| 37 | 0.000012  | -0.000307 | 0.000815  | -0.000927 | 0.000013  | 0.000055  | -0.000259 | -0.000037 | 0.000040  | 0.000073  | 0.000070  | -0.000306 |
| 38 | 0.000140  | -0.000118 | 0.000657  | -0.000439 | 0.000022  | 0.000051  | -0.000154 | 0.000046  | 0.000063  | 0.000032  | 0.000119  | -0.000193 |
| 39 | 0.000303  | 0.000071  | 0.000582  | -0.000436 | 0.000077  | 0.000074  | -0.000141 | 0.000059  | 0.000040  | 0.000036  | 0.000098  | -0.000559 |
| 40 | 0.000372  | -0.000103 | 0.000321  | -0.000240 | 0.000037  | 0.000069  | -0.000117 | 0.000066  | 0.000012  | 0.000031  | 0.000057  | 0.000380  |
| 41 | 0.000277  | -0.000224 | 0.000248  | -0.000207 | -0.000124 | 0.000054  | -0.000062 | 0.000022  | -0.000003 | 0.000031  | 0.000039  | 0.000253  |
| 42 | 0.000376  | -0.000090 | 0.000398  | -0.000437 | 0.000049  | 0.000064  | -0.000063 | 0.000038  | -0.000001 | 0.000043  | 0.000033  | 0.000331  |
| 43 | 0.000323  | 0.000000  | 0.000517  | -0.000278 | 0.000053  | 0.000063  | -0.000046 | 0.000036  | -0.000019 | 0.000086  | 0.000035  | 0.000418  |
| 44 | 0.000058  | -0.001698 | 0.000726  | -0.000767 | -0.000023 | 0.000015  | 0.000312  | -0.000934 | 0.000088  | -0.000103 | 0.000073  | -0.000123 |
| 45 | 0.001013  | -0.000466 | 0.000776  | -0.000077 | 0.000314  | 0.000198  | 0.000248  | 0.000038  | -0.000116 | -0.000076 | -0.000002 | 0.000261  |
| 46 | 0.000381  | -0.000690 | 0.000306  | -0.000776 | -0.001085 | 0.000104  | 0.000241  | 0.000021  | -0.000059 | -0.000044 | -0.000038 | -0.002029 |
| 47 | 0.001137  | 0.000855  | 0.001115  | -0.000152 | 0.000094  | 0.000042  | 0.000557  | 0.000295  | 0.000063  | 0.000069  | -0.000125 | 0.000200  |
| 48 | 0.103127  | 0.437758  | 1.132180  | 0.573860  | 0.092528  | 0.002262  | -0.019415 | -0.071890 | -0.000480 | -0.017335 | -0.018392 | 0.001603  |
| 49 | 5.849060  | 0.352186  | 1.199470  | 1.239690  | 0.054889  | 0.022334  | 0.048332  | 0.010748  | 0.000500  | 0.010692  | 0.011465  | 0.000798  |
| 50 | 0.352186  | 6.001710  | 0.195927  | 0.580414  | 0.024867  | 0.042096  | 0.119681  | 0.035333  | -0.018749 | -0.005357 | -0.007401 | 0.003285  |

|     |           |           |           |           |           |           |           |           |           |           |           |           |
|-----|-----------|-----------|-----------|-----------|-----------|-----------|-----------|-----------|-----------|-----------|-----------|-----------|
| 51  | 1.199470  | 0.195927  | 5.201730  | 0.082442  | -0.003862 | 0.005636  | 0.133259  | 0.067634  | -0.002276 | -0.031403 | -0.031229 | 0.003922  |
| 52  | 1.239690  | 0.580414  | 0.082442  | 6.365120  | -0.050148 | -0.009517 | 0.000023  | 0.074550  | 0.005832  | 0.018242  | 0.019570  | -0.007058 |
| 53  | 0.054889  | 0.024867  | -0.003862 | -0.050148 | 5.596940  | 0.005036  | 0.000960  | 0.000342  | -0.000645 | -0.000196 | -0.000182 | -0.000910 |
| 54  | 0.022334  | 0.042096  | 0.005636  | -0.009517 | 0.005036  | 5.583720  | 0.005954  | 0.000000  | -0.001207 | 0.003430  | 0.003176  | 0.000236  |
| 55  | 0.048332  | 0.119681  | 0.133259  | 0.000023  | 0.000960  | 0.005954  | 4.974380  | 0.013609  | 0.080577  | 0.154410  | 0.161224  | -0.001608 |
| 56  | 0.010748  | 0.035333  | 0.067634  | 0.074550  | 0.000342  | 0.000000  | 0.013609  | 5.574180  | 0.004065  | -0.000644 | -0.000514 | -0.000093 |
| 57  | 0.000500  | -0.018749 | -0.002276 | 0.005832  | -0.000645 | -0.001207 | 0.080577  | 0.004065  | 5.155460  | 0.034004  | 0.035001  | 0.000057  |
| 58  | 0.010692  | -0.005357 | -0.031403 | 0.018242  | -0.000196 | 0.003430  | 0.154410  | -0.000644 | 0.034004  | 5.027150  | 0.050789  | -0.000090 |
| 59  | 0.011465  | -0.007401 | -0.031229 | 0.019570  | -0.000182 | 0.003176  | 0.161224  | -0.000514 | 0.035001  | 0.050789  | 5.015100  | 0.000093  |
| 60  | 0.000798  | 0.003285  | 0.003922  | -0.007058 | -0.000910 | 0.000236  | -0.001608 | -0.000093 | 0.000057  | -0.000090 | 0.000093  | 0.773000  |
| 61  | 0.010167  | 0.064816  | 0.004297  | -0.080566 | 0.013723  | -0.001840 | -0.000759 | 0.013235  | -0.001570 | 0.000214  | -0.002780 | 0.020978  |
| 62  | -0.006847 | -0.014856 | -0.003628 | 0.032319  | -0.006180 | -0.000269 | 0.000342  | -0.004632 | 0.001048  | -0.001366 | 0.001329  | 0.025805  |
| 63  | -0.003109 | -0.023089 | -0.000155 | 0.032353  | -0.004108 | -0.000407 | 0.002547  | -0.002126 | 0.001279  | -0.001167 | 0.001286  | -0.035119 |
| 64  | 0.006808  | 0.043440  | -0.001715 | -0.047777 | 0.010339  | -0.001316 | 0.000623  | 0.011291  | -0.001353 | 0.000340  | -0.002156 | -0.036575 |
| 65  | -0.031007 | -0.039222 | -0.005737 | 0.029248  | 0.020601  | 0.001985  | -0.007552 | -0.016303 | -0.002104 | 0.001788  | 0.000011  | 0.054917  |
| 66  | -0.006583 | -0.049953 | 0.001498  | 0.045374  | -0.008778 | 0.001875  | -0.001292 | -0.012083 | 0.000669  | 0.000030  | 0.002216  | 0.038551  |
| 67  | 0.024021  | -0.002507 | 0.001603  | 0.018969  | -0.030352 | 0.000267  | 0.005770  | 0.005230  | 0.002396  | -0.000837 | 0.001496  | -0.010389 |
| 68  | 0.006446  | 0.021387  | 0.003787  | -0.029948 | 0.004770  | -0.000283 | 0.000272  | 0.005462  | -0.000386 | 0.001006  | -0.001397 | -0.007173 |
| 69  | -0.002513 | -0.006672 | -0.000995 | 0.005937  | 0.000460  | 0.000157  | -0.000239 | -0.004009 | 0.000092  | 0.000100  | 0.000038  | 0.002979  |
| 70  | -0.000713 | -0.003240 | 0.000562  | 0.004544  | 0.000557  | 0.000138  | -0.000179 | 0.000676  | 0.000042  | -0.000029 | 0.000124  | -0.002265 |
| 71  | 0.000227  | 0.000686  | -0.001613 | 0.000950  | -0.002490 | 0.000092  | 0.000008  | 0.000828  | -0.000070 | 0.000044  | 0.000048  | 0.007244  |
| 72  | 0.002368  | 0.002846  | 0.002150  | -0.005641 | 0.000205  | -0.000038 | 0.000159  | 0.000903  | -0.000010 | 0.000065  | 0.000001  | -0.003822 |
| 73  | 0.001178  | 0.004040  | -0.000504 | 0.002259  | 0.000075  | 0.000067  | 0.000284  | 0.002804  | -0.000090 | -0.000068 | -0.000009 | 0.002561  |
| 74  | -0.001447 | -0.004994 | -0.003994 | 0.009808  | -0.000005 | -0.000460 | 0.001102  | 0.000510  | -0.000064 | -0.000210 | -0.000315 | -0.000146 |
| 75  | -0.001352 | -0.004252 | -0.004130 | 0.008918  | -0.000037 | -0.000473 | 0.001022  | 0.000718  | -0.000116 | -0.000273 | -0.000303 | 0.000824  |
| 76  | 0.002108  | -0.000939 | 0.000413  | 0.002002  | -0.000627 | 0.000081  | 0.000593  | 0.002139  | 0.000069  | -0.000224 | 0.000192  | 0.009080  |
| 77  | 0.001878  | -0.003435 | 0.002301  | -0.002448 | -0.000385 | -0.000041 | 0.000290  | -0.000494 | 0.000043  | 0.000038  | -0.000149 | 0.008264  |
| 78  | -0.001326 | 0.001616  | -0.002156 | 0.004890  | 0.000161  | -0.000197 | 0.000457  | 0.001212  | -0.000070 | -0.000252 | -0.000194 | 0.001216  |
| 79  | -0.001105 | 0.000663  | -0.002281 | 0.005646  | 0.000267  | -0.000180 | 0.000640  | 0.001037  | -0.000063 | -0.000241 | -0.000197 | 0.000060  |
| 80  | 0.000960  | -0.000619 | -0.000278 | -0.001586 | -0.000754 | 0.000059  | 0.000189  | -0.001133 | -0.000123 | 0.000059  | -0.000257 | 0.002132  |
| 81  | 0.001444  | 0.001329  | 0.001594  | -0.000641 | 0.000832  | 0.000081  | 0.000022  | -0.000178 | 0.000095  | 0.000039  | -0.000060 | 0.018085  |
| 82  | -0.001614 | 0.000915  | -0.001033 | -0.002802 | -0.000091 | -0.000184 | 0.000284  | 0.000134  | -0.000237 | -0.000293 | -0.000360 | -0.005362 |
| 83  | -0.001706 | 0.001294  | -0.001389 | -0.002829 | -0.000074 | -0.000218 | 0.000301  | 0.000126  | -0.000232 | -0.000322 | -0.000374 | -0.003363 |
| 84  | -0.000186 | -0.003740 | 0.001801  | 0.001567  | 0.000434  | 0.000078  | -0.000061 | -0.000961 | 0.000112  | 0.000008  | 0.000098  | 0.001697  |
| 85  | -0.000074 | -0.005145 | 0.002682  | -0.000519 | -0.000412 | 0.000057  | -0.000149 | -0.000948 | 0.000002  | 0.000003  | 0.000034  | 0.001065  |
| 86  | -0.000632 | 0.003938  | -0.002954 | 0.000185  | 0.000876  | -0.000237 | 0.000550  | 0.000383  | -0.000203 | -0.000322 | -0.000275 | -0.003824 |
| 87  | -0.000363 | 0.004211  | -0.002342 | -0.001078 | 0.000904  | -0.000199 | 0.000478  | 0.000583  | -0.000169 | -0.000300 | -0.000275 | -0.005894 |
| 88  | -0.001065 | -0.005273 | 0.001197  | 0.006530  | -0.000622 | 0.000033  | 0.000094  | -0.001858 | 0.000224  | 0.000026  | -0.000048 | 0.017879  |
| 89  | -0.000318 | -0.002373 | 0.000160  | 0.001727  | 0.000162  | 0.000130  | -0.000452 | 0.000081  | 0.000030  | 0.000071  | 0.000125  | -0.005003 |
| 90  | 0.000456  | -0.001177 | 0.001134  | 0.000690  | 0.000424  | 0.000120  | -0.000147 | 0.000285  | 0.000077  | 0.000095  | 0.000131  | -0.005616 |
| 91  | 0.000572  | -0.001245 | 0.000743  | 0.000260  | 0.000749  | 0.000071  | -0.000077 | 0.000227  | 0.000019  | 0.000084  | 0.000068  | -0.000714 |
| 92  | 0.001255  | 0.000181  | 0.001575  | -0.000260 | 0.000197  | 0.000139  | -0.000223 | 0.000975  | 0.000103  | 0.000218  | 0.000082  | -0.005696 |
| 93  | 0.000988  | 0.002699  | 0.002320  | -0.005247 | 0.000009  | 0.000271  | -0.000532 | -0.000274 | 0.000064  | 0.000141  | 0.000159  | -0.000311 |
| 94  | 0.000458  | 0.002286  | 0.001678  | -0.004557 | -0.000004 | 0.000189  | -0.000571 | -0.000235 | 0.000000  | 0.000070  | 0.000157  | 0.000459  |
| 95  | 0.000489  | 0.002009  | 0.001725  | -0.004018 | 0.000022  | 0.000202  | -0.000477 | -0.000423 | 0.000042  | 0.000146  | 0.000105  | -0.000148 |
| 96  | 0.000867  | 0.002179  | 0.002423  | -0.004895 | 0.000021  | 0.000271  | -0.000546 | -0.000319 | 0.000075  | 0.000129  | 0.000197  | -0.000634 |
| 97  | 0.000730  | -0.001178 | 0.001402  | -0.002642 | -0.000082 | 0.000121  | -0.000310 | -0.000688 | 0.000055  | 0.000144  | 0.000123  | -0.000871 |
| 98  | 0.000589  | -0.000473 | 0.000745  | -0.002192 | -0.000089 | 0.000078  | -0.000147 | -0.000529 | 0.000015  | 0.000108  | 0.000072  | -0.000327 |
| 99  | 0.000315  | -0.000069 | 0.000948  | -0.002754 | -0.000130 | 0.000051  | -0.000343 | -0.000466 | 0.000030  | 0.000103  | 0.000083  | 0.000337  |
| 100 | 0.000824  | -0.000490 | 0.001350  | -0.003062 | -0.000114 | 0.000126  | -0.000293 | -0.000553 | 0.000034  | 0.000136  | 0.000108  | -0.000438 |

|     |           |           |           |           |           |           |           |           |           |           |           |           |
|-----|-----------|-----------|-----------|-----------|-----------|-----------|-----------|-----------|-----------|-----------|-----------|-----------|
| 101 | 0.000945  | -0.000643 | 0.000763  | 0.001581  | 0.000031  | 0.000129  | -0.000163 | -0.000064 | 0.000128  | 0.000163  | 0.000218  | 0.002984  |
| 102 | 0.000643  | -0.000266 | 0.000240  | 0.001273  | 0.000066  | 0.000052  | -0.000123 | -0.000076 | 0.000110  | 0.000132  | 0.000144  | 0.002344  |
| 103 | 0.000674  | -0.000434 | 0.000490  | 0.001303  | -0.000010 | 0.000081  | -0.000142 | -0.000070 | 0.000113  | 0.000142  | 0.000167  | 0.001544  |
| 104 | 0.001028  | -0.000855 | 0.000895  | 0.001536  | 0.000085  | 0.000136  | -0.000160 | -0.000054 | 0.000119  | 0.000180  | 0.000207  | 0.001821  |
| 105 | 0.000454  | -0.002364 | 0.001738  | -0.000090 | -0.000500 | 0.000146  | -0.000274 | -0.000203 | 0.000102  | 0.000180  | 0.000162  | 0.002078  |
| 106 | 0.000170  | -0.001615 | 0.001201  | -0.000027 | -0.000387 | 0.000094  | -0.000276 | -0.000192 | 0.000100  | 0.000141  | 0.000114  | 0.001760  |
| 107 | 0.000072  | -0.001768 | 0.000800  | 0.000493  | -0.000404 | 0.000066  | -0.000190 | -0.000279 | 0.000054  | 0.000098  | 0.000126  | 0.002569  |
| 108 | 0.000302  | -0.002365 | 0.001558  | 0.000463  | -0.000474 | 0.000127  | -0.000285 | -0.000290 | 0.000115  | 0.000202  | 0.000147  | 0.003270  |
| 109 | 0.000342  | 0.001988  | -0.000197 | -0.001673 | 0.000114  | -0.000083 | 0.000097  | -0.000160 | -0.000088 | 0.000034  | -0.000132 | 0.002545  |
| 110 | -0.000004 | 0.000391  | 0.000034  | -0.000104 | -0.000281 | -0.000046 | 0.000366  | 0.000064  | 0.000058  | -0.000106 | 0.000009  | 0.002481  |
| 111 | -0.000469 | 0.001001  | -0.000574 | -0.000711 | -0.000055 | -0.000138 | -0.000093 | -0.000063 | -0.000057 | 0.000039  | -0.000147 | 0.002497  |
| 112 | -0.000020 | 0.000286  | -0.000596 | -0.000063 | -0.000357 | 0.000008  | 0.000228  | -0.000214 | -0.000016 | -0.000131 | 0.000015  | 0.003051  |
| 113 | -0.000015 | 0.000821  | -0.000387 | -0.000284 | -0.000849 | 0.000018  | 0.000037  | 0.000010  | -0.000013 | -0.000083 | -0.000175 | 0.000330  |
| 114 | -0.000549 | 0.000376  | -0.000350 | 0.000029  | 0.000088  | -0.000082 | 0.000048  | -0.000241 | -0.000006 | -0.000004 | 0.000103  | 0.000394  |
| 115 | -0.000423 | -0.000479 | -0.000753 | 0.000444  | 0.000121  | -0.000019 | 0.000264  | -0.000670 | -0.000067 | -0.000062 | -0.000119 | 0.003203  |
| 116 | -0.000858 | 0.000333  | -0.000854 | -0.000305 | -0.000305 | -0.000123 | -0.000054 | -0.000329 | -0.000037 | -0.000155 | 0.000034  | 0.002460  |
| 117 | 0.070292  | 0.222176  | 0.056243  | -0.273114 | -0.034510 | 0.001569  | 0.004553  | 0.041601  | 0.002811  | -0.002119 | -0.002843 | 0.022757  |
| 118 | 0.865386  | 1.446370  | -0.740405 | -1.186410 | 0.093791  | -0.039094 | -0.032236 | 0.040590  | -0.001288 | 0.003085  | 0.002491  | 0.003198  |
| 119 | 0.995735  | 1.376730  | -0.747449 | -1.131660 | 0.089574  | -0.035725 | -0.026267 | 0.034026  | 0.002166  | 0.002663  | 0.002153  | 0.003323  |
| 120 | -0.270766 | -0.128318 | -0.233521 | 0.891020  | 0.056173  | -0.089312 | 0.043988  | 0.032948  | 0.006975  | 0.004486  | 0.004849  | -0.001209 |
| 121 | 0.176797  | -0.079995 | 0.145151  | -0.442893 | -0.025660 | 0.034452  | -0.011075 | -0.017792 | -0.002008 | -0.004808 | -0.004766 | 0.001092  |
| 122 | 0.093936  | 0.208246  | 0.088358  | -0.448023 | -0.030502 | 0.054860  | -0.032914 | -0.015170 | -0.004967 | 0.000325  | -0.000084 | 0.000127  |
| 123 | -0.215694 | -0.168912 | -0.259938 | 0.097542  | 0.026379  | 0.026019  | -0.205719 | 0.055667  | 0.004326  | -0.003376 | -0.003497 | 0.002195  |
| 124 | 0.082119  | 0.187060  | 0.053308  | -0.049616 | -0.011648 | -0.014738 | 0.088030  | -0.025136 | 0.026633  | -0.012446 | -0.010944 | -0.000699 |
| 125 | 0.133609  | -0.018072 | 0.206640  | -0.048058 | -0.014748 | -0.011279 | 0.117683  | -0.030507 | -0.030960 | 0.015812  | 0.014453  | -0.001514 |
| 126 | -0.771523 | 1.453420  | 0.866738  | -0.453084 | 0.015817  | -0.009726 | -0.081611 | 0.114211  | 0.005241  | -0.009492 | -0.009720 | 0.003305  |
| 127 | -0.778265 | 1.526090  | 0.614956  | -0.232392 | 0.022251  | -0.013352 | -0.050906 | 0.112997  | -0.005433 | -0.007761 | -0.008185 | 0.003715  |
| 128 | 0.001280  | 0.033753  | -0.006137 | -0.018782 | 0.001858  | 0.000250  | 0.176566  | 0.009309  | 0.057074  | -0.049586 | -0.049209 | 0.000163  |
| 129 | 0.014836  | -0.027704 | -0.012676 | 0.027702  | -0.000196 | 0.003392  | 0.202689  | -0.000392 | -0.055633 | 0.027116  | -0.051384 | -0.000474 |
| 130 | 0.016256  | -0.027530 | -0.015309 | 0.029126  | -0.000278 | 0.003153  | 0.204670  | -0.000285 | -0.056026 | -0.051991 | 0.024878  | 0.000286  |
| 131 | -0.011486 | 0.009203  | 0.016190  | -0.016029 | -0.000454 | -0.002949 | -0.194571 | -0.003532 | 0.067385  | 0.072885  | -0.075813 | -0.000005 |
| 132 | -0.011884 | 0.007781  | 0.016620  | -0.015065 | -0.000481 | -0.002726 | -0.195553 | -0.003197 | 0.066666  | -0.075749 | 0.073309  | 0.000017  |
| 133 | -0.009811 | 0.005719  | 0.002289  | -0.008376 | -0.000447 | -0.001310 | -0.204693 | -0.001965 | -0.074539 | 0.077107  | 0.077501  | 0.000015  |
| 134 | -0.002197 | -0.002590 | -0.003363 | 0.010259  | 0.001998  | -0.000856 | 0.000402  | 0.004851  | -0.000313 | -0.000106 | 0.000219  | -0.002977 |
| 135 | 0.000874  | 0.002703  | 0.001735  | -0.002424 | 0.000246  | -0.000312 | -0.000024 | 0.003527  | 0.000030  | 0.000027  | 0.000071  | -0.000788 |
| 136 | -0.000609 | -0.003597 | 0.001545  | 0.001771  | 0.000155  | -0.000054 | -0.000166 | 0.000001  | 0.000073  | 0.000182  | 0.000068  | 0.001233  |
| 137 | 0.000123  | -0.002240 | 0.000706  | 0.000095  | 0.000202  | -0.000013 | -0.000032 | -0.000850 | 0.000019  | 0.000086  | -0.000018 | 0.001486  |
| 138 | 0.003784  | 0.010590  | 0.000603  | -0.009696 | 0.000482  | -0.000292 | 0.000221  | 0.001671  | -0.000143 | -0.000055 | 0.000004  | -0.000300 |
| 139 | -0.002337 | -0.001306 | -0.002998 | 0.009153  | -0.000562 | -0.000257 | 0.000276  | 0.000116  | -0.000320 | -0.000053 | -0.000157 | -0.002514 |
| 140 | -0.000022 | 0.001390  | -0.001703 | 0.002505  | -0.000337 | 0.000020  | 0.000168  | 0.000394  | -0.000026 | 0.000001  | 0.000014  | 0.000323  |
| 141 | -0.000815 | -0.004097 | -0.001014 | 0.006610  | -0.001135 | 0.000277  | -0.000029 | -0.000676 | 0.000035  | 0.000024  | 0.000151  | 0.001998  |
| 142 | -0.001791 | -0.005434 | -0.000890 | 0.008961  | -0.001165 | 0.000153  | -0.000200 | -0.000980 | -0.000008 | 0.000067  | 0.000316  | 0.002173  |
| 143 | -0.001362 | -0.003018 | -0.000855 | 0.005756  | -0.000460 | -0.000029 | -0.000114 | -0.000342 | -0.000094 | -0.000010 | 0.000127  | 0.000547  |
| 144 | 0.004585  | 0.008190  | 0.003406  | -0.015303 | 0.001526  | 0.000017  | 0.000712  | 0.002657  | -0.000050 | -0.000480 | -0.000798 | -0.003271 |
| 145 | 0.000973  | 0.000554  | 0.001713  | -0.003479 | 0.002423  | 0.000037  | 0.000045  | 0.000721  | -0.000074 | -0.000161 | -0.000196 | -0.000146 |
| 146 | 0.000700  | -0.000161 | 0.000825  | -0.001457 | -0.000163 | 0.000090  | 0.000087  | 0.000165  | -0.000022 | -0.000048 | -0.000055 | 0.000880  |
| 147 | 0.000626  | -0.000858 | 0.000590  | -0.001494 | -0.000209 | 0.000165  | 0.000236  | -0.000284 | -0.000029 | 0.000097  | -0.000058 | -0.000317 |
| 148 | 0.000525  | 0.000487  | 0.001033  | -0.003477 | 0.000923  | 0.000103  | 0.000211  | 0.000065  | -0.000013 | -0.000011 | -0.000226 | -0.002558 |
| 149 | -0.000332 | 0.000983  | -0.002522 | 0.005149  | -0.001119 | -0.000084 | 0.000243  | -0.000446 | 0.000012  | -0.000572 | -0.000181 | -0.004217 |
| 150 | -0.000344 | -0.000559 | -0.001638 | 0.003004  | -0.000636 | 0.000107  | 0.000148  | -0.000464 | -0.000016 | -0.000173 | -0.000082 | -0.002539 |

|     |           |           |           |           |           |           |           |           |           |           |           |           |
|-----|-----------|-----------|-----------|-----------|-----------|-----------|-----------|-----------|-----------|-----------|-----------|-----------|
| 151 | -0.000759 | -0.004006 | -0.001497 | 0.006768  | -0.000993 | 0.000258  | -0.000014 | -0.001270 | -0.000007 | 0.000020  | 0.000125  | 0.001360  |
| 152 | -0.000641 | -0.004254 | -0.000861 | 0.006649  | -0.001408 | 0.000291  | -0.000177 | -0.000761 | -0.000002 | -0.000027 | 0.000118  | 0.002952  |
| 153 | -0.000350 | -0.001062 | -0.000847 | 0.003394  | -0.000787 | 0.000039  | -0.000113 | 0.000634  | -0.000082 | -0.000174 | 0.000118  | 0.000032  |
| 154 | 0.001008  | 0.000326  | -0.000130 | -0.002484 | -0.000228 | 0.000045  | 0.000575  | -0.000708 | 0.000016  | -0.000045 | 0.000118  | 0.001165  |
| 155 | 0.000968  | -0.003166 | 0.001044  | 0.002416  | -0.000324 | 0.000321  | 0.000359  | -0.000217 | -0.000103 | -0.000055 | 0.000014  | 0.001846  |
| 156 | 0.000484  | -0.002943 | 0.000395  | 0.000348  | -0.000763 | 0.000383  | 0.000473  | -0.000241 | -0.000020 | -0.000173 | -0.000203 | 0.000602  |
| 157 | 0.000889  | -0.001189 | 0.001085  | 0.004008  | -0.000420 | 0.000102  | 0.000451  | 0.000804  | 0.000040  | -0.000028 | 0.000118  | 0.001035  |
| 158 | -0.007318 | -0.007706 | 0.002889  | 0.012140  | 0.000169  | 0.000220  | 0.000387  | -0.001250 | -0.000085 | -0.000119 | 0.000311  | -0.000667 |
| 159 | 0.008991  | 0.018832  | 0.003059  | -0.028016 | -0.002975 | -0.000075 | 0.000266  | 0.003864  | -0.000194 | -0.000785 | 0.000226  | -0.002850 |
| 160 | 0.005088  | 0.010635  | 0.002045  | -0.017940 | -0.002441 | 0.000155  | -0.000304 | 0.003063  | -0.000099 | -0.001389 | 0.001544  | -0.002354 |
| 161 | -0.006617 | 0.002060  | 0.002585  | 0.002044  | 0.001091  | 0.000004  | -0.000857 | -0.000102 | -0.000106 | 0.005548  | -0.005576 | -0.000962 |
| 162 | -0.000268 | 0.000976  | -0.000415 | 0.000576  | 0.000022  | -0.000026 | 0.000053  | -0.000222 | 0.000010  | -0.000044 | -0.000024 | -0.001621 |
| 163 | 0.005424  | 0.030998  | 0.000773  | -0.039475 | 0.007070  | -0.000582 | -0.000594 | 0.006706  | -0.001096 | 0.000618  | -0.001588 | 0.000293  |
| 164 | -0.001063 | -0.005726 | 0.001403  | 0.004026  | 0.000287  | -0.000036 | -0.000105 | 0.000117  | -0.000022 | 0.000132  | 0.000214  | 0.001800  |
| 165 | -0.000122 | -0.000936 | 0.000024  | 0.000811  | -0.000043 | 0.000008  | 0.000071  | 0.000114  | 0.000031  | 0.000033  | -0.000037 | -0.000631 |
| 166 | -0.000898 | 0.001581  | -0.000458 | -0.000019 | -0.000374 | -0.000009 | -0.000236 | 0.000859  | 0.000097  | -0.000093 | -0.000062 | -0.001086 |
| 167 | -0.001485 | -0.006881 | -0.002592 | 0.011233  | -0.001900 | 0.000371  | -0.000099 | -0.001269 | -0.000038 | 0.000142  | 0.000101  | 0.001907  |
| 168 | -0.000249 | 0.000394  | -0.000178 | 0.000177  | 0.000012  | -0.000050 | -0.000037 | 0.000022  | 0.000004  | 0.000001  | 0.000035  | 0.000701  |
| 169 | 0.003038  | 0.009649  | 0.002098  | -0.014188 | 0.002008  | -0.000216 | 0.000458  | 0.001907  | 0.000085  | -0.000181 | -0.000318 | -0.003156 |
| 170 | -0.001306 | 0.005688  | -0.002585 | -0.000467 | 0.001654  | -0.000326 | 0.000231  | 0.001090  | -0.000082 | -0.000219 | -0.000171 | -0.006297 |
| 171 | -0.000691 | -0.000352 | -0.000801 | 0.001902  | 0.000269  | -0.000019 | 0.000009  | -0.000204 | -0.000019 | 0.000072  | 0.000094  | -0.000010 |
| 172 | -0.001413 | 0.000538  | -0.001623 | 0.003767  | 0.000315  | -0.000191 | -0.000223 | 0.000239  | -0.000040 | -0.000109 | 0.000151  | -0.001337 |
| 173 | -0.001604 | -0.006546 | -0.002624 | 0.011010  | -0.002012 | 0.000328  | -0.000185 | -0.002188 | 0.000050  | -0.000011 | 0.000225  | 0.003427  |
| 174 | -0.000090 | -0.000185 | -0.000050 | 0.000069  | -0.000120 | 0.000017  | -0.000005 | -0.000041 | -0.000003 | -0.000041 | -0.000039 | -0.000706 |
| 175 | 0.001604  | 0.007052  | 0.001860  | -0.011081 | 0.002397  | -0.000334 | 0.000429  | 0.001365  | -0.000005 | 0.000102  | -0.000275 | -0.004437 |
| 176 | 0.001018  | 0.002521  | -0.002947 | 0.002826  | -0.000370 | 0.000131  | 0.000054  | 0.003885  | 0.000021  | -0.000138 | -0.000135 | 0.001962  |
| 177 | -0.001499 | -0.003518 | 0.000478  | 0.004404  | -0.000115 | -0.000261 | -0.000268 | 0.000083  | -0.000025 | 0.000112  | 0.000528  | -0.001473 |
| 178 | -0.003118 | -0.002861 | -0.000210 | 0.005304  | -0.000294 | -0.000410 | -0.000685 | -0.001002 | -0.000022 | 0.000156  | 0.000346  | 0.001629  |
| 179 | 0.002715  | 0.005063  | -0.000378 | -0.005281 | -0.000395 | 0.000054  | 0.000837  | 0.000979  | -0.000088 | -0.000025 | -0.000311 | -0.001433 |
| 180 | -0.000257 | -0.000817 | -0.001009 | 0.001476  | 0.001997  | -0.000029 | -0.000028 | -0.001053 | -0.000023 | 0.000289  | 0.000053  | -0.000419 |
| 181 | 0.000264  | -0.000901 | 0.001300  | -0.001075 | -0.001085 | 0.000281  | -0.000078 | 0.001222  | -0.000033 | -0.000259 | -0.000094 | 0.002742  |
| 182 | -0.000495 | -0.000501 | 0.001315  | -0.002395 | -0.000571 | 0.000084  | -0.000514 | -0.000101 | 0.000011  | -0.000065 | -0.000171 | -0.001481 |
| 183 | 0.001608  | 0.001862  | 0.001548  | -0.005856 | 0.000728  | 0.000168  | 0.000681  | -0.003438 | 0.000161  | -0.000106 | -0.000230 | -0.002075 |
| 184 | 0.007221  | 0.024770  | 0.002326  | -0.027262 | -0.001977 | 0.000032  | 0.000811  | 0.003964  | -0.000562 | 0.000467  | -0.000518 | -0.005130 |
| 185 | 0.013810  | 0.023624  | 0.003671  | -0.034477 | -0.004112 | 0.000300  | 0.001243  | 0.005170  | -0.000228 | -0.000782 | -0.000076 | -0.002943 |
| 186 | -0.001243 | -0.008045 | -0.000599 | 0.006433  | -0.000338 | -0.000153 | 0.001879  | -0.001080 | -0.000233 | -0.007821 | 0.008122  | 0.000589  |
| 187 | -0.012202 | -0.024219 | -0.000927 | 0.035093  | 0.004192  | 0.000143  | -0.003152 | -0.004962 | 0.000792  | 0.011147  | -0.010980 | 0.002371  |
| 188 | -0.004389 | 0.001571  | -0.000881 | 0.008155  | 0.002534  | -0.000387 | -0.000814 | -0.002304 | 0.000326  | -0.002816 | 0.003052  | 0.005272  |
| 189 | 0.000284  | -0.000605 | 0.000608  | -0.001217 | 0.000039  | -0.000096 | -0.001646 | 0.000129  | -0.001962 | 0.023612  | -0.022139 | 0.000146  |
| 190 | -0.000151 | -0.001394 | 0.000588  | -0.000466 | 0.000021  | 0.000041  | 0.000108  | -0.000924 | 0.000000  | -0.000006 | -0.000073 | 0.000148  |
| 191 | -0.000547 | -0.000400 | 0.001003  | -0.000692 | 0.000031  | 0.000046  | -0.000796 | -0.000165 | -0.000014 | 0.000145  | 0.000179  | 0.000142  |
| 192 | 0.000084  | 0.000710  | -0.000526 | -0.000029 | -0.000015 | -0.000029 | -0.000184 | 0.000103  | -0.000063 | 0.000127  | -0.000043 | -0.000047 |
| 193 | 0.000019  | -0.000082 | -0.000008 | 0.000093  | 0.000022  | 0.000011  | -0.000002 | 0.000048  | -0.000010 | 0.000014  | -0.000038 | 0.000033  |
| 194 | 0.000033  | 0.000391  | 0.000793  | -0.000733 | 0.000057  | 0.000063  | -0.000458 | 0.000357  | 0.000049  | 0.000076  | 0.000117  | 0.000063  |
| 195 | 0.000350  | 0.000653  | -0.000055 | -0.000790 | -0.000001 | -0.000020 | -0.000058 | -0.000294 | -0.000015 | 0.000085  | 0.000020  | -0.000096 |
| 196 | -0.000008 | -0.000540 | -0.000015 | 0.000011  | -0.000014 | 0.000000  | -0.000025 | -0.000155 | 0.000098  | -0.000011 | -0.000019 | 0.000005  |
| 197 | -0.000020 | 0.000198  | 0.000548  | -0.000563 | 0.000032  | 0.000034  | -0.000394 | 0.000106  | 0.000045  | 0.000054  | 0.000128  | -0.000009 |
| 198 | 0.000056  | 0.000277  | 0.000094  | -0.000286 | 0.000017  | 0.000015  | -0.000218 | 0.000070  | -0.000003 | 0.000077  | 0.000027  | -0.000019 |
| 199 | 0.000058  | 0.000203  | 0.000113  | -0.000216 | 0.000020  | 0.000005  | -0.000119 | 0.000049  | 0.000000  | 0.000063  | 0.000033  | -0.000016 |
| 200 | -0.000055 | -0.000122 | -0.000337 | 0.000370  | -0.000007 | -0.000018 | 0.000146  | -0.000139 | -0.000038 | 0.000006  | -0.000058 | 0.000021  |

|     |           |           |           |           |           |           |           |           |           |           |           |            |
|-----|-----------|-----------|-----------|-----------|-----------|-----------|-----------|-----------|-----------|-----------|-----------|------------|
| 201 | -0.000250 | -0.000138 | 0.000200  | -0.000220 | -0.000162 | -0.000002 | -0.000212 | 0.000040  | 0.000002  | 0.000029  | 0.000008  | 0.000074   |
| 202 | 0.000094  | 0.000067  | 0.000438  | -0.000333 | 0.000096  | 0.000057  | -0.000332 | 0.000039  | 0.000002  | 0.000068  | 0.000125  | 0.000045   |
| 203 | -0.000320 | -0.000139 | 0.000115  | 0.000174  | 0.000024  | -0.000027 | -0.000132 | -0.000037 | 0.000017  | 0.000019  | 0.000021  | 0.000081   |
| 204 | -0.000553 | 0.000171  | -0.000123 | -0.000111 | -0.000182 | -0.000065 | -0.000291 | 0.000009  | 0.000042  | 0.000053  | 0.000019  | -0.000050  |
| 205 | 0.000591  | 0.000834  | 0.000371  | -0.001061 | -0.000002 | 0.000087  | -0.000259 | 0.000170  | 0.000022  | 0.000059  | 0.000120  | 0.000076   |
| 206 | 0.000293  | -0.000246 | 0.000536  | -0.000036 | 0.000137  | 0.000047  | -0.000001 | -0.000007 | -0.000012 | -0.000049 | 0.000023  | 0.000012   |
| 207 | -0.000277 | -0.000072 | -0.000194 | 0.000153  | -0.000072 | -0.000044 | -0.000047 | -0.000038 | 0.000012  | -0.000022 | -0.000048 | 0.000046   |
| 208 | -0.000044 | 0.000093  | 0.000143  | -0.000240 | -0.000014 | 0.000012  | -0.000193 | 0.000023  | 0.000019  | 0.000048  | 0.000037  | 0.000023   |
| 209 | -0.000063 | 0.000114  | 0.000141  | -0.000231 | -0.000018 | 0.000001  | -0.000219 | 0.000022  | 0.000015  | 0.000057  | 0.000049  | 0.000007   |
| 210 | 0.000265  | 0.000222  | 0.000285  | -0.000420 | 0.000085  | 0.000059  | -0.000176 | 0.000061  | -0.000004 | 0.000048  | 0.000079  | -0.000007  |
| 211 | -0.000158 | 0.000218  | 0.000126  | 0.000049  | 0.000291  | -0.000022 | 0.000052  | 0.000040  | 0.000015  | -0.000037 | -0.000011 | -0.000005  |
| 212 | -0.000112 | 0.000230  | 0.000132  | -0.000025 | -0.000065 | 0.000017  | -0.000103 | 0.000113  | 0.000026  | -0.000005 | 0.000008  | -0.0000573 |
| 213 | 0.000094  | 0.000097  | 0.000363  | -0.000321 | 0.000154  | 0.000028  | -0.000230 | 0.000003  | -0.000012 | 0.000127  | 0.000110  | 0.000165   |
| 214 | -0.000010 | 0.000069  | 0.000119  | 0.000047  | 0.000236  | -0.000018 | -0.000061 | -0.000035 | -0.000010 | 0.000048  | 0.000049  | 0.000496   |
| 215 | -0.000053 | 0.000648  | -0.000098 | -0.000037 | 0.000337  | -0.000028 | -0.000205 | 0.000070  | 0.000023  | -0.000013 | 0.000013  | -0.000067  |
| 216 | 0.000582  | 0.000615  | 0.000321  | -0.000783 | 0.000343  | 0.000082  | -0.000234 | 0.000164  | 0.000001  | 0.000051  | 0.000057  | 0.000057   |
| 217 | 0.000153  | -0.000459 | 0.000338  | -0.000321 | -0.000681 | 0.000043  | 0.000073  | -0.000048 | -0.000022 | 0.000011  | -0.000003 | 0.000359   |
| 218 | -0.000125 | 0.000090  | -0.000082 | 0.000153  | 0.000020  | -0.000029 | 0.000011  | -0.000007 | 0.000005  | -0.000017 | -0.000012 | -0.001129  |
| 219 | -0.000002 | 0.000176  | 0.000152  | -0.000205 | 0.000036  | 0.000014  | -0.000167 | 0.000027  | 0.000001  | 0.000024  | 0.000046  | 0.000011   |
| 220 | 0.000034  | 0.000203  | 0.000157  | -0.000185 | 0.000084  | -0.000002 | -0.000200 | 0.000039  | 0.000000  | 0.000048  | 0.000058  | 0.000132   |
| 221 | 0.000305  | 0.000173  | 0.000168  | -0.000402 | 0.000101  | 0.000036  | -0.000137 | 0.000034  | -0.000014 | 0.000043  | 0.000050  | 0.000038   |
| 222 | 0.000092  | -0.000083 | 0.000082  | -0.000158 | 0.000283  | 0.000013  | 0.000116  | 0.000001  | -0.000019 | -0.000035 | -0.000038 | 0.000091   |
| 223 | 0.000039  | -0.000365 | 0.000912  | -0.000244 | 0.000028  | 0.000010  | 0.000063  | 0.000019  | 0.000063  | 0.000091  | -0.000058 | -0.000011  |
| 224 | 0.000149  | 0.000271  | 0.000700  | -0.000957 | 0.000083  | 0.000063  | -0.000528 | 0.000071  | 0.000125  | 0.000235  | 0.000063  | 0.000116   |
| 225 | -0.000427 | -0.000374 | -0.000516 | -0.000114 | -0.000023 | -0.000041 | -0.000413 | -0.000194 | 0.000000  | -0.000035 | 0.000111  | -0.000049  |
| 226 | -0.000115 | -0.000171 | 0.000108  | -0.000090 | -0.000037 | -0.000011 | -0.000066 | 0.000111  | 0.000011  | 0.000012  | 0.000017  | 0.000027   |
| 227 | 0.000148  | 0.000433  | 0.000607  | -0.000998 | 0.000039  | 0.000034  | -0.000375 | 0.000173  | 0.000050  | 0.000163  | 0.000052  | -0.000039  |
| 228 | -0.000272 | -0.000432 | 0.000098  | -0.000298 | 0.000018  | -0.000028 | -0.000231 | -0.000245 | 0.000000  | 0.000006  | 0.000082  | 0.000142   |
| 229 | -0.000077 | -0.000399 | 0.000384  | 0.000407  | -0.000021 | -0.000011 | 0.000065  | 0.000281  | 0.000073  | 0.000105  | -0.000046 | -0.000025  |
| 230 | 0.000125  | 0.000313  | 0.000484  | -0.000578 | 0.000048  | 0.000060  | -0.000278 | 0.000097  | 0.000043  | 0.000129  | 0.000035  | -0.000004  |
| 231 | -0.000049 | 0.000089  | 0.000052  | -0.000386 | 0.000016  | 0.000000  | -0.000282 | -0.000010 | 0.000004  | 0.000025  | 0.000076  | 0.000008   |
| 232 | -0.000014 | 0.000049  | 0.000081  | -0.000253 | 0.000001  | 0.000000  | -0.000167 | -0.000006 | 0.000004  | 0.000024  | 0.000062  | 0.000022   |
| 233 | -0.000223 | -0.000338 | -0.000325 | 0.000332  | -0.000045 | -0.000042 | 0.000048  | -0.000112 | -0.000041 | -0.000058 | 0.000017  | 0.000019   |
| 234 | 0.000531  | 0.001874  | 0.001538  | -0.002104 | 0.000146  | 0.000123  | -0.000872 | 0.001074  | 0.000188  | 0.000024  | 0.000239  | -0.000055  |
| 235 | -0.000328 | -0.002785 | 0.002801  | -0.001278 | 0.000032  | 0.000075  | -0.000235 | -0.001184 | 0.000226  | -0.000030 | 0.000471  | 0.000097   |
| 236 | -0.000089 | -0.000578 | -0.001815 | 0.001247  | -0.000106 | -0.000115 | 0.000810  | -0.000874 | -0.000206 | 0.000005  | -0.000381 | -0.000025  |
| 237 | -0.000405 | 0.000973  | -0.001586 | 0.000831  | -0.000049 | -0.000060 | -0.000281 | 0.000072  | -0.000205 | 0.000169  | -0.000158 | 0.000016   |
| 238 | 0.000023  | -0.000373 | 0.000687  | -0.000096 | 0.000021  | 0.000038  | -0.000023 | 0.000215  | 0.000100  | -0.000104 | 0.000106  | 0.000024   |
| 239 | 0.000079  | -0.000353 | 0.000075  | 0.000317  | 0.000000  | -0.000002 | 0.000283  | 0.000134  | 0.000031  | -0.000087 | -0.000039 | 0.000028   |
| 240 | -0.000050 | 0.000263  | 0.000530  | -0.000563 | 0.000028  | 0.000036  | -0.000420 | 0.000164  | 0.000032  | 0.000067  | 0.000123  | -0.000004  |
| 241 | -0.000038 | 0.000111  | 0.000645  | -0.000541 | 0.000032  | 0.000037  | -0.000342 | 0.000168  | 0.000047  | 0.000038  | 0.000119  | 0.000009   |
| 242 | 0.000042  | 0.000229  | -0.000574 | 0.000364  | -0.000020 | -0.000040 | 0.000150  | -0.000051 | -0.000041 | 0.000027  | -0.000060 | -0.000047  |
| 243 | 0.000035  | 0.000311  | -0.000380 | 0.000147  | -0.000009 | -0.000027 | 0.000021  | -0.000014 | -0.000031 | 0.000041  | -0.000023 | -0.000031  |
| 244 | 0.000189  | 0.000227  | -0.000665 | 0.000572  | -0.000018 | -0.000009 | 0.000310  | 0.000225  | -0.000036 | -0.000051 | -0.000136 | -0.000005  |
| 245 | 0.000009  | 0.000095  | -0.001252 | 0.001099  | -0.000058 | -0.000056 | 0.000595  | 0.000065  | -0.000105 | -0.000100 | -0.000262 | -0.000008  |
| 246 | 0.003314  | 0.000724  | 0.001545  | -0.002279 | 0.000524  | 0.000522  | 0.000531  | 0.000481  | -0.000108 | -0.000061 | 0.000070  | -0.000083  |
| 247 | 0.000063  | 0.000043  | 0.000755  | -0.000299 | 0.000320  | 0.000084  | -0.000527 | -0.000029 | -0.000006 | 0.000145  | 0.000282  | 0.000237   |
| 248 | -0.001051 | -0.000649 | -0.000693 | 0.001243  | -0.000186 | -0.000181 | 0.000174  | -0.000221 | 0.000000  | -0.000069 | -0.000137 | -0.000066  |
| 249 | -0.000734 | -0.000541 | -0.000253 | 0.000806  | -0.000037 | -0.000095 | 0.000021  | -0.000135 | 0.000008  | -0.000036 | -0.000056 | -0.000013  |
| 250 | -0.000249 | 0.000108  | -0.000164 | -0.000034 | -0.000091 | -0.000042 | -0.000080 | 0.000012  | 0.000010  | 0.000016  | -0.000017 | 0.000034   |

|     |           |           |           |           |           |           |           |           |           |           |           |           |
|-----|-----------|-----------|-----------|-----------|-----------|-----------|-----------|-----------|-----------|-----------|-----------|-----------|
| 251 | -0.000286 | 0.000074  | -0.000280 | 0.000057  | -0.000139 | -0.000057 | -0.000027 | -0.000003 | 0.000024  | 0.000006  | -0.000045 | -0.000001 |
| 252 | 0.000414  | 0.000226  | 0.000281  | -0.000436 | 0.000076  | 0.000069  | -0.000089 | 0.000069  | 0.000002  | 0.000049  | 0.000078  | -0.000003 |
| 253 | 0.000307  | 0.000303  | 0.000210  | -0.000484 | 0.000026  | 0.000046  | -0.000172 | 0.000066  | 0.000005  | 0.000057  | 0.000081  | -0.000009 |
| 254 | 0.000045  | -0.000293 | 0.000124  | 0.000304  | 0.000161  | 0.000037  | 0.000161  | -0.000048 | -0.000024 | -0.000038 | -0.000024 | 0.000013  |
| 255 | 0.000575  | -0.000032 | 0.000305  | -0.000072 | 0.000268  | 0.000116  | 0.000211  | 0.000032  | -0.000038 | -0.000044 | 0.000033  | 0.000016  |
| 256 | -0.001371 | 0.000503  | -0.001070 | 0.000255  | -0.000573 | -0.000260 | -0.000376 | -0.000095 | 0.000091  | 0.000061  | -0.000049 | -0.000044 |
| 257 | -0.001025 | -0.000465 | -0.000760 | 0.000941  | -0.000349 | -0.000239 | 0.000174  | -0.000128 | 0.000035  | -0.000087 | -0.000214 | -0.000085 |
| 258 | 0.000959  | -0.001903 | 0.001484  | -0.001898 | -0.001994 | 0.000382  | 0.000092  | 0.000455  | -0.000080 | -0.000074 | -0.000049 | -0.000132 |
| 259 | 0.000353  | 0.000803  | 0.000120  | -0.000593 | 0.000657  | -0.000001 | -0.000324 | -0.000164 | -0.000038 | 0.000268  | 0.000202  | -0.001615 |
| 260 | -0.000601 | -0.000172 | -0.000539 | 0.001106  | 0.000274  | -0.000131 | 0.000254  | -0.000194 | 0.000012  | -0.000066 | -0.000072 | 0.000202  |
| 261 | -0.000259 | -0.000246 | -0.000123 | 0.000635  | 0.000265  | -0.000066 | 0.000085  | -0.000131 | 0.000011  | 0.000009  | -0.000009 | 0.001575  |
| 262 | -0.000078 | 0.000414  | -0.000158 | -0.000009 | 0.000089  | -0.000021 | -0.000057 | 0.000043  | 0.000022  | -0.000019 | 0.000000  | -0.000558 |
| 263 | -0.000132 | 0.000322  | -0.000203 | 0.000112  | 0.000058  | -0.000033 | -0.000011 | 0.000028  | 0.000022  | -0.000042 | -0.000017 | -0.000450 |
| 264 | 0.000173  | -0.000045 | 0.000277  | -0.000309 | -0.000021 | 0.000044  | -0.000123 | 0.000055  | -0.000009 | 0.000069  | 0.000058  | 0.000149  |
| 265 | 0.000159  | 0.000132  | 0.000201  | -0.000347 | 0.000049  | 0.000026  | -0.000199 | 0.000052  | -0.000009 | 0.000056  | 0.000051  | -0.000009 |
| 266 | -0.000018 | -0.000407 | 0.000043  | 0.000061  | -0.000054 | 0.000014  | 0.000126  | -0.000070 | -0.000028 | -0.000019 | -0.000023 | 0.000195  |
| 267 | 0.000338  | -0.000438 | 0.000146  | -0.000237 | -0.000009 | 0.000066  | 0.000162  | -0.000032 | -0.000044 | 0.000011  | -0.000011 | 0.000103  |
| 268 | -0.000125 | 0.001677  | -0.000801 | 0.000479  | 0.001044  | -0.000148 | -0.000176 | 0.000019  | 0.000096  | -0.000031 | 0.000000  | 0.000149  |
| 269 | -0.000765 | -0.000136 | -0.000447 | 0.000999  | -0.000352 | -0.000131 | 0.000172  | -0.000061 | 0.000045  | -0.000160 | -0.000129 | 0.000392  |
| 270 | 0.000260  | 0.000994  | 0.001484  | -0.002226 | 0.000056  | 0.000114  | -0.000578 | 0.000557  | 0.000113  | 0.000363  | 0.000017  | 0.000116  |
| 271 | 0.002010  | 0.001556  | 0.002546  | -0.000405 | 0.000366  | 0.000256  | 0.000547  | 0.000143  | 0.000184  | 0.000352  | -0.000084 | 0.000101  |
| 272 | -0.000850 | -0.001340 | -0.001530 | 0.001459  | -0.000163 | -0.000194 | 0.000201  | -0.000509 | -0.000125 | -0.000377 | 0.000016  | -0.000023 |
| 273 | -0.001243 | -0.001067 | -0.001776 | 0.000289  | -0.000133 | -0.000133 | -0.000665 | -0.000469 | -0.000086 | -0.000179 | 0.000156  | -0.000004 |
| 274 | 0.000458  | 0.000434  | 0.000766  | -0.000046 | 0.000071  | 0.000090  | 0.000299  | 0.000296  | 0.000055  | 0.000131  | -0.000108 | -0.000023 |
| 275 | 0.000214  | 0.000078  | 0.000237  | 0.000311  | -0.000002 | 0.000019  | 0.000357  | 0.000188  | 0.000006  | -0.000009 | -0.000077 | -0.000034 |
| 276 | 0.000260  | 0.000530  | 0.000292  | -0.000724 | 0.000041  | 0.000046  | -0.000304 | 0.000070  | 0.000042  | 0.000112  | 0.000045  | -0.000009 |
| 277 | 0.000313  | 0.000519  | 0.000451  | -0.000627 | 0.000038  | 0.000047  | -0.000196 | 0.000118  | 0.000047  | 0.000118  | 0.000036  | -0.000008 |
| 278 | -0.000290 | -0.000356 | -0.000536 | 0.000405  | -0.000033 | -0.000040 | -0.000014 | -0.000177 | -0.000040 | -0.000105 | 0.000044  | 0.000034  |
| 279 | -0.000268 | -0.000269 | -0.000387 | 0.000218  | -0.000004 | -0.000039 | -0.000099 | -0.000142 | -0.000035 | -0.000069 | 0.000049  | 0.000065  |
| 280 | -0.000262 | -0.000344 | -0.000495 | 0.000426  | -0.000087 | -0.000053 | 0.000146  | 0.000041  | -0.000058 | -0.000107 | -0.000032 | -0.000110 |
| 281 | -0.000601 | -0.000732 | -0.001048 | 0.000916  | -0.000149 | -0.000112 | 0.000305  | -0.000115 | -0.000102 | -0.000230 | -0.000062 | -0.000107 |
| 282 | 0.000172  | 0.000493  | -0.000044 | 0.000172  | -0.000095 | 0.000042  | 0.000095  | 0.000541  | 0.000045  | -0.000062 | -0.000005 | 0.000059  |
| 283 | -0.000067 | -0.000124 | 0.000143  | -0.000109 | -0.000018 | 0.000017  | -0.000046 | -0.000026 | -0.000010 | -0.000023 | 0.000030  | 0.000011  |
| 284 | -0.000082 | -0.000074 | 0.000146  | -0.000023 | 0.000013  | -0.000002 | -0.000103 | 0.000001  | 0.000003  | 0.000030  | 0.000005  | 0.000012  |
| 285 | -0.000184 | -0.000311 | 0.000198  | -0.000135 | -0.000001 | -0.000002 | -0.000147 | -0.000145 | -0.000003 | 0.000017  | 0.000012  | -0.000002 |
| 286 | -0.000129 | -0.000255 | 0.000167  | -0.000334 | -0.000001 | -0.000007 | -0.000157 | -0.000230 | -0.000008 | 0.000014  | 0.000005  | -0.000052 |
| 287 | -0.000401 | -0.001028 | 0.000621  | -0.000599 | 0.000013  | 0.000000  | -0.000310 | -0.000561 | -0.000011 | 0.000012  | 0.000043  | -0.000081 |
| 288 | 0.000366  | 0.000570  | 0.000111  | -0.000367 | 0.000129  | 0.000013  | -0.000005 | 0.000179  | -0.000014 | 0.000039  | -0.000056 | 0.000026  |
| 289 | 0.000529  | 0.000803  | 0.000290  | -0.000122 | 0.000131  | 0.000056  | 0.000027  | 0.000124  | 0.000010  | -0.000008 | 0.000065  | 0.000057  |
| 290 | -0.000085 | -0.000254 | -0.000128 | -0.000006 | -0.000028 | -0.000008 | 0.000016  | -0.000025 | -0.000004 | 0.000007  | -0.000024 | -0.000013 |
| 291 | -0.000088 | -0.000181 | -0.000117 | 0.000012  | -0.000023 | -0.000009 | 0.000032  | -0.000029 | -0.000004 | 0.000005  | -0.000030 | -0.000031 |
| 292 | -0.000030 | -0.000075 | -0.000065 | 0.000105  | -0.000030 | -0.000004 | 0.000058  | -0.000026 | 0.000000  | -0.000002 | -0.000007 | -0.000062 |
| 293 | 0.000115  | 0.000126  | 0.000021  | -0.000035 | -0.000020 | 0.000020  | 0.000026  | 0.000007  | 0.000006  | -0.000007 | 0.000029  | -0.000105 |
| 294 | -0.000034 | 0.000273  | -0.000154 | -0.000114 | -0.000234 | -0.000026 | -0.000070 | -0.000052 | -0.000007 | 0.000004  | -0.000065 | -0.000051 |
| 295 | -0.000325 | -0.000040 | -0.000177 | 0.000165  | -0.000493 | -0.000057 | -0.000043 | -0.000040 | 0.000015  | -0.000020 | -0.000010 | 0.000091  |
| 296 | 0.000093  | 0.000020  | 0.000042  | 0.000024  | 0.000201  | 0.000013  | 0.000020  | 0.000005  | -0.000001 | 0.000019  | 0.000005  | 0.000018  |
| 297 | 0.000077  | 0.000018  | 0.000061  | -0.000009 | 0.000139  | 0.000011  | 0.000008  | 0.000016  | -0.000002 | 0.000018  | -0.000004 | -0.000036 |
| 298 | 0.000024  | 0.000040  | 0.000051  | -0.000049 | 0.000001  | 0.000007  | -0.000014 | 0.000019  | -0.000004 | 0.000013  | 0.000004  | 0.000013  |
| 299 | -0.000085 | -0.000121 | 0.000019  | 0.000196  | -0.000091 | -0.000003 | 0.000020  | -0.000005 | 0.000005  | 0.000009  | 0.000006  | -0.000012 |
| 300 | 0.000035  | -0.000027 | 0.000179  | 0.000229  | -0.000147 | -0.000024 | -0.000026 | -0.000020 | 0.000074  | 0.000017  | 0.000045  | -0.000019 |



|     |           |           |           |           |           |           |           |           |           |           |           |           |
|-----|-----------|-----------|-----------|-----------|-----------|-----------|-----------|-----------|-----------|-----------|-----------|-----------|
| 301 | -0.000088 | -0.000278 | -0.000161 | 0.000216  | -0.000027 | -0.000012 | -0.000003 | -0.000087 | -0.000028 | -0.000038 | 0.000030  | 0.000103  |
| 302 | 0.000059  | 0.000082  | -0.000104 | 0.000021  | 0.000011  | -0.000002 | 0.000098  | 0.000015  | -0.000019 | -0.000031 | -0.000017 | -0.000064 |
| 303 | 0.000063  | -0.000006 | -0.000287 | 0.000133  | 0.000017  | 0.000002  | 0.000101  | -0.000034 | -0.000054 | -0.000065 | 0.000014  | -0.000014 |
| 304 | 0.000139  | 0.000081  | -0.000378 | 0.000067  | 0.000035  | 0.000006  | 0.000119  | -0.000048 | -0.000078 | -0.000082 | 0.000020  | 0.000000  |
| 305 | 0.000054  | -0.000116 | -0.000956 | 0.000186  | 0.000066  | -0.000006 | 0.000057  | -0.000146 | -0.000183 | -0.000172 | 0.000076  | -0.000028 |
| 306 | -0.000915 | -0.001587 | 0.001516  | -0.002495 | -0.000023 | 0.000049  | -0.000735 | -0.001648 | -0.000160 | 0.000007  | 0.000101  | -0.000045 |
| 307 | -0.000356 | -0.000975 | 0.000490  | -0.000534 | -0.000059 | 0.000013  | -0.000132 | -0.000507 | -0.000017 | -0.000064 | 0.000028  | 0.000005  |
| 308 | 0.000115  | 0.000566  | -0.000122 | 0.000299  | 0.000006  | 0.000019  | -0.000055 | 0.000450  | 0.000019  | 0.000034  | 0.000006  | 0.000046  |
| 309 | 0.000170  | 0.000327  | -0.000194 | 0.000135  | -0.000001 | -0.000013 | 0.000145  | 0.000142  | 0.000011  | -0.000004 | -0.000027 | -0.000012 |
| 310 | -0.000030 | -0.000134 | -0.000046 | 0.000030  | -0.000006 | -0.000003 | 0.000043  | -0.000105 | -0.000008 | -0.000012 | -0.000004 | 0.000015  |
| 311 | -0.000099 | -0.000181 | 0.000146  | -0.000033 | 0.000020  | 0.000005  | -0.000083 | -0.000048 | -0.000005 | 0.000014  | 0.000013  | 0.000027  |
| 312 | 0.000201  | 0.000402  | -0.000276 | 0.000111  | 0.000040  | -0.000021 | 0.000084  | 0.000075  | 0.000001  | 0.000032  | -0.000016 | -0.000079 |
| 313 | 0.001481  | 0.001933  | 0.000428  | -0.000262 | 0.000202  | 0.000131  | 0.000169  | 0.000262  | 0.000052  | -0.000019 | 0.000168  | -0.000138 |
| 314 | -0.000070 | -0.000020 | -0.000048 | -0.000216 | 0.000057  | -0.000020 | -0.000027 | 0.000038  | -0.000015 | 0.000023  | -0.000071 | 0.000015  |
| 315 | 0.000137  | 0.000143  | 0.000035  | -0.000083 | 0.000037  | 0.000019  | -0.000001 | 0.000036  | -0.000003 | 0.000011  | 0.000011  | 0.000016  |
| 316 | 0.000003  | 0.000002  | -0.000010 | 0.000069  | -0.000030 | -0.000001 | 0.000023  | 0.000001  | 0.000008  | -0.000003 | 0.000006  | 0.000003  |
| 317 | -0.000153 | -0.000256 | -0.000082 | 0.000053  | -0.000009 | -0.000027 | -0.000008 | -0.000040 | -0.000011 | -0.000006 | -0.000040 | -0.000001 |
| 318 | -0.000245 | -0.000277 | -0.000069 | -0.000131 | -0.000022 | -0.000010 | -0.000085 | -0.000032 | -0.000002 | 0.000020  | -0.000006 | 0.000038  |
| 319 | 0.000319  | 0.000407  | 0.000173  | 0.000311  | -0.000032 | 0.000039  | 0.000095  | -0.000003 | 0.000023  | -0.000045 | 0.000101  | -0.000068 |
| 320 | -0.000416 | 0.000118  | -0.000454 | 0.000036  | -0.001774 | -0.000116 | 0.000045  | -0.000052 | 0.000046  | -0.000015 | -0.000008 | -0.001047 |
| 321 | 0.000074  | 0.000031  | 0.000068  | -0.000047 | 0.000169  | 0.000014  | -0.000005 | 0.000005  | -0.000004 | 0.000006  | -0.000040 | -0.000041 |
| 322 | -0.000024 | 0.000026  | -0.000062 | 0.000063  | -0.000035 | -0.000006 | 0.000003  | -0.000024 | 0.000004  | 0.000006  | -0.000005 | 0.000042  |
| 323 | 0.000006  | 0.000070  | -0.000012 | -0.000087 | -0.000059 | -0.000010 | -0.000020 | 0.000010  | -0.000003 | 0.000001  | 0.000003  | -0.000014 |
| 324 | 0.000092  | 0.000028  | 0.000039  | -0.000081 | 0.000125  | 0.000019  | 0.000004  | 0.000009  | -0.000007 | -0.000001 | 0.000002  | -0.000058 |
| 325 | 0.000108  | -0.000148 | 0.000098  | 0.000102  | 0.000353  | 0.000028  | 0.000064  | 0.000006  | 0.000006  | 0.000004  | -0.000003 | 0.000056  |
| 326 | -0.000255 | -0.000011 | -0.000130 | 0.000052  | -0.000548 | -0.000044 | -0.000044 | -0.000006 | 0.000004  | -0.000016 | 0.000042  | 0.000013  |
| 327 | -0.000129 | -0.000849 | -0.001994 | 0.001277  | 0.000140  | -0.000053 | 0.000214  | -0.000204 | -0.000404 | -0.000352 | 0.000208  | 0.000240  |
| 328 | 0.000097  | -0.000013 | -0.000885 | 0.000136  | -0.000011 | -0.000011 | -0.000101 | -0.000143 | -0.000124 | -0.000144 | 0.000115  | 0.000054  |
| 329 | 0.000008  | -0.000048 | 0.000423  | 0.000152  | -0.000038 | -0.000003 | 0.000189  | 0.000047  | 0.000058  | 0.000039  | -0.000046 | -0.000051 |
| 330 | -0.000015 | 0.000094  | 0.000248  | -0.000127 | -0.000016 | 0.000001  | -0.000077 | 0.000055  | 0.000058  | 0.000061  | -0.000024 | 0.000004  |
| 331 | -0.000017 | 0.000023  | 0.000002  | -0.000076 | 0.000012  | 0.000004  | -0.000054 | 0.000005  | 0.000003  | 0.000003  | 0.000002  | -0.000001 |
| 332 | 0.000031  | 0.000045  | -0.000117 | -0.000006 | 0.000011  | -0.000002 | 0.000029  | 0.000006  | -0.000023 | -0.000015 | 0.000005  | -0.000036 |
| 333 | -0.000104 | -0.000101 | 0.000332  | -0.000076 | 0.000042  | 0.000010  | 0.000015  | 0.000030  | 0.000030  | 0.000056  | -0.000054 | 0.000029  |

|    | 61        | 62        | 63        | 64        | 65        | 66        | 67        | 68        | 69        | 70        | 71        | 72        |
|----|-----------|-----------|-----------|-----------|-----------|-----------|-----------|-----------|-----------|-----------|-----------|-----------|
| 1  | 0.042323  | 0.030182  | 0.111809  | 0.119089  | -0.088400 | -0.094754 | -0.065807 | -0.054634 | -0.012740 | -0.006892 | -0.001806 | -0.006201 |
| 2  | 0.003209  | 0.013138  | -0.073291 | -0.074402 | 0.039891  | 0.039968  | 0.030402  | 0.021627  | 0.007357  | -0.001730 | 0.010629  | -0.004245 |
| 3  | 0.053494  | -0.019139 | -0.071858 | -0.000677 | 0.046360  | 0.019323  | -0.027592 | 0.000309  | 0.005963  | -0.012248 | -0.002496 | 0.012247  |
| 4  | -0.009549 | 0.057593  | 0.002623  | -0.064353 | 0.011277  | 0.038015  | -0.005037 | -0.030755 | 0.005885  | 0.017681  | -0.005706 | -0.016647 |
| 5  | -0.042323 | -0.020253 | 0.031706  | 0.043482  | -0.013311 | -0.040132 | 0.023581  | 0.016379  | 0.001361  | 0.001055  | -0.007911 | 0.004307  |
| 6  | -0.030929 | -0.045888 | 0.032884  | 0.030617  | -0.026591 | -0.014950 | 0.024070  | 0.030011  | 0.001771  | 0.007057  | -0.005035 | -0.002628 |
| 7  | -0.126159 | -0.108885 | -0.123477 | -0.114560 | 0.048639  | 0.104359  | 0.121280  | 0.088785  | 0.013312  | 0.008180  | 0.009312  | 0.005020  |
| 8  | -0.041981 | 0.023751  | 0.019152  | -0.014721 | -0.018469 | 0.005069  | 0.044942  | -0.015634 | -0.076511 | -0.003265 | -0.025636 | 0.106866  |
| 9  | -0.012141 | -0.011020 | 0.013357  | -0.011348 | -0.001623 | 0.013582  | -0.003592 | 0.007687  | 0.114061  | -0.021687 | -0.004589 | -0.086317 |
| 10 | 0.004184  | -0.012763 | -0.007920 | 0.031399  | 0.006751  | -0.023945 | -0.004518 | 0.001422  | 0.118066  | -0.087196 | -0.011212 | -0.021501 |
| 11 | 0.014722  | -0.020794 | 0.003935  | 0.012349  | -0.008263 | -0.009343 | -0.011901 | 0.021434  | -0.083573 | 0.114401  | -0.025285 | -0.006264 |
| 12 | -0.023383 | 0.021960  | 0.008892  | -0.023149 | -0.006509 | 0.026690  | 0.017419  | -0.024484 | -0.024699 | 0.111515  | -0.082157 | -0.003443 |
| 13 | 0.013631  | 0.004741  | -0.006712 | -0.005223 | -0.010929 | 0.003020  | 0.007842  | -0.001770 | -0.003528 | -0.083436 | 0.102959  | -0.016175 |
| 14 | 0.004999  | 0.003702  | -0.016310 | -0.011632 | 0.018261  | 0.003440  | -0.005979 | 0.008283  | -0.001026 | -0.019710 | 0.111357  | -0.088428 |

|    |           |           |           |           |           |           |           |           |           |           |           |           |
|----|-----------|-----------|-----------|-----------|-----------|-----------|-----------|-----------|-----------|-----------|-----------|-----------|
| 15 | 0.020322  | -0.001475 | 0.010060  | -0.007263 | -0.008566 | 0.010533  | -0.020369 | -0.005417 | -0.026562 | -0.007020 | -0.085136 | 0.116502  |
| 16 | 0.013202  | -0.003421 | -0.004845 | 0.002330  | -0.003489 | -0.001789 | 0.001805  | 0.001487  | -0.092710 | -0.060111 | 0.025348  | 0.127253  |
| 17 | -0.037970 | 0.012461  | 0.019549  | -0.035260 | 0.002336  | 0.021181  | 0.015924  | -0.011462 | 0.164590  | -0.156151 | -0.163285 | 0.157341  |
| 18 | 0.022215  | -0.008262 | -0.009562 | 0.007338  | -0.000662 | -0.002183 | -0.018629 | 0.001885  | 0.125055  | 0.024608  | -0.058728 | -0.092702 |
| 19 | 0.007962  | 0.009117  | 0.006912  | -0.006114 | -0.005313 | 0.000157  | -0.010981 | -0.009356 | 0.126030  | -0.094113 | -0.060985 | 0.026722  |
| 20 | 0.004801  | -0.028431 | -0.016665 | 0.000804  | 0.004936  | 0.004403  | -0.007446 | 0.023114  | 0.166068  | 0.161170  | -0.165281 | -0.159617 |
| 21 | -0.013457 | 0.017797  | -0.003534 | -0.006111 | 0.006944  | 0.002831  | 0.008632  | -0.008306 | -0.093524 | 0.127788  | 0.027337  | -0.060642 |
| 22 | 0.008180  | -0.019311 | -0.003124 | 0.000333  | 0.000923  | 0.005928  | -0.012825 | 0.014652  | 0.024742  | 0.130595  | -0.092487 | -0.062034 |
| 23 | -0.041305 | 0.044517  | -0.008272 | 0.009074  | 0.001765  | -0.003065 | 0.048190  | -0.037526 | -0.164662 | 0.160566  | 0.168183  | -0.163136 |
| 24 | 0.017071  | -0.005580 | -0.003707 | 0.021336  | 0.004192  | -0.020040 | -0.011117 | 0.005562  | -0.057548 | -0.092748 | 0.121456  | 0.026867  |
| 25 | -0.011664 | 0.013490  | 0.004126  | 0.002668  | 0.000741  | -0.003963 | 0.008102  | -0.006008 | -0.056778 | 0.027544  | 0.127032  | -0.097869 |
| 26 | 0.016020  | -0.019591 | -0.004177 | -0.003669 | 0.006262  | 0.008132  | -0.003945 | 0.015232  | -0.161491 | -0.161288 | 0.162761  | 0.162274  |
| 27 | -0.006483 | 0.002406  | 0.015515  | -0.013477 | -0.012908 | 0.005117  | 0.005579  | -0.000507 | 0.023887  | -0.062367 | -0.095288 | 0.133483  |
| 28 | 0.021159  | -0.019070 | -0.013187 | -0.022580 | 0.009994  | 0.011773  | -0.043216 | 0.004607  | 0.898454  | -0.322708 | -0.311442 | -0.265847 |
| 29 | 0.017905  | -0.005137 | -0.032032 | 0.008755  | 0.016381  | -0.013734 | -0.030237 | -0.013332 | 0.906520  | -0.269957 | -0.319257 | -0.320991 |
| 30 | -0.012494 | -0.015567 | -0.016348 | -0.020133 | 0.007969  | 0.027432  | -0.007326 | 0.031708  | -0.263783 | 0.909449  | -0.327688 | -0.312321 |
| 31 | -0.042780 | 0.009728  | -0.026812 | -0.005020 | 0.017153  | 0.013498  | 0.026991  | 0.007313  | -0.321234 | 0.906137  | -0.268792 | -0.309948 |
| 32 | 0.015971  | 0.003156  | 0.023342  | 0.035926  | -0.014751 | -0.024683 | 0.000423  | 0.010896  | -0.306375 | -0.267945 | 0.893988  | -0.322229 |
| 33 | 0.012840  | -0.003186 | 0.009548  | 0.041816  | 0.004384  | -0.031602 | 0.000586  | 0.016091  | -0.304835 | -0.323517 | 0.894407  | -0.267203 |
| 34 | 0.015604  | -0.045549 | 0.004326  | -0.031042 | -0.002787 | 0.022793  | 0.010798  | 0.030095  | -0.322555 | -0.313508 | -0.270268 | 0.911610  |
| 35 | -0.014820 | -0.024741 | -0.018580 | -0.028849 | 0.025571  | 0.016718  | 0.033052  | 0.011113  | -0.263001 | -0.307608 | -0.325597 | 0.903846  |
| 36 | -0.000539 | 0.002116  | 0.001783  | 0.000161  | -0.001672 | -0.000047 | 0.000120  | -0.001717 | -0.001943 | 0.008928  | 0.003924  | -0.011207 |
| 37 | -0.001218 | 0.001264  | 0.000164  | 0.000635  | 0.001139  | -0.000359 | 0.000240  | -0.001040 | -0.010841 | 0.003491  | 0.008917  | -0.001567 |
| 38 | 0.000517  | -0.001094 | -0.001029 | 0.000831  | 0.001553  | 0.000095  | -0.000450 | 0.000488  | -0.011659 | -0.001787 | 0.009539  | 0.004059  |
| 39 | 0.001124  | -0.000485 | -0.000093 | 0.000817  | 0.000325  | -0.000497 | -0.000790 | -0.000225 | -0.001809 | -0.011216 | 0.003609  | 0.009311  |
| 40 | 0.001263  | -0.000197 | 0.000691  | -0.000284 | -0.001408 | 0.000391  | -0.000205 | -0.000421 | 0.003368  | -0.011187 | -0.001448 | 0.009112  |
| 41 | 0.001089  | -0.001334 | -0.000482 | -0.001018 | -0.001046 | 0.000907  | 0.000102  | 0.000932  | 0.009207  | -0.001509 | -0.011152 | 0.003534  |
| 42 | 0.000226  | 0.000341  | -0.001070 | 0.000112  | 0.000468  | -0.001041 | -0.000145 | 0.000299  | 0.008591  | 0.003227  | -0.010528 | -0.001327 |
| 43 | -0.000867 | 0.001774  | -0.000323 | 0.000716  | 0.000114  | -0.001086 | 0.000517  | -0.001088 | 0.003546  | 0.009163  | -0.001303 | -0.011541 |
| 44 | 0.006548  | -0.008414 | -0.008807 | 0.006085  | 0.009351  | -0.002373 | -0.008964 | 0.003098  | 0.058972  | -0.016841 | -0.025138 | -0.016894 |
| 45 | -0.003332 | 0.001502  | 0.001050  | -0.002427 | -0.001688 | 0.003966  | 0.002187  | -0.001434 | -0.016420 | 0.057677  | -0.017191 | -0.023775 |
| 46 | 0.006151  | -0.002812 | -0.004373 | 0.000257  | 0.002108  | -0.004401 | -0.002202 | 0.008636  | -0.023245 | -0.015899 | 0.056723  | -0.017204 |
| 47 | -0.001074 | -0.000836 | 0.001504  | -0.003405 | -0.001617 | 0.000655  | 0.002990  | 0.001813  | -0.016227 | -0.024751 | -0.018466 | 0.059777  |
| 48 | -0.049431 | 0.012277  | 0.004239  | -0.032192 | 0.052788  | 0.037464  | -0.007564 | -0.017431 | 0.005201  | 0.002488  | -0.000063 | -0.001705 |
| 49 | 0.010167  | -0.006847 | -0.003109 | 0.006808  | -0.031007 | -0.006583 | 0.024021  | 0.006446  | -0.002513 | -0.000713 | 0.000227  | 0.002368  |
| 50 | 0.064816  | -0.014856 | -0.023089 | 0.043440  | -0.039222 | -0.049953 | -0.002507 | 0.021387  | -0.006672 | -0.003240 | 0.000686  | 0.002846  |
| 51 | 0.004297  | -0.003628 | -0.000155 | -0.001715 | -0.005737 | 0.001498  | 0.001603  | 0.003787  | -0.000995 | 0.000562  | -0.001613 | 0.002150  |
| 52 | -0.080566 | 0.032319  | 0.032353  | -0.047777 | 0.029248  | 0.045374  | 0.018969  | -0.029948 | 0.005937  | 0.004544  | 0.000950  | -0.005641 |
| 53 | 0.013723  | -0.006180 | -0.004108 | 0.010339  | 0.020601  | -0.008778 | -0.030352 | 0.004770  | 0.000460  | 0.000557  | -0.002490 | 0.000205  |
| 54 | -0.001840 | -0.000269 | -0.000407 | -0.001316 | 0.001985  | 0.001875  | 0.000267  | -0.000283 | 0.000157  | 0.000138  | 0.000092  | -0.000038 |
| 55 | -0.000759 | 0.000342  | 0.002547  | 0.000623  | -0.007552 | -0.001292 | 0.005770  | 0.000272  | -0.000239 | -0.000179 | 0.000008  | 0.000159  |
| 56 | 0.013235  | -0.004632 | -0.002126 | 0.011291  | -0.016303 | -0.012083 | 0.005230  | 0.005462  | -0.004009 | 0.000676  | 0.000828  | 0.000903  |
| 57 | -0.001570 | 0.001048  | 0.001279  | -0.001353 | -0.002104 | 0.000669  | 0.002396  | -0.000386 | 0.000092  | 0.000042  | -0.000070 | -0.000010 |
| 58 | 0.000214  | -0.001366 | -0.001167 | 0.000340  | 0.001788  | 0.000030  | -0.000837 | 0.001006  | 0.000100  | -0.000029 | 0.000044  | 0.000065  |
| 59 | -0.002780 | 0.001329  | 0.001286  | -0.002156 | 0.000011  | 0.002216  | 0.001496  | -0.001397 | 0.000038  | 0.000124  | 0.000048  | 0.000001  |
| 60 | 0.020978  | 0.025805  | -0.035119 | -0.036575 | 0.054917  | 0.038551  | -0.010389 | -0.007173 | 0.002979  | -0.002265 | 0.007244  | -0.003822 |
| 61 | 0.646014  | -0.000829 | -0.266522 | 0.168390  | -0.026784 | -0.181891 | -0.293273 | 0.015624  | -0.010003 | -0.022312 | -0.022034 | 0.009949  |
| 62 | -0.000829 | 0.609000  | 0.134912  | -0.297391 | -0.143257 | 0.005676  | 0.010161  | -0.247220 | -0.013358 | 0.005917  | 0.002835  | -0.029487 |
| 63 | -0.266522 | 0.134912  | 0.585518  | 0.049892  | -0.268434 | -0.022404 | -0.049407 | -0.165217 | -0.015096 | -0.029031 | -0.006024 | 0.004079  |
| 64 | 0.168390  | -0.297391 | 0.049892  | 0.656403  | -0.035717 | -0.285971 | -0.184026 | -0.030945 | -0.039660 | 0.007918  | 0.008772  | -0.025847 |

|     |           |           |           |           |           |           |           |           |           |           |           |           |
|-----|-----------|-----------|-----------|-----------|-----------|-----------|-----------|-----------|-----------|-----------|-----------|-----------|
| 65  | -0.026784 | -0.143257 | -0.268434 | -0.035717 | 0.529726  | 0.024792  | -0.344796 | 0.158679  | 0.005054  | 0.017475  | 0.016620  | 0.004202  |
| 66  | -0.181891 | 0.005676  | -0.022404 | -0.285971 | 0.024792  | 0.648602  | 0.182502  | -0.279378 | 0.019052  | 0.000602  | 0.009163  | 0.015293  |
| 67  | -0.293273 | 0.010161  | -0.049407 | -0.184026 | -0.344796 | 0.182502  | 0.479382  | -0.011608 | -0.004888 | 0.009001  | 0.036703  | 0.006485  |
| 68  | 0.015624  | -0.247220 | -0.165217 | -0.030945 | 0.158679  | -0.279378 | -0.011608 | 0.538344  | 0.011064  | 0.008334  | 0.002480  | 0.017043  |
| 69  | -0.010003 | -0.013358 | -0.015096 | -0.039660 | 0.005054  | 0.019052  | -0.004888 | 0.011064  | 0.730857  | -0.159187 | -0.409037 | -0.159856 |
| 70  | -0.022312 | 0.005917  | -0.029031 | 0.007918  | 0.017475  | 0.000602  | 0.009001  | 0.008334  | -0.159187 | 0.728067  | -0.162915 | -0.402510 |
| 71  | -0.022034 | 0.002835  | -0.006024 | 0.008772  | 0.016620  | 0.009163  | 0.036703  | 0.002480  | -0.409037 | -0.162915 | 0.743285  | -0.165421 |
| 72  | 0.009949  | -0.029487 | 0.004079  | -0.025847 | 0.004202  | 0.015293  | 0.006485  | 0.017043  | -0.159856 | -0.402510 | -0.165421 | 0.731466  |
| 73  | 0.001389  | 0.022540  | 0.010385  | 0.012971  | -0.012255 | -0.005561 | 0.008247  | -0.009431 | -0.374559 | 0.196843  | 0.313165  | -0.137122 |
| 74  | -0.003246 | -0.008434 | -0.000013 | -0.014015 | 0.002323  | 0.007457  | 0.003259  | 0.006902  | 0.063038  | -0.114914 | -0.084646 | 0.138288  |
| 75  | -0.003260 | -0.004206 | 0.002206  | -0.016159 | -0.004363 | 0.007458  | 0.002760  | 0.004805  | 0.142394  | -0.080852 | -0.118828 | 0.058232  |
| 76  | -0.009681 | 0.000160  | -0.001512 | 0.051500  | -0.004849 | -0.025760 | 0.008685  | -0.005362 | -0.140712 | 0.305093  | 0.204496  | -0.371211 |
| 77  | 0.014984  | -0.019117 | 0.023237  | 0.031788  | -0.005533 | -0.026628 | -0.010433 | 0.007239  | -0.142795 | -0.370326 | 0.202462  | 0.370303  |
| 78  | 0.004243  | -0.006363 | -0.000769 | -0.006523 | -0.006661 | 0.003352  | -0.005687 | 0.007045  | 0.143340  | 0.058620  | -0.120745 | -0.081364 |
| 79  | -0.000909 | -0.005401 | -0.004076 | -0.003560 | -0.001384 | 0.002986  | -0.002494 | 0.008124  | 0.063648  | 0.138486  | -0.085329 | -0.116097 |
| 80  | -0.004339 | 0.029563  | 0.001913  | 0.028407  | 0.008873  | -0.021048 | 0.016095  | -0.029640 | -0.379998 | -0.134542 | 0.315836  | 0.196306  |
| 81  | 0.038858  | -0.065069 | 0.012141  | -0.051513 | -0.027734 | 0.049386  | -0.031055 | 0.046825  | 0.309762  | -0.131668 | -0.374661 | 0.199861  |
| 82  | -0.019917 | 0.016785  | -0.003936 | 0.010017  | 0.006988  | -0.005265 | 0.014475  | -0.013362 | -0.084967 | 0.140731  | 0.063677  | -0.119118 |
| 83  | -0.020612 | 0.026071  | 0.001429  | 0.016707  | 0.005714  | -0.012016 | 0.016126  | -0.022675 | -0.119131 | 0.059318  | 0.142949  | -0.084260 |
| 84  | 0.053126  | -0.013820 | 0.002464  | -0.029481 | -0.008411 | 0.009328  | -0.040027 | 0.013071  | 0.204192  | -0.369493 | -0.154907 | 0.317670  |
| 85  | 0.014663  | 0.029950  | -0.024830 | -0.002499 | 0.012742  | -0.009197 | -0.025189 | -0.010881 | 0.199517  | 0.315704  | -0.139068 | -0.378975 |
| 86  | 0.007114  | -0.010155 | 0.005302  | 0.003480  | -0.001752 | 0.005517  | -0.001949 | 0.003490  | -0.115793 | -0.083080 | 0.140730  | 0.058586  |
| 87  | 0.009239  | -0.014673 | 0.004621  | -0.002424 | -0.002198 | 0.006922  | -0.002890 | 0.007795  | -0.082289 | -0.117921 | 0.058835  | 0.142188  |
| 88  | -0.028122 | 0.030012  | 0.002908  | -0.011626 | -0.002196 | -0.005732 | 0.005375  | -0.019843 | 0.306848  | 0.196846  | -0.373288 | -0.132351 |
| 89  | 0.012520  | 0.010133  | 0.004665  | -0.001991 | -0.007597 | -0.002639 | -0.012614 | -0.008351 | 0.076576  | -0.008685 | -0.063825 | -0.006912 |
| 90  | 0.000087  | 0.001138  | 0.001171  | 0.001462  | -0.001106 | -0.001294 | -0.003320 | 0.001440  | -0.005809 | 0.077631  | -0.009905 | -0.062280 |
| 91  | 0.001852  | 0.005086  | 0.016137  | 0.017393  | -0.011153 | -0.012604 | -0.003912 | -0.007253 | -0.060740 | -0.008462 | 0.073450  | -0.007427 |
| 92  | 0.004522  | -0.005839 | 0.002284  | -0.002567 | -0.003182 | 0.001644  | -0.000575 | 0.003927  | -0.007980 | -0.061851 | -0.008255 | 0.078220  |
| 93  | 0.002151  | 0.004408  | 0.000594  | 0.007318  | -0.002072 | -0.003743 | -0.001764 | -0.003480 | -0.037904 | 0.062162  | 0.048974  | -0.074213 |
| 94  | 0.001093  | 0.003942  | -0.000601 | 0.006601  | -0.000225 | -0.003624 | -0.001499 | -0.003331 | -0.025125 | 0.052763  | 0.035674  | -0.064079 |
| 95  | 0.000778  | 0.001607  | -0.001842 | 0.006599  | 0.003124  | -0.003154 | -0.000689 | -0.001458 | -0.065765 | 0.034189  | 0.054409  | -0.023022 |
| 96  | 0.002358  | 0.001725  | -0.000455 | 0.008411  | 0.001369  | -0.003325 | -0.002001 | -0.002295 | -0.076491 | 0.046965  | 0.064370  | -0.035399 |
| 97  | -0.001278 | 0.003043  | 0.000878  | 0.004010  | 0.003486  | -0.002117 | 0.001844  | -0.003750 | -0.076680 | -0.035670 | 0.065110  | 0.047173  |
| 98  | -0.003354 | 0.003295  | -0.000460 | 0.002390  | 0.003503  | -0.001104 | 0.004261  | -0.003281 | -0.066640 | -0.023019 | 0.055655  | 0.034301  |
| 99  | 0.001058  | 0.002095  | 0.002908  | 0.001041  | -0.000370 | -0.000693 | 0.000342  | -0.003583 | -0.025600 | -0.064257 | 0.036029  | 0.053411  |
| 100 | 0.000671  | 0.003456  | 0.002093  | 0.002801  | 0.000886  | -0.002596 | 0.001271  | -0.004664 | -0.038176 | -0.074145 | 0.049276  | 0.062554  |
| 101 | 0.011576  | -0.009396 | 0.001906  | -0.005244 | -0.003975 | 0.002941  | -0.008358 | 0.007150  | 0.048818  | -0.075757 | -0.038067 | 0.064766  |
| 102 | 0.008277  | -0.006947 | 0.001871  | -0.004347 | -0.002946 | 0.001998  | -0.005963 | 0.005676  | 0.036098  | -0.064901 | -0.025573 | 0.054235  |
| 103 | 0.009115  | -0.012246 | -0.000276 | -0.007816 | -0.002664 | 0.005866  | -0.007564 | 0.010619  | 0.054725  | -0.023378 | -0.066104 | 0.035307  |
| 104 | 0.011594  | -0.013775 | -0.001123 | -0.008774 | -0.003106 | 0.006045  | -0.008635 | 0.011993  | 0.064422  | -0.035923 | -0.076883 | 0.048931  |
| 105 | -0.003523 | 0.005826  | -0.002945 | -0.001965 | 0.000798  | -0.003314 | 0.000786  | -0.001674 | 0.063266  | 0.048108  | -0.076029 | -0.035632 |
| 106 | -0.004051 | 0.004274  | -0.002794 | -0.001629 | 0.001347  | -0.002085 | 0.001666  | -0.001763 | 0.052550  | 0.035018  | -0.064657 | -0.022970 |
| 107 | -0.003993 | 0.006617  | -0.002371 | 0.002221  | 0.001310  | -0.003541 | 0.001150  | -0.004044 | 0.034697  | 0.054376  | -0.023353 | -0.066156 |
| 108 | -0.004478 | 0.008234  | -0.001437 | 0.000390  | 0.000162  | -0.003566 | 0.000886  | -0.003933 | 0.047525  | 0.063498  | -0.035572 | -0.076005 |
| 109 | -0.004168 | -0.006098 | -0.002829 | 0.001561  | 0.004659  | -0.000380 | 0.004842  | 0.005651  | -0.041401 | -0.015445 | 0.034253  | 0.023932  |
| 110 | -0.008203 | -0.003962 | -0.001833 | 0.000459  | 0.002820  | 0.002992  | 0.007733  | 0.002623  | -0.035143 | 0.024196  | 0.029450  | -0.017021 |
| 111 | 0.003815  | -0.002869 | 0.001186  | -0.000900 | -0.000924 | -0.000251 | -0.003464 | 0.001916  | 0.023079  | -0.037438 | -0.015199 | 0.029295  |
| 112 | -0.003827 | 0.002058  | -0.001969 | -0.000163 | 0.001768  | 0.001235  | 0.006559  | -0.003775 | -0.017115 | -0.039864 | 0.024682  | 0.032814  |
| 113 | -0.002307 | -0.001340 | -0.010328 | -0.006658 | 0.005607  | 0.004859  | 0.004801  | 0.002635  | 0.028837  | 0.023232  | -0.035451 | -0.014978 |
| 114 | 0.000402  | -0.003979 | -0.005825 | -0.010814 | 0.005622  | 0.007849  | -0.000897 | 0.004830  | 0.031857  | -0.014706 | -0.037948 | 0.022371  |

|     |           |           |           |           |           |           |           |           |           |           |           |           |
|-----|-----------|-----------|-----------|-----------|-----------|-----------|-----------|-----------|-----------|-----------|-----------|-----------|
| 115 | -0.002063 | 0.003442  | 0.001108  | -0.000295 | 0.000958  | 0.000260  | -0.000657 | -0.001155 | -0.016657 | 0.031746  | 0.023983  | -0.039113 |
| 116 | -0.002746 | 0.002453  | -0.003286 | 0.002739  | 0.002197  | -0.001751 | 0.001443  | -0.002866 | 0.024603  | 0.030092  | -0.015884 | -0.038883 |
| 117 | 0.068634  | -0.020439 | -0.048591 | 0.032604  | -0.146230 | -0.045203 | 0.126732  | 0.032281  | -0.011929 | -0.008556 | 0.007480  | 0.010152  |
| 118 | 0.066515  | -0.019983 | -0.026308 | 0.043629  | -0.050800 | -0.051063 | 0.010604  | 0.027322  | -0.006621 | -0.003877 | 0.000682  | 0.004023  |
| 119 | 0.062935  | -0.009994 | -0.013763 | 0.038779  | -0.056351 | -0.041584 | 0.007273  | 0.012688  | -0.007383 | -0.003894 | 0.000566  | 0.003632  |
| 120 | 0.006196  | 0.001694  | 0.000366  | 0.005325  | -0.024257 | -0.011281 | 0.017720  | 0.004140  | -0.001623 | -0.000789 | 0.000707  | 0.000476  |
| 121 | -0.002726 | -0.001315 | -0.000687 | -0.002759 | 0.013194  | 0.006502  | -0.009788 | -0.002360 | 0.000774  | 0.000399  | -0.000340 | -0.000155 |
| 122 | -0.003459 | -0.000387 | 0.000296  | -0.002559 | 0.011201  | 0.004736  | -0.008057 | -0.001736 | 0.000849  | 0.000394  | -0.000368 | -0.000323 |
| 123 | 0.005000  | 0.006499  | 0.000153  | 0.000672  | 0.006037  | 0.001746  | -0.011155 | -0.008841 | -0.000611 | -0.000036 | -0.000177 | -0.000296 |
| 124 | -0.004095 | -0.000952 | 0.000673  | -0.002090 | -0.000183 | 0.001291  | 0.003611  | 0.001738  | 0.000138  | 0.000106  | 0.000344  | 0.000001  |
| 125 | -0.000898 | -0.005564 | -0.000828 | 0.001444  | -0.006050 | -0.002989 | 0.007736  | 0.007044  | 0.000473  | -0.000076 | -0.000165 | 0.000297  |
| 126 | 0.067872  | -0.013089 | -0.017303 | 0.042400  | -0.047071 | -0.046952 | -0.003480 | 0.017586  | -0.006978 | -0.003501 | -0.000580 | 0.003800  |
| 127 | 0.044473  | -0.001120 | -0.006497 | 0.024694  | -0.035971 | -0.030112 | -0.001979 | 0.006531  | -0.005277 | -0.001839 | 0.000218  | 0.001307  |
| 128 | 0.000793  | 0.000230  | 0.000124  | 0.000337  | -0.002562 | -0.000712 | 0.001647  | 0.000128  | -0.000016 | -0.000173 | 0.000000  | 0.000054  |
| 129 | 0.002798  | -0.004006 | -0.003279 | 0.002915  | 0.004621  | -0.003980 | -0.004173 | 0.005111  | 0.000108  | -0.000042 | 0.000053  | 0.000024  |
| 130 | -0.003345 | 0.002312  | 0.002199  | -0.002826 | -0.001953 | 0.004151  | 0.003123  | -0.003663 | -0.000009 | 0.000169  | -0.000103 | 0.000094  |
| 131 | -0.001908 | 0.002174  | 0.002254  | -0.001889 | -0.002179 | 0.000983  | 0.001840  | -0.001290 | 0.000007  | 0.000022  | -0.000079 | -0.000008 |
| 132 | 0.000352  | -0.000206 | -0.000671 | 0.000462  | 0.001640  | 0.000692  | -0.001320 | -0.000930 | -0.000003 | 0.000076  | 0.000075  | -0.000142 |
| 133 | 0.001287  | -0.000441 | -0.000580 | 0.000971  | 0.000371  | -0.001108 | -0.001081 | 0.000588  | -0.000088 | -0.000051 | 0.000055  | -0.000027 |
| 134 | 0.033776  | -0.029270 | 0.027273  | -0.026281 | -0.018482 | 0.027602  | -0.043886 | 0.027846  | 0.021990  | 0.006476  | -0.013061 | -0.016086 |
| 135 | 0.035354  | 0.011950  | 0.001002  | 0.032078  | -0.010996 | -0.029755 | -0.025668 | -0.014199 | 0.000641  | 0.000531  | -0.004078 | -0.004433 |
| 136 | -0.001126 | -0.035528 | -0.008800 | -0.040975 | 0.011386  | 0.038357  | -0.001663 | 0.038350  | 0.004024  | 0.004828  | 0.001017  | -0.002026 |
| 137 | -0.004418 | -0.031405 | -0.003284 | -0.041159 | 0.004693  | 0.035115  | 0.002508  | 0.037820  | 0.003552  | 0.011667  | -0.000587 | -0.007355 |
| 138 | 0.027375  | 0.024889  | 0.015694  | 0.025721  | -0.035491 | -0.031886 | -0.008124 | -0.019040 | 0.004363  | 0.002096  | -0.011198 | -0.003856 |
| 139 | -0.028732 | 0.024864  | -0.028565 | 0.025872  | 0.028971  | -0.015476 | 0.029512  | -0.036693 | 0.007510  | -0.031743 | -0.002230 | 0.027067  |
| 140 | 0.019008  | 0.025779  | 0.029512  | 0.006893  | -0.033379 | -0.013966 | -0.015555 | -0.019157 | 0.004163  | 0.001356  | -0.013595 | 0.000599  |
| 141 | -0.045927 | -0.003046 | -0.041397 | -0.014438 | 0.038637  | 0.015395  | 0.049300  | 0.001642  | 0.001952  | -0.008297 | 0.002770  | 0.013162  |
| 142 | -0.043047 | -0.007923 | -0.048537 | -0.014827 | 0.045574  | 0.015954  | 0.046193  | 0.006497  | 0.007111  | -0.003518 | 0.000658  | 0.006178  |
| 143 | 0.024463  | 0.002849  | 0.009668  | 0.004171  | -0.012157 | -0.007851 | -0.021871 | 0.000383  | 0.004759  | -0.010248 | -0.004038 | 0.005732  |
| 144 | 0.036328  | -0.064949 | 0.024319  | -0.050900 | -0.033105 | 0.039582  | -0.026576 | 0.074382  | 0.017144  | -0.040542 | -0.006183 | 0.034450  |
| 145 | 0.026202  | 0.014038  | 0.007153  | 0.033270  | 0.001147  | -0.038267 | -0.034052 | -0.008689 | -0.010524 | -0.006408 | 0.008700  | 0.000958  |
| 146 | 0.001497  | -0.011946 | 0.004322  | -0.011557 | -0.001758 | 0.008888  | -0.004054 | 0.014591  | 0.000319  | -0.000193 | -0.000213 | 0.001684  |
| 147 | -0.015190 | -0.007772 | -0.004615 | -0.018154 | 0.008701  | 0.016212  | 0.011468  | 0.009772  | -0.002693 | -0.002473 | 0.006136  | 0.003230  |
| 148 | 0.004029  | -0.007110 | 0.009941  | -0.006011 | 0.005787  | 0.005275  | -0.019566 | 0.008875  | -0.015087 | 0.010196  | 0.013027  | -0.008117 |
| 149 | -0.027883 | 0.016399  | -0.029058 | 0.030096  | 0.024750  | -0.030349 | 0.031007  | -0.015605 | 0.013023  | 0.014299  | 0.001053  | -0.027425 |
| 150 | 0.016087  | 0.001693  | 0.024330  | 0.007504  | -0.024047 | 0.000437  | -0.016075 | -0.009749 | -0.004244 | -0.004965 | 0.001094  | 0.003597  |
| 151 | -0.045477 | -0.005447 | -0.043131 | -0.011245 | 0.038829  | 0.011615  | 0.049756  | 0.005210  | 0.002735  | 0.004888  | 0.003872  | -0.001861 |
| 152 | -0.041900 | -0.009832 | -0.044412 | -0.010258 | 0.039671  | 0.010176  | 0.046711  | 0.010001  | 0.003172  | 0.001812  | 0.005280  | -0.000528 |
| 153 | 0.027138  | 0.005726  | 0.019558  | 0.018987  | -0.022115 | -0.013501 | -0.024389 | -0.010974 | -0.004522 | -0.004419 | 0.007109  | -0.004642 |
| 154 | 0.007260  | 0.003476  | 0.000121  | 0.001523  | -0.005823 | -0.001305 | -0.001764 | -0.003755 | 0.000749  | 0.003426  | -0.005338 | 0.000011  |
| 155 | -0.002142 | -0.009299 | -0.011052 | -0.011379 | 0.007453  | 0.008824  | 0.006357  | 0.011989  | -0.004536 | -0.007856 | 0.011874  | 0.003666  |
| 156 | -0.003335 | -0.014471 | -0.001125 | -0.005065 | 0.004854  | 0.006557  | -0.000445 | 0.013230  | -0.002325 | 0.004026  | 0.002478  | -0.001981 |
| 157 | 0.009649  | -0.001952 | -0.003499 | 0.004040  | 0.000840  | -0.005063 | -0.007057 | 0.003218  | 0.000971  | -0.000599 | 0.005038  | -0.006147 |
| 158 | -0.014507 | 0.010280  | 0.010803  | -0.011673 | 0.000555  | 0.006085  | 0.003228  | -0.004750 | -0.000188 | -0.000116 | 0.000140  | 0.000629  |
| 159 | -0.003223 | 0.002264  | 0.006799  | -0.001898 | -0.038865 | 0.011899  | 0.035403  | -0.012575 | 0.000180  | -0.001283 | 0.000273  | 0.000468  |
| 160 | 0.000922  | -0.002275 | -0.000282 | 0.003501  | -0.026197 | 0.006433  | 0.025622  | -0.007861 | 0.000044  | -0.000790 | 0.000164  | 0.000412  |
| 161 | 0.004003  | -0.002605 | -0.001438 | 0.004096  | 0.011940  | -0.015763 | -0.014597 | 0.014395  | -0.000393 | 0.000076  | 0.000287  | -0.000338 |
| 162 | -0.024709 | 0.026004  | 0.019883  | -0.021477 | -0.025636 | 0.024471  | 0.030689  | -0.029222 | -0.000859 | 0.000390  | 0.000866  | -0.000363 |
| 163 | 0.065449  | -0.048052 | -0.045398 | 0.055493  | 0.042909  | -0.063244 | -0.063454 | 0.056442  | -0.003981 | 0.003400  | -0.002400 | 0.000483  |
| 164 | -0.011052 | -0.058249 | -0.021641 | -0.060162 | 0.031307  | 0.056897  | 0.000782  | 0.061756  | 0.013183  | 0.007803  | -0.000643 | -0.006653 |

|     |           |           |           |           |           |           |           |           |           |           |           |           |
|-----|-----------|-----------|-----------|-----------|-----------|-----------|-----------|-----------|-----------|-----------|-----------|-----------|
| 165 | 0.001898  | -0.002014 | -0.000924 | 0.001607  | 0.001567  | -0.000831 | -0.002883 | 0.001517  | 0.001915  | 0.005610  | 0.000754  | -0.008335 |
| 166 | 0.015806  | 0.050845  | 0.011091  | 0.062714  | -0.015964 | -0.053114 | -0.010382 | -0.060799 | -0.004799 | -0.014382 | 0.002041  | 0.004396  |
| 167 | -0.073243 | -0.012733 | -0.061006 | -0.028167 | 0.056072  | 0.034319  | 0.078851  | 0.006021  | 0.004383  | -0.006944 | 0.002678  | 0.015882  |
| 168 | -0.000049 | 0.002273  | 0.000564  | 0.000660  | -0.001153 | -0.001083 | -0.000045 | -0.001799 | 0.006831  | 0.008637  | -0.007390 | -0.008445 |
| 169 | 0.068675  | 0.023636  | 0.074888  | 0.028207  | -0.070464 | -0.035641 | -0.073644 | -0.015798 | -0.008443 | 0.007740  | -0.005554 | -0.011585 |
| 170 | 0.027256  | 0.080070  | 0.042628  | 0.100869  | -0.034872 | -0.085083 | -0.036571 | -0.097069 | 0.018503  | 0.004527  | -0.041613 | -0.004471 |
| 171 | -0.007891 | 0.035988  | -0.000928 | 0.033962  | 0.003749  | -0.030894 | 0.005151  | -0.039147 | -0.001307 | -0.002526 | -0.000543 | -0.001162 |
| 172 | 0.020687  | 0.043157  | 0.017889  | 0.060144  | -0.016623 | -0.052396 | -0.022468 | -0.050807 | -0.000760 | 0.004848  | -0.007252 | -0.009770 |
| 173 | -0.071074 | -0.013482 | -0.067397 | -0.031622 | 0.059445  | 0.026240  | 0.078897  | 0.019125  | 0.005424  | 0.009449  | 0.006245  | -0.004339 |
| 174 | -0.001265 | -0.001190 | 0.000302  | -0.002001 | 0.000281  | 0.002251  | 0.000657  | 0.000844  | 0.001208  | -0.000322 | -0.001840 | 0.001320  |
| 175 | 0.064475  | 0.015627  | 0.069530  | 0.027260  | -0.061147 | -0.020799 | -0.073038 | -0.022492 | -0.002836 | -0.003886 | -0.014094 | 0.004606  |
| 176 | -0.012267 | 0.025662  | -0.004504 | 0.008975  | -0.009882 | -0.016140 | 0.026895  | -0.018118 | -0.012977 | 0.007510  | 0.005383  | -0.001453 |
| 177 | -0.009381 | -0.015728 | -0.029267 | 0.012847  | 0.029017  | 0.005697  | 0.010097  | -0.002447 | -0.006461 | -0.001537 | 0.010095  | 0.001768  |
| 178 | 0.024429  | 0.000184  | 0.009814  | -0.005014 | -0.001857 | -0.006995 | -0.031918 | 0.012224  | -0.007504 | -0.006325 | 0.011581  | -0.000374 |
| 179 | 0.017609  | 0.014519  | 0.030095  | 0.006518  | -0.039192 | 0.000180  | -0.008492 | -0.021766 | 0.001329  | -0.004213 | -0.008898 | 0.005464  |
| 180 | -0.028535 | -0.003296 | -0.008891 | -0.017021 | 0.013721  | 0.021012  | 0.024374  | -0.000679 | -0.004969 | -0.005151 | 0.009477  | 0.005968  |
| 181 | -0.002941 | -0.010089 | -0.029207 | 0.000245  | 0.023025  | -0.010731 | 0.009781  | 0.020728  | -0.005137 | -0.009585 | 0.012887  | 0.005744  |
| 182 | 0.022239  | -0.016306 | 0.012074  | -0.000292 | -0.013236 | 0.009364  | -0.020861 | 0.006756  | 0.002395  | -0.008999 | -0.005115 | 0.010054  |
| 183 | -0.002189 | -0.009577 | 0.019750  | -0.016180 | -0.004017 | 0.007689  | -0.013921 | 0.017591  | 0.005941  | 0.002109  | -0.014108 | 0.006708  |
| 184 | 0.005758  | -0.008307 | -0.003143 | 0.010077  | -0.024725 | -0.015770 | 0.021973  | 0.013806  | 0.001011  | -0.000490 | -0.000803 | -0.000125 |
| 185 | -0.003764 | 0.003665  | 0.008865  | -0.003601 | -0.058329 | 0.023866  | 0.053435  | -0.024392 | 0.000433  | -0.002091 | 0.000601  | 0.000584  |
| 186 | 0.001543  | -0.002807 | -0.005068 | 0.002859  | 0.007406  | -0.002157 | -0.003890 | 0.002150  | -0.000348 | 0.000366  | -0.000318 | 0.000618  |
| 187 | -0.012654 | 0.011253  | 0.009839  | -0.013840 | 0.041928  | -0.006814 | -0.039203 | 0.009691  | 0.000320  | 0.001426  | -0.000152 | -0.001104 |
| 188 | 0.009576  | -0.003673 | -0.010613 | 0.004643  | 0.033779  | -0.000719 | -0.032716 | 0.000072  | -0.001559 | 0.000737  | 0.000713  | 0.000127  |
| 189 | 0.000653  | -0.000626 | -0.000665 | 0.000408  | 0.000484  | -0.000212 | -0.000471 | 0.000436  | -0.000038 | -0.000040 | 0.000072  | 0.000027  |
| 190 | 0.002049  | -0.003295 | -0.004704 | 0.003111  | 0.007299  | -0.000901 | -0.004543 | 0.001330  | -0.005995 | 0.003596  | 0.001329  | 0.001358  |
| 191 | -0.000923 | -0.001994 | -0.000794 | -0.001584 | 0.002500  | 0.003599  | -0.000798 | -0.000019 | 0.000564  | 0.000297  | -0.000356 | -0.000026 |
| 192 | -0.001894 | 0.002905  | 0.003056  | -0.001992 | -0.003771 | 0.000378  | 0.002627  | -0.001282 | -0.001023 | 0.000718  | 0.000203  | -0.000083 |
| 193 | -0.001022 | 0.001025  | 0.000504  | -0.000565 | -0.000244 | -0.000336 | 0.000862  | -0.000110 | -0.001855 | -0.000394 | 0.000917  | 0.001348  |
| 194 | -0.000282 | 0.000895  | 0.000423  | 0.000336  | -0.000196 | -0.000902 | -0.000049 | -0.000350 | 0.001480  | 0.000777  | -0.001290 | -0.001102 |
| 195 | -0.001447 | 0.003480  | 0.000654  | 0.000909  | -0.000642 | -0.002779 | 0.001705  | -0.001486 | -0.007382 | 0.001051  | 0.002278  | 0.003763  |
| 196 | -0.000435 | 0.000414  | 0.000477  | -0.000449 | 0.000065  | -0.000181 | -0.000137 | 0.000200  | 0.000912  | -0.000251 | -0.000126 | -0.000540 |
| 197 | 0.000416  | -0.000181 | -0.000002 | 0.000169  | 0.000048  | 0.000130  | -0.000461 | -0.000117 | -0.000082 | 0.000022  | -0.000077 | 0.000100  |
| 198 | -0.000356 | 0.000490  | 0.000427  | -0.000272 | -0.000548 | 0.000048  | 0.000485  | -0.000264 | -0.000215 | 0.000068  | 0.000089  | 0.000033  |
| 199 | -0.000267 | 0.000452  | 0.000421  | -0.000186 | -0.000427 | -0.000070 | 0.000276  | -0.000202 | -0.000057 | -0.000001 | -0.000057 | 0.000076  |
| 200 | -0.000952 | 0.000552  | 0.000409  | -0.000612 | -0.000169 | -0.000050 | 0.000673  | 0.000065  | 0.001480  | -0.000523 | -0.000471 | -0.000438 |
| 201 | 0.001440  | 0.000833  | 0.001466  | 0.000406  | -0.001303 | -0.000621 | -0.001489 | -0.000800 | 0.003197  | -0.006019 | 0.001350  | 0.001087  |
| 202 | 0.000833  | -0.000363 | -0.000113 | 0.000308  | 0.000628  | -0.000308 | -0.001357 | 0.000417  | -0.000576 | 0.000667  | 0.000424  | -0.000572 |
| 203 | 0.000758  | -0.000310 | -0.000092 | 0.000346  | 0.001090  | -0.000994 | -0.001777 | 0.000922  | 0.001089  | -0.000793 | -0.000401 | 0.000036  |
| 204 | 0.001119  | -0.000668 | -0.000460 | 0.000849  | 0.000405  | -0.000927 | -0.001011 | 0.000720  | 0.000017  | -0.001426 | 0.000584  | 0.000750  |
| 205 | -0.000106 | -0.001565 | -0.002015 | 0.000177  | -0.000179 | 0.001279  | 0.002261  | 0.000142  | 0.000164  | 0.000958  | 0.000129  | -0.000930 |
| 206 | -0.000982 | 0.000415  | -0.000430 | -0.000899 | 0.000310  | 0.001281  | 0.001372  | -0.000953 | 0.001510  | -0.007362 | 0.003677  | 0.002357  |
| 207 | -0.000192 | -0.000172 | -0.000426 | 0.000094  | 0.000494  | -0.000007 | 0.000090  | 0.000121  | -0.000454 | 0.001258  | -0.000375 | -0.000365 |
| 208 | 0.000277  | -0.000038 | 0.000040  | 0.000183  | 0.000045  | -0.000248 | -0.000369 | 0.000103  | 0.000112  | -0.000006 | -0.000061 | -0.000088 |
| 209 | 0.000205  | -0.000085 | -0.000101 | 0.000177  | 0.000113  | -0.000182 | -0.000212 | 0.000086  | 0.000055  | -0.000207 | 0.000065  | 0.000069  |
| 210 | 0.000152  | 0.000092  | -0.000061 | 0.000161  | -0.000151 | -0.000060 | 0.000060  | -0.000196 | 0.000068  | -0.000087 | 0.000015  | -0.000027 |
| 211 | 0.001154  | -0.000976 | -0.001725 | 0.001611  | 0.002338  | -0.002066 | -0.001816 | 0.001494  | -0.000607 | 0.001448  | -0.000348 | -0.000497 |
| 212 | 0.000794  | 0.000722  | 0.000089  | -0.001291 | -0.000436 | 0.000925  | -0.000589 | -0.000576 | 0.002034  | 0.001306  | -0.006802 | 0.003398  |
| 213 | 0.000523  | 0.001152  | 0.000524  | 0.001173  | -0.000102 | -0.000237 | -0.000883 | -0.002028 | -0.001299 | -0.000153 | 0.001476  | -0.000320 |
| 214 | -0.000771 | -0.000199 | 0.000592  | 0.000198  | -0.000082 | 0.000764  | 0.000234  | -0.000824 | 0.000620  | 0.000078  | -0.001479 | 0.000789  |

|     |           |           |           |           |           |           |           |           |           |           |           |           |
|-----|-----------|-----------|-----------|-----------|-----------|-----------|-----------|-----------|-----------|-----------|-----------|-----------|
| 215 | -0.001011 | 0.000777  | 0.000633  | -0.000874 | -0.000314 | 0.001492  | 0.000647  | -0.001391 | 0.000197  | 0.001071  | -0.000798 | -0.000431 |
| 216 | 0.000380  | -0.000057 | 0.000267  | -0.000609 | -0.000571 | 0.000358  | -0.000025 | 0.000319  | -0.000680 | -0.000493 | 0.000834  | 0.000346  |
| 217 | 0.001744  | -0.002617 | -0.001956 | 0.000105  | 0.000549  | -0.001861 | -0.000556 | 0.004285  | 0.001288  | 0.003374  | -0.005749 | 0.001308  |
| 218 | 0.000766  | 0.000385  | -0.001604 | -0.000615 | 0.000765  | 0.000159  | 0.000121  | 0.000114  | -0.000455 | -0.000553 | 0.001508  | -0.000394 |
| 219 | -0.000110 | 0.000299  | 0.000133  | -0.000120 | -0.000069 | 0.000159  | 0.000047  | -0.000334 | -0.000090 | 0.000090  | 0.000006  | -0.000024 |
| 220 | -0.000169 | 0.000146  | 0.000357  | 0.000033  | -0.000172 | 0.000219  | -0.000020 | -0.000405 | 0.000051  | 0.000049  | -0.000196 | 0.000061  |
| 221 | 0.000023  | 0.000089  | -0.000031 | 0.000033  | -0.000228 | -0.000173 | 0.000233  | 0.000053  | -0.000096 | 0.000134  | -0.000031 | -0.000016 |
| 222 | -0.000384 | 0.000317  | 0.000181  | 0.000080  | 0.000116  | 0.000623  | 0.000132  | -0.000989 | -0.000400 | -0.000530 | 0.001318  | -0.000400 |
| 223 | -0.001853 | 0.001474  | 0.000615  | -0.001151 | 0.000019  | 0.000541  | 0.001067  | -0.000631 | 0.001376  | 0.002309  | 0.003693  | -0.007285 |
| 224 | -0.000457 | 0.001051  | 0.001012  | -0.000629 | -0.000445 | -0.000493 | -0.000107 | -0.000012 | 0.000851  | -0.000959 | -0.001037 | 0.001049  |
| 225 | 0.000494  | -0.000247 | -0.000442 | 0.000343  | 0.000955  | -0.000089 | -0.001023 | 0.000087  | -0.000433 | 0.000779  | 0.001332  | -0.001685 |
| 226 | 0.000046  | -0.000224 | -0.000079 | -0.000076 | -0.000433 | 0.000833  | 0.000416  | -0.000525 | 0.000892  | 0.000352  | -0.000098 | -0.001120 |
| 227 | 0.000767  | 0.000606  | 0.000838  | 0.000552  | -0.001461 | -0.000005 | -0.000077 | -0.001183 | -0.000747 | -0.000858 | 0.000142  | 0.001215  |
| 228 | -0.000920 | 0.000952  | -0.001513 | 0.000799  | 0.002623  | -0.000882 | -0.000392 | -0.000725 | 0.003196  | 0.001473  | 0.001846  | -0.006456 |
| 229 | -0.000933 | 0.000520  | 0.000849  | -0.001151 | -0.000775 | 0.001530  | 0.000917  | -0.000938 | -0.000632 | -0.000450 | -0.000275 | 0.001423  |
| 230 | -0.000202 | 0.000326  | 0.000337  | -0.000261 | -0.000253 | -0.000188 | 0.000118  | 0.000126  | -0.000007 | -0.000007 | 0.000106  | -0.000110 |
| 231 | 0.000133  | -0.000025 | -0.000119 | 0.000180  | 0.000116  | -0.000101 | -0.000135 | -0.000048 | 0.000044  | 0.000066  | 0.000069  | -0.000195 |
| 232 | 0.000219  | -0.000034 | -0.000048 | 0.000167  | 0.000086  | -0.000092 | -0.000255 | -0.000040 | 0.000010  | -0.000079 | 0.000037  | 0.000004  |
| 233 | -0.000226 | -0.000324 | -0.000330 | -0.000159 | 0.000653  | 0.000396  | -0.000066 | 0.000068  | -0.000480 | -0.000141 | -0.000353 | 0.001069  |
| 234 | -0.000059 | 0.005051  | 0.002443  | 0.002769  | -0.002952 | -0.006173 | 0.000609  | -0.001749 | -0.000773 | -0.000921 | -0.001474 | 0.002238  |
| 235 | 0.009214  | -0.014841 | -0.012207 | 0.005725  | 0.015009  | 0.004266  | -0.012224 | 0.004939  | 0.002308  | 0.002537  | -0.003187 | -0.000576 |
| 236 | -0.001286 | 0.000256  | -0.000123 | -0.000914 | 0.000430  | 0.000749  | 0.001018  | -0.000018 | -0.000963 | 0.000282  | 0.001712  | -0.000833 |
| 237 | -0.005824 | 0.004949  | 0.006053  | -0.006053 | -0.006531 | 0.003492  | 0.006401  | -0.002338 | -0.002412 | 0.000842  | 0.002024  | -0.000359 |
| 238 | 0.001595  | -0.001214 | -0.001292 | 0.001400  | 0.001301  | -0.000786 | -0.001610 | 0.000580  | 0.000671  | -0.000693 | -0.000192 | 0.000165  |
| 239 | 0.000649  | -0.000374 | -0.000539 | 0.000657  | 0.000432  | -0.000740 | -0.000546 | 0.000438  | 0.000513  | -0.000561 | -0.000049 | 0.000059  |
| 240 | 0.000348  | -0.000667 | -0.000088 | -0.000122 | 0.000139  | 0.000676  | -0.000458 | 0.000065  | 0.001523  | -0.000135 | -0.001143 | -0.000207 |
| 241 | 0.000831  | -0.001264 | -0.000586 | 0.000222  | 0.000709  | 0.000607  | -0.001014 | 0.000394  | 0.001481  | -0.000093 | -0.001101 | -0.000224 |
| 242 | -0.000832 | 0.000934  | 0.001228  | -0.001025 | -0.001695 | 0.000470  | 0.001280  | -0.000398 | 0.000631  | -0.000101 | -0.000049 | -0.000512 |
| 243 | -0.000649 | 0.000841  | 0.001287  | -0.000864 | -0.001689 | 0.000431  | 0.001019  | -0.000435 | 0.000907  | -0.000120 | -0.000263 | -0.000585 |
| 244 | -0.001277 | 0.002968  | 0.001950  | -0.000749 | -0.002833 | -0.001508 | 0.002281  | -0.000659 | -0.002677 | -0.000199 | 0.001981  | 0.000650  |
| 245 | -0.002689 | 0.003344  | 0.001851  | -0.001025 | -0.002286 | -0.001491 | 0.003215  | -0.000817 | -0.001218 | -0.000854 | 0.001749  | 0.000200  |
| 246 | -0.005316 | 0.000910  | 0.000007  | -0.004089 | -0.005851 | 0.008382  | 0.011306  | -0.005239 | -0.000277 | -0.001520 | 0.002659  | -0.000076 |
| 247 | 0.003651  | 0.000991  | 0.001200  | 0.002279  | 0.001791  | -0.004313 | -0.006863 | 0.001135  | 0.002041  | 0.002170  | -0.001044 | -0.003919 |
| 248 | 0.000398  | 0.000321  | 0.000367  | 0.000335  | 0.001570  | -0.001774 | -0.002306 | 0.001088  | -0.000210 | -0.000732 | -0.000403 | 0.001214  |
| 249 | 0.000854  | 0.000340  | 0.000890  | 0.000426  | 0.001117  | -0.001689 | -0.002798 | 0.000856  | 0.000287  | -0.002050 | -0.000065 | 0.001598  |
| 250 | 0.000422  | -0.000338 | -0.000107 | 0.000376  | -0.000133 | -0.000193 | -0.000204 | 0.000174  | -0.000360 | 0.000789  | -0.000358 | -0.000103 |
| 251 | 0.000227  | -0.000374 | -0.000067 | 0.000110  | -0.000205 | -0.000039 | 0.000031  | 0.000308  | -0.000224 | 0.000508  | -0.000381 | 0.000106  |
| 252 | -0.000280 | -0.000219 | -0.000380 | -0.000166 | -0.000182 | 0.000649  | 0.000789  | -0.000216 | -0.000120 | 0.001453  | -0.000155 | -0.001083 |
| 253 | -0.000203 | -0.000264 | -0.000460 | -0.000073 | -0.000185 | 0.000528  | 0.000793  | -0.000144 | -0.000102 | 0.001455  | -0.000182 | -0.001080 |
| 254 | 0.000113  | 0.000438  | 0.000543  | -0.000022 | 0.000430  | -0.000607 | -0.001111 | 0.000206  | -0.000205 | 0.000645  | -0.000420 | -0.000118 |
| 255 | -0.000007 | 0.000600  | 0.000534  | 0.000013  | -0.000091 | -0.000438 | -0.000470 | -0.000157 | -0.000171 | 0.000880  | -0.000495 | -0.000318 |
| 256 | 0.000979  | -0.002012 | -0.002108 | 0.001218  | 0.001510  | -0.001232 | -0.000284 | 0.001957  | 0.000075  | -0.002451 | 0.000560  | 0.001994  |
| 257 | -0.000830 | -0.000401 | -0.000421 | -0.000406 | 0.000235  | 0.000721  | 0.001106  | 0.000044  | -0.000749 | -0.001150 | 0.000297  | 0.001794  |
| 258 | 0.007993  | -0.008076 | -0.008217 | 0.003500  | 0.004262  | -0.009382 | -0.004123 | 0.014197  | -0.002733 | 0.003092  | 0.001563  | -0.001468 |
| 259 | -0.000517 | 0.007356  | 0.003225  | -0.002324 | -0.003294 | 0.002505  | 0.000742  | -0.007606 | -0.001714 | -0.001350 | -0.000098 | 0.002464  |
| 260 | -0.002066 | 0.001283  | 0.001975  | -0.000709 | -0.000583 | 0.002298  | 0.000667  | -0.002969 | 0.001609  | -0.001090 | -0.001064 | 0.000490  |
| 261 | -0.001912 | -0.001071 | 0.001406  | 0.002440  | 0.000281  | 0.000487  | 0.000139  | -0.001971 | 0.001982  | 0.000053  | -0.002771 | 0.000639  |
| 262 | 0.000004  | 0.000533  | -0.000307 | -0.001225 | -0.000061 | 0.000673  | 0.000385  | 0.000051  | -0.000248 | -0.000085 | 0.000932  | -0.000504 |
| 263 | -0.000144 | 0.000144  | -0.000297 | -0.001008 | 0.000049  | 0.000684  | 0.000398  | 0.000199  | 0.000031  | -0.000058 | 0.000595  | -0.000448 |
| 264 | 0.000382  | 0.000219  | 0.000083  | 0.000813  | 0.000017  | -0.000732 | -0.000431 | -0.000245 | -0.001135 | -0.000170 | 0.001450  | -0.000271 |

|     |           |           |           |           |           |           |           |           |           |           |           |           |
|-----|-----------|-----------|-----------|-----------|-----------|-----------|-----------|-----------|-----------|-----------|-----------|-----------|
| 265 | 0.000225  | 0.000707  | 0.000388  | 0.000367  | -0.000272 | -0.000315 | -0.000281 | -0.000706 | -0.001188 | -0.000226 | 0.001509  | -0.000237 |
| 266 | 0.000025  | -0.000365 | -0.000171 | 0.000646  | 0.000284  | -0.000436 | -0.000132 | 0.000163  | 0.000037  | -0.000242 | 0.000418  | -0.000223 |
| 267 | 0.000375  | -0.000550 | -0.000593 | 0.000728  | 0.000296  | -0.000907 | -0.000065 | 0.000747  | -0.000151 | -0.000286 | 0.000675  | -0.000231 |
| 268 | -0.004201 | 0.001996  | 0.002817  | -0.003316 | -0.001733 | 0.005094  | 0.003065  | -0.003883 | 0.001823  | 0.000232  | -0.002128 | 0.000304  |
| 269 | -0.000121 | -0.002207 | -0.000335 | 0.000114  | 0.000788  | -0.000005 | -0.000415 | 0.002061  | 0.001691  | 0.000125  | -0.001081 | -0.000514 |
| 270 | 0.001514  | 0.001408  | 0.000933  | 0.002102  | -0.002872 | -0.000050 | 0.000510  | -0.003685 | 0.001901  | -0.003943 | -0.001563 | 0.003049  |
| 271 | -0.002697 | 0.002894  | 0.003569  | -0.004011 | -0.001928 | -0.001577 | 0.001071  | 0.002711  | 0.000331  | -0.000807 | 0.001710  | -0.001207 |
| 272 | -0.000703 | -0.001169 | -0.001899 | 0.000070  | 0.003206  | 0.000121  | -0.000637 | 0.001106  | -0.000996 | 0.001907  | 0.001008  | -0.001573 |
| 273 | 0.000260  | -0.001561 | -0.002248 | 0.000847  | 0.003498  | -0.000075 | -0.001594 | 0.000946  | -0.000270 | 0.002212  | 0.001245  | -0.002934 |
| 274 | -0.000588 | 0.000478  | 0.001004  | -0.000903 | -0.001508 | 0.000493  | 0.001101  | -0.000118 | 0.000094  | -0.000215 | -0.000742 | 0.000860  |
| 275 | 0.000052  | 0.000109  | 0.000446  | -0.000124 | -0.001223 | 0.000561  | 0.000725  | -0.000586 | 0.000100  | -0.000070 | -0.000762 | 0.000684  |
| 276 | 0.001081  | 0.000261  | 0.000856  | 0.000363  | -0.001402 | -0.000445 | -0.000487 | -0.000255 | -0.000013 | -0.001243 | -0.000669 | 0.001689  |
| 277 | 0.000829  | 0.000308  | 0.000932  | 0.000137  | -0.001423 | -0.000312 | -0.000287 | -0.000206 | -0.000087 | -0.001221 | -0.000564 | 0.001668  |
| 278 | -0.000363 | -0.000646 | -0.000909 | -0.000128 | 0.001642  | -0.000010 | -0.000342 | 0.000807  | -0.000664 | 0.000058  | 0.000393  | 0.000403  |
| 279 | -0.000544 | -0.000367 | -0.000685 | -0.000197 | 0.001568  | -0.000076 | -0.000297 | 0.000654  | -0.000754 | -0.000137 | 0.000392  | 0.000667  |
| 280 | 0.000654  | -0.000982 | -0.000516 | 0.000407  | -0.000352 | 0.000865  | 0.000110  | -0.000198 | 0.000379  | 0.002048  | 0.000225  | -0.002612 |
| 281 | 0.000494  | -0.000729 | -0.001477 | 0.001429  | 0.000790  | 0.000508  | 0.000136  | -0.001174 | -0.000036 | 0.001419  | -0.000665 | -0.000695 |
| 282 | -0.001005 | 0.000658  | 0.002645  | -0.001972 | -0.003612 | 0.001197  | 0.001718  | 0.000167  | 0.002355  | 0.003504  | -0.001728 | -0.004178 |
| 283 | 0.001423  | -0.001413 | -0.000409 | 0.000531  | 0.000407  | 0.000333  | -0.001414 | 0.000554  | -0.000020 | -0.000226 | 0.000087  | 0.000146  |
| 284 | -0.000105 | -0.000087 | 0.000081  | -0.000316 | 0.000184  | 0.000405  | -0.000126 | 0.000003  | -0.000542 | -0.000195 | 0.000301  | 0.000477  |
| 285 | 0.000262  | -0.000278 | -0.000580 | 0.000398  | 0.001158  | -0.000058 | -0.000806 | -0.000064 | -0.000337 | -0.000435 | 0.000234  | 0.000559  |
| 286 | 0.000332  | 0.000023  | -0.000658 | 0.000744  | 0.001143  | -0.000578 | -0.000808 | -0.000198 | 0.000150  | -0.000424 | -0.000025 | 0.000258  |
| 287 | 0.002300  | -0.002067 | -0.002115 | 0.001847  | 0.003517  | -0.000026 | -0.003675 | 0.000311  | -0.000887 | 0.000153  | 0.000657  | 0.000086  |
| 288 | 0.000791  | -0.000434 | -0.000827 | 0.001267  | -0.000306 | -0.001022 | 0.000161  | 0.000105  | 0.003088  | 0.000875  | -0.002989 | -0.001070 |
| 289 | 0.001266  | -0.001274 | -0.001938 | 0.001755  | 0.001221  | -0.001570 | -0.000550 | 0.001106  | -0.000200 | 0.000023  | 0.000155  | 0.000041  |
| 290 | -0.000815 | 0.000706  | 0.000425  | -0.000564 | -0.000341 | 0.000415  | 0.000770  | -0.000560 | -0.000320 | -0.000442 | 0.000533  | 0.000254  |
| 291 | -0.000406 | 0.000449  | 0.000373  | -0.000356 | -0.000251 | 0.000169  | 0.000309  | -0.000246 | -0.000537 | 0.000000  | 0.000463  | 0.000072  |
| 292 | 0.000193  | -0.000169 | 0.000286  | -0.000222 | -0.000191 | 0.000158  | -0.000287 | 0.000249  | -0.000317 | 0.000271  | 0.000090  | -0.000051 |
| 293 | 0.000312  | -0.000121 | -0.000157 | 0.000166  | 0.000049  | -0.000378 | -0.000211 | 0.000316  | 0.000234  | -0.000136 | -0.000327 | 0.000208  |
| 294 | -0.002463 | 0.002180  | -0.000355 | -0.000159 | -0.000836 | 0.001034  | 0.003609  | -0.002930 | -0.001091 | 0.002526  | 0.001131  | -0.002483 |
| 295 | -0.002342 | 0.001617  | 0.001508  | -0.001688 | -0.002233 | 0.002345  | 0.003113  | -0.002315 | -0.000156 | -0.000455 | 0.000108  | 0.000587  |
| 296 | 0.000860  | -0.000692 | -0.000201 | 0.000364  | 0.000685  | -0.000623 | -0.001339 | 0.000963  | -0.000068 | -0.000195 | 0.000262  | -0.000028 |
| 297 | 0.000554  | -0.000431 | 0.000215  | -0.000031 | 0.000225  | -0.000317 | -0.000983 | 0.000764  | 0.000039  | -0.000411 | -0.000078 | 0.000422  |
| 298 | -0.000286 | 0.000164  | 0.000365  | -0.000291 | -0.000160 | 0.000107  | 0.000084  | -0.000015 | 0.000264  | -0.000334 | -0.000479 | 0.000550  |
| 299 | -0.001283 | 0.000743  | 0.001734  | -0.001428 | -0.001050 | 0.001157  | 0.000598  | -0.000480 | 0.000015  | 0.000146  | -0.000074 | -0.000067 |
| 300 | 0.000486  | -0.000048 | 0.000393  | -0.000185 | -0.000479 | -0.000766 | -0.000547 | 0.000832  | 0.003967  | -0.000776 | -0.003410 | 0.000131  |
| 301 | 0.000245  | -0.000049 | -0.000449 | 0.000671  | 0.000502  | -0.000163 | -0.000267 | -0.000466 | -0.000206 | -0.000504 | 0.000258  | 0.000416  |
| 302 | -0.000134 | -0.000014 | -0.000083 | -0.000019 | -0.000011 | -0.000035 | 0.000250  | 0.000070  | -0.000406 | -0.000096 | 0.000164  | 0.000363  |
| 303 | 0.000062  | -0.000083 | -0.000293 | 0.000234  | 0.000170  | -0.000013 | 0.000086  | -0.000112 | -0.000630 | 0.000065  | 0.000556  | 0.000022  |
| 304 | 0.000738  | -0.000492 | -0.000212 | 0.000295  | -0.000196 | 0.000027  | -0.000327 | 0.000201  | -0.000363 | 0.000221  | 0.000486  | -0.000370 |
| 305 | 0.000573  | -0.000665 | -0.001464 | 0.001251  | 0.001071  | -0.000116 | -0.000178 | -0.000479 | 0.000138  | -0.000170 | -0.000194 | 0.000254  |
| 306 | 0.007699  | -0.008316 | -0.007222 | 0.005406  | 0.010232  | 0.002135  | -0.009587 | 0.001830  | -0.028083 | 0.002417  | 0.021550  | 0.004527  |
| 307 | 0.002783  | -0.002582 | -0.001995 | 0.001854  | 0.003177  | -0.000181 | -0.003938 | 0.000909  | 0.000047  | -0.000847 | 0.000033  | 0.000761  |
| 308 | -0.001750 | 0.001370  | 0.001785  | -0.001664 | -0.002408 | 0.000687  | 0.002323  | -0.000378 | 0.000156  | 0.001133  | -0.000189 | -0.001078 |
| 309 | -0.000569 | 0.000653  | 0.000707  | -0.000520 | -0.001222 | 0.000010  | 0.001047  | -0.000156 | 0.000543  | 0.000329  | -0.000403 | -0.000498 |
| 310 | -0.000020 | -0.000064 | -0.000454 | 0.000284  | 0.000638  | -0.000262 | -0.000144 | 0.000029  | -0.000050 | -0.000407 | 0.000052  | 0.000429  |
| 311 | 0.000515  | -0.000590 | -0.000384 | 0.000129  | 0.000733  | 0.000219  | -0.000783 | 0.000244  | -0.001052 | -0.000801 | 0.000674  | 0.001216  |
| 312 | -0.000977 | 0.001213  | 0.000369  | -0.000122 | -0.000955 | -0.000438 | 0.001522  | -0.000646 | 0.000358  | 0.000625  | -0.000172 | -0.000856 |
| 313 | 0.005077  | -0.004475 | -0.004723 | 0.003921  | 0.002211  | -0.003891 | -0.001636 | 0.003671  | 0.001887  | -0.023748 | 0.003845  | 0.018041  |
| 314 | 0.000075  | 0.000220  | 0.000499  | -0.000013 | -0.000667 | 0.000236  | 0.000114  | -0.000406 | -0.000887 | 0.000415  | 0.000546  | -0.000140 |

|     |            |           |           |           |           |           |           |           |           |           |           |           |
|-----|------------|-----------|-----------|-----------|-----------|-----------|-----------|-----------|-----------|-----------|-----------|-----------|
| 315 | -0.000256  | 0.000149  | -0.000583 | 0.000325  | 0.000254  | -0.000403 | 0.000559  | -0.000108 | 0.000889  | -0.000309 | -0.000555 | 0.000003  |
| 316 | 0.000131   | -0.000205 | 0.000038  | -0.000063 | -0.000003 | 0.000086  | -0.000190 | 0.000177  | 0.000362  | 0.000188  | -0.000348 | -0.000196 |
| 317 | -0.000236  | 0.000380  | 0.000650  | -0.000383 | -0.000369 | 0.000329  | -0.000033 | -0.000313 | -0.000380 | 0.000143  | 0.000241  | -0.000039 |
| 318 | -0.001038  | 0.000819  | 0.000487  | -0.000740 | -0.000317 | 0.000839  | 0.000945  | -0.000910 | -0.000875 | -0.000730 | 0.001135  | 0.000521  |
| 319 | 0.001330   | -0.001349 | -0.001082 | 0.000880  | 0.001118  | -0.001111 | -0.001428 | 0.001563  | 0.000907  | 0.000285  | -0.001027 | -0.000152 |
| 320 | -0.0008674 | 0.005453  | 0.005134  | -0.008024 | -0.007204 | 0.007517  | 0.011687  | -0.004222 | -0.017459 | -0.002524 | 0.022923  | -0.002229 |
| 321 | -0.000532  | 0.000212  | 0.001252  | -0.000733 | -0.000351 | 0.000364  | -0.000336 | 0.000111  | 0.000042  | -0.000764 | -0.000321 | 0.001024  |
| 322 | 0.000192   | -0.000061 | -0.000731 | 0.000355  | 0.000250  | -0.000109 | 0.000276  | -0.000122 | -0.000488 | 0.000796  | 0.000775  | -0.001055 |
| 323 | -0.000149  | 0.000265  | -0.000495 | 0.000413  | 0.000099  | -0.000195 | 0.000535  | -0.000477 | 0.000042  | 0.000241  | -0.000078 | -0.000208 |
| 324 | 0.000580   | -0.000406 | -0.000030 | 0.000121  | 0.000291  | -0.000370 | -0.000842 | 0.000642  | 0.000162  | -0.000240 | -0.000228 | 0.000280  |
| 325 | 0.001735   | -0.001530 | -0.000436 | 0.000767  | 0.001364  | -0.001233 | -0.002651 | 0.002005  | -0.000055 | -0.000540 | 0.000282  | 0.000265  |
| 326 | -0.001782  | 0.001501  | 0.000428  | -0.000903 | -0.001632 | 0.001516  | 0.002968  | -0.002134 | 0.000294  | 0.000486  | -0.000415 | -0.000298 |
| 327 | 0.000461   | -0.002352 | -0.002266 | 0.001038  | 0.002564  | 0.001921  | 0.000270  | -0.001598 | -0.002521 | -0.020617 | -0.004111 | 0.027526  |
| 328 | 0.001090   | -0.000586 | -0.000213 | 0.000434  | -0.000219 | 0.000084  | -0.000619 | 0.000121  | -0.000977 | 0.000017  | 0.001192  | -0.000290 |
| 329 | -0.000471  | 0.000267  | 0.000044  | -0.000110 | 0.000113  | -0.000280 | 0.000289  | 0.000056  | 0.001027  | -0.000433 | -0.001153 | 0.000576  |
| 330 | -0.000002  | 0.000075  | 0.000437  | -0.000403 | -0.000409 | -0.000035 | -0.000057 | 0.000348  | 0.000556  | 0.000114  | -0.000453 | -0.000231 |
| 331 | -0.000263  | 0.000230  | 0.000121  | -0.000126 | 0.000004  | 0.000119  | 0.000152  | -0.000195 | -0.000488 | 0.000222  | 0.000502  | -0.000229 |
| 332 | 0.000017   | -0.000180 | 0.000018  | -0.000117 | -0.000101 | 0.000229  | 0.000119  | 0.000099  | -0.001146 | -0.000056 | 0.000821  | 0.000412  |
| 333 | -0.000391  | 0.000203  | -0.000404 | 0.000310  | 0.000622  | -0.000122 | 0.000124  | -0.000421 | 0.001008  | 0.000135  | -0.000897 | -0.000228 |

|    | 73        | 74        | 75        | 76        | 77        | 78        | 79        | 80        | 81        | 82        | 83        | 84        |
|----|-----------|-----------|-----------|-----------|-----------|-----------|-----------|-----------|-----------|-----------|-----------|-----------|
| 1  | -0.011534 | -0.000543 | -0.001762 | -0.035296 | -0.033497 | -0.002354 | -0.001230 | -0.013573 | -0.027744 | 0.005926  | 0.005226  | -0.024542 |
| 2  | 0.026680  | -0.009582 | -0.008254 | 0.018586  | 0.015188  | -0.007445 | -0.008558 | 0.025122  | 0.025165  | 0.000158  | -0.002602 | 0.033435  |
| 3  | -0.023272 | 0.237725  | 0.237483  | -0.029240 | -0.560107 | -0.078023 | 0.095090  | 0.034212  | 0.030554  | 0.004070  | 0.003675  | 0.027180  |
| 4  | 0.029981  | 0.093105  | -0.074636 | -0.548639 | -0.029996 | 0.243130  | 0.240586  | -0.027988 | -0.563215 | -0.068676 | 0.100604  | 0.017490  |
| 5  | 0.030293  | 0.005044  | 0.005743  | 0.024977  | 0.020345  | 0.102788  | -0.068159 | -0.585245 | -0.015748 | 0.240948  | 0.235079  | -0.021974 |
| 6  | -0.587125 | -0.067408 | 0.102596  | 0.017776  | 0.028541  | 0.005516  | 0.005131  | 0.032562  | 0.007646  | 0.107435  | -0.062317 | -0.588577 |
| 7  | -0.018702 | 0.006608  | 0.005056  | -0.003416 | -0.004939 | 0.002126  | 0.003214  | -0.011828 | -0.009432 | 0.002115  | 0.000526  | -0.003800 |
| 8  | 0.923753  | 0.634965  | 0.377801  | -0.120203 | -0.046313 | 0.018473  | 0.011792  | -0.028051 | 0.003291  | 0.000710  | -0.000823 | 0.010059  |
| 9  | -0.109129 | 0.374717  | 0.624581  | 0.922533  | -0.466109 | -0.137804 | 0.029509  | 0.179683  | 0.010280  | -0.000696 | 0.000942  | 0.004127  |
| 10 | 0.172726  | 0.029395  | -0.130902 | -0.468810 | 0.934607  | 0.646015  | 0.375435  | -0.127680 | -0.038591 | 0.017574  | 0.010819  | -0.025638 |
| 11 | -0.026485 | 0.011095  | 0.017472  | -0.040848 | -0.122616 | 0.374679  | 0.643740  | 0.935729  | -0.466162 | -0.132935 | 0.030515  | 0.174133  |
| 12 | 0.004053  | 0.000577  | -0.000688 | 0.011661  | 0.179585  | 0.028803  | -0.136633 | -0.465741 | 0.938591  | 0.620824  | 0.362619  | -0.102146 |
| 13 | 0.008980  | 0.000628  | 0.001774  | 0.000665  | -0.028776 | 0.012595  | 0.019696  | -0.044547 | -0.109612 | 0.364681  | 0.623733  | 0.927353  |
| 14 | -0.045640 | 0.019303  | 0.012589  | -0.028067 | 0.003160  | 0.000999  | -0.000385 | 0.008893  | 0.172874  | 0.031753  | -0.132017 | -0.465388 |
| 15 | -0.465392 | -0.136218 | 0.028069  | 0.178608  | 0.013876  | -0.001752 | -0.000400 | 0.006209  | -0.027626 | 0.011598  | 0.017868  | -0.046519 |
| 16 | 0.706160  | 0.412992  | -0.813841 | -0.429540 | 0.163383  | -0.014351 | 0.002864  | 0.031893  | -0.004118 | -0.008742 | -0.008220 | 0.031611  |
| 17 | -1.118440 | -0.590016 | -0.588689 | -1.111730 | 0.258923  | -0.058274 | -0.054153 | 0.078828  | 0.042347  | -0.016478 | -0.015841 | 0.045998  |
| 18 | -0.429843 | -0.820501 | 0.407502  | 0.706513  | -0.154328 | -0.011252 | -0.021890 | 0.021173  | 0.033223  | -0.008536 | -0.008887 | -0.004069 |
| 19 | 0.020704  | -0.022512 | -0.011156 | -0.160934 | 0.719318  | 0.418053  | -0.817571 | -0.441229 | 0.165224  | -0.013339 | 0.003558  | 0.030970  |
| 20 | 0.078476  | -0.053654 | -0.057600 | 0.263919  | -1.124130 | -0.598007 | -0.595005 | -1.122890 | 0.264265  | -0.060014 | -0.054392 | 0.079860  |
| 21 | 0.030833  | 0.003707  | -0.013572 | 0.169670  | -0.442020 | -0.818218 | 0.415468  | 0.721481  | -0.157377 | -0.011458 | -0.022890 | 0.021355  |
| 22 | -0.002650 | -0.009522 | -0.008661 | 0.034759  | 0.022774  | -0.022232 | -0.011469 | -0.154496 | 0.705183  | 0.405265  | -0.816846 | -0.433357 |
| 23 | 0.044843  | -0.016357 | -0.016686 | 0.045789  | 0.080693  | -0.055745 | -0.060289 | 0.266927  | -1.121520 | -0.586145 | -0.585668 | -1.132810 |
| 24 | 0.031962  | -0.007730 | -0.008602 | -0.007128 | 0.031006  | 0.004538  | -0.012532 | 0.161029  | -0.433640 | -0.814326 | 0.404471  | 0.695801  |
| 25 | 0.162278  | -0.012699 | 0.004350  | 0.031766  | -0.005777 | -0.008400 | -0.008063 | 0.031415  | 0.020179  | -0.022645 | -0.011056 | -0.156206 |
| 26 | 0.265057  | -0.059714 | -0.055259 | 0.079816  | 0.046501  | -0.016542 | -0.016429 | 0.044289  | 0.081548  | -0.056005 | -0.060326 | 0.269508  |
| 27 | -0.155202 | -0.012135 | -0.022910 | 0.022186  | 0.033769  | -0.008996 | -0.009575 | -0.002231 | 0.032889  | 0.001941  | -0.014874 | 0.166837  |
| 28 | -0.205517 | -0.117038 | 0.261148  | 0.981820  | 0.549459  | -0.214996 | -0.225113 | 0.238113  | 0.115917  | -0.064523 | -0.053074 | 0.167374  |



|    |           |           |           |           |           |           |           |           |           |           |           |           |
|----|-----------|-----------|-----------|-----------|-----------|-----------|-----------|-----------|-----------|-----------|-----------|-----------|
| 29 | 0.235605  | -0.222879 | -0.212296 | 0.531600  | 1.005520  | 0.270842  | -0.118247 | -0.219798 | 0.144041  | -0.063417 | -0.056536 | 0.151473  |
| 30 | 0.149618  | -0.055873 | -0.061599 | 0.148426  | -0.212899 | -0.117137 | 0.268052  | 0.999063  | 0.553518  | -0.217909 | -0.227150 | 0.235291  |
| 31 | 0.165872  | -0.052929 | -0.063723 | 0.118871  | 0.237433  | -0.224607 | -0.215742 | 0.546348  | 1.007390  | 0.260194  | -0.124012 | -0.206914 |
| 32 | 0.115595  | -0.062568 | -0.052575 | 0.162094  | 0.148159  | -0.054518 | -0.060999 | 0.137354  | -0.204406 | -0.123358 | 0.259967  | 1.001000  |
| 33 | 0.139060  | -0.060991 | -0.054506 | 0.147016  | 0.165219  | -0.051751 | -0.062825 | 0.113537  | 0.241206  | -0.229074 | -0.217758 | 0.560511  |
| 34 | 0.546681  | -0.217524 | -0.224990 | 0.239424  | 0.120894  | -0.065133 | -0.053149 | 0.168380  | 0.149062  | -0.056089 | -0.062386 | 0.148135  |
| 35 | 0.996646  | 0.267248  | -0.116341 | -0.208857 | 0.141704  | -0.062323 | -0.056563 | 0.148847  | 0.164844  | -0.054250 | -0.064044 | 0.116757  |
| 36 | -0.016366 | -0.131556 | 0.031846  | 0.051785  | -0.009249 | 0.002314  | 0.001518  | -0.003211 | -0.002942 | 0.001276  | 0.001360  | -0.004800 |
| 37 | 0.050858  | 0.032150  | -0.131273 | -0.014226 | 0.013195  | 0.003014  | 0.002644  | -0.004238 | -0.004512 | 0.001223  | 0.001186  | -0.002698 |
| 38 | -0.004799 | 0.003147  | 0.003408  | 0.015138  | -0.019014 | -0.132557 | 0.032196  | 0.053288  | -0.009524 | 0.002362  | 0.001561  | -0.003342 |
| 39 | -0.003361 | 0.001664  | 0.002503  | -0.010066 | 0.052923  | 0.032215  | -0.132753 | -0.017705 | 0.014241  | 0.002989  | 0.002763  | -0.004201 |
| 40 | -0.002841 | 0.001182  | 0.001206  | -0.004342 | -0.004150 | 0.002531  | 0.002878  | 0.013501  | -0.016023 | -0.130937 | 0.032024  | 0.051019  |
| 41 | -0.004749 | 0.001289  | 0.001244  | -0.002796 | -0.003328 | 0.001635  | 0.002513  | -0.009977 | 0.052078  | 0.031875  | -0.131718 | -0.017574 |
| 42 | -0.009633 | 0.002400  | 0.001512  | -0.003220 | -0.002563 | 0.001126  | 0.001190  | -0.004244 | -0.004053 | 0.002589  | 0.002905  | 0.013155  |
| 43 | 0.014173  | 0.003116  | 0.002834  | -0.004269 | -0.004659 | 0.001270  | 0.001240  | -0.002933 | -0.003401 | 0.001705  | 0.002561  | -0.010060 |
| 44 | -0.016837 | 0.000318  | -0.000176 | 0.014475  | 0.031215  | 0.005584  | 0.001240  | -0.027060 | 0.014823  | -0.003673 | -0.003242 | 0.009776  |
| 45 | 0.009644  | -0.003031 | -0.003395 | 0.014111  | -0.022611 | 0.001227  | 0.003550  | 0.025646  | 0.018038  | -0.000632 | 0.000782  | -0.016961 |
| 46 | 0.013836  | -0.003262 | -0.002793 | 0.009269  | 0.009181  | -0.002698 | -0.003065 | 0.013256  | -0.022166 | 0.001121  | 0.002845  | 0.025113  |
| 47 | 0.026431  | 0.003830  | 0.001115  | -0.024374 | 0.014564  | -0.003543 | -0.003117 | 0.009866  | 0.010292  | -0.003364 | -0.003769 | 0.014884  |
| 48 | -0.001137 | 0.001486  | 0.000955  | -0.000165 | -0.000920 | 0.000905  | 0.000826  | 0.001595  | 0.002794  | 0.003422  | 0.002741  | 0.004184  |
| 49 | 0.001178  | -0.001447 | -0.001352 | 0.002108  | 0.001878  | -0.001326 | -0.001105 | 0.000960  | 0.001444  | -0.001614 | -0.001706 | -0.000186 |
| 50 | 0.004040  | -0.004994 | -0.004252 | -0.000939 | -0.003435 | 0.001616  | 0.000663  | -0.000619 | 0.001329  | 0.000915  | 0.001294  | -0.003740 |
| 51 | -0.000504 | -0.003994 | -0.004130 | 0.000413  | 0.002301  | -0.002156 | -0.002281 | -0.000278 | 0.001594  | -0.001033 | -0.001389 | 0.001801  |
| 52 | 0.002259  | 0.009808  | 0.008918  | 0.002002  | -0.002448 | 0.004890  | 0.005646  | -0.001586 | -0.000641 | -0.002802 | -0.002829 | 0.001567  |
| 53 | 0.000075  | -0.000005 | -0.000037 | -0.000627 | -0.000385 | 0.000161  | 0.000267  | -0.000754 | 0.000832  | -0.000091 | -0.000074 | 0.000434  |
| 54 | 0.000067  | -0.000460 | -0.000473 | 0.000081  | -0.000041 | -0.000197 | -0.000180 | 0.000059  | 0.000081  | -0.000184 | -0.000218 | 0.000078  |
| 55 | 0.000284  | 0.001102  | 0.001022  | 0.000593  | 0.000290  | 0.000457  | 0.000640  | 0.000189  | 0.000022  | 0.000284  | 0.000301  | -0.000061 |
| 56 | 0.002804  | 0.000510  | 0.000718  | 0.002139  | -0.000494 | 0.001212  | 0.001037  | -0.001133 | -0.000178 | 0.000134  | 0.000126  | -0.000961 |
| 57 | -0.000090 | -0.000064 | -0.000116 | 0.000069  | 0.000043  | -0.000070 | -0.000063 | -0.000123 | 0.000095  | -0.000237 | -0.000232 | 0.000112  |
| 58 | -0.000068 | -0.000210 | -0.000273 | -0.000224 | 0.000038  | -0.000252 | -0.000241 | 0.000059  | 0.000039  | -0.000293 | -0.000322 | 0.000008  |
| 59 | -0.000009 | -0.000315 | -0.000303 | 0.000192  | -0.000149 | -0.000194 | -0.000197 | -0.000257 | -0.000060 | -0.000360 | -0.000374 | 0.000098  |
| 60 | 0.002561  | -0.000146 | 0.000824  | 0.009080  | 0.008264  | 0.001216  | 0.000060  | 0.002132  | 0.018085  | -0.005362 | -0.003363 | 0.001697  |
| 61 | 0.001389  | -0.003246 | -0.003260 | -0.009681 | 0.014984  | 0.004243  | -0.000909 | -0.004339 | 0.038858  | -0.019917 | -0.020612 | 0.053126  |
| 62 | 0.022540  | -0.008434 | -0.004206 | 0.000160  | -0.019117 | -0.006363 | -0.005401 | 0.029563  | -0.065069 | 0.016785  | 0.026071  | -0.013820 |
| 63 | 0.010385  | -0.000013 | 0.002206  | -0.001512 | 0.023237  | -0.000769 | -0.004076 | 0.001913  | 0.012141  | -0.003936 | 0.001429  | 0.002464  |
| 64 | 0.012971  | -0.014015 | -0.016159 | 0.051500  | 0.031788  | -0.006523 | -0.003560 | 0.028407  | -0.051513 | 0.010017  | 0.016707  | -0.029481 |
| 65 | -0.012255 | 0.002323  | -0.004363 | -0.004849 | -0.005533 | -0.006661 | -0.001384 | 0.008873  | -0.027734 | 0.006988  | 0.005714  | -0.008411 |
| 66 | -0.005561 | 0.007457  | 0.007458  | -0.025760 | -0.026628 | 0.003352  | 0.002986  | -0.021048 | 0.049386  | -0.005265 | -0.012016 | 0.009328  |
| 67 | 0.008247  | 0.003259  | 0.002760  | 0.008685  | -0.010433 | -0.005687 | -0.002494 | 0.016095  | -0.031055 | 0.014475  | 0.016126  | -0.040027 |
| 68 | -0.009431 | 0.006902  | 0.004805  | -0.005362 | 0.007239  | 0.007045  | 0.008124  | -0.029640 | 0.046825  | -0.013362 | -0.022675 | 0.013071  |
| 69 | -0.374559 | 0.063038  | 0.142394  | -0.140712 | -0.142795 | 0.143340  | 0.063648  | -0.379998 | 0.309762  | -0.084967 | -0.119131 | 0.204192  |
| 70 | 0.196843  | -0.114914 | -0.080852 | 0.305093  | -0.370326 | 0.058620  | 0.138486  | -0.134542 | -0.131668 | 0.140731  | 0.059318  | -0.369493 |
| 71 | 0.313165  | -0.084646 | -0.118828 | 0.204496  | 0.202462  | -0.120745 | -0.085329 | 0.315836  | -0.374661 | 0.063677  | 0.142949  | -0.154907 |
| 72 | -0.137122 | 0.138288  | 0.058232  | -0.371211 | 0.307303  | -0.081364 | -0.116097 | 0.196306  | 0.199861  | -0.119118 | -0.084260 | 0.317670  |
| 73 | 2.866510  | -0.297198 | -0.698421 | 0.921075  | -0.150595 | 0.068643  | 0.076666  | -0.061854 | -0.152662 | 0.029694  | 0.042457  | -0.017733 |
| 74 | -0.297198 | 1.494620  | 0.301874  | -0.703137 | 0.164386  | -0.045131 | -0.034337 | 0.076953  | 0.028925  | -0.014863 | -0.013498 | 0.043751  |
| 75 | -0.698421 | 0.301874  | 1.488570  | -0.302532 | 0.041446  | -0.040366 | -0.044596 | 0.068341  | 0.042862  | -0.013892 | -0.014764 | 0.030720  |
| 76 | 0.921075  | -0.703137 | -0.302532 | 2.861570  | -0.998437 | 0.038065  | 0.166185  | -0.147684 | -0.014701 | 0.043993  | 0.029648  | -0.157348 |
| 77 | -0.150595 | 0.164386  | 0.041446  | -0.998437 | 2.868480  | -0.292254 | -0.702275 | 0.908862  | -0.152368 | 0.070896  | 0.078391  | -0.064092 |
| 78 | 0.068643  | -0.045131 | -0.040366 | 0.038065  | -0.292254 | 1.496490  | 0.305979  | -0.704508 | 0.166478  | -0.045951 | -0.035184 | 0.078334  |

|     |           |           |           |           |           |           |           |           |           |           |           |           |
|-----|-----------|-----------|-----------|-----------|-----------|-----------|-----------|-----------|-----------|-----------|-----------|-----------|
| 79  | 0.076666  | -0.034337 | -0.044596 | 0.166185  | -0.702275 | 0.305979  | 1.496340  | -0.294346 | 0.041540  | -0.041817 | -0.045854 | 0.070661  |
| 80  | -0.061854 | 0.076953  | 0.068341  | -0.147684 | 0.908862  | -0.704508 | -0.294346 | 2.876200  | -0.999492 | 0.045412  | 0.168600  | -0.156475 |
| 81  | -0.152662 | 0.028925  | 0.042862  | -0.014701 | -0.152368 | 0.166478  | 0.041540  | -0.999492 | 2.862900  | -0.305375 | -0.706084 | 0.908364  |
| 82  | 0.029694  | -0.014863 | -0.013892 | 0.043993  | 0.070896  | -0.045951 | -0.041817 | 0.045412  | -0.305375 | 1.494480  | 0.307535  | -0.707543 |
| 83  | 0.042457  | -0.013498 | -0.014764 | 0.029648  | 0.078391  | -0.035184 | -0.045854 | 0.168600  | -0.706084 | 0.307535  | 1.494720  | -0.308783 |
| 84  | -0.017733 | 0.043751  | 0.030720  | -0.157348 | -0.064092 | 0.078334  | 0.070661  | -0.156475 | 0.908364  | -0.707543 | -0.308783 | 2.874810  |
| 85  | -0.154629 | 0.069841  | 0.078088  | -0.059605 | -0.155052 | 0.029600  | 0.043317  | -0.013441 | -0.165797 | 0.174017  | 0.048201  | -1.020250 |
| 86  | 0.164741  | -0.045441 | -0.034664 | 0.078382  | 0.029759  | -0.014793 | -0.013737 | 0.041832  | 0.070157  | -0.046178 | -0.041477 | 0.047129  |
| 87  | 0.041624  | -0.041633 | -0.045695 | 0.070382  | 0.043598  | -0.014027 | -0.014925 | 0.029204  | 0.078643  | -0.035672 | -0.046203 | 0.171456  |
| 88  | -0.998345 | 0.042398  | 0.166422  | -0.157175 | -0.014716 | 0.043218  | 0.029151  | -0.152710 | -0.058637 | 0.078005  | 0.069466  | -0.158596 |
| 89  | -0.053674 | -0.121133 | 0.073121  | 0.292040  | 0.299029  | 0.075315  | -0.122816 | -0.055876 | 0.040264  | -0.022508 | -0.019304 | 0.036852  |
| 90  | 0.035678  | -0.018750 | -0.022070 | 0.040522  | -0.058589 | -0.121134 | 0.076469  | 0.296248  | 0.299613  | 0.074748  | -0.123794 | -0.055529 |
| 91  | 0.037577  | -0.021871 | -0.018137 | 0.035146  | 0.035439  | -0.018431 | -0.021877 | 0.038170  | -0.054526 | -0.123277 | 0.074681  | 0.300236  |
| 92  | 0.295792  | 0.075279  | -0.121534 | -0.054455 | 0.039412  | -0.022801 | -0.018786 | 0.037125  | 0.035660  | -0.018161 | -0.021956 | 0.038348  |
| 93  | 0.205409  | -0.695062 | -0.170742 | 0.372145  | -0.085539 | 0.023294  | 0.018843  | -0.039582 | -0.017001 | 0.007862  | 0.007142  | -0.022760 |
| 94  | 0.091801  | -0.699532 | -0.131156 | 0.330958  | -0.078830 | 0.021852  | 0.015499  | -0.037399 | -0.011914 | 0.007003  | 0.006353  | -0.021004 |
| 95  | 0.329055  | -0.131030 | -0.696699 | 0.094496  | -0.008199 | 0.019472  | 0.021589  | -0.033146 | -0.020358 | 0.006527  | 0.006865  | -0.012811 |
| 96  | 0.369514  | -0.170967 | -0.691762 | 0.207887  | -0.033331 | 0.021109  | 0.023136  | -0.035657 | -0.022193 | 0.007378  | 0.007797  | -0.018073 |
| 97  | -0.035711 | 0.023319  | 0.021058  | -0.031773 | 0.203800  | -0.695152 | -0.172904 | 0.371897  | -0.086464 | 0.023698  | 0.019191  | -0.040199 |
| 98  | -0.033061 | 0.021862  | 0.019343  | -0.006479 | 0.088625  | -0.701479 | -0.133182 | 0.332804  | -0.079902 | 0.022234  | 0.015943  | -0.038087 |
| 99  | -0.037131 | 0.015468  | 0.021570  | -0.079685 | 0.331588  | -0.133408 | -0.701203 | 0.088984  | -0.007756 | 0.020090  | 0.022250  | -0.034199 |
| 100 | -0.039364 | 0.018765  | 0.022972  | -0.086208 | 0.370491  | -0.172672 | -0.695115 | 0.205445  | -0.034000 | 0.021780  | 0.023652  | -0.036631 |
| 101 | -0.017568 | 0.007866  | 0.007367  | -0.022777 | -0.036787 | 0.023791  | 0.021859  | -0.034375 | 0.206773  | -0.696307 | -0.173806 | 0.375626  |
| 102 | -0.012147 | 0.006966  | 0.006507  | -0.021163 | -0.034167 | 0.022171  | 0.020025  | -0.010757 | 0.097442  | -0.697326 | -0.133440 | 0.331098  |
| 103 | -0.020311 | 0.006308  | 0.006926  | -0.012222 | -0.038129 | 0.015940  | 0.022182  | -0.080933 | 0.333752  | -0.133739 | -0.699578 | 0.097131  |
| 104 | -0.022183 | 0.007195  | 0.007842  | -0.017452 | -0.040268 | 0.019262  | 0.023674  | -0.087729 | 0.372361  | -0.173749 | -0.695050 | 0.211705  |
| 105 | -0.086699 | 0.023652  | 0.019179  | -0.040462 | -0.017670 | 0.007908  | 0.007361  | -0.021991 | -0.036618 | 0.024016  | 0.021772  | -0.035274 |
| 106 | -0.078149 | 0.021746  | 0.015492  | -0.037851 | -0.012115 | 0.006854  | 0.006368  | -0.019761 | -0.033680 | 0.022186  | 0.019776  | -0.011827 |
| 107 | -0.007675 | 0.020006  | 0.022109  | -0.033994 | -0.021038 | 0.006654  | 0.007049  | -0.012140 | -0.038220 | 0.016197  | 0.022306  | -0.082479 |
| 108 | -0.033823 | 0.021702  | 0.023620  | -0.036500 | -0.022458 | 0.007373  | 0.007850  | -0.017074 | -0.040298 | 0.019510  | 0.023801  | -0.089194 |
| 109 | -0.079397 | 0.087299  | 0.046141  | -0.083507 | -0.217700 | -0.127269 | 0.034778  | 0.143923  | -0.029633 | 0.012457  | 0.011546  | -0.017322 |
| 110 | 0.133270  | 0.033788  | -0.119524 | -0.208780 | -0.081162 | 0.052009  | 0.088080  | -0.088184 | -0.010375 | 0.010020  | 0.007633  | -0.019520 |
| 111 | -0.019180 | 0.007731  | 0.010063  | -0.010436 | -0.081830 | 0.086411  | 0.047886  | -0.084937 | -0.209017 | -0.118433 | 0.035984  | 0.131179  |
| 112 | -0.016511 | 0.010855  | 0.011944  | -0.029712 | 0.139449  | 0.034696  | -0.124068 | -0.211303 | -0.089407 | 0.043468  | 0.087340  | -0.075748 |
| 113 | -0.025898 | 0.011381  | 0.010155  | -0.015535 | -0.018729 | 0.007703  | 0.010043  | -0.009726 | -0.080118 | 0.087446  | 0.045812  | -0.091996 |
| 114 | -0.011660 | 0.010471  | 0.007991  | -0.019538 | -0.016684 | 0.010650  | 0.011808  | -0.028244 | 0.134311  | 0.035927  | -0.120387 | -0.208324 |
| 115 | -0.214041 | -0.124406 | 0.034376  | 0.139032  | -0.028021 | 0.012301  | 0.010892  | -0.017160 | -0.020101 | 0.008100  | 0.010563  | -0.011516 |
| 116 | -0.081372 | 0.049406  | 0.087208  | -0.085055 | -0.011303 | 0.010427  | 0.007846  | -0.019784 | -0.015524 | 0.010111  | 0.011354  | -0.026934 |
| 117 | 0.004276  | -0.011004 | -0.009853 | 0.004605  | 0.001827  | -0.002520 | -0.004229 | 0.005317  | 0.003493  | 0.008807  | 0.008864  | -0.000873 |
| 118 | 0.002266  | -0.005061 | -0.004212 | -0.000674 | -0.001114 | 0.000169  | -0.000793 | 0.000036  | 0.000898  | 0.005405  | 0.005399  | -0.001773 |
| 119 | 0.002568  | -0.004545 | -0.003686 | -0.000528 | -0.001564 | 0.000427  | -0.000218 | 0.000960  | 0.000521  | -0.000646 | 0.000137  | -0.005130 |
| 120 | 0.001206  | 0.001119  | 0.001269  | 0.000193  | -0.000517 | 0.001571  | 0.001468  | -0.000251 | 0.000179  | 0.000573  | 0.000730  | -0.001011 |
| 121 | -0.000592 | -0.000552 | -0.000656 | 0.000078  | 0.000426  | -0.000955 | -0.000862 | 0.000283  | -0.000083 | -0.000443 | -0.000518 | 0.000610  |
| 122 | -0.000614 | -0.000561 | -0.000607 | -0.000293 | 0.000095  | -0.000622 | -0.000611 | -0.000033 | -0.000105 | -0.000137 | -0.000220 | 0.000421  |
| 123 | 0.001154  | -0.000964 | -0.000811 | -0.000679 | -0.002467 | 0.001269  | 0.000757  | 0.000250  | -0.000001 | 0.002709  | 0.002805  | -0.000396 |
| 124 | 0.000048  | 0.000450  | 0.000371  | 0.000631  | 0.000682  | -0.000472 | -0.000246 | -0.000024 | -0.000267 | -0.001240 | -0.001235 | 0.000072  |
| 125 | -0.001201 | 0.000499  | 0.000424  | 0.000096  | 0.001779  | -0.000782 | -0.000498 | -0.000230 | 0.000283  | -0.001461 | -0.001560 | 0.000295  |
| 126 | 0.002496  | -0.007927 | -0.006693 | -0.002857 | -0.001749 | 0.000948  | -0.000299 | -0.000711 | 0.000337  | 0.002017  | 0.002450  | -0.003632 |
| 127 | 0.002979  | -0.001136 | -0.000987 | 0.000715  | -0.002842 | 0.000992  | 0.000440  | -0.000852 | -0.000746 | 0.001330  | 0.001801  | -0.002895 |
| 128 | -0.000180 | 0.000267  | 0.000232  | -0.000069 | 0.000091  | 0.000073  | 0.000142  | 0.000033  | 0.000095  | -0.000039 | -0.000027 | -0.000091 |

|     |           |           |           |           |           |           |           |           |           |           |           |           |
|-----|-----------|-----------|-----------|-----------|-----------|-----------|-----------|-----------|-----------|-----------|-----------|-----------|
| 129 | -0.000017 | -0.000208 | -0.000230 | -0.000157 | 0.000159  | -0.000204 | -0.000225 | 0.000017  | 0.000230  | -0.000155 | -0.000169 | -0.000011 |
| 130 | -0.000085 | -0.000232 | -0.000234 | 0.000118  | 0.000063  | -0.000205 | -0.000161 | -0.000175 | -0.000100 | -0.000287 | -0.000341 | 0.000286  |
| 131 | -0.000077 | 0.000093  | 0.000023  | -0.000287 | -0.000136 | 0.000074  | 0.000086  | 0.000174  | -0.000072 | 0.000117  | 0.000124  | 0.000024  |
| 132 | 0.000358  | -0.000022 | 0.000046  | 0.000394  | -0.000265 | 0.000197  | 0.000104  | -0.000233 | 0.000002  | 0.000147  | 0.000177  | -0.000062 |
| 133 | 0.000005  | 0.000111  | 0.000170  | 0.000004  | 0.000077  | 0.000076  | 0.000063  | 0.000184  | -0.000157 | 0.000227  | 0.000247  | -0.000150 |
| 134 | -0.047906 | -0.008437 | 0.031514  | 0.036549  | -0.017305 | -0.001328 | -0.001812 | -0.008436 | -0.003207 | 0.003186  | 0.003180  | -0.012280 |
| 135 | -0.015579 | -0.015731 | -0.000096 | 0.017568  | 0.000911  | 0.003403  | 0.000881  | -0.009006 | 0.000540  | -0.000369 | 0.000773  | 0.000264  |
| 136 | 0.005086  | 0.010939  | -0.010710 | -0.013731 | 0.006959  | 0.006575  | 0.002375  | -0.012074 | 0.004224  | 0.000582  | -0.001224 | -0.005634 |
| 137 | 0.012139  | -0.007390 | -0.009633 | -0.002440 | -0.003414 | 0.008139  | 0.005090  | -0.017272 | 0.010776  | 0.000625  | -0.003529 | -0.006173 |
| 138 | -0.018245 | -0.014971 | 0.012346  | 0.017903  | 0.015088  | -0.004382 | -0.007650 | 0.002900  | 0.007008  | -0.000799 | -0.003836 | -0.003666 |
| 139 | -0.022636 | 0.010484  | 0.010039  | -0.030376 | 0.110656  | -0.014296 | -0.045200 | 0.039616  | 0.025740  | -0.001949 | -0.008479 | 0.011483  |
| 140 | 0.008732  | -0.005732 | -0.010559 | 0.006563  | 0.001789  | 0.017659  | -0.000700 | -0.025348 | 0.020628  | -0.003191 | -0.007946 | 0.006693  |
| 141 | -0.015272 | 0.006075  | 0.004235  | -0.022124 | 0.021045  | -0.021302 | -0.013632 | 0.024877  | 0.012641  | -0.002075 | -0.005783 | 0.005511  |
| 142 | -0.008453 | 0.005217  | 0.002530  | -0.014211 | 0.005624  | 0.007354  | 0.008359  | -0.006307 | 0.011600  | -0.003023 | -0.002861 | 0.009359  |
| 143 | -0.006367 | 0.004095  | 0.002296  | -0.011886 | 0.040020  | 0.013875  | -0.022140 | -0.052084 | 0.009802  | 0.004240  | 0.002976  | 0.006780  |
| 144 | 0.003134  | 0.004016  | 0.003136  | -0.010274 | -0.005669 | 0.004610  | 0.008029  | -0.006282 | 0.138026  | -0.087748 | -0.055639 | 0.217104  |
| 145 | 0.006808  | 0.000998  | -0.000021 | -0.002595 | 0.010028  | 0.001151  | -0.000673 | 0.018061  | -0.057254 | -0.015124 | 0.025384  | 0.043707  |
| 146 | 0.000962  | 0.000657  | 0.000316  | -0.000915 | 0.002500  | -0.000882 | -0.002357 | -0.007131 | 0.028044  | -0.005275 | -0.004002 | 0.013434  |
| 147 | 0.005877  | -0.000717 | -0.000591 | 0.004133  | 0.001102  | -0.002709 | -0.000496 | 0.010020  | -0.006087 | -0.006624 | -0.011134 | -0.008986 |
| 148 | 0.006336  | -0.001871 | -0.000499 | 0.005680  | 0.008129  | -0.008493 | -0.003626 | 0.033248  | -0.070534 | 0.016372  | 0.027036  | -0.065577 |
| 149 | 0.008161  | 0.006541  | 0.007537  | -0.005579 | -0.014948 | 0.002385  | 0.002572  | -0.006331 | 0.001227  | -0.002753 | -0.000150 | -0.019388 |
| 150 | 0.005026  | -0.001807 | -0.000117 | 0.004056  | 0.000895  | -0.003168 | -0.001993 | 0.006413  | 0.000162  | -0.009955 | -0.002353 | 0.033688  |
| 151 | -0.011124 | -0.004096 | 0.000766  | 0.006544  | -0.002637 | -0.002998 | -0.000757 | 0.007645  | -0.014168 | 0.002519  | 0.007147  | 0.002589  |
| 152 | -0.006631 | -0.004350 | -0.002188 | 0.006582  | -0.005345 | -0.000108 | 0.001327  | 0.000724  | -0.006350 | -0.002138 | 0.004936  | 0.012945  |
| 153 | 0.005374  | -0.002702 | 0.001213  | 0.006826  | -0.003168 | 0.000155  | 0.000553  | 0.000330  | -0.002104 | -0.004038 | 0.000683  | 0.009566  |
| 154 | 0.010531  | -0.000968 | -0.013882 | -0.015584 | 0.004958  | 0.001948  | 0.003465  | -0.006229 | 0.012324  | -0.001310 | -0.005987 | 0.000111  |
| 155 | 0.001057  | 0.004330  | 0.001376  | -0.009905 | 0.026545  | -0.001606 | -0.006697 | 0.005624  | -0.028013 | 0.007708  | 0.010973  | 0.001656  |
| 156 | 0.000845  | -0.000960 | 0.000719  | 0.004217  | 0.001287  | -0.004649 | -0.001377 | 0.012050  | -0.020148 | 0.007102  | 0.005924  | -0.007907 |
| 157 | -0.007659 | -0.008050 | -0.003730 | 0.015004  | -0.002265 | 0.002083  | 0.001274  | -0.005403 | -0.000573 | -0.001957 | 0.000923  | 0.004039  |
| 158 | -0.000838 | 0.000477  | 0.000554  | -0.001823 | -0.000394 | -0.000219 | -0.000264 | 0.000799  | -0.000401 | 0.001041  | 0.001033  | -0.001038 |
| 159 | -0.000225 | -0.001565 | -0.001761 | 0.006418  | -0.001288 | 0.002012  | 0.001492  | 0.000393  | 0.002427  | 0.001877  | 0.002364  | -0.005681 |
| 160 | 0.000099  | -0.001933 | -0.002216 | 0.006473  | -0.000764 | 0.002082  | 0.001677  | -0.000666 | 0.002062  | 0.001078  | 0.001356  | -0.003982 |
| 161 | 0.000693  | -0.001154 | -0.001080 | 0.001788  | 0.000938  | 0.000266  | 0.000315  | -0.000720 | 0.000123  | -0.000470 | -0.000490 | 0.001204  |
| 162 | -0.001157 | -0.003299 | -0.003469 | 0.007972  | -0.007637 | 0.003148  | 0.002905  | 0.002143  | 0.008352  | -0.002170 | -0.001360 | 0.003168  |
| 163 | 0.002530  | -0.004474 | -0.005637 | 0.012943  | 0.004257  | 0.002837  | 0.003490  | -0.007581 | 0.000052  | -0.004288 | -0.005102 | 0.008345  |
| 164 | 0.014973  | 0.004368  | -0.013060 | 0.005975  | -0.008856 | 0.008284  | 0.004633  | -0.021628 | 0.012390  | 0.000089  | -0.003156 | -0.006286 |
| 165 | -0.007955 | -0.022661 | 0.000539  | 0.046774  | -0.023777 | -0.000583 | 0.002444  | -0.004804 | 0.003141  | 0.000318  | -0.000338 | -0.000653 |
| 166 | -0.029653 | -0.006044 | 0.035522  | 0.034681  | -0.012101 | -0.013652 | -0.005711 | 0.022842  | -0.014979 | -0.000629 | 0.005599  | 0.009332  |
| 167 | -0.019674 | 0.007936  | 0.005149  | -0.014172 | -0.022936 | -0.029507 | 0.006329  | 0.036069  | 0.023074  | -0.004611 | -0.010901 | 0.011849  |
| 168 | 0.007882  | -0.003890 | -0.003938 | 0.013644  | -0.039243 | 0.029918  | 0.033505  | -0.032458 | 0.008921  | -0.002803 | -0.002848 | 0.004692  |
| 169 | 0.018518  | -0.010434 | -0.005784 | 0.028692  | -0.017471 | 0.010315  | -0.013209 | -0.036411 | -0.002297 | 0.004377  | 0.004030  | -0.014457 |
| 170 | -0.020060 | -0.005347 | 0.000076  | 0.009892  | -0.028527 | 0.012396  | 0.008011  | -0.060788 | 0.117789  | -0.016425 | -0.019828 | 0.042763  |
| 171 | -0.000731 | -0.001177 | -0.001077 | 0.001812  | -0.004359 | 0.001968  | 0.003803  | 0.009389  | -0.035232 | -0.020586 | 0.000998  | -0.002114 |
| 172 | -0.006617 | -0.001303 | -0.001202 | -0.002754 | -0.004577 | 0.005126  | 0.003212  | -0.003089 | -0.043323 | -0.008724 | 0.027983  | 0.023491  |
| 173 | -0.010683 | -0.004289 | 0.001150  | 0.009440  | -0.007248 | -0.003662 | -0.000037 | 0.008390  | -0.019851 | 0.002535  | 0.012517  | 0.012852  |
| 174 | 0.007518  | 0.001677  | -0.000273 | -0.000105 | -0.002611 | 0.001103  | 0.000848  | -0.003533 | 0.002321  | -0.001460 | 0.001027  | 0.015204  |
| 175 | 0.010737  | 0.008407  | 0.003207  | -0.010739 | 0.007016  | 0.000911  | -0.001463 | -0.004540 | 0.011717  | 0.001794  | -0.006661 | -0.004701 |
| 176 | 0.075277  | -0.005628 | -0.061378 | -0.036317 | -0.009291 | 0.010571  | 0.016861  | -0.017241 | 0.011481  | 0.001463  | -0.002757 | -0.001100 |
| 177 | 0.012731  | -0.001877 | -0.003546 | 0.042376  | -0.046182 | -0.002771 | 0.006004  | 0.011380  | -0.010710 | 0.001433  | 0.006892  | 0.005051  |
| 178 | 0.008213  | 0.001366  | 0.001375  | 0.004778  | 0.049496  | -0.004940 | -0.012905 | -0.006684 | -0.007341 | 0.005623  | 0.013088  | -0.014302 |

|     |           |           |           |           |           |           |           |           |           |           |           |           |
|-----|-----------|-----------|-----------|-----------|-----------|-----------|-----------|-----------|-----------|-----------|-----------|-----------|
| 179 | 0.003682  | -0.003796 | -0.000384 | 0.017577  | -0.010043 | 0.004740  | 0.005721  | 0.008099  | -0.009054 | -0.033707 | -0.005068 | 0.016103  |
| 180 | 0.020829  | -0.002281 | -0.004660 | 0.009069  | -0.004832 | -0.001334 | 0.001159  | 0.009333  | -0.019236 | -0.012612 | 0.002574  | 0.057438  |
| 181 | 0.025943  | -0.003961 | -0.008628 | 0.005384  | -0.001558 | 0.005213  | 0.002447  | -0.013117 | 0.025587  | -0.026091 | -0.011007 | 0.044831  |
| 182 | -0.015248 | -0.000368 | -0.011211 | -0.005489 | -0.000235 | 0.006465  | 0.003465  | -0.016265 | 0.022650  | -0.008358 | -0.008963 | 0.026569  |
| 183 | 0.030127  | 0.028874  | 0.004201  | -0.057647 | 0.000406  | 0.004086  | 0.001796  | -0.012847 | 0.021028  | -0.002631 | -0.007070 | 0.008921  |
| 184 | -0.000887 | -0.001326 | -0.001435 | 0.005323  | -0.002531 | 0.002872  | 0.002291  | -0.000444 | 0.003237  | -0.000477 | -0.000288 | -0.001729 |
| 185 | 0.000107  | -0.001703 | -0.002039 | 0.007991  | -0.001668 | 0.002424  | 0.001712  | 0.001052  | 0.003148  | 0.002682  | 0.003414  | -0.007579 |
| 186 | -0.000508 | 0.000090  | -0.000109 | -0.001156 | 0.000587  | -0.000170 | -0.000064 | -0.000077 | -0.000605 | -0.000245 | -0.000428 | 0.000437  |
| 187 | -0.000349 | 0.003063  | 0.003828  | -0.009643 | -0.000123 | -0.002886 | -0.002352 | 0.000416  | -0.002800 | -0.001329 | -0.001756 | 0.005858  |
| 188 | 0.001643  | -0.000166 | -0.000252 | -0.002817 | 0.003713  | -0.002316 | -0.001673 | -0.000884 | -0.003025 | -0.000597 | -0.000923 | 0.003202  |
| 189 | 0.000145  | 0.000044  | 0.000090  | 0.000144  | 0.000091  | -0.000077 | -0.000096 | 0.000011  | 0.000025  | -0.000028 | -0.000018 | 0.000006  |
| 190 | 0.004306  | 0.000837  | -0.001152 | -0.023573 | 0.003016  | 0.012155  | 0.003657  | -0.014663 | 0.000648  | 0.000501  | 0.000643  | -0.001296 |
| 191 | -0.006012 | 0.000846  | 0.005581  | 0.000761  | -0.007629 | 0.000234  | -0.000291 | 0.001685  | -0.000804 | 0.000248  | 0.000507  | -0.000198 |
| 192 | 0.002668  | -0.000998 | -0.002079 | -0.003759 | 0.002352  | 0.002901  | 0.000854  | -0.003090 | 0.000015  | 0.000035  | -0.000034 | -0.000047 |
| 193 | -0.004744 | 0.001291  | 0.003977  | 0.005371  | -0.008832 | -0.004145 | -0.001638 | 0.005968  | -0.000206 | 0.000049  | 0.000177  | -0.000229 |
| 194 | 0.001803  | -0.001155 | -0.000029 | -0.009117 | 0.004961  | 0.006812  | 0.001899  | -0.008407 | 0.000740  | 0.000247  | 0.000155  | -0.000251 |
| 195 | -0.010190 | 0.004116  | 0.009034  | 0.000670  | -0.024364 | -0.001851 | 0.000985  | 0.005677  | -0.000120 | 0.000508  | 0.000764  | -0.000823 |
| 196 | -0.000075 | 0.000153  | -0.000093 | 0.001674  | -0.003667 | -0.000975 | -0.000518 | 0.001058  | -0.000037 | 0.000017  | 0.000162  | 0.000186  |
| 197 | -0.000365 | 0.000396  | 0.000435  | -0.000922 | -0.000954 | 0.000573  | 0.000217  | -0.000492 | 0.000043  | 0.000066  | 0.000092  | -0.000100 |
| 198 | 0.000084  | 0.000129  | 0.000016  | -0.000353 | -0.000258 | 0.000087  | 0.000215  | 0.000027  | -0.000177 | 0.000089  | 0.000058  | -0.000150 |
| 199 | -0.000418 | 0.000288  | 0.000462  | -0.000827 | -0.001124 | 0.000276  | 0.000307  | -0.000154 | -0.000066 | 0.000090  | 0.000108  | -0.000080 |
| 200 | -0.000200 | -0.000283 | -0.000167 | -0.001374 | 0.000719  | -0.000300 | 0.000056  | 0.000147  | 0.000094  | -0.000110 | -0.000067 | 0.000306  |
| 201 | -0.000850 | 0.000533  | 0.000288  | 0.000930  | -0.013396 | 0.003574  | 0.012014  | 0.001144  | -0.022370 | -0.000827 | 0.000967  | 0.003681  |
| 202 | -0.000034 | 0.000346  | 0.000229  | 0.000084  | 0.002502  | -0.000818 | -0.000401 | -0.008842 | 0.002457  | 0.006024  | 0.001395  | -0.006623 |
| 203 | -0.000367 | 0.000023  | 0.000241  | -0.000302 | -0.003756 | 0.001031  | 0.003095  | 0.003572  | -0.005112 | -0.002014 | -0.001177 | 0.002838  |
| 204 | -0.000104 | 0.000247  | 0.000079  | -0.000772 | 0.004008  | -0.001012 | -0.002862 | -0.005705 | 0.002870  | 0.003185  | 0.000616  | -0.003504 |
| 205 | -0.000071 | 0.000095  | 0.000042  | 0.001607  | -0.006872 | 0.001170  | 0.005764  | 0.002471  | -0.006272 | 0.001070  | -0.000528 | 0.000129  |
| 206 | -0.001410 | 0.000827  | 0.000769  | -0.000581 | 0.004766  | 0.001186  | -0.001502 | -0.022066 | -0.001656 | 0.008160  | 0.003531  | -0.009070 |
| 207 | 0.000233  | 0.000056  | -0.000061 | 0.000340  | -0.000048 | -0.000558 | -0.000231 | -0.002028 | 0.001011  | -0.000065 | 0.000040  | -0.000208 |
| 208 | -0.000099 | 0.000096  | 0.000093  | -0.000053 | -0.000560 | 0.000314  | 0.000596  | -0.000779 | -0.001189 | 0.000347  | 0.000311  | -0.000235 |
| 209 | -0.000122 | 0.000057  | 0.000078  | -0.000125 | 0.000051  | 0.000180  | 0.000068  | -0.000298 | -0.000339 | 0.000067  | 0.000195  | 0.000042  |
| 210 | -0.000131 | 0.000114  | 0.000140  | -0.000113 | -0.000301 | 0.000404  | 0.000399  | -0.000867 | -0.001023 | 0.000430  | 0.000290  | -0.000335 |
| 211 | 0.000248  | -0.000028 | -0.000034 | 0.000087  | 0.000181  | 0.000024  | -0.000345 | 0.000776  | -0.001690 | -0.000182 | -0.000232 | -0.000113 |
| 212 | -0.000639 | 0.000634  | 0.000866  | -0.001200 | -0.001133 | 0.000756  | 0.000647  | -0.000457 | 0.004896  | 0.001315  | -0.001261 | -0.022862 |
| 213 | 0.000576  | 0.000124  | 0.000286  | 0.000441  | 0.000030  | 0.000073  | 0.000053  | 0.001408  | -0.006825 | 0.001287  | 0.005716  | 0.002612  |
| 214 | -0.000044 | 0.000127  | 0.000013  | -0.000443 | -0.000211 | 0.000213  | 0.000097  | -0.000517 | 0.004019  | -0.001051 | -0.002812 | -0.005805 |
| 215 | 0.000227  | -0.000187 | -0.000054 | 0.000095  | -0.000280 | -0.000026 | 0.000140  | -0.000303 | -0.003487 | 0.001038  | 0.002982  | 0.003143  |
| 216 | 0.000620  | 0.000169  | 0.000185  | -0.000254 | 0.000132  | 0.000315  | 0.000158  | 0.000254  | 0.002248  | -0.000766 | -0.000190 | -0.008870 |
| 217 | 0.000243  | 0.000507  | 0.000642  | -0.000789 | -0.001127 | 0.000653  | 0.000489  | 0.000602  | -0.013303 | 0.003425  | 0.011489  | 0.001366  |
| 218 | 0.000288  | -0.000090 | -0.000019 | 0.000207  | 0.000269  | -0.000034 | -0.000074 | 0.000145  | 0.000254  | -0.000053 | -0.000375 | 0.000395  |
| 219 | 0.000011  | 0.000065  | 0.000066  | -0.000086 | -0.000109 | 0.000097  | 0.000125  | -0.000130 | -0.000317 | 0.000418  | 0.000405  | -0.000972 |
| 220 | -0.000156 | 0.000067  | 0.000047  | -0.000098 | -0.000099 | 0.000037  | 0.000066  | -0.000106 | 0.000044  | 0.000210  | 0.000090  | -0.000336 |
| 221 | -0.000003 | 0.000096  | 0.000082  | -0.000107 | -0.000116 | 0.000115  | 0.000115  | -0.000037 | -0.000519 | 0.000283  | 0.000557  | -0.000795 |
| 222 | -0.000015 | -0.000019 | -0.000016 | 0.000085  | 0.000241  | 0.000042  | -0.000067 | 0.000443  | 0.000250  | -0.000508 | -0.000302 | -0.002590 |
| 223 | -0.023436 | -0.001728 | 0.001045  | 0.005560  | -0.000341 | 0.000647  | 0.000851  | -0.001226 | -0.001464 | 0.000938  | 0.000707  | -0.000604 |
| 224 | 0.004882  | 0.006933  | 0.001986  | -0.008456 | 0.000625  | 0.000211  | 0.000162  | -0.000406 | 0.000237  | 0.000221  | 0.000086  | 0.001111  |
| 225 | -0.007418 | -0.003667 | -0.001416 | 0.005084  | -0.000280 | 0.000016  | 0.000132  | -0.000200 | -0.000602 | 0.000135  | 0.000275  | -0.000552 |
| 226 | 0.003843  | 0.003315  | 0.001037  | -0.003758 | -0.000306 | 0.000183  | 0.000033  | -0.000370 | -0.000004 | 0.000068  | -0.000066 | 0.000052  |
| 227 | -0.008530 | -0.000250 | -0.000902 | 0.002323  | 0.000274  | 0.000123  | 0.000350  | 0.000208  | -0.000227 | 0.000169  | 0.000144  | 0.000852  |
| 228 | 0.000390  | 0.010989  | 0.003408  | -0.012353 | 0.000749  | 0.000414  | 0.000594  | -0.001272 | -0.001049 | 0.000731  | 0.000614  | -0.000167 |

|     |           |           |           |           |           |           |           |           |           |           |           |           |
|-----|-----------|-----------|-----------|-----------|-----------|-----------|-----------|-----------|-----------|-----------|-----------|-----------|
| 229 | 0.000850  | -0.000398 | 0.000017  | 0.000235  | 0.000156  | -0.000058 | -0.000018 | 0.000179  | 0.000263  | 0.000071  | -0.000041 | 0.000362  |
| 230 | -0.001113 | 0.000318  | 0.000360  | -0.000163 | -0.000051 | 0.000102  | 0.000093  | -0.000139 | -0.000134 | 0.000120  | 0.000119  | -0.000084 |
| 231 | -0.000237 | 0.000091  | 0.000212  | 0.000021  | -0.000154 | 0.000063  | 0.000036  | -0.000141 | -0.000114 | 0.000049  | 0.000070  | -0.000133 |
| 232 | -0.000881 | 0.000567  | 0.000261  | -0.000520 | 0.000005  | 0.000074  | 0.000074  | -0.000141 | -0.000118 | 0.000077  | 0.000092  | -0.000026 |
| 233 | -0.002702 | -0.000889 | -0.000590 | 0.000765  | 0.000142  | -0.000014 | 0.000076  | 0.000094  | 0.000089  | 0.000018  | -0.000008 | -0.000070 |
| 234 | -0.016054 | 0.005111  | 0.011842  | 0.012567  | -0.030731 | -0.000614 | 0.001387  | 0.005113  | 0.002294  | 0.000617  | 0.000691  | -0.000646 |
| 235 | 0.003689  | 0.000876  | 0.000500  | -0.034155 | 0.023335  | 0.019691  | 0.005304  | -0.027740 | 0.002286  | -0.000156 | 0.000163  | 0.000359  |
| 236 | 0.005208  | -0.002256 | -0.004781 | 0.003050  | 0.003231  | -0.003954 | -0.001113 | 0.004610  | -0.001823 | -0.000072 | -0.000147 | -0.000018 |
| 237 | 0.003753  | -0.001871 | -0.003725 | 0.003098  | 0.000511  | -0.004256 | -0.000784 | 0.006005  | -0.002329 | 0.000053  | -0.000048 | -0.000251 |
| 238 | -0.000191 | 0.000412  | 0.000340  | 0.000736  | 0.000510  | -0.000664 | -0.000832 | 0.000563  | 0.000443  | -0.000039 | 0.000019  | 0.000102  |
| 239 | 0.000511  | 0.000034  | -0.000436 | 0.001660  | 0.001289  | -0.000921 | -0.000910 | 0.000820  | 0.000344  | -0.000122 | -0.000095 | 0.000135  |
| 240 | -0.001785 | 0.000349  | 0.001374  | -0.000679 | 0.001086  | 0.001897  | 0.000474  | -0.002590 | 0.000640  | -0.000059 | -0.000088 | 0.000155  |
| 241 | -0.001740 | 0.000358  | 0.001351  | -0.000525 | 0.000865  | 0.001943  | 0.000455  | -0.002671 | 0.000642  | -0.000050 | -0.000070 | 0.000116  |
| 242 | 0.000655  | -0.000730 | -0.000840 | 0.002011  | 0.000832  | -0.001074 | 0.000071  | 0.001382  | -0.000456 | -0.000041 | -0.000060 | 0.000194  |
| 243 | 0.000361  | -0.000577 | -0.000527 | 0.001263  | -0.000132 | -0.000351 | 0.000393  | 0.000729  | -0.000342 | 0.000034  | 0.000035  | 0.000147  |
| 244 | 0.002402  | -0.000888 | -0.002254 | 0.005460  | -0.000958 | -0.005417 | -0.002087 | 0.006374  | -0.000918 | 0.000009  | -0.000116 | -0.000272 |
| 245 | 0.003093  | -0.000797 | -0.002778 | 0.005721  | -0.000039 | -0.006376 | -0.002378 | 0.007543  | -0.000788 | -0.000173 | -0.000282 | -0.000021 |
| 246 | -0.000466 | 0.000841  | 0.000378  | 0.001717  | 0.002968  | 0.001905  | 0.000327  | -0.025439 | 0.009500  | 0.010411  | 0.004086  | -0.014547 |
| 247 | 0.000279  | 0.000003  | 0.000134  | 0.002818  | -0.021752 | 0.004650  | 0.016648  | 0.013495  | -0.027101 | 0.002107  | 0.002040  | 0.001323  |
| 248 | 0.000009  | -0.000310 | -0.000153 | -0.001154 | 0.004487  | -0.001470 | -0.003446 | 0.002318  | 0.003403  | -0.004295 | -0.001759 | 0.004626  |
| 249 | -0.000355 | -0.000110 | 0.000118  | -0.001856 | 0.004981  | -0.001099 | -0.004003 | 0.001957  | 0.002312  | -0.003463 | -0.001535 | 0.003739  |
| 250 | 0.000141  | 0.000086  | -0.000044 | -0.000085 | 0.000208  | -0.000458 | -0.000475 | 0.001141  | -0.000107 | -0.000128 | 0.000019  | 0.000427  |
| 251 | 0.000158  | 0.000003  | -0.000098 | -0.000146 | 0.000506  | -0.000583 | -0.000783 | 0.002024  | 0.000771  | -0.000868 | -0.000314 | 0.001109  |
| 252 | 0.000212  | -0.000098 | -0.000064 | 0.000753  | -0.002270 | 0.000450  | 0.001699  | 0.000718  | -0.000015 | 0.001583  | 0.000407  | -0.002103 |
| 253 | 0.000228  | -0.000093 | -0.000075 | 0.000761  | -0.002311 | 0.000418  | 0.001733  | 0.000410  | 0.000251  | 0.001595  | 0.000421  | -0.002131 |
| 254 | 0.000040  | -0.000071 | 0.000043  | -0.000362 | 0.001281  | -0.000063 | -0.001081 | 0.000823  | 0.001895  | -0.000750 | -0.000539 | 0.000663  |
| 255 | 0.000001  | 0.000031  | 0.000117  | -0.000231 | 0.000618  | 0.000263  | -0.000362 | -0.000097 | 0.001278  | -0.000444 | -0.000395 | 0.000359  |
| 256 | -0.000269 | -0.000054 | -0.000089 | -0.001196 | 0.005086  | -0.001857 | -0.004660 | 0.000646  | 0.003732  | -0.002636 | -0.001235 | 0.002968  |
| 257 | 0.000023  | -0.000226 | -0.000268 | -0.001025 | 0.006354  | -0.002176 | -0.005700 | 0.001734  | 0.004348  | -0.003043 | -0.001175 | 0.003452  |
| 258 | 0.003320  | -0.000161 | 0.000076  | 0.000542  | 0.000615  | 0.000193  | 0.000170  | 0.001904  | -0.022320 | 0.004859  | 0.016442  | 0.014391  |
| 259 | 0.000334  | 0.000886  | 0.001024  | -0.000264 | -0.000660 | 0.000794  | 0.000504  | 0.001733  | 0.003367  | 0.001887  | 0.000429  | -0.026283 |
| 260 | -0.001462 | -0.000026 | -0.000138 | -0.000124 | -0.000013 | -0.000280 | -0.000263 | -0.000589 | 0.006499  | -0.002341 | -0.005772 | 0.001616  |
| 261 | -0.001386 | 0.000009  | -0.000151 | -0.000410 | -0.000339 | -0.000103 | -0.000087 | -0.000999 | 0.004989  | -0.001830 | -0.004501 | 0.001257  |
| 262 | 0.000025  | -0.000054 | 0.000030  | 0.000065  | 0.000022  | 0.000033  | 0.000066  | -0.000296 | 0.000677  | 0.000293  | -0.000336 | -0.000452 |
| 263 | -0.000020 | -0.000133 | -0.000091 | 0.000074  | 0.000056  | -0.000067 | -0.000001 | -0.000404 | 0.001340  | -0.000014 | -0.001043 | 0.000529  |
| 264 | 0.000747  | -0.000080 | -0.000102 | 0.000339  | 0.000260  | -0.000098 | -0.000069 | 0.000669  | -0.002346 | 0.000478  | 0.001753  | 0.000543  |
| 265 | 0.000766  | -0.000090 | -0.000095 | 0.000351  | 0.000276  | -0.000111 | -0.000074 | 0.000682  | -0.002303 | 0.000481  | 0.001695  | 0.000794  |
| 266 | -0.000072 | -0.000006 | -0.000066 | 0.000008  | 0.000100  | -0.000001 | -0.000063 | -0.000055 | 0.000452  | -0.000640 | -0.000786 | 0.002173  |
| 267 | 0.000027  | 0.000081  | 0.000034  | -0.000031 | 0.000079  | 0.000103  | 0.000005  | -0.000003 | 0.000222  | -0.000528 | -0.000499 | 0.001325  |
| 268 | -0.001213 | -0.000131 | -0.000186 | -0.000465 | -0.000387 | -0.000190 | -0.000035 | -0.001376 | 0.005007  | -0.001283 | -0.003992 | 0.001500  |
| 269 | -0.001068 | -0.000294 | -0.000336 | -0.000088 | -0.000007 | -0.000272 | -0.000153 | -0.001274 | 0.004512  | -0.001371 | -0.003452 | 0.002442  |
| 270 | 0.017897  | 0.017687  | 0.004750  | -0.023903 | 0.002750  | -0.000022 | 0.000219  | 0.000757  | 0.000684  | 0.000089  | -0.000221 | 0.003417  |
| 271 | -0.029227 | 0.000406  | 0.002191  | 0.003423  | 0.001472  | 0.000482  | 0.000636  | -0.000814 | -0.000515 | 0.000699  | 0.000705  | 0.000950  |
| 272 | 0.000451  | -0.006234 | -0.002487 | 0.007245  | -0.000663 | -0.000281 | -0.000324 | -0.000045 | -0.000283 | -0.000074 | 0.000065  | -0.001936 |
| 273 | 0.000002  | -0.005243 | -0.002063 | 0.005930  | -0.001045 | -0.000058 | -0.000120 | -0.000478 | -0.000583 | 0.000022  | 0.000177  | -0.002004 |
| 274 | 0.000538  | -0.000084 | 0.000478  | 0.000277  | -0.000440 | 0.000140  | 0.000098  | 0.000023  | 0.000182  | 0.000017  | -0.000091 | 0.000379  |
| 275 | 0.001656  | -0.000751 | 0.000188  | 0.000847  | -0.000612 | 0.000077  | -0.000004 | 0.000076  | 0.000266  | -0.000126 | -0.000209 | 0.000341  |
| 276 | 0.001018  | 0.002105  | 0.000601  | -0.002917 | 0.000553  | -0.000050 | -0.000076 | 0.000234  | 0.000318  | -0.000162 | -0.000121 | 0.000946  |
| 277 | 0.001142  | 0.002009  | 0.000576  | -0.002749 | 0.000582  | -0.000062 | -0.000084 | 0.000254  | 0.000303  | -0.000144 | -0.000112 | 0.000901  |
| 278 | 0.000822  | -0.001117 | -0.000976 | 0.001028  | 0.000425  | -0.000200 | -0.000147 | 0.000171  | -0.000034 | -0.000013 | 0.000070  | -0.000601 |

|     |           |           |           |           |           |           |           |           |           |           |           |           |
|-----|-----------|-----------|-----------|-----------|-----------|-----------|-----------|-----------|-----------|-----------|-----------|-----------|
| 279 | -0.000017 | -0.000808 | -0.000851 | 0.000780  | 0.000476  | -0.000141 | -0.000055 | 0.000150  | -0.000088 | 0.000086  | 0.000145  | -0.000482 |
| 280 | 0.002149  | -0.004233 | -0.001086 | 0.005580  | -0.002034 | 0.000164  | 0.000018  | -0.000371 | -0.000327 | -0.000082 | -0.000084 | -0.001062 |
| 281 | 0.003394  | -0.003808 | -0.001329 | 0.004572  | -0.001473 | -0.000047 | -0.000159 | 0.000043  | 0.000069  | -0.000309 | -0.000321 | -0.000858 |
| 282 | 0.025042  | -0.005612 | -0.016832 | -0.045841 | 0.049288  | 0.021734  | 0.005112  | -0.031596 | 0.001142  | -0.000202 | -0.000660 | -0.000176 |
| 283 | -0.002115 | 0.000589  | 0.001914  | 0.002799  | -0.001638 | -0.002615 | -0.000618 | 0.003030  | -0.000648 | 0.000191  | 0.000128  | -0.000219 |
| 284 | -0.001061 | 0.000199  | 0.000818  | -0.000600 | -0.000281 | -0.001208 | -0.000315 | 0.001767  | -0.000361 | 0.000091  | 0.000165  | -0.000083 |
| 285 | -0.003261 | 0.000625  | 0.002384  | 0.002684  | -0.003076 | -0.002996 | -0.000540 | 0.004064  | -0.000557 | 0.000118  | 0.000120  | -0.000080 |
| 286 | -0.001319 | 0.000222  | 0.000934  | -0.000082 | 0.000677  | -0.001206 | -0.000081 | 0.001548  | -0.000203 | -0.000031 | -0.000050 | 0.000124  |
| 287 | 0.003062  | -0.000563 | -0.002400 | -0.001465 | 0.002181  | 0.000788  | 0.000784  | -0.000379 | -0.000370 | 0.000080  | 0.000158  | -0.000133 |
| 288 | -0.000058 | -0.000342 | -0.000193 | 0.001106  | -0.027622 | 0.004381  | 0.018977  | 0.045548  | -0.042947 | -0.015105 | -0.004719 | 0.023149  |
| 289 | -0.000123 | 0.000178  | 0.000186  | -0.000720 | 0.003254  | -0.000678 | -0.002688 | -0.002085 | 0.003127  | 0.002302  | 0.000632  | -0.002517 |
| 290 | -0.000072 | 0.000106  | 0.000064  | -0.000189 | 0.001620  | -0.000338 | -0.001133 | -0.000130 | -0.000612 | 0.000739  | 0.000226  | -0.001037 |
| 291 | -0.000001 | 0.000065  | 0.000078  | -0.000472 | 0.003662  | -0.000537 | -0.002744 | -0.002866 | 0.002569  | 0.002376  | 0.000608  | -0.003298 |
| 292 | 0.000075  | -0.000076 | -0.000028 | -0.000281 | 0.001347  | -0.000025 | -0.001127 | 0.000800  | -0.000520 | 0.000710  | 0.000123  | -0.001054 |
| 293 | -0.000039 | -0.000008 | -0.000026 | -0.000068 | -0.001625 | 0.000828  | 0.001494  | 0.002648  | -0.002023 | -0.002557 | -0.000796 | 0.003103  |
| 294 | 0.000390  | -0.000108 | 0.000173  | 0.000737  | -0.000107 | -0.000310 | -0.000100 | 0.001141  | -0.026556 | 0.004183  | 0.017888  | 0.043932  |
| 295 | 0.000414  | -0.000129 | -0.000103 | 0.000128  | -0.000005 | -0.000001 | 0.000009  | 0.000105  | 0.001823  | -0.000927 | -0.001794 | -0.002565 |
| 296 | 0.000353  | -0.000099 | -0.000133 | 0.000046  | 0.000091  | -0.000078 | -0.000026 | -0.000324 | 0.001202  | 0.000046  | -0.000956 | 0.000972  |
| 297 | 0.000344  | -0.000057 | -0.000056 | -0.000039 | 0.000002  | 0.000053  | 0.000072  | -0.000428 | 0.003527  | -0.000518 | -0.002588 | -0.002688 |
| 298 | -0.000088 | 0.000112  | 0.000119  | -0.000173 | -0.000041 | 0.000106  | 0.000056  | -0.000204 | 0.001582  | -0.000392 | -0.001126 | 0.000036  |
| 299 | -0.000201 | 0.000031  | -0.000015 | -0.000044 | 0.000156  | -0.000179 | -0.000201 | 0.000605  | -0.002946 | 0.000660  | 0.002521  | 0.002315  |
| 300 | 0.048137  | 0.020226  | 0.004894  | -0.029704 | 0.000627  | -0.000143 | -0.000426 | -0.000287 | 0.001036  | -0.000082 | -0.000311 | 0.000694  |
| 301 | -0.002275 | -0.001015 | -0.000857 | 0.000657  | 0.000426  | -0.000086 | -0.000123 | 0.000172  | 0.000320  | -0.000240 | -0.000234 | 0.000677  |
| 302 | 0.000687  | -0.001143 | -0.000056 | 0.001422  | -0.000236 | -0.000041 | -0.000079 | 0.000106  | 0.000002  | -0.000103 | -0.000072 | 0.000274  |
| 303 | -0.003323 | -0.002941 | -0.000630 | 0.004012  | -0.000370 | 0.000059  | 0.000050  | -0.000004 | -0.000053 | -0.000029 | -0.000044 | 0.000191  |
| 304 | -0.000431 | -0.001229 | -0.000342 | 0.001745  | -0.000214 | 0.000069  | 0.000126  | -0.000096 | -0.000164 | 0.000143  | 0.000100  | -0.000047 |
| 305 | 0.001732  | 0.002599  | 0.000689  | -0.003122 | 0.000673  | -0.000168 | -0.000146 | 0.000160  | -0.000032 | 0.000011  | 0.000033  | -0.000133 |
| 306 | 0.029558  | 0.001930  | -0.019526 | -0.007552 | -0.032614 | -0.034567 | 0.000305  | 0.050482  | -0.016575 | 0.004408  | 0.004354  | -0.007835 |
| 307 | -0.001255 | 0.000423  | 0.001732  | -0.011162 | 0.012225  | -0.001768 | -0.000174 | 0.001459  | -0.001276 | 0.000285  | -0.000035 | -0.000348 |
| 308 | 0.005079  | -0.001284 | -0.003734 | -0.004902 | 0.004690  | 0.004090  | 0.000861  | -0.005972 | 0.000392  | -0.000040 | 0.000018  | -0.000029 |
| 309 | 0.002463  | -0.000509 | -0.001684 | -0.004013 | 0.004336  | 0.002922  | 0.000508  | -0.003962 | 0.000460  | -0.000126 | -0.000147 | 0.000126  |
| 310 | -0.003080 | 0.000601  | 0.002233  | 0.003838  | -0.004271 | -0.002080 | -0.000437 | 0.003044  | -0.000036 | -0.000004 | -0.000023 | 0.000035  |
| 311 | -0.004216 | 0.001066  | 0.002826  | 0.004221  | -0.005715 | -0.004772 | -0.001252 | 0.006467  | -0.000759 | 0.000216  | 0.000286  | -0.000217 |
| 312 | 0.001205  | -0.000342 | -0.001505 | 0.011654  | -0.010889 | 0.001768  | 0.000527  | -0.001276 | 0.001222  | -0.000333 | -0.000101 | 0.000430  |
| 313 | -0.006615 | 0.003634  | 0.003649  | -0.014109 | 0.042379  | -0.000167 | -0.029406 | -0.028822 | -0.006762 | -0.017498 | 0.001096  | 0.026609  |
| 314 | -0.000187 | 0.000055  | 0.000261  | -0.001465 | 0.001895  | -0.000330 | -0.002237 | 0.011535  | -0.010929 | 0.002003  | 0.000446  | -0.001671 |
| 315 | -0.000018 | 0.000049  | -0.000047 | 0.000554  | -0.005150 | 0.000711  | 0.003651  | 0.004067  | -0.004137 | -0.003281 | -0.001012 | 0.004606  |
| 316 | 0.000059  | -0.000120 | -0.000099 | 0.000427  | -0.003386 | 0.000457  | 0.002529  | 0.003868  | -0.003691 | -0.001601 | -0.000392 | 0.002386  |
| 317 | 0.000049  | -0.000011 | 0.000012  | -0.000152 | 0.002668  | -0.000358 | -0.001860 | -0.003839 | 0.003512  | 0.002018  | 0.000494  | -0.002808 |
| 318 | -0.000196 | 0.000223  | 0.000186  | -0.000610 | 0.005869  | -0.001192 | -0.004354 | -0.005009 | 0.003845  | 0.002587  | 0.000953  | -0.004067 |
| 319 | 0.000290  | -0.000196 | -0.000311 | 0.001249  | -0.002005 | 0.000725  | 0.002345  | -0.010443 | 0.011218  | -0.001792 | -0.000509 | 0.001654  |
| 320 | 0.012981  | -0.003562 | -0.003468 | 0.006155  | 0.006125  | -0.003488 | -0.003599 | 0.013776  | -0.041444 | -0.000754 | 0.027485  | 0.027981  |
| 321 | 0.001163  | -0.000182 | 0.000051  | 0.000145  | -0.000259 | 0.000174  | 0.000329  | -0.001194 | 0.001803  | -0.000760 | -0.002253 | 0.010498  |
| 322 | 0.000066  | -0.000085 | -0.000135 | 0.000205  | 0.000137  | -0.000210 | -0.000162 | 0.000595  | -0.005616 | 0.001228  | 0.004169  | 0.004710  |
| 323 | -0.000284 | 0.000084  | 0.000091  | -0.000006 | -0.000026 | 0.000020  | -0.000014 | 0.000148  | -0.002560 | 0.000295  | 0.001718  | 0.003639  |
| 324 | 0.000011  | 0.000018  | 0.000039  | -0.000079 | -0.000055 | 0.000109  | 0.000102  | -0.000365 | 0.003226  | -0.000436 | -0.002374 | -0.003863 |
| 325 | 0.000634  | -0.000187 | -0.000206 | 0.000049  | 0.000020  | -0.000054 | 0.000049  | -0.000629 | 0.004655  | -0.000520 | -0.003130 | -0.003568 |
| 326 | -0.001586 | 0.000352  | 0.000158  | -0.000314 | 0.000186  | -0.000038 | -0.000303 | 0.001441  | -0.001344 | 0.000173  | 0.001764  | -0.011698 |
| 327 | 0.027643  | 0.031160  | -0.000749 | -0.046060 | 0.016389  | -0.004158 | -0.004089 | 0.007403  | 0.007948  | -0.004224 | -0.004267 | 0.014715  |
| 328 | 0.009573  | -0.002306 | -0.000910 | 0.002014  | -0.000868 | 0.000175  | 0.000025  | -0.000258 | 0.000268  | -0.000006 | -0.000213 | 0.000871  |

|     |           |           |           |           |           |           |           |           |           |           |           |           |
|-----|-----------|-----------|-----------|-----------|-----------|-----------|-----------|-----------|-----------|-----------|-----------|-----------|
| 329 | 0.005813  | 0.004650  | 0.001316  | -0.006347 | 0.000507  | -0.000167 | -0.000228 | 0.000188  | 0.000220  | -0.000187 | -0.000111 | 0.000115  |
| 330 | 0.004499  | 0.002041  | 0.000508  | -0.002993 | -0.000102 | 0.000055  | 0.000076  | -0.000135 | 0.000016  | 0.000090  | 0.000057  | -0.000087 |
| 331 | -0.004482 | -0.002841 | -0.000589 | 0.003902  | -0.000272 | 0.000067  | 0.000093  | -0.000046 | -0.000142 | 0.000071  | 0.000057  | -0.000176 |
| 332 | -0.004862 | -0.003862 | -0.000876 | 0.005698  | -0.000393 | 0.000003  | -0.000079 | 0.000105  | -0.000032 | -0.000149 | -0.000103 | 0.000297  |
| 333 | -0.010763 | 0.002226  | 0.000532  | -0.002136 | 0.001127  | -0.000134 | 0.000111  | 0.000148  | -0.000333 | 0.000180  | 0.000314  | -0.001023 |

|    | 85        | 86        | 87        | 88        | 89        | 90        | 91        | 92        | 93        | 94        | 95        | 96        |
|----|-----------|-----------|-----------|-----------|-----------|-----------|-----------|-----------|-----------|-----------|-----------|-----------|
| 1  | -0.025912 | 0.004574  | 0.005344  | -0.024478 | 0.006937  | 0.004188  | -0.000475 | 0.003035  | 0.000438  | 0.000087  | 0.000765  | 0.000736  |
| 2  | 0.036747  | -0.001586 | 0.001312  | 0.023585  | 0.019220  | 0.017808  | 0.017748  | 0.017970  | 0.007318  | 0.002262  | 0.001788  | 0.006474  |
| 3  | 0.021883  | 0.096752  | -0.072684 | -0.561292 | -0.113233 | -0.005181 | -0.006098 | -0.115167 | -0.130734 | -0.107000 | -0.107093 | -0.130718 |
| 4  | 0.031061  | 0.002444  | 0.002495  | 0.033340  | -0.113577 | -0.115169 | -0.005694 | -0.005675 | -0.048191 | -0.044883 | 0.050633  | 0.023928  |
| 5  | -0.575083 | -0.064477 | 0.104048  | 0.015161  | -0.004572 | -0.107855 | -0.109764 | -0.005532 | -0.004283 | -0.000754 | -0.001181 | -0.004674 |
| 6  | -0.016783 | 0.234797  | 0.241148  | -0.013926 | -0.005825 | -0.003237 | -0.113110 | -0.103875 | 0.019753  | 0.047661  | -0.049304 | -0.053426 |
| 7  | -0.004390 | -0.001890 | -0.001197 | -0.007526 | 0.004858  | 0.005428  | 0.005908  | 0.006286  | -0.003297 | -0.003287 | -0.002357 | -0.002464 |
| 8  | 0.175135  | 0.028327  | -0.135751 | -0.465917 | 0.043570  | 0.001518  | -0.023339 | -0.043312 | -0.304577 | -0.330363 | -0.165404 | -0.212213 |
| 9  | -0.024971 | 0.011560  | 0.018207  | -0.040896 | -0.048279 | -0.022656 | 0.001240  | 0.038032  | -0.210403 | -0.164409 | -0.325987 | -0.299260 |
| 10 | 0.004014  | 0.000081  | -0.001401 | 0.010865  | -0.040227 | 0.035162  | 0.000414  | -0.023903 | -0.011336 | -0.017976 | 0.074936  | 0.056660  |
| 11 | 0.011083  | -0.001249 | 0.000186  | 0.004004  | 0.038242  | -0.039055 | -0.022827 | 0.001539  | -0.006976 | -0.004123 | -0.008107 | -0.009484 |
| 12 | -0.048800 | 0.018588  | 0.012324  | -0.027547 | -0.022740 | -0.042787 | 0.039941  | 0.002222  | -0.000695 | 0.000120  | 0.001042  | -0.000273 |
| 13 | -0.472890 | -0.128323 | 0.033195  | 0.167262  | 0.000420  | 0.038595  | -0.036835 | -0.023480 | -0.001052 | 0.000424  | -0.000508 | -0.001443 |
| 14 | 0.927557  | 0.629580  | 0.371171  | -0.099502 | 0.002820  | -0.021563 | -0.047451 | 0.041233  | -0.010349 | -0.008943 | -0.004677 | -0.007737 |
| 15 | -0.107323 | 0.370235  | 0.632277  | 0.931394  | -0.024956 | 0.001684  | 0.039742  | -0.043323 | 0.059222  | 0.077016  | -0.017523 | -0.010523 |
| 16 | 0.020332  | -0.022172 | -0.010892 | -0.155411 | -0.193223 | 0.000040  | -0.009362 | 0.262610  | -0.106018 | -0.306921 | 0.411894  | 0.402222  |
| 17 | 0.078190  | -0.054212 | -0.059261 | 0.265129  | -0.155637 | -0.021142 | -0.020258 | -0.160325 | 0.218802  | 0.371176  | 0.370234  | 0.218150  |
| 18 | 0.031509  | 0.004196  | -0.012716 | 0.161813  | 0.260082  | -0.008768 | 0.000854  | -0.195388 | 0.406080  | 0.414321  | -0.305601 | -0.102106 |
| 19 | -0.005435 | -0.008676 | -0.008251 | 0.032884  | 0.263911  | -0.197971 | 0.000753  | -0.009349 | 0.011351  | 0.011187  | 0.004979  | 0.006425  |
| 20 | 0.044134  | -0.016351 | -0.016794 | 0.043527  | -0.159558 | -0.158664 | -0.020900 | -0.021696 | 0.028239  | 0.025452  | 0.027986  | 0.030024  |
| 21 | 0.033020  | -0.008266 | -0.008693 | -0.005059 | -0.197781 | 0.266906  | -0.008725 | 0.001150  | -0.000087 | -0.003631 | 0.006023  | 0.007411  |
| 22 | 0.168273  | -0.014410 | 0.002588  | 0.033052  | -0.008530 | 0.266838  | -0.197754 | 0.000513  | 0.005696  | 0.003832  | 0.003485  | 0.005364  |
| 23 | 0.275482  | -0.059855 | -0.055932 | 0.079175  | -0.022705 | -0.161931 | -0.161313 | -0.021069 | 0.008435  | 0.007923  | 0.007940  | 0.008605  |
| 24 | -0.158296 | -0.010556 | -0.022260 | 0.020282  | 0.000400  | -0.198177 | 0.265205  | -0.009572 | 0.004829  | 0.002897  | 0.003255  | 0.005174  |
| 25 | 0.703108  | 0.402409  | -0.818840 | -0.426141 | 0.001150  | -0.009092 | 0.264000  | -0.195262 | 0.006936  | 0.005759  | -0.003944 | -0.000450 |
| 26 | -1.127510 | -0.594091 | -0.594893 | -1.122310 | -0.021844 | -0.022066 | -0.160046 | -0.158346 | 0.030880  | 0.028819  | 0.026006  | 0.028973  |
| 27 | -0.431418 | -0.807775 | 0.413220  | 0.701547  | -0.009741 | 0.000570  | -0.195853 | 0.263279  | 0.006914  | 0.005229  | 0.011389  | 0.011536  |
| 28 | 0.147488  | -0.055803 | -0.061774 | 0.139929  | 0.111606  | -0.045486 | -0.043684 | -0.095077 | 0.056636  | 0.060361  | -0.155901 | -0.106049 |
| 29 | 0.166261  | -0.052339 | -0.064478 | 0.116341  | 0.116202  | -0.096537 | -0.045738 | -0.045629 | 0.115244  | 0.107721  | 0.103025  | 0.110079  |
| 30 | 0.117078  | -0.063677 | -0.053367 | 0.165459  | -0.096036 | 0.117506  | -0.042465 | -0.046144 | 0.030775  | 0.025116  | 0.028741  | 0.033105  |
| 31 | 0.146806  | -0.061407 | -0.055923 | 0.146308  | -0.043332 | 0.118297  | -0.095012 | -0.044325 | 0.029325  | 0.023626  | 0.030061  | 0.033942  |
| 32 | 0.550180  | -0.212247 | -0.225227 | 0.231896  | -0.046644 | -0.097785 | 0.119702  | -0.045978 | 0.033160  | 0.029415  | 0.023343  | 0.029016  |
| 33 | 0.984183  | 0.259662  | -0.121291 | -0.203718 | -0.044728 | -0.046086 | 0.114135  | -0.094894 | 0.032634  | 0.028364  | 0.024371  | 0.030091  |
| 34 | -0.212562 | -0.117315 | 0.267409  | 1.000390  | -0.045025 | -0.045716 | -0.094943 | 0.114895  | 0.112292  | 0.105233  | 0.108534  | 0.116366  |
| 35 | 0.233963  | -0.224067 | -0.214651 | 0.548171  | -0.092889 | -0.045121 | -0.042659 | 0.114531  | -0.107644 | -0.159572 | 0.060117  | 0.056140  |
| 36 | -0.004429 | 0.003003  | 0.003274  | 0.013839  | 0.008722  | 0.001680  | 0.002344  | -0.003268 | 0.063520  | 0.068028  | -0.018090 | -0.013709 |
| 37 | -0.003227 | 0.001516  | 0.002407  | -0.009592 | -0.001817 | 0.002315  | 0.001595  | 0.008896  | -0.013924 | -0.018222 | 0.068501  | 0.062816  |
| 38 | -0.003010 | 0.001350  | 0.001431  | -0.005348 | -0.003636 | 0.008891  | 0.001679  | 0.002528  | -0.001574 | -0.001574 | -0.002020 | -0.001394 |
| 39 | -0.004725 | 0.001291  | 0.001247  | -0.002988 | 0.009304  | -0.002611 | 0.002306  | 0.001709  | -0.000865 | -0.000799 | -0.001298 | -0.001194 |
| 40 | -0.010210 | 0.002550  | 0.001629  | -0.003381 | 0.002207  | -0.002947 | 0.009272  | 0.001651  | -0.000561 | -0.000621 | -0.000647 | -0.000559 |
| 41 | 0.014138  | 0.002997  | 0.002756  | -0.004203 | 0.001656  | 0.009140  | -0.002561 | 0.002241  | -0.000606 | -0.000683 | -0.000637 | -0.000597 |
| 42 | -0.014691 | -0.129985 | 0.032352  | 0.049965  | 0.001552  | 0.002095  | -0.002668 | 0.008952  | -0.001157 | -0.001243 | -0.000702 | -0.000792 |

|    |           |           |           |           |           |           |           |           |           |           |           |           |
|----|-----------|-----------|-----------|-----------|-----------|-----------|-----------|-----------|-----------|-----------|-----------|-----------|
| 43 | 0.052064  | 0.032128  | -0.132148 | -0.017299 | 0.002379  | 0.001659  | 0.009004  | -0.002246 | -0.001266 | -0.001852 | -0.001396 | -0.001410 |
| 44 | 0.010050  | -0.003022 | -0.003540 | 0.014015  | -0.280435 | -0.007027 | -0.005232 | -0.006896 | 0.000691  | -0.001008 | -0.008529 | 0.008799  |
| 45 | 0.013627  | -0.003439 | -0.002962 | 0.009759  | -0.006853 | -0.281094 | -0.006511 | -0.005155 | 0.001493  | 0.001540  | 0.001658  | 0.001717  |
| 46 | 0.017065  | -0.000834 | 0.000495  | -0.017031 | -0.005173 | -0.006719 | -0.279913 | -0.006970 | 0.001628  | 0.001636  | 0.001373  | 0.001381  |
| 47 | -0.019202 | 0.000330  | 0.000892  | 0.020009  | -0.006999 | -0.005344 | -0.006821 | -0.282263 | 0.008418  | -0.012248 | -0.001502 | 0.000243  |
| 48 | 0.002100  | 0.000912  | 0.000712  | 0.003276  | 0.001171  | 0.001184  | 0.000515  | -0.000032 | -0.000815 | -0.000667 | -0.000416 | -0.000533 |
| 49 | -0.000074 | -0.000632 | -0.000363 | -0.001065 | -0.000318 | 0.000456  | 0.000572  | 0.001255  | 0.000988  | 0.000458  | 0.000489  | 0.000867  |
| 50 | -0.005145 | 0.003938  | 0.004211  | -0.005273 | -0.002373 | -0.001177 | -0.001245 | 0.000181  | 0.002699  | 0.002286  | 0.002009  | 0.002179  |
| 51 | 0.002682  | -0.002954 | -0.002342 | 0.001197  | 0.000160  | 0.001134  | 0.000743  | 0.001575  | 0.002320  | 0.001678  | 0.001725  | 0.002423  |
| 52 | -0.000519 | 0.000185  | -0.001078 | 0.006530  | 0.001727  | 0.000690  | 0.000260  | -0.000260 | -0.005247 | -0.004557 | -0.004018 | -0.004895 |
| 53 | -0.000412 | 0.000876  | 0.000904  | -0.000622 | 0.000162  | 0.000424  | 0.000749  | 0.000197  | 0.000009  | -0.000004 | 0.000022  | 0.000021  |
| 54 | 0.000057  | -0.000237 | -0.000199 | 0.000033  | 0.000130  | 0.000120  | 0.000071  | 0.000139  | 0.000271  | 0.000189  | 0.000202  | 0.000271  |
| 55 | -0.000149 | 0.000550  | 0.000478  | 0.000094  | -0.000452 | -0.000147 | -0.000077 | -0.000223 | -0.000532 | -0.000571 | -0.000477 | -0.000546 |
| 56 | -0.000948 | 0.000383  | 0.000583  | -0.001858 | 0.000081  | 0.000285  | 0.000227  | 0.000975  | -0.000274 | -0.000235 | -0.000423 | -0.000319 |
| 57 | 0.000002  | -0.000203 | -0.000169 | 0.000224  | 0.000030  | 0.000077  | 0.000019  | 0.000103  | 0.000064  | 0.000000  | 0.000042  | 0.000075  |
| 58 | 0.000003  | -0.000322 | -0.000300 | 0.000026  | 0.000071  | 0.000095  | 0.000084  | 0.000218  | 0.000141  | 0.000070  | 0.000146  | 0.000129  |
| 59 | 0.000034  | -0.000275 | -0.000275 | -0.000048 | 0.000125  | 0.000131  | 0.000068  | 0.000082  | 0.000159  | 0.000157  | 0.000105  | 0.000197  |
| 60 | 0.001065  | -0.003824 | -0.005894 | 0.017879  | -0.005003 | -0.005616 | -0.000714 | -0.005696 | -0.000311 | 0.000459  | -0.000148 | -0.000634 |
| 61 | 0.014663  | 0.007114  | 0.009239  | -0.028122 | 0.012520  | 0.000087  | 0.001852  | 0.004522  | 0.002151  | 0.001093  | 0.000778  | 0.002358  |
| 62 | 0.029950  | -0.010155 | -0.014673 | 0.030012  | 0.010133  | 0.001138  | 0.005086  | -0.005839 | 0.004408  | 0.003942  | 0.001607  | 0.001725  |
| 63 | -0.024830 | 0.005302  | 0.004621  | 0.002908  | 0.004665  | 0.001171  | 0.016137  | 0.002284  | 0.000594  | -0.000601 | -0.001842 | -0.000455 |
| 64 | -0.002499 | 0.003480  | -0.002424 | -0.011626 | -0.001991 | 0.001462  | 0.017393  | -0.002567 | 0.007318  | 0.006601  | 0.006599  | 0.008411  |
| 65 | 0.012742  | -0.001752 | -0.002198 | -0.002196 | -0.007597 | -0.001106 | -0.011153 | -0.003182 | -0.002072 | -0.000225 | 0.003124  | 0.001369  |
| 66 | -0.009197 | 0.005517  | 0.006922  | -0.005732 | -0.002639 | -0.001294 | -0.012604 | 0.001644  | -0.003743 | -0.003624 | -0.003154 | -0.003325 |
| 67 | -0.025189 | -0.001949 | -0.002890 | 0.005375  | -0.012614 | -0.003320 | -0.003912 | -0.000575 | -0.001764 | -0.001499 | -0.000689 | -0.002001 |
| 68 | -0.010881 | 0.003490  | 0.007795  | -0.019843 | -0.008351 | 0.001440  | -0.007253 | 0.003927  | -0.003480 | -0.003331 | -0.001458 | -0.002295 |
| 69 | 0.199517  | -0.115793 | -0.082289 | 0.306848  | 0.076576  | -0.005809 | -0.060740 | -0.007980 | -0.037904 | -0.025125 | -0.065765 | -0.076491 |
| 70 | 0.315704  | -0.083080 | -0.117921 | 0.196846  | -0.008685 | 0.077631  | -0.008462 | -0.061851 | 0.062162  | 0.052763  | 0.034189  | 0.046965  |
| 71 | -0.139068 | 0.140730  | 0.058835  | -0.373288 | -0.063825 | -0.009905 | 0.073450  | -0.008255 | 0.048974  | 0.035674  | 0.054409  | 0.064370  |
| 72 | -0.378975 | 0.058586  | 0.142188  | -0.132351 | -0.006912 | -0.062280 | -0.007427 | 0.078220  | -0.074213 | -0.064079 | -0.023022 | -0.035399 |
| 73 | -0.154629 | 0.164741  | 0.041624  | -0.998345 | -0.053674 | 0.035678  | 0.037577  | 0.295792  | 0.205409  | 0.091801  | 0.329055  | 0.369514  |
| 74 | 0.069841  | -0.045441 | -0.041633 | 0.042398  | -0.121133 | -0.018750 | -0.021871 | 0.075279  | -0.695062 | -0.699532 | -0.131030 | -0.170967 |
| 75 | 0.078088  | -0.034664 | -0.045695 | 0.166422  | 0.073121  | -0.022070 | -0.018137 | -0.121534 | -0.170742 | -0.131156 | -0.696699 | -0.691762 |
| 76 | -0.059605 | 0.078382  | 0.070382  | -0.157175 | 0.292040  | 0.040522  | 0.035146  | -0.054455 | 0.372145  | 0.330958  | 0.094496  | 0.207887  |
| 77 | -0.155052 | 0.029759  | 0.043598  | -0.014716 | 0.299029  | -0.058589 | 0.035439  | 0.039412  | -0.085539 | -0.078830 | -0.008199 | -0.033331 |
| 78 | 0.029600  | -0.014793 | -0.014027 | 0.043218  | 0.075315  | -0.121134 | -0.018431 | -0.022801 | 0.023294  | 0.021852  | 0.019472  | 0.021109  |
| 79 | 0.043317  | -0.013737 | -0.014925 | 0.029151  | -0.122816 | 0.076469  | -0.021877 | -0.018786 | 0.018843  | 0.015499  | 0.021589  | 0.023136  |
| 80 | -0.013441 | 0.041832  | 0.029204  | -0.152710 | -0.055876 | 0.296248  | 0.038170  | 0.037125  | -0.039582 | -0.037399 | -0.033146 | -0.035657 |
| 81 | -0.165797 | 0.070157  | 0.078643  | -0.058637 | 0.040264  | 0.299613  | -0.054526 | 0.035660  | -0.017001 | -0.011914 | -0.020358 | -0.022193 |
| 82 | 0.174017  | -0.046178 | -0.035672 | 0.078005  | -0.022508 | 0.074748  | -0.123277 | -0.018161 | 0.007862  | 0.007003  | 0.006527  | 0.007378  |
| 83 | 0.048201  | -0.041477 | -0.046203 | 0.069466  | -0.019304 | -0.123794 | 0.074681  | -0.021956 | 0.007142  | 0.006353  | 0.006865  | 0.007797  |
| 84 | -1.020250 | 0.047129  | 0.171456  | -0.158596 | 0.036852  | -0.055529 | 0.300236  | 0.038348  | -0.022760 | -0.021004 | -0.012811 | -0.018073 |
| 85 | 2.890100  | -0.306479 | -0.705921 | 0.922806  | 0.037024  | 0.041026  | 0.291019  | -0.055550 | -0.036255 | -0.033561 | -0.037704 | -0.040019 |
| 86 | -0.306479 | 1.489820  | 0.306083  | -0.694542 | -0.018577 | -0.022181 | 0.074593  | -0.120695 | 0.023520  | 0.021914  | 0.015558  | 0.019010  |
| 87 | -0.705921 | 0.306083  | 1.494890  | -0.296800 | -0.022281 | -0.018446 | -0.122294 | 0.075836  | 0.021734  | 0.019897  | 0.021981  | 0.023636  |
| 88 | 0.922806  | -0.694542 | -0.296800 | 2.866250  | 0.038459  | 0.036797  | -0.053590 | 0.294816  | -0.033692 | -0.008670 | -0.079382 | -0.086609 |
| 89 | 0.037024  | -0.018577 | -0.022281 | 0.038459  | 1.024450  | -0.012623 | -0.003137 | -0.011789 | 0.055313  | 0.065814  | -0.039386 | -0.034058 |
| 90 | 0.041026  | -0.022181 | -0.018446 | 0.036797  | -0.012623 | 1.028750  | -0.013018 | -0.002659 | 0.010884  | 0.007861  | 0.009980  | 0.012148  |
| 91 | 0.291019  | 0.074593  | -0.122294 | -0.053590 | -0.003137 | -0.013018 | 1.029040  | -0.012561 | 0.012041  | 0.009827  | 0.007560  | 0.010552  |
| 92 | -0.055550 | -0.120695 | 0.075836  | 0.294816  | -0.011789 | -0.002659 | -0.012561 | 1.028830  | -0.035000 | -0.040256 | 0.066075  | 0.055485  |



|     |           |           |           |           |           |           |           |           |           |           |           |           |
|-----|-----------|-----------|-----------|-----------|-----------|-----------|-----------|-----------|-----------|-----------|-----------|-----------|
| 93  | -0.036255 | 0.023520  | 0.021734  | -0.033692 | 0.055313  | 0.010884  | 0.012041  | -0.035000 | 0.557122  | 0.137924  | 0.080382  | 0.090420  |
| 94  | -0.033561 | 0.021914  | 0.019897  | -0.008670 | 0.065814  | 0.007861  | 0.009827  | -0.040256 | 0.137924  | 0.561595  | 0.050661  | 0.080557  |
| 95  | -0.037704 | 0.015558  | 0.021981  | -0.079382 | -0.039386 | 0.009980  | 0.007560  | 0.066075  | 0.080382  | 0.050661  | 0.560393  | 0.136321  |
| 96  | -0.040019 | 0.019010  | 0.023636  | -0.086609 | -0.034058 | 0.012148  | 0.010552  | 0.055485  | 0.090420  | 0.080557  | 0.136321  | 0.555514  |
| 97  | -0.017309 | 0.007808  | 0.007416  | -0.022352 | -0.035128 | 0.055104  | 0.010680  | 0.012538  | -0.011989 | -0.011338 | -0.010384 | -0.010779 |
| 98  | -0.012308 | 0.006986  | 0.006615  | -0.020844 | -0.040268 | 0.066073  | 0.007741  | 0.010278  | -0.011335 | -0.010534 | -0.009101 | -0.010354 |
| 99  | -0.020978 | 0.006499  | 0.007065  | -0.012060 | 0.066816  | -0.041702 | 0.009898  | 0.007917  | -0.008650 | -0.006819 | -0.010388 | -0.011232 |
| 100 | -0.022203 | 0.007226  | 0.007854  | -0.017023 | 0.055995  | -0.034900 | 0.012013  | 0.010895  | -0.010129 | -0.008641 | -0.011178 | -0.011873 |
| 101 | -0.091403 | 0.023996  | 0.019712  | -0.040091 | 0.012385  | -0.034996 | 0.056607  | 0.010671  | -0.004103 | -0.003765 | -0.003542 | -0.003827 |
| 102 | -0.082502 | 0.022091  | 0.015956  | -0.037721 | 0.010136  | -0.040054 | 0.066492  | 0.007523  | -0.003743 | -0.003223 | -0.002979 | -0.003544 |
| 103 | -0.010832 | 0.019701  | 0.022160  | -0.033290 | 0.008169  | 0.067203  | -0.040370 | 0.009867  | -0.003420 | -0.002886 | -0.003164 | -0.003714 |
| 104 | -0.037337 | 0.021768  | 0.024026  | -0.036133 | 0.011133  | 0.056621  | -0.034226 | 0.012070  | -0.003727 | -0.003467 | -0.003702 | -0.004087 |
| 105 | 0.207652  | -0.694386 | -0.173041 | 0.369998  | 0.010866  | 0.012266  | -0.034975 | 0.055395  | -0.012196 | -0.011452 | -0.008782 | -0.010342 |
| 106 | 0.098662  | -0.695511 | -0.132940 | 0.324862  | 0.007721  | 0.009919  | -0.039738 | 0.065342  | -0.011301 | -0.010442 | -0.006778 | -0.008670 |
| 107 | 0.334011  | -0.133143 | -0.700782 | 0.090655  | 0.010113  | 0.007791  | 0.066346  | -0.040798 | -0.010668 | -0.009337 | -0.010599 | -0.011475 |
| 108 | 0.371965  | -0.172628 | -0.693998 | 0.205566  | 0.012183  | 0.010699  | 0.055909  | -0.035250 | -0.011096 | -0.010604 | -0.011404 | -0.012173 |
| 109 | -0.021158 | 0.008557  | 0.011034  | -0.013167 | -0.516558 | 0.009715  | 0.001736  | 0.003334  | -0.040747 | -0.046564 | -0.035891 | -0.010153 |
| 110 | -0.015733 | 0.009972  | 0.011207  | -0.025170 | -0.508018 | 0.002932  | 0.001365  | 0.008450  | -0.014536 | -0.019233 | 0.075393  | 0.044341  |
| 111 | -0.027410 | 0.011309  | 0.010150  | -0.015416 | 0.002122  | -0.510226 | 0.009047  | 0.000772  | -0.004774 | -0.002958 | -0.004603 | -0.005512 |
| 112 | -0.013303 | 0.010750  | 0.008281  | -0.020888 | 0.010322  | -0.517744 | 0.003780  | 0.001954  | -0.006015 | -0.004834 | -0.005358 | -0.006597 |
| 113 | -0.199601 | -0.116176 | 0.035995  | 0.127664  | 0.001001  | 0.002273  | -0.511225 | 0.008613  | -0.006340 | -0.005037 | -0.004446 | -0.005664 |
| 114 | -0.091606 | 0.041379  | 0.086304  | -0.073817 | 0.002143  | 0.010744  | -0.518019 | 0.003944  | -0.005683 | -0.004789 | -0.003122 | -0.004885 |
| 115 | -0.081793 | 0.087038  | 0.047470  | -0.082663 | 0.008485  | 0.001082  | 0.003298  | -0.515710 | 0.046072  | 0.078322  | -0.019595 | -0.014769 |
| 116 | 0.137333  | 0.033523  | -0.123540 | -0.212317 | 0.003152  | 0.001670  | 0.009053  | -0.512641 | -0.011169 | -0.038246 | -0.046506 | -0.040729 |
| 117 | -0.001772 | 0.003505  | 0.005581  | -0.008349 | -0.003268 | -0.001972 | 0.000322  | 0.002797  | 0.006159  | 0.004829  | 0.004343  | 0.005400  |
| 118 | -0.003212 | 0.003705  | 0.004452  | -0.006194 | -0.002281 | -0.001122 | -0.000570 | 0.000097  | 0.002669  | 0.002384  | 0.001983  | 0.002173  |
| 119 | -0.004262 | 0.003683  | 0.003834  | -0.006094 | -0.002214 | -0.001680 | -0.001280 | 0.000001  | 0.002425  | 0.002112  | 0.001710  | 0.001924  |
| 120 | -0.001856 | 0.001704  | 0.001506  | -0.000781 | -0.000628 | -0.000511 | -0.000180 | -0.000108 | -0.000637 | -0.000484 | -0.000545 | -0.000744 |
| 121 | 0.001101  | -0.001017 | -0.000907 | 0.000364  | 0.000354  | 0.000320  | 0.000169  | 0.000164  | 0.000329  | 0.000224  | 0.000275  | 0.000393  |
| 122 | 0.000754  | -0.000679 | -0.000591 | 0.000425  | 0.000272  | 0.000193  | 0.000011  | -0.000056 | 0.000304  | 0.000257  | 0.000269  | 0.000346  |
| 123 | -0.000633 | 0.002322  | 0.002386  | -0.001362 | -0.000300 | -0.000502 | -0.000692 | -0.000395 | 0.000428  | 0.000534  | 0.000443  | 0.000335  |
| 124 | 0.000045  | -0.000932 | -0.000920 | 0.000355  | 0.000178  | 0.000254  | 0.000329  | 0.000191  | -0.000167 | -0.000282 | -0.000201 | -0.000160 |
| 125 | 0.000593  | -0.001400 | -0.001475 | 0.000988  | 0.000126  | 0.000247  | 0.000362  | 0.000205  | -0.000253 | -0.000245 | -0.000236 | -0.000165 |
| 126 | -0.003293 | 0.003126  | 0.003645  | -0.004570 | -0.002714 | -0.001439 | -0.001155 | -0.000215 | 0.004148  | 0.003772  | 0.003082  | 0.003549  |
| 127 | -0.002763 | 0.002516  | 0.002818  | -0.004808 | -0.001048 | -0.001154 | -0.001113 | 0.000305  | 0.000608  | 0.000522  | 0.000530  | 0.000411  |
| 128 | -0.000081 | 0.000120  | 0.000073  | 0.000009  | -0.000163 | -0.000073 | -0.000064 | -0.000035 | -0.000132 | -0.000135 | -0.000110 | -0.000122 |
| 129 | 0.000085  | -0.000366 | -0.000334 | 0.000067  | 0.000106  | 0.000033  | 0.000117  | 0.000126  | 0.000136  | 0.000073  | 0.000101  | 0.000137  |
| 130 | 0.000156  | -0.000199 | -0.000185 | 0.000147  | 0.000049  | 0.000186  | 0.000036  | 0.000092  | 0.000127  | 0.000105  | 0.000090  | 0.000145  |
| 131 | -0.000123 | 0.000087  | 0.000119  | 0.000180  | -0.000098 | -0.000024 | -0.000067 | 0.000047  | -0.000036 | -0.000058 | 0.000052  | -0.000075 |
| 132 | -0.000041 | 0.000161  | 0.000159  | -0.000218 | 0.000117  | -0.000066 | -0.000017 | -0.000102 | -0.000006 | 0.000028  | -0.000067 | 0.000014  |
| 133 | -0.000003 | 0.000209  | 0.000179  | -0.000187 | -0.000014 | -0.000061 | -0.000009 | -0.000131 | -0.000095 | -0.000017 | -0.000068 | -0.000104 |
| 134 | 0.015388  | -0.007633 | -0.007209 | 0.025541  | 0.026376  | -0.002925 | -0.002359 | -0.013999 | 0.002004  | 0.006568  | -0.015348 | -0.014580 |
| 135 | 0.005772  | 0.000230  | 0.004027  | 0.010239  | 0.011689  | -0.002216 | 0.004320  | -0.001802 | 0.003558  | 0.012049  | 0.001299  | -0.000059 |
| 136 | 0.010600  | -0.002828 | -0.001006 | 0.014895  | -0.002719 | -0.002171 | -0.001186 | 0.009785  | -0.005807 | -0.004528 | 0.005595  | 0.004161  |
| 137 | 0.012370  | -0.003142 | -0.002333 | 0.013838  | -0.012342 | 0.002286  | -0.000726 | 0.002153  | 0.003826  | 0.003484  | 0.007531  | 0.009240  |
| 138 | 0.011159  | -0.003798 | -0.002951 | 0.015362  | 0.028511  | 0.000816  | -0.001048 | -0.008526 | 0.006172  | 0.008896  | -0.005065 | -0.008844 |
| 139 | -0.011833 | 0.004247  | 0.004190  | -0.007953 | 0.027048  | -0.006647 | -0.001689 | 0.003260  | -0.005772 | -0.004682 | -0.005354 | -0.004750 |
| 140 | 0.003798  | -0.001502 | -0.002528 | 0.000942  | 0.003207  | -0.004001 | -0.002443 | -0.000590 | 0.002775  | 0.002953  | 0.004854  | 0.005330  |
| 141 | -0.002135 | 0.000166  | 0.000531  | 0.002554  | -0.009754 | 0.005401  | -0.001103 | 0.001811  | -0.003593 | -0.002482 | -0.001472 | -0.002834 |
| 142 | -0.006842 | 0.000551  | 0.000204  | -0.003336 | -0.000520 | 0.007456  | -0.001920 | -0.001480 | -0.003224 | -0.001973 | -0.001066 | -0.001467 |

|     |           |           |           |           |           |           |           |           |           |           |           |           |
|-----|-----------|-----------|-----------|-----------|-----------|-----------|-----------|-----------|-----------|-----------|-----------|-----------|
| 143 | -0.007111 | 0.002195  | 0.000257  | -0.005778 | 0.015092  | -0.017940 | 0.002953  | -0.001229 | -0.002560 | -0.001517 | -0.000965 | -0.001151 |
| 144 | -0.050696 | 0.017156  | 0.009708  | -0.036324 | 0.002659  | 0.004358  | 0.039194  | 0.001099  | -0.001877 | -0.002099 | -0.001073 | -0.001637 |
| 145 | -0.006016 | 0.003665  | -0.001196 | -0.013394 | 0.002951  | -0.034158 | 0.020897  | -0.002926 | -0.000688 | -0.000309 | -0.000095 | 0.000032  |
| 146 | -0.000868 | 0.001915  | -0.000359 | -0.004312 | -0.000628 | 0.009275  | 0.003281  | -0.001117 | -0.000320 | -0.000328 | -0.000108 | -0.000091 |
| 147 | -0.004916 | 0.001123  | 0.002531  | -0.006492 | 0.000105  | -0.005018 | -0.013143 | 0.002953  | 0.000832  | -0.000104 | 0.000185  | 0.000571  |
| 148 | 0.030307  | -0.007509 | -0.008870 | 0.007255  | -0.001348 | -0.005948 | -0.010393 | -0.002192 | 0.001651  | 0.000241  | -0.000073 | 0.000818  |
| 149 | 0.134860  | -0.005813 | -0.057498 | 0.026372  | 0.004208  | 0.000306  | 0.034414  | -0.014497 | -0.002441 | -0.004101 | -0.003682 | -0.003481 |
| 150 | -0.027678 | 0.008812  | 0.000163  | -0.004846 | 0.000955  | -0.000996 | 0.013450  | -0.005613 | 0.001667  | 0.000156  | -0.000259 | 0.000587  |
| 151 | -0.015213 | -0.013028 | 0.009028  | 0.033830  | 0.000954  | 0.000466  | -0.012032 | 0.004535  | 0.002198  | 0.001895  | -0.000319 | -0.000235 |
| 152 | -0.007564 | -0.015060 | 0.002971  | 0.029789  | -0.000967 | -0.002480 | 0.001324  | 0.012052  | 0.001804  | 0.002542  | 0.001358  | 0.000815  |
| 153 | 0.006893  | 0.018205  | -0.008080 | -0.036486 | 0.003579  | -0.003310 | 0.016669  | -0.030688 | 0.001357  | 0.001316  | -0.000352 | -0.000949 |
| 154 | 0.006224  | -0.002191 | -0.001768 | 0.005635  | -0.017877 | 0.001358  | -0.001762 | -0.000161 | 0.000839  | 0.000106  | 0.006217  | 0.006882  |
| 155 | -0.008126 | 0.003026  | 0.000070  | -0.013371 | 0.004847  | -0.001862 | 0.005201  | -0.001972 | -0.002521 | -0.001786 | -0.000335 | -0.000881 |
| 156 | -0.014270 | -0.013333 | 0.001387  | 0.016481  | 0.000463  | 0.000006  | -0.021865 | -0.000102 | 0.001023  | -0.000046 | -0.000574 | 0.000118  |
| 157 | -0.000611 | 0.002457  | 0.009084  | 0.010456  | 0.004891  | -0.003153 | 0.006776  | 0.001416  | 0.002646  | 0.005339  | 0.001965  | 0.001394  |
| 158 | -0.000805 | -0.000181 | -0.000265 | 0.000771  | -0.000257 | 0.000136  | -0.000052 | 0.000031  | -0.000309 | -0.000169 | -0.000218 | -0.000330 |
| 159 | 0.000426  | -0.002277 | -0.001986 | -0.002226 | 0.000456  | -0.000414 | -0.000152 | 0.000007  | 0.000774  | 0.000790  | 0.000492  | 0.001216  |
| 160 | 0.000684  | -0.001507 | -0.001252 | -0.002613 | 0.000427  | -0.000140 | -0.000119 | 0.000084  | 0.000969  | 0.000963  | 0.000724  | 0.001434  |
| 161 | 0.000173  | 0.000066  | 0.000207  | -0.000437 | 0.000088  | 0.000142  | -0.000251 | -0.000198 | 0.000583  | 0.000569  | 0.000452  | 0.000629  |
| 162 | -0.002828 | 0.001826  | 0.002432  | -0.008437 | 0.000007  | -0.002458 | 0.000200  | 0.002553  | 0.002051  | 0.001246  | 0.001274  | 0.002165  |
| 163 | 0.002773  | 0.002157  | 0.003161  | -0.006308 | -0.000422 | 0.000690  | -0.000030 | 0.000418  | 0.002542  | 0.001935  | 0.002374  | 0.003210  |
| 164 | 0.018510  | -0.005334 | -0.001534 | 0.019493  | -0.000818 | -0.003445 | -0.002087 | 0.015372  | 0.001127  | -0.005325 | 0.005166  | 0.005369  |
| 165 | -0.001935 | 0.001196  | 0.002088  | 0.003382  | 0.001533  | 0.001341  | 0.001616  | -0.003821 | 0.009386  | 0.013160  | -0.000974 | 0.001784  |
| 166 | -0.021622 | 0.006509  | 0.005616  | -0.017197 | 0.020053  | -0.002025 | 0.003015  | -0.008930 | 0.000015  | 0.006238  | -0.015981 | -0.021570 |
| 167 | -0.004118 | 0.000292  | 0.000795  | 0.001232  | -0.021138 | 0.010532  | -0.003244 | 0.002232  | -0.004819 | -0.003118 | -0.001811 | -0.003424 |
| 168 | 0.001867  | -0.001078 | -0.001274 | 0.000837  | -0.001829 | 0.001115  | -0.002341 | -0.002163 | 0.002022  | 0.001870  | 0.001614  | 0.002197  |
| 169 | 0.009583  | -0.001265 | -0.000550 | 0.004053  | 0.001417  | -0.015589 | 0.002421  | 0.001478  | 0.006253  | 0.004155  | 0.002217  | 0.003515  |
| 170 | 0.025514  | -0.006670 | -0.002761 | 0.035079  | 0.003094  | 0.000474  | 0.004631  | 0.002112  | 0.002327  | 0.002954  | -0.000247 | -0.000517 |
| 171 | 0.000256  | -0.001825 | 0.001076  | 0.004511  | 0.000870  | -0.019745 | -0.002548 | 0.002705  | 0.000588  | 0.000563  | 0.000388  | 0.000435  |
| 172 | 0.002635  | -0.005678 | -0.004664 | 0.017539  | 0.000140  | -0.008730 | 0.021001  | -0.003200 | -0.000037 | 0.001302  | 0.000668  | 0.000062  |
| 173 | -0.022560 | -0.032956 | 0.009369  | 0.049064  | 0.000486  | 0.000097  | -0.017081 | 0.009190  | 0.002435  | 0.001858  | -0.000453 | -0.000422 |
| 174 | -0.013304 | -0.008767 | -0.003002 | -0.003291 | -0.000880 | -0.000285 | 0.000345  | 0.003933  | -0.000789 | -0.000878 | 0.000149  | 0.000110  |
| 175 | -0.010520 | 0.012635  | -0.011570 | -0.029854 | 0.000653  | 0.003798  | -0.003285 | -0.012817 | -0.003573 | -0.004829 | -0.002038 | -0.001135 |
| 176 | -0.003843 | 0.003496  | -0.001925 | -0.029897 | -0.040283 | 0.010566  | -0.000602 | -0.000553 | 0.002582  | 0.003052  | 0.037386  | 0.022485  |
| 177 | -0.014222 | 0.004501  | -0.000135 | -0.033106 | 0.024382  | 0.005006  | 0.002024  | -0.003140 | 0.000360  | 0.001567  | 0.000101  | 0.003514  |
| 178 | -0.017355 | 0.001161  | 0.001481  | -0.014784 | 0.014078  | 0.014778  | -0.000813 | -0.001209 | -0.000582 | -0.000759 | -0.001488 | 0.000316  |
| 179 | -0.013073 | 0.000037  | 0.004368  | 0.001356  | 0.007868  | -0.020290 | -0.005760 | 0.003935  | 0.002561  | 0.001236  | -0.000293 | 0.000675  |
| 180 | -0.075305 | 0.001219  | 0.015284  | -0.014682 | -0.001331 | -0.010584 | -0.026837 | 0.006778  | 0.001778  | 0.000503  | 0.002258  | 0.002388  |
| 181 | -0.001982 | 0.048225  | 0.011832  | -0.072066 | -0.001628 | -0.009783 | 0.036712  | 0.002581  | 0.001306  | 0.002640  | 0.004670  | 0.003678  |
| 182 | -0.017939 | -0.001811 | 0.035996  | 0.058618  | -0.010468 | -0.002546 | 0.009512  | 0.029051  | -0.001813 | 0.002182  | 0.005869  | 0.004851  |
| 183 | 0.024561  | -0.006444 | -0.011542 | -0.017121 | -0.016601 | 0.003736  | 0.002528  | -0.013328 | -0.007535 | -0.021214 | -0.003732 | -0.000561 |
| 184 | 0.002151  | -0.002038 | -0.001510 | -0.003557 | 0.000479  | -0.000200 | -0.000188 | -0.000016 | 0.000649  | 0.000676  | 0.000317  | 0.001059  |
| 185 | -0.000156 | -0.002864 | -0.002520 | -0.003120 | 0.000713  | -0.000606 | -0.000101 | -0.000013 | 0.000886  | 0.000816  | 0.000584  | 0.001391  |
| 186 | 0.000080  | 0.000398  | 0.000364  | 0.000094  | -0.000348 | 0.000170  | -0.000224 | 0.000232  | -0.000017 | -0.000074 | 0.000139  | -0.000029 |
| 187 | -0.000778 | 0.002122  | 0.001651  | 0.004418  | -0.000418 | 0.000296  | 0.000320  | -0.000279 | -0.001672 | -0.001390 | -0.001453 | -0.002295 |
| 188 | -0.001370 | 0.002487  | 0.002135  | 0.002135  | -0.000490 | 0.000339  | 0.000198  | 0.000092  | 0.000176  | -0.000010 | 0.000427  | -0.000132 |
| 189 | -0.000061 | 0.000012  | 0.000020  | -0.000084 | 0.000052  | -0.000002 | 0.000017  | 0.000004  | 0.000002  | -0.000046 | -0.000072 | -0.000017 |
| 190 | -0.000770 | 0.000644  | 0.000403  | 0.000098  | -0.008345 | -0.001455 | -0.000029 | -0.001426 | -0.000524 | -0.000309 | -0.001979 | 0.003135  |
| 191 | -0.000666 | 0.000146  | 0.000164  | 0.000936  | -0.013291 | -0.000257 | -0.000235 | -0.001211 | -0.000627 | -0.000210 | -0.003469 | -0.002068 |
| 192 | -0.000025 | 0.000080  | 0.000025  | -0.000074 | 0.004627  | -0.000109 | 0.000075  | 0.000231  | 0.000461  | 0.000535  | 0.000600  | 0.001461  |

|     |           |           |           |           |           |           |           |           |           |           |           |           |
|-----|-----------|-----------|-----------|-----------|-----------|-----------|-----------|-----------|-----------|-----------|-----------|-----------|
| 193 | -0.000625 | 0.000208  | 0.000290  | -0.000765 | 0.003040  | 0.000183  | 0.000176  | 0.000131  | -0.000753 | -0.000536 | -0.001706 | -0.002246 |
| 194 | 0.000561  | 0.000156  | -0.000142 | 0.001299  | -0.012091 | -0.000539 | -0.000437 | -0.000920 | 0.000289  | 0.000863  | -0.001363 | 0.001338  |
| 195 | -0.001405 | 0.000951  | 0.000824  | -0.001229 | -0.008597 | -0.000907 | 0.000118  | -0.000585 | -0.002053 | -0.002069 | -0.010537 | 0.001476  |
| 196 | 0.000034  | 0.000058  | 0.000030  | -0.000112 | -0.004670 | -0.000328 | -0.000088 | 0.000005  | -0.000079 | -0.000072 | 0.000456  | -0.000343 |
| 197 | -0.000139 | 0.000114  | 0.000123  | -0.000117 | -0.003199 | -0.000033 | -0.000062 | 0.000000  | -0.000237 | -0.000159 | 0.000009  | -0.000438 |
| 198 | -0.000135 | 0.000066  | 0.000083  | -0.000083 | -0.000873 | 0.000155  | 0.000029  | 0.000096  | -0.000097 | -0.000032 | 0.000324  | -0.000339 |
| 199 | -0.000145 | 0.000109  | 0.000103  | -0.000078 | -0.002965 | -0.000004 | -0.000060 | -0.000003 | -0.000212 | -0.000077 | 0.000123  | -0.000588 |
| 200 | 0.000261  | 0.000010  | -0.000077 | 0.000309  | -0.003841 | 0.000024  | -0.000120 | -0.000428 | 0.000132  | 0.000148  | -0.000260 | 0.000390  |
| 201 | 0.000126  | 0.000448  | 0.000566  | -0.000936 | -0.001679 | -0.007629 | -0.001142 | -0.000125 | -0.000261 | -0.000274 | -0.000152 | -0.000158 |
| 202 | 0.000455  | 0.000163  | 0.000224  | -0.000204 | -0.000376 | -0.013135 | -0.000722 | -0.000342 | -0.000183 | -0.000163 | -0.000180 | -0.000050 |
| 203 | 0.000373  | -0.000188 | -0.000043 | 0.000265  | 0.000041  | 0.004194  | -0.000117 | 0.000006  | -0.000011 | -0.000012 | -0.000151 | -0.000089 |
| 204 | -0.000043 | 0.000118  | 0.000008  | -0.000644 | 0.000341  | 0.003568  | -0.000212 | 0.000138  | -0.000118 | -0.000129 | -0.000019 | -0.000058 |
| 205 | 0.000727  | 0.000180  | 0.000302  | 0.000038  | -0.000847 | -0.012706 | -0.000336 | -0.000247 | -0.000051 | -0.000045 | 0.000003  | -0.000027 |
| 206 | -0.000685 | 0.000643  | 0.000921  | -0.001333 | -0.000818 | -0.008268 | -0.000774 | 0.000122  | -0.000420 | -0.000407 | -0.000447 | -0.000320 |
| 207 | 0.000041  | -0.000046 | -0.000016 | 0.000104  | -0.000471 | -0.004323 | -0.000012 | -0.000134 | -0.000020 | -0.000035 | 0.000029  | 0.000033  |
| 208 | 0.000005  | 0.000066  | 0.000062  | -0.000127 | 0.000004  | -0.003031 | -0.000049 | -0.000081 | -0.000051 | -0.000046 | -0.000053 | -0.000040 |
| 209 | -0.000155 | 0.000079  | 0.000049  | -0.000140 | 0.000119  | -0.000935 | 0.000123  | 0.000031  | -0.000025 | -0.000032 | -0.000046 | -0.000032 |
| 210 | 0.000036  | 0.000080  | 0.000072  | -0.000125 | 0.000016  | -0.003152 | -0.000036 | -0.000052 | -0.000061 | -0.000054 | -0.000075 | -0.000065 |
| 211 | 0.000479  | -0.000088 | -0.000015 | 0.000245  | -0.000005 | -0.004410 | -0.000377 | -0.000116 | 0.000012  | 0.000017  | 0.000017  | 0.000017  |
| 212 | -0.001110 | 0.008877  | 0.003675  | -0.009697 | 0.000021  | -0.000955 | -0.007567 | -0.000930 | -0.000321 | -0.000314 | -0.000447 | -0.000427 |
| 213 | -0.006421 | 0.000999  | -0.000388 | 0.000355  | -0.000406 | -0.000917 | -0.012352 | -0.000280 | -0.000011 | -0.000115 | -0.000144 | -0.000138 |
| 214 | 0.003109  | 0.003068  | 0.000669  | -0.003537 | 0.000152  | 0.000344  | 0.003298  | -0.000011 | -0.000037 | -0.000090 | -0.000015 | -0.000001 |
| 215 | -0.004881 | -0.002067 | -0.001258 | 0.002895  | 0.000045  | -0.000022 | 0.004544  | -0.000171 | 0.000089  | 0.000099  | 0.000020  | 0.000041  |
| 216 | 0.002367  | 0.005984  | 0.001264  | -0.006578 | -0.000324 | -0.000444 | -0.013240 | -0.000864 | -0.000083 | -0.000085 | -0.000109 | -0.000084 |
| 217 | -0.022267 | -0.001154 | 0.000951  | 0.003823  | -0.000005 | -0.001466 | -0.007943 | -0.001101 | -0.000219 | -0.000287 | -0.000307 | -0.000320 |
| 218 | -0.001499 | -0.000417 | -0.000340 | 0.000018  | -0.000149 | -0.000121 | -0.003577 | -0.000388 | 0.000052  | 0.000039  | 0.000012  | 0.000007  |
| 219 | -0.001070 | 0.000425  | 0.000249  | -0.000344 | -0.000080 | -0.000003 | -0.002974 | -0.000050 | -0.000021 | -0.000044 | -0.000040 | -0.000027 |
| 220 | -0.000269 | 0.000075  | 0.000185  | 0.000065  | 0.000025  | 0.000126  | -0.000900 | 0.000147  | -0.000027 | -0.000041 | -0.000028 | -0.000018 |
| 221 | -0.001146 | 0.000332  | 0.000312  | -0.000244 | -0.000074 | -0.000008 | -0.003127 | -0.000022 | -0.000039 | -0.000057 | -0.000043 | -0.000040 |
| 222 | 0.001138  | -0.000063 | 0.000149  | -0.000154 | -0.000148 | -0.000544 | -0.004701 | 0.000024  | 0.000008  | 0.000011  | 0.000009  | 0.000003  |
| 223 | -0.010749 | 0.003945  | 0.009435  | 0.000079  | -0.000985 | 0.000177  | -0.000729 | -0.009432 | 0.002650  | -0.000922 | -0.000372 | -0.000625 |
| 224 | 0.002029  | -0.001191 | -0.000284 | -0.009275 | -0.000734 | -0.000416 | -0.000777 | -0.012735 | -0.002957 | -0.003974 | -0.000822 | -0.001158 |
| 225 | -0.004382 | 0.001131  | 0.003821  | 0.004447  | 0.000135  | 0.000122  | 0.000097  | 0.003761  | 0.002299  | 0.001367  | 0.000726  | 0.000700  |
| 226 | 0.003399  | -0.001177 | -0.002408 | -0.005861 | -0.000050 | 0.000110  | -0.000049 | 0.004182  | -0.002472 | -0.000839 | -0.000410 | -0.000592 |
| 227 | -0.007349 | 0.001440  | 0.006387  | 0.002813  | -0.000533 | -0.000392 | -0.000898 | -0.012742 | 0.001715  | -0.001470 | 0.000750  | 0.000118  |
| 228 | 0.003599  | 0.001225  | -0.000860 | -0.022281 | -0.001580 | 0.000000  | -0.000993 | -0.008657 | 0.000998  | -0.011986 | -0.001692 | -0.001680 |
| 229 | -0.000325 | -0.000307 | -0.000073 | -0.001648 | -0.000080 | -0.000127 | -0.000451 | -0.003669 | -0.000065 | 0.000465  | -0.000007 | 0.000006  |
| 230 | -0.000509 | 0.000328  | 0.000536  | -0.000738 | -0.000028 | -0.000049 | 0.000026  | -0.003185 | -0.000375 | 0.000057  | -0.000142 | -0.000213 |
| 231 | 0.000059  | 0.000169  | 0.000069  | -0.000392 | 0.000118  | 0.000023  | 0.000120  | -0.000959 | -0.000379 | 0.000288  | -0.000078 | -0.000130 |
| 232 | -0.000326 | 0.000367  | 0.000427  | -0.001086 | -0.000070 | -0.000080 | -0.000030 | -0.003062 | -0.000661 | 0.000094  | -0.000052 | -0.000215 |
| 233 | -0.000227 | 0.000121  | -0.000040 | 0.001403  | -0.000397 | -0.000114 | 0.000028  | -0.004070 | 0.000779  | 0.000107  | 0.000318  | 0.000252  |
| 234 | -0.000037 | 0.000991  | 0.000557  | 0.000019  | -0.030350 | -0.002034 | -0.001018 | -0.000447 | -0.002709 | -0.002409 | -0.009380 | -0.002421 |
| 235 | 0.000112  | -0.000023 | -0.000021 | 0.003140  | -0.028572 | -0.001801 | -0.000978 | -0.003015 | -0.000620 | -0.000247 | -0.001495 | 0.000953  |
| 236 | -0.000068 | -0.000350 | -0.000240 | -0.000741 | 0.017100  | 0.000898  | 0.000627  | 0.000683  | 0.001269  | 0.000988  | 0.003408  | 0.001365  |
| 237 | -0.000569 | -0.000209 | -0.000068 | -0.000668 | 0.017711  | 0.001316  | 0.000707  | 0.000592  | 0.001060  | 0.000812  | 0.002165  | 0.001566  |
| 238 | 0.000043  | 0.000085  | 0.000098  | -0.000307 | -0.001496 | -0.000089 | -0.000075 | 0.000187  | -0.000216 | -0.000195 | 0.000509  | -0.000833 |
| 239 | 0.000111  | -0.000020 | 0.000004  | -0.000321 | 0.001903  | 0.000018  | 0.000033  | 0.000301  | 0.000003  | -0.000037 | 0.000925  | -0.000471 |
| 240 | 0.000193  | -0.000083 | -0.000076 | 0.000743  | -0.005837 | -0.000266 | -0.000258 | -0.000314 | -0.000252 | -0.000097 | -0.000230 | -0.001143 |
| 241 | 0.000192  | -0.000085 | -0.000080 | 0.000706  | -0.005902 | -0.000306 | -0.000265 | -0.000295 | -0.000267 | -0.000090 | -0.000112 | -0.001230 |
| 242 | 0.000142  | -0.000107 | -0.000111 | 0.000110  | 0.002626  | 0.000311  | 0.000020  | 0.000106  | 0.000407  | 0.000322  | 0.000299  | 0.000527  |

|     |           |           |           |           |           |           |           |           |           |           |           |           |
|-----|-----------|-----------|-----------|-----------|-----------|-----------|-----------|-----------|-----------|-----------|-----------|-----------|
| 243 | 0.000104  | -0.000010 | -0.000042 | 0.000146  | -0.000536 | 0.000149  | -0.000119 | -0.000004 | 0.000282  | 0.000294  | 0.000225  | 0.000284  |
| 244 | -0.000222 | -0.000057 | 0.000050  | -0.001426 | 0.016726  | 0.000904  | 0.000690  | 0.001259  | 0.000482  | 0.000404  | 0.001462  | 0.000790  |
| 245 | -0.000006 | -0.000130 | -0.000069 | -0.001410 | 0.016625  | 0.000898  | 0.000637  | 0.000957  | 0.000549  | 0.000244  | 0.002176  | 0.000593  |
| 246 | 0.000478  | 0.000897  | 0.000967  | -0.001254 | -0.001811 | -0.028951 | -0.000401 | -0.000484 | -0.000414 | -0.000424 | -0.000079 | -0.000276 |
| 247 | 0.002796  | -0.000248 | 0.000069  | 0.001189  | -0.001667 | -0.029159 | -0.002532 | -0.001368 | -0.000035 | 0.000029  | -0.000250 | 0.000085  |
| 248 | -0.001117 | -0.000263 | -0.000298 | 0.000232  | 0.000536  | 0.016246  | 0.000765  | 0.000492  | 0.000162  | 0.000148  | 0.000059  | 0.000084  |
| 249 | -0.001038 | -0.000139 | -0.000171 | -0.000094 | 0.001100  | 0.017343  | 0.000583  | 0.000564  | 0.000058  | 0.000052  | -0.000088 | -0.000038 |
| 250 | 0.000004  | 0.000059  | 0.000014  | -0.000118 | 0.000066  | -0.000810 | -0.000008 | -0.000083 | -0.000045 | -0.000041 | 0.000043  | 0.000003  |
| 251 | -0.000096 | -0.000016 | -0.000084 | -0.000076 | 0.000180  | 0.002466  | 0.000142  | 0.000053  | 0.000003  | -0.000006 | 0.000082  | 0.000019  |
| 252 | 0.000750  | -0.000080 | -0.000093 | 0.000271  | -0.000161 | -0.006114 | -0.000234 | -0.000210 | 0.000049  | 0.000050  | 0.000025  | 0.000043  |
| 253 | 0.000740  | -0.000070 | -0.000098 | 0.000240  | -0.000221 | -0.006095 | -0.000214 | -0.000227 | 0.000047  | 0.000046  | 0.000032  | 0.000046  |
| 254 | 0.000005  | -0.000142 | -0.000078 | 0.000285  | 0.000226  | 0.002337  | 0.000047  | -0.000026 | 0.000033  | 0.000038  | -0.000037 | -0.000009 |
| 255 | 0.000079  | -0.000059 | 0.000031  | 0.000271  | 0.000092  | -0.000891 | -0.000046 | -0.000147 | -0.000026 | -0.000005 | -0.000079 | -0.000042 |
| 256 | -0.001282 | 0.000072  | -0.000113 | -0.000629 | 0.000826  | 0.016872  | 0.001038  | 0.000733  | 0.000040  | 0.000014  | 0.000100  | 0.000000  |
| 257 | -0.001334 | -0.000008 | -0.000145 | -0.000325 | 0.000832  | 0.016757  | 0.000876  | 0.000704  | 0.000128  | 0.000098  | 0.000192  | 0.000083  |
| 258 | -0.026874 | 0.001339  | 0.001168  | 0.001741  | -0.000954 | -0.001219 | -0.029469 | -0.003147 | 0.000039  | 0.000125  | -0.000047 | -0.000013 |
| 259 | 0.008322  | 0.011483  | 0.004892  | -0.015202 | -0.001109 | -0.002266 | -0.028722 | -0.000113 | -0.000371 | -0.000520 | -0.000488 | -0.000563 |
| 260 | 0.004724  | -0.002797 | -0.000872 | 0.003240  | 0.000660  | 0.000776  | 0.017024  | 0.001075  | 0.000017  | 0.000009  | 0.000074  | 0.000067  |
| 261 | 0.004350  | -0.002829 | -0.001077 | 0.003218  | 0.000787  | 0.000895  | 0.016385  | 0.001337  | 0.000019  | -0.000029 | 0.000070  | 0.000083  |
| 262 | 0.000991  | -0.000447 | -0.000537 | 0.000285  | -0.000158 | 0.000032  | -0.000569 | -0.000182 | 0.000014  | 0.000040  | -0.000016 | -0.000013 |
| 263 | 0.001793  | -0.000749 | -0.000673 | 0.000616  | -0.000006 | 0.000209  | 0.002551  | -0.000078 | 0.000049  | 0.000085  | 0.000044  | 0.000048  |
| 264 | 0.000157  | 0.001568  | 0.000443  | -0.001997 | -0.000253 | -0.000200 | -0.006156 | -0.000185 | 0.000049  | 0.000031  | 0.000046  | 0.000052  |
| 265 | -0.000127 | 0.001571  | 0.000418  | -0.002008 | -0.000264 | -0.000165 | -0.006066 | -0.000227 | 0.000049  | 0.000040  | 0.000044  | 0.000047  |
| 266 | 0.000889  | -0.000903 | -0.000255 | 0.001081  | 0.000051  | 0.000156  | 0.002111  | 0.000253  | 0.000012  | -0.000006 | 0.000040  | 0.000027  |
| 267 | -0.000064 | -0.000206 | 0.000061  | 0.000401  | -0.000058 | 0.000055  | -0.001197 | 0.000085  | -0.000027 | -0.000054 | -0.000011 | -0.000023 |
| 268 | 0.002212  | -0.003542 | -0.001625 | 0.003712  | 0.000653  | 0.000953  | 0.017792  | 0.000544  | 0.000040  | 0.000093  | 0.000083  | 0.000107  |
| 269 | 0.003799  | -0.004447 | -0.001935 | 0.004845  | 0.000653  | 0.000776  | 0.016324  | 0.000648  | 0.000110  | 0.000185  | 0.000162  | 0.000181  |
| 270 | 0.002665  | 0.001468  | 0.000935  | -0.030810 | -0.001773 | -0.001225 | -0.003076 | -0.028397 | -0.003810 | -0.013872 | -0.002204 | -0.002582 |
| 271 | -0.016995 | 0.004427  | 0.012102  | 0.013124  | -0.002078 | -0.000896 | -0.000302 | -0.031360 | 0.000329  | -0.000742 | -0.000919 | -0.001329 |
| 272 | 0.003069  | -0.000674 | -0.002572 | 0.005520  | 0.000834  | 0.000727  | 0.001191  | 0.016157  | 0.001975  | 0.004259  | 0.001098  | 0.001431  |
| 273 | 0.003395  | -0.000918 | -0.002765 | 0.003948  | 0.000801  | 0.000760  | 0.001331  | 0.017417  | 0.001992  | 0.003251  | 0.000896  | 0.001200  |
| 274 | 0.000670  | -0.000746 | -0.000740 | 0.000797  | 0.000257  | -0.000071 | -0.000158 | -0.000652 | -0.000875 | 0.000961  | -0.000212 | -0.000246 |
| 275 | 0.001032  | -0.000903 | -0.001046 | 0.001126  | 0.000405  | 0.000016  | -0.000136 | 0.002606  | -0.000566 | 0.001318  | -0.000116 | -0.000065 |
| 276 | -0.001776 | 0.000254  | 0.001316  | -0.000549 | -0.000315 | -0.000358 | -0.000411 | -0.005875 | -0.001320 | -0.000785 | -0.000246 | -0.000401 |
| 277 | -0.001868 | 0.000289  | 0.001387  | -0.000598 | -0.000272 | -0.000324 | -0.000388 | -0.005915 | -0.001408 | -0.000600 | -0.000223 | -0.000391 |
| 278 | 0.000471  | 0.000162  | -0.000371 | 0.002134  | -0.000018 | 0.000072  | 0.000495  | 0.002198  | 0.000839  | 0.000275  | 0.000444  | 0.000547  |
| 279 | -0.000223 | 0.000486  | 0.000365  | 0.001239  | -0.000106 | -0.000047 | 0.000347  | -0.001114 | 0.000555  | 0.000250  | 0.000441  | 0.000423  |
| 280 | 0.004126  | -0.001709 | -0.003722 | 0.001859  | 0.001390  | 0.000749  | 0.000590  | 0.017656  | 0.001228  | 0.003008  | 0.000527  | 0.000595  |
| 281 | 0.005360  | -0.002122 | -0.004843 | 0.002392  | 0.000874  | 0.000596  | 0.000525  | 0.017277  | 0.001072  | 0.002738  | 0.000517  | 0.000823  |
| 282 | 0.001419  | -0.000204 | -0.000593 | 0.001902  | 0.001348  | 0.001362  | -0.000144 | -0.002037 | 0.002729  | 0.002886  | 0.012055  | 0.004807  |
| 283 | 0.000069  | 0.000007  | -0.000065 | 0.000216  | 0.000990  | 0.000265  | 0.000003  | 0.000066  | -0.000227 | -0.000360 | -0.001154 | -0.000734 |
| 284 | -0.000242 | 0.000139  | 0.000114  | -0.000065 | 0.000583  | 0.000030  | -0.000031 | -0.000108 | -0.000154 | -0.000046 | -0.000602 | -0.000217 |
| 285 | -0.000120 | 0.000012  | -0.000004 | 0.000100  | -0.000156 | 0.000137  | 0.000023  | 0.000004  | -0.000365 | -0.000260 | -0.001291 | -0.001099 |
| 286 | 0.000019  | -0.000083 | -0.000032 | 0.000092  | -0.000536 | 0.000209  | 0.000032  | -0.000036 | -0.000157 | -0.000064 | -0.000333 | -0.000600 |
| 287 | -0.000380 | 0.000275  | 0.000314  | -0.001130 | 0.000542  | 0.000275  | 0.000029  | 0.000322  | 0.000245  | 0.000320  | 0.001498  | 0.000919  |
| 288 | 0.001185  | -0.000278 | -0.000028 | 0.000904  | 0.000694  | 0.000546  | -0.001927 | -0.000308 | 0.000073  | 0.000267  | 0.000060  | 0.000118  |
| 289 | 0.000502  | -0.000088 | -0.000039 | 0.000065  | 0.000174  | 0.000679  | -0.000045 | -0.000053 | -0.000110 | -0.000068 | -0.000103 | -0.000084 |
| 290 | -0.000147 | 0.000120  | 0.000132  | -0.000191 | 0.000061  | 0.000447  | -0.000014 | -0.000021 | -0.000045 | -0.000061 | -0.000025 | -0.000041 |
| 291 | 0.000242  | -0.000048 | -0.000047 | -0.000050 | 0.000112  | 0.000071  | -0.000063 | -0.000014 | -0.000032 | -0.000032 | -0.000030 | -0.000047 |
| 292 | 0.000194  | -0.000061 | -0.000105 | 0.000013  | 0.000291  | -0.000295 | -0.000103 | 0.000049  | 0.000048  | 0.000028  | 0.000031  | 0.000000  |

|     |           |           |           |           |           |           |           |           |           |           |           |           |
|-----|-----------|-----------|-----------|-----------|-----------|-----------|-----------|-----------|-----------|-----------|-----------|-----------|
| 293 | -0.000677 | 0.000199  | 0.000163  | -0.000212 | 0.000310  | 0.000682  | 0.000173  | 0.000011  | 0.000020  | -0.000012 | 0.000041  | -0.000014 |
| 294 | -0.041558 | -0.014549 | -0.004126 | 0.022162  | -0.000434 | 0.000544  | 0.000201  | -0.001757 | -0.000027 | 0.000135  | -0.000152 | -0.000007 |
| 295 | 0.001804  | 0.002700  | 0.000941  | -0.003297 | -0.000041 | -0.000330 | -0.000986 | -0.000127 | 0.000032  | 0.000097  | 0.000038  | 0.000063  |
| 296 | -0.000591 | 0.000627  | 0.000007  | -0.000947 | 0.000073  | 0.000323  | -0.000196 | -0.000149 | 0.000066  | 0.000033  | 0.000069  | 0.000066  |
| 297 | 0.002517  | 0.002314  | 0.000548  | -0.003229 | -0.000001 | 0.000136  | 0.000089  | -0.000060 | 0.000046  | 0.000011  | 0.000026  | 0.000028  |
| 298 | -0.000625 | 0.000765  | 0.000240  | -0.001031 | 0.000007  | 0.000078  | 0.000486  | 0.000000  | -0.000033 | -0.000080 | -0.000053 | -0.000067 |
| 299 | -0.003034 | -0.001905 | -0.000650 | 0.002106  | 0.000123  | -0.000072 | -0.000782 | 0.000001  | 0.000022  | -0.000052 | 0.000016  | 0.000000  |
| 300 | 0.026848  | -0.005283 | -0.018110 | -0.046446 | 0.001515  | 0.000173  | -0.001606 | 0.000788  | -0.005589 | -0.014636 | -0.002507 | -0.002400 |
| 301 | -0.003219 | 0.000810  | 0.002636  | 0.001734  | -0.000368 | 0.000007  | -0.000160 | -0.000591 | 0.001033  | -0.000021 | 0.000508  | 0.000317  |
| 302 | -0.001297 | 0.000156  | 0.000868  | -0.000228 | 0.000232  | 0.000022  | -0.000119 | -0.000422 | 0.000193  | 0.000950  | -0.000029 | 0.000104  |
| 303 | -0.003728 | 0.000674  | 0.002681  | 0.003057  | 0.000047  | -0.000010 | -0.000009 | 0.000008  | 0.001114  | 0.001827  | 0.000260  | 0.000376  |
| 304 | -0.001331 | 0.000194  | 0.000974  | -0.000394 | -0.000044 | -0.000068 | -0.000086 | 0.000581  | 0.000616  | 0.000614  | 0.000124  | 0.000202  |
| 305 | 0.001710  | -0.000671 | -0.001715 | -0.002997 | -0.000321 | -0.000067 | -0.000172 | -0.000794 | -0.001117 | -0.001485 | -0.000373 | -0.000337 |
| 306 | -0.008038 | 0.004136  | 0.004203  | -0.015586 | 0.005639  | 0.005877  | 0.003982  | 0.004791  | -0.001019 | -0.000885 | 0.014664  | 0.004910  |
| 307 | 0.000339  | -0.000033 | -0.000261 | 0.001026  | -0.000647 | 0.001118  | 0.000093  | -0.000689 | -0.000260 | -0.000162 | -0.000059 | -0.001667 |
| 308 | 0.000075  | 0.000055  | 0.000004  | 0.000088  | 0.001550  | -0.000054 | -0.000090 | -0.000245 | 0.000644  | 0.000638  | 0.002105  | 0.001636  |
| 309 | 0.000209  | -0.000108 | -0.000099 | 0.000272  | -0.000459 | -0.000126 | -0.000036 | -0.000156 | 0.000239  | 0.000270  | 0.001208  | 0.000474  |
| 310 | -0.000062 | -0.000050 | -0.000011 | 0.000034  | -0.000821 | -0.000032 | 0.000048  | 0.000040  | -0.000313 | -0.000289 | -0.001321 | -0.000924 |
| 311 | -0.000349 | 0.000232  | 0.000162  | -0.000280 | 0.000914  | -0.000039 | 0.000013  | 0.000220  | -0.000501 | -0.000566 | -0.001227 | -0.000604 |
| 312 | -0.000207 | -0.000096 | 0.000203  | -0.001126 | -0.000477 | -0.000858 | -0.000029 | 0.000815  | 0.000213  | 0.000131  | 0.000380  | 0.001131  |
| 313 | -0.012577 | 0.003683  | 0.003568  | -0.006803 | 0.005586  | 0.003878  | 0.004250  | 0.003540  | -0.001818 | -0.001814 | -0.001733 | -0.001854 |
| 314 | 0.001556  | -0.000368 | -0.000180 | 0.000349  | 0.000928  | -0.000048 | -0.001052 | -0.000053 | -0.000072 | 0.000017  | -0.000123 | -0.000137 |
| 315 | -0.000325 | 0.000133  | 0.000161  | -0.000020 | -0.000205 | 0.000933  | -0.000026 | -0.000099 | -0.000039 | -0.000011 | 0.000014  | 0.000026  |
| 316 | 0.000016  | -0.000025 | -0.000056 | 0.000097  | -0.000097 | -0.000546 | -0.000062 | 0.000006  | 0.000065  | 0.000054  | 0.000040  | 0.000061  |
| 317 | 0.000181  | -0.000078 | -0.000084 | 0.000009  | -0.000012 | -0.000548 | -0.000047 | 0.000027  | 0.000006  | 0.000006  | -0.000004 | -0.000007 |
| 318 | -0.000180 | 0.000115  | 0.000189  | -0.000231 | 0.000016  | 0.001052  | 0.000231  | 0.000021  | -0.000107 | -0.000116 | -0.000083 | -0.000103 |
| 319 | -0.001245 | 0.000221  | -0.000029 | -0.000199 | -0.000628 | -0.000788 | 0.000949  | 0.000096  | 0.000147  | 0.000050  | 0.000155  | 0.000160  |
| 320 | 0.007677  | 0.019501  | -0.000958 | -0.029095 | -0.003409 | -0.005275 | -0.004903 | -0.004386 | 0.001772  | 0.001789  | 0.001688  | 0.001711  |
| 321 | -0.010918 | 0.001940  | 0.000637  | -0.001828 | -0.000173 | 0.000645  | 0.000776  | -0.000910 | 0.000083  | 0.000099  | -0.000051 | 0.000002  |
| 322 | -0.003769 | -0.002649 | -0.000965 | 0.003984  | -0.000023 | -0.000042 | -0.001074 | -0.000237 | 0.000024  | 0.000062  | 0.000056  | 0.000082  |
| 323 | -0.003355 | -0.001976 | -0.000404 | 0.002793  | -0.000019 | -0.000026 | 0.000512  | 0.000087  | -0.000047 | -0.000037 | -0.000043 | -0.000047 |
| 324 | 0.003698  | 0.001524  | 0.000365  | -0.002285 | -0.000031 | 0.000095  | 0.000649  | 0.000058  | -0.000002 | -0.000016 | -0.000019 | -0.000022 |
| 325 | 0.003777  | 0.003051  | 0.000751  | -0.004304 | 0.000110  | 0.000274  | -0.000806 | -0.000079 | 0.000102  | 0.000085  | 0.000110  | 0.000098  |
| 326 | 0.010842  | -0.001787 | -0.000356 | 0.001489  | 0.000137  | -0.000950 | -0.000119 | 0.001090  | -0.000159 | -0.000194 | -0.000051 | -0.000112 |
| 327 | -0.035238 | -0.001084 | 0.023075  | 0.013439  | -0.006475 | -0.004074 | -0.004600 | -0.004292 | -0.006763 | -0.024405 | 0.000188  | 0.000178  |
| 328 | -0.002159 | 0.000667  | 0.002058  | -0.010545 | 0.000597  | 0.000030  | -0.000666 | 0.000888  | 0.001394  | 0.000913  | 0.000399  | 0.000490  |
| 329 | 0.005047  | -0.001067 | -0.003327 | -0.004717 | 0.000169  | 0.000074  | -0.000177 | -0.001190 | -0.001742 | -0.002908 | -0.000639 | -0.000657 |
| 330 | 0.003465  | -0.000671 | -0.002516 | -0.004169 | 0.000120  | -0.000023 | -0.000032 | 0.000708  | -0.000426 | -0.001614 | -0.000275 | -0.000236 |
| 331 | -0.002860 | 0.000550  | 0.001942  | 0.004365  | 0.000043  | 0.000008  | 0.000161  | 0.000528  | 0.000985  | 0.001857  | 0.000272  | 0.000321  |
| 332 | -0.005382 | 0.001212  | 0.003900  | 0.005110  | 0.000059  | 0.000039  | 0.000082  | -0.001194 | 0.000403  | 0.003460  | 0.000471  | 0.000433  |
| 333 | 0.001764  | -0.000665 | -0.001971 | 0.010187  | -0.000992 | -0.000129 | 0.000641  | 0.000213  | -0.000596 | -0.001633 | -0.000219 | -0.000341 |

|   | 97        | 98        | 99        | 100       | 101       | 102       | 103       | 104       | 105       | 106       | 107       | 108       |
|---|-----------|-----------|-----------|-----------|-----------|-----------|-----------|-----------|-----------|-----------|-----------|-----------|
| 1 | 0.001113  | 0.001156  | 0.000587  | 0.000822  | -0.003308 | -0.002580 | -0.002020 | -0.003161 | -0.002855 | -0.001823 | -0.002131 | -0.003037 |
| 2 | 0.006069  | 0.001399  | 0.001793  | 0.006738  | 0.002236  | -0.002251 | -0.001278 | 0.003869  | 0.003201  | -0.001602 | -0.002843 | 0.001553  |
| 3 | 0.025269  | 0.052666  | -0.046082 | -0.049082 | -0.003942 | -0.000307 | -0.000001 | -0.003659 | -0.051010 | -0.045906 | 0.050724  | 0.022086  |
| 4 | -0.133189 | -0.109990 | -0.109339 | -0.131440 | 0.021521  | 0.047394  | -0.048391 | -0.052161 | -0.003224 | 0.000763  | 0.000175  | -0.002815 |
| 5 | -0.053335 | -0.049595 | 0.048906  | 0.019214  | -0.132118 | -0.108833 | -0.106437 | -0.128619 | 0.019605  | 0.044826  | -0.050116 | -0.053978 |
| 6 | -0.004315 | -0.001198 | -0.001244 | -0.003961 | -0.056623 | -0.050721 | 0.045719  | 0.016651  | -0.129544 | -0.105234 | -0.110065 | -0.131123 |

|    |           |           |           |           |           |           |           |           |           |           |           |           |
|----|-----------|-----------|-----------|-----------|-----------|-----------|-----------|-----------|-----------|-----------|-----------|-----------|
| 7  | -0.000761 | -0.001194 | -0.002117 | -0.001509 | -0.000847 | -0.001327 | -0.000457 | -0.000117 | 0.001332  | 0.000768  | -0.000064 | 0.000892  |
| 8  | -0.009873 | -0.008602 | -0.004539 | -0.007370 | -0.001037 | 0.000262  | 0.001183  | -0.000348 | -0.011127 | -0.017508 | 0.077762  | 0.058395  |
| 9  | 0.059531  | 0.078239  | -0.018129 | -0.011410 | -0.000117 | 0.000772  | -0.000197 | -0.000764 | -0.007176 | -0.004293 | -0.008504 | -0.009769 |
| 10 | -0.308542 | -0.337490 | -0.163966 | -0.211500 | -0.009673 | -0.007890 | -0.003873 | -0.006911 | -0.000636 | 0.000468  | 0.001387  | 0.000023  |
| 11 | -0.210907 | -0.163774 | -0.337144 | -0.306640 | 0.058758  | 0.074632  | -0.018707 | -0.011815 | 0.000080  | 0.001183  | 0.000214  | -0.000459 |
| 12 | -0.010935 | -0.017884 | 0.078250  | 0.058331  | -0.301068 | -0.320296 | -0.158331 | -0.204214 | -0.010197 | -0.008460 | -0.004662 | -0.007547 |
| 13 | -0.007891 | -0.004752 | -0.009200 | -0.010555 | -0.203364 | -0.160929 | -0.325336 | -0.298329 | 0.056664  | 0.071930  | -0.020220 | -0.013583 |
| 14 | -0.000825 | -0.000133 | 0.000764  | -0.000421 | -0.012967 | -0.018987 | 0.075212  | 0.056827  | -0.305909 | -0.323999 | -0.162052 | -0.208248 |
| 15 | 0.000229  | 0.001496  | 0.000619  | -0.000086 | -0.007051 | -0.004455 | -0.008244 | -0.009617 | -0.206180 | -0.163601 | -0.330983 | -0.301977 |
| 16 | 0.007733  | 0.006615  | -0.003212 | 0.000276  | 0.005269  | 0.003408  | 0.003157  | 0.005056  | 0.011101  | 0.010947  | 0.004766  | 0.006277  |
| 17 | 0.030248  | 0.028151  | 0.025508  | 0.028373  | 0.008518  | 0.007941  | 0.007607  | 0.008273  | 0.028708  | 0.025435  | 0.028587  | 0.030746  |
| 18 | 0.006456  | 0.004766  | 0.010931  | 0.011001  | 0.005223  | 0.003298  | 0.003538  | 0.005343  | -0.000332 | -0.003814 | 0.005814  | 0.006876  |
| 19 | -0.107404 | -0.310609 | 0.414261  | 0.403434  | 0.007186  | 0.006078  | -0.003462 | -0.000069 | 0.005282  | 0.003349  | 0.003175  | 0.005122  |
| 20 | 0.222354  | 0.375645  | 0.374319  | 0.220922  | 0.031098  | 0.028977  | 0.025809  | 0.028636  | 0.008550  | 0.007744  | 0.008137  | 0.008592  |
| 21 | 0.403852  | 0.414537  | -0.310024 | -0.105267 | 0.006653  | 0.004950  | 0.011440  | 0.011424  | 0.005108  | 0.003215  | 0.003369  | 0.005248  |
| 22 | 0.011166  | 0.011103  | 0.004953  | 0.006565  | -0.102631 | -0.302644 | 0.413575  | 0.403141  | 0.007797  | 0.006533  | -0.002895 | 0.000481  |
| 23 | 0.029194  | 0.026458  | 0.029232  | 0.031128  | 0.217650  | 0.368781  | 0.369209  | 0.216267  | 0.031169  | 0.028805  | 0.026471  | 0.029318  |
| 24 | -0.000595 | -0.004013 | 0.005783  | 0.006760  | 0.405157  | 0.409077  | -0.304798 | -0.099644 | 0.006123  | 0.004535  | 0.010942  | 0.011016  |
| 25 | 0.005126  | 0.003283  | 0.003053  | 0.004993  | 0.011291  | 0.011153  | 0.004682  | 0.006396  | -0.102354 | -0.300435 | 0.415631  | 0.403870  |
| 26 | 0.008536  | 0.007993  | 0.007957  | 0.008409  | 0.029551  | 0.026308  | 0.028955  | 0.031351  | 0.221436  | 0.372557  | 0.374228  | 0.220771  |
| 27 | 0.005485  | 0.003522  | 0.003863  | 0.005734  | 0.000843  | -0.002723 | 0.006810  | 0.008067  | 0.402232  | 0.405988  | -0.311109 | -0.102791 |
| 28 | 0.111273  | 0.103819  | 0.108681  | 0.116137  | 0.034328  | 0.030196  | 0.023690  | 0.029406  | 0.031009  | 0.024817  | 0.028738  | 0.032969  |
| 29 | -0.108211 | -0.162733 | 0.060933  | 0.057064  | 0.033697  | 0.029664  | 0.025515  | 0.031075  | 0.029055  | 0.023168  | 0.030407  | 0.034055  |
| 30 | 0.056410  | 0.060772  | -0.161093 | -0.107094 | 0.112727  | 0.105345  | 0.109877  | 0.117273  | 0.034006  | 0.029675  | 0.023851  | 0.029371  |
| 31 | 0.116019  | 0.108621  | 0.104658  | 0.111205  | -0.106626 | -0.154452 | 0.063980  | 0.060057  | 0.032965  | 0.028439  | 0.025232  | 0.030680  |
| 32 | 0.029899  | 0.024550  | 0.028553  | 0.032468  | 0.060369  | 0.062531  | -0.155890 | -0.103914 | 0.110188  | 0.102355  | 0.108430  | 0.115907  |
| 33 | 0.028662  | 0.023077  | 0.029648  | 0.033171  | 0.118445  | 0.109997  | 0.105086  | 0.112703  | -0.106837 | -0.153133 | 0.062722  | 0.058669  |
| 34 | 0.034505  | 0.030666  | 0.023739  | 0.029389  | 0.031151  | 0.024891  | 0.028875  | 0.033492  | 0.057633  | 0.059972  | -0.160723 | -0.107324 |
| 35 | 0.033399  | 0.029015  | 0.025349  | 0.031003  | 0.029786  | 0.024288  | 0.030107  | 0.033963  | 0.116174  | 0.107689  | 0.103967  | 0.110973  |
| 36 | -0.001099 | -0.001217 | -0.000714 | -0.000793 | -0.000614 | -0.000656 | -0.000727 | -0.000632 | -0.001512 | -0.001489 | -0.001928 | -0.001351 |
| 37 | -0.001180 | -0.001829 | -0.001313 | -0.001314 | -0.000570 | -0.000644 | -0.000625 | -0.000563 | -0.000794 | -0.000717 | -0.001249 | -0.001163 |
| 38 | 0.062939  | 0.069641  | -0.018309 | -0.013846 | -0.001143 | -0.001220 | -0.000747 | -0.000816 | -0.000646 | -0.000701 | -0.000757 | -0.000675 |
| 39 | -0.013884 | -0.018308 | 0.069672  | 0.063110  | -0.001218 | -0.001779 | -0.001383 | -0.001379 | -0.000598 | -0.000694 | -0.000638 | -0.000604 |
| 40 | -0.001270 | -0.001253 | -0.001745 | -0.001131 | 0.062219  | 0.068731  | -0.018293 | -0.013737 | -0.001228 | -0.001320 | -0.000767 | -0.000861 |
| 41 | -0.000860 | -0.000771 | -0.001297 | -0.001214 | -0.013601 | -0.018197 | 0.068088  | 0.063615  | -0.001222 | -0.001779 | -0.001366 | -0.001377 |
| 42 | -0.000536 | -0.000590 | -0.000631 | -0.000553 | -0.001278 | -0.001280 | -0.001753 | -0.001155 | 0.062227  | 0.067778  | -0.018464 | -0.013910 |
| 43 | -0.000585 | -0.000683 | -0.000644 | -0.000595 | -0.000882 | -0.000814 | -0.001321 | -0.001240 | -0.013808 | -0.018340 | 0.069536  | 0.062648  |
| 44 | 0.008424  | -0.013994 | -0.001586 | 0.000205  | 0.001843  | 0.001813  | 0.001617  | 0.001632  | 0.001492  | 0.001512  | 0.001763  | 0.001776  |
| 45 | 0.000283  | -0.001560 | -0.010857 | 0.007340  | 0.009432  | -0.008763 | -0.001246 | 0.000453  | 0.001704  | 0.001728  | 0.001477  | 0.001463  |
| 46 | 0.001310  | 0.001380  | 0.001526  | 0.001532  | 0.000193  | -0.001520 | -0.010460 | 0.007617  | 0.009498  | -0.008650 | -0.001145 | 0.000625  |
| 47 | 0.001778  | 0.001757  | 0.001552  | 0.001555  | 0.001639  | 0.001690  | 0.001879  | 0.001895  | 0.000729  | -0.001050 | -0.009059 | 0.008218  |
| 48 | -0.000363 | -0.000496 | -0.000487 | -0.000484 | -0.001661 | -0.001734 | -0.001220 | -0.001514 | -0.000498 | -0.000351 | -0.000484 | -0.000340 |
| 49 | 0.000730  | 0.000589  | 0.000315  | 0.000824  | 0.000945  | 0.000643  | 0.000674  | 0.001028  | 0.000454  | 0.000170  | 0.000072  | 0.000302  |
| 50 | -0.001178 | -0.000473 | -0.000069 | -0.000490 | -0.000643 | -0.000266 | -0.000434 | -0.000855 | -0.002364 | -0.001615 | -0.001768 | -0.002365 |
| 51 | 0.001402  | 0.000745  | 0.000948  | 0.001350  | 0.000763  | 0.000240  | 0.000490  | 0.000895  | 0.001738  | 0.001201  | 0.000800  | 0.001558  |
| 52 | -0.002642 | -0.002192 | -0.002754 | -0.003062 | 0.001581  | 0.001273  | 0.001303  | 0.001536  | -0.000090 | -0.000027 | 0.000493  | 0.000463  |
| 53 | -0.000082 | -0.000089 | -0.000130 | -0.000114 | 0.000031  | 0.000066  | -0.000010 | 0.000085  | -0.000500 | -0.000387 | -0.000404 | -0.000474 |
| 54 | 0.000121  | 0.000078  | 0.000051  | 0.000126  | 0.000129  | 0.000052  | 0.000081  | 0.000136  | 0.000146  | 0.000094  | 0.000066  | 0.000127  |
| 55 | -0.000310 | -0.000147 | -0.000343 | -0.000293 | -0.000163 | -0.000123 | -0.000142 | -0.000160 | -0.000274 | -0.000276 | -0.000190 | -0.000285 |
| 56 | -0.000688 | -0.000529 | -0.000466 | -0.000553 | -0.000064 | -0.000076 | -0.000070 | -0.000054 | -0.000203 | -0.000192 | -0.000279 | -0.000290 |

|     |           |           |           |           |           |           |           |           |           |           |           |           |
|-----|-----------|-----------|-----------|-----------|-----------|-----------|-----------|-----------|-----------|-----------|-----------|-----------|
| 57  | 0.000055  | 0.000015  | 0.000030  | 0.000034  | 0.000128  | 0.000110  | 0.000113  | 0.000119  | 0.000102  | 0.000100  | 0.000054  | 0.000115  |
| 58  | 0.000144  | 0.000108  | 0.000103  | 0.000136  | 0.000163  | 0.000132  | 0.000142  | 0.000180  | 0.000180  | 0.000141  | 0.000098  | 0.000202  |
| 59  | 0.000123  | 0.000072  | 0.000083  | 0.000108  | 0.000218  | 0.000144  | 0.000167  | 0.000207  | 0.000162  | 0.000114  | 0.000126  | 0.000147  |
| 60  | -0.000871 | -0.000327 | 0.000337  | -0.000438 | 0.002984  | 0.002344  | 0.001544  | 0.001821  | 0.002078  | 0.001760  | 0.002569  | 0.003270  |
| 61  | -0.001078 | -0.003354 | 0.001058  | 0.000671  | 0.011576  | 0.008277  | 0.009115  | 0.011594  | -0.003523 | -0.004051 | -0.003993 | -0.004478 |
| 62  | 0.003043  | 0.003295  | 0.002095  | 0.003456  | -0.009396 | -0.006947 | -0.012246 | -0.013775 | 0.005826  | 0.004274  | 0.006617  | 0.008234  |
| 63  | 0.000878  | -0.000460 | 0.002908  | 0.002093  | 0.001906  | 0.001871  | -0.000276 | -0.001123 | -0.002945 | -0.002794 | -0.002371 | -0.001437 |
| 64  | 0.004010  | 0.002390  | 0.001041  | 0.002801  | -0.005244 | -0.004347 | -0.007816 | -0.008774 | -0.001965 | -0.001629 | 0.002221  | 0.000390  |
| 65  | 0.003486  | 0.003503  | -0.000370 | 0.000886  | -0.003975 | -0.002946 | -0.002664 | -0.003106 | 0.000798  | 0.001347  | 0.001310  | 0.000162  |
| 66  | -0.002117 | -0.001104 | -0.000693 | -0.002596 | 0.002941  | 0.001998  | 0.005866  | 0.006045  | -0.003314 | -0.002085 | -0.003541 | -0.003566 |
| 67  | 0.001844  | 0.004261  | 0.000342  | 0.001271  | -0.008358 | -0.005963 | -0.007564 | -0.008635 | 0.000786  | 0.001666  | 0.001150  | 0.000886  |
| 68  | -0.003750 | -0.003281 | -0.003583 | -0.004664 | 0.007150  | 0.005676  | 0.010619  | 0.011993  | -0.001674 | -0.001763 | -0.004044 | -0.003933 |
| 69  | -0.076680 | -0.066640 | -0.025600 | -0.038176 | 0.048818  | 0.036098  | 0.054725  | 0.064422  | 0.063266  | 0.052550  | 0.034697  | 0.047525  |
| 70  | -0.035670 | -0.023019 | -0.064257 | -0.074145 | -0.075757 | -0.064901 | -0.023378 | -0.035923 | 0.048108  | 0.035018  | 0.054376  | 0.063498  |
| 71  | 0.065110  | 0.055655  | 0.036029  | 0.049276  | -0.038067 | -0.025573 | -0.066104 | -0.076883 | -0.076029 | -0.064657 | -0.023353 | -0.035572 |
| 72  | 0.047173  | 0.034301  | 0.053411  | 0.062554  | 0.064766  | 0.054235  | 0.035307  | 0.048931  | -0.035632 | -0.022970 | -0.066156 | -0.076005 |
| 73  | -0.035711 | -0.033061 | -0.037131 | -0.039364 | -0.017568 | -0.012147 | -0.020311 | -0.022183 | -0.086699 | -0.078149 | -0.007675 | -0.033823 |
| 74  | 0.023319  | 0.021862  | 0.015468  | 0.018765  | 0.007866  | 0.006966  | 0.006308  | 0.007195  | 0.023652  | 0.021746  | 0.020006  | 0.021702  |
| 75  | 0.021058  | 0.019343  | 0.021570  | 0.022972  | 0.007367  | 0.006507  | 0.006926  | 0.007842  | 0.019179  | 0.015492  | 0.022109  | 0.023620  |
| 76  | -0.031773 | -0.006479 | -0.079685 | -0.086208 | -0.022777 | -0.021163 | -0.012222 | -0.017452 | -0.040462 | -0.037851 | -0.033994 | -0.036500 |
| 77  | 0.203800  | 0.088625  | 0.331588  | 0.370491  | -0.036787 | -0.034167 | -0.038129 | -0.040268 | -0.017670 | -0.012115 | -0.021038 | -0.022458 |
| 78  | -0.695152 | -0.701479 | -0.133408 | -0.172672 | 0.023791  | 0.022171  | 0.015940  | 0.019262  | 0.007908  | 0.006854  | 0.006654  | 0.007373  |
| 79  | -0.172904 | -0.133182 | -0.701203 | -0.695115 | 0.021859  | 0.020025  | 0.022182  | 0.023674  | 0.007361  | 0.006368  | 0.007049  | 0.007850  |
| 80  | 0.371897  | 0.332804  | 0.088984  | 0.205445  | -0.034375 | -0.010757 | -0.080933 | -0.087729 | -0.021991 | -0.019761 | -0.012140 | -0.017074 |
| 81  | -0.086464 | -0.079902 | -0.007756 | -0.034000 | 0.206773  | 0.097442  | 0.333752  | 0.372361  | -0.036618 | -0.033680 | -0.038220 | -0.040298 |
| 82  | 0.023698  | 0.022234  | 0.020090  | 0.021780  | -0.696307 | -0.697326 | -0.133739 | -0.173749 | 0.024016  | 0.022186  | 0.016197  | 0.019510  |
| 83  | 0.019191  | 0.015943  | 0.022250  | 0.023652  | -0.173806 | -0.133440 | -0.699578 | -0.695050 | 0.021772  | 0.019776  | 0.022306  | 0.023801  |
| 84  | -0.040199 | -0.038087 | -0.034199 | -0.036631 | 0.375626  | 0.331098  | 0.097131  | 0.211705  | -0.035274 | -0.011827 | -0.082479 | -0.089194 |
| 85  | -0.017309 | -0.012308 | -0.020978 | -0.022203 | -0.091403 | -0.082502 | -0.010832 | -0.037337 | 0.207652  | 0.098662  | 0.334011  | 0.371965  |
| 86  | 0.007808  | 0.006986  | 0.006499  | 0.007226  | 0.023996  | 0.022091  | 0.019701  | 0.021768  | -0.694386 | -0.695511 | -0.133143 | -0.172628 |
| 87  | 0.007416  | 0.006615  | 0.007065  | 0.007854  | 0.019712  | 0.015956  | 0.022160  | 0.024026  | -0.173041 | -0.132940 | -0.700782 | -0.693998 |
| 88  | -0.022352 | -0.020844 | -0.012060 | -0.017023 | -0.040091 | -0.037721 | -0.033290 | -0.036133 | 0.369998  | 0.324862  | 0.090655  | 0.205566  |
| 89  | -0.035128 | -0.040268 | 0.066816  | 0.055995  | 0.012385  | 0.010136  | 0.008169  | 0.011133  | 0.010866  | 0.007721  | 0.010113  | 0.012183  |
| 90  | 0.055104  | 0.066073  | -0.041702 | -0.034900 | -0.034996 | -0.040054 | 0.067203  | 0.056621  | 0.012266  | 0.009919  | 0.007791  | 0.010699  |
| 91  | 0.010680  | 0.007741  | 0.009898  | 0.012013  | 0.056607  | 0.066492  | -0.040370 | -0.034226 | -0.034975 | -0.039738 | 0.066346  | 0.055909  |
| 92  | 0.012538  | 0.010278  | 0.007917  | 0.010895  | 0.010671  | 0.007523  | 0.009867  | 0.012070  | 0.055395  | 0.065342  | -0.040798 | -0.035250 |
| 93  | -0.011989 | -0.011335 | -0.008650 | -0.010129 | -0.004103 | -0.003743 | -0.003420 | -0.003727 | -0.012196 | -0.011301 | -0.010668 | -0.011096 |
| 94  | -0.011338 | -0.010534 | -0.006819 | -0.008641 | -0.003765 | -0.003223 | -0.002886 | -0.003467 | -0.011452 | -0.010442 | -0.009337 | -0.010604 |
| 95  | -0.010384 | -0.009101 | -0.010388 | -0.011178 | -0.003542 | -0.002979 | -0.003164 | -0.003702 | -0.008782 | -0.006778 | -0.010599 | -0.011404 |
| 96  | -0.010779 | -0.010354 | -0.011232 | -0.011873 | -0.003827 | -0.003544 | -0.003714 | -0.004087 | -0.010342 | -0.008670 | -0.011475 | -0.012173 |
| 97  | 0.557112  | 0.138128  | 0.081601  | 0.091337  | -0.012230 | -0.011476 | -0.008857 | -0.010345 | -0.004117 | -0.003676 | -0.003597 | -0.003813 |
| 98  | 0.138128  | 0.563427  | 0.051866  | 0.081389  | -0.011549 | -0.010688 | -0.007062 | -0.008888 | -0.003791 | -0.003178 | -0.003061 | -0.003564 |
| 99  | 0.081601  | 0.051866  | 0.563710  | 0.137517  | -0.010743 | -0.009388 | -0.010719 | -0.011528 | -0.003562 | -0.002939 | -0.003281 | -0.003768 |
| 100 | 0.091337  | 0.081389  | 0.137517  | 0.557647  | -0.011139 | -0.010666 | -0.011483 | -0.012175 | -0.003789 | -0.003429 | -0.003768 | -0.004072 |
| 101 | -0.012230 | -0.011549 | -0.010743 | -0.011139 | 0.557793  | 0.138252  | 0.081812  | 0.091958  | -0.012442 | -0.011569 | -0.009117 | -0.010604 |
| 102 | -0.011476 | -0.010688 | -0.009388 | -0.010666 | 0.138252  | 0.558789  | 0.051822  | 0.081605  | -0.011535 | -0.010564 | -0.007079 | -0.008901 |
| 103 | -0.008857 | -0.007062 | -0.010719 | -0.011483 | 0.081812  | 0.051822  | 0.562547  | 0.136995  | -0.010586 | -0.009153 | -0.010657 | -0.011455 |
| 104 | -0.010345 | -0.008888 | -0.011528 | -0.012175 | 0.091958  | 0.081605  | 0.136995  | 0.558015  | -0.011182 | -0.010619 | -0.011641 | -0.012340 |
| 105 | -0.004117 | -0.003791 | -0.003562 | -0.003789 | -0.012442 | -0.011535 | -0.010586 | -0.011182 | 0.556598  | 0.137850  | 0.081462  | 0.091441  |
| 106 | -0.003676 | -0.003178 | -0.002939 | -0.003429 | -0.011569 | -0.010564 | -0.009153 | -0.010619 | 0.137850  | 0.557706  | 0.051612  | 0.081159  |

|     |           |           |           |           |           |           |           |           |           |           |           |           |
|-----|-----------|-----------|-----------|-----------|-----------|-----------|-----------|-----------|-----------|-----------|-----------|-----------|
| 107 | -0.003597 | -0.003061 | -0.003281 | -0.003768 | -0.009117 | -0.007079 | -0.010657 | -0.011641 | 0.081462  | 0.051612  | 0.563897  | 0.136866  |
| 108 | -0.003813 | -0.003564 | -0.003768 | -0.004072 | -0.010604 | -0.008901 | -0.011455 | -0.012340 | 0.091441  | 0.081159  | 0.136866  | 0.557126  |
| 109 | 0.046923  | 0.080400  | -0.019751 | -0.014986 | -0.006671 | -0.005786 | -0.005287 | -0.006258 | -0.005113 | -0.003450 | -0.005096 | -0.005933 |
| 110 | -0.011789 | -0.040199 | -0.047084 | -0.041027 | -0.005688 | -0.004344 | -0.002831 | -0.004803 | -0.005721 | -0.004253 | -0.005002 | -0.006225 |
| 111 | -0.040230 | -0.046215 | -0.037608 | -0.010213 | 0.044737  | 0.073858  | -0.020393 | -0.015592 | -0.006228 | -0.005084 | -0.004545 | -0.005618 |
| 112 | -0.014879 | -0.019822 | 0.079095  | 0.045022  | -0.009621 | -0.033719 | -0.046590 | -0.040779 | -0.005973 | -0.004780 | -0.003249 | -0.005059 |
| 113 | -0.004825 | -0.002877 | -0.004588 | -0.005468 | -0.040704 | -0.046725 | -0.035785 | -0.010062 | 0.044406  | 0.071855  | -0.020400 | -0.015695 |
| 114 | -0.005808 | -0.004833 | -0.005310 | -0.006520 | -0.015948 | -0.019820 | 0.076083  | 0.044255  | -0.009333 | -0.032016 | -0.045966 | -0.040195 |
| 115 | -0.006851 | -0.005459 | -0.004886 | -0.006019 | -0.004828 | -0.003314 | -0.004918 | -0.005637 | -0.040549 | -0.046446 | -0.037496 | -0.009910 |
| 116 | -0.005633 | -0.004800 | -0.003024 | -0.004832 | -0.005852 | -0.004246 | -0.004931 | -0.006413 | -0.014761 | -0.018842 | 0.078399  | 0.045274  |
| 117 | 0.001065  | 0.001434  | 0.001962  | 0.002363  | -0.004881 | -0.003998 | -0.003982 | -0.004881 | -0.001828 | -0.001684 | -0.002693 | -0.002896 |
| 118 | -0.000359 | 0.000151  | 0.000596  | 0.000310  | -0.003072 | -0.002338 | -0.002268 | -0.003126 | -0.002199 | -0.001546 | -0.001873 | -0.002504 |
| 119 | -0.000503 | 0.000030  | 0.000302  | 0.000055  | 0.000110  | 0.000516  | 0.000011  | -0.000146 | -0.002127 | -0.001613 | -0.001539 | -0.002194 |
| 120 | -0.000957 | -0.000618 | -0.000593 | -0.000867 | -0.000398 | -0.000164 | -0.000245 | -0.000480 | -0.001003 | -0.000705 | -0.000597 | -0.000901 |
| 121 | 0.000578  | 0.000380  | 0.000335  | 0.000524  | 0.000285  | 0.000149  | 0.000179  | 0.000336  | 0.000612  | 0.000406  | 0.000367  | 0.000537  |
| 122 | 0.000383  | 0.000242  | 0.000260  | 0.000346  | 0.000116  | 0.000019  | 0.000070  | 0.000149  | 0.000386  | 0.000295  | 0.000226  | 0.000361  |
| 123 | -0.000790 | -0.000481 | -0.000235 | -0.000521 | -0.001525 | -0.001177 | -0.001203 | -0.001597 | -0.001344 | -0.000980 | -0.001000 | -0.001385 |
| 124 | 0.000260  | 0.000215  | 0.000036  | 0.000205  | 0.000690  | 0.000552  | 0.000527  | 0.000706  | 0.000543  | 0.000393  | 0.000391  | 0.000527  |
| 125 | 0.000522  | 0.000259  | 0.000193  | 0.000309  | 0.000832  | 0.000620  | 0.000672  | 0.000885  | 0.000806  | 0.000592  | 0.000615  | 0.000861  |
| 126 | -0.000719 | -0.000275 | 0.000438  | -0.000005 | -0.001255 | -0.000779 | -0.001013 | -0.001435 | -0.001852 | -0.001336 | -0.001507 | -0.002033 |
| 127 | -0.000761 | -0.000266 | 0.000026  | -0.000370 | -0.000894 | -0.000439 | -0.000700 | -0.001096 | -0.001517 | -0.001041 | -0.001126 | -0.001618 |
| 128 | -0.000055 | -0.000020 | -0.000061 | -0.000079 | 0.000012  | 0.000026  | 0.000024  | 0.000004  | -0.000075 | -0.000047 | -0.000024 | -0.000048 |
| 129 | 0.000129  | 0.000075  | 0.000101  | 0.000124  | 0.000099  | 0.000056  | 0.000062  | 0.000106  | 0.000210  | 0.000156  | 0.000120  | 0.000216  |
| 130 | 0.000132  | 0.000074  | 0.000047  | 0.000110  | 0.000182  | 0.000108  | 0.000147  | 0.000193  | 0.000117  | 0.000083  | 0.000070  | 0.000114  |
| 131 | -0.000064 | -0.000011 | -0.000034 | -0.000049 | -0.000072 | -0.000045 | -0.000053 | -0.000071 | -0.000058 | -0.000028 | -0.000078 | -0.000041 |
| 132 | -0.000096 | -0.000098 | -0.000028 | -0.000080 | -0.000083 | -0.000062 | -0.000077 | -0.000100 | -0.000095 | -0.000066 | -0.000043 | -0.000118 |
| 133 | -0.000052 | -0.000025 | -0.000028 | -0.000031 | -0.000144 | -0.000085 | -0.000108 | -0.000139 | -0.000106 | -0.000103 | -0.000049 | -0.000130 |
| 134 | -0.000220 | 0.001522  | 0.001330  | 0.000265  | -0.001911 | -0.001370 | -0.001508 | -0.001730 | 0.004011  | 0.003721  | 0.003957  | 0.003327  |
| 135 | -0.002318 | -0.001064 | 0.000291  | -0.001229 | -0.000109 | 0.000438  | -0.000141 | -0.000602 | -0.000331 | 0.000049  | -0.001610 | -0.002159 |
| 136 | -0.003616 | -0.002960 | -0.000457 | -0.002082 | -0.000505 | -0.000223 | 0.000831  | 0.000364  | 0.001551  | 0.001267  | 0.000057  | 0.000979  |
| 137 | -0.003972 | -0.004190 | -0.001980 | -0.003106 | -0.000151 | -0.000627 | 0.001670  | 0.001821  | 0.001806  | 0.001413  | 0.001027  | 0.001316  |
| 138 | 0.002219  | 0.002035  | 0.004296  | 0.003446  | 0.000874  | -0.000040 | 0.001539  | 0.002304  | 0.002367  | 0.001457  | 0.001182  | 0.001722  |
| 139 | 0.010401  | 0.004400  | 0.021606  | 0.022475  | 0.001354  | 0.000624  | 0.003806  | 0.004635  | -0.002255 | -0.001901 | -0.002202 | -0.002154 |
| 140 | -0.005796 | -0.012333 | 0.000982  | -0.001047 | 0.002183  | 0.001007  | 0.003422  | 0.004526  | 0.001065  | 0.000426  | 0.001271  | 0.001295  |
| 141 | 0.012421  | 0.011033  | 0.007362  | 0.006816  | 0.001274  | 0.000811  | 0.002410  | 0.003322  | 0.000003  | -0.000033 | -0.000384 | -0.000398 |
| 142 | -0.002918 | -0.004680 | -0.006051 | -0.007119 | 0.001374  | 0.001653  | 0.001158  | 0.001676  | -0.000467 | 0.000057  | 0.000042  | -0.000485 |
| 143 | -0.005653 | -0.007884 | 0.015713  | 0.007455  | -0.002943 | -0.001197 | -0.001573 | -0.001433 | -0.001265 | -0.000948 | 0.000222  | -0.000461 |
| 144 | -0.002005 | -0.002501 | -0.004771 | -0.003208 | 0.045003  | 0.041319  | 0.022211  | 0.033645  | -0.008267 | -0.008897 | -0.004563 | -0.005511 |
| 145 | 0.000066  | -0.001260 | 0.000547  | 0.000376  | 0.009873  | 0.006612  | -0.014380 | -0.011214 | -0.001765 | -0.001874 | 0.000963  | 0.000142  |
| 146 | 0.000512  | 0.000367  | 0.001385  | 0.000974  | -0.001512 | -0.001369 | 0.001198  | 0.002882  | -0.000767 | -0.001161 | 0.000159  | 0.000122  |
| 147 | 0.001744  | 0.001032  | -0.000473 | 0.000889  | 0.005327  | 0.001734  | 0.003956  | 0.004790  | -0.000527 | -0.000626 | -0.001382 | -0.000957 |
| 148 | 0.004967  | 0.003532  | 0.000723  | 0.002930  | -0.010778 | -0.007958 | -0.015616 | -0.011049 | 0.004952  | 0.002409  | 0.003347  | 0.005550  |
| 149 | -0.001396 | -0.000917 | -0.001309 | -0.001417 | 0.000998  | 0.001425  | 0.000229  | 0.000029  | 0.006556  | -0.000190 | 0.027565  | 0.028892  |
| 150 | 0.001973  | 0.001187  | 0.000353  | 0.001702  | 0.004984  | 0.004747  | 0.000860  | 0.001570  | -0.006170 | -0.003253 | -0.001024 | 0.000135  |
| 151 | 0.001524  | 0.001589  | -0.000254 | 0.000746  | -0.001535 | -0.000935 | -0.003792 | -0.003336 | 0.008615  | 0.006999  | -0.006377 | -0.002087 |
| 152 | -0.000314 | 0.000537  | -0.000801 | -0.000776 | 0.000562  | 0.001419  | -0.002534 | -0.002334 | 0.006423  | 0.008325  | -0.003618 | -0.004031 |
| 153 | -0.000657 | 0.000478  | 0.000104  | -0.000639 | 0.001431  | 0.002439  | -0.000196 | -0.000465 | -0.008956 | -0.008860 | 0.002811  | 0.006317  |
| 154 | 0.000707  | -0.002901 | -0.001668 | -0.001593 | 0.001126  | 0.000174  | 0.002509  | 0.003464  | 0.001448  | 0.000786  | 0.000616  | 0.001095  |
| 155 | 0.001211  | 0.000291  | 0.005314  | 0.001906  | -0.004108 | -0.003237 | -0.004985 | -0.006027 | -0.001614 | -0.001380 | 0.000238  | -0.000401 |
| 156 | 0.002803  | 0.001886  | -0.000079 | 0.001423  | -0.003302 | -0.003832 | -0.004088 | -0.001714 | 0.006426  | 0.006616  | -0.001838 | 0.000674  |



|     |           |           |           |           |           |           |           |           |           |           |           |           |
|-----|-----------|-----------|-----------|-----------|-----------|-----------|-----------|-----------|-----------|-----------|-----------|-----------|
| 157 | -0.001598 | -0.000464 | -0.000086 | -0.001297 | 0.000481  | 0.001354  | -0.000441 | -0.000453 | -0.001889 | -0.000702 | -0.004192 | -0.004382 |
| 158 | 0.000105  | 0.000121  | 0.000069  | 0.000190  | -0.000536 | -0.000506 | -0.000445 | -0.000589 | 0.000092  | 0.000094  | 0.000108  | 0.000151  |
| 159 | -0.001036 | -0.000964 | -0.000715 | -0.000802 | -0.000890 | -0.001000 | -0.000960 | -0.001411 | 0.001154  | 0.001098  | 0.001146  | 0.000871  |
| 160 | -0.001087 | -0.000980 | -0.000788 | -0.000920 | -0.000460 | -0.000620 | -0.000526 | -0.000836 | 0.000751  | 0.000739  | 0.000806  | 0.000465  |
| 161 | -0.000120 | -0.000150 | -0.000147 | -0.000163 | 0.000280  | 0.000191  | 0.000216  | 0.000276  | -0.000027 | -0.000041 | -0.000048 | -0.000158 |
| 162 | -0.002002 | -0.001138 | -0.001100 | -0.001823 | 0.001200  | 0.000989  | 0.000603  | 0.000760  | -0.001021 | -0.000793 | -0.001129 | -0.001328 |
| 163 | -0.001428 | -0.001438 | -0.001553 | -0.001919 | 0.002389  | 0.001870  | 0.002292  | 0.002825  | -0.001143 | -0.001051 | -0.001295 | -0.001853 |
| 164 | -0.004931 | -0.003335 | -0.001162 | -0.003683 | -0.000365 | 0.000043  | 0.001920  | 0.001199  | 0.002784  | 0.002541  | 0.000163  | 0.001387  |
| 165 | 0.000080  | 0.000531  | -0.001267 | -0.001147 | -0.000114 | -0.000218 | 0.000169  | 0.000168  | -0.000683 | -0.000501 | -0.000861 | -0.001148 |
| 166 | 0.006469  | 0.007211  | 0.001874  | 0.003841  | 0.000096  | 0.000746  | -0.002674 | -0.002871 | -0.003675 | -0.002922 | -0.002420 | -0.003167 |
| 167 | 0.011955  | 0.018152  | -0.004514 | -0.000206 | 0.002898  | 0.001720  | 0.004658  | 0.006181  | -0.000038 | -0.000046 | -0.000483 | -0.000677 |
| 168 | -0.013881 | -0.016434 | -0.018824 | -0.015558 | 0.001568  | 0.001190  | 0.001395  | 0.001468  | 0.000526  | 0.000554  | 0.000669  | 0.000608  |
| 169 | -0.004362 | -0.005234 | -0.009695 | 0.004877  | -0.001708 | -0.002662 | -0.001601 | -0.002384 | 0.000937  | 0.000116  | 0.000019  | 0.000896  |
| 170 | -0.007120 | -0.005277 | -0.003646 | -0.004376 | 0.013372  | 0.004028  | 0.005492  | 0.013805  | 0.003661  | 0.002948  | 0.001251  | 0.001747  |
| 171 | -0.001081 | -0.000876 | -0.002209 | -0.001616 | 0.011387  | 0.009734  | -0.000410 | -0.001861 | 0.000645  | 0.001211  | -0.000343 | -0.000482 |
| 172 | -0.003292 | -0.001918 | -0.000768 | -0.002353 | 0.000156  | 0.005725  | -0.016552 | -0.010633 | 0.002460  | 0.003254  | 0.002705  | 0.001855  |
| 173 | 0.001829  | 0.002006  | -0.000918 | 0.000558  | -0.001706 | -0.000776 | -0.006711 | -0.005776 | 0.017182  | 0.016539  | -0.006578 | -0.001284 |
| 174 | -0.000561 | -0.000539 | -0.000394 | -0.000441 | 0.000720  | 0.000672  | -0.000668 | -0.000321 | 0.003690  | 0.004585  | 0.002269  | -0.000117 |
| 175 | 0.000146  | -0.001227 | 0.000952  | 0.000901  | -0.000146 | -0.001514 | 0.003250  | 0.003328  | -0.004629 | -0.007145 | 0.003274  | 0.009645  |
| 176 | -0.003649 | -0.006930 | -0.009356 | -0.007123 | 0.000066  | -0.001410 | 0.001007  | 0.001746  | -0.001787 | -0.001603 | 0.001923  | -0.000132 |
| 177 | -0.003732 | 0.006935  | -0.004044 | -0.001925 | -0.001420 | 0.000017  | -0.003354 | -0.003544 | -0.002672 | -0.001765 | 0.000891  | -0.000851 |
| 178 | 0.004115  | 0.000853  | 0.011655  | 0.002252  | -0.002998 | -0.002607 | -0.005605 | -0.007419 | -0.001207 | -0.000031 | -0.000350 | -0.000972 |
| 179 | -0.001216 | -0.003373 | -0.005112 | -0.000646 | 0.013169  | 0.019964  | 0.002872  | 0.002445  | 0.000074  | -0.000203 | -0.002686 | -0.001488 |
| 180 | 0.000908  | 0.000523  | -0.001725 | 0.000412  | 0.006174  | 0.005905  | -0.005669 | 0.003573  | -0.002649 | 0.001469  | -0.007157 | -0.007906 |
| 181 | -0.003185 | -0.001968 | -0.000581 | -0.001977 | 0.012418  | 0.012896  | 0.005761  | 0.005403  | -0.021068 | -0.026631 | -0.002271 | -0.009527 |
| 182 | -0.003681 | -0.002838 | -0.000727 | -0.002592 | 0.004174  | 0.003881  | 0.004742  | 0.004239  | 0.000262  | 0.001590  | -0.024677 | -0.010383 |
| 183 | -0.001205 | -0.002957 | -0.000750 | -0.000839 | 0.001946  | 0.000570  | 0.002939  | 0.004103  | 0.003587  | 0.003015  | 0.007144  | 0.004392  |
| 184 | -0.001505 | -0.001355 | -0.001016 | -0.001302 | 0.000372  | 0.000107  | 0.000193  | 0.000090  | 0.001035  | 0.000983  | 0.000939  | 0.000586  |
| 185 | -0.001246 | -0.001163 | -0.000770 | -0.000967 | -0.001355 | -0.001340 | -0.001448 | -0.001976 | 0.001437  | 0.001397  | 0.001434  | 0.001129  |
| 186 | 0.000073  | 0.000099  | 0.000005  | 0.000054  | 0.000131  | 0.000118  | 0.000194  | 0.000235  | -0.000207 | -0.000184 | -0.000246 | -0.000130 |
| 187 | 0.001501  | 0.001369  | 0.001068  | 0.001318  | 0.000609  | 0.000724  | 0.000705  | 0.001059  | -0.001047 | -0.001050 | -0.000984 | -0.000696 |
| 188 | 0.001213  | 0.001091  | 0.000755  | 0.000945  | 0.000220  | 0.000381  | 0.000345  | 0.000585  | -0.001273 | -0.001194 | -0.001204 | -0.000949 |
| 189 | 0.000058  | 0.000018  | 0.000053  | 0.000044  | 0.000006  | 0.000020  | 0.000004  | 0.000014  | -0.000008 | -0.000003 | -0.000007 | -0.000013 |
| 190 | 0.001260  | -0.013416 | -0.001789 | -0.001880 | -0.000205 | -0.000298 | -0.000333 | -0.000310 | -0.000325 | -0.000315 | -0.000208 | -0.000207 |
| 191 | 0.001588  | -0.001811 | 0.000406  | -0.000166 | -0.000139 | -0.000129 | -0.000263 | -0.000240 | -0.000067 | -0.000082 | -0.000122 | -0.000059 |
| 192 | -0.002494 | -0.000422 | -0.000364 | -0.000449 | -0.000047 | 0.000018  | 0.000008  | 0.000024  | -0.000030 | -0.000047 | -0.000024 | 0.000004  |
| 193 | 0.002442  | 0.001712  | 0.000900  | 0.000753  | 0.000006  | -0.000051 | -0.000091 | -0.000087 | -0.000110 | -0.000097 | -0.000137 | -0.000155 |
| 194 | -0.002952 | -0.003865 | -0.000756 | -0.001133 | -0.000068 | -0.000174 | -0.000084 | -0.000071 | -0.000087 | -0.000067 | 0.000054  | 0.000087  |
| 195 | 0.002721  | -0.000866 | -0.000403 | -0.000535 | -0.000264 | -0.000220 | -0.000392 | -0.000376 | -0.000463 | -0.000486 | -0.000437 | -0.000378 |
| 196 | 0.000693  | 0.000293  | 0.000297  | 0.000205  | -0.000015 | -0.000001 | -0.000087 | -0.000074 | -0.000028 | -0.000029 | 0.000000  | -0.000030 |
| 197 | -0.000685 | 0.000113  | -0.000022 | -0.000196 | -0.000024 | -0.000043 | -0.000052 | -0.000040 | -0.000061 | -0.000054 | -0.000067 | -0.000055 |
| 198 | -0.000380 | 0.000292  | -0.000080 | -0.000132 | -0.000034 | -0.000055 | -0.000033 | -0.000025 | -0.000031 | -0.000035 | -0.000048 | -0.000035 |
| 199 | -0.000337 | 0.000061  | -0.000122 | -0.000182 | -0.000050 | -0.000039 | -0.000059 | -0.000049 | -0.000062 | -0.000047 | -0.000056 | -0.000045 |
| 200 | -0.000110 | 0.000408  | -0.000031 | -0.000017 | 0.000037  | 0.000075  | 0.000034  | 0.000033  | 0.000001  | -0.000009 | 0.000036  | 0.000039  |
| 201 | -0.001828 | -0.001754 | -0.012658 | 0.000643  | 0.003133  | -0.002221 | -0.000351 | -0.000596 | -0.000198 | -0.000256 | -0.000272 | -0.000289 |
| 202 | 0.000121  | 0.000691  | -0.001211 | 0.001652  | -0.002371 | -0.003599 | -0.000494 | -0.000892 | -0.000085 | -0.000080 | -0.000110 | -0.000117 |
| 203 | -0.000566 | -0.000456 | -0.000859 | -0.002260 | 0.001385  | 0.000600  | 0.000631  | 0.000546  | 0.000088  | 0.000097  | 0.000026  | 0.000022  |
| 204 | 0.000433  | 0.000578  | 0.000827  | 0.002053  | -0.001865 | -0.001272 | -0.000196 | -0.000407 | -0.000037 | -0.000083 | -0.000013 | 0.000004  |
| 205 | -0.000765 | -0.000385 | -0.003431 | -0.002352 | 0.000825  | -0.001963 | 0.000559  | -0.000052 | -0.000036 | -0.000136 | -0.000157 | -0.000141 |
| 206 | -0.000646 | -0.000530 | -0.001095 | 0.002578  | 0.001895  | -0.010071 | -0.001766 | -0.001772 | -0.000332 | -0.000308 | -0.000448 | -0.000476 |

|     |           |           |           |           |           |           |           |           |           |           |           |           |
|-----|-----------|-----------|-----------|-----------|-----------|-----------|-----------|-----------|-----------|-----------|-----------|-----------|
| 207 | 0.000239  | 0.000310  | -0.000265 | 0.000522  | -0.000233 | 0.000328  | -0.000006 | -0.000029 | 0.000021  | 0.000026  | 0.000014  | 0.000001  |
| 208 | -0.000241 | -0.000075 | 0.000083  | -0.000673 | -0.000414 | 0.000075  | -0.000116 | -0.000194 | -0.000028 | -0.000039 | -0.000029 | -0.000032 |
| 209 | -0.000119 | -0.000059 | 0.000295  | -0.000365 | -0.000375 | 0.000313  | -0.000062 | -0.000132 | -0.000032 | -0.000047 | -0.000029 | -0.000021 |
| 210 | -0.000234 | -0.000169 | 0.000014  | -0.000413 | -0.000583 | 0.000145  | -0.000074 | -0.000218 | -0.000029 | -0.000051 | -0.000036 | -0.000035 |
| 211 | -0.000009 | -0.000011 | 0.000518  | -0.000187 | 0.000315  | -0.000197 | 0.000132  | 0.000088  | 0.000047  | 0.000043  | 0.000016  | 0.000001  |
| 212 | -0.000410 | -0.000346 | -0.000307 | -0.000334 | -0.000676 | -0.000600 | -0.001182 | 0.002444  | 0.001573  | 0.010452  | -0.001786 | -0.001869 |
| 213 | -0.000025 | -0.000047 | -0.000053 | 0.000011  | -0.000819 | -0.000429 | -0.003301 | -0.002413 | 0.000822  | -0.001836 | 0.000473  | -0.000047 |
| 214 | -0.000092 | -0.000122 | -0.000077 | -0.000021 | 0.000462  | 0.000615  | 0.000739  | 0.002067  | -0.001760 | -0.001299 | -0.000289 | -0.000398 |
| 215 | 0.000003  | 0.000022  | -0.000062 | -0.000079 | -0.000528 | -0.000484 | -0.000686 | -0.002288 | 0.001489  | 0.000569  | 0.000697  | 0.000554  |
| 216 | -0.000173 | -0.000143 | -0.000101 | -0.000058 | 0.000105  | 0.000642  | -0.001476 | 0.001655  | -0.002357 | -0.003620 | -0.000406 | -0.000872 |
| 217 | -0.000317 | -0.000334 | -0.000283 | -0.000201 | -0.001761 | -0.001666 | -0.012381 | 0.000889  | 0.003134  | -0.001981 | -0.000421 | -0.000543 |
| 218 | 0.000016  | 0.000018  | 0.000048  | 0.000023  | 0.000046  | 0.000017  | 0.000493  | -0.000114 | 0.000577  | -0.000172 | 0.000181  | 0.000169  |
| 219 | -0.000054 | -0.000043 | -0.000064 | -0.000061 | -0.000240 | -0.000176 | 0.000002  | -0.000407 | -0.000561 | 0.000135  | -0.000053 | -0.000195 |
| 220 | -0.000016 | -0.000020 | -0.000042 | -0.000023 | -0.000130 | -0.000075 | 0.000280  | -0.000370 | -0.000370 | 0.000295  | -0.000063 | -0.000121 |
| 221 | -0.000065 | -0.000050 | -0.000068 | -0.000047 | -0.000227 | -0.000063 | 0.000114  | -0.000671 | -0.000404 | 0.000073  | -0.000128 | -0.000187 |
| 222 | -0.000015 | -0.000029 | 0.000023  | 0.000042  | 0.000210  | 0.000266  | -0.000133 | 0.000424  | -0.000278 | 0.000349  | -0.000078 | -0.000081 |
| 223 | -0.000318 | -0.000325 | -0.000429 | -0.000420 | -0.000470 | -0.000477 | -0.000346 | -0.000363 | -0.001966 | -0.001964 | -0.011085 | 0.001641  |
| 224 | -0.000077 | -0.000136 | -0.000088 | -0.000073 | -0.000120 | -0.000096 | -0.000114 | 0.000029  | 0.000281  | 0.000912  | -0.001301 | 0.001559  |
| 225 | 0.000012  | -0.000027 | -0.000076 | -0.000061 | -0.000070 | -0.000062 | -0.000170 | -0.000105 | -0.000663 | -0.000479 | -0.001466 | -0.002333 |
| 226 | -0.000089 | -0.000093 | -0.000028 | -0.000007 | -0.000033 | -0.000032 | 0.000054  | 0.000012  | 0.000534  | 0.000639  | 0.000679  | 0.001717  |
| 227 | -0.000032 | -0.000095 | -0.000178 | -0.000171 | -0.000091 | -0.000084 | -0.000053 | -0.000088 | -0.000915 | -0.000539 | -0.003892 | -0.002476 |
| 228 | -0.000173 | -0.000236 | -0.000292 | -0.000300 | -0.000374 | -0.000347 | -0.000357 | -0.000257 | -0.000717 | -0.000511 | -0.002064 | 0.002927  |
| 229 | 0.000021  | 0.000037  | 0.000011  | 0.000007  | -0.000030 | -0.000039 | 0.000021  | 0.000019  | 0.000133  | 0.000185  | -0.000401 | 0.000448  |
| 230 | -0.000048 | -0.000054 | -0.000053 | -0.000039 | -0.000065 | -0.000055 | -0.000064 | -0.000055 | -0.000241 | -0.000084 | 0.000105  | -0.000643 |
| 231 | -0.000023 | -0.000040 | -0.000022 | -0.000014 | -0.000024 | -0.000025 | -0.000042 | -0.000028 | -0.000117 | -0.000053 | 0.000301  | -0.000368 |
| 232 | -0.000020 | -0.000054 | -0.000041 | -0.000032 | -0.000050 | -0.000027 | -0.000052 | -0.000040 | -0.000222 | -0.000146 | -0.000003 | -0.000422 |
| 233 | 0.000010  | 0.000006  | -0.000038 | -0.000043 | -0.000013 | -0.000006 | 0.000000  | 0.000008  | -0.000078 | -0.000047 | 0.000331  | -0.000280 |
| 234 | 0.000641  | 0.000012  | -0.000327 | -0.001056 | -0.000143 | -0.000446 | -0.000330 | -0.000362 | -0.000545 | -0.000451 | -0.000249 | -0.000290 |
| 235 | -0.003793 | -0.015928 | -0.002710 | -0.002698 | -0.000025 | 0.000140  | -0.000088 | -0.000074 | 0.000038  | -0.000020 | -0.000076 | 0.000077  |
| 236 | 0.001368  | 0.002579  | 0.000361  | 0.000762  | -0.000026 | 0.000097  | 0.000068  | 0.000079  | 0.000194  | 0.000158  | 0.000122  | 0.000111  |
| 237 | 0.000956  | 0.003287  | 0.000334  | 0.000480  | -0.000086 | 0.000028  | 0.000018  | 0.000031  | 0.000123  | 0.000090  | 0.000027  | 0.000036  |
| 238 | 0.000410  | 0.000264  | 0.000472  | 0.000359  | 0.000049  | -0.000008 | -0.000010 | -0.000010 | -0.000054 | -0.000031 | -0.000034 | -0.000062 |
| 239 | 0.000676  | 0.000251  | 0.000449  | 0.000464  | 0.000082  | 0.000042  | 0.000050  | 0.000045  | 0.000003  | 0.000017  | 0.000018  | -0.000021 |
| 240 | -0.001343 | -0.000556 | -0.000169 | -0.000328 | 0.000040  | 0.000014  | 0.000045  | 0.000044  | 0.000040  | 0.000040  | 0.000026  | 0.000048  |
| 241 | -0.001222 | -0.000722 | -0.000171 | -0.000311 | 0.000036  | 0.000007  | 0.000036  | 0.000035  | 0.000041  | 0.000042  | 0.000028  | 0.000050  |
| 242 | -0.000505 | 0.001572  | -0.000089 | 0.000035  | -0.000020 | 0.000063  | 0.000035  | 0.000025  | 0.000061  | 0.000047  | 0.000055  | 0.000059  |
| 243 | -0.000843 | 0.001187  | -0.000212 | -0.000164 | -0.000047 | 0.000014  | -0.000015 | -0.000019 | 0.000006  | 0.000004  | 0.000011  | 0.000034  |
| 244 | 0.001835  | 0.003587  | 0.000977  | 0.001152  | 0.000030  | -0.000026 | 0.000048  | 0.000065  | 0.000028  | 0.000033  | 0.000002  | -0.000045 |
| 245 | 0.001845  | 0.004535  | 0.001095  | 0.001313  | 0.000110  | 0.000075  | 0.000140  | 0.000141  | 0.000065  | 0.000070  | 0.000068  | 0.000000  |
| 246 | -0.001246 | -0.000655 | -0.001129 | 0.000849  | -0.001452 | -0.000891 | -0.001860 | -0.002241 | -0.000335 | -0.000549 | -0.000513 | -0.000469 |
| 247 | -0.002392 | -0.002276 | -0.012502 | -0.004175 | 0.000087  | -0.002251 | -0.000858 | -0.001187 | 0.000044  | 0.000195  | 0.000013  | -0.000072 |
| 248 | 0.000925  | 0.000543  | 0.002728  | 0.000701  | 0.001147  | 0.003146  | 0.000730  | 0.001038  | 0.000090  | 0.000169  | 0.000154  | 0.000145  |
| 249 | 0.000619  | 0.000480  | 0.002498  | 0.001494  | 0.001337  | 0.002110  | 0.000640  | 0.000904  | 0.000045  | 0.000087  | 0.000086  | 0.000089  |
| 250 | 0.000180  | 0.000276  | 0.000093  | 0.000401  | -0.000632 | 0.000798  | 0.000016  | -0.000027 | -0.000021 | -0.000039 | -0.000007 | -0.000007 |
| 251 | 0.000304  | 0.000279  | 0.000116  | 0.000682  | -0.000274 | 0.001180  | 0.000139  | 0.000183  | 0.000016  | 0.000000  | 0.000039  | 0.000044  |
| 252 | -0.000306 | -0.000145 | -0.000382 | -0.001316 | -0.001242 | -0.000352 | -0.000133 | -0.000283 | 0.000046  | 0.000036  | 0.000043  | 0.000049  |
| 253 | -0.000286 | -0.000134 | -0.000529 | -0.001200 | -0.001329 | -0.000270 | -0.000132 | -0.000296 | 0.000047  | 0.000024  | 0.000044  | 0.000053  |
| 254 | 0.000084  | -0.000021 | 0.001467  | -0.000398 | 0.000465  | 0.000249  | 0.000224  | 0.000315  | 0.000053  | 0.000086  | 0.000046  | 0.000035  |
| 255 | -0.000113 | -0.000148 | 0.001087  | -0.000736 | 0.000228  | 0.000173  | 0.000204  | 0.000189  | 0.000019  | 0.000037  | -0.000014 | -0.000015 |
| 256 | 0.001027  | 0.000841  | 0.002779  | 0.001881  | 0.000940  | 0.001706  | 0.000583  | 0.000655  | -0.000015 | -0.000053 | 0.000048  | 0.000065  |

|     |           |           |           |           |           |           |           |           |           |           |           |           |
|-----|-----------|-----------|-----------|-----------|-----------|-----------|-----------|-----------|-----------|-----------|-----------|-----------|
| 257 | 0.001215  | 0.000969  | 0.003852  | 0.001839  | 0.000707  | 0.002350  | 0.000438  | 0.000739  | 0.000006  | 0.000005  | 0.000063  | 0.000081  |
| 258 | -0.000150 | -0.000041 | -0.000081 | -0.000086 | -0.002433 | -0.002484 | -0.012633 | -0.003790 | 0.000681  | -0.002061 | -0.000274 | -0.000884 |
| 259 | -0.000391 | -0.000405 | -0.000289 | -0.000201 | -0.001385 | -0.000540 | -0.000922 | 0.000470  | -0.002433 | -0.009016 | -0.002375 | -0.002483 |
| 260 | 0.000162  | 0.000120  | 0.000138  | 0.000127  | 0.001308  | 0.001079  | 0.003902  | 0.001869  | 0.000577  | 0.002228  | 0.000239  | 0.000641  |
| 261 | 0.000090  | 0.000015  | 0.000026  | 0.000060  | 0.001040  | 0.000840  | 0.002683  | 0.001815  | 0.001105  | 0.001731  | 0.000449  | 0.000627  |
| 262 | -0.000033 | -0.000001 | -0.000017 | -0.000054 | -0.000129 | -0.000168 | 0.001099  | -0.000759 | 0.000263  | 0.000175  | 0.000307  | 0.000220  |
| 263 | 0.000021  | 0.000045  | 0.000022  | -0.000026 | 0.000071  | -0.000057 | 0.001468  | -0.000420 | 0.000504  | 0.000237  | 0.000318  | 0.000345  |
| 264 | 0.000050  | 0.000048  | 0.000025  | 0.000046  | -0.000323 | -0.000170 | -0.000519 | -0.001234 | -0.001319 | -0.000247 | -0.000130 | -0.000299 |
| 265 | 0.000055  | 0.000056  | 0.000029  | 0.000049  | -0.000328 | -0.000162 | -0.000361 | -0.001332 | -0.001232 | -0.000339 | -0.000119 | -0.000281 |
| 266 | 0.000013  | -0.000012 | 0.000023  | 0.000040  | 0.000323  | 0.000319  | 0.000084  | 0.000697  | -0.000275 | 0.001186  | 0.000062  | 0.000181  |
| 267 | -0.000043 | -0.000060 | -0.000022 | 0.000017  | 0.000205  | 0.000319  | 0.000060  | 0.000434  | -0.000608 | 0.000820  | -0.000058 | -0.000018 |
| 268 | 0.000092  | 0.000098  | 0.000037  | -0.000015 | 0.000748  | 0.000554  | 0.002489  | 0.001510  | 0.001420  | 0.002119  | 0.000717  | 0.000883  |
| 269 | 0.000136  | 0.000136  | 0.000109  | 0.000041  | 0.000906  | 0.000474  | 0.002699  | 0.000755  | 0.001305  | 0.003137  | 0.000858  | 0.001063  |
| 270 | 0.000043  | -0.000028 | -0.000083 | -0.000119 | -0.000045 | -0.000045 | 0.000245  | -0.000021 | -0.000893 | -0.000569 | -0.001707 | 0.000719  |
| 271 | -0.000211 | -0.000275 | -0.000320 | -0.000320 | -0.000390 | -0.000325 | -0.000542 | -0.000162 | -0.002370 | -0.002049 | -0.009813 | -0.002238 |
| 272 | 0.000124  | 0.000165  | 0.000155  | 0.000165  | 0.000047  | 0.000033  | -0.000060 | -0.000007 | 0.000501  | 0.000184  | 0.001992  | 0.000580  |
| 273 | 0.000026  | 0.000037  | 0.000049  | 0.000065  | -0.000004 | -0.000009 | -0.000116 | -0.000064 | 0.000482  | 0.000434  | 0.001960  | 0.000812  |
| 274 | -0.000082 | -0.000058 | -0.000049 | -0.000049 | -0.000009 | -0.000009 | 0.000067  | 0.000024  | 0.000349  | 0.000397  | 0.000327  | 0.000400  |
| 275 | -0.000051 | -0.000027 | 0.000003  | 0.000001  | 0.000069  | 0.000056  | 0.000139  | 0.000071  | 0.000488  | 0.000412  | 0.000377  | 0.000659  |
| 276 | 0.000035  | 0.000010  | 0.000039  | 0.000038  | 0.000079  | 0.000080  | 0.000050  | 0.000073  | -0.000209 | -0.000050 | -0.000126 | -0.000183 |
| 277 | 0.000041  | 0.000016  | 0.000043  | 0.000043  | 0.000069  | 0.000071  | 0.000049  | 0.000065  | -0.000214 | -0.000077 | -0.000276 | -0.001108 |
| 278 | 0.000103  | 0.000101  | 0.000071  | 0.000074  | 0.000000  | 0.000016  | -0.000053 | -0.000019 | -0.000056 | -0.000104 | 0.000999  | -0.000618 |
| 279 | 0.000084  | 0.000061  | 0.000025  | 0.000028  | -0.000051 | -0.000031 | -0.000093 | -0.000054 | -0.000250 | -0.000233 | 0.000605  | -0.000962 |
| 280 | -0.000106 | -0.000058 | -0.000015 | -0.000003 | 0.000062  | 0.000023  | 0.000091  | -0.000008 | 0.000971  | 0.000731  | 0.002267  | 0.001455  |
| 281 | -0.000008 | 0.000056  | 0.000080  | 0.000076  | 0.000172  | 0.000139  | 0.000222  | 0.000101  | 0.001196  | 0.000917  | 0.003361  | 0.001475  |
| 282 | -0.006428 | -0.015308 | -0.002581 | -0.002540 | 0.000093  | 0.000103  | 0.000500  | 0.000158  | 0.000114  | 0.000094  | 0.000423  | 0.000170  |
| 283 | 0.001174  | 0.001432  | 0.000337  | 0.000286  | -0.000090 | -0.000103 | -0.000032 | -0.000095 | -0.000003 | -0.000004 | 0.000076  | -0.000008 |
| 284 | 0.000612  | 0.000597  | 0.000103  | 0.000201  | -0.000054 | -0.000040 | -0.000095 | -0.000070 | -0.000070 | -0.000070 | -0.000082 | -0.000033 |
| 285 | 0.001153  | 0.001843  | 0.000222  | 0.000320  | -0.000071 | -0.000046 | -0.000061 | -0.000059 | -0.000005 | -0.000007 | -0.000010 | 0.000013  |
| 286 | 0.000269  | 0.000937  | -0.000025 | 0.000117  | 0.000004  | 0.000032  | 0.000011  | 0.000039  | 0.000042  | 0.000042  | -0.000001 | 0.000033  |
| 287 | -0.000748 | -0.000052 | -0.000497 | -0.000281 | -0.000057 | -0.000021 | -0.000111 | -0.000047 | -0.000133 | -0.000143 | -0.000191 | -0.000120 |
| 288 | -0.002188 | -0.002194 | -0.013639 | -0.005340 | 0.003956  | 0.011178  | 0.002414  | 0.002305  | 0.000144  | 0.000139  | -0.000111 | 0.000147  |
| 289 | 0.000303  | 0.000379  | 0.001552  | 0.001123  | -0.001009 | -0.001266 | -0.000377 | -0.000254 | 0.000026  | 0.000063  | -0.000002 | 0.000041  |
| 290 | 0.000213  | 0.000121  | 0.000546  | 0.000589  | -0.000215 | -0.000549 | -0.000060 | -0.000175 | -0.000043 | -0.000076 | -0.000056 | -0.000077 |
| 291 | 0.000321  | 0.000218  | 0.001593  | 0.001149  | -0.000973 | -0.001413 | -0.000257 | -0.000353 | 0.000039  | 0.000008  | 0.000024  | 0.000021  |
| 292 | 0.000088  | -0.000059 | 0.000873  | 0.000254  | -0.000499 | -0.000195 | -0.000006 | -0.000112 | 0.000041  | 0.000019  | 0.000062  | 0.000044  |
| 293 | -0.000312 | -0.000512 | -0.000828 | -0.000686 | 0.000971  | 0.001599  | 0.000449  | 0.000349  | -0.000084 | -0.000115 | -0.000055 | -0.000108 |
| 294 | 0.000005  | 0.000308  | -0.000062 | 0.000157  | -0.001964 | -0.002266 | -0.012627 | -0.005257 | 0.003988  | 0.010576  | 0.002093  | 0.002009  |
| 295 | -0.000025 | 0.000028  | -0.000052 | 0.000039  | 0.000381  | 0.000519  | 0.001055  | 0.000733  | -0.001069 | -0.001633 | -0.000516 | -0.000420 |
| 296 | 0.000050  | 0.000027  | 0.000038  | -0.000009 | 0.000045  | -0.000072 | 0.000731  | 0.000224  | -0.000472 | -0.000155 | 0.000053  | -0.000068 |
| 297 | -0.000024 | -0.000030 | -0.000024 | -0.000046 | 0.000314  | 0.000219  | 0.001457  | 0.001130  | -0.000989 | -0.001329 | -0.000225 | -0.000314 |
| 298 | -0.000038 | -0.000068 | -0.000014 | -0.000042 | 0.000220  | 0.000160  | 0.000526  | 0.000599  | -0.000228 | -0.000538 | -0.000052 | -0.000172 |
| 299 | 0.000124  | 0.000054  | 0.000128  | 0.000075  | -0.000322 | -0.000340 | -0.001492 | -0.001034 | 0.000841  | 0.001056  | 0.000397  | 0.000259  |
| 300 | 0.000208  | -0.000069 | 0.000332  | 0.000104  | 0.000017  | 0.000085  | 0.000253  | 0.000057  | 0.002414  | 0.002851  | 0.013412  | 0.004719  |
| 301 | 0.000090  | -0.000004 | 0.000081  | 0.000045  | 0.000113  | 0.000128  | 0.000149  | 0.000087  | -0.000394 | -0.000413 | -0.001550 | -0.001102 |
| 302 | -0.000004 | 0.000046  | 0.000031  | 0.000047  | 0.000053  | 0.000050  | 0.000024  | 0.000048  | -0.000122 | -0.000038 | -0.000346 | -0.000517 |
| 303 | -0.000043 | -0.000015 | -0.000027 | -0.000025 | 0.000013  | 0.000013  | 0.000012  | 0.000033  | -0.000379 | -0.000291 | -0.001591 | -0.001095 |
| 304 | -0.000052 | -0.000019 | -0.000069 | -0.000056 | -0.000070 | -0.000076 | -0.000070 | -0.000030 | -0.000142 | -0.000047 | -0.000786 | -0.000189 |
| 305 | 0.000048  | 0.000121  | 0.000052  | 0.000092  | 0.000005  | -0.000020 | -0.000053 | 0.000022  | 0.000301  | 0.000373  | 0.000706  | 0.000985  |
| 306 | 0.008616  | 0.025909  | 0.000035  | -0.000131 | -0.002201 | -0.002198 | -0.002189 | -0.002161 | -0.002026 | -0.002094 | -0.002128 | -0.002092 |

|     |           |           |           |           |           |           |           |           |           |           |           |           |
|-----|-----------|-----------|-----------|-----------|-----------|-----------|-----------|-----------|-----------|-----------|-----------|-----------|
| 307 | 0.000477  | 0.001279  | 0.000051  | 0.000138  | -0.000168 | -0.000117 | 0.000092  | -0.000055 | 0.000021  | 0.000012  | 0.000172  | 0.000091  |
| 308 | -0.000598 | -0.003487 | -0.000457 | -0.000421 | 0.000021  | 0.000015  | 0.000009  | -0.000028 | -0.000025 | -0.000029 | 0.000011  | -0.000016 |
| 309 | -0.001063 | -0.001856 | -0.000229 | -0.000279 | 0.000073  | 0.000053  | 0.000073  | 0.000073  | 0.000052  | 0.000057  | 0.000056  | 0.000043  |
| 310 | 0.000440  | 0.001643  | 0.000244  | 0.000198  | -0.000001 | 0.000006  | 0.000012  | 0.000012  | 0.000025  | 0.000024  | -0.000002 | 0.000011  |
| 311 | 0.001825  | 0.002945  | 0.000600  | 0.000639  | -0.000114 | -0.000105 | -0.000161 | -0.000125 | -0.000118 | -0.000116 | -0.000102 | -0.000058 |
| 312 | -0.001118 | -0.000647 | -0.000227 | -0.000291 | 0.000189  | 0.000148  | -0.000023 | 0.000124  | 0.000045  | 0.000052  | -0.000134 | -0.000070 |
| 313 | 0.000044  | 0.000239  | 0.021941  | 0.007416  | 0.003499  | 0.014171  | -0.000387 | -0.000640 | -0.001834 | -0.001849 | -0.001770 | -0.001770 |
| 314 | 0.000195  | 0.000143  | 0.001242  | 0.000979  | -0.001435 | -0.000572 | -0.000191 | -0.000253 | 0.000198  | 0.000169  | 0.000035  | 0.000148  |
| 315 | -0.000343 | -0.000375 | -0.003029 | -0.000618 | 0.001277  | 0.002002  | 0.000500  | 0.000503  | -0.000068 | -0.000062 | -0.000092 | -0.000070 |
| 316 | -0.000248 | -0.000209 | -0.001539 | -0.000982 | 0.000363  | 0.001242  | 0.000215  | 0.000180  | 0.000012  | 0.000013  | 0.000026  | 0.000031  |
| 317 | 0.000160  | 0.000198  | 0.001440  | 0.000423  | -0.000692 | -0.001337 | -0.000246 | -0.000247 | 0.000040  | 0.000036  | 0.000042  | 0.000042  |
| 318 | 0.000605  | 0.000583  | 0.002650  | 0.001698  | -0.000412 | -0.002206 | -0.000509 | -0.000455 | -0.000053 | -0.000061 | -0.000081 | -0.000110 |
| 319 | -0.000376 | -0.000348 | -0.000819 | -0.001519 | 0.000927  | 0.000909  | 0.000240  | 0.000282  | -0.000129 | -0.000093 | 0.000070  | -0.000042 |
| 320 | 0.001753  | 0.001740  | 0.001741  | 0.001815  | 0.000192  | 0.000122  | -0.020758 | -0.006706 | -0.004222 | -0.015290 | 0.000384  | 0.000681  |
| 321 | -0.000148 | -0.000026 | -0.000207 | -0.000119 | 0.000450  | 0.000298  | 0.000789  | 0.001465  | -0.001056 | -0.000892 | -0.000297 | -0.000311 |
| 322 | 0.000089  | 0.000121  | 0.000068  | 0.000094  | -0.000602 | -0.000616 | -0.002493 | -0.001678 | 0.000501  | 0.002152  | 0.000502  | 0.000438  |
| 323 | -0.000012 | -0.000008 | 0.000010  | 0.000002  | -0.000137 | -0.000170 | -0.001301 | -0.000414 | 0.000723  | 0.001259  | 0.000201  | 0.000200  |
| 324 | -0.000057 | -0.000053 | -0.000048 | -0.000052 | 0.000242  | 0.000204  | 0.001421  | 0.000954  | -0.000362 | -0.001164 | -0.000204 | -0.000153 |
| 325 | 0.000044  | 0.000008  | -0.000005 | -0.000039 | 0.000247  | 0.000304  | 0.002598  | 0.000531  | -0.001259 | -0.001799 | -0.000370 | -0.000387 |
| 326 | 0.000085  | -0.000044 | 0.000183  | 0.000114  | -0.000191 | -0.000008 | -0.000933 | -0.000834 | 0.001413  | 0.000381  | 0.000153  | 0.000199  |
| 327 | 0.002077  | 0.002070  | 0.002060  | 0.002040  | 0.002062  | 0.002110  | 0.002133  | 0.002137  | 0.000758  | 0.000422  | -0.017859 | -0.005289 |
| 328 | -0.000043 | -0.000135 | 0.000036  | -0.000059 | -0.000015 | 0.000022  | 0.000130  | 0.000083  | -0.000427 | -0.000232 | -0.001049 | -0.001019 |
| 329 | 0.000097  | 0.000072  | 0.000124  | 0.000104  | 0.000094  | 0.000098  | 0.000071  | 0.000041  | 0.000479  | 0.000577  | 0.002868  | 0.000467  |
| 330 | -0.000021 | -0.000036 | -0.000034 | -0.000040 | -0.000045 | -0.000043 | -0.000021 | -0.000037 | 0.000344  | 0.000325  | 0.001591  | 0.000936  |
| 331 | -0.000039 | -0.000026 | -0.000046 | -0.000047 | -0.000038 | -0.000035 | -0.000033 | -0.000024 | -0.000253 | -0.000291 | -0.001464 | -0.000478 |
| 332 | -0.000026 | 0.000024  | 0.000021  | 0.000053  | 0.000078  | 0.000070  | 0.000037  | 0.000066  | -0.000600 | -0.000617 | -0.002378 | -0.001524 |
| 333 | 0.000032  | 0.000103  | -0.000100 | -0.000011 | -0.000074 | -0.000111 | -0.000185 | -0.000128 | 0.000445  | 0.000225  | 0.000383  | 0.001583  |

|    | 109       | 110       | 111       | 112       | 113       | 114       | 115       | 116       | 117       | 118       | 119       | 120       |
|----|-----------|-----------|-----------|-----------|-----------|-----------|-----------|-----------|-----------|-----------|-----------|-----------|
| 1  | -0.003990 | -0.003084 | -0.002154 | -0.001713 | 0.000153  | 0.000303  | -0.001696 | -0.001234 | -0.012858 | -0.038986 | -0.040211 | -0.012885 |
| 2  | -0.009106 | -0.010165 | -0.007803 | -0.009813 | -0.010142 | -0.007682 | -0.009762 | -0.007981 | 0.006080  | -0.031242 | -0.032130 | -0.015425 |
| 3  | 0.151700  | -0.038913 | 0.008599  | -0.003929 | -0.000250 | 0.006162  | -0.035984 | 0.151277  | -0.016960 | -0.009860 | -0.007393 | 0.000177  |
| 4  | -0.038615 | 0.152226  | 0.145929  | -0.031160 | 0.008295  | -0.002786 | -0.002343 | 0.007599  | 0.006190  | 0.004755  | 0.007533  | 0.001702  |
| 5  | -0.003642 | 0.007914  | -0.036571 | 0.143738  | 0.139000  | -0.029146 | 0.006461  | -0.001202 | -0.000146 | -0.000150 | -0.005551 | -0.001291 |
| 6  | 0.004214  | 0.001427  | -0.002330 | 0.005402  | -0.027706 | 0.140530  | 0.145192  | -0.041804 | -0.005823 | -0.000431 | -0.001111 | -0.000909 |
| 7  | -0.001881 | -0.002910 | -0.002014 | -0.003853 | -0.002143 | -0.003570 | -0.001820 | -0.004652 | 0.038446  | -0.015001 | -0.020973 | 0.031847  |
| 8  | -0.069582 | 0.026201  | 0.000109  | -0.001922 | 0.010361  | 0.012818  | -0.194716 | 0.238645  | -0.020786 | -0.011833 | -0.009414 | 0.002075  |
| 9  | 0.236785  | -0.189162 | 0.012600  | 0.009944  | -0.001084 | -0.000041 | 0.030702  | -0.068768 | -0.034253 | -0.018805 | -0.017152 | 0.001420  |
| 10 | -0.200944 | 0.241644  | -0.068085 | 0.032637  | 0.000317  | -0.000857 | 0.010933  | 0.012636  | -0.007500 | -0.003978 | -0.002298 | 0.002788  |
| 11 | 0.032522  | -0.070831 | 0.231312  | -0.192091 | 0.013593  | 0.009203  | -0.001720 | 0.000160  | -0.002571 | -0.000467 | 0.001294  | 0.002967  |
| 12 | 0.010571  | 0.012111  | -0.184758 | 0.227287  | -0.069196 | 0.029170  | -0.000248 | -0.001941 | 0.020003  | 0.009293  | -0.001126 | -0.000291 |
| 13 | -0.001208 | 0.000627  | 0.029087  | -0.067873 | 0.220748  | -0.183636 | 0.013209  | 0.009988  | 0.035546  | 0.013935  | -0.005856 | -0.000216 |
| 14 | -0.000787 | -0.001968 | 0.009157  | 0.012388  | -0.173351 | 0.220304  | -0.070368 | 0.029312  | 0.007552  | 0.004059  | 0.002576  | 0.001544  |
| 15 | 0.013202  | 0.011648  | -0.001022 | -0.000423 | 0.026546  | -0.066100 | 0.237374  | -0.195104 | 0.006555  | 0.005477  | 0.005462  | 0.002471  |
| 16 | 0.018185  | 0.175308  | -0.002488 | 0.002247  | 0.004355  | 0.004952  | -0.254552 | -0.007546 | 0.013427  | 0.004047  | 0.003583  | -0.000487 |
| 17 | 0.083582  | 0.072184  | 0.009545  | 0.011322  | 0.010346  | 0.009814  | 0.076759  | 0.083587  | -0.027920 | -0.014074 | -0.012472 | -0.000981 |
| 18 | -0.014371 | -0.246109 | 0.004556  | 0.004308  | 0.001442  | -0.002251 | 0.183008  | 0.012055  | 0.005907  | -0.000094 | -0.000218 | -0.001929 |
| 19 | -0.259302 | -0.004400 | 0.012959  | 0.184489  | -0.002782 | 0.001947  | 0.004151  | 0.005104  | -0.001325 | -0.003492 | -0.004144 | -0.002229 |
| 20 | 0.077099  | 0.082578  | 0.082527  | 0.076417  | 0.009748  | 0.010975  | 0.011394  | 0.010012  | -0.003871 | 0.000222  | 0.001699  | 0.002217  |

|    |           |           |           |           |           |           |           |           |           |           |           |           |
|----|-----------|-----------|-----------|-----------|-----------|-----------|-----------|-----------|-----------|-----------|-----------|-----------|
| 21 | 0.188327  | 0.009401  | -0.011357 | -0.254963 | 0.004281  | 0.004527  | 0.001064  | -0.002224 | 0.000392  | -0.002690 | -0.003142 | -0.002132 |
| 22 | 0.004332  | 0.004347  | -0.248260 | -0.018271 | 0.017590  | 0.180120  | -0.002259 | 0.001846  | -0.012444 | -0.007230 | -0.003259 | -0.001537 |
| 23 | 0.012213  | 0.010276  | 0.075421  | 0.086010  | 0.084517  | 0.077077  | 0.010067  | 0.010950  | 0.019624  | 0.006692  | -0.000097 | -0.000660 |
| 24 | 0.001772  | -0.002331 | 0.176034  | 0.021893  | -0.017200 | -0.248001 | 0.004768  | 0.004550  | -0.006461 | -0.006962 | -0.004151 | -0.002017 |
| 25 | -0.002680 | 0.001531  | 0.004132  | 0.004753  | -0.242408 | -0.021966 | 0.014952  | 0.180479  | -0.003366 | -0.005307 | -0.005614 | -0.002174 |
| 26 | 0.010962  | 0.010744  | 0.010875  | 0.010913  | 0.074911  | 0.085152  | 0.083498  | 0.074817  | 0.008419  | 0.007044  | 0.007835  | 0.002029  |
| 27 | 0.005062  | 0.004683  | 0.001612  | -0.002017 | 0.172774  | 0.023347  | -0.011405 | -0.252211 | -0.002597 | -0.004748 | -0.005204 | -0.001803 |
| 28 | 0.279325  | -0.391450 | 0.016142  | 0.028812  | 0.019159  | 0.024476  | 0.049777  | 0.044916  | -0.015911 | -0.010573 | -0.010284 | -0.002515 |
| 29 | -0.406007 | 0.289867  | 0.044386  | 0.051577  | 0.024556  | 0.020950  | 0.028228  | 0.016842  | -0.015724 | -0.010268 | -0.008882 | -0.000859 |
| 30 | 0.051904  | 0.044249  | 0.279801  | -0.396351 | 0.015719  | 0.026689  | 0.021090  | 0.024826  | -0.000986 | -0.000317 | -0.001191 | -0.000209 |
| 31 | 0.028112  | 0.015293  | -0.390630 | 0.272903  | 0.043134  | 0.051873  | 0.024339  | 0.019874  | -0.008442 | -0.006925 | -0.005487 | -0.002001 |
| 32 | 0.021554  | 0.024813  | 0.050927  | 0.045972  | 0.270106  | -0.389895 | 0.018363  | 0.026893  | 0.008670  | -0.000816 | -0.005749 | -0.001790 |
| 33 | 0.025233  | 0.019376  | 0.026290  | 0.019086  | -0.381833 | 0.267188  | 0.044511  | 0.049709  | 0.010210  | 0.001171  | -0.002537 | -0.000423 |
| 34 | 0.019072  | 0.025902  | 0.019757  | 0.025937  | 0.050069  | 0.044920  | 0.282028  | -0.397168 | 0.003459  | -0.000553 | -0.000016 | 0.000614  |
| 35 | 0.045943  | 0.046949  | 0.024250  | 0.020497  | 0.025769  | 0.016781  | -0.400187 | 0.286249  | 0.003911  | -0.001355 | -0.001646 | 0.000023  |
| 36 | -0.004575 | -0.004141 | -0.001140 | -0.000502 | -0.001515 | -0.000830 | 0.035165  | -0.031932 | 0.000415  | -0.000089 | -0.000007 | -0.000256 |
| 37 | -0.031019 | 0.032834  | -0.000982 | -0.001296 | -0.000723 | -0.000865 | -0.004432 | -0.004473 | -0.000254 | -0.000348 | -0.000238 | -0.000361 |
| 38 | 0.037471  | -0.033855 | -0.004691 | -0.004175 | -0.001170 | -0.000494 | -0.001723 | -0.000807 | -0.000253 | -0.000247 | -0.000128 | -0.000228 |
| 39 | -0.004614 | -0.004671 | -0.033037 | 0.035524  | -0.001136 | -0.001168 | -0.000961 | -0.000743 | 0.000141  | -0.000109 | 0.000026  | -0.000216 |
| 40 | -0.000952 | -0.001236 | 0.032477  | -0.029576 | -0.004510 | -0.004758 | -0.000764 | -0.000879 | -0.000092 | -0.000373 | 0.000128  | -0.000217 |
| 41 | -0.000881 | -0.000760 | -0.004607 | -0.004478 | -0.032573 | 0.035086  | -0.001101 | -0.001127 | -0.000041 | -0.000505 | 0.000080  | -0.000250 |
| 42 | -0.000774 | -0.000767 | -0.000959 | -0.001097 | 0.031615  | -0.028936 | -0.004311 | -0.004631 | 0.000206  | -0.000134 | 0.000041  | -0.000205 |
| 43 | -0.001123 | -0.001234 | -0.000848 | -0.000789 | -0.004471 | -0.004545 | -0.033070 | 0.035313  | 0.000043  | -0.000178 | -0.000043 | -0.000171 |
| 44 | 0.137720  | 0.142801  | 0.003758  | 0.003160  | 0.002738  | 0.002459  | 0.003563  | 0.003263  | -0.002244 | -0.001354 | -0.001063 | -0.000527 |
| 45 | 0.003117  | 0.003693  | 0.141362  | 0.140067  | 0.003451  | 0.003024  | 0.002516  | 0.002604  | -0.000299 | -0.000560 | 0.000104  | -0.000320 |
| 46 | 0.002443  | 0.002687  | 0.003267  | 0.003334  | 0.140587  | 0.139364  | 0.003435  | 0.003440  | 0.002568  | -0.000752 | 0.000116  | -0.000653 |
| 47 | 0.003917  | 0.003046  | 0.002783  | 0.002502  | 0.003479  | 0.003317  | 0.139822  | 0.142595  | 0.001402  | 0.000415  | 0.000631  | 0.000107  |
| 48 | -0.000658 | -0.000534 | -0.000278 | -0.001011 | -0.001322 | 0.000780  | 0.000336  | -0.000390 | -0.093662 | -0.197870 | -0.431855 | 0.064934  |
| 49 | 0.000342  | -0.000004 | -0.000469 | -0.000020 | -0.000015 | -0.000549 | -0.000423 | -0.000858 | 0.070292  | 0.865386  | 0.995735  | -0.270766 |
| 50 | 0.001988  | 0.000391  | 0.001001  | 0.000286  | 0.000821  | 0.000376  | -0.000479 | 0.000333  | 0.222176  | 1.446370  | 1.376730  | -0.128318 |
| 51 | -0.000197 | 0.000034  | -0.000574 | -0.000596 | -0.000387 | -0.000350 | -0.000753 | -0.000854 | 0.056243  | -0.740405 | -0.747449 | -0.233521 |
| 52 | -0.001673 | -0.000104 | -0.000711 | -0.000063 | -0.000284 | 0.000029  | 0.000444  | -0.000305 | -0.273114 | -1.186410 | -1.131660 | 0.891020  |
| 53 | 0.000114  | -0.000281 | -0.000055 | -0.000357 | -0.000849 | 0.000088  | 0.000121  | -0.000305 | -0.034510 | 0.093791  | 0.089574  | 0.056173  |
| 54 | -0.000083 | -0.000046 | -0.000138 | 0.000008  | 0.000018  | -0.000082 | -0.000019 | -0.000123 | 0.001569  | -0.039094 | -0.035725 | -0.089312 |
| 55 | 0.000097  | 0.000366  | -0.000093 | 0.000228  | 0.000037  | 0.000048  | 0.000264  | -0.000054 | 0.004553  | -0.032236 | -0.026267 | 0.043988  |
| 56 | -0.000160 | 0.000064  | -0.000063 | -0.000214 | 0.000010  | -0.000241 | -0.000670 | -0.000329 | 0.041601  | 0.040590  | 0.034026  | 0.032948  |
| 57 | -0.000088 | 0.000058  | -0.000057 | -0.000016 | -0.000013 | -0.000006 | -0.000067 | -0.000037 | 0.002811  | -0.001288 | 0.002166  | 0.006975  |
| 58 | 0.000034  | -0.000106 | 0.000039  | -0.000131 | -0.000083 | -0.000004 | -0.000062 | -0.000155 | -0.002119 | 0.003085  | 0.002663  | 0.004486  |
| 59 | -0.000132 | 0.000009  | -0.000147 | 0.000015  | -0.000175 | 0.000103  | -0.000119 | 0.000034  | -0.002843 | 0.002491  | 0.002153  | 0.004849  |
| 60 | 0.002545  | 0.002481  | 0.002497  | 0.003051  | 0.000330  | 0.000394  | 0.003203  | 0.002460  | 0.022757  | 0.003198  | 0.003323  | -0.001209 |
| 61 | -0.004168 | -0.008203 | 0.003815  | -0.003827 | -0.002307 | 0.000402  | -0.002063 | -0.002746 | 0.068634  | 0.066515  | 0.062935  | 0.006196  |
| 62 | -0.006098 | -0.003962 | -0.002869 | 0.002058  | -0.001340 | -0.003979 | 0.003442  | 0.002453  | -0.020439 | -0.019983 | -0.009994 | 0.001694  |
| 63 | -0.002829 | -0.001833 | 0.001186  | -0.001969 | -0.010328 | -0.005825 | 0.001108  | -0.003286 | -0.048591 | -0.026308 | -0.013763 | 0.000366  |
| 64 | 0.001561  | 0.000459  | -0.000900 | -0.000163 | -0.006658 | -0.010814 | -0.000295 | 0.002739  | 0.032604  | 0.043629  | 0.038779  | 0.005325  |
| 65 | 0.004659  | 0.002820  | -0.000924 | 0.001768  | 0.005607  | 0.005622  | 0.000958  | 0.002197  | -0.146230 | -0.050800 | -0.056351 | -0.024257 |
| 66 | -0.000380 | 0.002992  | -0.000251 | 0.001235  | 0.004859  | 0.007849  | 0.000260  | -0.001751 | -0.045203 | -0.051063 | -0.041584 | -0.011281 |
| 67 | 0.004842  | 0.007733  | -0.003464 | 0.006559  | 0.004801  | -0.000897 | -0.000657 | 0.001443  | 0.126732  | 0.010604  | 0.007273  | 0.017720  |
| 68 | 0.005651  | 0.002623  | 0.001916  | -0.003775 | 0.002635  | 0.004830  | -0.001155 | -0.002866 | 0.032281  | 0.027322  | 0.012688  | 0.004140  |
| 69 | -0.041401 | -0.035143 | 0.023079  | -0.017115 | 0.028837  | 0.031857  | -0.016657 | 0.024603  | -0.011929 | -0.006621 | -0.007383 | -0.001623 |
| 70 | -0.015445 | 0.024196  | -0.037438 | -0.039864 | 0.023232  | -0.014706 | 0.031746  | 0.030092  | -0.008556 | -0.003877 | -0.003894 | -0.000789 |

|     |           |           |           |           |           |           |           |           |           |           |           |           |
|-----|-----------|-----------|-----------|-----------|-----------|-----------|-----------|-----------|-----------|-----------|-----------|-----------|
| 71  | 0.034253  | 0.029450  | -0.015199 | 0.024682  | -0.035451 | -0.037948 | 0.023983  | -0.015884 | 0.007480  | 0.000682  | 0.000566  | 0.000707  |
| 72  | 0.023932  | -0.017021 | 0.029295  | 0.032814  | -0.014978 | 0.022371  | -0.039113 | -0.038883 | 0.010152  | 0.004023  | 0.003632  | 0.000476  |
| 73  | -0.079397 | 0.133270  | -0.019180 | -0.016511 | -0.025898 | -0.011660 | -0.214041 | -0.081372 | 0.004276  | 0.002266  | 0.002568  | 0.001206  |
| 74  | 0.087299  | 0.033788  | 0.007731  | 0.010855  | 0.011381  | 0.010471  | -0.124406 | 0.049406  | -0.011004 | -0.005061 | -0.004545 | 0.001119  |
| 75  | 0.046141  | -0.119524 | 0.010063  | 0.011944  | 0.010155  | 0.007991  | 0.034376  | 0.087208  | -0.009853 | -0.004212 | -0.003686 | 0.001269  |
| 76  | -0.083507 | -0.208780 | -0.010436 | -0.029712 | -0.015535 | -0.019538 | 0.139032  | -0.085055 | 0.004605  | -0.000674 | -0.000528 | 0.000193  |
| 77  | -0.217700 | -0.081162 | -0.081830 | 0.139449  | -0.018729 | -0.016684 | -0.028021 | -0.011303 | 0.001827  | -0.001114 | -0.001564 | -0.000517 |
| 78  | -0.127269 | 0.052009  | 0.086411  | 0.034696  | 0.007703  | 0.010650  | 0.012301  | 0.010427  | -0.002520 | 0.000169  | 0.000427  | 0.001571  |
| 79  | 0.034778  | 0.088080  | 0.047886  | -0.124068 | 0.010043  | 0.011808  | 0.010892  | 0.007846  | -0.004229 | -0.000793 | -0.000218 | 0.001468  |
| 80  | 0.143923  | -0.088184 | -0.084937 | -0.211303 | -0.009726 | -0.028244 | -0.017160 | -0.019784 | 0.005317  | 0.000036  | 0.000960  | -0.000251 |
| 81  | -0.029633 | -0.010375 | -0.209017 | -0.089407 | -0.080118 | 0.134311  | -0.020101 | -0.015524 | 0.003493  | 0.000898  | 0.000521  | 0.000179  |
| 82  | 0.012457  | 0.010020  | -0.118433 | 0.043468  | 0.087446  | 0.035927  | 0.008100  | 0.010111  | 0.008807  | 0.005405  | -0.000646 | 0.000573  |
| 83  | 0.011546  | 0.007633  | 0.035984  | 0.087340  | 0.045812  | -0.120387 | 0.010563  | 0.011354  | 0.008864  | 0.005399  | 0.000137  | 0.000730  |
| 84  | -0.017322 | -0.019520 | 0.131179  | -0.075748 | -0.091996 | -0.208324 | -0.011516 | -0.026934 | -0.000873 | -0.001773 | -0.005130 | -0.001011 |
| 85  | -0.021158 | -0.015733 | -0.027410 | -0.013303 | -0.199601 | -0.091606 | -0.081793 | 0.137333  | -0.001772 | -0.003212 | -0.004262 | -0.001856 |
| 86  | 0.008557  | 0.009972  | 0.011309  | 0.010750  | -0.116176 | 0.041379  | 0.087038  | 0.033523  | 0.003505  | 0.003705  | 0.003683  | 0.001704  |
| 87  | 0.011034  | 0.011207  | 0.010150  | 0.008281  | 0.035995  | 0.086304  | 0.047470  | -0.123540 | 0.005581  | 0.004452  | 0.003834  | 0.001506  |
| 88  | -0.013167 | -0.025170 | -0.015416 | -0.020888 | 0.127664  | -0.073817 | -0.082663 | -0.212317 | -0.008349 | -0.006194 | -0.006094 | -0.000781 |
| 89  | -0.516558 | -0.508018 | 0.002122  | 0.010322  | 0.001001  | 0.002143  | 0.008485  | 0.003152  | -0.003268 | -0.002281 | -0.002214 | -0.000628 |
| 90  | 0.009715  | 0.002932  | -0.510226 | -0.517744 | 0.002273  | 0.010744  | 0.001082  | 0.001670  | -0.001972 | -0.001122 | -0.001680 | -0.000511 |
| 91  | 0.001736  | 0.001365  | 0.009047  | 0.003780  | -0.511225 | -0.518019 | 0.003298  | 0.009053  | 0.000322  | -0.000570 | -0.001280 | -0.000180 |
| 92  | 0.003334  | 0.008450  | 0.000772  | 0.001954  | 0.008613  | 0.003944  | -0.515710 | -0.512641 | 0.002797  | 0.000097  | 0.000001  | -0.000108 |
| 93  | -0.040747 | -0.014536 | -0.004774 | -0.006015 | -0.006340 | -0.005683 | 0.046072  | -0.011169 | 0.006159  | 0.002669  | 0.002425  | -0.000637 |
| 94  | -0.046564 | -0.019233 | -0.002958 | -0.004834 | -0.005037 | -0.004789 | 0.078322  | -0.038246 | 0.004829  | 0.002384  | 0.002112  | -0.000484 |
| 95  | -0.035891 | 0.075393  | -0.004603 | -0.005358 | -0.004446 | -0.003122 | -0.019595 | -0.046506 | 0.004343  | 0.001983  | 0.001710  | -0.000545 |
| 96  | -0.010153 | 0.044341  | -0.005512 | -0.006597 | -0.005664 | -0.004885 | -0.014769 | -0.040729 | 0.005400  | 0.002173  | 0.001924  | -0.000744 |
| 97  | 0.046923  | -0.011789 | -0.040230 | -0.014879 | -0.004825 | -0.005808 | -0.006851 | -0.005633 | 0.001065  | -0.000359 | -0.000503 | -0.000957 |
| 98  | 0.080400  | -0.040199 | -0.046215 | -0.019822 | -0.002877 | -0.004833 | -0.005459 | -0.004800 | 0.001434  | 0.000151  | 0.000030  | -0.000618 |
| 99  | -0.019751 | -0.047084 | -0.037608 | 0.079095  | -0.004588 | -0.005310 | -0.004886 | -0.003024 | 0.001962  | 0.000596  | 0.000302  | -0.000593 |
| 100 | -0.014986 | -0.041027 | -0.010213 | 0.045022  | -0.005468 | -0.006520 | -0.006019 | -0.004832 | 0.002363  | 0.000310  | 0.000055  | -0.000867 |
| 101 | -0.006671 | -0.005688 | 0.044737  | -0.009621 | -0.040704 | -0.015948 | -0.004828 | -0.005852 | -0.004881 | -0.003072 | 0.000110  | -0.000398 |
| 102 | -0.005786 | -0.004344 | 0.073858  | -0.033719 | -0.046725 | -0.019820 | -0.003314 | -0.004246 | -0.003998 | -0.002338 | 0.000516  | -0.000164 |
| 103 | -0.005287 | -0.002831 | -0.020393 | -0.046590 | -0.035785 | 0.076083  | -0.004918 | -0.004931 | -0.003982 | -0.002268 | 0.000011  | -0.000245 |
| 104 | -0.006258 | -0.004803 | -0.015592 | -0.040779 | -0.010062 | 0.044255  | -0.005637 | -0.006413 | -0.004881 | -0.003126 | -0.000146 | -0.000480 |
| 105 | -0.005113 | -0.005721 | -0.006228 | -0.005973 | 0.044406  | -0.009333 | -0.040549 | -0.014761 | -0.001828 | -0.002199 | -0.002127 | -0.001003 |
| 106 | -0.003450 | -0.004253 | -0.005084 | -0.004780 | 0.071855  | -0.032016 | -0.046446 | -0.018842 | -0.001684 | -0.001546 | -0.001613 | -0.000705 |
| 107 | -0.005096 | -0.005002 | -0.004545 | -0.003249 | -0.020400 | -0.045966 | -0.037496 | 0.078399  | -0.002693 | -0.001873 | -0.001539 | -0.000597 |
| 108 | -0.005933 | -0.006225 | -0.005618 | -0.005059 | -0.015695 | -0.040195 | -0.009910 | 0.045274  | -0.002896 | -0.002504 | -0.002194 | -0.000901 |
| 109 | 1.033241  | -0.317098 | -0.004195 | -0.005425 | -0.001227 | -0.000531 | -0.004613 | 0.001446  | 0.003294  | 0.002242  | 0.001784  | 0.000505  |
| 110 | -0.317098 | 1.025786  | 0.002068  | -0.004929 | 0.000266  | -0.001617 | -0.003879 | -0.004593 | 0.000030  | 0.000056  | 0.000452  | 0.000122  |
| 111 | -0.004195 | 0.002068  | 1.014003  | -0.303356 | -0.003019 | -0.006043 | -0.000856 | 0.000085  | 0.002123  | 0.001475  | 0.000893  | 0.000491  |
| 112 | -0.005425 | -0.004929 | -0.303356 | 1.020272  | 0.000820  | -0.004587 | -0.000301 | -0.001750 | -0.000148 | -0.000264 | 0.000882  | 0.000038  |
| 113 | -0.001227 | 0.000266  | -0.003019 | 0.000820  | 1.005802  | -0.294095 | -0.003418 | -0.005144 | 0.000672  | 0.000128  | 0.001184  | 0.000021  |
| 114 | -0.000531 | -0.001617 | -0.006043 | -0.004587 | -0.294095 | 1.011911  | 0.000161  | -0.003952 | -0.001008 | 0.000392  | 0.000063  | 0.000133  |
| 115 | -0.004613 | -0.003879 | -0.000856 | -0.000301 | -0.003418 | 0.000161  | 1.030104  | -0.315233 | -0.002086 | -0.000267 | -0.000437 | 0.000050  |
| 116 | 0.001446  | -0.004593 | 0.000085  | -0.001750 | -0.005144 | -0.003952 | -0.315233 | 1.028513  | -0.000727 | 0.000205  | 0.000499  | 0.000050  |
| 117 | 0.003294  | 0.000030  | 0.002123  | -0.000148 | 0.000672  | -0.001008 | -0.002086 | -0.000727 | 1.280976  | 0.250157  | 0.238359  | 0.045009  |
| 118 | 0.002242  | 0.000056  | 0.001475  | -0.000264 | 0.000128  | 0.000392  | -0.000267 | 0.000205  | 0.250157  | 1.951720  | 1.440860  | 0.346048  |
| 119 | 0.001784  | 0.000452  | 0.000893  | 0.000882  | 0.001184  | 0.000063  | -0.000437 | 0.000499  | 0.238359  | 1.440860  | 1.838060  | 0.297569  |
| 120 | 0.000505  | 0.000122  | 0.000491  | 0.000038  | 0.000021  | 0.000133  | 0.000050  | 0.000050  | 0.045009  | 0.346048  | 0.297569  | 0.929576  |

|     |           |           |           |           |           |           |           |           |           |           |           |           |
|-----|-----------|-----------|-----------|-----------|-----------|-----------|-----------|-----------|-----------|-----------|-----------|-----------|
| 121 | -0.000280 | -0.000071 | -0.000303 | -0.000029 | -0.000021 | -0.000133 | -0.000076 | -0.000086 | -0.018257 | -0.196404 | -0.176821 | -0.445445 |
| 122 | -0.000224 | -0.000050 | -0.000186 | -0.000013 | 0.000001  | -0.000001 | 0.000029  | 0.000033  | -0.026920 | -0.149717 | -0.120832 | -0.484134 |
| 123 | 0.000387  | -0.000106 | 0.000542  | -0.000027 | 0.000211  | 0.000463  | -0.000040 | 0.000423  | 0.031958  | 0.323247  | 0.235693  | 0.013713  |
| 124 | -0.000150 | -0.000018 | -0.000298 | 0.000040  | -0.000084 | -0.000238 | -0.000027 | -0.000166 | -0.018514 | -0.117634 | -0.061104 | 0.004665  |
| 125 | -0.000238 | 0.000122  | -0.000248 | -0.000009 | -0.000128 | -0.000224 | 0.000062  | -0.000251 | -0.013160 | -0.205504 | -0.174472 | -0.018367 |
| 126 | 0.002170  | 0.000545  | 0.001172  | 0.000369  | 0.000954  | 0.000170  | -0.000545 | 0.000833  | 0.207555  | 0.742463  | 0.702375  | 0.249955  |
| 127 | 0.000921  | 0.000118  | 0.001002  | 0.000250  | 0.000802  | 0.000277  | -0.000496 | 0.000192  | 0.182725  | 0.791644  | 0.726443  | 0.314836  |
| 128 | 0.000046  | 0.000117  | 0.000026  | 0.000050  | 0.000049  | 0.000014  | 0.000019  | 0.000021  | 0.006564  | 0.016936  | 0.023877  | 0.012824  |
| 129 | 0.000075  | -0.000179 | 0.000093  | -0.000125 | 0.000034  | -0.000151 | 0.000146  | -0.000278 | -0.003279 | -0.011603 | -0.013458 | 0.002309  |
| 130 | -0.000130 | 0.000084  | -0.000197 | 0.000008  | -0.000148 | 0.000109  | -0.000185 | 0.000092  | -0.002624 | -0.010259 | -0.012126 | 0.002700  |
| 131 | -0.000025 | 0.000115  | 0.000015  | 0.000014  | -0.000003 | 0.000072  | -0.000091 | 0.000042  | 0.000428  | 0.002289  | 0.001072  | -0.006330 |
| 132 | -0.000041 | -0.000069 | 0.000027  | 0.000033  | 0.000069  | -0.000053 | 0.000019  | 0.000083  | -0.001694 | 0.001234  | 0.000031  | -0.006260 |
| 133 | 0.000075  | -0.000065 | 0.000039  | 0.000022  | 0.000001  | 0.000010  | 0.000091  | 0.000044  | 0.000692  | 0.001845  | 0.001090  | -0.005455 |
| 134 | -0.010086 | -0.016604 | -0.000792 | 0.003318  | 0.003436  | -0.000881 | 0.006667  | 0.007892  | -0.021161 | -0.004510 | -0.003662 | 0.000898  |
| 135 | -0.011502 | 0.000517  | -0.000095 | 0.002428  | 0.000535  | -0.004738 | 0.018342  | -0.018476 | 0.003180  | 0.003014  | 0.002845  | 0.000700  |
| 136 | -0.005239 | 0.007756  | -0.000493 | 0.002320  | 0.001753  | -0.000450 | -0.005401 | -0.003549 | -0.006786 | -0.003415 | -0.003464 | -0.000868 |
| 137 | 0.003049  | 0.008728  | -0.001955 | -0.000530 | 0.001516  | -0.000639 | 0.000094  | -0.001846 | -0.003860 | -0.001975 | -0.001860 | -0.000719 |
| 138 | -0.026444 | -0.000892 | -0.002212 | 0.001176  | 0.001255  | -0.000251 | 0.008065  | -0.000431 | 0.016426  | 0.010501  | 0.011140  | 0.002228  |
| 139 | -0.012282 | -0.014984 | -0.000385 | 0.007556  | 0.000180  | 0.001656  | -0.001841 | -0.001672 | -0.007898 | -0.003368 | -0.002469 | 0.001250  |
| 140 | -0.021452 | 0.019461  | -0.000619 | 0.003410  | 0.001039  | 0.001359  | 0.000173  | 0.000224  | 0.001519  | 0.000311  | 0.000528  | 0.000630  |
| 141 | 0.006753  | 0.002418  | -0.004267 | -0.000701 | 0.000108  | 0.001072  | -0.001178 | -0.000704 | -0.002498 | -0.004567 | -0.005323 | -0.000526 |
| 142 | -0.001903 | 0.002209  | -0.003084 | -0.003404 | 0.000735  | 0.001213  | 0.000761  | 0.000547  | -0.005052 | -0.005896 | -0.007295 | -0.000425 |
| 143 | -0.012472 | -0.001859 | -0.012900 | 0.028785  | -0.001138 | -0.001788 | 0.001407  | -0.000111 | -0.003422 | -0.003204 | -0.004110 | 0.000170  |
| 144 | -0.002241 | -0.000155 | 0.009762  | -0.013091 | -0.025988 | -0.013605 | 0.001885  | -0.003405 | 0.027878  | 0.013916  | 0.009717  | 0.001460  |
| 145 | -0.002666 | -0.000116 | 0.008737  | 0.023578  | -0.003747 | -0.016659 | 0.003208  | -0.000230 | -0.000981 | 0.001206  | 0.002022  | -0.000302 |
| 146 | 0.000170  | 0.000464  | -0.005987 | -0.002935 | 0.000642  | -0.003907 | 0.001234  | -0.000218 | 0.002072  | 0.000230  | 0.000516  | -0.000296 |
| 147 | -0.000177 | 0.000112  | 0.000147  | 0.004652  | 0.005552  | 0.007284  | -0.001254 | -0.001562 | -0.000093 | -0.000752 | -0.000230 | -0.000795 |
| 148 | -0.000040 | 0.001386  | 0.000999  | 0.004626  | 0.019660  | -0.008615 | 0.003095  | -0.001267 | -0.008997 | -0.001162 | 0.002128  | -0.001372 |
| 149 | -0.003484 | -0.000539 | -0.000715 | 0.000151  | -0.017527 | -0.017156 | 0.000100  | 0.014860  | 0.006545  | 0.000916  | -0.000398 | 0.001394  |
| 150 | -0.001042 | 0.000033  | 0.000571  | 0.000431  | 0.007509  | -0.020182 | 0.007229  | -0.002555 | 0.000794  | -0.000833 | -0.001356 | 0.000251  |
| 151 | -0.000702 | -0.000165 | -0.000293 | -0.000284 | 0.008745  | 0.002822  | 0.003953  | -0.008088 | -0.000733 | -0.003944 | -0.005609 | -0.000328 |
| 152 | -0.000150 | 0.001179  | 0.000772  | 0.001530  | 0.005681  | -0.007201 | -0.003171 | -0.008040 | 0.000439  | -0.004066 | -0.005497 | -0.000363 |
| 153 | -0.003570 | 0.000136  | 0.000967  | 0.002442  | -0.005194 | -0.010941 | 0.028613  | 0.000374  | 0.002914  | -0.000794 | -0.001956 | 0.000135  |
| 154 | -0.014959 | 0.039164  | -0.000266 | -0.001715 | 0.001985  | -0.000248 | -0.000465 | 0.000184  | 0.002837  | 0.000893  | 0.001077  | -0.000043 |
| 155 | -0.002515 | -0.001973 | -0.022203 | 0.013536  | -0.002060 | -0.003055 | 0.002153  | -0.000101 | -0.000095 | -0.002548 | -0.002731 | -0.000528 |
| 156 | -0.001353 | 0.000861  | -0.000961 | 0.000770  | 0.034615  | -0.007932 | 0.002492  | -0.002802 | -0.000871 | -0.003101 | -0.002000 | -0.001596 |
| 157 | -0.005505 | 0.000911  | -0.000005 | 0.003250  | -0.001543 | -0.005011 | 0.019336  | -0.030004 | 0.000562  | -0.001167 | -0.002111 | 0.000247  |
| 158 | -0.000119 | 0.000365  | -0.000388 | 0.000239  | -0.000071 | 0.000120  | -0.000036 | 0.000022  | -0.017246 | -0.011629 | -0.009837 | -0.001466 |
| 159 | -0.000191 | -0.000193 | -0.000589 | 0.000929  | -0.000238 | 0.000353  | -0.000782 | 0.000809  | 0.047091  | 0.020959  | 0.024055  | 0.001892  |
| 160 | -0.000074 | -0.000282 | -0.000488 | 0.000554  | -0.000099 | 0.000189  | -0.000704 | 0.000654  | 0.037905  | 0.013573  | 0.014980  | 0.001360  |
| 161 | -0.000052 | -0.000010 | -0.000111 | -0.000027 | -0.000364 | 0.000123  | -0.000098 | 0.000309  | -0.006485 | -0.000628 | -0.002043 | 0.000545  |
| 162 | 0.000354  | -0.000361 | 0.001102  | 0.001403  | -0.000225 | 0.000015  | -0.001488 | -0.001096 | 0.000843  | 0.000113  | 0.000357  | 0.000068  |
| 163 | 0.001235  | -0.000796 | 0.000396  | -0.001159 | -0.000296 | 0.000337  | -0.001241 | 0.000719  | 0.034570  | 0.032472  | 0.026238  | 0.002127  |
| 164 | -0.000078 | 0.000521  | -0.000330 | 0.003389  | 0.003228  | -0.000939 | -0.017528 | 0.003116  | -0.010526 | -0.005322 | -0.005679 | -0.001268 |
| 165 | 0.008326  | -0.010116 | -0.000125 | -0.001121 | -0.000458 | -0.001128 | 0.012586  | -0.009167 | -0.001117 | -0.000872 | -0.000976 | -0.000240 |
| 166 | -0.005597 | -0.013801 | 0.002714  | -0.000307 | -0.003100 | -0.000079 | 0.014236  | -0.006046 | 0.002668  | 0.001309  | 0.001240  | 0.000590  |
| 167 | 0.025141  | -0.004732 | 0.002374  | -0.012142 | 0.000906  | 0.002407  | -0.001345 | -0.001031 | -0.003922 | -0.007264 | -0.008677 | -0.000710 |
| 168 | -0.007855 | 0.009938  | 0.008639  | -0.009326 | 0.001141  | 0.001181  | 0.001167  | 0.000934  | -0.000167 | 0.000221  | 0.000211  | 0.000151  |
| 169 | -0.007238 | 0.006211  | -0.003878 | 0.018244  | -0.001146 | -0.001336 | -0.001072 | -0.000272 | 0.008127  | 0.009661  | 0.012065  | 0.000813  |
| 170 | -0.000930 | -0.002296 | -0.011435 | 0.009559  | 0.003712  | -0.007728 | -0.002122 | 0.000217  | -0.001328 | 0.004171  | 0.004160  | 0.001486  |

|     |           |           |           |           |           |           |           |           |           |           |           |           |
|-----|-----------|-----------|-----------|-----------|-----------|-----------|-----------|-----------|-----------|-----------|-----------|-----------|
| 171 | -0.000170 | -0.000757 | 0.006659  | 0.011910  | -0.001907 | 0.004391  | -0.002059 | -0.000277 | -0.003183 | -0.001044 | -0.000977 | 0.000040  |
| 172 | 0.000876  | -0.001087 | 0.005154  | 0.003184  | 0.003106  | -0.023653 | 0.000832  | 0.002435  | -0.002407 | -0.000590 | -0.000306 | 0.000885  |
| 173 | -0.000455 | 0.000032  | 0.000094  | -0.000418 | 0.011162  | 0.005345  | -0.002014 | -0.006514 | -0.000790 | -0.006210 | -0.009046 | -0.000297 |
| 174 | 0.000360  | 0.000485  | 0.000146  | 0.000141  | 0.007202  | -0.007384 | -0.008443 | 0.004895  | -0.000379 | -0.000232 | -0.000011 | -0.000020 |
| 175 | 0.000714  | -0.001479 | -0.001074 | -0.002530 | 0.000292  | 0.003320  | 0.006785  | 0.004976  | -0.000618 | 0.006465  | 0.009084  | 0.000387  |
| 176 | -0.010896 | 0.050859  | -0.002593 | -0.007415 | -0.001590 | 0.001996  | -0.000794 | 0.000495  | 0.005499  | 0.002007  | 0.001465  | 0.001114  |
| 177 | 0.018245  | -0.042370 | 0.002138  | -0.006005 | 0.000118  | -0.002046 | 0.002291  | 0.000498  | -0.006225 | -0.003446 | -0.004659 | -0.000422 |
| 178 | -0.012118 | -0.001245 | -0.038670 | 0.023914  | 0.000855  | -0.000145 | 0.000383  | 0.001018  | -0.009132 | -0.003435 | -0.003938 | 0.000480  |
| 179 | -0.005905 | -0.001779 | 0.029455  | -0.009903 | 0.001894  | 0.003612  | -0.002172 | -0.001950 | 0.002648  | 0.003035  | 0.007177  | 0.000231  |
| 180 | 0.001929  | -0.000750 | 0.004334  | 0.005725  | 0.037314  | -0.010840 | -0.005932 | -0.000589 | -0.000458 | 0.000519  | -0.002410 | 0.000208  |
| 181 | -0.000318 | 0.002149  | 0.004258  | 0.005358  | -0.042171 | 0.005474  | -0.007461 | 0.005786  | 0.004249  | -0.000297 | -0.000132 | -0.000450 |
| 182 | 0.006421  | 0.003889  | 0.001619  | 0.001138  | 0.003222  | -0.012149 | 0.013954  | -0.042938 | 0.003006  | 0.000359  | 0.000810  | -0.000228 |
| 183 | 0.011607  | 0.004323  | -0.001718 | -0.002306 | 0.001507  | -0.003856 | -0.033301 | 0.046509  | 0.002434  | 0.002044  | 0.002445  | -0.000796 |
| 184 | -0.000426 | 0.000001  | -0.000284 | 0.000425  | -0.000222 | 0.000391  | -0.000813 | 0.000842  | 0.043959  | 0.028039  | 0.024176  | 0.004320  |
| 185 | -0.000283 | -0.000334 | -0.000587 | 0.001103  | -0.000234 | 0.000287  | -0.000712 | 0.000769  | 0.066533  | 0.026800  | 0.031338  | 0.003513  |
| 186 | 0.000364  | -0.000036 | 0.000049  | -0.000227 | 0.000403  | -0.000179 | 0.000144  | -0.000388 | -0.005940 | -0.007606 | -0.007843 | -0.001614 |
| 187 | -0.000412 | 0.000731  | 0.000367  | -0.000559 | -0.000310 | 0.000035  | 0.000614  | -0.000362 | -0.071322 | -0.028817 | -0.031116 | -0.004231 |
| 188 | 0.000778  | -0.000321 | 0.000480  | -0.000763 | 0.000362  | -0.000536 | 0.000769  | -0.000878 | -0.028258 | -0.004856 | -0.004703 | -0.000993 |
| 189 | 0.000069  | -0.000121 | -0.000007 | 0.000007  | -0.000019 | 0.000005  | -0.000014 | 0.000003  | 0.001013  | -0.000324 | -0.000379 | -0.000534 |
| 190 | -0.005377 | 0.013741  | 0.000973  | 0.000437  | 0.000380  | -0.000345 | 0.000949  | 0.000449  | -0.002036 | -0.001185 | -0.000974 | -0.000441 |
| 191 | 0.010949  | 0.002413  | 0.000845  | -0.000662 | 0.000784  | -0.000534 | 0.001310  | -0.000178 | -0.001853 | -0.000768 | -0.000575 | -0.000482 |
| 192 | -0.009738 | 0.005240  | -0.000252 | 0.000387  | -0.000182 | 0.000109  | -0.000244 | 0.000022  | 0.001061  | 0.000639  | 0.000595  | 0.000170  |
| 193 | 0.013181  | -0.016462 | -0.000358 | 0.000208  | -0.000512 | 0.000332  | -0.000214 | 0.000098  | -0.000090 | -0.000129 | -0.000084 | -0.000032 |
| 194 | -0.005913 | 0.018136  | 0.000478  | 0.000067  | 0.000341  | 0.000092  | 0.000656  | 0.000262  | 0.000034  | 0.000039  | 0.000215  | -0.000205 |
| 195 | 0.013450  | -0.004917 | -0.000186 | 0.001172  | -0.000699 | 0.000571  | -0.000422 | 0.001094  | 0.001347  | 0.000632  | 0.000694  | 0.000045  |
| 196 | 0.005712  | -0.001080 | 0.000284  | 0.000051  | 0.000138  | -0.000053 | 0.000022  | -0.000034 | -0.000502 | -0.000434 | -0.000353 | -0.000119 |
| 197 | 0.002608  | 0.000585  | -0.000003 | 0.000035  | -0.000054 | 0.000116  | -0.000046 | 0.000045  | -0.000044 | -0.000036 | 0.000066  | -0.000189 |
| 198 | 0.000244  | 0.000629  | -0.000082 | -0.000070 | -0.000055 | 0.000026  | 0.000030  | -0.000126 | 0.000289  | 0.000154  | 0.000208  | -0.000048 |
| 199 | 0.000977  | 0.001994  | -0.000042 | 0.000052  | -0.000015 | 0.000075  | -0.000048 | 0.000055  | 0.000178  | 0.000089  | 0.000155  | -0.000034 |
| 200 | 0.000811  | 0.003047  | 0.000031  | -0.000052 | -0.000010 | 0.000132  | 0.000107  | 0.000325  | -0.000169 | -0.000054 | -0.000079 | 0.000080  |
| 201 | 0.000823  | 0.000827  | 0.013529  | -0.005881 | 0.000630  | 0.000499  | 0.000005  | 0.000148  | -0.000417 | -0.000212 | -0.000053 | -0.000099 |
| 202 | 0.000028  | 0.000353  | -0.003436 | 0.016311  | 0.000335  | 0.000387  | 0.000043  | 0.000292  | -0.000265 | -0.000166 | -0.000032 | -0.000183 |
| 203 | -0.000194 | 0.000142  | 0.008153  | -0.011956 | -0.000125 | 0.000235  | -0.000371 | 0.000372  | -0.000511 | -0.000139 | -0.000316 | -0.000007 |
| 204 | -0.000266 | -0.000072 | -0.010284 | 0.006396  | -0.000192 | 0.000401  | -0.000294 | 0.000153  | -0.000106 | 0.000126  | -0.000016 | 0.000084  |
| 205 | 0.001071  | -0.000192 | 0.011460  | 0.001286  | 0.000394  | -0.000031 | 0.000501  | -0.000265 | 0.001425  | 0.000429  | 0.000846  | -0.000149 |
| 206 | 0.000729  | 0.000106  | -0.000278 | 0.008668  | 0.000610  | 0.000172  | 0.000156  | -0.000290 | 0.000111  | -0.000253 | -0.000162 | -0.000173 |
| 207 | 0.000335  | 0.000136  | 0.000392  | 0.003907  | 0.000085  | -0.000075 | 0.000046  | 0.000084  | -0.000171 | 0.000019  | -0.000079 | 0.000077  |
| 208 | -0.000065 | 0.000059  | 0.001270  | 0.001746  | 0.000027  | 0.000021  | -0.000029 | 0.000109  | -0.000055 | -0.000001 | 0.000065  | -0.000060 |
| 209 | -0.000050 | -0.000068 | 0.000423  | 0.000506  | -0.000019 | -0.000104 | -0.000019 | -0.000013 | 0.000004  | 0.000016  | 0.000061  | -0.000042 |
| 210 | -0.000046 | 0.000031  | 0.002644  | 0.000529  | 0.000024  | 0.000013  | -0.000071 | 0.000124  | 0.000223  | 0.000029  | 0.000218  | -0.000125 |
| 211 | 0.000160  | -0.000153 | 0.003255  | 0.001171  | 0.000250  | 0.000130  | 0.000108  | 0.000007  | -0.000103 | 0.000134  | -0.000120 | 0.000029  |
| 212 | 0.000218  | -0.000240 | 0.000944  | 0.000047  | -0.001507 | 0.009116  | 0.000747  | 0.000218  | -0.000615 | -0.000045 | 0.000148  | -0.000001 |
| 213 | 0.000579  | -0.000186 | 0.000799  | 0.000154  | 0.011718  | 0.000678  | 0.000379  | -0.000067 | -0.000579 | -0.000230 | 0.000118  | -0.000146 |
| 214 | -0.000211 | 0.000055  | -0.000337 | 0.000003  | -0.010419 | 0.006950  | -0.000275 | 0.000293  | -0.000268 | 0.000068  | -0.000100 | 0.000039  |
| 215 | -0.000440 | 0.000406  | -0.000187 | 0.000188  | 0.007426  | -0.011790 | 0.000011  | 0.000138  | -0.000283 | 0.000681  | 0.000278  | 0.000299  |
| 216 | -0.000090 | 0.000417  | 0.000141  | 0.000300  | -0.003002 | 0.016131  | 0.000447  | 0.000415  | 0.000627  | 0.000412  | 0.000678  | -0.000052 |
| 217 | -0.000059 | 0.000068  | 0.000753  | 0.000690  | 0.012868  | -0.004969 | 0.000448  | 0.000651  | 0.001711  | -0.000269 | -0.000408 | -0.000357 |
| 218 | 0.000074  | 0.000075  | 0.000077  | 0.000034  | 0.002799  | 0.000799  | 0.000319  | 0.000065  | -0.000080 | 0.000168  | -0.000056 | 0.000114  |
| 219 | -0.000075 | 0.000156  | -0.000081 | 0.000086  | 0.002575  | 0.000412  | 0.000087  | -0.000038 | -0.000071 | 0.000061  | 0.000102  | -0.000023 |
| 220 | -0.000022 | -0.000003 | -0.000087 | -0.000035 | 0.000355  | 0.000543  | -0.000027 | -0.000117 | -0.000079 | 0.000104  | 0.000104  | 0.000002  |



|     |           |           |           |           |           |           |           |           |           |           |           |           |
|-----|-----------|-----------|-----------|-----------|-----------|-----------|-----------|-----------|-----------|-----------|-----------|-----------|
| 221 | -0.000031 | 0.000104  | -0.000048 | 0.000054  | 0.001208  | 0.001917  | 0.000036  | -0.000017 | 0.000336  | 0.000061  | 0.000284  | -0.000080 |
| 222 | 0.000064  | 0.000083  | 0.000355  | 0.000179  | 0.000176  | 0.004493  | 0.000095  | -0.000120 | 0.000165  | 0.000185  | -0.000158 | -0.000027 |
| 223 | 0.000141  | 0.000864  | -0.000546 | 0.000363  | 0.000218  | 0.000537  | 0.011667  | -0.002173 | -0.000519 | -0.000456 | -0.000226 | -0.000151 |
| 224 | 0.000458  | 0.000266  | 0.000278  | 0.000144  | 0.000577  | 0.000188  | -0.006437 | 0.019445  | 0.000195  | 0.000023  | 0.000126  | -0.000291 |
| 225 | -0.000293 | 0.000171  | -0.000319 | 0.000191  | -0.000084 | -0.000011 | 0.010342  | -0.014419 | -0.000431 | -0.000067 | -0.000168 | -0.000028 |
| 226 | 0.000092  | -0.000045 | 0.000084  | -0.000189 | 0.000054  | -0.000015 | -0.012652 | 0.008790  | -0.000072 | -0.000133 | -0.000070 | -0.000031 |
| 227 | 0.000615  | -0.000092 | 0.000309  | 0.000091  | 0.000591  | 0.000297  | 0.015426  | -0.002801 | 0.000297  | 0.000077  | 0.000362  | -0.000245 |
| 228 | 0.000637  | 0.000948  | -0.000041 | 0.000047  | 0.000521  | 0.000475  | -0.001539 | 0.010007  | -0.000789 | -0.000273 | -0.000346 | -0.000165 |
| 229 | -0.000092 | 0.000176  | -0.000122 | 0.000247  | 0.000186  | 0.000267  | 0.000292  | 0.003431  | -0.000463 | -0.000405 | -0.000386 | 0.000016  |
| 230 | -0.000002 | 0.000033  | -0.000053 | 0.000103  | -0.000069 | 0.000046  | 0.001107  | 0.002078  | 0.000154  | 0.000034  | 0.000161  | -0.000182 |
| 231 | -0.000006 | -0.000110 | -0.000037 | 0.000013  | -0.000078 | -0.000041 | 0.000314  | 0.000633  | 0.000047  | 0.000059  | 0.000114  | -0.000084 |
| 232 | 0.000067  | 0.000002  | 0.000015  | 0.000065  | -0.000054 | 0.000083  | 0.002206  | 0.000838  | 0.000002  | 0.000009  | 0.000055  | -0.000066 |
| 233 | 0.000147  | 0.000255  | 0.000052  | 0.000055  | 0.000014  | -0.000042 | 0.004974  | -0.000957 | -0.000408 | -0.000161 | -0.000228 | 0.000062  |
| 234 | 0.029762  | 0.000540  | 0.000251  | 0.001903  | -0.000799 | 0.001771  | -0.000599 | 0.001172  | 0.002215  | 0.001104  | 0.001459  | -0.000181 |
| 235 | -0.009773 | 0.038617  | 0.001739  | -0.000181 | 0.001938  | -0.000917 | 0.002280  | 0.000595  | -0.004713 | -0.002864 | -0.002335 | -0.001174 |
| 236 | -0.014819 | -0.002143 | -0.000055 | -0.000849 | 0.000269  | -0.000887 | 0.000061  | -0.000765 | -0.000017 | 0.000130  | -0.000185 | 0.000420  |
| 237 | -0.013245 | -0.004331 | -0.000290 | -0.001013 | -0.000057 | -0.000637 | -0.000043 | -0.000577 | 0.000861  | 0.000963  | 0.000650  | 0.000407  |
| 238 | 0.009255  | -0.007965 | -0.000218 | 0.000320  | -0.000197 | 0.000268  | -0.000237 | 0.000053  | -0.000499 | -0.000465 | -0.000376 | -0.000169 |
| 239 | 0.005345  | -0.007415 | -0.000224 | 0.000220  | -0.000263 | 0.000226  | -0.000280 | -0.000016 | -0.000221 | -0.000265 | -0.000251 | 0.000026  |
| 240 | 0.001794  | 0.004095  | 0.000186  | 0.000049  | 0.000140  | 0.000119  | 0.000199  | 0.000106  | -0.000050 | 0.000024  | 0.000121  | -0.000170 |
| 241 | 0.001678  | 0.004284  | 0.000234  | 0.000037  | 0.000176  | 0.000090  | 0.000214  | 0.000068  | -0.000227 | -0.000111 | -0.000004 | -0.000199 |
| 242 | -0.006051 | 0.003540  | -0.000051 | -0.000248 | 0.000146  | -0.000163 | 0.000065  | -0.000172 | 0.000442  | 0.000299  | 0.000220  | 0.000190  |
| 243 | -0.006433 | 0.007133  | 0.000024  | -0.000160 | 0.000193  | -0.000073 | 0.000091  | -0.000091 | 0.000436  | 0.000314  | 0.000271  | 0.000139  |
| 244 | 0.001246  | -0.018252 | -0.000751 | -0.000081 | -0.000722 | 0.000024  | -0.000901 | -0.000312 | 0.000970  | 0.000393  | 0.000241  | 0.000258  |
| 245 | 0.001431  | -0.018290 | -0.000844 | 0.000005  | -0.000822 | 0.000178  | -0.000858 | -0.000065 | 0.000795  | 0.000475  | 0.000185  | 0.000450  |
| 246 | 0.001447  | 0.000423  | 0.007665  | 0.021419  | 0.000223  | 0.000217  | 0.000874  | -0.000438 | 0.003329  | 0.000107  | 0.001942  | -0.000835 |
| 247 | 0.000378  | 0.001236  | 0.026822  | 0.002128  | 0.001463  | 0.001060  | 0.000295  | 0.001109  | -0.001349 | -0.000383 | -0.000339 | -0.000305 |
| 248 | -0.000407 | -0.000148 | -0.004650 | -0.011282 | -0.000273 | -0.000510 | -0.000302 | -0.000176 | -0.001161 | -0.000181 | -0.000886 | 0.000341  |
| 249 | -0.000913 | -0.000208 | -0.005384 | -0.011600 | -0.000342 | -0.000261 | -0.000564 | 0.000014  | -0.001143 | -0.000305 | -0.000772 | 0.000128  |
| 250 | -0.000031 | -0.000031 | -0.005010 | 0.005499  | -0.000133 | 0.000139  | 0.000019  | 0.000061  | -0.000038 | 0.000109  | 0.000088  | 0.000081  |
| 251 | -0.000036 | -0.000141 | -0.004684 | 0.001972  | -0.000218 | 0.000076  | -0.000087 | 0.000032  | 0.000058  | 0.000151  | 0.000062  | 0.000121  |
| 252 | 0.000069  | 0.000098  | 0.003157  | 0.002887  | 0.000122  | 0.000123  | 0.000113  | 0.000091  | 0.000364  | 0.000032  | 0.000279  | -0.000137 |
| 253 | 0.000088  | 0.000137  | 0.003049  | 0.002983  | 0.000106  | 0.000118  | 0.000117  | 0.000105  | 0.000429  | 0.000108  | 0.000330  | -0.000100 |
| 254 | -0.000243 | 0.000007  | 0.002648  | -0.004680 | -0.000078 | 0.000022  | -0.000124 | 0.000155  | -0.000469 | -0.000219 | -0.000325 | -0.000054 |
| 255 | -0.000232 | 0.000133  | 0.006058  | -0.004786 | -0.000003 | 0.000040  | -0.000065 | 0.000216  | 0.000083  | -0.000114 | 0.000012  | -0.000161 |
| 256 | -0.000081 | -0.000728 | -0.015134 | -0.002057 | -0.000515 | -0.000516 | -0.000232 | -0.000506 | 0.000328  | 0.000645  | 0.000067  | 0.000510  |
| 257 | -0.000037 | -0.000782 | -0.014607 | -0.002415 | -0.000358 | -0.000515 | -0.000040 | -0.000668 | -0.000434 | 0.000048  | -0.000457 | 0.000411  |
| 258 | -0.000419 | 0.001404  | 0.000231  | 0.000903  | 0.028185  | 0.001203  | 0.001856  | 0.001255  | 0.003864  | -0.002143 | -0.000326 | -0.001677 |
| 259 | 0.001641  | -0.000587 | 0.001638  | 0.000713  | 0.006960  | 0.021829  | -0.000141 | 0.000327  | -0.001447 | -0.000136 | 0.001043  | -0.000074 |
| 260 | 0.000175  | -0.000841 | 0.000002  | -0.000742 | -0.015670 | -0.001502 | -0.000411 | -0.000641 | -0.001216 | 0.000234  | -0.000614 | 0.000442  |
| 261 | -0.000217 | -0.000573 | -0.000308 | -0.000558 | -0.014676 | -0.001856 | -0.000658 | -0.000656 | -0.000908 | -0.000021 | -0.000528 | 0.000182  |
| 262 | -0.000110 | 0.000275  | -0.000153 | 0.000102  | 0.005959  | -0.005197 | 0.000085  | 0.000069  | -0.000011 | 0.000365  | 0.000281  | 0.000174  |
| 263 | -0.000200 | 0.000213  | -0.000222 | -0.000006 | 0.002567  | -0.004972 | 0.000009  | 0.000044  | 0.000010  | 0.000372  | 0.000146  | 0.000198  |
| 264 | 0.000124  | 0.000123  | 0.000024  | 0.000183  | 0.003516  | 0.002615  | 0.000080  | 0.000121  | -0.000068 | -0.000264 | 0.000108  | -0.000183 |
| 265 | 0.000120  | 0.000137  | 0.000028  | 0.000146  | 0.003456  | 0.002581  | 0.000101  | 0.000146  | -0.000071 | -0.000050 | 0.000220  | -0.000093 |
| 266 | -0.000003 | -0.000053 | -0.000052 | -0.000100 | -0.004752 | 0.002526  | -0.000260 | 0.000004  | 0.000018  | -0.000328 | -0.000261 | -0.000148 |
| 267 | 0.000070  | -0.000016 | -0.000063 | 0.000005  | -0.004975 | 0.006032  | -0.000121 | 0.000027  | 0.000416  | -0.000450 | -0.000021 | -0.000278 |
| 268 | -0.000621 | -0.000010 | -0.000668 | -0.000314 | -0.006204 | -0.011428 | -0.000265 | -0.000316 | -0.000604 | 0.001990  | 0.000724  | 0.001070  |
| 269 | -0.000562 | -0.000075 | -0.000461 | -0.000329 | -0.004425 | -0.011780 | -0.000279 | -0.000385 | 0.000013  | 0.000429  | -0.000772 | 0.000387  |
| 270 | 0.001811  | -0.000087 | 0.001279  | -0.000011 | 0.001627  | 0.001431  | -0.002554 | 0.030857  | 0.000455  | 0.000142  | 0.000844  | -0.000534 |

|     |           |           |           |           |           |           |           |           |           |           |           |           |
|-----|-----------|-----------|-----------|-----------|-----------|-----------|-----------|-----------|-----------|-----------|-----------|-----------|
| 271 | 0.000541  | 0.001535  | -0.000080 | 0.000940  | 0.000059  | 0.000264  | 0.025384  | 0.006231  | 0.001471  | 0.000235  | 0.000450  | -0.000301 |
| 272 | -0.001162 | 0.000359  | -0.000968 | 0.000226  | -0.000991 | -0.000182 | 0.002614  | -0.019107 | -0.001084 | -0.000276 | -0.000732 | 0.000426  |
| 273 | -0.000943 | 0.000166  | -0.000765 | -0.000004 | -0.000882 | -0.000440 | -0.000629 | -0.017092 | -0.001160 | -0.000142 | -0.000527 | 0.000108  |
| 274 | 0.000104  | -0.000357 | 0.000289  | -0.000216 | 0.000359  | -0.000204 | -0.007816 | 0.008753  | 0.000368  | -0.000031 | 0.000124  | -0.000073 |
| 275 | 0.000150  | -0.000558 | 0.000322  | -0.000333 | 0.000359  | -0.000233 | -0.007989 | 0.005637  | 0.000227  | -0.000045 | 0.000009  | 0.000074  |
| 276 | 0.000481  | -0.000191 | 0.000351  | 0.000015  | 0.000242  | 0.000157  | 0.000747  | 0.005238  | 0.000651  | 0.000291  | 0.000419  | -0.000132 |
| 277 | 0.000373  | -0.000124 | 0.000285  | 0.000046  | 0.000181  | 0.000198  | 0.001274  | 0.004735  | 0.000600  | 0.000222  | 0.000353  | -0.000136 |
| 278 | -0.000516 | 0.000551  | -0.000389 | 0.000304  | -0.000516 | 0.000031  | 0.006550  | -0.009050 | -0.000471 | -0.000085 | -0.000241 | 0.000093  |
| 279 | -0.000415 | 0.000539  | -0.000346 | 0.000379  | -0.000443 | 0.000107  | 0.010237  | -0.009502 | -0.000519 | -0.000092 | -0.000183 | 0.000038  |
| 280 | -0.000358 | -0.001023 | -0.000084 | -0.000658 | -0.000023 | -0.000573 | -0.013405 | -0.004055 | -0.000030 | -0.000071 | -0.000141 | 0.000142  |
| 281 | -0.000067 | -0.000809 | 0.000104  | -0.000687 | 0.000025  | -0.000563 | -0.014401 | -0.002659 | -0.000502 | -0.000146 | -0.000372 | 0.000294  |
| 282 | -0.043968 | 0.042985  | -0.000044 | -0.001321 | 0.000533  | -0.000375 | 0.001830  | 0.000192  | 0.000553  | 0.000165  | 0.000455  | 0.000073  |
| 283 | 0.011567  | -0.012504 | 0.000153  | -0.000413 | 0.000247  | -0.000249 | 0.000302  | -0.000380 | -0.000308 | -0.000182 | -0.000078 | -0.000086 |
| 284 | 0.002822  | -0.003395 | -0.000100 | 0.000054  | -0.000027 | 0.000060  | 0.000023  | 0.000086  | -0.000255 | -0.000100 | -0.000107 | -0.000037 |
| 285 | 0.007144  | -0.006996 | -0.000007 | -0.000136 | 0.000068  | -0.000094 | 0.000082  | -0.000091 | -0.000578 | -0.000284 | -0.000275 | -0.000123 |
| 286 | 0.004066  | -0.003555 | -0.000109 | -0.000088 | -0.000033 | -0.000003 | -0.000040 | 0.000075  | -0.000276 | -0.000153 | -0.000186 | -0.000121 |
| 287 | -0.011306 | 0.010735  | -0.000278 | 0.000007  | -0.000167 | 0.000132  | -0.000303 | -0.000028 | -0.001510 | -0.000834 | -0.000815 | -0.000380 |
| 288 | -0.000682 | -0.000001 | 0.033020  | -0.033052 | 0.000976  | 0.000958  | -0.000151 | 0.000492  | 0.001100  | 0.000587  | 0.000497  | 0.000137  |
| 289 | -0.000359 | 0.000193  | -0.013354 | 0.012715  | -0.000201 | 0.000243  | -0.000209 | 0.000265  | 0.000681  | 0.000493  | 0.000422  | 0.000091  |
| 290 | 0.000127  | -0.000193 | -0.003600 | 0.003139  | 0.000063  | -0.000045 | 0.000122  | -0.000103 | -0.000055 | -0.000133 | -0.000064 | -0.000037 |
| 291 | -0.000166 | 0.000050  | -0.006465 | 0.006387  | -0.000037 | 0.000096  | -0.000099 | 0.000111  | -0.000045 | -0.000069 | -0.000056 | -0.000008 |
| 292 | -0.000238 | -0.000052 | -0.002556 | 0.002832  | 0.000011  | 0.000090  | -0.000059 | 0.000007  | -0.000084 | -0.000054 | -0.000058 | 0.000006  |
| 293 | 0.000011  | -0.000317 | 0.012090  | -0.012839 | -0.000009 | -0.000168 | 0.000215  | -0.000231 | 0.000189  | 0.000075  | 0.000062  | -0.000016 |
| 294 | -0.000002 | 0.000446  | -0.000167 | -0.000373 | 0.030117  | -0.030065 | 0.000822  | 0.000941  | 0.000660  | 0.000349  | 0.000207  | 0.000116  |
| 295 | -0.000134 | 0.000178  | 0.000114  | 0.000209  | -0.012075 | 0.013085  | -0.000042 | 0.000177  | 0.000258  | -0.000021 | -0.000107 | 0.000048  |
| 296 | -0.000098 | 0.000024  | -0.000291 | -0.000027 | -0.002356 | 0.002543  | 0.000020  | 0.000121  | -0.000283 | -0.000012 | 0.000019  | 0.000006  |
| 297 | -0.000088 | 0.000086  | -0.000173 | 0.000031  | -0.006423 | 0.006326  | -0.000055 | 0.000113  | -0.000139 | 0.000004  | 0.000006  | -0.000002 |
| 298 | 0.000110  | -0.000117 | 0.000114  | -0.000196 | -0.003292 | 0.002797  | 0.000066  | -0.000061 | -0.000001 | -0.000017 | 0.000029  | -0.000023 |
| 299 | 0.000155  | -0.000278 | 0.000191  | -0.000124 | 0.013512  | -0.012759 | 0.000171  | -0.000169 | -0.000336 | -0.000191 | -0.000138 | -0.000017 |
| 300 | -0.000215 | -0.001307 | 0.000277  | -0.000418 | 0.000697  | 0.000895  | -0.040743 | 0.040524  | -0.000037 | -0.000215 | -0.000139 | -0.000044 |
| 301 | 0.000304  | 0.000047  | 0.000085  | -0.000083 | 0.000032  | 0.000127  | 0.012775  | -0.012072 | -0.000383 | -0.000201 | -0.000208 | -0.000012 |
| 302 | -0.000084 | -0.000141 | 0.000006  | -0.000031 | 0.000117  | 0.000000  | 0.003168  | -0.002771 | 0.000231  | 0.000123  | 0.000104  | 0.000053  |
| 303 | -0.000011 | -0.000039 | 0.000016  | -0.000011 | 0.000057  | -0.000048 | 0.007703  | -0.007740 | 0.000097  | 0.000082  | 0.000080  | 0.000062  |
| 304 | -0.000083 | 0.000120  | -0.000065 | 0.000130  | 0.000047  | 0.000039  | 0.003357  | -0.003934 | 0.000283  | 0.000177  | 0.000189  | 0.000078  |
| 305 | 0.000019  | 0.000293  | -0.000148 | 0.000209  | 0.000076  | 0.000098  | -0.012316 | 0.013056  | 0.000152  | 0.000265  | 0.000211  | 0.000137  |
| 306 | 0.018227  | -0.023749 | -0.002154 | -0.003560 | -0.001501 | -0.002465 | -0.002094 | -0.002855 | -0.002371 | -0.001223 | -0.001085 | -0.000932 |
| 307 | 0.020897  | -0.020115 | -0.000290 | -0.000831 | 0.000177  | -0.000272 | 0.000648  | 0.000018  | -0.001431 | -0.000859 | -0.000664 | -0.000367 |
| 308 | -0.016114 | 0.014607  | 0.000132  | -0.000088 | 0.000149  | -0.000052 | 0.000332  | -0.000082 | 0.000549  | 0.000349  | 0.000371  | 0.000146  |
| 309 | -0.004303 | 0.004784  | 0.000062  | 0.000067  | 0.000009  | 0.000028  | 0.000037  | 0.000124  | 0.000601  | 0.000305  | 0.000270  | 0.000132  |
| 310 | 0.005359  | -0.004573 | -0.000017 | 0.000050  | -0.000054 | 0.000005  | -0.000067 | 0.000026  | -0.000137 | -0.000082 | -0.000091 | -0.000015 |
| 311 | 0.013086  | -0.014015 | -0.000149 | 0.000171  | -0.000104 | 0.000091  | -0.000238 | 0.000021  | -0.000418 | -0.000178 | -0.000168 | -0.000059 |
| 312 | -0.019309 | 0.019636  | 0.000263  | 0.000621  | -0.000169 | 0.000195  | -0.000696 | -0.000106 | 0.000837  | 0.000466  | 0.000285  | 0.000165  |
| 313 | -0.002844 | -0.002600 | -0.019780 | 0.015348  | -0.002296 | -0.001964 | -0.001577 | -0.001966 | 0.002265  | 0.001239  | 0.001152  | 0.000237  |
| 314 | -0.000941 | 0.000013  | -0.021049 | 0.021286  | 0.000370  | 0.000674  | -0.000434 | 0.000496  | 0.000229  | 0.000110  | 0.000109  | 0.000019  |
| 315 | 0.000206  | 0.000001  | 0.012031  | -0.012922 | 0.000030  | 0.000001  | 0.000124  | -0.000021 | 0.000294  | 0.000123  | 0.000122  | 0.000014  |
| 316 | 0.000095  | 0.000002  | 0.003819  | -0.003231 | 0.000086  | -0.000019 | 0.000050  | -0.000055 | -0.000056 | -0.000018 | -0.000021 | 0.000012  |
| 317 | -0.000075 | 0.000083  | -0.003215 | 0.003740  | -0.000004 | 0.000048  | -0.000107 | 0.000080  | -0.000228 | -0.000138 | -0.000124 | -0.000010 |
| 318 | 0.000167  | -0.000187 | -0.013190 | 0.012081  | -0.000045 | -0.000184 | 0.000090  | -0.000116 | -0.000213 | -0.000185 | -0.000116 | -0.000085 |
| 319 | 0.000546  | 0.000088  | 0.021745  | -0.021145 | -0.000432 | -0.000517 | 0.000275  | -0.000380 | -0.000038 | 0.000104  | 0.000024  | 0.000050  |
| 320 | 0.001517  | 0.001874  | 0.002887  | 0.002164  | 0.019512  | -0.014450 | 0.001848  | 0.002522  | 0.002914  | 0.000328  | -0.000001 | 0.000073  |

|     |           |           |           |           |           |           |           |           |           |           |           |           |
|-----|-----------|-----------|-----------|-----------|-----------|-----------|-----------|-----------|-----------|-----------|-----------|-----------|
| 321 | -0.000230 | 0.000401  | -0.000355 | -0.000302 | -0.022021 | 0.021323  | 0.000314  | 0.000611  | -0.000049 | 0.000090  | -0.000005 | 0.000023  |
| 322 | -0.000062 | 0.000087  | -0.000143 | 0.000187  | 0.012541  | -0.011437 | 0.000017  | 0.000208  | 0.000026  | 0.000036  | 0.000020  | 0.000039  |
| 323 | 0.000105  | -0.000085 | 0.000141  | -0.000109 | 0.003096  | -0.003589 | 0.000041  | -0.000127 | 0.000169  | 0.000050  | 0.000074  | -0.000006 |
| 324 | -0.000046 | 0.000075  | -0.000107 | 0.000012  | -0.003765 | 0.003094  | -0.000065 | 0.000008  | 0.000003  | 0.000044  | 0.000035  | -0.000011 |
| 325 | -0.000188 | 0.000076  | -0.000336 | 0.000062  | -0.011427 | 0.012212  | -0.000066 | 0.000138  | -0.000485 | -0.000108 | -0.000104 | -0.000011 |
| 326 | 0.000423  | -0.000558 | 0.000800  | 0.000154  | 0.021378  | -0.021345 | -0.000248 | -0.000841 | 0.000325  | -0.000117 | -0.000024 | -0.000036 |
| 327 | 0.002831  | 0.003481  | 0.001674  | 0.002347  | 0.002564  | 0.002086  | -0.010033 | 0.014629  | -0.001152 | -0.000176 | -0.000236 | 0.000291  |
| 328 | -0.000366 | -0.000252 | -0.000062 | 0.000034  | 0.000072  | 0.000589  | 0.022783  | -0.023454 | 0.000264  | 0.000212  | 0.000229  | 0.000075  |
| 329 | 0.000133  | -0.000293 | 0.000126  | -0.000194 | 0.000150  | 0.000023  | -0.013746 | 0.014975  | -0.000119 | -0.000183 | -0.000175 | -0.000008 |
| 330 | 0.000016  | -0.000134 | 0.000072  | -0.000046 | 0.000111  | -0.000079 | -0.005740 | 0.005085  | 0.000047  | -0.000010 | -0.000001 | -0.000039 |
| 331 | -0.000111 | 0.000069  | -0.000068 | 0.000057  | -0.000120 | -0.000038 | 0.004986  | -0.005580 | -0.000039 | 0.000009  | 0.000024  | -0.000023 |
| 332 | -0.000126 | 0.000074  | -0.000053 | 0.000006  | -0.000149 | 0.000063  | 0.014922  | -0.013788 | 0.000210  | 0.000118  | 0.000079  | 0.000045  |
| 333 | 0.000452  | 0.000542  | -0.000017 | 0.000145  | -0.000069 | -0.000562 | -0.022951 | 0.022553  | -0.000363 | -0.000145 | -0.000159 | -0.000049 |

|    | 121       | 122       | 123       | 124       | 125       | 126       | 127       | 128       | 129       | 130       | 131       | 132       |
|----|-----------|-----------|-----------|-----------|-----------|-----------|-----------|-----------|-----------|-----------|-----------|-----------|
| 1  | 0.008374  | 0.004500  | -0.015052 | 0.004982  | 0.010088  | -0.042184 | -0.037995 | -0.000836 | 0.001673  | 0.001157  | -0.000529 | -0.000572 |
| 2  | 0.010428  | 0.004999  | -0.015662 | 0.005828  | 0.009828  | -0.032135 | -0.029912 | -0.001814 | 0.002550  | 0.002501  | -0.000978 | -0.001080 |
| 3  | 0.000162  | -0.000331 | -0.000834 | 0.000227  | 0.000588  | -0.014150 | -0.000907 | 0.000437  | -0.000108 | -0.000159 | -0.000026 | -0.000095 |
| 4  | -0.000844 | -0.000866 | 0.000086  | -0.000050 | -0.000019 | 0.006151  | 0.005149  | 0.000232  | -0.000277 | 0.000133  | -0.000232 | 0.000166  |
| 5  | 0.000665  | 0.000614  | -0.000768 | 0.000134  | 0.000652  | -0.000281 | -0.003019 | -0.000410 | -0.000075 | 0.000172  | 0.000020  | 0.000139  |
| 6  | 0.000421  | 0.000495  | -0.000207 | -0.000003 | 0.000197  | 0.000084  | -0.002334 | -0.000175 | 0.000464  | -0.000333 | 0.000202  | -0.000177 |
| 7  | -0.021965 | -0.009871 | 0.038083  | -0.011985 | -0.026110 | -0.014643 | -0.011199 | 0.001817  | -0.003639 | -0.003700 | 0.001708  | 0.002122  |
| 8  | -0.000908 | -0.001143 | -0.004063 | 0.001586  | 0.002419  | -0.016016 | -0.005319 | 0.000707  | -0.000436 | -0.000331 | 0.000104  | -0.000146 |
| 9  | -0.000401 | -0.001011 | -0.004891 | 0.001922  | 0.002950  | -0.028979 | -0.006356 | 0.000765  | -0.000255 | -0.000416 | -0.000165 | -0.000154 |
| 10 | -0.001509 | -0.001299 | 0.000172  | -0.000022 | -0.000106 | -0.002228 | -0.001499 | 0.000337  | -0.000501 | -0.000012 | -0.000019 | 0.000234  |
| 11 | -0.001644 | -0.001344 | 0.001276  | -0.000619 | -0.000614 | 0.001435  | 0.000418  | 0.000170  | -0.000203 | -0.000372 | -0.000053 | 0.000358  |
| 12 | -0.000003 | 0.000265  | 0.005542  | -0.002609 | -0.002896 | 0.004163  | 0.001575  | -0.000147 | -0.000320 | -0.000640 | 0.000288  | 0.000343  |
| 13 | 0.000119  | 0.000085  | 0.005568  | -0.002877 | -0.002675 | 0.003474  | 0.000804  | -0.000302 | -0.000085 | -0.000636 | 0.000212  | 0.000311  |
| 14 | -0.000951 | -0.000567 | 0.004289  | -0.001815 | -0.002510 | 0.002854  | 0.001482  | 0.000038  | -0.000757 | -0.000035 | 0.000341  | 0.000163  |
| 15 | -0.001476 | -0.000969 | 0.004160  | -0.001738 | -0.002463 | 0.005308  | 0.002628  | 0.000197  | -0.000457 | -0.000465 | 0.000211  | 0.000206  |
| 16 | 0.000431  | 0.000055  | 0.000389  | -0.000042 | -0.000345 | 0.005696  | 0.002521  | -0.000230 | 0.000312  | 0.000176  | 0.000170  | -0.000188 |
| 17 | 0.000571  | 0.000442  | -0.004837 | 0.001000  | 0.003767  | -0.016788 | -0.009734 | 0.000786  | 0.000076  | -0.000102 | 0.000180  | -0.000906 |
| 18 | 0.001241  | 0.000674  | -0.001293 | 0.000377  | 0.000948  | -0.000809 | -0.001607 | -0.000076 | 0.000107  | 0.000242  | -0.000461 | 0.000194  |
| 19 | 0.001336  | 0.000897  | -0.001900 | 0.000518  | 0.001373  | -0.003822 | -0.003099 | -0.000115 | 0.000265  | 0.000230  | -0.000184 | -0.000049 |
| 20 | -0.001320 | -0.000917 | 0.001093  | -0.000381 | -0.000668 | 0.002848  | 0.002034  | 0.000085  | -0.000232 | 0.000142  | -0.000254 | 0.000534  |
| 21 | 0.001329  | 0.000811  | -0.001512 | 0.000656  | 0.000837  | -0.003694 | -0.002728 | -0.000149 | 0.000164  | 0.000292  | 0.000058  | -0.000289 |
| 22 | 0.000967  | 0.000571  | -0.003017 | 0.001151  | 0.001866  | -0.004982 | -0.004169 | -0.000059 | 0.000252  | 0.000360  | -0.000138 | -0.000159 |
| 23 | 0.000412  | 0.000225  | 0.003232  | -0.001291 | -0.001910 | 0.003895  | 0.002033  | -0.000286 | -0.000164 | -0.000408 | 0.000164  | 0.000208  |
| 24 | 0.001286  | 0.000743  | -0.003416 | 0.001366  | 0.002034  | -0.004425 | -0.003709 | -0.000088 | 0.000229  | 0.000308  | -0.000121 | -0.000143 |
| 25 | 0.001376  | 0.000792  | -0.002893 | 0.000996  | 0.001905  | -0.005762 | -0.004745 | -0.000085 | 0.000346  | 0.000218  | -0.000262 | -0.000126 |
| 26 | -0.001169 | -0.000843 | 0.003474  | -0.001169 | -0.002327 | 0.006934  | 0.004788  | 0.000033  | -0.000343 | -0.000247 | 0.000188  | 0.000174  |
| 27 | 0.001115  | 0.000683  | -0.003006 | 0.001145  | 0.001867  | -0.005122 | -0.004147 | -0.000117 | 0.000486  | 0.000266  | -0.000107 | -0.000211 |
| 28 | 0.001620  | 0.000885  | -0.003711 | 0.001036  | 0.002696  | -0.015663 | -0.007017 | 0.000404  | 0.000145  | -0.000070 | -0.000430 | -0.000100 |
| 29 | 0.000551  | 0.000286  | -0.001635 | 0.000699  | 0.000983  | -0.010108 | -0.004585 | 0.000077  | -0.000163 | 0.000283  | -0.000340 | 0.000394  |
| 30 | 0.000153  | 0.000054  | 0.000619  | -0.000359 | -0.000254 | -0.000502 | -0.000879 | -0.000150 | 0.000046  | 0.000151  | 0.000007  | 0.000074  |
| 31 | 0.001239  | 0.000754  | -0.001518 | 0.000593  | 0.000935  | -0.005752 | -0.004795 | -0.000278 | -0.000032 | 0.000207  | 0.000033  | -0.000004 |
| 32 | 0.001099  | 0.000698  | -0.001706 | 0.000520  | 0.001178  | -0.001884 | -0.002586 | -0.000254 | 0.000136  | -0.000008 | -0.000078 | 0.000069  |
| 33 | 0.000342  | 0.000096  | -0.000106 | -0.000096 | 0.000181  | -0.001487 | -0.002313 | -0.000113 | 0.000145  | -0.000018 | -0.000007 | -0.000078 |
| 34 | -0.000127 | -0.000486 | -0.000827 | 0.000494  | 0.000330  | -0.000690 | -0.000468 | -0.000144 | 0.000442  | -0.000101 | -0.000102 | 0.000034  |

|    |           |           |           |           |           |           |           |           |           |           |           |           |
|----|-----------|-----------|-----------|-----------|-----------|-----------|-----------|-----------|-----------|-----------|-----------|-----------|
| 35 | 0.000170  | -0.000184 | -0.001251 | 0.000266  | 0.000961  | -0.001309 | -0.001836 | 0.000141  | 0.000062  | 0.000186  | 0.000274  | -0.000410 |
| 36 | 0.000135  | 0.000122  | -0.000242 | 0.000017  | 0.000222  | 0.000359  | -0.000265 | -0.000031 | 0.000099  | 0.000093  | 0.000056  | -0.000144 |
| 37 | 0.000195  | 0.000167  | -0.000308 | -0.000029 | 0.000336  | 0.000123  | -0.000531 | -0.000016 | 0.000077  | 0.000090  | -0.000053 | -0.000069 |
| 38 | 0.000132  | 0.000096  | -0.000208 | 0.000046  | 0.000164  | 0.000024  | -0.000117 | -0.000024 | 0.000039  | 0.000078  | -0.000072 | 0.000039  |
| 39 | 0.000134  | 0.000080  | -0.000154 | 0.000093  | 0.000064  | 0.000062  | -0.000068 | -0.000059 | 0.000049  | 0.000073  | -0.000033 | 0.000017  |
| 40 | 0.000170  | 0.000046  | -0.000243 | 0.000144  | 0.000100  | -0.000093 | -0.000155 | -0.000052 | 0.000038  | 0.000026  | -0.000005 | -0.000012 |
| 41 | 0.000182  | 0.000067  | -0.000293 | 0.000150  | 0.000144  | -0.000085 | -0.000169 | -0.000018 | 0.000030  | 0.000017  | -0.000015 | -0.000019 |
| 42 | 0.000144  | 0.000061  | -0.000228 | 0.000119  | 0.000110  | -0.000040 | -0.000145 | -0.000016 | 0.000042  | 0.000023  | -0.000014 | -0.000015 |
| 43 | 0.000102  | 0.000070  | -0.000230 | 0.000094  | 0.000135  | -0.000057 | -0.000170 | -0.000021 | 0.000065  | 0.000055  | -0.000006 | -0.000037 |
| 44 | 0.000309  | 0.000207  | -0.000949 | 0.000164  | 0.000807  | -0.000982 | -0.001841 | 0.000172  | -0.000044 | 0.000084  | -0.000249 | 0.000123  |
| 45 | 0.000212  | 0.000103  | -0.000060 | -0.000053 | 0.000120  | -0.000286 | -0.000489 | -0.000057 | -0.000026 | 0.000039  | 0.000013  | 0.000033  |
| 46 | 0.000414  | 0.000246  | -0.000293 | 0.000166  | 0.000116  | 0.000194  | -0.000134 | -0.000061 | 0.000016  | -0.000008 | 0.000008  | -0.000010 |
| 47 | -0.000049 | -0.000054 | -0.000263 | 0.000202  | 0.000051  | 0.000650  | 0.000414  | -0.000050 | 0.000186  | -0.000039 | 0.000079  | -0.000070 |
| 48 | -0.023981 | -0.040899 | 0.728523  | -0.366197 | -0.362351 | -0.825199 | -0.849706 | 0.000782  | -0.012741 | -0.015060 | 0.011978  | 0.011918  |
| 49 | 0.176797  | 0.093936  | -0.215694 | 0.082119  | 0.133609  | -0.771523 | -0.778265 | 0.001280  | 0.014836  | 0.016256  | -0.011486 | -0.011884 |
| 50 | -0.079995 | 0.208246  | -0.168912 | 0.187060  | -0.018072 | 1.453420  | 1.526090  | 0.033753  | -0.027704 | -0.027530 | 0.009203  | 0.007781  |
| 51 | 0.145151  | 0.088358  | -0.259938 | 0.053308  | 0.206640  | 0.866738  | 0.614956  | -0.006137 | -0.012676 | -0.015309 | 0.016190  | 0.016620  |
| 52 | -0.442893 | -0.448023 | 0.097542  | -0.049616 | -0.048058 | -0.453084 | -0.232392 | -0.018782 | 0.027702  | 0.029126  | -0.016029 | -0.015065 |
| 53 | -0.025660 | -0.030502 | 0.026379  | -0.011648 | -0.014748 | 0.015817  | 0.022251  | 0.001858  | -0.000196 | -0.000278 | -0.000454 | -0.000481 |
| 54 | 0.034452  | 0.054860  | 0.026019  | -0.014738 | -0.011279 | -0.009726 | -0.013352 | 0.000250  | 0.003392  | 0.003153  | -0.002949 | -0.002726 |
| 55 | -0.011075 | -0.032914 | -0.205719 | 0.088030  | 0.117683  | -0.081611 | -0.050906 | 0.176566  | 0.202689  | 0.204670  | -0.194571 | -0.195553 |
| 56 | -0.017792 | -0.015170 | 0.055667  | -0.025136 | -0.030507 | 0.114211  | 0.112997  | 0.009309  | -0.000392 | -0.000285 | -0.003532 | -0.003197 |
| 57 | -0.002008 | -0.004967 | 0.004326  | 0.026633  | -0.030960 | 0.005241  | -0.005433 | 0.057074  | -0.055633 | -0.056026 | 0.067385  | 0.066666  |
| 58 | -0.004808 | 0.000325  | -0.003376 | -0.012446 | 0.015812  | -0.009492 | -0.007761 | -0.049586 | 0.027116  | -0.051991 | 0.072885  | -0.075749 |
| 59 | -0.004766 | -0.000084 | -0.003497 | -0.010944 | 0.014453  | -0.009720 | -0.008185 | -0.049209 | -0.051384 | 0.024878  | -0.075813 | 0.073309  |
| 60 | 0.001092  | 0.000127  | 0.002195  | -0.000699 | -0.001514 | 0.003305  | 0.003715  | 0.000163  | -0.000474 | 0.000286  | -0.000005 | 0.000017  |
| 61 | -0.002726 | -0.003459 | 0.005000  | -0.004095 | -0.000898 | 0.067872  | 0.044473  | 0.000793  | 0.002798  | -0.003345 | -0.001908 | 0.000352  |
| 62 | -0.001315 | -0.000387 | 0.006499  | -0.000952 | -0.005564 | -0.013089 | -0.001120 | 0.000230  | -0.004006 | 0.002312  | 0.002174  | -0.000206 |
| 63 | -0.000687 | 0.000296  | 0.000153  | 0.000673  | -0.000828 | -0.017303 | -0.006497 | 0.000124  | -0.003279 | 0.002199  | 0.002254  | -0.000671 |
| 64 | -0.002759 | -0.002559 | 0.000672  | -0.002090 | 0.001444  | 0.042400  | 0.024694  | 0.000337  | 0.002915  | -0.002826 | -0.001889 | 0.000462  |
| 65 | 0.013194  | 0.011201  | 0.006037  | -0.000183 | -0.006050 | -0.047071 | -0.035971 | -0.002562 | 0.004621  | -0.001953 | -0.002179 | 0.001640  |
| 66 | 0.006502  | 0.004736  | 0.001746  | 0.001291  | -0.002989 | -0.046952 | -0.030112 | -0.000712 | -0.003980 | 0.004151  | 0.000983  | 0.000692  |
| 67 | -0.009788 | -0.008057 | -0.011155 | 0.003611  | 0.007736  | -0.003480 | -0.001979 | 0.001647  | -0.004173 | 0.003123  | 0.001840  | -0.001320 |
| 68 | -0.002360 | -0.001736 | -0.008841 | 0.001738  | 0.007044  | 0.017586  | 0.006531  | 0.000128  | 0.005111  | -0.003663 | -0.001290 | -0.000930 |
| 69 | 0.000774  | 0.000849  | -0.000611 | 0.000138  | 0.000473  | -0.006978 | -0.005277 | -0.000016 | 0.000108  | -0.000009 | 0.000007  | -0.000003 |
| 70 | 0.000399  | 0.000394  | -0.000036 | 0.000106  | -0.000076 | -0.003501 | -0.001839 | -0.000173 | -0.000042 | 0.000169  | 0.000022  | 0.000076  |
| 71 | -0.000340 | -0.000368 | -0.000177 | 0.000344  | -0.000165 | -0.000580 | 0.000218  | 0.000000  | 0.000053  | -0.000103 | -0.000079 | 0.000075  |
| 72 | -0.000155 | -0.000323 | -0.000296 | 0.000001  | 0.000297  | 0.003800  | 0.001307  | 0.000054  | 0.000024  | 0.000094  | -0.000008 | -0.000142 |
| 73 | -0.000592 | -0.000614 | 0.001154  | 0.000048  | -0.001201 | 0.002496  | 0.002979  | -0.000180 | -0.000017 | -0.000085 | -0.000077 | 0.000358  |
| 74 | -0.000552 | -0.000561 | -0.000964 | 0.000450  | 0.000499  | -0.007927 | -0.001136 | 0.000267  | -0.000208 | -0.000232 | 0.000093  | -0.000022 |
| 75 | -0.000656 | -0.000607 | -0.000811 | 0.000371  | 0.000424  | -0.006693 | -0.000987 | 0.000232  | -0.000230 | -0.000234 | 0.000023  | 0.000046  |
| 76 | 0.000078  | -0.000293 | -0.000679 | 0.000631  | 0.000096  | -0.002857 | 0.000715  | -0.000069 | -0.000157 | 0.000118  | -0.000287 | 0.000394  |
| 77 | 0.000426  | 0.000095  | -0.002467 | 0.000682  | 0.001779  | -0.001749 | -0.002842 | 0.000091  | 0.000159  | 0.000063  | -0.000136 | -0.000265 |
| 78 | -0.000955 | -0.000622 | 0.001269  | -0.000472 | -0.000782 | 0.000948  | 0.000992  | 0.000073  | -0.000204 | -0.000205 | 0.000074  | 0.000197  |
| 79 | -0.000862 | -0.000611 | 0.000757  | -0.000246 | -0.000498 | -0.000299 | 0.000440  | 0.000142  | -0.000225 | -0.000161 | 0.000086  | 0.000104  |
| 80 | 0.000283  | -0.000033 | 0.000250  | -0.000024 | -0.000230 | -0.000711 | -0.000852 | 0.000033  | 0.000017  | -0.000175 | 0.000174  | -0.000233 |
| 81 | -0.000083 | -0.000105 | -0.000001 | -0.000267 | 0.000283  | 0.000337  | -0.000746 | 0.000095  | 0.000230  | -0.000100 | -0.000072 | 0.000002  |
| 82 | -0.000443 | -0.000137 | 0.002709  | -0.001240 | -0.001461 | 0.002017  | 0.001330  | -0.000039 | -0.000155 | -0.000287 | 0.000117  | 0.000147  |
| 83 | -0.000518 | -0.000220 | 0.002805  | -0.001235 | -0.001560 | 0.002450  | 0.001801  | -0.000027 | -0.000169 | -0.000341 | 0.000124  | 0.000177  |
| 84 | 0.000610  | 0.000421  | -0.000396 | 0.000072  | 0.000295  | -0.003632 | -0.002895 | -0.000091 | -0.000011 | 0.000286  | 0.000024  | -0.000062 |

|     |           |           |           |           |           |           |           |           |           |           |           |           |
|-----|-----------|-----------|-----------|-----------|-----------|-----------|-----------|-----------|-----------|-----------|-----------|-----------|
| 85  | 0.001101  | 0.000754  | -0.000633 | 0.000045  | 0.000593  | -0.003293 | -0.002763 | -0.000081 | 0.000085  | 0.000156  | -0.000123 | -0.000041 |
| 86  | -0.001017 | -0.000679 | 0.002322  | -0.000932 | -0.001400 | 0.003126  | 0.002516  | 0.000120  | -0.000366 | -0.000199 | 0.000087  | 0.000161  |
| 87  | -0.000907 | -0.000591 | 0.002386  | -0.000920 | -0.001475 | 0.003645  | 0.002818  | 0.000073  | -0.000334 | -0.000185 | 0.000119  | 0.000159  |
| 88  | 0.000364  | 0.000425  | -0.001362 | 0.000355  | 0.000988  | -0.004570 | -0.004808 | 0.000009  | 0.000067  | 0.000147  | 0.000180  | -0.000218 |
| 89  | 0.000354  | 0.000272  | -0.000300 | 0.000178  | 0.000126  | -0.002714 | -0.001048 | -0.000163 | 0.000106  | 0.000049  | -0.000098 | 0.000117  |
| 90  | 0.000320  | 0.000193  | -0.000502 | 0.000254  | 0.000247  | -0.001439 | -0.001154 | -0.000073 | 0.000033  | 0.000186  | -0.000024 | -0.000066 |
| 91  | 0.000169  | 0.000011  | -0.000692 | 0.000329  | 0.000362  | -0.001155 | -0.001113 | -0.000064 | 0.000117  | 0.000036  | -0.000067 | -0.000017 |
| 92  | 0.000164  | -0.000056 | -0.000395 | 0.000191  | 0.000205  | -0.000215 | 0.000305  | -0.000035 | 0.000126  | 0.000092  | 0.000047  | -0.000102 |
| 93  | 0.000329  | 0.000304  | 0.000428  | -0.000167 | -0.000253 | 0.004148  | 0.000608  | -0.000132 | 0.000136  | 0.000127  | -0.000036 | -0.000006 |
| 94  | 0.000224  | 0.000257  | 0.000534  | -0.000282 | -0.000245 | 0.003772  | 0.000522  | -0.000135 | 0.000073  | 0.000105  | -0.000058 | 0.000028  |
| 95  | 0.000275  | 0.000269  | 0.000443  | -0.000201 | -0.000236 | 0.003082  | 0.000530  | -0.000110 | 0.000101  | 0.000090  | 0.000052  | -0.000067 |
| 96  | 0.000393  | 0.000346  | 0.000335  | -0.000160 | -0.000165 | 0.003549  | 0.000411  | -0.000122 | 0.000137  | 0.000145  | -0.000075 | 0.000014  |
| 97  | 0.000578  | 0.000383  | -0.000790 | 0.000260  | 0.000522  | -0.000719 | -0.000761 | -0.000055 | 0.000129  | 0.000132  | -0.000064 | -0.000096 |
| 98  | 0.000380  | 0.000242  | -0.000481 | 0.000215  | 0.000259  | -0.000275 | -0.000266 | -0.000020 | 0.000075  | 0.000074  | -0.000011 | -0.000098 |
| 99  | 0.000335  | 0.000260  | -0.000235 | 0.000036  | 0.000193  | 0.000438  | 0.000026  | -0.000061 | 0.000101  | 0.000047  | -0.000034 | -0.000028 |
| 100 | 0.000524  | 0.000346  | -0.000521 | 0.000205  | 0.000309  | -0.000005 | -0.000370 | -0.000079 | 0.000124  | 0.000110  | -0.000049 | -0.000080 |
| 101 | 0.000285  | 0.000116  | -0.001525 | 0.000690  | 0.000832  | -0.001255 | -0.000894 | 0.000012  | 0.000099  | 0.000182  | -0.000072 | -0.000083 |
| 102 | 0.000149  | 0.000019  | -0.001177 | 0.000552  | 0.000620  | -0.000779 | -0.000439 | 0.000026  | 0.000056  | 0.000108  | -0.000045 | -0.000062 |
| 103 | 0.000179  | 0.000070  | -0.001203 | 0.000527  | 0.000672  | -0.001013 | -0.000700 | 0.000024  | 0.000062  | 0.000147  | -0.000053 | -0.000077 |
| 104 | 0.000336  | 0.000149  | -0.001597 | 0.000706  | 0.000885  | -0.001435 | -0.001096 | 0.000004  | 0.000106  | 0.000193  | -0.000071 | -0.000100 |
| 105 | 0.000612  | 0.000386  | -0.001344 | 0.000543  | 0.000806  | -0.001852 | -0.001517 | -0.000075 | 0.000210  | 0.000117  | -0.000058 | -0.000095 |
| 106 | 0.000406  | 0.000295  | -0.000980 | 0.000393  | 0.000592  | -0.001336 | -0.001041 | -0.000047 | 0.000156  | 0.000083  | -0.000028 | -0.000066 |
| 107 | 0.000367  | 0.000226  | -0.001000 | 0.000391  | 0.000615  | -0.001507 | -0.001126 | -0.000024 | 0.000120  | 0.000070  | -0.000078 | -0.000043 |
| 108 | 0.000537  | 0.000361  | -0.001385 | 0.000527  | 0.000861  | -0.002033 | -0.001618 | -0.000048 | 0.000216  | 0.000114  | -0.000041 | -0.000118 |
| 109 | -0.000280 | -0.000224 | 0.000387  | -0.000150 | -0.000238 | 0.002170  | 0.000921  | 0.000046  | 0.000075  | -0.000130 | -0.000025 | -0.000041 |
| 110 | -0.000071 | -0.000050 | -0.000106 | -0.000018 | 0.000122  | 0.000545  | 0.000118  | 0.000117  | -0.000179 | 0.000084  | 0.000115  | -0.000069 |
| 111 | -0.000303 | -0.000186 | 0.000542  | -0.000298 | -0.000248 | 0.001172  | 0.001002  | 0.000026  | 0.000093  | -0.000197 | 0.000015  | 0.000027  |
| 112 | -0.000029 | -0.000013 | -0.000027 | 0.000040  | -0.000009 | 0.000369  | 0.000250  | 0.000050  | -0.000125 | 0.000008  | 0.000014  | 0.000033  |
| 113 | -0.000021 | 0.000001  | 0.000211  | -0.000084 | -0.000128 | 0.000954  | 0.000802  | 0.000049  | 0.000034  | -0.000148 | -0.000003 | 0.000069  |
| 114 | -0.000133 | -0.000001 | 0.000463  | -0.000238 | -0.000224 | 0.000170  | 0.000277  | 0.000014  | -0.000151 | 0.000109  | 0.000072  | -0.000053 |
| 115 | -0.000076 | 0.000029  | -0.000040 | -0.000027 | 0.000062  | -0.000545 | -0.000496 | 0.000019  | 0.000146  | -0.000185 | -0.000091 | 0.000019  |
| 116 | -0.000086 | 0.000033  | 0.000423  | -0.000166 | -0.000251 | 0.000833  | 0.000192  | 0.000021  | -0.000278 | 0.000092  | 0.000042  | 0.000083  |
| 117 | -0.018257 | -0.026920 | 0.031958  | -0.018514 | -0.013160 | 0.207555  | 0.182725  | 0.006564  | -0.003279 | -0.002624 | 0.000428  | -0.001694 |
| 118 | -0.196404 | -0.149717 | 0.323247  | -0.117634 | -0.205504 | 0.742463  | 0.791644  | 0.016936  | -0.011603 | -0.010259 | 0.002289  | 0.001234  |
| 119 | -0.176821 | -0.120832 | 0.235693  | -0.061104 | -0.174472 | 0.702375  | 0.726443  | 0.023877  | -0.013458 | -0.012126 | 0.001072  | 0.000031  |
| 120 | -0.445445 | -0.484134 | 0.013713  | 0.004665  | -0.018367 | 0.249955  | 0.314836  | 0.012824  | 0.002309  | 0.002700  | -0.006330 | -0.006260 |
| 121 | 0.430856  | 0.014592  | -0.018174 | 0.007050  | 0.011119  | -0.176380 | -0.197416 | -0.006116 | -0.002118 | -0.002385 | 0.004420  | 0.004186  |
| 122 | 0.014592  | 0.469549  | 0.004453  | -0.011713 | 0.007247  | -0.073649 | -0.117472 | -0.006713 | -0.000215 | -0.000289 | 0.001920  | 0.002066  |
| 123 | -0.018174 | 0.004453  | 0.963408  | -0.465851 | -0.497514 | 0.386353  | 0.410285  | -0.016949 | -0.006946 | -0.005884 | 0.010326  | 0.010040  |
| 124 | 0.007050  | -0.011713 | -0.465851 | 0.552065  | -0.086223 | -0.161698 | -0.172630 | 0.056525  | -0.025309 | -0.022740 | -0.008256 | -0.009744 |
| 125 | 0.011119  | 0.007247  | -0.497514 | -0.086223 | 0.583731  | -0.224544 | -0.237583 | -0.039578 | 0.032180  | 0.028697  | -0.002129 | -0.000234 |
| 126 | -0.176380 | -0.073649 | 0.386353  | -0.161698 | -0.224544 | 1.900620  | 1.408270  | 0.003928  | -0.016787 | -0.015826 | 0.010386  | 0.010122  |
| 127 | -0.197416 | -0.117472 | 0.410285  | -0.172630 | -0.237583 | 1.408270  | 1.867910  | 0.002045  | -0.017974 | -0.017031 | 0.013325  | 0.012486  |
| 128 | -0.006116 | -0.006713 | -0.016949 | 0.056525  | -0.039578 | 0.003928  | 0.002045  | 0.631421  | -0.157325 | -0.157857 | -0.096908 | -0.096282 |
| 129 | -0.002118 | -0.000215 | -0.006946 | -0.025309 | 0.032180  | -0.016787 | -0.017974 | -0.157325 | 0.615111  | -0.157509 | -0.097657 | -0.113146 |
| 130 | -0.002385 | -0.000289 | -0.005884 | -0.022740 | 0.028697  | -0.015826 | -0.017031 | -0.157857 | -0.157509 | 0.615178  | -0.112965 | -0.098400 |
| 131 | 0.004420  | 0.001920  | 0.010326  | -0.008256 | -0.002129 | 0.010386  | 0.013325  | -0.096908 | -0.097657 | -0.112965 | 0.466566  | -0.068769 |
| 132 | 0.004186  | 0.002066  | 0.010040  | -0.009744 | -0.000234 | 0.010122  | 0.012486  | -0.096282 | -0.113146 | -0.098400 | -0.068769 | 0.466690  |
| 133 | 0.002196  | 0.003259  | 0.009832  | 0.010052  | -0.019883 | 0.008981  | 0.008086  | -0.118482 | -0.099120 | -0.099810 | -0.078947 | -0.080082 |
| 134 | -0.000412 | -0.000479 | 0.000473  | 0.000742  | -0.001234 | -0.006102 | 0.001041  | -0.000451 | 0.000187  | 0.000088  | -0.000114 | 0.000342  |

|     |           |           |           |           |           |           |           |           |           |           |           |           |
|-----|-----------|-----------|-----------|-----------|-----------|-----------|-----------|-----------|-----------|-----------|-----------|-----------|
| 135 | -0.000365 | -0.000349 | 0.000761  | -0.000175 | -0.000566 | 0.003446  | 0.003526  | -0.000238 | 0.000155  | 0.000098  | 0.000084  | 0.000036  |
| 136 | 0.000484  | 0.000385  | -0.000831 | 0.000224  | 0.000603  | -0.002729 | -0.002651 | -0.000098 | 0.000259  | 0.000116  | 0.000008  | -0.000129 |
| 137 | 0.000452  | 0.000273  | -0.001170 | 0.000355  | 0.000800  | -0.002184 | -0.001658 | -0.000022 | 0.000266  | 0.000056  | 0.000008  | -0.000264 |
| 138 | -0.001008 | -0.001227 | 0.000290  | -0.000105 | -0.000177 | 0.010259  | 0.008273  | -0.000098 | 0.000119  | 0.000015  | -0.000177 | 0.000100  |
| 139 | -0.000731 | -0.000543 | 0.001507  | -0.000390 | -0.001067 | -0.002270 | -0.001791 | -0.000068 | -0.000140 | -0.000021 | -0.000343 | 0.000580  |
| 140 | -0.000348 | -0.000286 | 0.000600  | 0.000059  | -0.000651 | 0.000365  | 0.000025  | -0.000085 | 0.000015  | -0.000032 | -0.000079 | 0.000204  |
| 141 | 0.000231  | 0.000290  | -0.000257 | 0.000350  | -0.000080 | -0.005547 | -0.004191 | -0.000097 | 0.000000  | 0.000159  | -0.000145 | 0.000221  |
| 142 | 0.000168  | 0.000252  | -0.000061 | 0.000255  | -0.000181 | -0.007040 | -0.004988 | -0.000156 | 0.000034  | 0.000252  | -0.000177 | 0.000257  |
| 143 | -0.000155 | -0.000022 | 0.000099  | 0.000047  | -0.000131 | -0.003897 | -0.002642 | -0.000045 | 0.000026  | 0.000076  | -0.000171 | 0.000203  |
| 144 | -0.000695 | -0.000779 | 0.001722  | -0.001807 | 0.000103  | 0.011889  | 0.006900  | 0.000434  | -0.000269 | -0.000707 | 0.000133  | 0.000046  |
| 145 | 0.000224  | 0.000082  | 0.000214  | -0.000421 | 0.000194  | 0.002342  | 0.001209  | 0.000070  | -0.000028 | -0.000236 | 0.000013  | 0.000023  |
| 146 | 0.000240  | 0.000055  | -0.000143 | -0.000082 | 0.000225  | 0.000500  | 0.000067  | 0.000025  | 0.000009  | -0.000077 | 0.000025  | -0.000032 |
| 147 | 0.000543  | 0.000247  | -0.000827 | 0.000394  | 0.000440  | -0.000407 | -0.000860 | -0.000066 | 0.000137  | 0.000024  | -0.000063 | -0.000031 |
| 148 | 0.000780  | 0.000591  | -0.000635 | 0.000197  | 0.000436  | 0.001707  | 0.000527  | 0.000006  | 0.000140  | -0.000227 | 0.000032  | -0.000054 |
| 149 | -0.000812 | -0.000556 | 0.002092  | -0.000889 | -0.001244 | -0.000794 | 0.000300  | 0.000086  | -0.000389 | -0.000209 | 0.000403  | -0.000129 |
| 150 | -0.000115 | -0.000128 | 0.000409  | -0.000055 | -0.000370 | -0.001952 | -0.001366 | 0.000001  | -0.000120 | -0.000013 | 0.000097  | -0.000025 |
| 151 | 0.000156  | 0.000181  | -0.000171 | 0.000379  | -0.000220 | -0.006137 | -0.004148 | -0.000145 | 0.000052  | 0.000123  | 0.000014  | 0.000011  |
| 152 | 0.000193  | 0.000176  | 0.000023  | 0.000051  | -0.000082 | -0.005670 | -0.004036 | -0.000059 | -0.000091 | 0.000066  | 0.000024  | 0.000078  |
| 153 | -0.000086 | -0.000045 | 0.000956  | -0.000333 | -0.000626 | -0.002211 | -0.000565 | -0.000091 | -0.000210 | 0.000091  | -0.000025 | 0.000140  |
| 154 | 0.000132  | -0.000101 | -0.000945 | 0.000480  | 0.000491  | 0.000090  | -0.000447 | -0.000005 | 0.000116  | 0.000168  | -0.000407 | 0.000306  |
| 155 | 0.000357  | 0.000163  | -0.000412 | 0.000132  | 0.000295  | -0.002944 | -0.002818 | -0.000061 | -0.000035 | 0.000077  | -0.000140 | 0.000166  |
| 156 | 0.000962  | 0.000642  | -0.001103 | 0.000457  | 0.000632  | -0.001886 | -0.002101 | -0.000062 | 0.000027  | -0.000175 | 0.000098  | -0.000035 |
| 157 | -0.000056 | -0.000187 | 0.000423  | 0.000071  | -0.000502 | -0.002448 | -0.000019 | -0.000171 | 0.000209  | 0.000029  | 0.000085  | -0.000029 |
| 158 | 0.001122  | 0.001145  | -0.000895 | -0.000174 | 0.000564  | -0.006152 | -0.003940 | -0.000281 | 0.004073  | -0.003894 | 0.001895  | -0.001879 |
| 159 | -0.001474 | -0.002660 | 0.002376  | -0.000691 | 0.000237  | 0.021208  | 0.014783  | 0.001178  | 0.006691  | -0.007588 | -0.002641 | 0.002387  |
| 160 | -0.000588 | -0.001687 | 0.003258  | 0.000069  | 0.000477  | 0.013771  | 0.008495  | -0.000304 | -0.009931 | 0.009758  | -0.007968 | 0.008232  |
| 161 | -0.000372 | 0.000177  | 0.000636  | -0.001352 | -0.000803 | 0.002753  | 0.002577  | 0.000401  | 0.020016  | -0.020475 | 0.000415  | -0.000397 |
| 162 | -0.000008 | -0.000058 | 0.000218  | -0.000142 | -0.000078 | 0.000528  | 0.000421  | 0.000011  | -0.000019 | -0.000056 | 0.000012  | 0.000047  |
| 163 | -0.000835 | -0.001273 | -0.000353 | -0.001282 | 0.001634  | 0.029476  | 0.015898  | 0.000179  | 0.002590  | -0.002140 | -0.001744 | 0.000395  |
| 164 | 0.000714  | 0.000549  | -0.000694 | 0.000467  | 0.000233  | -0.005114 | -0.003771 | -0.000221 | 0.000243  | 0.000096  | -0.000147 | 0.000156  |
| 165 | 0.000129  | 0.000112  | -0.000078 | 0.000070  | 0.000006  | -0.001167 | -0.000443 | 0.000014  | 0.000026  | -0.000013 | 0.000133  | -0.000125 |
| 166 | -0.000469 | -0.000126 | 0.001205  | -0.000659 | -0.000533 | 0.002140  | 0.001097  | 0.000072  | -0.000261 | 0.000005  | 0.000054  | 0.000097  |
| 167 | 0.000327  | 0.000379  | -0.000150 | 0.000587  | -0.000426 | -0.009295 | -0.006796 | -0.000218 | -0.000025 | 0.000153  | -0.000067 | 0.000216  |
| 168 | -0.000087 | -0.000063 | 0.000205  | -0.000087 | -0.000120 | 0.000374  | 0.000268  | -0.000010 | 0.000004  | -0.000013 | -0.000010 | 0.000042  |
| 169 | -0.000346 | -0.000464 | 0.000114  | -0.000424 | 0.000299  | 0.011965  | 0.008449  | 0.000249  | -0.000025 | -0.000256 | 0.000159  | -0.000284 |
| 170 | -0.000965 | -0.000521 | 0.002156  | -0.000650 | -0.001502 | 0.004492  | 0.003932  | 0.000039  | -0.000252 | -0.000045 | 0.000050  | 0.000156  |
| 171 | -0.000041 | 0.000003  | -0.000069 | 0.000246  | -0.000178 | -0.001099 | -0.000565 | -0.000082 | 0.000022  | 0.000151  | -0.000054 | 0.000024  |
| 172 | -0.000544 | -0.000335 | 0.001056  | -0.000253 | -0.000813 | -0.000532 | 0.000614  | -0.000015 | -0.000176 | 0.000099  | 0.000036  | 0.000072  |
| 173 | 0.000076  | 0.000233  | -0.000216 | 0.000543  | -0.000344 | -0.009743 | -0.006557 | -0.000174 | 0.000019  | 0.000159  | 0.000043  | 0.000021  |
| 174 | 0.000025  | -0.000006 | -0.000028 | -0.000069 | 0.000097  | 0.000047  | -0.000185 | 0.000038  | -0.000049 | -0.000042 | 0.000012  | 0.000012  |
| 175 | -0.000134 | -0.000259 | -0.000220 | -0.000078 | 0.000304  | 0.009320  | 0.006241  | 0.000124  | 0.000189  | -0.000122 | 0.000003  | -0.000171 |
| 176 | -0.000630 | -0.000466 | 0.000699  | 0.000339  | -0.001073 | -0.000686 | 0.002695  | -0.000239 | -0.000155 | -0.000164 | 0.000416  | -0.000148 |
| 177 | 0.000226  | 0.000189  | -0.000054 | 0.000215  | -0.000145 | -0.004194 | -0.002240 | -0.000191 | 0.000100  | 0.000452  | -0.000322 | 0.000346  |
| 178 | -0.000277 | -0.000198 | 0.000181  | -0.000236 | 0.000046  | -0.003101 | -0.001258 | -0.000038 | 0.000095  | 0.000106  | 0.000015  | -0.000055 |
| 179 | -0.000032 | -0.000214 | -0.000648 | 0.000544  | 0.000132  | 0.005634  | 0.003307  | 0.000038  | 0.000046  | -0.000049 | -0.000198 | 0.000096  |
| 180 | -0.000171 | -0.000046 | 0.000123  | 0.000357  | -0.000463 | -0.002402 | -0.001824 | -0.000165 | 0.000243  | 0.000178  | -0.000208 | 0.000130  |
| 181 | 0.000235  | 0.000213  | -0.000026 | -0.000482 | 0.000512  | 0.000732  | 0.000049  | 0.000171  | -0.000257 | -0.000272 | 0.000037  | 0.000135  |
| 182 | 0.000095  | 0.000127  | 0.000653  | -0.001100 | 0.000460  | 0.002446  | -0.000230 | 0.000276  | -0.000406 | -0.000230 | 0.000099  | 0.000140  |
| 183 | 0.000480  | 0.000334  | -0.000814 | 0.000279  | 0.000501  | 0.002444  | 0.000147  | 0.000161  | 0.000294  | -0.000041 | 0.000149  | -0.000607 |
| 184 | -0.002331 | -0.002041 | 0.003183  | -0.001878 | -0.000420 | 0.024795  | 0.018230  | 0.000231  | -0.001571 | 0.001394  | -0.002109 | 0.002236  |

|     |           |           |           |           |           |           |           |           |           |           |           |           |
|-----|-----------|-----------|-----------|-----------|-----------|-----------|-----------|-----------|-----------|-----------|-----------|-----------|
| 185 | -0.002265 | -0.003525 | 0.001456  | 0.000519  | 0.000591  | 0.026937  | 0.018172  | 0.001376  | -0.001419 | 0.000508  | -0.005688 | 0.005684  |
| 186 | 0.001041  | 0.001064  | -0.002282 | 0.002116  | 0.000768  | -0.007971 | -0.006522 | -0.000619 | -0.016914 | 0.017751  | 0.001390  | -0.001652 |
| 187 | 0.002005  | 0.003835  | -0.002211 | -0.000533 | -0.001533 | -0.026802 | -0.017582 | -0.000083 | 0.027651  | -0.028089 | 0.007314  | -0.007191 |
| 188 | 0.000301  | 0.001102  | 0.000839  | 0.000969  | -0.001776 | -0.004715 | 0.001327  | -0.000561 | -0.007471 | 0.007610  | -0.000583 | 0.000705  |
| 189 | 0.000249  | 0.000275  | -0.000340 | -0.000155 | 0.000648  | -0.000562 | -0.000642 | -0.002673 | 0.030277  | -0.027133 | 0.005073  | -0.007043 |
| 190 | 0.000243  | 0.000196  | -0.000647 | 0.000034  | 0.000619  | -0.000753 | -0.001510 | 0.000102  | -0.000007 | 0.000012  | -0.000026 | -0.000128 |
| 191 | 0.000255  | 0.000225  | -0.000162 | -0.000140 | 0.000306  | 0.000003  | -0.000432 | -0.000160 | 0.000107  | 0.000118  | -0.000052 | 0.000043  |
| 192 | -0.000084 | -0.000082 | 0.000292  | 0.000074  | -0.000375 | 0.000329  | 0.000597  | -0.000104 | 0.000027  | -0.000040 | 0.000193  | -0.000143 |
| 193 | 0.000009  | 0.000025  | -0.000058 | 0.000006  | 0.000048  | -0.000143 | -0.000071 | 0.000012  | 0.000006  | -0.000004 | 0.000036  | -0.000085 |
| 194 | 0.000104  | 0.000102  | -0.000066 | -0.000101 | 0.000165  | 0.000617  | 0.000176  | -0.000056 | 0.000043  | 0.000054  | -0.000027 | 0.000024  |
| 195 | 0.000001  | -0.000042 | -0.000045 | 0.000133  | -0.000096 | 0.000538  | 0.000206  | -0.000029 | 0.000033  | 0.000017  | 0.000075  | -0.000092 |
| 196 | 0.000074  | 0.000047  | -0.000252 | 0.000067  | 0.000182  | -0.000477 | -0.000504 | -0.000002 | 0.000047  | 0.000022  | -0.000071 | -0.000045 |
| 197 | 0.000094  | 0.000095  | -0.000070 | -0.000017 | 0.000088  | 0.000300  | 0.000062  | -0.000084 | 0.000052  | 0.000062  | -0.000048 | 0.000058  |
| 198 | 0.000028  | 0.000020  | 0.000027  | 0.000042  | -0.000070 | 0.000203  | 0.000167  | -0.000049 | 0.000019  | 0.000003  | 0.000045  | -0.000029 |
| 199 | 0.000020  | 0.000015  | -0.000013 | 0.000024  | -0.000012 | 0.000166  | 0.000100  | -0.000009 | 0.000009  | 0.000008  | 0.000026  | -0.000032 |
| 200 | -0.000044 | -0.000034 | 0.000055  | 0.000019  | -0.000077 | -0.000253 | -0.000005 | 0.000016  | -0.000015 | -0.000038 | 0.000060  | -0.000047 |
| 201 | 0.000044  | 0.000056  | -0.000039 | -0.000072 | 0.000110  | 0.000165  | 0.000025  | -0.000008 | -0.000005 | -0.000020 | -0.000010 | 0.000053  |
| 202 | 0.000129  | 0.000053  | -0.000158 | 0.000060  | 0.000100  | 0.000005  | -0.000018 | -0.000037 | 0.000037  | 0.000068  | -0.000009 | -0.000017 |
| 203 | -0.000008 | 0.000018  | 0.000061  | -0.000077 | 0.000012  | -0.000090 | -0.000011 | 0.000003  | 0.000014  | -0.000017 | 0.000023  | -0.000001 |
| 204 | -0.000077 | -0.000005 | 0.000062  | -0.000070 | 0.000005  | 0.000282  | 0.000243  | 0.000024  | 0.000006  | -0.000044 | -0.000005 | 0.000034  |
| 205 | 0.000121  | 0.000024  | -0.000236 | 0.000247  | -0.000003 | 0.000673  | 0.000312  | -0.000062 | 0.000057  | 0.000107  | -0.000072 | 0.000014  |
| 206 | 0.000066  | 0.000105  | 0.000032  | -0.000008 | -0.000020 | -0.000160 | -0.000160 | -0.000062 | 0.000027  | 0.000022  | 0.000015  | 0.000035  |
| 207 | -0.000063 | -0.000014 | 0.000110  | -0.000055 | -0.000057 | 0.000004  | 0.000070  | -0.000011 | 0.000005  | -0.000047 | 0.000025  | 0.000013  |
| 208 | 0.000032  | 0.000028  | -0.000037 | 0.000008  | 0.000028  | 0.000126  | 0.000060  | -0.000011 | 0.000016  | -0.000003 | 0.000002  | -0.000002 |
| 209 | 0.000022  | 0.000021  | -0.000050 | 0.000008  | 0.000041  | 0.000134  | 0.000072  | 0.000003  | 0.000013  | 0.000003  | -0.000002 | -0.000005 |
| 210 | 0.000101  | 0.000023  | -0.000144 | 0.000089  | 0.000057  | 0.000143  | 0.000031  | -0.000019 | 0.000027  | 0.000046  | -0.000019 | -0.000014 |
| 211 | -0.000039 | 0.000011  | 0.000099  | -0.000007 | -0.000094 | 0.000073  | 0.000038  | -0.000010 | 0.000007  | 0.000017  | -0.000003 | 0.000012  |
| 212 | -0.000042 | 0.000043  | 0.000036  | -0.000074 | 0.000040  | 0.000245  | 0.000147  | 0.000032  | -0.000012 | -0.000038 | 0.000018  | -0.000001 |
| 213 | 0.000125  | 0.000020  | -0.000161 | 0.000071  | 0.000092  | 0.000057  | -0.000072 | -0.000039 | 0.000052  | 0.000071  | -0.000031 | -0.000017 |
| 214 | -0.000032 | -0.000007 | 0.000026  | -0.000015 | -0.000010 | -0.000078 | -0.000050 | -0.000006 | 0.000020  | 0.000035  | -0.000009 | -0.000002 |
| 215 | -0.000212 | -0.000088 | 0.000169  | -0.000094 | -0.000073 | 0.000293  | 0.000327  | 0.000043  | -0.000023 | -0.000031 | 0.000021  | 0.000005  |
| 216 | 0.000090  | -0.000038 | -0.000127 | 0.000099  | 0.000028  | 0.000431  | 0.000184  | -0.000013 | 0.000040  | 0.000012  | -0.000017 | -0.000036 |
| 217 | 0.000179  | 0.000182  | -0.000142 | 0.000089  | 0.000047  | -0.000142 | -0.000270 | -0.000045 | 0.000039  | 0.000037  | -0.000008 | -0.000008 |
| 218 | -0.000096 | -0.000018 | 0.000091  | -0.000068 | -0.000022 | 0.000042  | 0.000073  | 0.000035  | -0.000023 | -0.000025 | 0.000012  | 0.000008  |
| 219 | 0.000004  | 0.000019  | -0.000025 | -0.000003 | 0.000029  | 0.000140  | 0.000074  | 0.000001  | 0.000012  | 0.000004  | 0.000002  | -0.000002 |
| 220 | -0.000001 | -0.000001 | -0.000030 | 0.000005  | 0.000025  | 0.000117  | 0.000075  | -0.000006 | 0.000011  | 0.000021  | -0.000004 | -0.000007 |
| 221 | 0.000098  | -0.000017 | -0.000134 | 0.000095  | 0.000038  | 0.000117  | 0.000013  | -0.000024 | 0.000035  | 0.000025  | -0.000016 | -0.000016 |
| 222 | 0.000008  | 0.000018  | 0.000056  | -0.000012 | -0.000043 | -0.000098 | -0.000147 | 0.000007  | 0.000003  | -0.000015 | -0.000002 | -0.000001 |
| 223 | 0.000082  | 0.000071  | -0.000179 | -0.000109 | 0.000283  | 0.000099  | -0.000215 | -0.000028 | 0.000028  | 0.000019  | 0.000115  | -0.000093 |
| 224 | 0.000164  | 0.000130  | -0.000218 | 0.000100  | 0.000113  | 0.000241  | 0.000040  | -0.000069 | 0.000124  | 0.000112  | 0.000147  | -0.000181 |
| 225 | 0.000015  | 0.000012  | 0.000092  | -0.000041 | -0.000047 | -0.000268 | -0.000113 | -0.000033 | -0.000101 | 0.000051  | -0.000019 | 0.000011  |
| 226 | 0.000012  | 0.000018  | -0.000041 | -0.000067 | 0.000110  | 0.000103  | -0.000127 | 0.000020  | -0.000048 | 0.000007  | 0.000020  | -0.000012 |
| 227 | 0.000125  | 0.000120  | -0.000203 | 0.000053  | 0.000151  | 0.000514  | 0.000077  | -0.000045 | 0.000053  | 0.000068  | 0.000049  | -0.000028 |
| 228 | 0.000081  | 0.000084  | -0.000093 | -0.000002 | 0.000096  | -0.000308 | -0.000239 | -0.000062 | -0.000008 | 0.000052  | -0.000006 | -0.000022 |
| 229 | -0.000011 | -0.000004 | -0.000081 | -0.000086 | 0.000164  | -0.000057 | -0.000310 | 0.000068  | -0.000011 | 0.000027  | 0.000129  | -0.000118 |
| 230 | 0.000096  | 0.000087  | -0.000118 | 0.000049  | 0.000067  | 0.000264  | 0.000078  | -0.000017 | 0.000045  | 0.000056  | 0.000055  | -0.000055 |
| 231 | 0.000042  | 0.000042  | -0.000021 | 0.000025  | -0.000003 | 0.000119  | 0.000059  | -0.000032 | -0.000013 | 0.000022  | -0.000018 | 0.000017  |
| 232 | 0.000034  | 0.000032  | -0.000040 | 0.000017  | 0.000024  | 0.000060  | 0.000022  | -0.000013 | -0.000010 | 0.000020  | -0.000014 | 0.000005  |
| 233 | -0.000043 | -0.000020 | 0.000049  | -0.000045 | -0.000002 | -0.000281 | -0.000145 | 0.000002  | -0.000071 | 0.000012  | -0.000039 | 0.000046  |
| 234 | 0.000071  | 0.000115  | -0.000033 | -0.000184 | 0.000209  | 0.002247  | 0.001027  | -0.000082 | 0.000076  | 0.000101  | -0.000145 | 0.000100  |

|     |           |           |           |           |           |           |           |           |           |           |           |           |
|-----|-----------|-----------|-----------|-----------|-----------|-----------|-----------|-----------|-----------|-----------|-----------|-----------|
| 235 | 0.000675  | 0.000478  | -0.001493 | 0.000113  | 0.001421  | -0.001344 | -0.002825 | 0.000074  | 0.000116  | 0.000409  | -0.000671 | 0.000440  |
| 236 | -0.000209 | -0.000208 | 0.000221  | 0.000178  | -0.000404 | -0.000999 | -0.000316 | 0.000105  | -0.000117 | -0.000224 | 0.000349  | -0.000312 |
| 237 | -0.000235 | -0.000164 | 0.000888  | -0.000031 | -0.000875 | 0.000110  | 0.001218  | -0.000195 | -0.000002 | -0.000185 | 0.000431  | -0.000202 |
| 238 | 0.000085  | 0.000080  | -0.000252 | -0.000074 | 0.000331  | -0.000089 | -0.000319 | 0.000028  | 0.000031  | 0.000095  | -0.000224 | 0.000154  |
| 239 | -0.000013 | -0.000014 | -0.000142 | -0.000026 | 0.000170  | -0.000248 | -0.000232 | 0.000095  | -0.000025 | 0.000016  | -0.000090 | 0.000006  |
| 240 | 0.000087  | 0.000082  | -0.000009 | -0.000033 | 0.000044  | 0.000382  | 0.000136  | -0.000083 | 0.000042  | 0.000049  | -0.000032 | 0.000064  |
| 241 | 0.000100  | 0.000097  | -0.000087 | -0.000037 | 0.000128  | 0.000305  | -0.000001 | -0.000056 | 0.000039  | 0.000074  | -0.000084 | 0.000082  |
| 242 | -0.000098 | -0.000091 | 0.000173  | 0.000069  | -0.000245 | -0.000064 | 0.000254  | -0.000001 | -0.000017 | -0.000047 | 0.000095  | -0.000062 |
| 243 | -0.000069 | -0.000068 | 0.000151  | 0.000047  | -0.000200 | 0.000080  | 0.000296  | -0.000019 | -0.000008 | -0.000032 | 0.000087  | -0.000044 |
| 244 | -0.000142 | -0.000112 | 0.000199  | 0.000015  | -0.000222 | -0.000093 | 0.000346  | 0.000046  | -0.000041 | -0.000091 | 0.000095  | -0.000084 |
| 245 | -0.000252 | -0.000193 | 0.000382  | -0.000038 | -0.000354 | -0.000291 | 0.000409  | 0.000087  | -0.000093 | -0.000166 | 0.000188  | -0.000141 |
| 246 | 0.000592  | 0.000227  | -0.000686 | 0.000532  | 0.000182  | 0.000656  | -0.000513 | -0.000143 | 0.000024  | 0.000197  | -0.000131 | 0.000044  |
| 247 | 0.000248  | 0.000059  | -0.000307 | 0.000126  | 0.000178  | -0.000287 | -0.000063 | -0.000068 | 0.000078  | 0.000177  | -0.000011 | -0.000100 |
| 248 | -0.000242 | -0.000094 | 0.000346  | -0.000277 | -0.000079 | -0.000512 | -0.000040 | 0.000075  | -0.000056 | -0.000113 | 0.000066  | 0.000008  |
| 249 | -0.000106 | -0.000018 | 0.000180  | -0.000173 | -0.000014 | -0.000455 | -0.000143 | 0.000033  | -0.000013 | -0.000061 | 0.000052  | -0.000011 |
| 250 | -0.000066 | -0.000014 | 0.000057  | -0.000049 | -0.000009 | 0.000189  | 0.000142  | 0.000020  | -0.000012 | -0.000038 | 0.000002  | 0.000019  |
| 251 | -0.000091 | -0.000029 | 0.000102  | -0.000046 | -0.000057 | 0.000150  | 0.000144  | 0.000013  | -0.000007 | -0.000054 | 0.000006  | 0.000018  |
| 252 | 0.000110  | 0.000025  | -0.000179 | 0.000124  | 0.000059  | 0.000115  | -0.000010 | -0.000019 | 0.000024  | 0.000063  | -0.000028 | -0.000023 |
| 253 | 0.000085  | 0.000014  | -0.000162 | 0.000125  | 0.000040  | 0.000198  | 0.000079  | -0.000017 | 0.000024  | 0.000058  | -0.000030 | -0.000023 |
| 254 | 0.000033  | 0.000021  | 0.000048  | -0.000073 | 0.000023  | -0.000298 | -0.000216 | 0.000005  | -0.000016 | -0.000006 | 0.000023  | 0.000000  |
| 255 | 0.000140  | 0.000019  | -0.000121 | 0.000089  | 0.000034  | -0.000207 | -0.000242 | -0.000032 | 0.000015  | 0.000070  | -0.000009 | -0.000029 |
| 256 | -0.000346 | -0.000159 | 0.000256  | -0.000073 | -0.000190 | 0.000522  | 0.000716  | 0.000052  | 0.000006  | -0.000097 | 0.000003  | 0.000016  |
| 257 | -0.000359 | -0.000049 | 0.000467  | -0.000304 | -0.000168 | -0.000074 | 0.000146  | 0.000081  | -0.000067 | -0.000193 | 0.000056  | 0.000082  |
| 258 | 0.001128  | 0.000560  | -0.001008 | 0.000350  | 0.000641  | 0.000015  | -0.000844 | -0.000120 | 0.000030  | -0.000066 | 0.000027  | -0.000035 |
| 259 | 0.000159  | -0.000088 | -0.000148 | 0.000251  | -0.000099 | 0.000341  | 0.000183  | -0.000123 | 0.000125  | 0.000205  | -0.000101 | -0.000038 |
| 260 | -0.000333 | -0.000111 | 0.000346  | -0.000198 | -0.000144 | -0.000441 | -0.000059 | 0.000059  | -0.000037 | -0.000024 | 0.000011  | 0.000027  |
| 261 | -0.000135 | -0.000048 | 0.000093  | -0.000070 | -0.000020 | -0.000436 | -0.000204 | 0.000025  | -0.000004 | 0.000013  | -0.000003 | 0.000013  |
| 262 | -0.000136 | -0.000039 | 0.000126  | -0.000059 | -0.000067 | 0.000282  | 0.000282  | 0.000031  | -0.000030 | -0.000033 | 0.000018  | 0.000010  |
| 263 | -0.000157 | -0.000041 | 0.000157  | -0.000078 | -0.000079 | 0.000188  | 0.000240  | 0.000034  | -0.000032 | -0.000038 | 0.000022  | 0.000011  |
| 264 | 0.000149  | 0.000034  | -0.000179 | 0.000082  | 0.000096  | 0.000034  | -0.000075 | -0.000033 | 0.000031  | 0.000038  | -0.000019 | -0.000018 |
| 265 | 0.000098  | -0.000005 | -0.000121 | 0.000066  | 0.000056  | 0.000126  | 0.000025  | -0.000029 | 0.000026  | 0.000031  | -0.000017 | -0.000015 |
| 266 | 0.000099  | 0.000049  | -0.000040 | 0.000019  | 0.000021  | -0.000235 | -0.000226 | -0.000019 | 0.000004  | 0.000011  | -0.000001 | 0.000009  |
| 267 | 0.000247  | 0.000032  | -0.000199 | 0.000128  | 0.000069  | -0.000223 | -0.000312 | -0.000045 | 0.000032  | 0.000030  | -0.000021 | -0.000010 |
| 268 | -0.000703 | -0.000371 | 0.000532  | -0.000182 | -0.000343 | 0.000519  | 0.000851  | 0.000117  | -0.000049 | -0.000058 | 0.000019  | 0.000001  |
| 269 | -0.000415 | 0.000028  | 0.000441  | -0.000310 | -0.000132 | -0.000170 | 0.000136  | 0.000104  | -0.000097 | -0.000110 | 0.000064  | 0.000046  |
| 270 | 0.000259  | 0.000274  | -0.000444 | 0.000050  | 0.000396  | 0.001422  | 0.000195  | 0.000000  | 0.000116  | 0.000083  | 0.000108  | -0.000057 |
| 271 | 0.000220  | 0.000094  | -0.000584 | 0.000490  | 0.000066  | 0.000296  | 0.000447  | -0.000143 | 0.000579  | 0.000046  | 0.000190  | -0.000332 |
| 272 | -0.000228 | -0.000201 | 0.000459  | -0.000237 | -0.000215 | -0.001002 | -0.000216 | 0.000009  | -0.000284 | -0.000087 | -0.000127 | 0.000152  |
| 273 | -0.000075 | -0.000037 | 0.000375  | -0.000145 | -0.000221 | -0.000790 | -0.000281 | -0.000009 | -0.000264 | 0.000044  | -0.000108 | 0.000116  |
| 274 | 0.000039  | 0.000037  | -0.000173 | 0.000037  | 0.000130  | 0.000333  | 0.000001  | 0.000047  | 0.000137  | -0.000004 | 0.000097  | -0.000096 |
| 275 | -0.000036 | -0.000039 | -0.000037 | -0.000037 | 0.000074  | 0.000136  | -0.000046 | 0.000050  | 0.000017  | -0.000036 | 0.000024  | -0.000018 |
| 276 | 0.000077  | 0.000055  | -0.000093 | 0.000121  | -0.000028 | 0.000359  | 0.000230  | -0.000043 | 0.000063  | 0.000044  | 0.000014  | -0.000028 |
| 277 | 0.000079  | 0.000058  | -0.000123 | 0.000107  | 0.000014  | 0.000362  | 0.000196  | -0.000036 | 0.000083  | 0.000034  | 0.000032  | -0.000037 |
| 278 | -0.000051 | -0.000043 | 0.000124  | -0.000041 | -0.000081 | -0.000366 | -0.000082 | 0.000006  | -0.000075 | -0.000015 | -0.000058 | 0.000047  |
| 279 | -0.000024 | -0.000014 | 0.000080  | -0.000022 | -0.000057 | -0.000278 | -0.000052 | -0.000010 | -0.000046 | -0.000003 | -0.000046 | 0.000036  |
| 280 | -0.000083 | -0.000062 | 0.000130  | -0.000113 | -0.000013 | -0.000098 | -0.000154 | 0.000049  | -0.000119 | -0.000031 | -0.000047 | 0.000082  |
| 281 | -0.000176 | -0.000122 | 0.000285  | -0.000210 | -0.000065 | -0.000370 | -0.000236 | 0.000079  | -0.000205 | -0.000076 | -0.000079 | 0.000135  |
| 282 | -0.000052 | -0.000019 | 0.000130  | -0.000007 | -0.000127 | 0.000503  | 0.000355  | 0.000021  | -0.000126 | 0.000013  | 0.000148  | -0.000073 |
| 283 | 0.000043  | 0.000041  | -0.000052 | -0.000037 | 0.000092  | 0.000005  | -0.000126 | 0.000008  | -0.000020 | 0.000027  | -0.000052 | 0.000035  |
| 284 | 0.000018  | 0.000019  | -0.000018 | -0.000034 | 0.000053  | -0.000006 | -0.000043 | -0.000022 | 0.000015  | 0.000009  | -0.000003 | 0.000010  |



|     |           |           |           |           |           |           |           |           |           |           |           |           |
|-----|-----------|-----------|-----------|-----------|-----------|-----------|-----------|-----------|-----------|-----------|-----------|-----------|
| 285 | 0.000060  | 0.000063  | -0.000081 | -0.000064 | 0.000146  | -0.000140 | -0.000239 | -0.000023 | 0.000019  | 0.000017  | -0.000030 | 0.000013  |
| 286 | 0.000062  | 0.000059  | -0.000099 | -0.000047 | 0.000147  | -0.000061 | -0.000271 | -0.000040 | 0.000042  | 0.000025  | -0.000050 | 0.000008  |
| 287 | 0.000200  | 0.000177  | -0.000393 | -0.000140 | 0.000539  | -0.000457 | -0.000935 | -0.000019 | 0.000075  | 0.000082  | -0.000229 | 0.000088  |
| 288 | -0.000077 | -0.000061 | 0.000017  | 0.000003  | -0.000018 | 0.000468  | 0.000262  | -0.000008 | 0.000068  | -0.000031 | -0.000041 | 0.000027  |
| 289 | -0.000086 | -0.000007 | -0.000033 | 0.000054  | -0.000017 | 0.000332  | 0.000238  | 0.000003  | 0.000017  | 0.000091  | -0.000040 | 0.000013  |
| 290 | 0.000045  | -0.000007 | 0.000004  | -0.000001 | -0.000004 | -0.000094 | -0.000075 | -0.000006 | -0.000004 | -0.000040 | 0.000015  | -0.000013 |
| 291 | 0.000018  | -0.000009 | 0.000017  | -0.000012 | -0.000007 | -0.000065 | -0.000048 | 0.000000  | -0.000004 | -0.000034 | 0.000013  | -0.000008 |
| 292 | -0.000002 | -0.000003 | 0.000010  | -0.000005 | -0.000006 | -0.000072 | -0.000036 | 0.000006  | -0.000002 | -0.000013 | 0.000007  | -0.000007 |
| 293 | 0.000005  | 0.000012  | -0.000006 | 0.000026  | -0.000020 | 0.000023  | 0.000032  | -0.000001 | -0.000008 | 0.000020  | 0.000005  | -0.000011 |
| 294 | -0.000067 | -0.000052 | 0.000073  | 0.000010  | -0.000079 | 0.000223  | 0.000233  | -0.000004 | 0.000079  | -0.000044 | -0.000047 | 0.000052  |
| 295 | -0.000053 | 0.000001  | 0.000042  | -0.000033 | -0.000003 | 0.000073  | 0.000145  | 0.000012  | -0.000007 | -0.000015 | 0.000004  | 0.000020  |
| 296 | -0.000001 | -0.000004 | -0.000014 | 0.000013  | -0.000002 | -0.000060 | -0.000053 | -0.000006 | 0.000007  | 0.000005  | 0.000002  | -0.000011 |
| 297 | 0.000009  | -0.000006 | -0.000016 | 0.000007  | 0.000007  | -0.000029 | -0.000040 | -0.000003 | 0.000012  | 0.000004  | -0.000002 | -0.000006 |
| 298 | 0.000011  | 0.000013  | -0.000019 | 0.000007  | 0.000011  | 0.000031  | -0.000003 | -0.000002 | -0.000001 | 0.000006  | 0.000002  | -0.000007 |
| 299 | 0.000003  | 0.000014  | -0.000016 | -0.000027 | 0.000043  | -0.000107 | -0.000065 | 0.000009  | -0.000021 | 0.000009  | 0.000020  | -0.000012 |
| 300 | 0.000032  | 0.000013  | -0.000067 | 0.000105  | -0.000040 | -0.000195 | 0.000063  | -0.000019 | -0.000048 | 0.000125  | 0.000107  | -0.000076 |
| 301 | 0.000008  | 0.000002  | -0.000021 | -0.000017 | 0.000041  | -0.000285 | -0.000182 | 0.000014  | -0.000049 | 0.000026  | -0.000036 | 0.000016  |
| 302 | -0.000027 | -0.000026 | 0.000033  | 0.000015  | -0.000048 | 0.000062  | 0.000063  | 0.000009  | 0.000001  | -0.000023 | -0.000022 | 0.000014  |
| 303 | -0.000029 | -0.000034 | 0.000051  | 0.000012  | -0.000061 | -0.000057 | -0.000021 | 0.000011  | -0.000030 | -0.000024 | -0.000072 | 0.000053  |
| 304 | -0.000033 | -0.000046 | 0.000045  | 0.000037  | -0.000080 | -0.000033 | -0.000004 | 0.000006  | -0.000026 | -0.000037 | -0.000107 | 0.000077  |
| 305 | -0.000063 | -0.000077 | 0.000195  | -0.000026 | -0.000162 | -0.000183 | -0.000139 | -0.000003 | -0.000118 | -0.000054 | -0.000238 | 0.000194  |
| 306 | 0.000477  | 0.000444  | -0.000665 | -0.000406 | 0.001094  | -0.000024 | -0.001816 | -0.000051 | 0.000105  | 0.000164  | -0.000475 | 0.000223  |
| 307 | 0.000184  | 0.000180  | -0.000366 | -0.000160 | 0.000531  | -0.000323 | -0.000967 | 0.000067  | -0.000023 | 0.000067  | -0.000168 | 0.000031  |
| 308 | -0.000081 | -0.000063 | 0.000234  | 0.000032  | -0.000270 | 0.000313  | 0.000586  | -0.000070 | -0.000019 | -0.000026 | 0.000142  | -0.000023 |
| 309 | -0.000067 | -0.000065 | 0.000088  | 0.000061  | -0.000150 | 0.000149  | 0.000252  | 0.000023  | -0.000018 | -0.000014 | 0.000047  | -0.000028 |
| 310 | 0.000008  | 0.000008  | -0.000026 | -0.000003 | 0.000029  | -0.000120 | -0.000106 | 0.000022  | -0.000002 | -0.000011 | -0.000006 | -0.000009 |
| 311 | 0.000032  | 0.000027  | -0.000051 | -0.000038 | 0.000091  | -0.000080 | -0.000129 | -0.000004 | 0.000011  | 0.000004  | -0.000033 | 0.000027  |
| 312 | -0.000077 | -0.000087 | 0.000124  | 0.000109  | -0.000235 | 0.000062  | 0.000370  | -0.000039 | 0.000049  | -0.000019 | 0.000021  | 0.000001  |
| 313 | -0.000218 | -0.000023 | -0.000191 | 0.000232  | -0.000031 | 0.000690  | 0.000630  | 0.000039  | 0.000001  | 0.000203  | -0.000074 | 0.000000  |
| 314 | 0.000001  | -0.000020 | 0.000044  | -0.000026 | -0.000018 | 0.000149  | 0.000059  | -0.000004 | 0.000028  | -0.000053 | -0.000001 | 0.000004  |
| 315 | -0.000008 | -0.000007 | -0.000011 | 0.000019  | -0.000007 | 0.000079  | 0.000053  | -0.000005 | 0.000011  | 0.000006  | -0.000011 | 0.000003  |
| 316 | -0.000009 | -0.000003 | -0.000010 | 0.000004  | 0.000005  | -0.000021 | -0.000013 | 0.000001  | -0.000001 | 0.000001  | -0.000003 | 0.000001  |
| 317 | 0.000023  | -0.000012 | 0.000021  | -0.000038 | 0.000015  | -0.000098 | -0.000076 | 0.000003  | -0.000008 | -0.000031 | 0.000018  | -0.000001 |
| 318 | 0.000054  | 0.000031  | 0.000009  | 0.000005  | -0.000014 | -0.000059 | -0.000052 | -0.000012 | 0.000001  | -0.000026 | 0.000007  | -0.000007 |
| 319 | -0.000061 | 0.000010  | -0.000052 | 0.000036  | 0.000018  | -0.000053 | 0.000029  | 0.000016  | -0.000030 | 0.000103  | -0.000009 | 0.000000  |
| 320 | -0.000075 | -0.000005 | 0.000088  | -0.000002 | -0.000076 | 0.000388  | 0.000497  | 0.000015  | -0.000032 | -0.000021 | 0.000058  | -0.000008 |
| 321 | 0.000000  | -0.000022 | -0.000002 | 0.000001  | -0.000002 | -0.000015 | -0.000022 | 0.000001  | 0.000046  | -0.000017 | -0.000023 | 0.000017  |
| 322 | -0.000025 | -0.000015 | 0.000027  | -0.000008 | -0.000018 | 0.000006  | 0.000040  | 0.000000  | 0.000010  | -0.000010 | -0.000001 | 0.000007  |
| 323 | -0.000001 | 0.000007  | -0.000002 | 0.000015  | -0.000012 | 0.000079  | 0.000047  | -0.000004 | -0.000003 | 0.000003  | -0.000003 | 0.000000  |
| 324 | 0.000018  | -0.000006 | -0.000015 | 0.000020  | -0.000007 | -0.000011 | -0.000031 | -0.000007 | 0.000009  | 0.000006  | -0.000009 | -0.000004 |
| 325 | 0.000018  | -0.000005 | -0.000009 | -0.000021 | 0.000026  | -0.000177 | -0.000151 | 0.000005  | 0.000000  | -0.000005 | 0.000011  | -0.000006 |
| 326 | -0.000009 | 0.000041  | 0.000000  | -0.000007 | 0.000012  | 0.000114  | 0.000113  | 0.000004  | -0.000062 | 0.000024  | 0.000025  | -0.000014 |
| 327 | -0.000133 | -0.000164 | 0.000269  | -0.000147 | -0.000107 | -0.001023 | -0.000770 | 0.000065  | -0.000296 | -0.000039 | -0.000495 | 0.000340  |
| 328 | -0.000026 | -0.000051 | 0.000149  | 0.000046  | -0.000189 | -0.000248 | -0.000090 | -0.000016 | -0.000167 | 0.000030  | -0.000151 | 0.000139  |
| 329 | 0.000005  | 0.000004  | -0.000101 | 0.000016  | 0.000082  | 0.000001  | 0.000041  | 0.000023  | 0.000066  | 0.000009  | 0.000064  | -0.000077 |
| 330 | 0.000015  | 0.000025  | -0.000034 | 0.000013  | 0.000019  | 0.000108  | 0.000078  | -0.000015 | 0.000036  | 0.000018  | 0.000080  | -0.000053 |
| 331 | 0.000011  | 0.000012  | 0.000011  | -0.000010 | -0.000001 | 0.000031  | -0.000003 | 0.000003  | -0.000007 | -0.000007 | 0.000012  | -0.000001 |
| 332 | -0.000022 | -0.000023 | 0.000038  | -0.000009 | -0.000028 | 0.000047  | 0.000034  | -0.000002 | -0.000011 | -0.000007 | -0.000040 | 0.000028  |
| 333 | 0.000017  | 0.000033  | -0.000063 | -0.000056 | 0.000117  | 0.000060  | -0.000058 | 0.000008  | 0.000085  | -0.000044 | 0.000036  | -0.000037 |

|    | 133       | 134       | 135       | 136       | 137       | 138       | 139       | 140       | 141       | 142       | 143       | 144       |
|----|-----------|-----------|-----------|-----------|-----------|-----------|-----------|-----------|-----------|-----------|-----------|-----------|
| 1  | -0.000950 | 0.023770  | 0.004702  | -0.007518 | -0.009371 | 0.001434  | 0.024292  | 0.001146  | -0.010042 | -0.009428 | -0.000319 | 0.017294  |
| 2  | -0.001289 | -0.022098 | -0.007396 | -0.000939 | 0.000369  | -0.002557 | -0.020136 | -0.001291 | 0.002781  | 0.001352  | -0.004697 | -0.027724 |
| 3  | -0.000045 | 0.013042  | -0.001654 | -0.004046 | -0.014112 | -0.022715 | -0.013747 | -0.012282 | -0.010047 | 0.004468  | 0.006234  | 0.004416  |
| 4  | -0.000021 | -0.019202 | 0.011853  | 0.013195  | -0.001951 | -0.014915 | -0.029103 | -0.007403 | -0.006404 | 0.011743  | 0.003293  | -0.010508 |
| 5  | 0.000152  | 0.012029  | 0.011910  | 0.002863  | -0.004054 | -0.009835 | -0.007413 | -0.010093 | -0.017011 | 0.001569  | 0.026144  | -0.060461 |
| 6  | 0.000018  | 0.005267  | 0.005128  | 0.002517  | -0.005831 | -0.005022 | 0.004322  | -0.004934 | 0.000325  | 0.003902  | 0.007853  | -0.038263 |
| 7  | 0.001863  | -0.021075 | -0.009315 | 0.010019  | 0.008379  | -0.017571 | -0.013761 | -0.001842 | 0.020125  | 0.021653  | 0.004911  | -0.017978 |
| 8  | 0.000114  | -0.011677 | -0.013229 | 0.010021  | 0.002915  | -0.016971 | 0.001476  | 0.012724  | -0.000289 | 0.006216  | 0.007300  | 0.009085  |
| 9  | 0.000231  | 0.040011  | -0.003860 | -0.040563 | -0.030079 | 0.011190  | 0.003933  | -0.021588 | -0.003539 | 0.001769  | -0.001539 | -0.000922 |
| 10 | -0.000027 | -0.018337 | 0.013577  | 0.035582  | 0.026278  | -0.003736 | 0.012203  | 0.023506  | -0.003949 | 0.004141  | 0.023391  | -0.005462 |
| 11 | 0.000113  | -0.004710 | 0.000781  | -0.001869 | -0.004473 | 0.000126  | -0.008762 | -0.017163 | -0.001405 | 0.006653  | -0.038635 | 0.013699  |
| 12 | 0.000498  | 0.003419  | 0.000918  | 0.000772  | 0.002931  | -0.000963 | 0.010685  | -0.000058 | -0.001924 | 0.001827  | 0.021904  | -0.012229 |
| 13 | 0.000516  | -0.005460 | 0.004635  | 0.000436  | -0.006403 | -0.010930 | -0.006034 | -0.008587 | -0.005725 | 0.003210  | 0.002624  | 0.026707  |
| 14 | 0.000269  | 0.003868  | -0.001183 | 0.004534  | 0.006184  | 0.002706  | 0.003219  | 0.002288  | 0.004756  | 0.002206  | 0.002929  | 0.011472  |
| 15 | 0.000328  | -0.006467 | 0.016730  | 0.008188  | 0.000534  | -0.000191 | -0.002942 | -0.009084 | -0.003303 | -0.006997 | -0.004378 | -0.016669 |
| 16 | -0.000247 | -0.064156 | -0.023357 | 0.022050  | 0.017876  | -0.038449 | 0.007562  | 0.012666  | -0.000303 | 0.003808  | 0.004303  | 0.009762  |
| 17 | -0.000043 | -0.003085 | 0.009682  | -0.015678 | -0.005102 | -0.007964 | 0.016002  | 0.001074  | 0.014963  | 0.013890  | 0.009912  | -0.000490 |
| 18 | -0.000017 | 0.067951  | 0.023694  | -0.041902 | -0.011463 | 0.055495  | 0.004608  | -0.007597 | -0.003551 | -0.002375 | -0.001196 | 0.000541  |
| 19 | -0.000159 | -0.001279 | 0.005367  | 0.011102  | 0.008991  | 0.006272  | 0.056260  | 0.039890  | 0.003428  | -0.011987 | 0.054901  | -0.006601 |
| 20 | -0.000268 | 0.005350  | 0.011049  | 0.015929  | 0.015321  | -0.002633 | -0.059899 | -0.003850 | 0.000784  | -0.016445 | 0.019610  | -0.002295 |
| 21 | -0.000085 | 0.001547  | -0.002357 | -0.004405 | -0.004838 | -0.002450 | -0.034972 | -0.027923 | 0.022609  | -0.006487 | -0.063976 | 0.006885  |
| 22 | -0.000269 | 0.002080  | -0.000563 | 0.002465  | 0.006811  | 0.006129  | 0.008741  | 0.008563  | 0.004487  | -0.002669 | -0.000945 | -0.036829 |
| 23 | 0.000498  | 0.002201  | 0.000909  | 0.000504  | -0.004908 | -0.007474 | -0.014648 | -0.015019 | -0.010866 | -0.004073 | -0.000822 | -0.144186 |
| 24 | -0.000196 | -0.002022 | 0.003333  | -0.001789 | -0.006141 | -0.005358 | -0.015262 | -0.009376 | -0.008205 | -0.000670 | -0.008300 | 0.072985  |
| 25 | -0.000106 | -0.006617 | -0.009632 | -0.001568 | -0.001630 | -0.000944 | -0.000004 | 0.002345  | 0.001165  | 0.000806  | 0.003562  | 0.019495  |
| 26 | 0.000209  | -0.013473 | -0.005151 | -0.006342 | -0.009546 | -0.011330 | 0.004064  | -0.004898 | -0.001473 | 0.003186  | 0.005256  | 0.023734  |
| 27 | -0.000332 | -0.006266 | 0.004335  | 0.003434  | 0.000768  | 0.002172  | 0.003218  | -0.000990 | 0.001336  | -0.001224 | -0.002533 | -0.003463 |
| 28 | 0.000042  | 0.082439  | 0.010268  | -0.017270 | -0.031419 | 0.017444  | 0.059955  | -0.034434 | 0.011939  | 0.013972  | 0.025662  | 0.000774  |
| 29 | -0.000251 | 0.021830  | 0.030098  | 0.036759  | 0.031131  | -0.019963 | 0.066327  | 0.025658  | -0.012883 | 0.012326  | 0.036416  | 0.014957  |
| 30 | -0.000130 | -0.004887 | 0.004186  | 0.007683  | 0.009453  | 0.000136  | -0.024064 | -0.005226 | 0.005679  | 0.008872  | -0.064912 | 0.024619  |
| 31 | 0.000071  | 0.003312  | 0.005414  | 0.009622  | 0.010708  | 0.002281  | 0.001992  | -0.005955 | 0.004542  | -0.007817 | 0.005995  | -0.004895 |
| 32 | 0.000131  | -0.020926 | 0.010711  | 0.003047  | -0.007255 | -0.014022 | -0.004654 | -0.015160 | -0.007974 | -0.001550 | 0.010585  | 0.100785  |
| 33 | 0.000067  | -0.006941 | 0.010631  | 0.003533  | -0.001070 | -0.008703 | -0.009052 | -0.009546 | -0.001376 | -0.000116 | 0.011651  | 0.103340  |
| 34 | -0.000134 | -0.035725 | 0.016129  | 0.000400  | -0.001021 | -0.010962 | 0.014137  | -0.003422 | 0.004570  | 0.000739  | 0.000945  | 0.011592  |
| 35 | -0.000256 | -0.031207 | -0.029655 | 0.013111  | -0.001851 | -0.023351 | 0.015196  | 0.003904  | 0.010924  | 0.010722  | 0.009157  | 0.022999  |
| 36 | -0.000077 | 0.001401  | 0.003566  | -0.003205 | 0.001407  | 0.004229  | -0.000933 | 0.000231  | -0.000329 | -0.000591 | -0.000799 | -0.000796 |
| 37 | -0.000033 | -0.002370 | 0.001457  | 0.001913  | 0.002866  | 0.002149  | -0.002198 | -0.000322 | 0.000598  | -0.000895 | -0.001431 | -0.000403 |
| 38 | -0.000062 | 0.001308  | 0.000059  | -0.000293 | -0.000254 | 0.001541  | -0.000611 | -0.004903 | 0.003125  | -0.001917 | -0.003522 | 0.000223  |
| 39 | -0.000049 | 0.000375  | -0.000012 | 0.000187  | 0.000337  | 0.001456  | 0.004167  | 0.003230  | 0.002585  | -0.002435 | 0.007835  | -0.000995 |
| 40 | 0.000003  | -0.000231 | -0.000329 | -0.000252 | -0.000011 | 0.000787  | 0.001237  | 0.001206  | 0.000924  | -0.000109 | 0.000841  | 0.004910  |
| 41 | 0.000004  | -0.000341 | -0.000397 | -0.000059 | 0.000346  | 0.000617  | 0.000641  | 0.000837  | 0.000557  | -0.000030 | -0.000552 | -0.000110 |
| 42 | -0.000021 | 0.000806  | 0.000117  | 0.000094  | 0.000615  | 0.000892  | -0.000453 | 0.000367  | 0.000073  | -0.000277 | -0.000852 | -0.002471 |
| 43 | -0.000059 | 0.001910  | 0.000463  | -0.000730 | 0.000947  | 0.001497  | -0.000407 | 0.001145  | 0.000244  | -0.000100 | -0.000445 | -0.000836 |
| 44 | -0.000088 | 0.000429  | 0.001173  | 0.000807  | 0.003381  | -0.014267 | 0.007099  | 0.021384  | 0.001681  | 0.007379  | 0.006405  | 0.001257  |
| 45 | -0.000002 | -0.000688 | 0.001055  | 0.000811  | -0.000697 | -0.002812 | -0.006103 | -0.004476 | -0.005913 | -0.001696 | -0.020099 | -0.003678 |
| 46 | 0.000053  | -0.002506 | 0.001238  | 0.000798  | -0.001385 | -0.002652 | -0.000225 | -0.001839 | -0.000965 | 0.000358  | 0.001918  | 0.008038  |
| 47 | -0.000108 | -0.005672 | -0.018612 | 0.000137  | -0.005193 | -0.004679 | -0.000051 | -0.002405 | -0.000951 | 0.000487  | 0.001157  | 0.002733  |
| 48 | 0.003949  | 0.001697  | -0.002421 | 0.002002  | 0.000180  | -0.009600 | 0.004740  | 0.000663  | 0.005478  | 0.007620  | 0.004473  | -0.006325 |

|    |           |           |           |           |           |           |           |           |           |           |           |           |
|----|-----------|-----------|-----------|-----------|-----------|-----------|-----------|-----------|-----------|-----------|-----------|-----------|
| 49 | -0.009811 | -0.002197 | 0.000874  | -0.000609 | 0.000123  | 0.003784  | -0.002337 | -0.000022 | -0.000815 | -0.001791 | -0.001362 | 0.004585  |
| 50 | 0.005719  | -0.002590 | 0.002703  | -0.003597 | -0.002240 | 0.010590  | -0.001306 | 0.001390  | -0.004097 | -0.005434 | -0.003018 | 0.008190  |
| 51 | 0.002289  | -0.003363 | 0.001735  | 0.001545  | 0.000706  | 0.000603  | -0.002998 | -0.001703 | -0.001014 | -0.000890 | -0.000855 | 0.003406  |
| 52 | -0.008376 | 0.010259  | -0.002424 | 0.001771  | 0.000095  | -0.009696 | 0.009153  | 0.002505  | 0.006610  | 0.008961  | 0.005756  | -0.015303 |
| 53 | -0.000447 | 0.001998  | 0.000246  | 0.000155  | 0.000202  | 0.000482  | -0.000562 | -0.000337 | -0.001135 | -0.001165 | -0.000460 | 0.001526  |
| 54 | -0.001310 | -0.000856 | -0.000312 | -0.000054 | -0.000013 | -0.000292 | -0.000257 | 0.000020  | 0.000277  | 0.000153  | -0.000029 | 0.000017  |
| 55 | -0.204693 | 0.000402  | -0.000024 | -0.000166 | -0.000032 | 0.000221  | 0.000276  | 0.000168  | -0.000029 | -0.000200 | -0.000114 | 0.000712  |
| 56 | -0.001965 | 0.004851  | 0.003527  | 0.000001  | -0.000850 | 0.001671  | -0.000116 | 0.000394  | -0.000676 | -0.000980 | -0.000342 | 0.002657  |
| 57 | -0.074539 | -0.000313 | 0.000030  | 0.000073  | 0.000019  | -0.000143 | -0.000320 | -0.000026 | 0.000035  | -0.000008 | -0.000094 | -0.000050 |
| 58 | 0.077107  | -0.000106 | 0.000027  | 0.000182  | 0.000086  | -0.000055 | -0.000053 | 0.000001  | 0.000024  | 0.000067  | -0.000010 | -0.000480 |
| 59 | 0.077501  | 0.000219  | 0.000071  | 0.000068  | -0.000018 | 0.000004  | -0.000157 | 0.000014  | 0.000151  | 0.000316  | 0.000127  | -0.000798 |
| 60 | 0.000015  | -0.002977 | -0.000788 | 0.001233  | 0.001486  | -0.000300 | -0.002514 | 0.000323  | 0.001998  | 0.002173  | 0.000547  | -0.003271 |
| 61 | 0.001287  | 0.033776  | 0.035354  | -0.001126 | -0.004418 | 0.027375  | -0.028732 | 0.019008  | -0.045927 | -0.043047 | 0.024463  | 0.036328  |
| 62 | -0.000441 | -0.029270 | 0.011950  | -0.035528 | -0.031405 | 0.024889  | 0.024864  | 0.025779  | -0.003046 | -0.007923 | 0.002849  | -0.064949 |
| 63 | -0.000580 | 0.027273  | 0.001002  | -0.008800 | -0.003284 | 0.015694  | -0.028565 | 0.029512  | -0.041397 | -0.048537 | 0.009668  | 0.024319  |
| 64 | 0.000971  | -0.026281 | 0.032078  | -0.040975 | -0.041159 | 0.025721  | 0.025872  | 0.006893  | -0.014438 | -0.014827 | 0.004171  | -0.050900 |
| 65 | 0.000371  | -0.018482 | -0.010996 | 0.011386  | 0.004693  | -0.035491 | 0.028971  | -0.033379 | 0.038637  | 0.045574  | -0.012157 | -0.033105 |
| 66 | -0.001108 | 0.027602  | -0.029755 | 0.038357  | 0.035115  | -0.031886 | -0.015476 | -0.013966 | 0.015395  | 0.015954  | -0.007851 | 0.039582  |
| 67 | -0.001081 | -0.043886 | -0.025668 | -0.001663 | 0.002508  | -0.008124 | 0.029512  | -0.015555 | 0.049300  | 0.046193  | -0.021871 | -0.026576 |
| 68 | 0.000588  | 0.027846  | -0.014199 | 0.038350  | 0.037820  | -0.019040 | -0.036693 | -0.019157 | 0.001642  | 0.006497  | 0.000383  | 0.074382  |
| 69 | -0.000088 | 0.021990  | 0.000641  | 0.004024  | 0.003552  | 0.004363  | 0.007510  | 0.004163  | 0.001952  | 0.007111  | 0.004759  | 0.017144  |
| 70 | -0.000051 | 0.006476  | 0.000531  | 0.004828  | 0.011667  | 0.002096  | -0.031743 | 0.001356  | -0.008297 | -0.003518 | -0.010248 | -0.040542 |
| 71 | 0.000055  | -0.013061 | -0.004078 | 0.001017  | -0.000587 | -0.011198 | -0.002230 | -0.013595 | 0.002770  | 0.000658  | -0.004038 | -0.006183 |
| 72 | -0.000027 | -0.016086 | -0.004433 | -0.002026 | -0.007355 | -0.003856 | 0.027067  | 0.000599  | 0.013162  | 0.006178  | 0.005732  | 0.034450  |
| 73 | 0.000005  | -0.047906 | -0.015579 | 0.005086  | 0.012139  | -0.018245 | -0.022636 | 0.008732  | -0.015272 | -0.008453 | -0.006367 | 0.003134  |
| 74 | 0.000111  | -0.008437 | -0.015731 | 0.010939  | -0.007390 | -0.014971 | 0.010484  | -0.005732 | 0.006075  | 0.005217  | 0.004095  | 0.004016  |
| 75 | 0.000170  | 0.031514  | -0.000096 | -0.010710 | -0.009633 | 0.012346  | 0.010039  | -0.010559 | 0.004235  | 0.002530  | 0.002296  | 0.003136  |
| 76 | 0.000004  | 0.036549  | 0.017568  | -0.013731 | -0.002440 | 0.017903  | -0.030376 | 0.006563  | -0.022124 | -0.014211 | -0.011886 | -0.010274 |
| 77 | 0.000077  | -0.017305 | 0.000911  | 0.006959  | -0.003414 | 0.015088  | 0.110656  | 0.001789  | 0.021045  | 0.005624  | 0.040020  | -0.005669 |
| 78 | 0.000076  | -0.001328 | 0.003403  | 0.006575  | 0.008139  | -0.004382 | -0.014296 | 0.017659  | -0.021302 | 0.007354  | 0.013875  | 0.004610  |
| 79 | 0.000063  | -0.001812 | 0.000881  | 0.002375  | 0.005090  | -0.007650 | -0.045200 | -0.000700 | -0.013632 | 0.008359  | -0.022140 | 0.008029  |
| 80 | 0.000184  | -0.008436 | -0.009006 | -0.012074 | -0.017272 | 0.002900  | 0.039616  | -0.025348 | 0.024877  | -0.006307 | -0.052084 | -0.006282 |
| 81 | -0.000157 | -0.003207 | 0.000540  | 0.004224  | 0.010776  | 0.007008  | 0.025740  | 0.020628  | 0.012641  | 0.011600  | 0.009802  | 0.138026  |
| 82 | 0.000227  | 0.003186  | -0.000369 | 0.000582  | 0.000625  | -0.000799 | -0.001949 | -0.003191 | -0.002075 | -0.003023 | 0.004240  | -0.087748 |
| 83 | 0.000247  | 0.003180  | 0.000773  | -0.001224 | -0.003529 | -0.003836 | -0.008479 | -0.007946 | -0.005783 | -0.002861 | 0.002976  | -0.055639 |
| 84 | -0.000150 | -0.012280 | 0.000264  | -0.005634 | -0.006173 | -0.003666 | 0.011483  | 0.006693  | 0.005511  | 0.009359  | 0.006780  | 0.217104  |
| 85 | -0.000003 | 0.015388  | 0.005772  | 0.010600  | 0.012370  | 0.011159  | -0.011833 | 0.003798  | -0.002135 | -0.006842 | -0.007111 | -0.050696 |
| 86 | 0.000209  | -0.007633 | 0.000230  | -0.002828 | -0.003142 | -0.003798 | 0.004247  | -0.001502 | 0.000166  | 0.000551  | 0.002195  | 0.017156  |
| 87 | 0.000179  | -0.007209 | 0.004027  | -0.001006 | -0.002333 | -0.002951 | 0.004190  | -0.002528 | 0.000531  | 0.000204  | 0.000257  | 0.009708  |
| 88 | -0.000187 | 0.025541  | 0.010239  | 0.014895  | 0.013838  | 0.015362  | -0.007953 | 0.000942  | 0.002554  | -0.003336 | -0.005778 | -0.036324 |
| 89 | -0.000014 | 0.026376  | 0.011689  | -0.002719 | -0.012342 | 0.028511  | 0.027048  | 0.003207  | -0.009754 | -0.000520 | 0.015092  | 0.002659  |
| 90 | -0.000061 | -0.002925 | -0.002216 | -0.002171 | 0.002286  | 0.000816  | -0.006647 | -0.004001 | 0.005401  | 0.007456  | -0.017940 | 0.004358  |
| 91 | -0.000009 | -0.002359 | 0.004320  | -0.001186 | -0.000726 | -0.001048 | -0.001689 | -0.002443 | -0.001103 | -0.001920 | 0.002953  | 0.039194  |
| 92 | -0.000131 | -0.013999 | -0.001802 | 0.009785  | 0.002153  | -0.008526 | 0.003260  | -0.000590 | 0.001811  | -0.001480 | -0.001229 | 0.001099  |
| 93 | -0.000095 | 0.002004  | 0.003558  | -0.005807 | 0.003826  | 0.006172  | -0.005772 | 0.002775  | -0.003593 | -0.003224 | -0.002560 | -0.001877 |
| 94 | -0.000017 | 0.006568  | 0.012049  | -0.004528 | 0.003484  | 0.008896  | -0.004682 | 0.002953  | -0.002482 | -0.001973 | -0.001517 | -0.002099 |
| 95 | -0.000068 | -0.015348 | 0.001299  | 0.005595  | 0.007531  | -0.005065 | -0.005354 | 0.004854  | -0.001472 | -0.001066 | -0.000965 | -0.001073 |
| 96 | -0.000104 | -0.014580 | -0.000059 | 0.004161  | 0.009240  | -0.008844 | -0.004750 | 0.005330  | -0.002834 | -0.001467 | -0.001151 | -0.001637 |
| 97 | -0.000052 | -0.000220 | -0.002318 | -0.003616 | -0.003972 | 0.002219  | 0.010401  | -0.005796 | 0.012421  | -0.002918 | -0.005653 | -0.002005 |
| 98 | -0.000025 | 0.001522  | -0.001064 | -0.002960 | -0.004190 | 0.002035  | 0.004400  | -0.012333 | 0.011033  | -0.004680 | -0.007884 | -0.002501 |

|     |           |           |           |           |           |           |           |           |           |           |           |           |
|-----|-----------|-----------|-----------|-----------|-----------|-----------|-----------|-----------|-----------|-----------|-----------|-----------|
| 99  | -0.000028 | 0.001330  | 0.000291  | -0.000457 | -0.001980 | 0.004296  | 0.021606  | 0.000982  | 0.007362  | -0.006051 | 0.015713  | -0.004771 |
| 100 | -0.000031 | 0.000265  | -0.001229 | -0.002082 | -0.003106 | 0.003446  | 0.022475  | -0.001047 | 0.006816  | -0.007119 | 0.007455  | -0.003208 |
| 101 | -0.000144 | -0.001911 | -0.000109 | -0.000505 | -0.000151 | 0.000874  | 0.001354  | 0.002183  | 0.001274  | 0.001374  | -0.002943 | 0.045003  |
| 102 | -0.000085 | -0.001370 | 0.000438  | -0.000223 | -0.000627 | -0.000040 | 0.000624  | 0.001007  | 0.000811  | 0.001653  | -0.001197 | 0.041319  |
| 103 | -0.000108 | -0.001508 | -0.000141 | 0.000831  | 0.001670  | 0.001539  | 0.003806  | 0.003422  | 0.002410  | 0.001158  | -0.001573 | 0.022211  |
| 104 | -0.000139 | -0.001730 | -0.000602 | 0.000364  | 0.001821  | 0.002304  | 0.004635  | 0.004526  | 0.003322  | 0.001676  | -0.001433 | 0.033645  |
| 105 | -0.000106 | 0.004011  | -0.000331 | 0.001551  | 0.001806  | 0.002367  | -0.002255 | 0.001065  | 0.000003  | -0.000467 | -0.001265 | -0.008267 |
| 106 | -0.000103 | 0.003721  | 0.000049  | 0.001267  | 0.001413  | 0.001457  | -0.001901 | 0.000426  | -0.000033 | 0.000057  | -0.000948 | -0.008897 |
| 107 | -0.000049 | 0.003957  | -0.001610 | 0.000057  | 0.001027  | 0.001182  | -0.002202 | 0.001271  | -0.000384 | 0.000042  | 0.000222  | -0.004563 |
| 108 | -0.000130 | 0.003327  | -0.002159 | 0.000979  | 0.001316  | 0.001722  | -0.002154 | 0.001295  | -0.000398 | -0.000485 | -0.000461 | -0.005511 |
| 109 | 0.000075  | -0.010086 | -0.011502 | -0.005239 | 0.003049  | -0.026444 | -0.012282 | -0.021452 | 0.006753  | -0.001903 | -0.012472 | -0.002241 |
| 110 | -0.000065 | -0.016604 | 0.000517  | -0.007756 | 0.008728  | -0.000892 | -0.014984 | 0.019461  | 0.002418  | 0.002209  | -0.001859 | -0.000155 |
| 111 | 0.000039  | -0.000792 | -0.000095 | -0.000493 | -0.001955 | -0.002212 | -0.000385 | -0.000619 | -0.004267 | -0.003084 | -0.012900 | 0.009762  |
| 112 | 0.000022  | 0.003318  | 0.002428  | 0.002320  | -0.000530 | 0.001176  | 0.007556  | 0.003410  | -0.000701 | -0.003404 | 0.028785  | -0.013091 |
| 113 | 0.000001  | 0.003436  | 0.000535  | 0.001753  | 0.001516  | 0.001255  | 0.000180  | 0.001039  | 0.000108  | 0.000735  | -0.001138 | -0.025988 |
| 114 | 0.000010  | -0.000881 | -0.004738 | -0.000450 | -0.000639 | -0.000251 | 0.001656  | 0.001359  | 0.001072  | 0.001213  | -0.001788 | -0.013605 |
| 115 | 0.000091  | 0.006667  | 0.018342  | -0.005401 | 0.000094  | 0.008065  | -0.001841 | 0.000173  | -0.001178 | 0.000761  | 0.001407  | 0.001885  |
| 116 | 0.000044  | 0.007892  | -0.018476 | -0.003549 | -0.001846 | -0.000431 | -0.001672 | 0.000224  | -0.000704 | 0.000547  | -0.000111 | -0.003405 |
| 117 | 0.000692  | -0.021161 | 0.003180  | -0.006786 | -0.003860 | 0.016426  | -0.007898 | 0.001519  | -0.002498 | -0.005052 | -0.003422 | 0.027878  |
| 118 | 0.001845  | -0.004510 | 0.003014  | -0.003415 | -0.001975 | 0.010501  | -0.003368 | 0.000311  | -0.004567 | -0.005896 | -0.003204 | 0.013916  |
| 119 | 0.001090  | -0.003662 | 0.002845  | -0.003464 | -0.001860 | 0.011140  | -0.002469 | 0.000528  | -0.005323 | -0.007295 | -0.004110 | 0.009717  |
| 120 | -0.005455 | 0.000898  | 0.000700  | -0.000868 | -0.000719 | 0.002228  | 0.001250  | 0.000630  | -0.000526 | -0.000425 | 0.000170  | 0.001460  |
| 121 | 0.002196  | -0.000412 | -0.000365 | 0.000484  | 0.000452  | -0.001008 | -0.000731 | -0.000348 | 0.000231  | 0.000168  | -0.000155 | -0.000695 |
| 122 | 0.003259  | -0.000479 | -0.000349 | 0.000385  | 0.000273  | -0.001227 | -0.000543 | -0.000286 | 0.000290  | 0.000252  | -0.000022 | -0.000779 |
| 123 | 0.009832  | 0.000473  | 0.000761  | -0.000831 | -0.001170 | 0.000290  | 0.001507  | 0.000600  | -0.000257 | -0.000061 | 0.000099  | 0.001722  |
| 124 | 0.010052  | 0.000742  | -0.000175 | 0.000224  | 0.000355  | -0.000105 | -0.000390 | 0.000059  | 0.000350  | 0.000255  | 0.000047  | -0.001807 |
| 125 | -0.019883 | -0.001234 | -0.000566 | 0.000603  | 0.000800  | -0.000177 | -0.001067 | -0.000651 | -0.000080 | -0.000181 | -0.000131 | 0.000103  |
| 126 | 0.008981  | -0.006102 | 0.003446  | -0.002729 | -0.002184 | 0.010259  | -0.002270 | 0.000365  | -0.005547 | -0.007040 | -0.003897 | 0.011889  |
| 127 | 0.008086  | 0.001041  | 0.003526  | -0.002651 | -0.001658 | 0.008273  | -0.001791 | 0.000025  | -0.004191 | -0.004988 | -0.002642 | 0.006900  |
| 128 | -0.118482 | -0.000451 | -0.000238 | -0.000098 | -0.000022 | -0.000098 | -0.000068 | -0.000085 | -0.000097 | -0.000156 | -0.000045 | 0.000434  |
| 129 | -0.099120 | 0.000187  | 0.000155  | 0.000259  | 0.000266  | 0.000119  | -0.000140 | 0.000015  | 0.000000  | 0.000034  | 0.000026  | -0.000269 |
| 130 | -0.099810 | 0.000088  | 0.000098  | 0.000116  | 0.000056  | 0.000015  | -0.000021 | -0.000032 | 0.000159  | 0.000252  | 0.000076  | -0.000707 |
| 131 | -0.078947 | -0.000114 | 0.000084  | 0.000008  | 0.000008  | -0.000177 | -0.000343 | -0.000079 | -0.000145 | -0.000177 | -0.000171 | 0.000133  |
| 132 | -0.080082 | 0.000342  | 0.000036  | -0.000129 | -0.000264 | 0.000100  | 0.000580  | 0.000204  | 0.000221  | 0.000257  | 0.000203  | 0.000046  |
| 133 | 0.472307  | -0.000055 | -0.000136 | -0.000163 | -0.000053 | 0.000036  | -0.000003 | -0.000021 | -0.000133 | -0.000212 | -0.000091 | 0.000381  |
| 134 | -0.000055 | 0.229079  | -0.055610 | 0.057332  | 0.056723  | -0.054956 | 0.028218  | -0.003070 | -0.003152 | 0.011381  | 0.004986  | 0.003021  |
| 135 | -0.000136 | -0.055610 | 0.421275  | -0.052622 | 0.041138  | 0.054697  | 0.003889  | 0.021191  | 0.002476  | 0.002957  | -0.005004 | 0.010367  |
| 136 | -0.000163 | 0.057332  | -0.052622 | 0.276683  | -0.034215 | 0.041087  | 0.012739  | -0.002143 | -0.000092 | 0.008553  | 0.007762  | 0.016943  |
| 137 | -0.000053 | 0.056723  | 0.041138  | -0.034215 | 0.276832  | -0.056331 | -0.002452 | -0.013374 | -0.002621 | -0.000143 | 0.006445  | 0.015282  |
| 138 | 0.000036  | -0.054956 | 0.054697  | 0.041087  | -0.056331 | 0.428155  | -0.000337 | 0.050171  | -0.015074 | -0.004890 | 0.021802  | 0.010705  |
| 139 | -0.000003 | 0.028218  | 0.003889  | 0.012739  | -0.002452 | -0.000337 | 0.248020  | -0.056299 | 0.059568  | 0.058407  | -0.051812 | 0.027006  |
| 140 | -0.000021 | -0.003070 | 0.021191  | -0.002143 | -0.013374 | 0.050171  | -0.056299 | 0.417123  | -0.055459 | 0.040127  | 0.060498  | 0.006084  |
| 141 | -0.000133 | -0.003152 | 0.002476  | -0.000092 | -0.002621 | -0.015074 | 0.059568  | -0.055459 | 0.273738  | -0.028722 | 0.039727  | 0.012276  |
| 142 | -0.000212 | 0.011381  | 0.002957  | 0.008553  | -0.000143 | -0.004890 | 0.058407  | 0.040127  | -0.028722 | 0.272458  | -0.054065 | -0.002573 |
| 143 | -0.000091 | 0.004986  | -0.005004 | 0.007762  | 0.006445  | 0.021802  | -0.051812 | 0.060498  | 0.039727  | -0.054065 | 0.416913  | -0.003727 |
| 144 | 0.000381  | 0.003021  | 0.010367  | 0.016943  | 0.015282  | 0.010705  | 0.027006  | 0.006084  | 0.012276  | -0.002573 | -0.003727 | 0.333652  |
| 145 | 0.000161  | 0.010796  | -0.002772 | 0.000258  | -0.003011 | 0.003465  | -0.002429 | 0.020526  | -0.005073 | -0.013101 | 0.050395  | -0.059579 |
| 146 | 0.000051  | 0.002645  | 0.001107  | 0.004042  | 0.004216  | -0.000952 | -0.000802 | -0.000014 | -0.000286 | -0.000163 | -0.002695 | 0.038085  |
| 147 | -0.000007 | 0.009207  | -0.004812 | 0.004619  | 0.005938  | -0.001125 | 0.005920  | -0.000415 | 0.007908  | 0.004223  | 0.004725  | -0.033956 |
| 148 | 0.000104  | 0.019213  | 0.005363  | 0.008942  | 0.008810  | -0.004387 | 0.001947  | -0.003546 | 0.000737  | -0.001461 | 0.006181  | -0.064194 |

|     |           |           |           |           |           |           |           |           |           |           |           |           |
|-----|-----------|-----------|-----------|-----------|-----------|-----------|-----------|-----------|-----------|-----------|-----------|-----------|
| 149 | 0.000251  | 0.023918  | -0.000703 | -0.000279 | 0.013363  | 0.003324  | 0.000545  | 0.010371  | 0.008506  | 0.008101  | 0.009251  | 0.039486  |
| 150 | 0.000062  | 0.003083  | 0.020745  | 0.006324  | 0.007577  | -0.003669 | 0.010638  | -0.004662 | -0.000935 | -0.003298 | -0.001530 | 0.000289  |
| 151 | -0.000057 | 0.009814  | -0.005170 | -0.000959 | 0.007602  | 0.002581  | 0.008926  | -0.001121 | 0.013463  | 0.013904  | -0.001793 | -0.000815 |
| 152 | -0.000016 | -0.004182 | -0.014065 | -0.001617 | -0.000533 | 0.002529  | 0.009066  | -0.002073 | 0.013685  | 0.013081  | -0.000984 | 0.020096  |
| 153 | 0.000097  | -0.003622 | 0.050597  | -0.012113 | -0.003192 | 0.020190  | 0.009522  | 0.002302  | -0.002818 | -0.000957 | -0.005350 | 0.008621  |
| 154 | -0.000184 | -0.015893 | 0.034902  | -0.010025 | -0.028025 | 0.058208  | -0.011141 | 0.060519  | -0.028884 | -0.010673 | 0.037779  | 0.013038  |
| 155 | -0.000008 | 0.011324  | -0.003398 | 0.009768  | 0.005742  | 0.006295  | -0.015065 | 0.034474  | -0.012241 | -0.027485 | 0.058314  | -0.029306 |
| 156 | 0.000150  | 0.012198  | 0.007220  | 0.007292  | 0.009443  | -0.002713 | 0.009172  | -0.002738 | 0.004790  | 0.001714  | 0.001697  | -0.025118 |
| 157 | -0.000124 | -0.018926 | 0.064534  | -0.027686 | -0.013322 | 0.029602  | 0.008461  | 0.006429  | 0.002404  | 0.005719  | -0.002275 | 0.014018  |
| 158 | 0.000094  | -0.000147 | -0.002096 | -0.000081 | 0.000238  | -0.000703 | 0.000128  | 0.000952  | 0.000680  | 0.000281  | -0.000367 | 0.000220  |
| 159 | -0.000004 | -0.002007 | 0.003854  | -0.000080 | -0.001895 | 0.001797  | 0.006942  | 0.001043  | 0.001434  | 0.001290  | 0.001902  | 0.003871  |
| 160 | 0.000177  | -0.002605 | 0.002646  | -0.000420 | -0.002050 | 0.001136  | 0.006787  | 0.001055  | 0.001731  | 0.001632  | 0.001991  | 0.002467  |
| 161 | 0.000093  | -0.000142 | 0.000332  | -0.000306 | 0.000048  | 0.001848  | -0.000270 | -0.000104 | -0.000366 | -0.000272 | 0.000113  | 0.000303  |
| 162 | 0.000007  | -0.001924 | 0.000041  | -0.000986 | -0.001059 | -0.000544 | 0.001345  | 0.000346  | 0.000948  | 0.000923  | -0.000563 | -0.005342 |
| 163 | 0.000685  | 0.000086  | 0.010658  | 0.001271  | -0.001854 | 0.002186  | 0.001036  | -0.005635 | -0.003396 | -0.000904 | 0.003623  | 0.005707  |
| 164 | -0.000131 | 0.074645  | -0.066545 | 0.072210  | -0.090676 | -0.023476 | 0.011472  | -0.014244 | 0.002064  | 0.011178  | 0.004793  | 0.027793  |
| 165 | -0.000035 | 0.000911  | 0.122803  | -0.048653 | 0.048491  | -0.122275 | -0.004812 | -0.008456 | 0.003310  | -0.001523 | -0.004776 | -0.000797 |
| 166 | 0.000039  | -0.070764 | 0.023767  | 0.088755  | -0.073303 | 0.069562  | 0.006200  | 0.015383  | 0.003344  | -0.000258 | -0.012780 | -0.026079 |
| 167 | -0.000058 | -0.008544 | 0.005207  | -0.000576 | -0.003139 | -0.017468 | 0.072612  | -0.072997 | 0.070819  | -0.084319 | -0.022400 | 0.011298  |
| 168 | -0.000011 | 0.003843  | 0.004304  | 0.000669  | -0.004530 | 0.006308  | -0.002456 | 0.121698  | -0.046870 | 0.046231  | -0.121579 | -0.002414 |
| 169 | 0.000160  | -0.009314 | 0.003126  | -0.010699 | -0.001842 | 0.018313  | -0.074996 | 0.022739  | 0.084581  | -0.071579 | 0.072513  | 0.006236  |
| 170 | 0.000059  | -0.021206 | 0.010022  | -0.027915 | -0.024744 | 0.011737  | 0.009614  | -0.007495 | -0.000251 | 0.000598  | 0.016455  | -0.113277 |
| 171 | -0.000065 | -0.002220 | -0.006033 | -0.010789 | -0.009115 | 0.001180  | -0.002383 | -0.001008 | 0.001209  | 0.001152  | 0.014944  | -0.120762 |
| 172 | -0.000013 | -0.018796 | 0.005296  | -0.016162 | -0.016960 | 0.004861  | -0.006347 | 0.003036  | -0.009887 | -0.004760 | 0.008999  | -0.034946 |
| 173 | -0.000069 | 0.007542  | -0.017331 | 0.001826  | 0.009882  | -0.003149 | 0.016007  | -0.005445 | 0.020440  | 0.020861  | -0.003183 | -0.001303 |
| 174 | 0.000031  | -0.004077 | -0.008021 | 0.004242  | -0.000485 | -0.003767 | -0.000148 | -0.001612 | 0.000290  | -0.000667 | 0.000654  | 0.004822  |
| 175 | -0.000026 | 0.010317  | 0.016935  | 0.002258  | 0.001195  | -0.005050 | -0.015467 | 0.004496  | -0.020177 | -0.020528 | 0.004062  | -0.022099 |
| 176 | 0.000297  | -0.026755 | 0.066511  | 0.002733  | -0.053562 | 0.061373  | -0.035949 | -0.060327 | -0.000927 | -0.019910 | -0.022851 | -0.013899 |
| 177 | -0.000392 | 0.031226  | 0.017456  | 0.021429  | 0.002562  | 0.063660  | 0.017457  | -0.070466 | 0.050870  | -0.001802 | -0.073534 | -0.020279 |
| 178 | -0.000126 | 0.017523  | -0.008771 | 0.010692  | 0.007294  | 0.015252  | -0.010542 | 0.072551  | 0.003278  | -0.052684 | 0.072839  | -0.036148 |
| 179 | 0.000064  | 0.003221  | 0.004483  | 0.000233  | -0.000072 | 0.010500  | 0.031647  | 0.016635  | 0.017787  | 0.001967  | 0.071681  | 0.036151  |
| 180 | -0.000185 | -0.001779 | -0.008829 | 0.000241  | -0.000432 | -0.003647 | 0.016067  | -0.008722 | 0.011343  | 0.008106  | 0.005875  | 0.009040  |
| 181 | 0.000196  | -0.018387 | -0.015824 | -0.006219 | -0.009998 | 0.009634  | 0.007382  | 0.002553  | 0.007073  | 0.005818  | 0.004152  | 0.053864  |
| 182 | 0.000134  | -0.027898 | -0.057848 | 0.000422  | -0.017538 | -0.016621 | -0.006282 | -0.005985 | -0.006473 | -0.007656 | -0.000634 | 0.027359  |
| 183 | 0.000034  | 0.016575  | -0.069567 | 0.053065  | -0.003360 | -0.072278 | -0.017223 | -0.014401 | -0.008990 | -0.010845 | 0.012708  | 0.008786  |
| 184 | -0.000182 | -0.001774 | 0.003480  | -0.000192 | -0.002107 | 0.001266  | 0.006155  | 0.001071  | 0.001253  | 0.001445  | 0.002127  | 0.002564  |
| 185 | -0.000455 | -0.002410 | 0.005214  | 0.000001  | -0.002275 | 0.002602  | 0.009294  | 0.001436  | 0.001762  | 0.001371  | 0.001619  | 0.005710  |
| 186 | -0.000009 | -0.001014 | -0.000919 | -0.000146 | 0.000014  | -0.001115 | -0.000147 | 0.000020  | 0.000262  | 0.000226  | 0.000071  | -0.001212 |
| 187 | 0.000480  | 0.004835  | -0.005543 | 0.000558  | 0.002848  | -0.002419 | -0.010170 | -0.000992 | -0.001929 | -0.001774 | -0.002430 | -0.003935 |
| 188 | 0.000278  | 0.000277  | -0.002423 | -0.000302 | 0.001557  | -0.000173 | -0.005477 | -0.001495 | -0.001441 | -0.001409 | -0.001546 | -0.002917 |
| 189 | 0.001471  | 0.000102  | 0.000056  | -0.000050 | 0.000014  | 0.000181  | -0.000037 | -0.000043 | -0.000038 | -0.000027 | -0.000057 | 0.000198  |
| 190 | 0.000045  | 0.000610  | 0.002173  | 0.001764  | 0.000150  | -0.002714 | 0.002475  | 0.002283  | -0.000220 | 0.000636  | 0.003163  | 0.000767  |
| 191 | -0.000060 | 0.005093  | 0.003189  | 0.003440  | 0.001523  | 0.001221  | 0.005078  | -0.000133 | 0.001226  | 0.002657  | 0.002704  | 0.001494  |
| 192 | 0.000067  | -0.001133 | 0.000008  | -0.000761 | -0.000652 | 0.003163  | -0.003167 | -0.000540 | -0.001716 | -0.002157 | -0.001104 | -0.000596 |
| 193 | 0.000034  | 0.001023  | -0.000541 | 0.000681  | 0.000859  | -0.002555 | -0.001382 | -0.004151 | 0.001087  | -0.000768 | -0.001889 | -0.000524 |
| 194 | -0.000039 | -0.001491 | -0.000011 | -0.001022 | -0.001948 | 0.001937  | -0.000713 | 0.002821  | -0.000627 | -0.000526 | -0.000086 | -0.000170 |
| 195 | -0.000004 | -0.004108 | -0.004577 | -0.002330 | -0.001076 | -0.001955 | -0.003680 | 0.005444  | 0.000509  | -0.002448 | -0.004220 | -0.001276 |
| 196 | 0.000045  | 0.000265  | 0.000143  | 0.000516  | 0.000740  | 0.000349  | -0.001125 | -0.002214 | 0.001285  | 0.000818  | -0.000438 | -0.000423 |
| 197 | -0.000041 | 0.000078  | 0.000138  | 0.000104  | 0.000200  | -0.000197 | 0.000017  | -0.000358 | 0.000080  | 0.000127  | 0.000217  | -0.000022 |
| 198 | 0.000011  | -0.000022 | 0.000031  | 0.000015  | 0.000042  | -0.000249 | -0.000191 | 0.000132  | -0.000070 | -0.000164 | -0.000208 | 0.000005  |

|     |           |           |           |           |           |           |           |           |           |           |           |           |
|-----|-----------|-----------|-----------|-----------|-----------|-----------|-----------|-----------|-----------|-----------|-----------|-----------|
| 199 | -0.000001 | -0.000158 | -0.000346 | -0.000288 | -0.000142 | 0.000000  | -0.000301 | 0.000378  | 0.000022  | -0.000149 | -0.000336 | -0.000117 |
| 200 | 0.000025  | 0.000311  | -0.000171 | -0.001152 | -0.001309 | -0.000157 | -0.000274 | -0.000588 | -0.000368 | -0.000485 | -0.000218 | -0.000020 |
| 201 | -0.000009 | -0.001174 | -0.000575 | -0.000630 | -0.000773 | -0.001590 | -0.003651 | -0.003344 | -0.001028 | 0.000113  | -0.003074 | 0.000589  |
| 202 | -0.000044 | 0.000034  | 0.000290  | 0.000225  | -0.000037 | -0.000155 | -0.000623 | 0.000294  | -0.000765 | -0.002093 | 0.001998  | -0.000563 |
| 203 | -0.000021 | -0.000079 | -0.000120 | -0.000067 | 0.000052  | -0.000019 | 0.000309  | -0.000473 | 0.000914  | 0.001241  | -0.001498 | -0.000455 |
| 204 | -0.000013 | 0.000049  | 0.000240  | 0.000269  | 0.000032  | 0.000207  | 0.000060  | 0.000728  | -0.000086 | -0.000938 | 0.003815  | -0.001762 |
| 205 | -0.000049 | 0.000696  | -0.000384 | -0.000245 | 0.000656  | 0.001169  | 0.002791  | 0.002042  | 0.002281  | 0.001031  | -0.000434 | 0.003195  |
| 206 | -0.000037 | 0.000722  | 0.000111  | 0.000105  | 0.000038  | 0.000322  | 0.000974  | 0.001705  | 0.001115  | 0.001033  | -0.002650 | -0.000487 |
| 207 | 0.000017  | 0.000183  | 0.000116  | 0.000114  | 0.000029  | 0.000049  | 0.000483  | -0.000090 | -0.000957 | -0.001386 | 0.000689  | -0.000023 |
| 208 | -0.000003 | 0.000003  | 0.000008  | -0.000007 | -0.000015 | -0.000040 | -0.000117 | -0.000208 | -0.000215 | -0.000258 | 0.000167  | -0.000073 |
| 209 | -0.000013 | 0.000047  | -0.000008 | -0.000007 | 0.000000  | 0.000041  | 0.000129  | 0.000135  | 0.000111  | 0.000084  | 0.000045  | 0.000004  |
| 210 | -0.000023 | 0.000059  | -0.000042 | -0.000017 | -0.000011 | 0.000055  | 0.000100  | 0.000173  | 0.000052  | 0.000053  | -0.000195 | -0.000250 |
| 211 | -0.000023 | 0.000361  | -0.000046 | -0.000058 | 0.000017  | 0.000011  | -0.000189 | -0.000002 | 0.000459  | 0.000688  | 0.000910  | -0.001264 |
| 212 | 0.000002  | -0.000690 | -0.001326 | -0.000364 | -0.000297 | -0.000021 | -0.000233 | 0.000129  | -0.000017 | -0.000312 | -0.000770 | -0.001987 |
| 213 | -0.000039 | -0.000349 | -0.001091 | -0.000771 | 0.000124  | 0.000213  | -0.000599 | 0.000192  | 0.000106  | -0.000589 | -0.001077 | -0.003608 |
| 214 | -0.000040 | 0.000141  | -0.000041 | 0.000030  | -0.000099 | -0.000126 | 0.000041  | -0.000037 | -0.000045 | 0.000047  | -0.000171 | -0.000397 |
| 215 | -0.000015 | 0.000588  | 0.000686  | 0.000319  | 0.000238  | 0.000290  | 0.000307  | 0.000063  | -0.000076 | 0.000105  | 0.000178  | -0.001197 |
| 216 | 0.000013  | -0.000212 | -0.000062 | 0.000175  | -0.000287 | -0.000241 | 0.000243  | -0.000146 | -0.000166 | 0.000057  | 0.000224  | 0.001178  |
| 217 | -0.000016 | 0.000073  | 0.000363  | 0.000394  | 0.000546  | 0.000445  | 0.000572  | 0.000407  | 0.000240  | -0.000284 | 0.000029  | 0.000221  |
| 218 | -0.000007 | -0.000067 | 0.000118  | 0.000053  | -0.000017 | -0.000080 | -0.000075 | -0.000077 | 0.000045  | 0.000135  | 0.000245  | 0.000767  |
| 219 | -0.000018 | 0.000099  | 0.000005  | -0.000019 | -0.000020 | -0.000003 | -0.000018 | 0.000009  | -0.000032 | 0.000011  | -0.000023 | -0.000161 |
| 220 | -0.000015 | 0.000041  | -0.000039 | -0.000035 | 0.000002  | 0.000018  | 0.000022  | 0.000032  | -0.000001 | -0.000037 | -0.000078 | -0.000365 |
| 221 | -0.000005 | 0.000045  | 0.000075  | 0.000020  | -0.000033 | -0.000049 | -0.000004 | -0.000037 | -0.000043 | 0.000037  | 0.000069  | 0.000086  |
| 222 | 0.000008  | 0.000088  | 0.000017  | 0.000054  | -0.000153 | -0.000162 | 0.000067  | -0.000184 | -0.000131 | 0.000134  | 0.000064  | -0.000709 |
| 223 | -0.000040 | 0.001576  | -0.003909 | 0.000410  | 0.001703  | 0.002913  | -0.000062 | 0.000894  | 0.000428  | -0.000078 | -0.000351 | 0.000978  |
| 224 | -0.000136 | -0.000432 | -0.002263 | 0.001026  | 0.000192  | -0.000800 | -0.000366 | -0.000401 | -0.000281 | -0.000083 | -0.000068 | -0.000496 |
| 225 | 0.000091  | 0.000784  | 0.004394  | -0.000743 | 0.000387  | 0.001337  | 0.000314  | 0.000391  | 0.000120  | 0.000239  | 0.000229  | -0.000147 |
| 226 | 0.000013  | 0.001201  | -0.000623 | 0.001662  | 0.001233  | -0.000146 | 0.000271  | 0.000173  | 0.000075  | 0.000050  | -0.000058 | -0.000443 |
| 227 | -0.000098 | -0.002064 | 0.001370  | -0.001934 | -0.001216 | -0.000489 | -0.000390 | -0.000669 | -0.000466 | -0.000030 | 0.000004  | -0.000034 |
| 228 | 0.000044  | 0.000418  | -0.000157 | 0.000144  | 0.001254  | -0.000875 | -0.000390 | 0.000507  | 0.000596  | -0.000086 | -0.000379 | -0.000080 |
| 229 | -0.000094 | -0.000063 | 0.000493  | 0.000761  | 0.000550  | 0.000165  | 0.000303  | 0.000075  | 0.000088  | -0.000001 | -0.000017 | 0.000071  |
| 230 | -0.000084 | 0.000337  | -0.000212 | -0.000001 | 0.000180  | 0.000330  | -0.000051 | 0.000106  | 0.000012  | -0.000047 | -0.000076 | 0.000064  |
| 231 | 0.000024  | 0.000233  | 0.000016  | 0.000052  | 0.000146  | 0.000175  | 0.000044  | 0.000100  | 0.000032  | 0.000000  | -0.000006 | 0.000029  |
| 232 | 0.000012  | 0.000052  | 0.000276  | -0.000182 | -0.000183 | -0.000198 | 0.000014  | -0.000026 | -0.000031 | 0.000001  | 0.000000  | -0.000042 |
| 233 | 0.000050  | 0.000937  | 0.001775  | -0.001270 | -0.000724 | 0.000475  | 0.000346  | 0.000423  | 0.000219  | 0.000250  | 0.000197  | 0.000090  |
| 234 | -0.000053 | -0.007866 | -0.006956 | -0.003095 | 0.001366  | -0.000952 | -0.007144 | 0.010186  | 0.004550  | -0.000229 | -0.005357 | -0.002831 |
| 235 | -0.000379 | 0.008231  | 0.006690  | 0.003743  | -0.001512 | -0.003594 | 0.014884  | 0.005662  | -0.003647 | 0.005506  | 0.011749  | 0.004553  |
| 236 | 0.000204  | 0.000846  | 0.001094  | 0.000581  | -0.000219 | 0.002576  | 0.000558  | -0.001858 | -0.000800 | -0.000550 | -0.000066 | 0.000245  |
| 237 | 0.000158  | 0.001342  | 0.001156  | 0.000599  | 0.000254  | 0.004200  | -0.001392 | -0.003987 | -0.001434 | -0.001593 | -0.000799 | 0.000075  |
| 238 | -0.000086 | 0.000398  | 0.000428  | 0.000420  | 0.000598  | -0.002588 | -0.000733 | -0.002427 | 0.001151  | 0.000023  | -0.000494 | -0.000309 |
| 239 | -0.000003 | 0.000076  | 0.000307  | 0.000321  | 0.000644  | -0.001981 | -0.000963 | -0.001712 | 0.000845  | -0.000155 | -0.000713 | -0.000276 |
| 240 | -0.000041 | 0.000325  | -0.000054 | 0.000037  | 0.000039  | 0.000647  | 0.001878  | 0.000950  | -0.000271 | 0.001213  | 0.001656  | 0.000473  |
| 241 | -0.000056 | 0.000551  | 0.000083  | 0.000297  | 0.000311  | 0.000916  | 0.002090  | 0.000832  | -0.000108 | 0.001410  | 0.001833  | 0.000538  |
| 242 | 0.000034  | 0.000191  | 0.000098  | -0.000295 | -0.000491 | 0.001158  | -0.001049 | 0.000643  | -0.000795 | -0.000900 | -0.000929 | -0.000174 |
| 243 | 0.000017  | 0.000283  | 0.000136  | -0.000311 | -0.000653 | 0.001984  | -0.001321 | 0.001350  | -0.000737 | -0.000896 | -0.001025 | -0.000256 |
| 244 | 0.000077  | -0.002274 | -0.001743 | -0.001110 | -0.000020 | -0.001250 | -0.003968 | -0.005486 | 0.000642  | -0.002233 | -0.003192 | -0.001216 |
| 245 | 0.000129  | -0.002080 | -0.001235 | -0.001181 | -0.000313 | -0.001147 | -0.002847 | -0.004215 | 0.000591  | -0.001606 | -0.002682 | -0.000829 |
| 246 | 0.000003  | 0.002023  | 0.000552  | 0.000714  | 0.000839  | 0.002090  | 0.006674  | 0.004463  | 0.000381  | -0.002491 | -0.005669 | 0.004629  |
| 247 | -0.000081 | -0.001751 | -0.000858 | -0.001211 | -0.001108 | -0.002830 | -0.008012 | -0.005566 | -0.002162 | 0.001615  | -0.004793 | -0.001752 |
| 248 | 0.000023  | -0.000486 | -0.000030 | -0.000066 | -0.000343 | -0.000651 | -0.001728 | -0.001144 | -0.000277 | 0.000830  | -0.000072 | -0.001274 |

|     |           |           |           |           |           |           |           |           |           |           |           |           |
|-----|-----------|-----------|-----------|-----------|-----------|-----------|-----------|-----------|-----------|-----------|-----------|-----------|
| 249 | 0.000003  | -0.000546 | 0.000129  | 0.000122  | -0.000288 | -0.000519 | -0.001174 | -0.001025 | 0.000042  | 0.000525  | 0.001434  | -0.002235 |
| 250 | 0.000011  | 0.000045  | 0.000099  | 0.000120  | 0.000063  | 0.000165  | 0.000509  | 0.000283  | -0.000173 | -0.001056 | 0.002312  | -0.000252 |
| 251 | 0.000025  | -0.000010 | 0.000043  | 0.000085  | 0.000106  | 0.000212  | 0.000558  | 0.000477  | -0.000015 | -0.000782 | 0.001427  | 0.000179  |
| 252 | -0.000018 | 0.000176  | -0.000028 | -0.000041 | 0.000156  | 0.000184  | 0.000198  | -0.000034 | -0.000116 | -0.000015 | -0.000050 | 0.001085  |
| 253 | -0.000014 | 0.000156  | -0.000022 | -0.000032 | 0.000136  | 0.000160  | 0.000157  | -0.000094 | -0.000250 | -0.000193 | 0.000036  | 0.001054  |
| 254 | -0.000005 | -0.000097 | 0.000068  | 0.000048  | -0.000099 | -0.000199 | -0.000426 | -0.000089 | 0.000097  | 0.000610  | -0.001832 | -0.001552 |
| 255 | -0.000017 | -0.000041 | 0.000065  | 0.000048  | -0.000142 | -0.000181 | 0.000014  | 0.000123  | 0.000188  | 0.000574  | -0.002347 | -0.001536 |
| 256 | 0.000022  | 0.000285  | -0.000045 | 0.000077  | 0.000408  | 0.000927  | 0.001939  | 0.001463  | 0.001285  | -0.000018 | 0.005102  | 0.000796  |
| 257 | 0.000048  | 0.000252  | 0.000033  | 0.000146  | 0.000277  | 0.000653  | 0.001308  | 0.001164  | 0.001011  | 0.000411  | 0.004541  | 0.000828  |
| 258 | 0.000162  | -0.000145 | 0.001145  | 0.000880  | 0.000591  | 0.000460  | 0.000806  | 0.000281  | 0.000194  | -0.000181 | 0.001282  | 0.006881  |
| 259 | -0.000076 | -0.001701 | -0.002978 | -0.001797 | -0.001020 | -0.000932 | -0.002005 | -0.000408 | -0.000329 | -0.000768 | -0.002005 | -0.006511 |
| 260 | -0.000034 | -0.000012 | -0.000480 | -0.000285 | 0.000112  | 0.000132  | -0.000185 | 0.000143  | 0.000171  | -0.000123 | -0.000535 | -0.001501 |
| 261 | -0.000043 | 0.000352  | -0.000359 | -0.000302 | 0.000084  | 0.000228  | 0.000058  | 0.000226  | 0.000187  | 0.000024  | -0.000455 | -0.002184 |
| 262 | 0.000005  | 0.000309  | 0.000719  | 0.000398  | 0.000034  | -0.000016 | 0.000175  | -0.000144 | -0.000150 | 0.000230  | 0.000388  | 0.000590  |
| 263 | 0.000006  | 0.000259  | 0.000656  | 0.000382  | 0.000040  | -0.000014 | 0.000251  | -0.000098 | -0.000085 | 0.000241  | 0.000401  | 0.000898  |
| 264 | -0.000002 | -0.000267 | -0.000520 | -0.000334 | -0.000136 | -0.000099 | -0.000258 | -0.000009 | 0.000010  | -0.000161 | -0.000188 | -0.000231 |
| 265 | 0.000002  | -0.000326 | -0.000583 | -0.000359 | -0.000135 | -0.000089 | -0.000288 | 0.000000  | 0.000007  | -0.000203 | -0.000246 | -0.000305 |
| 266 | -0.000004 | 0.000081  | 0.000114  | -0.000028 | 0.000023  | -0.000040 | -0.000120 | -0.000045 | -0.000020 | 0.000009  | -0.000068 | -0.000425 |
| 267 | 0.000011  | 0.000127  | 0.000223  | 0.000017  | 0.000024  | -0.000048 | -0.000095 | -0.000079 | -0.000052 | 0.000040  | 0.000021  | 0.000023  |
| 268 | -0.000028 | 0.001100  | 0.001312  | 0.000806  | 0.000119  | 0.000215  | 0.001073  | 0.000075  | 0.000029  | 0.000689  | 0.001016  | 0.001408  |
| 269 | 0.000000  | 0.000223  | 0.000754  | 0.000623  | 0.000262  | 0.000200  | 0.000586  | 0.000055  | 0.000034  | 0.000200  | 0.000385  | 0.001350  |
| 270 | -0.000251 | -0.006501 | -0.004128 | 0.002272  | -0.001351 | -0.005480 | -0.001427 | -0.001883 | -0.000735 | -0.000932 | -0.001021 | -0.000723 |
| 271 | -0.000349 | 0.001720  | -0.008158 | -0.003005 | -0.002043 | 0.001215  | -0.000357 | -0.000314 | -0.000507 | 0.000226  | 0.000577  | 0.001658  |
| 272 | 0.000340  | 0.002461  | 0.004529  | -0.000188 | 0.001530  | 0.002358  | 0.000605  | 0.001278  | 0.000838  | 0.000216  | 0.000075  | 0.000280  |
| 273 | 0.000223  | 0.002325  | 0.004604  | -0.000364 | 0.001222  | 0.001816  | 0.000662  | 0.001130  | 0.000704  | 0.000266  | 0.000115  | -0.000224 |
| 274 | -0.000180 | 0.000818  | -0.001826 | 0.000731  | 0.000683  | 0.000789  | 0.000103  | 0.000111  | -0.000082 | -0.000017 | -0.000024 | -0.000010 |
| 275 | -0.000036 | -0.000117 | -0.001539 | 0.000815  | 0.000290  | 0.000228  | 0.000054  | -0.000138 | -0.000160 | 0.000026  | 0.000039  | -0.000149 |
| 276 | -0.000052 | -0.002379 | -0.000877 | 0.000054  | -0.001655 | -0.002183 | -0.000468 | -0.001101 | -0.000662 | -0.000106 | 0.000073  | -0.000317 |
| 277 | -0.000077 | -0.002133 | -0.000821 | 0.000252  | -0.001386 | -0.001953 | -0.000419 | -0.000980 | -0.000592 | -0.000128 | 0.000035  | -0.000219 |
| 278 | 0.000095  | 0.001750  | 0.001879  | -0.000864 | 0.000560  | 0.001230  | 0.000470  | 0.000708  | 0.000466  | 0.000137  | 0.000092  | 0.000256  |
| 279 | 0.000068  | 0.001881  | 0.002526  | -0.001290 | 0.000484  | 0.001263  | 0.000430  | 0.000808  | 0.000513  | 0.000122  | 0.000056  | 0.000269  |
| 280 | 0.000068  | 0.000853  | 0.003083  | 0.000868  | 0.001291  | 0.000586  | 0.000349  | 0.000293  | 0.000059  | 0.000025  | -0.000023 | -0.000462 |
| 281 | 0.000150  | -0.000651 | 0.000814  | 0.000734  | 0.000399  | 0.000162  | 0.000004  | 0.000101  | 0.000162  | 0.000169  | 0.000010  | -0.000352 |
| 282 | 0.000020  | -0.002027 | 0.000609  | 0.001185  | 0.001266  | 0.010132  | -0.000046 | 0.010630  | -0.000402 | 0.000490  | 0.002484  | 0.000392  |
| 283 | 0.000001  | 0.000883  | 0.000421  | 0.000512  | 0.000929  | 0.001828  | 0.000126  | -0.001657 | -0.001149 | -0.000290 | 0.000013  | -0.000227 |
| 284 | -0.000010 | -0.000263 | -0.000320 | -0.000503 | -0.000060 | 0.000582  | 0.001026  | -0.000200 | 0.000161  | 0.000582  | 0.000753  | 0.000210  |
| 285 | 0.000003  | 0.000529  | 0.000004  | -0.000198 | -0.000238 | -0.000856 | 0.000281  | -0.001379 | 0.000007  | -0.000132 | -0.000272 | -0.000186 |
| 286 | 0.000013  | 0.000488  | 0.000398  | 0.000299  | 0.000013  | -0.000875 | -0.000771 | 0.000450  | 0.000042  | -0.000558 | -0.000872 | -0.000410 |
| 287 | -0.000003 | 0.001170  | 0.000446  | 0.000880  | 0.000636  | 0.001384  | 0.000382  | -0.002947 | -0.001441 | -0.000303 | -0.000449 | -0.000678 |
| 288 | -0.000015 | -0.000724 | -0.000792 | -0.000936 | -0.000539 | -0.000806 | -0.000834 | -0.001077 | -0.000114 | 0.000206  | -0.010764 | 0.004027  |
| 289 | -0.000086 | 0.000121  | -0.000020 | -0.000045 | -0.000047 | 0.000086  | 0.000627  | 0.000222  | 0.000411  | 0.000722  | 0.001408  | 0.000017  |
| 290 | 0.000048  | 0.000063  | -0.000020 | -0.000032 | -0.000054 | -0.000142 | -0.000656 | -0.000573 | -0.000467 | -0.000135 | 0.000413  | -0.000019 |
| 291 | 0.000033  | 0.000080  | 0.000162  | 0.000161  | 0.000023  | 0.000042  | 0.000037  | 0.000134  | 0.000224  | 0.000131  | 0.001631  | -0.000954 |
| 292 | 0.000010  | -0.000019 | 0.000066  | 0.000147  | 0.000150  | 0.000297  | 0.000730  | 0.000651  | 0.000527  | -0.000022 | -0.000436 | -0.000423 |
| 293 | -0.000004 | 0.000171  | 0.000110  | 0.000157  | 0.000050  | 0.000299  | 0.000334  | 0.000632  | 0.000459  | 0.001050  | 0.002353  | -0.000455 |
| 294 | -0.000036 | 0.000823  | 0.000501  | -0.000057 | 0.000497  | 0.000392  | -0.000124 | 0.000335  | 0.000372  | 0.000284  | 0.000393  | -0.000878 |
| 295 | -0.000013 | -0.000207 | -0.000123 | -0.000113 | -0.000082 | -0.000076 | 0.000313  | 0.000163  | 0.000241  | 0.000220  | 0.000301  | 0.000414  |
| 296 | 0.000003  | 0.000041  | 0.000211  | 0.000116  | 0.000081  | 0.000035  | -0.000081 | -0.000061 | -0.000140 | -0.000138 | -0.000217 | -0.000725 |
| 297 | -0.000004 | -0.000161 | 0.000004  | 0.000073  | -0.000046 | -0.000097 | 0.000006  | -0.000128 | -0.000145 | -0.000127 | -0.000067 | 0.000158  |
| 298 | 0.000001  | -0.000027 | -0.000271 | -0.000074 | -0.000050 | 0.000030  | 0.000044  | 0.000077  | 0.000052  | 0.000008  | 0.000060  | 0.000736  |

|     |           |           |           |           |           |           |           |           |           |           |           |           |
|-----|-----------|-----------|-----------|-----------|-----------|-----------|-----------|-----------|-----------|-----------|-----------|-----------|
| 299 | -0.000004 | 0.000035  | -0.000069 | 0.000158  | 0.000045  | 0.000074  | 0.000062  | -0.000040 | -0.000080 | -0.000132 | -0.000075 | -0.000204 |
| 300 | -0.000088 | -0.000688 | -0.011248 | 0.000310  | -0.000525 | -0.002596 | -0.000339 | -0.000617 | -0.000515 | -0.000547 | -0.000592 | -0.001738 |
| 301 | 0.000029  | -0.001362 | -0.003567 | -0.001385 | -0.001144 | -0.001176 | -0.000419 | -0.000583 | -0.000108 | -0.000122 | -0.000127 | -0.000106 |
| 302 | 0.000021  | 0.000814  | -0.000063 | 0.000173  | 0.000650  | 0.000847  | 0.000108  | 0.000239  | 0.000084  | 0.000107  | 0.000071  | 0.000068  |
| 303 | 0.000062  | -0.000026 | 0.001176  | -0.000062 | 0.000185  | 0.000290  | 0.000032  | 0.000046  | 0.000088  | 0.000123  | 0.000137  | 0.000301  |
| 304 | 0.000086  | -0.001008 | 0.000495  | -0.000064 | -0.000584 | -0.000753 | 0.000033  | -0.000313 | -0.000178 | -0.000037 | 0.000043  | 0.000168  |
| 305 | 0.000218  | -0.000989 | -0.002084 | -0.001046 | -0.000755 | -0.000629 | 0.000003  | -0.000101 | 0.000140  | 0.000152  | 0.000162  | 0.000506  |
| 306 | 0.000023  | 0.014527  | 0.011581  | 0.011096  | 0.001910  | 0.032316  | -0.011090 | -0.038929 | -0.004817 | -0.010979 | -0.012174 | -0.003746 |
| 307 | 0.000022  | 0.001597  | 0.000984  | 0.000692  | 0.000209  | 0.002985  | -0.000107 | 0.000517  | -0.001389 | -0.000775 | -0.000232 | -0.000788 |
| 308 | -0.000002 | -0.001581 | -0.000674 | -0.000537 | 0.000295  | 0.001671  | 0.001149  | 0.001513  | 0.000589  | 0.000923  | 0.001224  | 0.000616  |
| 309 | -0.000009 | -0.000417 | 0.000122  | 0.000132  | -0.000064 | 0.000204  | -0.000691 | 0.002165  | 0.000313  | -0.000028 | 0.000174  | 0.000156  |
| 310 | 0.000006  | 0.000651  | 0.000029  | -0.000093 | -0.000453 | -0.001685 | -0.000264 | -0.000765 | 0.000284  | -0.000261 | -0.000519 | -0.000094 |
| 311 | -0.000005 | -0.000531 | -0.000565 | -0.000826 | -0.000198 | 0.000315  | 0.001522  | -0.002090 | -0.000225 | 0.000662  | 0.000662  | 0.000143  |
| 312 | -0.000013 | 0.000267  | 0.000110  | 0.000632  | 0.000214  | -0.003411 | -0.001565 | -0.001280 | 0.000421  | -0.000500 | -0.001258 | -0.000013 |
| 313 | -0.000173 | 0.002605  | 0.000266  | 0.001167  | 0.002154  | 0.006841  | 0.019726  | 0.014679  | 0.013723  | 0.002342  | 0.039496  | -0.000693 |
| 314 | 0.000027  | -0.000150 | 0.000088  | 0.000148  | 0.000045  | 0.000208  | 0.000960  | 0.000508  | 0.000989  | 0.000830  | -0.001173 | -0.001084 |
| 315 | -0.000005 | -0.000029 | -0.000239 | -0.000342 | -0.000267 | -0.000473 | -0.001349 | -0.000882 | -0.000751 | -0.000160 | -0.000726 | 0.001534  |
| 316 | 0.000001  | -0.000095 | -0.000099 | -0.000093 | 0.000037  | 0.000002  | 0.000257  | -0.000116 | -0.000063 | -0.000405 | -0.002313 | 0.000614  |
| 317 | 0.000020  | -0.000050 | 0.000133  | 0.000144  | 0.000041  | 0.000007  | 0.000129  | 0.000202  | 0.000141  | -0.000186 | 0.000690  | -0.001117 |
| 318 | 0.000037  | 0.000201  | 0.000067  | 0.000069  | -0.000011 | -0.000026 | -0.000796 | -0.000501 | -0.000487 | 0.000269  | 0.002326  | -0.000037 |
| 319 | -0.000079 | 0.000112  | 0.000043  | 0.000065  | 0.000146  | 0.000262  | 0.000744  | 0.000749  | 0.000153  | -0.000340 | 0.001163  | 0.000088  |
| 320 | -0.000011 | -0.002130 | -0.000799 | -0.000086 | -0.002431 | -0.002704 | 0.002376  | -0.000719 | 0.000616  | 0.002216  | 0.005360  | 0.018179  |
| 321 | -0.000024 | -0.000222 | -0.000145 | 0.000032  | 0.000043  | -0.000059 | 0.000155  | 0.000005  | -0.000066 | -0.000118 | 0.000000  | 0.000873  |
| 322 | -0.000006 | 0.000238  | 0.000462  | 0.000134  | 0.000134  | 0.000054  | -0.000054 | -0.000015 | -0.000003 | 0.000031  | 0.000029  | -0.001214 |
| 323 | 0.000007  | 0.000143  | -0.000132 | -0.000172 | 0.000024  | 0.000105  | -0.000098 | 0.000111  | 0.000132  | 0.000107  | 0.000040  | 0.000112  |
| 324 | 0.000004  | -0.000146 | -0.000053 | 0.000029  | -0.000073 | -0.000109 | -0.000011 | -0.000089 | -0.000092 | -0.000068 | -0.000030 | 0.000578  |
| 325 | -0.000004 | -0.000098 | 0.000302  | 0.000238  | 0.000063  | -0.000045 | -0.000020 | -0.000183 | -0.000283 | -0.000249 | -0.000345 | -0.001157 |
| 326 | 0.000023  | 0.000075  | -0.000439 | -0.000263 | -0.000193 | 0.000049  | 0.000020  | 0.000166  | 0.000307  | 0.000291  | 0.000293  | 0.000775  |
| 327 | 0.000423  | -0.019095 | -0.039293 | -0.003424 | -0.013718 | -0.017783 | -0.001533 | -0.006233 | -0.001228 | -0.000622 | 0.000606  | 0.004751  |
| 328 | 0.000164  | -0.001798 | -0.002093 | 0.000337  | -0.000746 | -0.001489 | -0.000085 | -0.000655 | -0.000348 | -0.000105 | 0.000003  | -0.000086 |
| 329 | -0.000085 | 0.001408  | -0.002088 | -0.000195 | 0.000713  | 0.000714  | -0.000023 | 0.000300  | 0.000152  | 0.000002  | -0.000093 | -0.000366 |
| 330 | -0.000065 | -0.000119 | -0.000263 | 0.000371  | -0.000116 | -0.000411 | 0.000003  | -0.000097 | -0.000164 | -0.000105 | -0.000082 | -0.000259 |
| 331 | 0.000001  | -0.000128 | 0.001972  | 0.000142  | 0.000167  | 0.000394  | 0.000000  | 0.000120  | 0.000093  | 0.000035  | 0.000023  | 0.000237  |
| 332 | 0.000032  | 0.001513  | 0.001565  | 0.000702  | 0.001002  | 0.001298  | 0.000299  | 0.000372  | 0.000125  | 0.000205  | 0.000207  | 0.000120  |
| 333 | -0.000048 | -0.000832 | 0.000954  | -0.001359 | -0.001001 | -0.000464 | -0.000189 | -0.000026 | 0.000148  | -0.000026 | -0.000053 | 0.000361  |

|    | 145       | 146       | 147       | 148       | 149       | 150       | 151       | 152       | 153       | 154       | 155       | 156       |
|----|-----------|-----------|-----------|-----------|-----------|-----------|-----------|-----------|-----------|-----------|-----------|-----------|
| 1  | 0.004213  | -0.000978 | -0.006969 | -0.004450 | 0.024821  | 0.002593  | -0.010295 | -0.009576 | 0.002807  | -0.006851 | -0.009059 | -0.001167 |
| 2  | -0.010823 | -0.003957 | 0.001617  | 0.000822  | -0.028404 | 0.000597  | 0.001322  | -0.001236 | -0.009461 | -0.002739 | -0.005135 | -0.004798 |
| 3  | 0.015855  | 0.004964  | -0.002284 | -0.003930 | 0.011181  | -0.010127 | -0.016589 | -0.007366 | 0.015183  | -0.020949 | 0.014507  | -0.011500 |
| 4  | 0.027217  | -0.007480 | -0.008002 | 0.000282  | 0.000554  | -0.010114 | -0.001649 | 0.007910  | 0.013992  | 0.003008  | 0.009152  | -0.011488 |
| 5  | 0.000970  | 0.003142  | -0.003101 | -0.008051 | -0.033924 | 0.003809  | -0.004300 | 0.003168  | 0.009664  | -0.014896 | 0.017524  | 0.006562  |
| 6  | 0.001326  | -0.001115 | -0.008441 | 0.000269  | -0.028685 | -0.026174 | 0.001138  | 0.003726  | 0.005477  | -0.009105 | 0.004652  | -0.016701 |
| 7  | -0.009826 | 0.001674  | 0.007430  | -0.002962 | -0.013196 | 0.004744  | 0.020753  | 0.020166  | 0.002074  | 0.003297  | 0.012628  | 0.012015  |
| 8  | 0.008439  | 0.001789  | -0.001873 | -0.003100 | 0.022923  | -0.010896 | -0.030559 | -0.023052 | 0.002066  | 0.008946  | 0.008457  | -0.009768 |
| 9  | 0.002016  | 0.001087  | 0.002978  | 0.003841  | 0.008121  | 0.006450  | 0.008973  | 0.003717  | 0.006001  | -0.032139 | 0.002755  | 0.007123  |
| 10 | 0.004023  | -0.000082 | -0.005372 | -0.006038 | -0.011746 | -0.011878 | -0.008508 | -0.000465 | 0.001184  | 0.024067  | 0.008843  | -0.007792 |
| 11 | 0.012318  | -0.014225 | 0.001157  | 0.004916  | 0.002958  | 0.001320  | 0.001325  | 0.003231  | 0.004817  | -0.003739 | -0.005556 | -0.001695 |
| 12 | -0.015459 | 0.022852  | -0.010578 | -0.017921 | -0.005272 | -0.003691 | -0.006937 | -0.006168 | -0.000864 | -0.002646 | 0.006585  | -0.005615 |



|    |           |           |           |           |           |           |           |           |           |           |           |           |
|----|-----------|-----------|-----------|-----------|-----------|-----------|-----------|-----------|-----------|-----------|-----------|-----------|
| 13 | 0.026852  | -0.006005 | -0.009252 | -0.003671 | -0.011374 | 0.011755  | 0.027214  | 0.033424  | 0.008514  | -0.008050 | 0.006216  | 0.017574  |
| 14 | -0.001141 | 0.005926  | -0.003720 | -0.002857 | 0.051724  | -0.016318 | -0.034653 | -0.045206 | 0.002328  | 0.003180  | 0.000083  | -0.030498 |
| 15 | -0.003378 | -0.002375 | -0.000944 | 0.003724  | -0.051387 | 0.001970  | 0.043545  | 0.041460  | 0.003583  | -0.005000 | -0.006796 | 0.011345  |
| 16 | 0.004558  | 0.001695  | 0.000967  | 0.000761  | 0.000384  | -0.002577 | -0.012268 | -0.008344 | -0.007792 | 0.015610  | 0.005761  | -0.003279 |
| 17 | 0.002009  | 0.000310  | -0.006236 | -0.007264 | 0.002655  | -0.008527 | -0.006699 | -0.004345 | -0.000590 | 0.008127  | 0.007417  | -0.005928 |
| 18 | -0.000006 | 0.000315  | 0.000860  | 0.002657  | 0.001287  | 0.003007  | 0.004970  | 0.001363  | 0.004902  | -0.022789 | -0.002922 | 0.002839  |
| 19 | 0.001982  | 0.001908  | -0.004248 | -0.007846 | -0.001079 | -0.002224 | -0.004381 | -0.002553 | -0.000760 | 0.007439  | 0.011045  | -0.005093 |
| 20 | -0.009991 | -0.002428 | -0.008300 | -0.018266 | 0.002897  | -0.008482 | -0.005567 | 0.003421  | 0.005275  | 0.007755  | -0.011120 | -0.010824 |
| 21 | -0.003930 | -0.004116 | 0.003888  | 0.006686  | 0.004275  | 0.004217  | 0.005558  | 0.004085  | 0.001678  | -0.000425 | -0.011493 | 0.005247  |
| 22 | -0.068741 | 0.005593  | 0.018434  | -0.019415 | 0.000193  | -0.007814 | -0.007819 | -0.009465 | -0.006591 | 0.007510  | -0.003491 | -0.000926 |
| 23 | 0.019523  | -0.015469 | 0.028677  | 0.044440  | -0.002265 | -0.006003 | 0.012041  | 0.007408  | 0.002166  | -0.010463 | 0.011067  | 0.018913  |
| 24 | 0.059028  | -0.007954 | -0.003504 | 0.010543  | 0.008429  | 0.010097  | 0.010078  | 0.016388  | 0.009711  | -0.007962 | 0.003210  | -0.002112 |
| 25 | 0.008521  | 0.005227  | -0.003421 | 0.003214  | 0.097141  | 0.017921  | -0.038919 | -0.041399 | 0.033474  | 0.000064  | 0.005742  | -0.025581 |
| 26 | 0.007939  | 0.003304  | 0.003083  | -0.009775 | -0.068472 | 0.004415  | -0.007578 | -0.009694 | 0.021759  | -0.006584 | 0.007467  | 0.002509  |
| 27 | -0.005524 | -0.001647 | -0.000433 | 0.001918  | -0.078772 | -0.011943 | 0.046854  | 0.039891  | -0.039564 | 0.000295  | -0.004707 | 0.018388  |
| 28 | 0.008883  | -0.000884 | -0.003370 | -0.009331 | 0.016440  | -0.002339 | 0.002479  | 0.003301  | 0.011974  | -0.027119 | 0.014296  | -0.002605 |
| 29 | 0.011808  | 0.000721  | -0.008542 | -0.015554 | -0.005632 | -0.014984 | -0.011328 | 0.000434  | 0.007988  | 0.001862  | 0.014489  | -0.014035 |
| 30 | 0.000387  | -0.007254 | -0.000432 | -0.013929 | 0.012151  | -0.003501 | 0.000658  | 0.007623  | 0.005117  | 0.006909  | -0.025049 | -0.003206 |
| 31 | -0.036057 | 0.027665  | -0.004242 | -0.011346 | -0.001212 | -0.005500 | -0.000014 | 0.000244  | -0.000703 | 0.004120  | -0.013891 | 0.000622  |
| 32 | 0.052661  | 0.011002  | -0.024805 | -0.001617 | 0.055636  | -0.024795 | 0.030063  | 0.047144  | 0.036179  | -0.013340 | 0.023357  | -0.006472 |
| 33 | 0.037382  | 0.014411  | -0.005228 | -0.035361 | 0.096204  | -0.012980 | -0.031346 | -0.006206 | 0.029521  | -0.005452 | 0.019350  | -0.032662 |
| 34 | -0.000049 | 0.000584  | 0.002982  | -0.001936 | -0.047470 | -0.000520 | 0.029137  | 0.036598  | -0.021841 | -0.002034 | -0.000298 | 0.003649  |
| 35 | 0.006608  | 0.004155  | -0.004077 | -0.004806 | 0.008030  | -0.013246 | -0.019340 | -0.017201 | 0.001474  | 0.001172  | 0.009784  | -0.006407 |
| 36 | -0.000570 | -0.000138 | -0.000075 | 0.000008  | -0.001557 | -0.000189 | 0.000228  | 0.000285  | -0.000965 | 0.000213  | -0.001023 | -0.000075 |
| 37 | -0.000971 | -0.000207 | 0.000164  | 0.000146  | 0.000036  | 0.000443  | 0.000370  | 0.000287  | 0.000334  | -0.000086 | -0.001026 | 0.000361  |
| 38 | -0.000281 | 0.000034  | 0.000308  | 0.000814  | 0.000305  | 0.000649  | 0.000328  | 0.000054  | 0.000018  | -0.000990 | -0.000561 | 0.000906  |
| 39 | -0.000636 | 0.000257  | -0.000066 | -0.000165 | -0.000181 | 0.000282  | -0.000142 | -0.000318 | -0.000316 | 0.000872  | 0.003530  | 0.000106  |
| 40 | 0.000257  | -0.002043 | 0.000866  | 0.000179  | -0.000094 | 0.000999  | 0.000156  | -0.000069 | -0.000250 | 0.000923  | 0.001226  | 0.000181  |
| 41 | -0.005397 | -0.001713 | 0.002092  | -0.004678 | 0.000330  | 0.000345  | -0.000369 | -0.000700 | -0.000441 | 0.000718  | -0.001391 | -0.002913 |
| 42 | -0.001594 | -0.000818 | 0.000554  | -0.001413 | -0.001827 | 0.002954  | 0.002437  | 0.001405  | -0.001785 | 0.000568  | -0.001078 | 0.000738  |
| 43 | -0.000545 | -0.000211 | -0.000117 | -0.000289 | 0.003796  | -0.000541 | -0.002103 | -0.002829 | -0.002502 | 0.001066  | -0.000628 | -0.000789 |
| 44 | 0.002803  | 0.000414  | -0.001085 | -0.001601 | -0.002099 | -0.002697 | -0.001888 | 0.000012  | 0.000626  | 0.007433  | 0.002962  | -0.002146 |
| 45 | 0.011023  | -0.001023 | 0.001857  | -0.000639 | 0.000455  | -0.001903 | -0.000658 | 0.001210  | 0.001652  | -0.002046 | -0.015114 | -0.002226 |
| 46 | 0.007305  | 0.005656  | -0.000208 | 0.019186  | 0.002651  | -0.014772 | 0.001496  | 0.001382  | 0.003234  | -0.002104 | 0.003267  | 0.004877  |
| 47 | 0.002157  | 0.000911  | -0.000672 | -0.000108 | 0.000004  | -0.000129 | 0.000778  | -0.002736 | 0.014364  | -0.001735 | 0.001596  | -0.001501 |
| 48 | -0.002013 | -0.000710 | -0.001172 | -0.003949 | 0.004292  | 0.002934  | 0.006240  | 0.006161  | 0.003349  | -0.001076 | 0.003050  | -0.001647 |
| 49 | 0.000973  | 0.000700  | 0.000626  | 0.000525  | -0.000332 | -0.000344 | -0.000759 | -0.000641 | -0.000350 | 0.001008  | 0.000968  | 0.000484  |
| 50 | 0.000554  | -0.000161 | -0.000858 | 0.000487  | 0.000983  | -0.000559 | -0.004006 | -0.004254 | -0.001062 | 0.000326  | -0.003166 | -0.002943 |
| 51 | 0.001713  | 0.000825  | 0.000590  | 0.001033  | -0.002522 | -0.001638 | -0.001497 | -0.000861 | -0.000847 | -0.000130 | 0.001044  | 0.000395  |
| 52 | -0.003479 | -0.001457 | -0.001494 | -0.003477 | 0.005149  | 0.003004  | 0.006768  | 0.006649  | 0.003394  | -0.002484 | 0.002416  | 0.000348  |
| 53 | 0.002423  | -0.000163 | -0.000209 | 0.000923  | -0.001119 | -0.000636 | -0.000993 | -0.001408 | -0.000787 | -0.000228 | -0.000324 | -0.000763 |
| 54 | 0.000037  | 0.000090  | 0.000165  | 0.000103  | -0.000084 | 0.000107  | 0.000258  | 0.000291  | 0.000039  | 0.000045  | 0.000321  | 0.000383  |
| 55 | 0.000045  | 0.000087  | 0.000236  | 0.000211  | 0.000243  | 0.000148  | -0.000014 | -0.000177 | -0.000113 | 0.000575  | 0.000359  | 0.000473  |
| 56 | 0.000721  | 0.000165  | -0.000284 | 0.000065  | -0.000446 | -0.000464 | -0.001270 | -0.000761 | 0.000634  | -0.000708 | -0.000217 | -0.000241 |
| 57 | -0.000074 | -0.000022 | -0.000029 | -0.000013 | 0.000012  | -0.000016 | -0.000007 | -0.000002 | -0.000082 | 0.000016  | -0.000103 | -0.000020 |
| 58 | -0.000161 | -0.000048 | 0.000097  | -0.000011 | -0.000572 | -0.000173 | 0.000020  | -0.000027 | -0.000174 | -0.000045 | -0.000055 | -0.000173 |
| 59 | -0.000196 | -0.000055 | -0.000058 | -0.000226 | -0.000181 | -0.000082 | 0.000125  | 0.000118  | 0.000118  | 0.000118  | 0.000014  | -0.000203 |
| 60 | -0.000146 | 0.000880  | -0.000317 | -0.002558 | -0.004217 | -0.002539 | 0.001360  | 0.002952  | 0.000032  | 0.001165  | 0.001846  | 0.000602  |
| 61 | 0.026202  | 0.001497  | -0.015190 | 0.004029  | -0.027883 | 0.016087  | -0.045477 | -0.041900 | 0.027138  | 0.007260  | -0.002142 | -0.003335 |
| 62 | 0.014038  | -0.011946 | -0.007772 | -0.007110 | 0.016399  | 0.001693  | -0.005447 | -0.009832 | 0.005726  | 0.003476  | -0.009299 | -0.014471 |

|     |           |           |           |           |           |           |           |           |           |           |           |           |
|-----|-----------|-----------|-----------|-----------|-----------|-----------|-----------|-----------|-----------|-----------|-----------|-----------|
| 63  | 0.007153  | 0.004322  | -0.004615 | 0.009941  | -0.029058 | 0.024330  | -0.043131 | -0.044412 | 0.019558  | 0.000121  | -0.011052 | -0.001125 |
| 64  | 0.033270  | -0.011557 | -0.018154 | -0.006011 | 0.030096  | 0.007504  | -0.011245 | -0.010258 | 0.018987  | 0.001523  | -0.011379 | -0.005065 |
| 65  | 0.001147  | -0.001758 | 0.008701  | 0.005787  | 0.024750  | -0.024047 | 0.038829  | 0.039671  | -0.022115 | -0.005823 | 0.007453  | 0.004854  |
| 66  | -0.038267 | 0.008888  | 0.016212  | 0.005275  | -0.030349 | 0.000437  | 0.011615  | 0.010176  | -0.013501 | -0.001305 | 0.008824  | 0.006557  |
| 67  | -0.034052 | -0.004054 | 0.011468  | -0.019566 | 0.031007  | -0.016075 | 0.049756  | 0.046711  | -0.024389 | -0.001764 | 0.006357  | -0.000445 |
| 68  | -0.008689 | 0.014591  | 0.009772  | 0.008875  | -0.015605 | -0.009749 | 0.005210  | 0.010001  | -0.010974 | -0.003755 | 0.011989  | 0.013230  |
| 69  | -0.010524 | 0.000319  | -0.002693 | -0.015087 | 0.013023  | -0.004244 | 0.002735  | 0.003172  | -0.004522 | 0.000749  | -0.004536 | -0.002325 |
| 70  | -0.006408 | -0.000193 | -0.002473 | 0.010196  | 0.014299  | -0.004965 | 0.004888  | 0.001812  | -0.004419 | 0.003426  | -0.007856 | 0.004026  |
| 71  | 0.008700  | -0.000213 | 0.006136  | 0.013027  | 0.001053  | 0.001094  | 0.003872  | 0.005280  | 0.007109  | -0.005338 | 0.011874  | 0.002478  |
| 72  | 0.000958  | 0.001684  | 0.003230  | -0.008117 | -0.027425 | 0.003597  | -0.001861 | -0.000528 | -0.004642 | 0.000011  | 0.003666  | -0.001981 |
| 73  | 0.006808  | 0.000962  | 0.005877  | 0.006336  | 0.008161  | 0.005026  | -0.011124 | -0.006631 | 0.005374  | 0.010531  | 0.001057  | 0.000845  |
| 74  | 0.000998  | 0.000657  | -0.000717 | -0.001871 | 0.006541  | -0.001807 | -0.004096 | -0.004350 | -0.002702 | -0.000968 | 0.004330  | -0.000960 |
| 75  | -0.000021 | 0.000316  | -0.000591 | -0.000499 | 0.007537  | -0.000117 | 0.000766  | -0.002188 | 0.001213  | -0.013882 | 0.001376  | 0.000719  |
| 76  | -0.002595 | -0.000915 | 0.004133  | 0.005680  | -0.005579 | 0.004056  | 0.006544  | 0.006582  | 0.006826  | -0.015584 | -0.009905 | 0.004217  |
| 77  | 0.010028  | 0.002500  | 0.001102  | 0.008129  | -0.014948 | 0.000895  | -0.002637 | -0.005345 | -0.003168 | 0.004958  | 0.026545  | 0.001287  |
| 78  | 0.001151  | -0.000882 | -0.002709 | -0.008493 | 0.002385  | -0.003168 | -0.002998 | -0.000108 | 0.000155  | 0.001948  | -0.001606 | -0.004649 |
| 79  | -0.000673 | -0.002357 | -0.000496 | -0.003626 | 0.002572  | -0.001993 | -0.000757 | 0.001327  | 0.000553  | 0.003465  | -0.006697 | -0.001377 |
| 80  | 0.018061  | -0.007131 | 0.010020  | 0.033248  | -0.006331 | 0.006413  | 0.007645  | 0.000724  | 0.000330  | -0.006229 | 0.005624  | 0.012050  |
| 81  | -0.057254 | 0.028044  | -0.006087 | -0.070534 | 0.001227  | 0.000162  | -0.014168 | -0.006350 | -0.002104 | 0.012324  | -0.028013 | -0.020148 |
| 82  | -0.015124 | -0.005275 | -0.006624 | 0.016372  | -0.002753 | -0.009955 | 0.002519  | -0.002138 | -0.004038 | -0.001310 | 0.007708  | 0.007102  |
| 83  | 0.025384  | -0.004002 | -0.011134 | 0.027036  | -0.000150 | -0.002353 | 0.007147  | 0.004936  | 0.000683  | -0.005987 | 0.010973  | 0.005924  |
| 84  | 0.043707  | 0.013434  | -0.008986 | -0.065577 | -0.019388 | 0.033688  | 0.002589  | 0.012945  | 0.009566  | 0.000111  | 0.001656  | -0.007907 |
| 85  | -0.006016 | -0.000868 | -0.004916 | 0.030307  | 0.134860  | -0.027678 | -0.015213 | -0.007564 | 0.006893  | 0.006224  | -0.008126 | -0.014270 |
| 86  | 0.003665  | 0.001915  | 0.001123  | -0.007509 | -0.005813 | 0.008812  | -0.013028 | -0.015060 | 0.018205  | -0.002191 | 0.003026  | -0.013333 |
| 87  | -0.001196 | -0.000359 | 0.002531  | -0.008870 | -0.057498 | 0.000163  | 0.009028  | 0.002971  | -0.008080 | -0.001768 | 0.000070  | 0.001387  |
| 88  | -0.013394 | -0.004312 | -0.006492 | 0.007255  | 0.026372  | -0.004846 | 0.033830  | 0.029789  | -0.036486 | 0.005635  | -0.013371 | 0.016481  |
| 89  | 0.002951  | -0.000628 | 0.000105  | -0.001348 | 0.004208  | 0.000955  | 0.000954  | -0.000967 | 0.003579  | -0.017877 | 0.004847  | 0.000463  |
| 90  | -0.034158 | 0.009275  | -0.005018 | -0.005948 | 0.000306  | -0.000996 | 0.000466  | -0.002480 | -0.003310 | 0.001358  | -0.001862 | 0.000006  |
| 91  | 0.020897  | 0.003281  | -0.013143 | -0.010393 | 0.034414  | 0.013450  | -0.012032 | 0.001324  | 0.016669  | -0.001762 | 0.005201  | -0.021865 |
| 92  | -0.002926 | -0.001117 | 0.002953  | -0.002192 | -0.014497 | -0.005613 | 0.004535  | 0.012052  | -0.030688 | -0.000161 | -0.001972 | -0.000102 |
| 93  | -0.000688 | -0.000320 | 0.000832  | 0.001651  | -0.002441 | 0.001667  | 0.002198  | 0.001804  | 0.001357  | 0.000839  | -0.002521 | 0.001023  |
| 94  | -0.000309 | -0.000328 | -0.000104 | 0.000241  | -0.004101 | 0.000156  | 0.001895  | 0.002542  | 0.001316  | 0.000106  | -0.001786 | -0.000046 |
| 95  | -0.000095 | -0.000108 | 0.000185  | -0.000073 | -0.003682 | -0.000259 | -0.000319 | 0.001358  | -0.000352 | 0.006217  | -0.000335 | -0.000574 |
| 96  | 0.000032  | -0.000091 | 0.000571  | 0.000818  | -0.003481 | 0.000587  | -0.000235 | 0.000815  | -0.000949 | 0.006882  | -0.000881 | 0.000118  |
| 97  | 0.000066  | 0.000512  | 0.001744  | 0.004967  | -0.001396 | 0.001973  | 0.001524  | -0.000314 | -0.000657 | 0.000707  | 0.001211  | 0.002803  |
| 98  | -0.001260 | 0.000367  | 0.001032  | 0.003532  | -0.000917 | 0.001187  | 0.001589  | 0.000537  | 0.000478  | -0.002901 | 0.000291  | 0.001886  |
| 99  | 0.000547  | 0.001385  | -0.000473 | 0.000723  | -0.001309 | 0.000353  | -0.000254 | -0.000801 | 0.000104  | -0.001668 | 0.005314  | -0.000079 |
| 100 | 0.000376  | 0.000974  | 0.000889  | 0.002930  | -0.001417 | 0.001702  | 0.000746  | -0.000776 | -0.000639 | -0.001593 | 0.001906  | 0.001423  |
| 101 | 0.009873  | -0.001512 | 0.005327  | -0.010778 | 0.000998  | 0.004984  | -0.001535 | 0.000562  | 0.001431  | 0.001126  | -0.004108 | -0.003302 |
| 102 | 0.006612  | -0.001369 | 0.001734  | -0.007958 | 0.001425  | 0.004747  | -0.000935 | 0.001419  | 0.002439  | 0.000174  | -0.003237 | -0.003832 |
| 103 | -0.014380 | 0.001198  | 0.003956  | -0.015616 | 0.000229  | 0.000860  | -0.003792 | -0.002534 | -0.000196 | 0.002509  | -0.004985 | -0.004088 |
| 104 | -0.011214 | 0.002882  | 0.004790  | -0.011049 | 0.000029  | 0.001570  | -0.003336 | -0.002334 | -0.000465 | 0.003464  | -0.006027 | -0.001714 |
| 105 | -0.001765 | -0.000767 | -0.000527 | 0.004952  | 0.006556  | -0.006170 | 0.008615  | 0.006423  | -0.008956 | 0.001448  | -0.001614 | 0.006426  |
| 106 | -0.001874 | -0.001161 | -0.000626 | 0.002409  | -0.000190 | -0.003253 | 0.006999  | 0.008325  | -0.008860 | 0.000786  | -0.001380 | 0.006616  |
| 107 | 0.000963  | 0.000159  | -0.001382 | 0.003347  | 0.027565  | -0.001024 | -0.006377 | -0.003618 | 0.002811  | 0.000616  | 0.000238  | -0.001838 |
| 108 | 0.000142  | 0.000122  | -0.000957 | 0.005550  | 0.028892  | 0.000135  | -0.002087 | -0.004031 | 0.006317  | 0.001095  | -0.000401 | 0.000674  |
| 109 | -0.002666 | 0.000170  | -0.000177 | -0.000040 | -0.003484 | -0.001042 | -0.000702 | -0.000150 | -0.003570 | -0.014959 | -0.002515 | -0.001353 |
| 110 | -0.000116 | 0.000464  | 0.000112  | 0.001386  | -0.000539 | 0.000033  | -0.000165 | 0.001179  | 0.000136  | 0.039164  | -0.001973 | 0.000861  |
| 111 | 0.008737  | -0.005987 | 0.000147  | 0.000999  | -0.000715 | 0.000571  | -0.000293 | 0.000772  | 0.000967  | -0.000266 | -0.022203 | -0.000961 |
| 112 | 0.023578  | -0.002935 | 0.004652  | 0.004626  | 0.000151  | 0.000431  | -0.000284 | 0.001530  | 0.002442  | -0.001715 | 0.013536  | 0.000770  |

|     |           |           |           |           |           |           |           |           |           |           |           |           |
|-----|-----------|-----------|-----------|-----------|-----------|-----------|-----------|-----------|-----------|-----------|-----------|-----------|
| 113 | -0.003747 | 0.000642  | 0.005552  | 0.019660  | -0.017527 | 0.007509  | 0.008745  | 0.005681  | -0.005194 | 0.001985  | -0.002060 | 0.034615  |
| 114 | -0.016659 | -0.003907 | 0.007284  | -0.008615 | -0.017156 | -0.020182 | 0.002822  | -0.007201 | -0.010941 | -0.000248 | -0.003055 | -0.007932 |
| 115 | 0.003208  | 0.001234  | -0.001254 | 0.003095  | 0.000100  | 0.007229  | 0.003953  | -0.003171 | 0.028613  | -0.000465 | 0.002153  | 0.002492  |
| 116 | -0.000230 | -0.000218 | -0.001562 | -0.001267 | 0.014860  | -0.002555 | -0.008088 | -0.008040 | 0.000374  | 0.000184  | -0.000101 | -0.002802 |
| 117 | -0.000981 | 0.002072  | -0.000093 | -0.008997 | 0.006545  | 0.000794  | -0.000733 | 0.000439  | 0.002914  | 0.002837  | -0.000095 | -0.000871 |
| 118 | 0.001206  | 0.000230  | -0.000752 | -0.001162 | 0.000916  | -0.000833 | -0.003944 | -0.004066 | -0.000794 | 0.000893  | -0.002548 | -0.003101 |
| 119 | 0.002022  | 0.000516  | -0.000230 | 0.002128  | -0.000398 | -0.001356 | -0.005609 | -0.005497 | -0.001956 | 0.001077  | -0.002731 | -0.002000 |
| 120 | -0.000302 | -0.000296 | -0.000795 | -0.001372 | 0.001394  | 0.000251  | -0.000328 | -0.000363 | 0.000135  | -0.000043 | -0.000528 | -0.001596 |
| 121 | 0.000224  | 0.000240  | 0.000543  | 0.000780  | -0.000812 | -0.000115 | 0.000156  | 0.000193  | -0.000086 | 0.000132  | 0.000357  | 0.000962  |
| 122 | 0.000082  | 0.000055  | 0.000247  | 0.000591  | -0.000556 | -0.000128 | 0.000181  | 0.000176  | -0.000045 | -0.000101 | 0.000163  | 0.000642  |
| 123 | 0.000214  | -0.000143 | -0.000827 | -0.000635 | 0.002092  | 0.000409  | -0.000171 | 0.000023  | 0.000956  | -0.000945 | -0.000412 | -0.001103 |
| 124 | -0.000421 | -0.000082 | 0.000394  | 0.000197  | -0.000889 | -0.000055 | 0.000379  | 0.000051  | -0.000333 | 0.000480  | 0.000132  | 0.000457  |
| 125 | 0.000194  | 0.000225  | 0.000440  | 0.000436  | -0.001244 | -0.000370 | -0.000220 | -0.000082 | -0.000626 | 0.000491  | 0.000295  | 0.000632  |
| 126 | 0.002342  | 0.000500  | -0.000407 | 0.001707  | -0.000794 | -0.001952 | -0.006137 | -0.005670 | -0.002211 | 0.000090  | -0.002944 | -0.001886 |
| 127 | 0.001209  | 0.000067  | -0.000860 | 0.000527  | 0.000300  | -0.001366 | -0.004148 | -0.004036 | -0.000565 | -0.000447 | -0.002818 | -0.002101 |
| 128 | 0.000070  | 0.000025  | -0.000066 | 0.000006  | 0.000086  | 0.000001  | -0.000145 | -0.000059 | -0.000091 | -0.000005 | -0.000061 | -0.000062 |
| 129 | -0.000028 | 0.000009  | 0.000137  | 0.000140  | -0.000389 | -0.000120 | 0.000052  | -0.000091 | -0.000210 | 0.000116  | -0.000035 | 0.000027  |
| 130 | -0.000236 | -0.000077 | 0.000024  | -0.000227 | -0.000209 | -0.000013 | 0.000123  | 0.000066  | 0.000091  | 0.000168  | 0.000077  | -0.000175 |
| 131 | 0.000013  | 0.000025  | -0.000063 | 0.000032  | 0.000403  | 0.000097  | 0.000014  | 0.000024  | -0.000025 | -0.000407 | -0.000140 | 0.000098  |
| 132 | 0.000023  | -0.000032 | -0.000031 | -0.000054 | -0.000129 | -0.000025 | 0.000011  | 0.000078  | 0.000140  | 0.000306  | 0.000166  | -0.000035 |
| 133 | 0.000161  | 0.000051  | -0.000007 | 0.000104  | 0.000251  | 0.000062  | -0.000057 | -0.000016 | 0.000097  | -0.000184 | -0.000008 | 0.000150  |
| 134 | 0.010796  | 0.002645  | 0.009207  | 0.019213  | 0.023918  | 0.003083  | 0.009814  | -0.004182 | -0.003622 | -0.015893 | 0.011324  | 0.012198  |
| 135 | -0.002772 | 0.001107  | -0.004812 | 0.005363  | -0.000703 | 0.020745  | -0.005170 | -0.014065 | 0.050597  | 0.034902  | -0.003398 | 0.007220  |
| 136 | 0.000258  | 0.004042  | 0.004619  | 0.008942  | -0.000279 | 0.006324  | -0.000959 | -0.001617 | -0.012113 | -0.010025 | 0.009768  | 0.007292  |
| 137 | -0.003011 | 0.004216  | 0.005938  | 0.008810  | 0.013363  | 0.007577  | 0.007602  | -0.000533 | -0.003192 | -0.028025 | 0.005742  | 0.009443  |
| 138 | 0.003465  | -0.000952 | -0.001125 | -0.004387 | 0.003324  | -0.003669 | 0.002581  | 0.002529  | 0.020190  | 0.058208  | 0.006295  | -0.002713 |
| 139 | -0.002429 | -0.000802 | 0.005920  | 0.001947  | 0.000545  | 0.010638  | 0.008926  | 0.009066  | 0.009522  | -0.011141 | -0.015065 | 0.009172  |
| 140 | 0.020526  | -0.000014 | -0.000415 | -0.003546 | 0.010371  | -0.004662 | -0.001121 | -0.002073 | 0.002302  | 0.060519  | 0.034474  | -0.002738 |
| 141 | -0.005073 | -0.000286 | 0.007908  | 0.000737  | 0.008506  | -0.000935 | 0.013463  | 0.013685  | -0.002818 | -0.028884 | -0.012241 | 0.004790  |
| 142 | -0.013101 | -0.000163 | 0.004223  | -0.001461 | 0.008101  | -0.003298 | 0.013904  | 0.013081  | -0.000957 | -0.010673 | -0.027485 | 0.001714  |
| 143 | 0.050395  | -0.002695 | 0.004725  | 0.006181  | 0.009251  | -0.001530 | -0.001793 | -0.000984 | -0.005350 | 0.037779  | 0.058314  | 0.001697  |
| 144 | -0.059579 | 0.038085  | -0.033956 | -0.064194 | 0.039486  | 0.000289  | -0.000815 | 0.020096  | 0.008621  | 0.013038  | -0.029306 | -0.025118 |
| 145 | 0.424493  | -0.037604 | 0.032680  | 0.053030  | 0.004660  | 0.019271  | 0.002596  | 0.004955  | -0.002120 | 0.008399  | 0.051958  | 0.030260  |
| 146 | -0.037604 | 0.244142  | -0.012103 | 0.065195  | 0.009039  | 0.006014  | -0.001303 | 0.004289  | 0.004557  | 0.000273  | -0.009878 | 0.000947  |
| 147 | 0.032680  | -0.012103 | 0.392237  | -0.057794 | -0.016932 | -0.012081 | -0.002983 | -0.010516 | -0.003260 | 0.002012  | 0.006140  | -0.018970 |
| 148 | 0.053030  | 0.065195  | -0.057794 | 0.363627  | 0.003589  | 0.035021  | -0.014607 | -0.001501 | 0.026170  | -0.000070 | 0.009096  | 0.040507  |
| 149 | 0.004660  | 0.009039  | -0.016932 | 0.003589  | 0.242449  | -0.058745 | 0.054627  | 0.056563  | -0.049300 | 0.009164  | 0.007362  | -0.017015 |
| 150 | 0.019271  | 0.006014  | -0.012081 | 0.035021  | -0.058745 | 0.420669  | -0.060342 | 0.039661  | 0.050478  | -0.002710 | -0.000185 | 0.048065  |
| 151 | 0.002596  | -0.001303 | -0.002983 | -0.014607 | 0.054627  | -0.060342 | 0.275611  | -0.030746 | 0.038427  | 0.004339  | 0.003176  | -0.028777 |
| 152 | 0.004955  | 0.004289  | -0.010516 | -0.001501 | 0.056563  | 0.039661  | -0.030746 | 0.275713  | -0.057357 | 0.003095  | 0.005050  | -0.012194 |
| 153 | -0.002120 | 0.004557  | -0.003260 | 0.026170  | -0.049300 | 0.050478  | 0.038427  | -0.057357 | 0.427746  | 0.007169  | -0.002877 | 0.033006  |
| 154 | 0.008399  | 0.000273  | 0.002012  | -0.000070 | 0.009164  | -0.002710 | 0.004339  | 0.003095  | 0.007169  | 0.355413  | 0.017833  | -0.001469 |
| 155 | 0.051958  | -0.009878 | 0.006140  | 0.009096  | 0.007362  | -0.000185 | 0.003176  | 0.005050  | -0.002877 | 0.017833  | 0.340585  | 0.005312  |
| 156 | 0.030260  | 0.000947  | -0.018970 | 0.040507  | -0.017015 | 0.048065  | -0.028777 | -0.012194 | 0.033006  | -0.001469 | 0.005312  | 0.339165  |
| 157 | -0.001782 | 0.003323  | -0.004526 | 0.012129  | -0.015677 | 0.031200  | -0.013248 | -0.027850 | 0.056233  | 0.014747  | -0.002719 | 0.013724  |
| 158 | -0.000244 | 0.000036  | 0.000122  | -0.001032 | 0.000199  | 0.000141  | 0.000430  | 0.000379  | -0.000217 | -0.000555 | 0.000378  | -0.000219 |
| 159 | -0.001242 | 0.000359  | 0.001168  | 0.000489  | -0.007246 | -0.002438 | -0.002442 | -0.001769 | -0.000999 | 0.003620  | 0.002124  | -0.002301 |
| 160 | -0.001720 | 0.000066  | 0.000936  | -0.000329 | -0.005502 | -0.002133 | -0.001678 | -0.001035 | -0.000432 | 0.003537  | 0.002085  | -0.001786 |
| 161 | 0.001016  | -0.000027 | -0.000229 | 0.000233  | 0.000932  | -0.000118 | -0.000169 | -0.000066 | 0.000407  | 0.001283  | -0.000130 | 0.000576  |
| 162 | -0.002658 | -0.000541 | -0.000438 | -0.000653 | 0.004898  | -0.000132 | 0.001164  | 0.001348  | 0.002317  | -0.000036 | -0.001369 | -0.000671 |

|     |           |           |           |            |           |           |           |           |           |           |           |           |
|-----|-----------|-----------|-----------|------------|-----------|-----------|-----------|-----------|-----------|-----------|-----------|-----------|
| 163 | 0.008225  | 0.000733  | -0.002274 | 0.001336   | 0.002941  | -0.002790 | -0.003620 | -0.000685 | 0.003693  | 0.000862  | 0.002109  | 0.000707  |
| 164 | -0.003101 | 0.006409  | 0.005755  | 0.012374   | -0.003247 | 0.011967  | -0.000833 | -0.000897 | -0.012209 | -0.018690 | 0.010970  | 0.012559  |
| 165 | -0.002370 | 0.000373  | 0.000101  | 0.002085   | 0.003977  | 0.004159  | 0.001234  | -0.004297 | 0.006850  | -0.012860 | -0.002675 | 0.001902  |
| 166 | 0.004519  | -0.005883 | -0.008511 | -0.009801  | -0.012339 | -0.004190 | -0.008718 | -0.001569 | 0.015309  | 0.032430  | -0.010933 | -0.010167 |
| 167 | -0.018896 | -0.000231 | 0.009541  | -0.003323  | 0.015080  | -0.004453 | 0.020564  | 0.019946  | -0.005440 | -0.036042 | -0.021621 | 0.004312  |
| 168 | -0.007286 | 0.001203  | -0.002355 | -0.001662  | -0.000127 | -0.001420 | 0.000190  | -0.000170 | 0.002148  | 0.012665  | -0.012183 | -0.001195 |
| 169 | 0.016672  | -0.000131 | -0.007099 | 0.000295   | -0.013718 | 0.005920  | -0.020939 | -0.019968 | 0.005616  | 0.019435  | 0.034625  | -0.003840 |
| 170 | 0.057121  | -0.027005 | 0.082825  | 0.071582   | -0.008703 | 0.020274  | -0.005973 | -0.012989 | -0.005579 | -0.006606 | 0.040052  | 0.038153  |
| 171 | 0.118854  | -0.014952 | 0.198380  | -0.126626  | -0.025145 | -0.009040 | 0.003056  | -0.013736 | -0.014029 | -0.002827 | 0.033196  | -0.003951 |
| 172 | 0.038699  | 0.078038  | -0.124290 | 0.065929   | 0.011873  | 0.014017  | 0.003521  | 0.005671  | -0.005024 | -0.003581 | 0.011029  | 0.027953  |
| 173 | 0.005929  | -0.001428 | -0.004733 | -0.017486  | 0.069053  | -0.069538 | 0.075672  | -0.082323 | -0.024452 | 0.003114  | 0.006481  | -0.035387 |
| 174 | 0.003854  | 0.001856  | -0.005771 | 0.003722   | -0.002279 | 0.121983  | -0.048581 | 0.046401  | -0.126050 | -0.001761 | -0.000072 | 0.010176  |
| 175 | -0.000554 | -0.003649 | 0.012911  | 0.010106   | -0.072842 | 0.024435  | 0.085055  | -0.073787 | 0.070162  | -0.005549 | -0.005464 | 0.020333  |
| 176 | -0.011858 | -0.003244 | 0.000529  | -0.009746  | 0.013246  | -0.013153 | 0.010510  | 0.007316  | 0.010700  | -0.015471 | -0.015721 | -0.012119 |
| 177 | -0.010782 | -0.000821 | 0.001031  | 0.004591   | 0.004589  | -0.002555 | 0.006317  | 0.005210  | 0.006939  | 0.012544  | -0.032410 | 0.005909  |
| 178 | -0.055677 | -0.000430 | -0.009912 | -0.007612  | -0.007553 | -0.006119 | -0.007709 | -0.008617 | 0.000281  | 0.035468  | -0.000336 | -0.006371 |
| 179 | -0.062576 | 0.015333  | -0.038917 | -0.026865  | -0.013234 | 0.001181  | -0.009069 | -0.010554 | 0.011698  | 0.009047  | 0.020685  | -0.015748 |
| 180 | 0.070181  | 0.014488  | -0.074424 | 0.030325   | -0.027468 | -0.064640 | 0.003748  | -0.011959 | -0.015954 | -0.007536 | 0.014768  | -0.022275 |
| 181 | 0.019350  | 0.021035  | -0.024481 | 0.053028   | 0.015692  | -0.076624 | 0.051844  | -0.001810 | -0.072432 | 0.010109  | 0.004608  | 0.000643  |
| 182 | -0.008168 | 0.008196  | -0.002684 | 0.023198   | -0.008099 | 0.075576  | 0.004081  | -0.050890 | 0.074421  | -0.007751 | -0.006087 | 0.036219  |
| 183 | -0.001167 | 0.003152  | 0.004485  | 0.008737   | 0.030626  | 0.017676  | 0.015650  | 0.000286  | 0.063380  | -0.033239 | 0.008305  | 0.011066  |
| 184 | -0.001330 | -0.000052 | 0.000804  | -0.000146  | -0.005207 | -0.002930 | -0.002023 | -0.000887 | 0.000140  | 0.002654  | 0.001684  | -0.001165 |
| 185 | -0.002235 | 0.000396  | 0.001580  | 0.000229   | -0.010018 | -0.003012 | -0.002980 | -0.002370 | -0.001395 | 0.004719  | 0.002533  | -0.002987 |
| 186 | -0.000274 | -0.000106 | -0.000134 | -0.000750  | 0.001420  | 0.000457  | 0.000668  | 0.000651  | 0.000357  | -0.000979 | 0.000209  | 0.000000  |
| 187 | 0.002422  | -0.000117 | -0.001269 | 0.000496   | 0.007913  | 0.002764  | 0.002413  | 0.001620  | 0.000361  | -0.004902 | -0.002954 | 0.002755  |
| 188 | 0.001472  | -0.000120 | -0.001024 | 0.000034   | 0.006209  | 0.002776  | 0.001969  | 0.001026  | 0.000586  | -0.001616 | -0.001569 | 0.001471  |
| 189 | 0.000039  | 0.000045  | 0.000001  | 0.000013   | 0.000216  | 0.000081  | 0.000044  | 0.000033  | 0.000096  | 0.000034  | 0.000063  | 0.000153  |
| 190 | 0.000890  | 0.000060  | 0.000079  | 0.000102   | 0.000000  | 0.000234  | 0.000424  | 0.000695  | 0.000959  | 0.001055  | 0.001245  | 0.000433  |
| 191 | 0.002368  | 0.000569  | -0.000744 | 0.000217   | 0.001164  | -0.000275 | -0.000334 | 0.000907  | 0.001818  | 0.003658  | 0.002102  | 0.000949  |
| 192 | -0.000916 | -0.000196 | 0.000218  | 0.000154   | 0.000208  | 0.000302  | 0.000268  | -0.000306 | -0.000229 | 0.006335  | -0.000746 | 0.000081  |
| 193 | -0.000706 | -0.000088 | -0.000047 | -0.000334  | 0.000073  | 0.000071  | 0.000137  | 0.000102  | -0.000170 | -0.012028 | -0.000932 | -0.000241 |
| 194 | -0.000298 | -0.000104 | 0.000065  | -0.000188  | -0.000145 | 0.000097  | 0.000208  | 0.000005  | 0.000023  | 0.006698  | -0.000174 | -0.000225 |
| 195 | -0.002243 | -0.000649 | 0.000546  | -0.000184  | -0.001716 | 0.000010  | 0.000096  | -0.000455 | -0.001904 | -0.003098 | -0.002281 | -0.000664 |
| 196 | -0.000397 | -0.000022 | -0.000182 | -0.000290  | 0.000211  | -0.000049 | 0.000004  | 0.000022  | 0.000025  | -0.001850 | -0.000195 | -0.000142 |
| 197 | 0.000047  | 0.000009  | 0.000004  | 0.000013   | -0.000033 | -0.000048 | -0.000059 | -0.000076 | -0.000030 | -0.000256 | 0.000035  | -0.000007 |
| 198 | -0.000055 | -0.000014 | 0.000012  | 0.000021   | 0.000028  | 0.000017  | 0.000013  | -0.000002 | 0.000007  | 0.000032  | -0.000063 | 0.000016  |
| 199 | -0.000160 | -0.000040 | 0.000049  | 0.000022   | -0.000038 | 0.000011  | 0.000006  | -0.000067 | -0.000109 | 0.000349  | -0.000183 | -0.000015 |
| 200 | -0.000133 | -0.000053 | 0.000057  | 0.000034   | 0.000196  | 0.000169  | 0.000198  | 0.000104  | 0.000070  | 0.000920  | -0.000080 | 0.000140  |
| 201 | 0.002597  | -0.002339 | -0.003085 | -0.0000975 | -0.000528 | -0.000684 | -0.000549 | -0.000258 | -0.000335 | -0.001397 | -0.000691 | -0.000766 |
| 202 | 0.002776  | -0.001420 | -0.001490 | 0.000055   | 0.000142  | -0.000202 | -0.000250 | 0.000159  | 0.000318  | 0.000242  | 0.007157  | -0.000019 |
| 203 | -0.003485 | 0.000750  | 0.000015  | -0.000581  | -0.000263 | -0.000544 | -0.000227 | -0.000285 | -0.000172 | -0.000495 | -0.011055 | -0.000443 |
| 204 | 0.001605  | -0.001252 | -0.002167 | -0.000565  | 0.000048  | -0.000186 | -0.000227 | 0.000059  | 0.000113  | 0.000153  | 0.009204  | -0.000145 |
| 205 | -0.001592 | 0.001873  | 0.003373  | 0.002160   | 0.000634  | 0.001347  | 0.000819  | -0.000194 | -0.000383 | 0.001607  | -0.001383 | 0.001639  |
| 206 | -0.001380 | 0.000540  | 0.001039  | 0.001844   | 0.000219  | 0.000613  | 0.000304  | 0.000207  | 0.000134  | 0.000888  | -0.003646 | 0.000562  |
| 207 | -0.000756 | -0.000834 | -0.000693 | -0.000188  | -0.000024 | 0.000028  | 0.000065  | 0.000077  | 0.000061  | -0.000027 | 0.000597  | -0.000130 |
| 208 | 0.000527  | -0.000221 | -0.000163 | -0.000104  | 0.000015  | -0.000056 | -0.000055 | -0.000023 | 0.000026  | -0.000087 | 0.000371  | -0.000049 |
| 209 | 0.000193  | -0.000133 | -0.000092 | -0.000051  | 0.000011  | 0.000006  | 0.000001  | 0.000000  | 0.000018  | 0.000053  | 0.000137  | 0.000006  |
| 210 | -0.000291 | 0.000226  | 0.000372  | 0.000183   | -0.000054 | -0.000017 | -0.000006 | -0.000041 | -0.000033 | 0.000078  | -0.000658 | 0.000014  |
| 211 | -0.000108 | 0.001744  | 0.001876  | 0.000325   | -0.000012 | 0.000107  | 0.000161  | -0.000097 | -0.000117 | 0.000076  | -0.000518 | 0.000225  |
| 212 | -0.002785 | -0.001069 | -0.000144 | 0.004535   | -0.002398 | -0.000065 | -0.000279 | -0.001090 | -0.002746 | -0.000027 | -0.001052 | 0.002664  |

|     |           |           |           |           |           |           |           |           |           |           |           |           |
|-----|-----------|-----------|-----------|-----------|-----------|-----------|-----------|-----------|-----------|-----------|-----------|-----------|
| 213 | -0.001401 | -0.001052 | -0.000311 | 0.000272  | -0.003276 | 0.001932  | -0.001445 | -0.002044 | -0.001283 | -0.000652 | -0.001061 | 0.002816  |
| 214 | -0.001463 | -0.000749 | 0.000958  | -0.003026 | 0.000804  | -0.001508 | 0.000994  | 0.000994  | -0.000287 | -0.000220 | -0.000275 | -0.010603 |
| 215 | 0.000556  | -0.000699 | -0.001233 | 0.000774  | 0.000666  | 0.003982  | -0.000888 | 0.000354  | 0.001315  | 0.000587  | 0.000570  | 0.011119  |
| 216 | -0.000088 | 0.000498  | 0.001681  | -0.000826 | 0.000197  | -0.002715 | 0.000709  | 0.000775  | 0.000156  | 0.000164  | 0.000074  | -0.006770 |
| 217 | 0.002324  | 0.000112  | 0.000469  | 0.001850  | -0.000951 | -0.003529 | -0.000027 | 0.000662  | 0.000818  | 0.000218  | 0.000632  | -0.002648 |
| 218 | 0.000436  | -0.000254 | -0.000735 | -0.000737 | 0.000811  | 0.000329  | -0.001149 | -0.000541 | 0.000199  | -0.000019 | 0.000275  | 0.001340  |
| 219 | -0.000111 | -0.000043 | -0.000120 | 0.000229  | 0.000008  | 0.000270  | -0.000107 | -0.000092 | -0.000085 | 0.000025  | -0.000039 | 0.000844  |
| 220 | -0.000213 | -0.000152 | -0.000053 | -0.000099 | -0.000200 | -0.000239 | 0.000057  | -0.000039 | -0.000035 | 0.000001  | -0.000116 | -0.000157 |
| 221 | 0.000393  | 0.000210  | 0.000024  | -0.000272 | 0.000145  | -0.000267 | 0.000121  | 0.000167  | 0.000283  | -0.000004 | 0.000087  | -0.000119 |
| 222 | 0.000075  | 0.000847  | 0.001504  | -0.000933 | -0.000357 | 0.000519  | 0.000833  | 0.000562  | 0.000096  | -0.000073 | 0.000254  | -0.001938 |
| 223 | 0.000170  | 0.000265  | 0.000217  | 0.001336  | 0.002385  | 0.003477  | 0.001439  | 0.000570  | 0.001091  | 0.001037  | 0.000184  | 0.001607  |
| 224 | -0.000278 | -0.000141 | -0.000133 | -0.000384 | 0.000457  | -0.001042 | 0.000191  | 0.001448  | -0.002760 | -0.000491 | -0.000202 | -0.000744 |
| 225 | -0.000055 | -0.000071 | -0.000045 | 0.000016  | -0.001856 | 0.000058  | -0.001098 | -0.001178 | 0.001249  | 0.000650  | 0.000180  | 0.000105  |
| 226 | -0.000132 | -0.000091 | 0.000038  | -0.000534 | -0.000621 | -0.001198 | -0.000468 | 0.000638  | -0.004540 | -0.000131 | -0.000162 | -0.000595 |
| 227 | 0.000350  | 0.000177  | -0.000414 | -0.000438 | -0.001818 | -0.000663 | -0.001320 | -0.000977 | 0.001706  | -0.000487 | -0.000214 | -0.000618 |
| 228 | -0.000532 | -0.000253 | -0.000002 | -0.000204 | 0.001737  | -0.000321 | -0.000255 | -0.000167 | 0.005260  | 0.000226  | -0.000174 | 0.000216  |
| 229 | -0.000051 | -0.000025 | 0.000158  | 0.000067  | -0.000626 | 0.000212  | 0.001081  | 0.001473  | -0.000411 | 0.000172  | 0.000078  | 0.000149  |
| 230 | -0.000007 | 0.000014  | 0.000034  | 0.000130  | 0.000346  | 0.000368  | 0.000287  | 0.000134  | 0.000103  | 0.000149  | -0.000009 | 0.000191  |
| 231 | 0.000016  | -0.000005 | 0.000004  | 0.000017  | 0.000071  | -0.000022 | -0.000024 | -0.000087 | 0.000334  | 0.000100  | 0.000043  | 0.000061  |
| 232 | 0.000016  | -0.000005 | -0.000028 | -0.000040 | -0.000080 | -0.000170 | -0.000076 | -0.000131 | 0.000486  | -0.000033 | 0.000002  | -0.000064 |
| 233 | 0.000074  | 0.000013  | 0.000015  | 0.000062  | -0.000143 | -0.000060 | -0.000397 | -0.000569 | -0.000586 | 0.000210  | 0.000204  | -0.000048 |
| 234 | -0.003330 | -0.000764 | 0.000042  | -0.001836 | -0.003021 | -0.000849 | -0.000554 | -0.000979 | -0.002990 | -0.002094 | -0.003489 | -0.002858 |
| 235 | 0.006274  | 0.001115  | -0.000188 | 0.001988  | 0.001318  | -0.000192 | -0.000453 | 0.001081  | 0.003192  | 0.013885  | 0.006919  | 0.002671  |
| 236 | 0.000061  | 0.000024  | -0.000064 | 0.000215  | 0.000463  | 0.000191  | 0.000243  | 0.000354  | 0.000562  | 0.006710  | 0.000181  | 0.000544  |
| 237 | 0.000001  | 0.000123  | -0.000144 | 0.000369  | 0.001488  | 0.000481  | 0.000307  | 0.000231  | 0.000638  | 0.006511  | -0.000325 | 0.000788  |
| 238 | -0.000313 | -0.000049 | 0.000018  | -0.000226 | -0.000220 | -0.000064 | -0.000016 | -0.000118 | -0.000118 | -0.010260 | -0.000363 | -0.000315 |
| 239 | -0.000350 | -0.000042 | 0.000027  | -0.000185 | -0.000063 | 0.000026  | 0.000063  | -0.000060 | -0.000095 | -0.008318 | -0.000429 | -0.000248 |
| 240 | 0.000794  | 0.000154  | -0.000127 | 0.000077  | 0.000085  | -0.000172 | -0.000216 | 0.000059  | 0.000205  | 0.002668  | 0.000881  | 0.000090  |
| 241 | 0.000899  | 0.000190  | -0.000159 | 0.000078  | 0.000138  | -0.000177 | -0.000229 | 0.000088  | 0.000289  | 0.003051  | 0.001008  | 0.000119  |
| 242 | -0.000262 | -0.000032 | 0.000037  | 0.000123  | 0.000162  | 0.000067  | 0.000030  | -0.000122 | -0.000062 | 0.005659  | -0.000316 | 0.000117  |
| 243 | -0.000280 | -0.000028 | -0.000005 | 0.000073  | 0.000139  | 0.000043  | 0.000006  | -0.000141 | -0.000031 | 0.008159  | -0.000372 | 0.000078  |
| 244 | -0.001914 | -0.000371 | 0.000355  | -0.000280 | -0.000295 | 0.000344  | 0.000368  | -0.000409 | -0.001022 | -0.014203 | -0.002047 | -0.000543 |
| 245 | -0.001587 | -0.000322 | 0.000207  | -0.000400 | -0.000200 | 0.000299  | 0.000449  | 0.000015  | -0.000569 | -0.011840 | -0.001653 | -0.000450 |
| 246 | -0.004008 | -0.001726 | 0.002490  | 0.003643  | 0.001744  | 0.002508  | 0.001286  | 0.000842  | 0.000481  | 0.002989  | -0.004351 | 0.002366  |
| 247 | 0.011538  | 0.001583  | 0.000821  | 0.000363  | -0.000999 | -0.001415 | -0.000857 | -0.000588 | -0.000311 | -0.002579 | 0.005426  | -0.000584 |
| 248 | -0.003236 | 0.000008  | -0.001328 | -0.001480 | -0.000524 | -0.000755 | -0.000347 | -0.000057 | -0.000018 | -0.000913 | -0.008654 | -0.001124 |
| 249 | -0.003515 | 0.000382  | -0.001587 | -0.001908 | -0.000672 | -0.001158 | -0.000677 | -0.000172 | -0.000003 | -0.001073 | -0.009894 | -0.001295 |
| 250 | 0.002353  | -0.001053 | -0.001224 | -0.000634 | 0.000016  | -0.000061 | -0.000048 | -0.000002 | 0.000018  | 0.000172  | 0.009161  | -0.000100 |
| 251 | 0.001626  | -0.001057 | -0.001185 | -0.000573 | 0.000110  | 0.000040  | 0.000012  | 0.000012  | 0.000000  | 0.000179  | 0.007086  | 0.000035  |
| 252 | 0.000665  | 0.000358  | 0.001341  | 0.001152  | 0.000284  | 0.000410  | 0.000227  | 0.000064  | 0.000051  | 0.000267  | 0.001873  | 0.000660  |
| 253 | 0.000552  | 0.000114  | 0.001122  | 0.001080  | 0.000262  | 0.000384  | 0.000215  | 0.000075  | 0.000056  | 0.000232  | 0.001675  | 0.000604  |
| 254 | -0.001472 | 0.000958  | 0.000057  | -0.000727 | -0.000234 | -0.000499 | -0.000266 | -0.000097 | 0.000005  | -0.000462 | -0.008664 | -0.000558 |
| 255 | -0.002400 | 0.001157  | 0.000265  | -0.000611 | -0.000274 | -0.000521 | -0.000272 | -0.000102 | -0.000011 | -0.000325 | -0.010893 | -0.000530 |
| 256 | -0.000996 | -0.000311 | -0.000515 | 0.000009  | 0.000240  | 0.000597  | 0.000387  | -0.000017 | -0.000153 | 0.000824  | 0.009456  | 0.000429  |
| 257 | -0.001072 | -0.000418 | -0.000273 | -0.000326 | 0.000049  | 0.000468  | 0.000337  | 0.000044  | -0.000110 | 0.000691  | 0.007896  | 0.000162  |
| 258 | 0.006734  | 0.001655  | -0.002978 | 0.003056  | 0.003037  | -0.011590 | -0.003985 | -0.000557 | 0.002190  | 0.001529  | 0.002411  | -0.004741 |
| 259 | -0.004290 | 0.001066  | 0.003639  | 0.007854  | -0.006370 | 0.002962  | 0.003363  | -0.001851 | -0.004884 | -0.002752 | -0.002471 | 0.004436  |
| 260 | -0.002107 | -0.001284 | 0.000214  | -0.004245 | -0.001382 | 0.000779  | 0.000777  | -0.000450 | -0.000954 | -0.000308 | -0.001014 | -0.009336 |
| 261 | -0.002025 | -0.001403 | 0.000501  | -0.005125 | -0.000955 | 0.001679  | 0.000633  | 0.000060  | -0.000733 | -0.000121 | -0.000822 | -0.009254 |
| 262 | 0.000271  | 0.000114  | -0.000673 | 0.002664  | 0.001912  | 0.002394  | -0.000960 | 0.000557  | 0.001303  | 0.000370  | 0.000539  | 0.011910  |

|     |           |           |           |           |           |           |           |           |           |           |           |           |
|-----|-----------|-----------|-----------|-----------|-----------|-----------|-----------|-----------|-----------|-----------|-----------|-----------|
| 263 | 0.000278  | -0.000017 | -0.000779 | 0.001803  | 0.001728  | 0.001535  | -0.000762 | 0.000521  | 0.001184  | 0.000395  | 0.000551  | 0.009012  |
| 264 | 0.000365  | 0.000387  | -0.000027 | -0.000358 | -0.001288 | -0.000491 | 0.000190  | -0.000797 | -0.001100 | -0.000280 | -0.000202 | -0.001514 |
| 265 | 0.000258  | 0.000265  | -0.000165 | -0.000316 | -0.001387 | -0.000660 | -0.000044 | -0.000968 | -0.001154 | -0.000284 | -0.000248 | -0.001748 |
| 266 | -0.000430 | -0.000080 | 0.000764  | -0.001336 | 0.000540  | -0.001133 | 0.000746  | 0.000640  | 0.000523  | -0.000234 | -0.000098 | -0.007165 |
| 267 | -0.000078 | 0.000091  | 0.000945  | -0.001818 | 0.001102  | -0.001731 | 0.000695  | 0.000803  | 0.000822  | -0.000201 | 0.000094  | -0.008659 |
| 268 | 0.000789  | -0.000554 | -0.001093 | -0.001830 | 0.002131  | 0.004028  | -0.000268 | 0.001336  | 0.001880  | 0.001116  | 0.000851  | 0.009745  |
| 269 | 0.000206  | -0.000255 | -0.000359 | -0.000377 | 0.000953  | 0.002194  | -0.000383 | 0.000712  | 0.000932  | 0.000767  | 0.000406  | 0.007247  |
| 270 | -0.000038 | 0.000044  | -0.000402 | -0.001669 | -0.001613 | -0.001420 | 0.000559  | 0.002918  | 0.010810  | -0.002436 | -0.001250 | -0.001088 |
| 271 | 0.000640  | 0.000426  | -0.000179 | 0.002020  | 0.003874  | 0.003480  | 0.000759  | -0.002724 | -0.001791 | -0.000059 | 0.001000  | 0.001250  |
| 272 | -0.000308 | -0.000156 | 0.000479  | 0.000891  | 0.001942  | 0.001222  | 0.001039  | 0.000026  | 0.000405  | 0.001537  | 0.000445  | 0.001130  |
| 273 | -0.000421 | -0.000244 | 0.000340  | 0.000342  | 0.000197  | 0.000138  | -0.000167 | -0.000356 | -0.001101 | 0.001191  | 0.000275  | 0.000569  |
| 274 | 0.000048  | 0.000038  | 0.000030  | -0.000118 | -0.000496 | -0.000344 | 0.000023  | 0.000713  | -0.002497 | 0.000180  | -0.000080 | -0.000197 |
| 275 | 0.000104  | 0.000028  | -0.000101 | -0.000402 | -0.001227 | -0.000821 | -0.000348 | 0.000558  | -0.002025 | -0.000150 | -0.000150 | -0.000552 |
| 276 | 0.000185  | 0.000078  | -0.000351 | -0.000492 | -0.000880 | -0.000414 | -0.000489 | -0.000371 | -0.000894 | -0.001241 | -0.000233 | -0.000739 |
| 277 | 0.000182  | 0.000086  | -0.000274 | -0.000358 | -0.000579 | -0.000216 | -0.000219 | -0.000145 | -0.000695 | -0.001108 | -0.000193 | -0.000543 |
| 278 | -0.000136 | -0.000086 | 0.000286  | 0.000467  | 0.000543  | 0.000240  | 0.000129  | -0.000549 | 0.002266  | 0.000872  | 0.000377  | 0.000625  |
| 279 | -0.000153 | -0.000093 | 0.000289  | 0.000492  | 0.000470  | 0.000281  | 0.000233  | -0.000432 | 0.003327  | 0.000893  | 0.000369  | 0.000708  |
| 280 | -0.000102 | -0.000069 | 0.000158  | -0.000299 | -0.001060 | -0.000928 | -0.000668 | 0.000007  | -0.004497 | 0.000439  | -0.000208 | -0.000392 |
| 281 | 0.000007  | -0.000049 | -0.000274 | -0.000869 | -0.001178 | -0.001213 | -0.000854 | 0.000346  | -0.003277 | -0.000104 | -0.000347 | -0.000767 |
| 282 | 0.000592  | 0.000152  | 0.000330  | 0.000797  | 0.001230  | 0.000792  | 0.000455  | 0.000031  | 0.000353  | 0.018159  | 0.000111  | 0.000866  |
| 283 | 0.000006  | 0.000064  | -0.000009 | 0.000087  | 0.000167  | 0.000056  | -0.000037 | -0.000170 | 0.000085  | 0.002625  | -0.000123 | 0.000066  |
| 284 | 0.000366  | 0.000071  | -0.000023 | 0.000102  | 0.000085  | -0.000012 | -0.000064 | 0.000019  | -0.000012 | 0.000506  | 0.000452  | 0.000090  |
| 285 | -0.000086 | -0.000023 | -0.000124 | -0.000202 | -0.000176 | -0.000178 | -0.000077 | 0.000057  | 0.000096  | -0.000395 | 0.000161  | -0.000154 |
| 286 | -0.000466 | -0.000122 | -0.000017 | -0.000201 | -0.000319 | -0.000109 | 0.000032  | 0.000005  | 0.000033  | -0.001294 | -0.000332 | -0.000255 |
| 287 | -0.000225 | -0.000044 | -0.000114 | -0.000259 | -0.000396 | -0.000270 | -0.000156 | -0.000131 | 0.000004  | -0.001417 | -0.000110 | -0.000357 |
| 288 | -0.006691 | -0.000995 | -0.000119 | 0.000786  | -0.000468 | 0.000301  | 0.000443  | -0.000400 | -0.000770 | 0.000538  | -0.014653 | 0.000466  |
| 289 | -0.001086 | -0.000701 | -0.000272 | -0.000205 | -0.000103 | 0.000003  | 0.000147  | -0.000010 | -0.000072 | 0.000390  | -0.001141 | -0.000183 |
| 290 | -0.000357 | 0.000690  | 0.001261  | 0.000404  | 0.000046  | 0.000118  | 0.000070  | 0.000067  | 0.000046  | -0.000256 | 0.000421  | 0.000232  |
| 291 | 0.000374  | 0.000308  | 0.000343  | -0.000177 | 0.000023  | -0.000179 | -0.000080 | 0.000061  | 0.000120  | -0.000175 | 0.000201  | -0.000247 |
| 292 | 0.000567  | -0.000431 | -0.000930 | -0.000432 | 0.000096  | -0.000155 | -0.000129 | -0.000018 | 0.000059  | 0.000078  | 0.000518  | -0.000119 |
| 293 | -0.001189 | -0.000381 | -0.000342 | -0.000245 | -0.000035 | -0.000101 | -0.000050 | 0.000034  | 0.000089  | 0.000200  | 0.001918  | -0.000255 |
| 294 | 0.003522  | 0.001361  | -0.000493 | 0.005261  | -0.001357 | 0.010503  | 0.001583  | 0.001277  | 0.000008  | 0.000482  | -0.000083 | 0.015712  |
| 295 | 0.000740  | 0.000723  | 0.000988  | 0.000898  | -0.000329 | -0.000361 | -0.000242 | -0.000288 | -0.000004 | 0.000109  | 0.000198  | 0.001445  |
| 296 | -0.000953 | -0.000496 | 0.000172  | 0.001134  | 0.000616  | -0.000588 | 0.000012  | 0.000412  | 0.000567  | -0.000040 | -0.000144 | -0.000565 |
| 297 | -0.000522 | -0.000418 | 0.000141  | -0.000477 | 0.000048  | -0.001447 | -0.000423 | -0.000465 | -0.000118 | -0.000104 | 0.000156  | -0.000557 |
| 298 | 0.000460  | 0.000348  | 0.000107  | -0.000171 | -0.000839 | -0.000067 | -0.000145 | -0.000835 | -0.000641 | 0.000001  | 0.000122  | -0.000583 |
| 299 | -0.000163 | 0.000069  | 0.000923  | 0.001131  | -0.000438 | -0.001419 | -0.000759 | -0.000290 | -0.000384 | 0.000030  | 0.000163  | -0.001786 |
| 300 | -0.001393 | -0.000566 | 0.000185  | -0.000900 | 0.001944  | -0.001199 | -0.001790 | -0.001240 | -0.010234 | -0.000336 | -0.000918 | -0.000858 |
| 301 | -0.000096 | -0.000041 | -0.000238 | -0.000329 | -0.000427 | -0.000325 | 0.000294  | 0.000890  | 0.001212  | -0.000867 | -0.000250 | -0.000093 |
| 302 | 0.000074  | 0.000001  | -0.000006 | -0.000102 | -0.000623 | -0.000433 | -0.000445 | -0.000227 | 0.000219  | 0.000290  | 0.000092  | -0.000159 |
| 303 | 0.000200  | 0.000070  | -0.000078 | 0.000062  | -0.000308 | 0.000224  | 0.000408  | 0.000334  | 0.001296  | -0.000125 | 0.000142  | -0.000021 |
| 304 | 0.000138  | 0.000090  | 0.000039  | 0.000233  | 0.000305  | 0.000391  | 0.000518  | 0.000071  | -0.000495 | -0.000348 | 0.000076  | 0.000071  |
| 305 | 0.000345  | 0.000125  | -0.000181 | 0.000034  | 0.000197  | 0.000373  | 0.000290  | 0.001299  | 0.002361  | -0.000395 | 0.000184  | 0.000135  |
| 306 | -0.004064 | -0.000171 | -0.000604 | -0.000505 | 0.002083  | 0.001361  | 0.001562  | 0.000961  | 0.003603  | 0.005738  | -0.004542 | 0.000918  |
| 307 | -0.000372 | -0.000016 | -0.000124 | -0.000164 | -0.000125 | -0.000134 | -0.000046 | -0.000092 | 0.000298  | 0.006733  | 0.000099  | -0.000182 |
| 308 | 0.000588  | 0.000108  | 0.000104  | 0.000338  | 0.000469  | 0.000252  | 0.000085  | 0.000075  | -0.000035 | 0.002150  | 0.000269  | 0.000394  |
| 309 | 0.000010  | -0.000006 | 0.000080  | 0.000115  | 0.000117  | 0.000129  | 0.000089  | -0.000003 | -0.000025 | 0.001138  | -0.000067 | 0.000092  |
| 310 | -0.000159 | -0.000041 | -0.000067 | -0.000167 | -0.000133 | -0.000107 | -0.000021 | 0.000090  | 0.000077  | -0.001689 | -0.000008 | -0.000098 |
| 311 | 0.000319  | 0.000088  | -0.000062 | 0.000044  | -0.000069 | -0.000113 | -0.000163 | -0.000069 | -0.000153 | -0.000750 | 0.000468  | -0.000014 |
| 312 | -0.000363 | -0.000127 | 0.000071  | -0.000150 | -0.000241 | -0.000018 | 0.000060  | 0.000002  | -0.000155 | -0.007436 | -0.000742 | -0.000175 |

|     |           |           |           |           |           |           |           |           |           |           |           |           |
|-----|-----------|-----------|-----------|-----------|-----------|-----------|-----------|-----------|-----------|-----------|-----------|-----------|
| 313 | -0.025418 | -0.004946 | -0.010776 | -0.004627 | -0.000975 | 0.000201  | 0.000019  | -0.001508 | -0.001407 | 0.006967  | 0.015879  | -0.000721 |
| 314 | -0.001093 | 0.000138  | -0.000320 | -0.000557 | -0.000147 | -0.000461 | -0.000183 | -0.000142 | -0.000103 | -0.000005 | -0.005402 | -0.000466 |
| 315 | -0.001809 | 0.000012  | 0.001243  | 0.000700  | -0.000094 | 0.000358  | 0.000309  | 0.000030  | -0.000128 | 0.000073  | -0.001166 | 0.000311  |
| 316 | 0.000136  | -0.000133 | -0.000440 | 0.000111  | 0.000064  | 0.000093  | 0.000014  | -0.000051 | -0.000060 | 0.000005  | -0.001180 | 0.000246  |
| 317 | 0.001171  | 0.000320  | -0.000215 | -0.000315 | -0.000013 | -0.000238 | -0.000176 | 0.000002  | 0.000068  | -0.000209 | 0.000655  | -0.000232 |
| 318 | -0.000090 | 0.000906  | 0.001724  | 0.000460  | 0.000042  | 0.000150  | 0.000079  | 0.000104  | 0.000095  | -0.000203 | 0.001648  | 0.000118  |
| 319 | 0.001672  | -0.001218 | -0.001966 | -0.000395 | 0.000141  | 0.000091  | -0.000044 | 0.000053  | 0.000124  | 0.000320  | 0.005357  | 0.000020  |
| 320 | 0.019092  | 0.012085  | -0.003175 | 0.024717  | -0.005257 | -0.027019 | -0.001075 | -0.005841 | -0.002441 | -0.000855 | 0.006287  | 0.009937  |
| 321 | 0.000780  | 0.000300  | -0.000077 | 0.001648  | -0.001729 | 0.000684  | -0.000830 | -0.001589 | -0.000795 | -0.000051 | 0.000326  | 0.004813  |
| 322 | -0.000179 | -0.000243 | 0.000295  | 0.001459  | 0.001444  | 0.001093  | 0.000434  | 0.001356  | 0.000878  | 0.000121  | -0.000072 | 0.001890  |
| 323 | 0.000592  | 0.000342  | -0.000429 | -0.000241 | -0.000561 | 0.001930  | 0.000625  | 0.000122  | -0.000109 | 0.000051  | -0.000168 | 0.001183  |
| 324 | -0.000302 | -0.000264 | -0.000283 | -0.001244 | -0.000166 | -0.000940 | -0.000138 | -0.000445 | -0.000244 | -0.000115 | 0.000009  | -0.001405 |
| 325 | -0.001562 | -0.000861 | 0.000081  | 0.001143  | 0.0001315 | -0.002398 | -0.000742 | 0.000360  | 0.000764  | -0.000102 | 0.000025  | -0.001283 |
| 326 | 0.000621  | 0.000709  | 0.000427  | -0.002772 | -0.000292 | -0.000429 | 0.000658  | 0.000199  | -0.000494 | 0.000083  | -0.000133 | -0.005312 |
| 327 | 0.002699  | 0.001363  | -0.000452 | 0.002386  | 0.007964  | 0.007400  | 0.009517  | 0.004172  | 0.033386  | -0.008084 | 0.001466  | 0.003144  |
| 328 | -0.000106 | -0.000021 | -0.000029 | 0.000068  | 0.000162  | 0.000141  | 0.000791  | 0.000601  | -0.002051 | -0.001039 | -0.000067 | -0.000320 |
| 329 | -0.000283 | -0.000157 | -0.000024 | -0.000448 | -0.000705 | -0.000757 | -0.001114 | -0.000440 | -0.000612 | 0.000451  | -0.000177 | -0.000249 |
| 330 | -0.000141 | -0.000041 | 0.000119  | 0.000024  | 0.000769  | -0.000073 | -0.000192 | -0.000605 | -0.002058 | 0.000107  | -0.000089 | -0.000020 |
| 331 | 0.000094  | 0.000053  | 0.000002  | 0.000204  | 0.000212  | 0.000478  | 0.000557  | 0.000061  | 0.000947  | 0.000065  | 0.000088  | 0.000178  |
| 332 | 0.000197  | 0.000032  | -0.000006 | -0.000040 | -0.001689 | -0.000575 | -0.000530 | 0.000095  | 0.001231  | 0.000304  | 0.000226  | -0.000231 |
| 333 | 0.000243  | 0.000135  | -0.000062 | 0.000197  | 0.001237  | 0.000786  | 0.000479  | 0.000274  | 0.002583  | 0.000128  | 0.000027  | 0.000646  |

|    |           |           |           |           |           |           |           |           |           |           |           |           |
|----|-----------|-----------|-----------|-----------|-----------|-----------|-----------|-----------|-----------|-----------|-----------|-----------|
|    | 157       | 158       | 159       | 160       | 161       | 162       | 163       | 164       | 165       | 166       | 167       | 168       |
| 1  | -0.003449 | -0.000198 | 0.002991  | 0.002454  | 0.000226  | -0.001125 | 0.001932  | -0.013492 | 0.000880  | 0.014429  | -0.015283 | -0.000567 |
| 2  | -0.007255 | 0.000182  | -0.000538 | -0.000665 | -0.000088 | 0.000096  | -0.002156 | 0.001534  | 0.000595  | -0.005279 | 0.008504  | -0.000859 |
| 3  | -0.006161 | 0.000956  | -0.002377 | -0.002498 | -0.000905 | 0.008171  | -0.001819 | 0.012811  | 0.001741  | 0.020928  | 0.001782  | 0.005163  |
| 4  | 0.013863  | -0.000292 | 0.002045  | 0.002248  | 0.002259  | -0.005290 | 0.004511  | 0.006597  | -0.016888 | -0.006858 | -0.012703 | 0.012252  |
| 5  | 0.009001  | 0.001993  | 0.003293  | 0.002402  | -0.001501 | -0.029954 | -0.004250 | 0.009156  | 0.001307  | 0.007835  | -0.029110 | 0.002988  |
| 6  | 0.014519  | -0.002203 | -0.001994 | -0.001685 | 0.000347  | 0.026035  | 0.001454  | -0.002284 | 0.005338  | 0.015356  | -0.004122 | 0.000588  |
| 7  | 0.006302  | 0.003686  | -0.002851 | -0.001621 | -0.003866 | -0.000244 | -0.036535 | 0.017480  | 0.001434  | -0.014035 | 0.033896  | -0.000986 |
| 8  | -0.021330 | 0.002283  | -0.006814 | -0.007809 | -0.003540 | -0.001837 | -0.018610 | -0.003183 | -0.051326 | -0.042257 | 0.001932  | 0.003794  |
| 9  | 0.001782  | 0.000219  | -0.002164 | -0.002630 | -0.002402 | -0.003909 | -0.004473 | -0.019977 | 0.055764  | 0.101134  | 0.012371  | 0.001237  |
| 10 | 0.010715  | -0.000515 | 0.005677  | 0.005827  | 0.001557  | 0.003506  | 0.009897  | 0.028718  | -0.027261 | -0.063458 | -0.037016 | 0.010076  |
| 11 | 0.000724  | -0.000753 | 0.005804  | 0.005725  | 0.001385  | 0.002387  | 0.006632  | -0.004508 | -0.000442 | 0.007743  | 0.027466  | 0.019239  |
| 12 | -0.001042 | 0.003340  | 0.008045  | 0.004949  | -0.001284 | 0.002952  | -0.014065 | 0.003369  | 0.000969  | -0.003162 | -0.003852 | -0.000139 |
| 13 | 0.009027  | 0.002026  | 0.003457  | 0.002148  | -0.000801 | -0.000301 | -0.005495 | 0.001134  | 0.000660  | 0.010496  | -0.008425 | 0.002291  |
| 14 | -0.005243 | -0.001322 | -0.007123 | -0.004821 | 0.000847  | 0.000432  | 0.009641  | 0.007002  | -0.000692 | -0.010159 | 0.006372  | -0.001109 |
| 15 | 0.034382  | -0.000833 | -0.007391 | -0.005471 | -0.000247 | -0.001750 | 0.001625  | 0.006625  | 0.008656  | 0.009322  | -0.007458 | -0.001549 |
| 16 | -0.012669 | -0.000029 | 0.000244  | 0.000178  | -0.000609 | 0.002905  | 0.001956  | 0.017086  | -0.036429 | -0.073648 | 0.001440  | 0.001321  |
| 17 | -0.003430 | 0.003086  | -0.009036 | -0.009378 | -0.003959 | -0.002595 | -0.020119 | -0.027986 | -0.001870 | -0.000406 | 0.022464  | -0.003825 |
| 18 | 0.007515  | -0.000998 | 0.004245  | 0.004329  | 0.001437  | 0.002997  | 0.007580  | -0.017238 | 0.063165  | 0.072096  | -0.004401 | 0.000910  |
| 19 | 0.002974  | -0.000364 | -0.001071 | -0.001105 | -0.000207 | -0.002701 | -0.000407 | 0.011007  | -0.007516 | -0.022816 | -0.047458 | -0.023173 |
| 20 | 0.009304  | -0.000710 | 0.005672  | 0.005877  | 0.001652  | 0.002327  | 0.008291  | 0.023999  | 0.001044  | -0.023216 | 0.015209  | -0.001072 |
| 21 | 0.000371  | 0.000460  | -0.002385 | -0.002517 | -0.000740 | -0.002502 | -0.003622 | -0.003994 | 0.002352  | 0.009581  | 0.048121  | -0.013443 |
| 22 | -0.003334 | 0.000560  | -0.000188 | 0.000061  | 0.000079  | -0.002599 | 0.001729  | 0.005076  | 0.001337  | -0.010179 | 0.008607  | 0.001007  |
| 23 | 0.001383  | 0.002740  | 0.006537  | 0.004202  | -0.001694 | -0.000300 | -0.012476 | -0.001732 | -0.000906 | 0.007416  | -0.018051 | -0.002287 |
| 24 | 0.008291  | -0.001040 | -0.003169 | -0.002104 | 0.000613  | -0.003151 | 0.005149  | -0.003027 | -0.000559 | 0.009665  | -0.012015 | 0.001004  |
| 25 | -0.008942 | 0.000073  | 0.001478  | 0.001043  | 0.000329  | 0.003297  | -0.000561 | -0.005273 | -0.002265 | 0.000784  | 0.001104  | -0.000702 |
| 26 | -0.001663 | -0.001319 | -0.004588 | -0.002950 | 0.000185  | 0.000471  | 0.005539  | -0.011315 | 0.001003  | 0.015838  | -0.001640 | -0.000531 |

|    |           |           |           |           |           |           |           |           |           |           |           |           |
|----|-----------|-----------|-----------|-----------|-----------|-----------|-----------|-----------|-----------|-----------|-----------|-----------|
| 27 | 0.015662  | 0.000715  | 0.001573  | 0.000779  | -0.000086 | 0.002325  | -0.003432 | 0.005946  | 0.000118  | -0.001065 | 0.001073  | -0.001273 |
| 28 | 0.011200  | -0.001349 | 0.002741  | 0.002873  | 0.002004  | 0.001265  | 0.007873  | 0.010408  | 0.030466  | 0.063764  | 0.012593  | -0.015456 |
| 29 | 0.017915  | -0.002554 | 0.006043  | 0.006243  | 0.002255  | -0.001369 | 0.012225  | 0.048914  | -0.001975 | -0.050116 | -0.052043 | 0.005271  |
| 30 | 0.006822  | -0.000441 | 0.000588  | 0.000648  | 0.000273  | -0.004323 | 0.002780  | 0.012168  | 0.000975  | -0.014309 | 0.024168  | 0.011604  |
| 31 | 0.002968  | 0.001518  | 0.002265  | 0.001294  | -0.000446 | -0.005313 | -0.002777 | 0.012853  | 0.000542  | -0.016818 | 0.001003  | -0.012213 |
| 32 | 0.023288  | -0.001396 | -0.001848 | -0.001147 | 0.000468  | -0.003338 | 0.004951  | 0.003001  | 0.001077  | 0.013528  | -0.015326 | -0.005145 |
| 33 | 0.020890  | -0.001873 | -0.004008 | -0.002725 | 0.002205  | 0.003070  | 0.009835  | 0.005642  | 0.002724  | 0.003372  | -0.005577 | -0.004962 |
| 34 | 0.010131  | -0.000481 | -0.000480 | -0.000305 | 0.000212  | 0.005444  | 0.001245  | 0.003084  | 0.011403  | 0.008666  | 0.006003  | -0.004225 |
| 35 | -0.017881 | 0.001161  | -0.002679 | -0.003219 | -0.000729 | 0.004466  | -0.003399 | 0.027549  | -0.028416 | -0.024995 | 0.016517  | -0.003517 |
| 36 | 0.001093  | 0.000134  | -0.000397 | -0.000373 | -0.000153 | 0.000367  | -0.000649 | -0.003247 | 0.002285  | 0.002298  | -0.000405 | 0.000139  |
| 37 | 0.000464  | 0.000036  | -0.000205 | -0.000144 | 0.000037  | 0.000463  | -0.000071 | -0.000999 | -0.003005 | -0.000397 | 0.000495  | -0.000388 |
| 38 | 0.000121  | -0.000072 | 0.000249  | 0.000246  | 0.000113  | -0.000412 | 0.000439  | -0.000133 | 0.000389  | 0.000855  | 0.005020  | -0.002320 |
| 39 | -0.000122 | -0.000013 | 0.000387  | 0.000327  | 0.000049  | -0.000356 | 0.000216  | 0.000051  | -0.000274 | -0.000763 | -0.001454 | -0.003886 |
| 40 | -0.000238 | 0.000087  | 0.000319  | 0.000246  | -0.000027 | 0.000028  | -0.000129 | -0.000562 | -0.000168 | -0.000114 | 0.001144  | -0.000333 |
| 41 | -0.000424 | -0.000083 | 0.000200  | 0.000178  | 0.000010  | -0.000005 | 0.000223  | -0.000115 | -0.000009 | -0.000544 | 0.001097  | 0.000105  |
| 42 | -0.000185 | -0.000125 | 0.000034  | 0.000048  | 0.000060  | -0.000047 | 0.000346  | 0.000181  | 0.000050  | -0.000960 | 0.000255  | 0.000138  |
| 43 | 0.000048  | 0.000017  | -0.000175 | -0.000155 | -0.000019 | -0.000031 | -0.000157 | -0.000870 | 0.000188  | -0.001292 | 0.000553  | 0.000202  |
| 44 | 0.002204  | -0.001143 | 0.002972  | 0.002942  | 0.001093  | 0.000016  | 0.006284  | 0.005891  | 0.003651  | -0.006539 | -0.000244 | 0.006862  |
| 45 | 0.001069  | 0.000293  | 0.001276  | 0.000967  | -0.000350 | 0.000139  | -0.001578 | 0.001698  | 0.000171  | 0.001170  | -0.002492 | 0.006028  |
| 46 | 0.003056  | -0.000595 | -0.001971 | -0.001438 | 0.000574  | 0.000238  | 0.003335  | 0.001160  | -0.000135 | 0.002137  | -0.001891 | -0.000241 |
| 47 | -0.009876 | 0.000178  | -0.001258 | -0.001294 | -0.000007 | 0.000001  | -0.000969 | 0.001910  | -0.006395 | 0.000795  | -0.001804 | -0.000164 |
| 48 | 0.002833  | 0.003143  | -0.015016 | -0.005299 | -0.001329 | -0.000273 | -0.020794 | 0.003913  | 0.000650  | 0.000402  | 0.008979  | 0.000021  |
| 49 | 0.000889  | -0.007318 | 0.008991  | 0.005088  | -0.006617 | -0.000268 | 0.005424  | -0.001063 | -0.000122 | -0.000898 | -0.001485 | -0.000249 |
| 50 | -0.001189 | -0.007706 | 0.018832  | 0.010635  | 0.002060  | 0.000976  | 0.030998  | -0.005726 | -0.000936 | 0.001581  | -0.006881 | 0.000394  |
| 51 | 0.001085  | 0.002889  | 0.003059  | 0.002045  | 0.002585  | -0.000415 | 0.000773  | 0.001403  | 0.000024  | -0.000458 | -0.002592 | -0.000178 |
| 52 | 0.004008  | 0.012140  | -0.028016 | -0.017940 | 0.002044  | 0.000576  | -0.039475 | 0.004026  | 0.000811  | -0.000019 | 0.011233  | 0.000177  |
| 53 | -0.000420 | 0.000169  | -0.002975 | -0.002441 | 0.001091  | 0.000022  | 0.007070  | 0.000287  | -0.000043 | -0.000374 | -0.001900 | 0.000012  |
| 54 | 0.000102  | 0.000220  | -0.000075 | 0.000155  | 0.000004  | -0.000026 | -0.000582 | -0.000036 | 0.000008  | -0.000009 | 0.000371  | -0.000050 |
| 55 | 0.000451  | 0.000387  | 0.000266  | -0.000304 | -0.000857 | 0.000053  | -0.000594 | -0.000105 | 0.000071  | -0.000236 | -0.000099 | -0.000037 |
| 56 | 0.000804  | -0.001250 | 0.003864  | 0.003063  | -0.000102 | -0.000222 | 0.006706  | 0.000117  | 0.000114  | 0.000859  | -0.001269 | 0.000022  |
| 57 | 0.000040  | -0.000085 | -0.000194 | -0.000099 | -0.000106 | 0.000010  | -0.001096 | -0.000022 | 0.000031  | 0.000097  | -0.000038 | 0.000004  |
| 58 | -0.000028 | -0.000119 | -0.000785 | -0.001389 | 0.005548  | -0.000044 | 0.000618  | 0.000132  | 0.000033  | -0.000093 | 0.000142  | 0.000001  |
| 59 | 0.000118  | 0.000311  | 0.000226  | 0.001544  | -0.005576 | -0.000024 | -0.001588 | 0.000214  | -0.000037 | -0.000062 | 0.000101  | 0.000035  |
| 60 | 0.001035  | -0.000667 | -0.002850 | -0.002354 | -0.000962 | -0.001621 | 0.000293  | 0.001800  | -0.000631 | -0.001086 | 0.001907  | 0.000701  |
| 61 | 0.009649  | -0.014507 | -0.003223 | 0.000922  | 0.004003  | -0.024709 | 0.065449  | -0.011052 | 0.001898  | 0.015806  | -0.073243 | -0.000049 |
| 62 | -0.001952 | 0.010280  | 0.002264  | -0.002275 | -0.002605 | 0.026004  | -0.048052 | -0.058249 | -0.002014 | 0.050845  | -0.012733 | 0.002273  |
| 63 | -0.003499 | 0.010803  | 0.006799  | -0.000282 | -0.001438 | 0.019883  | -0.045398 | -0.021641 | -0.000924 | 0.011091  | -0.061006 | 0.000564  |
| 64 | 0.004040  | -0.011673 | -0.001898 | 0.003501  | 0.004096  | -0.021477 | 0.055493  | -0.060162 | 0.001607  | 0.062714  | -0.028167 | 0.000660  |
| 65 | 0.000840  | 0.000555  | -0.038865 | -0.026197 | 0.011940  | -0.025636 | 0.042909  | 0.031307  | 0.001567  | -0.015964 | 0.056072  | -0.001153 |
| 66 | -0.005063 | 0.006085  | 0.011899  | 0.006433  | -0.015763 | 0.024471  | -0.063244 | 0.056897  | -0.000831 | -0.053114 | 0.034319  | -0.001083 |
| 67 | -0.007057 | 0.003228  | 0.035403  | 0.025622  | -0.014597 | 0.030689  | -0.063454 | 0.000782  | -0.002883 | -0.010382 | 0.078851  | -0.000045 |
| 68 | 0.003218  | -0.004750 | -0.012575 | -0.007861 | 0.014395  | -0.029222 | 0.056442  | 0.061756  | 0.001517  | -0.060799 | 0.006021  | -0.001799 |
| 69 | 0.000971  | -0.000188 | 0.000180  | 0.000044  | -0.000393 | -0.000859 | -0.003981 | 0.013183  | 0.001915  | -0.004799 | 0.004383  | 0.006831  |
| 70 | -0.000599 | -0.000116 | -0.001283 | -0.000790 | 0.000076  | 0.000390  | 0.003400  | 0.007803  | 0.005610  | -0.014382 | -0.006944 | 0.008637  |
| 71 | 0.005038  | 0.000140  | 0.000273  | 0.000164  | 0.000287  | 0.000866  | -0.002400 | -0.000643 | 0.000754  | 0.002041  | 0.002678  | -0.007390 |
| 72 | -0.006147 | 0.000629  | 0.000468  | 0.000412  | -0.000338 | -0.000363 | 0.000483  | -0.006653 | -0.008335 | 0.004396  | 0.015882  | -0.008445 |
| 73 | -0.007659 | -0.000838 | -0.000225 | 0.000099  | 0.000693  | -0.001157 | 0.002530  | 0.014973  | -0.007955 | -0.029653 | -0.019674 | 0.007882  |
| 74 | -0.008050 | 0.000477  | -0.001565 | -0.001933 | -0.001154 | -0.003299 | -0.004474 | 0.004368  | -0.022661 | -0.006044 | 0.007936  | -0.003890 |
| 75 | -0.003730 | 0.000554  | -0.001761 | -0.002216 | -0.001080 | -0.003469 | -0.005637 | -0.013060 | 0.000539  | 0.035522  | 0.005149  | -0.003938 |
| 76 | 0.015004  | -0.001823 | 0.006418  | 0.006473  | 0.001788  | 0.007972  | 0.012943  | 0.005975  | 0.046774  | 0.034681  | -0.014172 | 0.013644  |



|     |           |           |           |           |           |           |           |           |           |           |           |           |
|-----|-----------|-----------|-----------|-----------|-----------|-----------|-----------|-----------|-----------|-----------|-----------|-----------|
| 77  | -0.002265 | -0.000394 | -0.001288 | -0.000764 | 0.000938  | -0.007637 | 0.004257  | -0.008856 | -0.023777 | -0.012101 | -0.022936 | -0.039243 |
| 78  | 0.002083  | -0.000219 | 0.002012  | 0.002082  | 0.000266  | 0.003148  | 0.002837  | 0.008284  | -0.000583 | -0.013652 | -0.029507 | 0.029918  |
| 79  | 0.001274  | -0.000264 | 0.001492  | 0.001677  | 0.000315  | 0.002905  | 0.003490  | 0.004633  | 0.002444  | -0.005711 | 0.006329  | 0.033505  |
| 80  | -0.005403 | 0.000799  | 0.000393  | -0.000666 | -0.000720 | 0.002143  | -0.007581 | -0.021628 | -0.004804 | 0.022842  | 0.036069  | -0.032458 |
| 81  | -0.000573 | -0.000401 | 0.002427  | 0.002062  | 0.000123  | 0.008352  | 0.000052  | 0.012390  | 0.003141  | -0.014979 | 0.023074  | 0.008921  |
| 82  | -0.001957 | 0.001041  | 0.001877  | 0.001078  | -0.000470 | -0.002170 | -0.004288 | 0.000089  | 0.000318  | -0.000629 | -0.004611 | -0.002803 |
| 83  | 0.000923  | 0.001033  | 0.002364  | 0.001356  | -0.000490 | -0.001360 | -0.005102 | -0.003156 | -0.000338 | 0.005599  | -0.010901 | -0.002848 |
| 84  | 0.004039  | -0.001038 | -0.005681 | -0.003982 | 0.001204  | 0.003168  | 0.008345  | -0.006286 | -0.000653 | 0.009332  | 0.011849  | 0.004692  |
| 85  | -0.000611 | -0.000805 | 0.000426  | 0.000684  | 0.000173  | -0.002828 | 0.002773  | 0.018510  | -0.001935 | -0.021622 | -0.004118 | 0.001867  |
| 86  | 0.002457  | -0.000181 | -0.002277 | -0.001507 | 0.000066  | 0.001826  | 0.002157  | -0.005334 | 0.001196  | 0.006509  | 0.000292  | -0.001078 |
| 87  | 0.009084  | -0.000265 | -0.001986 | -0.001252 | 0.000207  | 0.002432  | 0.003161  | -0.001534 | 0.002088  | 0.005616  | 0.000795  | -0.001274 |
| 88  | 0.010456  | 0.000771  | -0.002226 | -0.002613 | -0.000437 | -0.008437 | -0.006308 | 0.019493  | 0.003382  | -0.017197 | 0.001232  | 0.000837  |
| 89  | 0.004891  | -0.000257 | 0.000456  | 0.000427  | 0.000088  | 0.000007  | -0.000422 | -0.000818 | 0.001533  | 0.020053  | -0.021138 | -0.001829 |
| 90  | -0.003153 | 0.000136  | -0.000414 | -0.000140 | 0.000142  | -0.002458 | 0.000690  | -0.003445 | 0.001341  | -0.002025 | 0.010532  | 0.001115  |
| 91  | 0.006776  | -0.000052 | -0.000152 | -0.000119 | 0.000251  | 0.000200  | -0.000030 | -0.002087 | 0.001616  | 0.003015  | -0.003244 | -0.002341 |
| 92  | 0.001416  | 0.000031  | 0.000007  | 0.000084  | -0.000198 | 0.002553  | 0.000418  | 0.015372  | -0.003821 | -0.008930 | 0.002232  | -0.002163 |
| 93  | 0.002646  | -0.000309 | 0.000774  | 0.000969  | 0.000583  | 0.002051  | 0.002542  | 0.001127  | 0.009386  | 0.000015  | -0.004819 | 0.002022  |
| 94  | 0.005339  | -0.000169 | 0.000790  | 0.000963  | 0.000569  | 0.001246  | 0.001935  | -0.005325 | 0.013160  | 0.006238  | -0.003118 | 0.001870  |
| 95  | 0.001965  | -0.000218 | 0.000492  | 0.000724  | 0.000452  | 0.001274  | 0.002374  | 0.005166  | -0.000974 | -0.015981 | -0.001811 | 0.001614  |
| 96  | 0.001394  | -0.000330 | 0.001216  | 0.001434  | 0.000629  | 0.002165  | 0.003210  | 0.005369  | 0.001784  | -0.021570 | -0.003424 | 0.002197  |
| 97  | -0.001598 | 0.000105  | -0.001036 | -0.001087 | -0.000120 | -0.002002 | -0.001428 | -0.004931 | 0.000080  | 0.006469  | 0.011955  | -0.013881 |
| 98  | -0.000464 | 0.000121  | -0.000964 | -0.000980 | -0.000150 | -0.001138 | -0.001438 | -0.003335 | 0.000531  | 0.007211  | 0.018152  | -0.016434 |
| 99  | -0.000086 | 0.000069  | -0.000715 | -0.000788 | -0.000147 | -0.001100 | -0.001553 | -0.001162 | -0.001267 | 0.001874  | -0.004514 | -0.018824 |
| 100 | -0.001297 | 0.000190  | -0.000802 | -0.000920 | -0.000163 | -0.001823 | -0.001919 | -0.003683 | -0.001147 | 0.003841  | -0.000206 | -0.015558 |
| 101 | 0.000481  | -0.000536 | -0.000890 | -0.000460 | 0.000280  | 0.001200  | 0.002389  | -0.000365 | -0.000114 | 0.000096  | 0.002898  | 0.001568  |
| 102 | 0.001354  | -0.000506 | -0.001000 | -0.000620 | 0.000191  | 0.000989  | 0.001870  | 0.000043  | -0.000218 | 0.000746  | 0.001720  | 0.001190  |
| 103 | -0.000441 | -0.000445 | -0.000960 | -0.000526 | 0.000216  | 0.000603  | 0.002292  | 0.001920  | 0.000169  | -0.002674 | 0.004658  | 0.001395  |
| 104 | -0.000453 | -0.000589 | -0.001411 | -0.000836 | 0.000276  | 0.000760  | 0.002825  | 0.001199  | 0.000168  | -0.002871 | 0.006181  | 0.001468  |
| 105 | -0.001889 | 0.000092  | 0.001154  | 0.000751  | -0.000027 | -0.001021 | -0.001143 | 0.002784  | -0.000683 | -0.003675 | -0.000038 | 0.000526  |
| 106 | -0.000702 | 0.000094  | 0.001098  | 0.000739  | -0.000041 | -0.000793 | -0.001051 | 0.002541  | -0.000501 | -0.002922 | -0.000046 | 0.000554  |
| 107 | -0.004192 | 0.000108  | 0.001146  | 0.000806  | -0.000048 | -0.001129 | -0.001295 | 0.000163  | -0.000861 | -0.002420 | -0.000483 | 0.000669  |
| 108 | -0.004382 | 0.000151  | 0.000871  | 0.000465  | -0.000158 | -0.001328 | -0.001853 | -0.001387 | -0.001148 | -0.003167 | -0.000677 | 0.000608  |
| 109 | -0.005505 | -0.000119 | -0.000191 | -0.000074 | -0.000052 | 0.000354  | 0.001235  | -0.000078 | 0.008326  | -0.005597 | 0.025141  | -0.007855 |
| 110 | 0.000911  | 0.000365  | -0.000193 | -0.000282 | -0.000010 | -0.000361 | -0.000796 | 0.000521  | -0.010116 | -0.013801 | -0.004732 | 0.009938  |
| 111 | -0.000005 | -0.000388 | -0.000589 | -0.000488 | -0.000111 | 0.001102  | 0.000396  | -0.000330 | -0.000125 | 0.002714  | 0.002374  | 0.008639  |
| 112 | 0.003250  | 0.000239  | 0.000929  | 0.000554  | -0.000027 | 0.001403  | -0.001159 | 0.003389  | -0.001121 | -0.000307 | -0.012142 | -0.009326 |
| 113 | -0.001543 | -0.000071 | -0.000238 | -0.000099 | -0.000364 | -0.000225 | -0.000296 | 0.003228  | -0.000458 | -0.003100 | 0.000906  | 0.001141  |
| 114 | -0.005011 | 0.000120  | 0.000353  | 0.000189  | 0.000123  | 0.000015  | 0.000337  | -0.000939 | -0.001128 | -0.000079 | 0.002407  | 0.001181  |
| 115 | 0.019336  | -0.000036 | -0.000782 | -0.000704 | -0.000098 | -0.001488 | -0.001241 | -0.017528 | 0.012586  | 0.014236  | -0.001345 | 0.001167  |
| 116 | -0.030004 | 0.000022  | 0.000809  | 0.000654  | 0.000309  | -0.001096 | 0.000719  | 0.003116  | -0.009167 | -0.006046 | -0.001031 | 0.000934  |
| 117 | 0.000562  | -0.017246 | 0.047091  | 0.037905  | -0.006485 | 0.000843  | 0.034570  | -0.010526 | -0.001117 | 0.002668  | -0.003922 | -0.000167 |
| 118 | -0.001167 | -0.011629 | 0.020959  | 0.013573  | -0.000628 | 0.000113  | 0.032472  | -0.005322 | -0.000872 | 0.001309  | -0.007264 | 0.000221  |
| 119 | -0.002111 | -0.009837 | 0.024055  | 0.014980  | -0.002043 | 0.000357  | 0.026238  | -0.005679 | -0.000976 | 0.001240  | -0.008677 | 0.000211  |
| 120 | 0.000247  | -0.001466 | 0.001892  | 0.001360  | 0.000545  | 0.000068  | 0.002127  | -0.001268 | -0.000240 | 0.000590  | -0.000710 | 0.000151  |
| 121 | -0.000056 | 0.001122  | -0.001474 | -0.000588 | -0.000372 | -0.000008 | -0.000835 | 0.000714  | 0.000129  | -0.000469 | 0.000327  | -0.000087 |
| 122 | -0.000187 | 0.001145  | -0.002660 | -0.001687 | 0.000177  | -0.000058 | -0.001273 | 0.000549  | 0.000112  | -0.000126 | 0.000379  | -0.000063 |
| 123 | 0.000423  | -0.000895 | 0.002376  | 0.003258  | 0.000636  | 0.000218  | -0.000353 | -0.000694 | -0.000078 | 0.001205  | -0.000150 | 0.000205  |
| 124 | 0.000071  | -0.000174 | -0.000691 | 0.000069  | -0.001352 | -0.000142 | -0.001282 | 0.000467  | 0.000070  | -0.000659 | 0.000587  | -0.000087 |
| 125 | -0.000502 | 0.000564  | 0.000237  | 0.000477  | -0.000803 | -0.000078 | 0.001634  | 0.000233  | 0.000006  | -0.000533 | -0.000426 | -0.000120 |
| 126 | -0.002448 | -0.006152 | 0.021208  | 0.013771  | 0.002753  | 0.000528  | 0.029476  | -0.005114 | -0.001167 | 0.002140  | -0.009295 | 0.000374  |

|     |           |            |           |           |           |           |           |           |           |           |           |           |
|-----|-----------|------------|-----------|-----------|-----------|-----------|-----------|-----------|-----------|-----------|-----------|-----------|
| 127 | -0.000019 | -0.0003940 | 0.014783  | 0.008495  | 0.002577  | 0.000421  | 0.015898  | -0.003771 | -0.000443 | 0.001097  | -0.006796 | 0.000268  |
| 128 | -0.000171 | -0.000281  | 0.001178  | -0.000304 | 0.000401  | 0.000011  | 0.000179  | -0.000221 | 0.000014  | 0.000072  | -0.000218 | -0.000010 |
| 129 | 0.000209  | 0.004073   | 0.006691  | -0.009931 | 0.020016  | -0.000019 | 0.002590  | 0.000243  | 0.000026  | -0.000261 | -0.000025 | 0.000004  |
| 130 | 0.000029  | -0.003894  | -0.007588 | 0.009758  | -0.020475 | -0.000056 | -0.002140 | 0.000096  | -0.000013 | 0.000005  | 0.000153  | -0.000013 |
| 131 | 0.000085  | 0.001895   | -0.002641 | -0.007968 | 0.000415  | 0.000012  | -0.001744 | -0.000147 | 0.000133  | 0.000054  | -0.000067 | -0.000010 |
| 132 | -0.000029 | -0.001879  | 0.002387  | 0.008232  | -0.000397 | 0.000047  | 0.000395  | 0.000156  | -0.000125 | 0.000097  | 0.000216  | 0.000042  |
| 133 | -0.000124 | 0.000094   | -0.000004 | 0.000177  | 0.000093  | 0.000007  | 0.000685  | -0.000131 | -0.000035 | 0.000039  | -0.000058 | -0.000011 |
| 134 | -0.018926 | -0.000147  | -0.002007 | -0.002605 | -0.000142 | -0.001924 | 0.000086  | 0.074645  | 0.000911  | -0.070764 | -0.008544 | 0.003843  |
| 135 | 0.064534  | -0.002096  | 0.003854  | 0.002646  | 0.000332  | 0.000041  | 0.010658  | -0.066545 | 0.122803  | 0.023767  | 0.005207  | 0.004304  |
| 136 | -0.027686 | -0.000081  | -0.000080 | -0.000420 | -0.000306 | -0.000986 | 0.001271  | 0.072210  | -0.048653 | 0.088755  | -0.000576 | 0.000669  |
| 137 | -0.013322 | 0.000238   | -0.001895 | -0.002050 | 0.000048  | -0.001059 | -0.001854 | -0.090676 | 0.048491  | -0.073303 | -0.003139 | -0.004530 |
| 138 | 0.029602  | -0.000703  | 0.001797  | 0.001136  | 0.001848  | -0.000544 | 0.002186  | -0.023476 | -0.122275 | 0.069562  | -0.017468 | 0.006308  |
| 139 | 0.008461  | 0.000128   | 0.006942  | 0.006787  | -0.000270 | 0.001345  | 0.001036  | 0.011472  | -0.004812 | 0.006200  | 0.072612  | -0.002456 |
| 140 | 0.006429  | 0.000952   | 0.001043  | 0.001055  | -0.000104 | 0.000346  | -0.005635 | -0.014244 | -0.008456 | 0.015383  | -0.072997 | 0.121698  |
| 141 | 0.002404  | 0.000680   | 0.001434  | 0.001731  | -0.000366 | 0.000948  | -0.003396 | 0.002064  | 0.003310  | 0.003344  | 0.070819  | -0.046870 |
| 142 | 0.005719  | 0.000281   | 0.001290  | 0.001632  | -0.000272 | 0.000923  | -0.000904 | 0.011178  | -0.001523 | -0.000258 | -0.084319 | 0.046231  |
| 143 | -0.002275 | -0.000367  | 0.001902  | 0.001991  | 0.000113  | -0.000563 | 0.003623  | 0.004793  | -0.004776 | -0.012780 | -0.022400 | -0.121579 |
| 144 | 0.014018  | 0.000220   | 0.003871  | 0.002467  | 0.000303  | -0.005342 | 0.005707  | 0.027793  | -0.000797 | -0.026079 | 0.011298  | -0.002414 |
| 145 | -0.001782 | -0.000244  | -0.001242 | -0.001720 | 0.001016  | -0.002658 | 0.008225  | -0.003101 | -0.002370 | 0.004519  | -0.018896 | -0.007286 |
| 146 | 0.003323  | 0.000036   | 0.000359  | 0.000066  | -0.000027 | -0.000541 | 0.000733  | 0.006409  | 0.000373  | -0.005883 | -0.000231 | 0.001203  |
| 147 | -0.004526 | 0.000122   | 0.001168  | 0.000936  | -0.000229 | -0.000438 | -0.002274 | 0.005755  | 0.000101  | -0.008511 | 0.009541  | -0.002355 |
| 148 | 0.012129  | -0.001032  | 0.000489  | -0.000329 | 0.000233  | -0.000653 | 0.001336  | 0.012374  | 0.002085  | -0.009801 | -0.003323 | -0.001662 |
| 149 | -0.015677 | 0.000199   | -0.007246 | -0.005502 | 0.000932  | 0.004898  | 0.002941  | -0.003247 | 0.003977  | -0.012339 | 0.015080  | -0.000127 |
| 150 | 0.031200  | 0.000141   | -0.002438 | -0.002133 | -0.000118 | -0.000132 | -0.002790 | 0.011967  | 0.004159  | -0.004190 | -0.004453 | -0.001420 |
| 151 | -0.013248 | 0.000430   | -0.002442 | -0.001678 | -0.000169 | 0.001164  | -0.003620 | -0.000833 | 0.001234  | -0.008718 | 0.020564  | 0.000190  |
| 152 | -0.027850 | 0.000379   | -0.001769 | -0.001035 | -0.000066 | 0.001348  | -0.000685 | -0.000897 | -0.004297 | -0.001569 | 0.019946  | -0.000170 |
| 153 | 0.056233  | -0.000217  | -0.000999 | -0.000432 | 0.000407  | 0.002317  | 0.003693  | -0.012209 | 0.006850  | 0.015309  | -0.005440 | 0.002148  |
| 154 | 0.014747  | -0.000555  | 0.003620  | 0.003537  | 0.001283  | -0.000036 | 0.000862  | -0.018690 | -0.012860 | 0.032430  | -0.036042 | 0.012665  |
| 155 | -0.002719 | 0.000378   | 0.002124  | 0.002085  | -0.000130 | -0.001369 | 0.002109  | 0.010970  | -0.002675 | -0.010933 | -0.021621 | -0.012183 |
| 156 | 0.013724  | -0.000219  | -0.002301 | -0.001786 | 0.000576  | -0.000671 | 0.000707  | 0.012559  | 0.001902  | -0.010167 | 0.004312  | -0.001195 |
| 157 | 0.348569  | -0.000581  | -0.001111 | -0.001118 | -0.000471 | 0.001084  | 0.003454  | -0.031765 | 0.013317  | 0.024534  | 0.004816  | 0.002019  |
| 158 | -0.000581 | 0.420622   | -0.224243 | -0.067354 | 0.134128  | 0.000387  | -0.009718 | -0.000584 | -0.000189 | -0.000191 | 0.001263  | 0.000074  |
| 159 | -0.001111 | -0.224243  | 0.708124  | 0.256406  | -0.098121 | -0.000513 | -0.005310 | 0.001415  | -0.000317 | 0.001506  | 0.001088  | -0.000261 |
| 160 | -0.001118 | -0.067354  | 0.256406  | 0.577372  | -0.202638 | -0.000171 | -0.000228 | 0.000712  | -0.000313 | 0.001786  | 0.001592  | -0.000241 |
| 161 | -0.000471 | 0.134128   | -0.098121 | -0.202638 | 0.398340  | 0.000286  | 0.002660  | -0.000144 | -0.000163 | -0.000592 | -0.000956 | -0.000048 |
| 162 | 0.001084  | 0.000387   | -0.000513 | -0.000171 | 0.000286  | 0.027485  | 0.004061  | -0.001779 | 0.000145  | 0.002178  | 0.002138  | 0.000206  |
| 163 | 0.003454  | -0.009718  | -0.005310 | -0.000228 | 0.002660  | 0.004061  | 0.013303  | 0.004528  | 0.000798  | 0.001303  | -0.007316 | -0.000793 |
| 164 | -0.031765 | -0.000584  | 0.001415  | 0.000712  | -0.000144 | -0.001779 | 0.004528  | 0.282574  | -0.131077 | 0.051074  | 0.003006  | -0.000894 |
| 165 | 0.013317  | -0.000189  | -0.000317 | -0.000313 | -0.000163 | 0.000145  | 0.000798  | -0.131077 | 0.275905  | -0.129810 | 0.004978  | -0.002514 |
| 166 | 0.024534  | -0.000191  | 0.001506  | 0.001786  | -0.000592 | 0.002178  | 0.001303  | 0.051074  | -0.129810 | 0.287782  | 0.003713  | 0.006643  |
| 167 | 0.004816  | 0.001263   | 0.001088  | 0.001592  | -0.000956 | 0.002138  | -0.007316 | 0.003006  | 0.004978  | 0.003713  | 0.281853  | -0.130135 |
| 168 | 0.002019  | 0.000074   | -0.000261 | -0.000241 | -0.000048 | 0.000206  | -0.000793 | -0.000894 | -0.002514 | 0.006643  | -0.130135 | 0.274392  |
| 169 | -0.004468 | -0.000402  | -0.000906 | -0.001516 | 0.000867  | -0.001673 | 0.002086  | -0.016647 | 0.000275  | 0.003683  | 0.043666  | -0.131444 |
| 170 | -0.006871 | -0.000188  | -0.000144 | 0.000455  | 0.000248  | 0.002090  | -0.001876 | -0.040446 | 0.000662  | 0.037919  | -0.006751 | -0.006288 |
| 171 | -0.012240 | 0.000178   | -0.000551 | -0.000113 | -0.000009 | 0.000892  | -0.001461 | -0.017520 | -0.000834 | 0.013866  | -0.000745 | -0.004089 |
| 172 | -0.002256 | 0.000099   | -0.001878 | -0.001206 | 0.000344  | 0.001157  | 0.001456  | -0.023666 | -0.000638 | 0.025060  | -0.014779 | 0.000150  |
| 173 | -0.021902 | 0.001217   | -0.003185 | -0.002222 | -0.000264 | 0.001120  | -0.006669 | 0.003833  | -0.000386 | -0.013944 | 0.030808  | -0.000180 |
| 174 | -0.012789 | 0.000023   | 0.000171  | 0.000097  | -0.000048 | -0.000394 | -0.000173 | 0.006002  | -0.002978 | -0.001703 | -0.000010 | -0.000743 |
| 175 | 0.034983  | -0.000926  | 0.001795  | 0.000761  | -0.000086 | -0.002441 | 0.001257  | 0.000521  | 0.006011  | 0.001520  | -0.030078 | -0.000226 |
| 176 | 0.028384  | 0.000851   | -0.005021 | -0.004733 | -0.001073 | 0.001344  | -0.008627 | -0.002461 | -0.033022 | 0.079509  | -0.001790 | -0.010007 |

|     |           |           |           |           |           |           |           |           |           |           |           |           |
|-----|-----------|-----------|-----------|-----------|-----------|-----------|-----------|-----------|-----------|-----------|-----------|-----------|
| 177 | 0.011625  | -0.000838 | 0.001998  | 0.002065  | 0.000677  | 0.000999  | 0.005928  | 0.008648  | -0.010883 | -0.005926 | 0.078407  | -0.027583 |
| 178 | -0.006457 | -0.000763 | -0.001455 | -0.001092 | 0.000747  | -0.000818 | 0.005786  | 0.007053  | -0.004726 | -0.011316 | -0.001278 | -0.032237 |
| 179 | 0.006304  | 0.000138  | 0.004550  | 0.003821  | -0.000600 | 0.001572  | -0.004353 | -0.001298 | -0.001979 | 0.002417  | -0.000196 | -0.012587 |
| 180 | -0.008419 | 0.001638  | 0.002749  | 0.002238  | -0.000620 | -0.002953 | -0.008296 | 0.001580  | -0.002168 | -0.000183 | 0.010149  | -0.002801 |
| 181 | -0.030146 | -0.000789 | 0.000686  | 0.000571  | 0.000408  | -0.002628 | 0.006618  | -0.007341 | -0.006803 | 0.004782  | 0.009268  | -0.001577 |
| 182 | -0.001748 | -0.000397 | 0.001656  | 0.001861  | -0.000309 | 0.001412  | 0.006103  | -0.000423 | -0.010828 | 0.001156  | -0.008788 | -0.002504 |
| 183 | 0.003756  | 0.000303  | -0.004910 | -0.004596 | 0.000682  | -0.000774 | -0.002514 | 0.078643  | -0.030906 | -0.003123 | -0.011989 | -0.006009 |
| 184 | -0.000429 | -0.012366 | 0.014557  | 0.117993  | -0.008189 | 0.000088  | 0.002698  | 0.001136  | -0.000343 | 0.001959  | 0.000903  | -0.000140 |
| 185 | -0.001484 | -0.331701 | 0.637993  | 0.342365  | -0.241019 | -0.000766 | -0.006949 | 0.001766  | -0.000328 | 0.001804  | 0.001649  | -0.000188 |
| 186 | 0.000412  | 0.127672  | -0.137580 | 0.080364  | -0.086320 | 0.000172  | 0.002940  | -0.000739 | 0.000191  | 0.000410  | 0.000730  | -0.000007 |
| 187 | 0.000914  | 0.255149  | -0.450931 | -0.570460 | 0.350035  | 0.000517  | -0.007581 | -0.000754 | 0.000035  | -0.002724 | -0.001891 | 0.000315  |
| 188 | 0.000580  | -0.002768 | -0.114649 | 0.004214  | 0.008190  | 0.000054  | 0.009067  | -0.001609 | 0.000421  | -0.001498 | -0.001494 | 0.000039  |
| 189 | 0.000201  | -0.002770 | 0.002705  | 0.020432  | 0.002122  | 0.000000  | 0.000570  | 0.000119  | -0.000059 | -0.000114 | -0.000058 | 0.000016  |
| 190 | 0.000885  | -0.000553 | 0.000770  | 0.000801  | 0.000361  | 0.000111  | 0.002852  | 0.000563  | -0.002203 | 0.005194  | -0.001460 | 0.000619  |
| 191 | 0.002607  | 0.000024  | 0.000623  | 0.000535  | 0.000009  | -0.000025 | -0.000002 | 0.004642  | -0.000935 | -0.000427 | 0.000011  | 0.000958  |
| 192 | -0.000291 | 0.000371  | -0.001258 | -0.001212 | -0.000407 | -0.000023 | -0.002154 | -0.002123 | -0.000317 | 0.000199  | 0.000461  | -0.001284 |
| 193 | -0.000482 | 0.000097  | -0.000565 | -0.000547 | -0.000150 | 0.000047  | -0.000602 | 0.000802  | -0.000398 | 0.001922  | 0.002139  | -0.001180 |
| 194 | 0.000027  | 0.000019  | -0.000252 | -0.000244 | -0.000094 | 0.000081  | -0.000166 | -0.001354 | 0.000540  | -0.001343 | 0.000552  | 0.000070  |
| 195 | -0.002904 | 0.000215  | -0.001295 | -0.001180 | -0.000198 | -0.000027 | -0.000974 | -0.003165 | 0.000766  | 0.001093  | 0.007815  | -0.001424 |
| 196 | 0.000212  | 0.000079  | -0.000449 | -0.000378 | 0.000047  | 0.000020  | -0.000377 | 0.000272  | -0.000259 | 0.000057  | -0.001260 | 0.000651  |
| 197 | 0.000040  | -0.000013 | 0.000244  | 0.000222  | 0.000038  | 0.000010  | 0.000154  | 0.000064  | -0.000030 | 0.000114  | -0.000601 | 0.000134  |
| 198 | -0.000007 | 0.000046  | -0.000176 | -0.000178 | -0.000081 | 0.000009  | -0.000316 | -0.000043 | -0.000032 | 0.000220  | 0.000319  | -0.000107 |
| 199 | -0.000134 | 0.000042  | -0.000210 | -0.000195 | -0.000064 | 0.000003  | -0.000265 | -0.000206 | 0.000201  | -0.000442 | 0.000375  | -0.000004 |
| 200 | -0.000128 | 0.000071  | -0.000535 | -0.000491 | -0.000094 | 0.000024  | -0.000482 | -0.000499 | 0.001256  | -0.001652 | 0.000805  | -0.000550 |
| 201 | -0.000924 | -0.000038 | -0.000289 | -0.000167 | -0.000001 | 0.000076  | 0.000006  | -0.000787 | 0.000129  | 0.001389  | 0.000010  | 0.001702  |
| 202 | 0.000247  | -0.000007 | 0.000237  | 0.000217  | 0.000086  | -0.000042 | 0.000304  | 0.000312  | 0.000044  | 0.000072  | -0.001077 | 0.000378  |
| 203 | -0.000236 | -0.000079 | -0.000475 | -0.000416 | 0.000075  | 0.000058  | 0.000444  | -0.000134 | 0.000038  | -0.000074 | 0.000767  | -0.000881 |
| 204 | 0.000084  | -0.000202 | -0.000619 | -0.000431 | 0.000103  | -0.000045 | 0.000573  | 0.000399  | -0.000089 | -0.000113 | -0.001633 | -0.000814 |
| 205 | 0.000379  | -0.000097 | 0.001173  | 0.001081  | 0.000125  | -0.000055 | 0.000538  | -0.000305 | 0.000014  | -0.001016 | 0.003315  | -0.000477 |
| 206 | 0.000412  | -0.000120 | 0.000734  | 0.000517  | -0.000140 | -0.000047 | -0.000445 | 0.000159  | 0.000011  | -0.000087 | 0.000674  | -0.001093 |
| 207 | 0.000141  | -0.000064 | -0.000219 | -0.000182 | -0.000024 | -0.000043 | -0.000003 | 0.000229  | -0.000023 | -0.000106 | -0.000260 | 0.001283  |
| 208 | 0.000012  | -0.000032 | -0.000166 | -0.000131 | 0.000005  | -0.000002 | 0.000072  | -0.000009 | 0.000005  | 0.000032  | -0.000109 | 0.000122  |
| 209 | 0.000009  | -0.000067 | -0.000097 | -0.000065 | 0.000023  | 0.000009  | 0.000141  | -0.000021 | -0.000004 | -0.000003 | 0.000039  | -0.000114 |
| 210 | -0.000026 | 0.000035  | 0.000285  | 0.000249  | 0.000043  | 0.000008  | 0.000086  | -0.000050 | -0.000010 | 0.000008  | 0.000002  | -0.000010 |
| 211 | 0.000032  | -0.000068 | -0.000228 | -0.000274 | 0.000221  | -0.000008 | 0.001124  | -0.000067 | 0.000006  | -0.000022 | -0.000021 | -0.000434 |
| 212 | -0.001187 | 0.000015  | 0.000265  | 0.000187  | -0.000071 | 0.000218  | -0.000021 | -0.000674 | -0.000264 | 0.000290  | 0.000070  | 0.000042  |
| 213 | -0.001079 | 0.000047  | 0.000172  | 0.000135  | -0.000020 | -0.000188 | -0.000292 | -0.001331 | 0.000082  | -0.000071 | 0.000186  | -0.000004 |
| 214 | -0.000242 | 0.000081  | 0.000175  | 0.000126  | -0.000054 | -0.000136 | -0.000475 | -0.000067 | 0.000007  | 0.000176  | -0.000010 | 0.000071  |
| 215 | 0.000718  | 0.000179  | 0.000477  | 0.000324  | -0.000195 | -0.000161 | -0.000917 | 0.000640  | 0.000001  | -0.000383 | -0.000068 | 0.000010  |
| 216 | 0.000042  | -0.000019 | 0.000008  | -0.000030 | -0.000070 | 0.000053  | -0.000049 | 0.000261  | -0.000182 | 0.000336  | -0.000237 | 0.000006  |
| 217 | 0.000032  | -0.000205 | -0.001001 | -0.000734 | 0.000258  | -0.000026 | 0.001307  | 0.000548  | 0.000030  | -0.000778 | 0.000302  | -0.000076 |
| 218 | 0.000119  | 0.000010  | 0.000144  | 0.000105  | -0.000020 | -0.000247 | -0.000052 | 0.000099  | 0.000006  | 0.000035  | 0.000075  | -0.000017 |
| 219 | 0.000047  | 0.000033  | 0.000031  | 0.000011  | -0.000031 | 0.000003  | -0.000139 | -0.000024 | -0.000007 | 0.000026  | -0.000023 | 0.000018  |
| 220 | -0.000086 | 0.000050  | 0.000106  | 0.000074  | -0.000026 | -0.000016 | -0.000168 | -0.000059 | 0.000002  | 0.000000  | 0.000011  | 0.000007  |
| 221 | 0.000123  | -0.000007 | -0.000062 | -0.000062 | -0.000012 | -0.000009 | -0.000027 | 0.000021  | -0.000005 | 0.000072  | -0.000070 | 0.000014  |
| 222 | 0.000021  | -0.000111 | 0.000176  | 0.000162  | -0.000057 | -0.000039 | -0.000223 | 0.000028  | -0.000036 | 0.000228  | -0.000180 | 0.000043  |
| 223 | -0.002226 | 0.000315  | -0.000774 | -0.000756 | 0.000120  | 0.000052  | -0.001013 | -0.005971 | 0.001496  | -0.001020 | 0.000614  | 0.000077  |
| 224 | -0.009340 | 0.000018  | -0.000864 | -0.000796 | -0.000192 | -0.000024 | -0.000641 | -0.000278 | -0.000221 | -0.000676 | -0.000390 | 0.000001  |
| 225 | 0.010603  | -0.000013 | 0.000485  | 0.000529  | 0.000103  | 0.000037  | 0.000393  | -0.001189 | 0.001155  | 0.001073  | 0.000336  | 0.000044  |
| 226 | -0.010610 | 0.000075  | 0.000328  | 0.000319  | -0.000066 | -0.000079 | -0.000107 | -0.000690 | 0.000832  | -0.001132 | 0.000094  | 0.000046  |

|     |           |           |           |           |           |           |           |           |           |           |           |           |
|-----|-----------|-----------|-----------|-----------|-----------|-----------|-----------|-----------|-----------|-----------|-----------|-----------|
| 227 | 0.003661  | -0.000019 | 0.000124  | 0.000112  | -0.000053 | 0.000026  | -0.000035 | 0.000060  | -0.000541 | 0.001824  | -0.000816 | 0.000060  |
| 228 | 0.006162  | -0.000034 | 0.000070  | 0.000100  | 0.000065  | 0.000024  | 0.000216  | 0.000287  | -0.000015 | -0.001920 | 0.000948  | -0.000084 |
| 229 | -0.001874 | 0.000163  | -0.000389 | -0.000417 | -0.000215 | 0.000003  | -0.000720 | -0.000440 | 0.000493  | -0.000100 | 0.000114  | -0.000007 |
| 230 | -0.000061 | 0.000003  | -0.000451 | -0.000405 | -0.000085 | 0.000000  | -0.000248 | -0.000320 | 0.000029  | -0.000178 | 0.000017  | 0.000018  |
| 231 | 0.000390  | -0.000002 | 0.000140  | 0.000155  | 0.000037  | -0.000004 | 0.000086  | -0.000283 | 0.000122  | -0.000063 | 0.000062  | 0.000009  |
| 232 | 0.000520  | -0.000012 | 0.000152  | 0.000147  | 0.000032  | 0.000007  | 0.000136  | 0.000421  | -0.000138 | 0.000050  | -0.000040 | 0.000007  |
| 233 | 0.001709  | 0.000048  | 0.000282  | 0.000294  | 0.000092  | 0.000010  | 0.000103  | 0.001224  | -0.000645 | 0.000500  | 0.000418  | 0.000055  |
| 234 | -0.004218 | 0.000191  | -0.001096 | -0.001089 | -0.000303 | -0.000037 | -0.000832 | -0.004717 | 0.000229  | 0.000796  | 0.004764  | 0.002192  |
| 235 | 0.004625  | -0.001444 | 0.005769  | 0.005627  | 0.001846  | 0.000008  | 0.008697  | 0.007519  | 0.000670  | -0.002808 | -0.007404 | 0.003171  |
| 236 | 0.000712  | 0.000012  | -0.000837 | -0.000764 | -0.000215 | -0.000022 | -0.000543 | -0.000139 | -0.000555 | 0.000389  | 0.001152  | -0.001232 |
| 237 | 0.000912  | 0.000835  | -0.002338 | -0.002339 | -0.000941 | -0.000067 | -0.004914 | -0.000104 | -0.000685 | -0.000365 | 0.000587  | -0.001793 |
| 238 | -0.000132 | -0.000174 | 0.000815  | 0.000792  | 0.000287  | 0.000041  | 0.001186  | 0.000579  | -0.000270 | 0.001719  | -0.000822 | 0.000126  |
| 239 | -0.000140 | -0.000093 | 0.000203  | 0.000215  | 0.000123  | 0.000031  | 0.000488  | 0.000232  | -0.000386 | 0.001750  | -0.000530 | 0.000110  |
| 240 | 0.000282  | -0.000027 | 0.000363  | 0.000320  | 0.000036  | -0.000003 | 0.000209  | 0.000586  | 0.000325  | -0.001599 | -0.001441 | 0.000803  |
| 241 | 0.000426  | -0.000091 | 0.000595  | 0.000544  | 0.000129  | 0.000007  | 0.000618  | 0.000814  | 0.000139  | -0.001595 | -0.001704 | 0.000937  |
| 242 | 0.000059  | 0.000154  | -0.000472 | -0.000452 | -0.000167 | -0.000060 | -0.000906 | -0.000329 | 0.000456  | -0.000971 | 0.001205  | -0.000643 |
| 243 | 0.000121  | 0.000142  | -0.000388 | -0.000376 | -0.000142 | -0.000069 | -0.000825 | -0.000371 | 0.000393  | -0.001274 | 0.001215  | -0.000474 |
| 244 | -0.001503 | 0.000214  | -0.001122 | -0.001065 | -0.000278 | 0.000127  | -0.001364 | -0.002044 | -0.000166 | 0.001786  | 0.001024  | -0.001669 |
| 245 | -0.001141 | 0.000276  | -0.001483 | -0.001407 | -0.000372 | 0.000045  | -0.001796 | -0.002010 | -0.000142 | 0.002188  | 0.001995  | -0.001556 |
| 246 | 0.001610  | 0.000719  | 0.004546  | 0.003646  | -0.000570 | -0.000271 | -0.002877 | 0.001094  | -0.000299 | -0.001371 | 0.003662  | 0.002114  |
| 247 | -0.001214 | 0.000077  | -0.000449 | -0.000382 | 0.000345  | 0.000254  | 0.001258  | -0.001728 | 0.000547  | 0.002094  | -0.001059 | 0.001987  |
| 248 | -0.000457 | -0.000147 | -0.001398 | -0.001170 | 0.000042  | 0.000080  | 0.000303  | -0.000121 | 0.000022  | 0.000519  | -0.001011 | -0.000477 |
| 249 | -0.000475 | -0.000066 | -0.001127 | -0.000976 | 0.000046  | 0.000031  | 0.000253  | 0.000119  | -0.000016 | 0.000409  | -0.001562 | -0.001359 |
| 250 | 0.000074  | -0.000058 | -0.000254 | -0.000172 | 0.000015  | -0.000023 | 0.000126  | 0.000181  | -0.000054 | -0.000132 | -0.000387 | 0.000104  |
| 251 | 0.000066  | -0.000079 | -0.000358 | -0.000265 | -0.000002 | -0.000007 | 0.000088  | 0.000134  | -0.000049 | -0.000197 | -0.000184 | 0.000147  |
| 252 | 0.000204  | 0.000057  | 0.000572  | 0.000486  | 0.000013  | -0.000022 | -0.000021 | -0.000050 | 0.000038  | -0.000212 | 0.000397  | 0.000370  |
| 253 | 0.000190  | 0.000010  | 0.000455  | 0.000413  | 0.000027  | -0.000021 | 0.000037  | -0.000037 | 0.000032  | -0.000182 | 0.000332  | 0.000505  |
| 254 | -0.000160 | 0.000120  | -0.000173 | -0.000224 | -0.000007 | 0.000039  | -0.000052 | 0.000027  | 0.000011  | 0.000160  | -0.000251 | -0.000514 |
| 255 | -0.000152 | 0.000248  | 0.000393  | 0.000246  | 0.000016  | 0.000037  | -0.000115 | 0.000010  | -0.000004 | 0.000217  | 0.000124  | -0.000360 |
| 256 | 0.000181  | -0.000512 | -0.001326 | -0.000875 | 0.000213  | -0.000053 | 0.001199  | 0.000138  | -0.000106 | -0.000764 | 0.000193  | -0.001353 |
| 257 | 0.000143  | -0.000368 | -0.000883 | -0.000729 | -0.000136 | -0.000046 | -0.000197 | 0.000245  | -0.000124 | -0.000551 | -0.000287 | -0.001204 |
| 258 | 0.001171  | -0.001125 | -0.002874 | -0.002140 | 0.000829  | -0.000057 | 0.005768  | 0.001804  | -0.000185 | -0.001053 | 0.000002  | -0.000352 |
| 259 | -0.002448 | 0.000294  | 0.000702  | 0.000560  | -0.000146 | 0.000821  | -0.001559 | -0.003424 | -0.000019 | 0.001749  | -0.000416 | 0.000219  |
| 260 | -0.000753 | 0.000241  | 0.000613  | 0.000481  | -0.000156 | 0.000026  | -0.001229 | -0.000536 | 0.000108  | -0.000124 | 0.000288  | 0.000028  |
| 261 | -0.000721 | 0.000130  | 0.000515  | 0.000397  | -0.000100 | -0.000541 | -0.000872 | -0.000575 | 0.000107  | -0.000079 | 0.000381  | 0.000067  |
| 262 | 0.000950  | 0.000058  | 0.000099  | 0.000056  | -0.000062 | 0.000041  | -0.000205 | 0.000734  | -0.000029 | -0.000081 | -0.000200 | 0.000022  |
| 263 | 0.000844  | 0.000057  | 0.000138  | 0.000083  | -0.000062 | -0.000009 | -0.000198 | 0.000697  | -0.000023 | -0.000088 | -0.000108 | 0.000009  |
| 264 | -0.000540 | -0.000043 | -0.000059 | -0.000044 | 0.000039  | 0.000036  | 0.000228  | -0.000556 | -0.000009 | 0.000204  | -0.000014 | -0.000026 |
| 265 | -0.000657 | 0.000006  | 0.000044  | 0.000032  | 0.000001  | 0.000071  | 0.000003  | -0.000591 | -0.000017 | 0.000194  | -0.000020 | -0.000028 |
| 266 | 0.000075  | -0.000072 | -0.000155 | -0.000093 | 0.000056  | -0.000054 | 0.000169  | -0.000089 | 0.000072  | 0.000040  | -0.000033 | 0.000023  |
| 267 | 0.000282  | -0.000136 | -0.000318 | -0.000225 | 0.000090  | -0.000050 | 0.000393  | -0.000015 | 0.000064  | 0.000059  | -0.000098 | 0.000030  |
| 268 | 0.001231  | 0.000560  | 0.001334  | 0.000916  | -0.000522 | -0.000120 | -0.002776 | 0.001406  | -0.000043 | -0.000290 | 0.000130  | 0.000033  |
| 269 | 0.000574  | 0.000024  | -0.000052 | -0.000034 | 0.000037  | -0.000169 | 0.000301  | 0.001148  | -0.000026 | -0.000529 | 0.000082  | -0.000025 |
| 270 | 0.002660  | -0.000128 | 0.000326  | 0.000282  | -0.000364 | -0.000100 | 0.000059  | 0.003460  | -0.002251 | 0.000139  | -0.001681 | -0.000146 |
| 271 | -0.009039 | 0.000068  | -0.003689 | -0.003671 | -0.000165 | 0.000171  | -0.002339 | -0.001554 | -0.002350 | -0.000377 | -0.000569 | 0.000027  |
| 272 | 0.011478  | 0.000148  | 0.000944  | 0.000945  | 0.000483  | 0.000026  | 0.000628  | -0.000821 | 0.001546  | -0.000473 | 0.001482  | -0.000026 |
| 273 | 0.010452  | -0.000049 | 0.001098  | 0.001197  | 0.000208  | 0.000010  | 0.001101  | -0.000564 | 0.001432  | -0.000223 | 0.001295  | 0.000007  |
| 274 | -0.009500 | 0.000021  | -0.000869 | -0.000860 | -0.000280 | -0.000013 | -0.000701 | -0.001309 | 0.000361  | -0.000834 | -0.000164 | 0.000064  |
| 275 | -0.008426 | 0.000047  | 0.000030  | -0.000009 | -0.000113 | -0.000032 | -0.000250 | -0.001389 | 0.000425  | -0.000044 | -0.000288 | 0.000045  |
| 276 | -0.003765 | -0.000077 | -0.000002 | -0.000013 | -0.000028 | -0.000019 | 0.000017  | 0.001630  | -0.001013 | 0.001437  | -0.001093 | -0.000019 |

|     |           |           |           |           |           |           |           |           |           |           |           |           |
|-----|-----------|-----------|-----------|-----------|-----------|-----------|-----------|-----------|-----------|-----------|-----------|-----------|
| 277 | -0.003240 | -0.000056 | -0.000155 | -0.000173 | -0.000063 | -0.000017 | -0.000111 | 0.001471  | -0.000852 | 0.001191  | -0.000988 | -0.000021 |
| 278 | 0.010079  | -0.000018 | 0.000213  | 0.000239  | 0.000101  | 0.000020  | 0.000337  | 0.000632  | -0.000028 | -0.000746 | 0.000826  | -0.000027 |
| 279 | 0.012642  | -0.000016 | 0.000069  | 0.000094  | 0.000067  | 0.000043  | 0.000252  | 0.000709  | -0.000005 | -0.000691 | 0.000904  | -0.000021 |
| 280 | -0.006248 | 0.000038  | 0.000737  | 0.000720  | 0.000034  | -0.000043 | 0.000321  | -0.000547 | 0.001580  | -0.000147 | 0.000070  | 0.000072  |
| 281 | -0.006963 | 0.000021  | 0.001290  | 0.001243  | 0.000118  | -0.000045 | 0.000683  | -0.001765 | 0.001196  | 0.000784  | 0.000215  | 0.000049  |
| 282 | 0.000461  | 0.000284  | -0.000464 | -0.000495 | -0.000163 | 0.000071  | -0.001217 | -0.002696 | -0.004235 | -0.001315 | -0.007023 | 0.003832  |
| 283 | 0.000395  | -0.000130 | 0.000491  | 0.000442  | 0.000127  | 0.000061  | 0.000775  | 0.000140  | -0.000416 | -0.000044 | -0.000459 | -0.000571 |
| 284 | -0.000040 | 0.000011  | -0.000006 | -0.000013 | -0.000020 | -0.000026 | -0.000097 | -0.000107 | 0.000682  | -0.001694 | -0.000500 | 0.000214  |
| 285 | 0.000194  | -0.000065 | 0.000085  | 0.000073  | 0.000043  | -0.000015 | 0.000341  | 0.000468  | 0.000694  | -0.000613 | 0.001687  | -0.000877 |
| 286 | 0.000014  | -0.000080 | 0.000035  | 0.000034  | 0.000069  | -0.000003 | 0.000386  | 0.000135  | -0.000180 | 0.001188  | 0.002108  | -0.000687 |
| 287 | 0.000326  | -0.000328 | 0.000843  | 0.000783  | 0.000233  | -0.000034 | 0.001732  | 0.000905  | -0.000330 | -0.001166 | 0.001743  | -0.001425 |
| 288 | -0.001125 | -0.000162 | 0.000275  | 0.000369  | 0.000002  | 0.000047  | 0.000579  | -0.001388 | 0.000112  | 0.000939  | 0.004521  | 0.003875  |
| 289 | -0.000059 | -0.000142 | 0.000490  | 0.000525  | 0.000233  | 0.000036  | 0.001290  | -0.000101 | -0.000037 | 0.000054  | 0.000246  | -0.000409 |
| 290 | 0.000078  | 0.000048  | -0.000165 | -0.000202 | -0.000110 | 0.000000  | -0.000511 | -0.000023 | 0.000010  | 0.000096  | -0.000430 | 0.000194  |
| 291 | 0.000084  | 0.000042  | -0.000231 | -0.000230 | -0.000085 | -0.000035 | -0.000372 | 0.000238  | -0.000030 | -0.000069 | -0.000697 | -0.000919 |
| 292 | 0.000087  | 0.000013  | -0.000159 | -0.000160 | -0.000027 | -0.000077 | -0.000120 | 0.000177  | -0.000037 | -0.000281 | 0.000023  | -0.000725 |
| 293 | 0.000183  | 0.000015  | -0.000020 | -0.000045 | 0.000040  | -0.000127 | 0.000059  | 0.000189  | -0.000061 | -0.000132 | -0.000818 | -0.001189 |
| 294 | -0.000207 | 0.000266  | 0.000669  | 0.000551  | -0.000306 | -0.000254 | -0.001509 | -0.000058 | 0.000291  | -0.000636 | 0.000658  | 0.000042  |
| 295 | -0.000237 | 0.000376  | 0.001030  | 0.000787  | -0.000250 | -0.000001 | -0.001519 | -0.000194 | 0.000021  | 0.000111  | 0.000401  | -0.000020 |
| 296 | 0.000247  | -0.000136 | -0.000415 | -0.000332 | 0.000073  | 0.000001  | 0.000477  | 0.000220  | 0.000009  | -0.000107 | -0.000199 | 0.000014  |
| 297 | 0.000051  | -0.000086 | -0.000369 | -0.000295 | 0.000054  | 0.000128  | 0.000370  | 0.000101  | -0.000024 | 0.000056  | -0.000242 | -0.000001 |
| 298 | -0.000186 | -0.000041 | -0.000088 | -0.000083 | 0.000003  | 0.000183  | 0.000075  | -0.000142 | -0.000051 | 0.000034  | 0.000056  | -0.000011 |
| 299 | -0.000098 | 0.000095  | 0.000027  | -0.000002 | -0.000019 | 0.000519  | -0.000229 | 0.000240  | -0.000076 | -0.000133 | -0.000167 | -0.000035 |
| 300 | -0.018974 | 0.000083  | -0.000095 | -0.000254 | 0.000080  | -0.000075 | 0.000036  | 0.005053  | -0.004755 | -0.004826 | -0.000874 | -0.000091 |
| 301 | -0.003727 | -0.000003 | 0.000365  | 0.000335  | 0.000083  | -0.000163 | 0.000116  | 0.001223  | -0.001533 | -0.000076 | -0.000259 | -0.000100 |
| 302 | 0.000841  | -0.000015 | 0.000022  | 0.000032  | 0.000006  | 0.000080  | 0.000097  | -0.001733 | 0.000762  | -0.000206 | 0.000175  | 0.000039  |
| 303 | 0.000936  | -0.000045 | 0.000189  | 0.000211  | 0.000071  | 0.000040  | 0.000204  | -0.001508 | 0.000914  | 0.000741  | 0.000150  | -0.000003 |
| 304 | -0.000124 | -0.000075 | 0.000280  | 0.000313  | 0.000109  | -0.000003 | 0.000344  | 0.000788  | -0.000194 | 0.000652  | -0.000292 | -0.000006 |
| 305 | 0.001793  | -0.000165 | 0.000851  | 0.000983  | 0.000284  | 0.000028  | 0.000815  | -0.000587 | -0.000719 | 0.000472  | 0.000207  | -0.000033 |
| 306 | 0.005327  | -0.001081 | 0.003364  | 0.003060  | 0.000876  | -0.000018 | 0.005816  | 0.003849  | -0.011270 | 0.006624  | 0.015913  | -0.016121 |
| 307 | 0.000767  | -0.000347 | 0.000825  | 0.000727  | 0.000319  | 0.000016  | 0.002006  | 0.000472  | -0.000421 | -0.001219 | 0.002370  | -0.001538 |
| 308 | -0.000171 | 0.000262  | -0.000593 | -0.000553 | -0.000216 | 0.000006  | -0.001390 | -0.001060 | -0.000306 | -0.001056 | -0.003269 | 0.001689  |
| 309 | -0.000154 | 0.000095  | -0.000181 | -0.000169 | -0.000067 | 0.000012  | -0.000510 | -0.000419 | -0.000524 | 0.000824  | -0.000995 | 0.000767  |
| 310 | 0.000054  | -0.000034 | -0.000003 | -0.000001 | 0.000024  | -0.000016 | 0.000180  | 0.000571  | 0.000548  | 0.000232  | 0.001584  | -0.000614 |
| 311 | -0.000083 | -0.000064 | 0.000159  | 0.000151  | 0.000040  | -0.000029 | 0.000308  | -0.000002 | 0.001196  | -0.002065 | -0.000189 | -0.000322 |
| 312 | -0.000403 | 0.000092  | -0.000212 | -0.000158 | -0.000102 | 0.000010  | -0.000613 | 0.000426  | -0.000509 | 0.003238  | 0.000405  | 0.000058  |
| 313 | 0.000167  | -0.000412 | 0.001202  | 0.001299  | 0.000648  | -0.000317 | 0.003406  | 0.000968  | -0.000838 | -0.004294 | 0.003053  | -0.015502 |
| 314 | -0.000281 | 0.000007  | -0.000105 | -0.000071 | -0.000122 | -0.000072 | -0.000350 | 0.000165  | -0.000087 | -0.000190 | 0.000133  | -0.001520 |
| 315 | -0.000157 | -0.000031 | 0.000140  | 0.000131  | 0.000022  | 0.000060  | 0.000175  | -0.000464 | 0.000066  | 0.000498  | 0.000625  | 0.001619  |
| 316 | -0.000043 | -0.000016 | -0.000013 | 0.000000  | 0.000015  | 0.000025  | 0.000081  | -0.000138 | 0.000030  | -0.000030 | 0.000843  | 0.000751  |
| 317 | 0.000002  | 0.000035  | -0.000200 | -0.000195 | -0.000082 | -0.000013 | -0.000356 | 0.000223  | -0.000011 | -0.000081 | -0.000579 | -0.000625 |
| 318 | 0.000162  | 0.000084  | 0.000007  | -0.000048 | -0.000092 | 0.000015  | -0.000630 | 0.000126  | -0.000020 | -0.000008 | -0.001098 | -0.000422 |
| 319 | 0.000307  | -0.000080 | 0.000158  | 0.000171  | 0.000260  | -0.000012 | 0.001082  | 0.000076  | 0.000025  | -0.000174 | 0.000070  | 0.000215  |
| 320 | 0.000447  | 0.000914  | 0.001863  | 0.001327  | -0.000640 | 0.001086  | -0.003962 | -0.000539 | -0.000423 | 0.003368  | 0.000403  | -0.000576 |
| 321 | -0.000526 | -0.000095 | -0.000403 | -0.000310 | -0.000029 | 0.000400  | 0.000058  | -0.000029 | 0.000027  | -0.000094 | -0.000083 | 0.000033  |
| 322 | 0.000385  | 0.000063  | 0.000158  | 0.000126  | -0.000032 | -0.000295 | -0.000217 | 0.000273  | 0.000079  | -0.000151 | 0.000021  | 0.000001  |
| 323 | -0.000038 | 0.000014  | 0.000167  | 0.000135  | -0.000025 | -0.000127 | -0.000110 | -0.000261 | 0.000023  | -0.000016 | 0.000215  | 0.000004  |
| 324 | -0.000052 | -0.000084 | -0.000318 | -0.000248 | 0.000049  | 0.000066  | 0.000333  | 0.000016  | -0.000025 | 0.000105  | -0.000162 | 0.000008  |
| 325 | 0.000241  | -0.000253 | -0.000664 | -0.000505 | 0.000181  | 0.000012  | 0.001029  | 0.000401  | -0.000008 | -0.000097 | -0.000415 | 0.000021  |
| 326 | -0.000012 | 0.000351  | 0.001050  | 0.000793  | -0.000141 | -0.000058 | -0.001075 | -0.000407 | -0.000097 | 0.000259  | 0.000417  | -0.000067 |

|     |           |           |           |           |           |           |           |           |           |           |           |           |
|-----|-----------|-----------|-----------|-----------|-----------|-----------|-----------|-----------|-----------|-----------|-----------|-----------|
| 327 | -0.010196 | -0.000167 | 0.001835  | 0.002045  | 0.000617  | -0.000343 | 0.000898  | 0.014563  | -0.016814 | 0.001889  | -0.003032 | -0.001002 |
| 328 | -0.007229 | -0.000095 | 0.000700  | 0.000759  | 0.000319  | -0.000031 | 0.000558  | 0.000224  | -0.000314 | 0.000497  | -0.000580 | -0.000068 |
| 329 | -0.001317 | 0.000063  | -0.000226 | -0.000323 | -0.000101 | 0.000020  | -0.000159 | -0.000512 | -0.000391 | -0.001501 | 0.000254  | 0.000005  |
| 330 | -0.001730 | 0.000039  | -0.000313 | -0.000331 | -0.000093 | -0.000016 | -0.000215 | 0.001562  | -0.000589 | -0.000552 | -0.000260 | 0.000024  |
| 331 | 0.002238  | 0.000002  | -0.000072 | -0.000052 | -0.000009 | 0.000035  | -0.000102 | -0.000889 | 0.000836  | 0.000776  | 0.000155  | -0.000003 |
| 332 | 0.001994  | -0.000014 | 0.000143  | 0.000164  | 0.000034  | 0.000071  | 0.000113  | -0.002692 | 0.001749  | 0.000316  | 0.000261  | 0.000056  |
| 333 | 0.006161  | 0.000006  | -0.000241 | -0.000225 | -0.000151 | -0.000076 | -0.000201 | 0.002250  | -0.001258 | 0.000470  | 0.000183  | -0.000013 |

|    | 169       | 170       | 171       | 172       | 173       | 174       | 175       | 176       | 177       | 178       | 179       | 180       |
|----|-----------|-----------|-----------|-----------|-----------|-----------|-----------|-----------|-----------|-----------|-----------|-----------|
| 1  | 0.016953  | 0.036288  | 0.003381  | 0.017871  | -0.018959 | 0.000463  | 0.018052  | -0.007922 | 0.006384  | -0.004187 | 0.011633  | -0.011039 |
| 2  | -0.005654 | -0.009369 | 0.001502  | -0.005065 | 0.007014  | 0.001090  | -0.002210 | 0.004563  | -0.001953 | -0.000145 | -0.002250 | 0.012024  |
| 3  | -0.008774 | -0.018199 | -0.005449 | 0.002707  | -0.019482 | 0.005764  | 0.007524  | -0.011484 | 0.057733  | 0.017956  | -0.011921 | 0.001100  |
| 4  | -0.023415 | -0.026434 | 0.011692  | 0.026017  | -0.005413 | -0.002347 | -0.012969 | 0.009360  | -0.024471 | -0.026177 | -0.011372 | -0.010377 |
| 5  | 0.012971  | -0.031624 | -0.008969 | 0.006755  | -0.005290 | 0.010340  | 0.008246  | -0.007670 | 0.021226  | 0.051389  | -0.004346 | 0.032003  |
| 6  | -0.008460 | 0.015342  | 0.001405  | 0.007174  | -0.011001 | -0.015436 | -0.021547 | -0.029598 | -0.008793 | -0.001676 | -0.019851 | -0.053952 |
| 7  | -0.036773 | -0.038506 | -0.002535 | -0.015555 | 0.034577  | 0.000142  | -0.032850 | 0.005282  | 0.003211  | 0.000552  | -0.020090 | 0.016011  |
| 8  | -0.006116 | -0.012031 | -0.003625 | -0.000460 | -0.033539 | 0.015252  | 0.043403  | 0.069311  | 0.028951  | 0.007020  | -0.006484 | -0.004843 |
| 9  | -0.002442 | -0.007389 | -0.001071 | -0.005795 | 0.013356  | -0.002182 | -0.007921 | -0.099467 | 0.038315  | 0.012468  | 0.006443  | 0.006606  |
| 10 | 0.013258  | -0.000588 | -0.000587 | 0.007487  | -0.013616 | -0.000264 | 0.000792  | 0.032102  | -0.047057 | 0.002449  | -0.014020 | -0.008205 |
| 11 | -0.034227 | -0.021159 | 0.022458  | 0.020160  | 0.001765  | -0.000295 | -0.005541 | -0.013057 | -0.005176 | -0.037736 | 0.015879  | 0.007858  |
| 12 | 0.013947  | 0.028265  | -0.048385 | -0.036442 | -0.012370 | -0.001004 | 0.010932  | 0.006291  | 0.005501  | 0.027977  | -0.044457 | -0.010226 |
| 13 | -0.004267 | 0.001787  | -0.000048 | 0.041445  | 0.056933  | 0.020515  | -0.033351 | -0.008892 | 0.012492  | 0.021048  | 0.028759  | 0.047954  |
| 14 | -0.004323 | 0.006614  | -0.011486 | -0.016655 | -0.077809 | -0.030570 | 0.027168  | 0.001230  | -0.007927 | -0.013214 | -0.013233 | -0.054957 |
| 15 | 0.008341  | 0.016725  | 0.005473  | 0.007283  | 0.051004  | -0.005363 | -0.056837 | -0.029805 | -0.018860 | -0.004953 | 0.004903  | -0.006082 |
| 16 | -0.004763 | -0.010332 | -0.002135 | -0.003217 | -0.015030 | 0.005946  | 0.020000  | 0.092915  | 0.023179  | 0.005378  | -0.002102 | 0.001579  |
| 17 | -0.023709 | 0.002059  | -0.000757 | 0.007692  | -0.007885 | 0.000935  | 0.007302  | 0.039046  | 0.008092  | -0.002469 | -0.013029 | -0.013630 |
| 18 | 0.005484  | 0.004854  | -0.000446 | -0.001156 | 0.005180  | -0.001321 | -0.002944 | -0.104841 | -0.000216 | 0.005520  | 0.005635  | -0.002436 |
| 19 | 0.025265  | 0.004675  | -0.002044 | 0.005640  | -0.007363 | 0.000573  | 0.004358  | 0.000170  | -0.026566 | 0.022168  | -0.009027 | -0.007110 |
| 20 | 0.045253  | 0.027110  | 0.004211  | 0.015139  | -0.006573 | 0.001856  | -0.003492 | 0.001494  | -0.014094 | -0.037255 | -0.013244 | -0.004346 |
| 21 | -0.034850 | -0.000340 | 0.006577  | 0.001401  | 0.008636  | -0.000032 | -0.006776 | 0.001428  | 0.018041  | -0.020513 | 0.011217  | 0.006332  |
| 22 | 0.005575  | 0.011241  | -0.014431 | -0.057770 | -0.013911 | -0.001345 | 0.012712  | 0.008555  | -0.007622 | -0.014294 | -0.056703 | -0.030361 |
| 23 | 0.006830  | -0.050357 | 0.039109  | -0.004520 | 0.018085  | -0.000856 | -0.011513 | -0.007976 | 0.009096  | 0.031457  | 0.028689  | 0.010337  |
| 24 | 0.002773  | 0.014093  | 0.032061  | 0.049831  | 0.023343  | 0.006652  | -0.020581 | -0.005490 | 0.011879  | 0.029695  | 0.057490  | 0.025465  |
| 25 | -0.001971 | -0.003209 | -0.007756 | -0.002853 | -0.066493 | -0.018988 | 0.041119  | 0.005459  | 0.003068  | -0.003158 | -0.008549 | -0.024267 |
| 26 | -0.004629 | -0.020662 | -0.004190 | -0.010814 | -0.017067 | 0.005664  | 0.015374  | 0.004007  | 0.013805  | 0.010741  | -0.001230 | 0.011489  |
| 27 | 0.001687  | 0.011503  | 0.001833  | 0.002688  | 0.076041  | -0.000827 | -0.042482 | -0.011413 | -0.010143 | -0.002222 | 0.005714  | 0.003549  |
| 28 | -0.030085 | 0.000634  | 0.002125  | 0.006343  | 0.004042  | -0.000598 | -0.006145 | -0.079752 | 0.032081  | 0.017868  | -0.001109 | -0.005809 |
| 29 | -0.011106 | 0.008996  | 0.000039  | 0.012283  | -0.016654 | 0.002082  | 0.001628  | -0.002186 | -0.043972 | 0.026711  | 0.001685  | -0.009649 |
| 30 | -0.039296 | 0.030629  | 0.011598  | 0.005128  | 0.004223  | 0.002368  | -0.008799 | 0.005422  | 0.000008  | -0.047041 | 0.019019  | 0.005628  |
| 31 | 0.010047  | 0.025954  | -0.039062 | -0.027177 | 0.000067  | 0.001661  | 0.000720  | 0.004138  | -0.010628 | 0.014463  | -0.025398 | -0.012325 |
| 32 | 0.001001  | -0.017428 | -0.019770 | 0.048447  | 0.049305  | 0.003249  | -0.066408 | -0.015839 | 0.008520  | 0.016690  | -0.011456 | 0.037884  |
| 33 | -0.001805 | -0.037848 | -0.016535 | -0.015324 | -0.050307 | -0.015979 | -0.018416 | 0.001151  | 0.007209  | 0.004702  | -0.020754 | -0.034483 |
| 34 | -0.002449 | 0.002459  | 0.000059  | -0.005122 | 0.031720  | -0.005412 | -0.044307 | -0.002328 | -0.003170 | 0.000269  | 0.006407  | 0.001155  |
| 35 | -0.018127 | -0.003940 | -0.005816 | -0.001983 | -0.021127 | 0.003144  | 0.028548  | 0.029904  | 0.017540  | 0.000743  | -0.009875 | -0.016038 |
| 36 | 0.001141  | 0.001047  | 0.000218  | 0.000367  | 0.000234  | -0.000111 | -0.000624 | -0.000115 | -0.000195 | -0.000179 | 0.000206  | 0.000030  |
| 37 | 0.001063  | 0.000766  | 0.000274  | 0.000014  | 0.000595  | 0.000008  | -0.000516 | 0.015425  | -0.004262 | -0.002032 | -0.000027 | 0.000494  |
| 38 | -0.000897 | -0.000899 | -0.000133 | -0.000700 | 0.000562  | -0.000002 | -0.000101 | -0.002544 | 0.006027  | -0.000905 | -0.000548 | -0.000058 |
| 39 | 0.005478  | 0.000717  | -0.000426 | -0.000339 | -0.000244 | 0.000040  | 0.000577  | -0.001354 | -0.002929 | 0.006514  | -0.000707 | 0.000103  |
| 40 | -0.000282 | -0.000741 | 0.001783  | -0.000044 | 0.000366  | 0.000157  | 0.000218  | -0.000269 | -0.001203 | -0.003568 | 0.008495  | 0.000678  |

|    |           |           |           |           |           |           |           |           |           |           |           |           |
|----|-----------|-----------|-----------|-----------|-----------|-----------|-----------|-----------|-----------|-----------|-----------|-----------|
| 41 | 0.000103  | 0.000488  | 0.000885  | -0.005440 | -0.000996 | -0.000348 | 0.000773  | 0.000532  | -0.000919 | -0.000768 | 0.000925  | -0.004906 |
| 42 | 0.000528  | 0.000901  | 0.001232  | 0.000433  | 0.002816  | 0.001981  | 0.000086  | 0.000474  | -0.000662 | -0.000063 | 0.001130  | 0.004276  |
| 43 | 0.000357  | 0.001109  | 0.000321  | 0.000509  | -0.000754 | 0.002350  | -0.001060 | 0.002712  | 0.000277  | -0.000632 | 0.000088  | 0.000222  |
| 44 | -0.004015 | -0.001067 | -0.000542 | 0.001309  | -0.002949 | 0.000143  | 0.000218  | -0.010605 | -0.008824 | 0.005886  | -0.000679 | -0.001936 |
| 45 | 0.001092  | 0.003972  | 0.005141  | 0.002860  | -0.000962 | 0.000097  | -0.001907 | -0.000706 | 0.004772  | -0.005092 | -0.009250 | 0.000726  |
| 46 | -0.000837 | -0.004571 | -0.008041 | -0.001831 | 0.003817  | -0.003454 | -0.006383 | -0.003074 | 0.001991  | 0.001736  | -0.003745 | 0.003928  |
| 47 | -0.001054 | -0.003024 | -0.001259 | -0.000232 | -0.003320 | -0.003817 | 0.005446  | -0.005444 | 0.000957  | 0.002960  | -0.002697 | -0.003126 |
| 48 | -0.012266 | -0.001144 | 0.000804  | 0.001828  | 0.009988  | -0.000087 | -0.010019 | -0.001065 | 0.004323  | 0.003623  | -0.008072 | 0.004125  |
| 49 | 0.003038  | -0.001306 | -0.000691 | -0.001413 | -0.001604 | -0.000090 | 0.001604  | 0.001018  | -0.001499 | -0.003118 | 0.002715  | -0.000257 |
| 50 | 0.009649  | 0.005688  | -0.000352 | 0.000538  | -0.006546 | -0.000185 | 0.007052  | 0.002521  | -0.003518 | -0.002861 | 0.005063  | -0.000817 |
| 51 | 0.002098  | -0.002585 | -0.000801 | -0.001623 | -0.002624 | -0.000050 | 0.001860  | -0.002947 | 0.000478  | -0.000210 | -0.000378 | -0.001009 |
| 52 | -0.014184 | -0.000467 | 0.001902  | 0.003767  | 0.011010  | 0.000069  | -0.011081 | 0.002826  | 0.004404  | 0.005304  | -0.005281 | 0.001476  |
| 53 | 0.002008  | 0.001654  | 0.000269  | 0.000315  | -0.002012 | -0.000120 | 0.002397  | -0.000370 | -0.000115 | -0.000294 | -0.000395 | 0.001997  |
| 54 | -0.000216 | -0.000326 | -0.000019 | -0.000191 | 0.000328  | 0.000017  | -0.000334 | 0.000131  | -0.000261 | -0.000410 | 0.000054  | -0.000029 |
| 55 | 0.000458  | 0.000231  | 0.000009  | -0.000223 | -0.000185 | -0.000005 | 0.000429  | 0.000054  | -0.000268 | -0.000685 | 0.000837  | -0.000028 |
| 56 | 0.001907  | 0.001090  | -0.000204 | 0.000239  | -0.002188 | -0.000041 | 0.001365  | 0.003885  | 0.000083  | -0.001002 | 0.000979  | -0.001053 |
| 57 | 0.000085  | -0.000082 | -0.000019 | -0.000040 | 0.000050  | -0.000003 | -0.000005 | 0.000021  | -0.000025 | -0.000022 | -0.000088 | -0.000023 |
| 58 | -0.000181 | -0.000219 | 0.000072  | -0.000109 | -0.000011 | -0.000041 | 0.000102  | -0.000138 | 0.000112  | 0.000156  | -0.000025 | 0.000289  |
| 59 | -0.000318 | -0.000171 | 0.000094  | 0.000151  | 0.000225  | -0.000039 | -0.000275 | -0.000135 | 0.000528  | 0.000346  | -0.000311 | 0.000053  |
| 60 | -0.003156 | -0.006297 | -0.000010 | -0.001337 | 0.003427  | -0.000706 | -0.004437 | 0.001962  | -0.001473 | 0.001629  | -0.001433 | -0.000419 |
| 61 | 0.068675  | 0.027256  | -0.007891 | 0.020687  | -0.071074 | -0.001265 | 0.064475  | -0.012267 | -0.009381 | 0.024429  | 0.017609  | -0.028535 |
| 62 | 0.023636  | 0.080070  | 0.035988  | 0.043157  | -0.013482 | -0.001190 | 0.015627  | 0.025662  | -0.015728 | 0.000184  | 0.014519  | -0.003296 |
| 63 | 0.074888  | 0.042628  | -0.000928 | 0.017889  | -0.067397 | 0.000302  | 0.069530  | -0.004504 | -0.029267 | 0.009814  | 0.030095  | -0.008891 |
| 64 | 0.028207  | 0.100869  | 0.033962  | 0.060144  | -0.031622 | -0.002001 | 0.027260  | 0.008975  | 0.012847  | -0.005014 | 0.006518  | -0.017021 |
| 65 | -0.070464 | -0.034872 | 0.003749  | -0.016623 | 0.059445  | 0.000281  | -0.061147 | -0.009882 | 0.029017  | -0.001857 | -0.039192 | 0.013721  |
| 66 | -0.035641 | -0.085083 | -0.030894 | -0.052396 | 0.026240  | 0.002251  | -0.020799 | -0.016140 | 0.005697  | -0.006995 | 0.000180  | 0.021012  |
| 67 | -0.073644 | -0.036571 | 0.005151  | -0.022468 | 0.078897  | 0.000657  | -0.073038 | 0.026895  | 0.010097  | -0.031918 | -0.008492 | 0.024374  |
| 68 | -0.015798 | -0.097069 | -0.039147 | -0.050807 | 0.019125  | 0.000844  | -0.022492 | -0.018118 | -0.002447 | 0.012224  | -0.021766 | -0.000679 |
| 69 | -0.008443 | 0.018503  | -0.001307 | -0.000760 | 0.005424  | 0.001208  | -0.002836 | -0.012977 | -0.006461 | -0.007504 | 0.001329  | -0.004969 |
| 70 | 0.007740  | 0.004527  | -0.002526 | 0.004848  | 0.009449  | -0.000322 | -0.003886 | 0.007510  | -0.001537 | -0.006325 | -0.004213 | -0.005151 |
| 71 | -0.005554 | -0.041613 | -0.000543 | -0.007252 | 0.006245  | -0.001840 | -0.014094 | 0.005383  | 0.010095  | 0.011581  | -0.008898 | 0.009477  |
| 72 | -0.011585 | -0.004471 | -0.001162 | -0.009770 | -0.004339 | 0.001320  | 0.004606  | -0.001453 | 0.001768  | -0.000374 | 0.005464  | 0.005968  |
| 73 | 0.018518  | -0.020060 | -0.000731 | -0.006617 | -0.010683 | 0.007518  | 0.010737  | 0.075277  | 0.012731  | 0.008213  | 0.003682  | 0.020829  |
| 74 | -0.010434 | -0.005347 | -0.001177 | -0.001303 | -0.004289 | 0.001677  | 0.008407  | -0.005628 | -0.001877 | 0.001366  | -0.003796 | -0.002281 |
| 75 | -0.005784 | 0.000076  | -0.001077 | -0.001202 | 0.001150  | -0.000273 | 0.003207  | -0.061378 | -0.003546 | 0.001375  | -0.000384 | -0.004660 |
| 76 | 0.028692  | 0.009892  | 0.001812  | -0.002754 | 0.009440  | -0.000105 | -0.010739 | -0.036317 | 0.042376  | 0.004778  | 0.017577  | 0.009069  |
| 77 | -0.017471 | -0.028527 | -0.004359 | -0.004577 | -0.007248 | -0.002611 | 0.007016  | -0.009291 | -0.046182 | 0.049496  | -0.010043 | -0.004832 |
| 78 | 0.010315  | 0.012396  | 0.001968  | 0.005126  | -0.003662 | 0.001103  | 0.000911  | 0.010571  | -0.002771 | -0.004940 | 0.004740  | -0.001334 |
| 79 | -0.013209 | 0.008011  | 0.003803  | 0.003212  | -0.000037 | 0.000848  | -0.001463 | 0.016861  | 0.006004  | -0.012905 | 0.005721  | 0.001159  |
| 80 | -0.036411 | -0.060788 | 0.009389  | -0.003089 | 0.008390  | -0.003533 | -0.004540 | -0.017241 | 0.011380  | -0.006684 | 0.008099  | 0.009333  |
| 81 | -0.002297 | 0.117789  | -0.035232 | -0.043323 | -0.019851 | 0.002321  | 0.011717  | 0.011481  | -0.010710 | -0.007341 | -0.009054 | -0.019236 |
| 82 | 0.004377  | -0.016425 | -0.020586 | -0.008724 | 0.002535  | -0.001460 | 0.001794  | 0.001463  | 0.001433  | 0.005623  | -0.033707 | -0.012612 |
| 83 | 0.004030  | -0.019828 | 0.000998  | 0.027983  | 0.012517  | 0.001027  | -0.006661 | -0.002757 | 0.006892  | 0.013088  | -0.005068 | 0.002574  |
| 84 | -0.014457 | 0.042763  | -0.002114 | 0.023491  | 0.012852  | 0.015204  | -0.004701 | -0.001100 | 0.005051  | -0.014302 | 0.016103  | 0.057438  |
| 85 | 0.009583  | 0.025514  | 0.000256  | 0.002635  | -0.022560 | -0.013304 | -0.010520 | -0.003843 | -0.014222 | -0.017355 | -0.013073 | -0.075305 |
| 86 | -0.001265 | -0.006670 | -0.001825 | -0.005678 | -0.032956 | -0.008767 | 0.012635  | 0.003496  | 0.004501  | 0.001161  | 0.000037  | 0.001219  |
| 87 | -0.000550 | -0.002761 | 0.001076  | -0.004664 | 0.009369  | -0.003002 | -0.011570 | -0.001925 | -0.000135 | 0.001481  | 0.004368  | 0.015284  |
| 88 | 0.004053  | 0.035079  | 0.004511  | 0.017539  | 0.049064  | -0.003291 | -0.029854 | -0.029897 | -0.033106 | -0.014784 | 0.001356  | -0.014682 |
| 89 | 0.001417  | 0.003094  | 0.000870  | 0.000140  | 0.000486  | -0.000880 | 0.000653  | -0.040283 | 0.024382  | 0.014078  | 0.007868  | -0.001331 |
| 90 | -0.015589 | 0.000474  | -0.019745 | -0.008730 | 0.000097  | -0.000285 | 0.003798  | 0.010566  | 0.005006  | 0.014778  | -0.020290 | -0.010584 |

|     |           |           |           |           |           |           |           |           |           |           |           |           |
|-----|-----------|-----------|-----------|-----------|-----------|-----------|-----------|-----------|-----------|-----------|-----------|-----------|
| 91  | 0.002421  | 0.004631  | -0.002548 | 0.021001  | -0.017081 | 0.000345  | -0.003285 | -0.000602 | 0.002024  | -0.000813 | -0.005760 | -0.026837 |
| 92  | 0.001478  | 0.002112  | 0.002705  | -0.003200 | 0.009190  | 0.003933  | -0.012817 | -0.000553 | -0.003140 | -0.001209 | 0.003935  | 0.006778  |
| 93  | 0.006253  | 0.002327  | 0.000588  | -0.000037 | 0.002435  | -0.000789 | -0.003573 | 0.002582  | 0.000360  | -0.000582 | 0.002561  | 0.001778  |
| 94  | 0.004155  | 0.002954  | 0.000563  | 0.001302  | 0.001858  | -0.000878 | -0.004829 | 0.003052  | 0.001567  | -0.000759 | 0.001236  | 0.000503  |
| 95  | 0.002217  | -0.000247 | 0.000388  | 0.000668  | -0.000453 | 0.000149  | -0.002038 | 0.037386  | 0.000101  | -0.001488 | -0.000293 | 0.002258  |
| 96  | 0.003515  | -0.000517 | 0.000435  | 0.000062  | -0.000422 | 0.000110  | -0.001135 | 0.022485  | 0.003514  | 0.000316  | 0.000675  | 0.002388  |
| 97  | -0.004362 | -0.007120 | -0.001081 | -0.003292 | 0.001829  | -0.000561 | 0.000146  | -0.003649 | -0.003732 | 0.004115  | -0.001216 | 0.000908  |
| 98  | -0.005234 | -0.005277 | -0.000876 | -0.001918 | 0.002006  | -0.000539 | -0.001227 | -0.006930 | 0.006935  | 0.000853  | -0.003373 | 0.000523  |
| 99  | 0.009695  | -0.003646 | -0.002209 | -0.000768 | -0.000918 | -0.000394 | 0.000952  | -0.009356 | -0.004044 | 0.011655  | -0.005112 | -0.001725 |
| 100 | 0.004877  | -0.004376 | -0.001616 | -0.002353 | 0.000558  | -0.000441 | 0.000901  | -0.007123 | -0.001925 | 0.002252  | -0.000646 | 0.000412  |
| 101 | -0.001708 | 0.013372  | 0.011387  | 0.000156  | -0.001706 | 0.000720  | -0.000146 | 0.000066  | -0.001420 | -0.002998 | 0.013169  | 0.006174  |
| 102 | -0.002662 | 0.004028  | 0.009734  | 0.005725  | -0.000776 | 0.000672  | -0.001514 | -0.001410 | 0.000017  | -0.002607 | 0.019964  | 0.005905  |
| 103 | -0.001601 | 0.005492  | -0.000410 | -0.016552 | -0.006711 | -0.000668 | 0.003250  | 0.001007  | -0.003354 | -0.005605 | 0.002872  | -0.005669 |
| 104 | -0.002384 | 0.013805  | -0.001861 | -0.010633 | -0.005776 | -0.000321 | 0.003328  | 0.001746  | -0.003544 | -0.007419 | 0.002445  | 0.003573  |
| 105 | 0.000937  | 0.003661  | 0.000645  | 0.002460  | 0.017182  | 0.003690  | -0.004629 | -0.001787 | -0.002672 | -0.001207 | 0.000074  | -0.002649 |
| 106 | 0.000116  | 0.002948  | 0.001211  | 0.003254  | 0.016539  | 0.004585  | -0.007145 | -0.001603 | -0.001765 | -0.000031 | -0.000203 | 0.001469  |
| 107 | 0.000019  | 0.001251  | -0.000343 | 0.002705  | -0.006578 | 0.002269  | 0.003274  | 0.001923  | 0.000891  | -0.000350 | -0.002686 | -0.007157 |
| 108 | 0.000896  | 0.001747  | -0.000482 | 0.001855  | -0.001284 | -0.000117 | 0.009645  | -0.000132 | -0.000851 | -0.000972 | -0.001488 | -0.007906 |
| 109 | -0.007238 | -0.000930 | -0.000170 | 0.000876  | -0.000455 | 0.000360  | 0.000714  | -0.010896 | 0.018245  | -0.012118 | -0.005905 | 0.001929  |
| 110 | 0.006211  | -0.002296 | -0.000757 | -0.001087 | 0.000032  | 0.000485  | -0.001479 | 0.050859  | -0.042370 | -0.001245 | -0.001779 | -0.000750 |
| 111 | -0.003878 | -0.011435 | 0.006659  | 0.005154  | 0.000094  | 0.000146  | -0.001074 | -0.002593 | 0.002138  | -0.038670 | 0.029455  | 0.004334  |
| 112 | 0.018244  | 0.009559  | 0.011910  | 0.003184  | -0.000418 | 0.000141  | -0.002530 | -0.007415 | -0.006005 | 0.023914  | -0.009903 | 0.005725  |
| 113 | -0.001146 | 0.003712  | -0.001907 | 0.003106  | 0.011162  | 0.007202  | 0.000292  | -0.001590 | 0.000118  | 0.000855  | 0.001894  | 0.037314  |
| 114 | -0.001336 | -0.007728 | 0.004391  | -0.023653 | 0.005345  | -0.007384 | 0.003320  | 0.001996  | -0.002046 | -0.000145 | 0.003612  | -0.010840 |
| 115 | -0.001072 | -0.002122 | -0.002059 | 0.000832  | -0.002014 | -0.008443 | 0.006785  | -0.000794 | 0.002291  | 0.000383  | -0.002172 | -0.005932 |
| 116 | -0.000272 | 0.000217  | -0.000277 | 0.002435  | -0.006514 | 0.004895  | 0.004976  | 0.000495  | 0.000498  | 0.001018  | -0.001950 | -0.000589 |
| 117 | 0.008127  | -0.001328 | -0.003183 | -0.002407 | -0.000790 | -0.000379 | -0.000618 | 0.005499  | -0.006225 | -0.009132 | 0.002648  | -0.000458 |
| 118 | 0.009661  | 0.004171  | -0.001044 | -0.000590 | -0.006210 | -0.000232 | 0.006465  | 0.002007  | -0.003446 | -0.003435 | 0.003035  | 0.000519  |
| 119 | 0.012065  | 0.004160  | -0.000977 | -0.000306 | -0.009046 | -0.000011 | 0.009084  | 0.001465  | -0.004659 | -0.003938 | 0.007177  | -0.002410 |
| 120 | 0.000813  | 0.001486  | 0.000040  | 0.000885  | -0.000297 | -0.000020 | 0.000387  | 0.001114  | -0.000422 | 0.000480  | 0.000231  | 0.000208  |
| 121 | -0.000346 | -0.000965 | -0.000041 | -0.000544 | 0.000076  | 0.000025  | -0.000134 | -0.000630 | 0.000226  | -0.000277 | -0.000032 | -0.000171 |
| 122 | -0.000464 | -0.000521 | 0.000003  | -0.000335 | 0.000233  | -0.000006 | -0.000259 | -0.000466 | 0.000189  | -0.000198 | -0.000214 | -0.000046 |
| 123 | 0.000114  | 0.002156  | -0.000069 | 0.001056  | -0.000216 | -0.000028 | -0.000220 | 0.000699  | -0.000054 | 0.000181  | -0.000648 | 0.000123  |
| 124 | -0.000424 | -0.000650 | 0.000246  | -0.000253 | 0.000543  | -0.000069 | -0.000078 | 0.000339  | 0.000215  | -0.000236 | 0.000544  | 0.000357  |
| 125 | 0.000299  | -0.001502 | -0.000178 | -0.000813 | -0.000344 | 0.000097  | 0.000304  | -0.001073 | -0.000145 | 0.000046  | 0.000132  | -0.000463 |
| 126 | 0.011965  | 0.004492  | -0.001099 | -0.000532 | -0.009743 | 0.000047  | 0.009320  | -0.000686 | -0.004194 | -0.003101 | 0.005634  | -0.002402 |
| 127 | 0.008449  | 0.003932  | -0.000565 | 0.000614  | -0.006557 | -0.000185 | 0.006241  | 0.002695  | -0.002240 | -0.001258 | 0.003307  | -0.001824 |
| 128 | 0.000249  | 0.000039  | -0.000082 | -0.000015 | -0.000174 | 0.000038  | 0.000124  | -0.000239 | -0.000191 | -0.000038 | 0.000038  | -0.000165 |
| 129 | -0.000025 | -0.000252 | 0.000022  | -0.000176 | 0.000019  | -0.000049 | 0.000189  | -0.000155 | 0.000100  | 0.000095  | 0.000046  | 0.000243  |
| 130 | -0.000256 | -0.000045 | 0.000151  | 0.000099  | 0.000159  | -0.000042 | -0.000122 | -0.000164 | 0.000452  | 0.000106  | -0.000049 | 0.000178  |
| 131 | 0.000159  | 0.000050  | -0.000054 | 0.000036  | 0.000043  | 0.000012  | 0.000003  | 0.000416  | -0.000322 | 0.000015  | -0.000198 | -0.000208 |
| 132 | -0.000284 | 0.000156  | 0.000024  | 0.000072  | 0.000021  | 0.000012  | -0.000171 | -0.000148 | 0.000346  | -0.000055 | 0.000096  | 0.000130  |
| 133 | 0.000160  | 0.000059  | -0.000065 | -0.000013 | -0.000069 | 0.000031  | -0.000026 | 0.000297  | -0.000392 | -0.000126 | 0.000064  | -0.000185 |
| 134 | -0.009314 | -0.021206 | -0.002220 | -0.018796 | 0.007542  | -0.004077 | 0.010317  | -0.026755 | 0.031226  | 0.017523  | 0.003221  | -0.001779 |
| 135 | 0.003126  | 0.010022  | -0.006033 | 0.005296  | -0.017331 | -0.008021 | 0.016935  | 0.066511  | 0.017456  | -0.008771 | 0.004483  | -0.008829 |
| 136 | -0.010699 | -0.027915 | -0.010789 | -0.016162 | 0.001826  | 0.004242  | 0.002258  | 0.002733  | 0.021429  | 0.010692  | 0.000233  | 0.000241  |
| 137 | -0.001842 | -0.024744 | -0.009115 | -0.016960 | 0.009882  | -0.000485 | 0.001195  | -0.053562 | 0.002562  | 0.007294  | -0.000072 | -0.000432 |
| 138 | 0.018313  | 0.011737  | 0.001180  | 0.004861  | -0.003149 | -0.003767 | -0.005050 | 0.061373  | 0.063660  | 0.015252  | 0.010500  | -0.003647 |
| 139 | -0.074996 | 0.009614  | -0.002383 | -0.006347 | 0.016007  | -0.000148 | -0.015467 | -0.035949 | 0.017457  | -0.010542 | 0.031647  | 0.016067  |
| 140 | 0.022739  | -0.007495 | -0.001008 | 0.003036  | -0.005445 | -0.001612 | 0.004496  | -0.060327 | -0.070466 | 0.072551  | 0.016635  | -0.008722 |



|     |           |           |           |           |           |           |           |           |           |           |           |           |
|-----|-----------|-----------|-----------|-----------|-----------|-----------|-----------|-----------|-----------|-----------|-----------|-----------|
| 141 | 0.084581  | -0.000251 | 0.001209  | -0.009887 | 0.020440  | 0.000290  | -0.020177 | -0.000927 | 0.050870  | 0.003278  | 0.017787  | 0.011343  |
| 142 | -0.071579 | 0.000598  | 0.001152  | -0.004760 | 0.020861  | -0.000667 | -0.020528 | -0.019910 | -0.001802 | -0.052684 | 0.001967  | 0.008106  |
| 143 | 0.072513  | 0.016455  | 0.014944  | 0.008999  | -0.003183 | 0.000654  | 0.004062  | -0.022851 | -0.073534 | 0.072839  | 0.071681  | 0.005875  |
| 144 | 0.006236  | -0.113277 | -0.120762 | -0.034946 | -0.001303 | 0.004822  | -0.022099 | -0.013899 | -0.020279 | -0.036148 | 0.036151  | 0.009040  |
| 145 | 0.016672  | 0.057121  | 0.118854  | 0.038699  | 0.005929  | 0.003854  | -0.000554 | -0.011858 | -0.010782 | -0.055677 | -0.062576 | 0.070181  |
| 146 | -0.000131 | -0.027005 | -0.014952 | 0.078038  | -0.001428 | 0.001856  | -0.003649 | -0.003244 | -0.000821 | -0.000430 | 0.015333  | 0.014488  |
| 147 | -0.007099 | 0.082825  | 0.198380  | -0.124290 | -0.004733 | -0.005771 | 0.012911  | 0.000529  | 0.001031  | -0.009912 | -0.038917 | -0.074424 |
| 148 | 0.000295  | 0.071582  | -0.126626 | 0.065929  | -0.017486 | 0.003722  | 0.010106  | -0.009746 | 0.004591  | -0.007612 | -0.026865 | 0.030325  |
| 149 | -0.013718 | -0.008703 | -0.025145 | 0.011873  | 0.069053  | -0.002279 | -0.072842 | 0.013246  | 0.004589  | -0.007553 | -0.013234 | -0.027468 |
| 150 | 0.005920  | 0.020274  | -0.009040 | 0.014017  | -0.069538 | 0.121983  | 0.024435  | -0.013153 | -0.002555 | -0.006119 | 0.001181  | -0.064640 |
| 151 | -0.020939 | -0.005973 | 0.003056  | 0.003521  | 0.075672  | -0.048581 | 0.085055  | 0.010510  | 0.006317  | -0.007709 | -0.009069 | 0.003748  |
| 152 | -0.011968 | -0.012989 | -0.013736 | 0.005671  | -0.082323 | 0.046401  | -0.073787 | 0.007316  | 0.005210  | -0.008617 | -0.010554 | -0.011959 |
| 153 | 0.005616  | -0.005579 | -0.014029 | -0.005024 | -0.024452 | -0.126050 | 0.070162  | 0.010700  | 0.006939  | 0.000281  | 0.011698  | -0.015954 |
| 154 | 0.019435  | -0.006606 | -0.002827 | -0.003581 | 0.003114  | -0.001761 | -0.005549 | -0.015471 | 0.012544  | 0.035468  | 0.009047  | -0.007536 |
| 155 | 0.034625  | 0.040052  | 0.033196  | 0.011029  | 0.006481  | -0.000072 | -0.005464 | -0.015721 | -0.032410 | -0.000336 | 0.020685  | 0.014768  |
| 156 | -0.003840 | 0.038153  | -0.003951 | 0.027953  | -0.035387 | 0.010176  | 0.020333  | -0.012119 | 0.005909  | -0.006371 | -0.015748 | -0.022275 |
| 157 | -0.004468 | -0.006871 | -0.012240 | -0.002256 | -0.021902 | -0.012789 | 0.034983  | 0.028384  | 0.011625  | -0.006457 | 0.006304  | -0.008419 |
| 158 | -0.000402 | -0.000188 | 0.000178  | 0.000099  | 0.001217  | 0.000023  | -0.000926 | 0.000851  | -0.000838 | -0.000763 | 0.000138  | 0.001638  |
| 159 | -0.000906 | -0.000144 | -0.000551 | -0.001878 | -0.003185 | 0.000171  | 0.001795  | -0.005021 | 0.001998  | -0.001455 | 0.004550  | 0.002749  |
| 160 | -0.001516 | 0.000455  | -0.000113 | -0.001206 | -0.002222 | 0.000097  | 0.000761  | -0.004733 | 0.002065  | -0.001092 | 0.003821  | 0.002238  |
| 161 | 0.000867  | 0.000248  | -0.000009 | 0.000344  | -0.000264 | -0.000048 | -0.000086 | -0.001073 | 0.000677  | 0.000747  | -0.000600 | -0.000620 |
| 162 | -0.001673 | 0.002090  | 0.000892  | 0.001157  | 0.001120  | -0.000394 | -0.002441 | 0.001344  | 0.000999  | -0.000818 | 0.001572  | -0.002953 |
| 163 | 0.002086  | -0.001876 | -0.001461 | 0.001456  | -0.006669 | -0.000173 | 0.001257  | -0.008627 | 0.005928  | 0.005786  | -0.004353 | -0.008296 |
| 164 | -0.016647 | -0.040446 | -0.017520 | -0.023666 | 0.003833  | 0.006002  | 0.000521  | -0.002461 | 0.008648  | 0.007053  | -0.001298 | 0.001580  |
| 165 | 0.000275  | 0.000662  | -0.000834 | -0.000638 | -0.000386 | -0.002978 | 0.006011  | -0.033022 | -0.010883 | -0.004726 | -0.001979 | -0.002168 |
| 166 | 0.003683  | 0.037919  | 0.013866  | 0.025060  | -0.013944 | -0.001703 | 0.001520  | 0.079509  | -0.005926 | -0.011316 | 0.002417  | -0.000183 |
| 167 | 0.043666  | -0.006751 | -0.000745 | -0.014779 | 0.030808  | -0.000010 | -0.030078 | -0.001790 | 0.078407  | -0.001278 | -0.000196 | 0.010149  |
| 168 | -0.131444 | -0.006288 | -0.004089 | 0.000150  | -0.000180 | -0.000743 | -0.000226 | -0.010007 | -0.027583 | -0.032237 | -0.012587 | -0.002801 |
| 169 | 0.286762  | 0.004573  | -0.002022 | 0.008548  | -0.032267 | 0.000556  | 0.030937  | 0.005972  | -0.003392 | 0.081751  | -0.003869 | -0.012506 |
| 170 | 0.004573  | 0.263453  | 0.130961  | -0.013763 | -0.013968 | 0.004885  | 0.024187  | 0.017099  | 0.008747  | 0.001159  | -0.073461 | 0.008156  |
| 171 | -0.002022 | 0.130961  | 0.470661  | -0.196078 | 0.001933  | -0.004697 | 0.017223  | 0.007640  | 0.006904  | -0.001564 | -0.069031 | -0.058490 |
| 172 | 0.008548  | -0.013763 | -0.196078 | 0.309428  | 0.003682  | 0.007229  | -0.004916 | 0.006495  | -0.000828 | -0.000773 | 0.018843  | 0.088598  |
| 173 | -0.032267 | -0.013968 | 0.001933  | 0.003682  | 0.284309  | -0.127613 | 0.043759  | 0.005531  | 0.009121  | -0.009682 | -0.012652 | 0.004291  |
| 174 | 0.000556  | 0.004885  | -0.004697 | 0.007229  | -0.127613 | 0.273118  | -0.130881 | -0.004363 | -0.003435 | -0.002517 | -0.002067 | -0.010149 |
| 175 | 0.030937  | 0.024187  | 0.017223  | -0.004916 | 0.043759  | -0.130881 | 0.287707  | -0.010108 | -0.007356 | 0.011361  | 0.011045  | -0.006171 |
| 176 | 0.005972  | 0.017099  | 0.007640  | 0.006495  | 0.005531  | -0.004363 | -0.010108 | 0.329478  | -0.076940 | -0.024230 | -0.009461 | -0.002772 |
| 177 | -0.003392 | 0.008747  | 0.006904  | -0.000828 | 0.009121  | -0.003435 | -0.007356 | -0.076940 | 0.318301  | -0.040161 | -0.016899 | 0.004537  |
| 178 | 0.081751  | 0.001159  | -0.001564 | -0.000773 | -0.009682 | -0.002517 | 0.011361  | -0.024230 | -0.040161 | 0.315699  | -0.072289 | -0.020292 |
| 179 | -0.003869 | -0.073461 | -0.069031 | 0.018843  | -0.012652 | -0.002067 | 0.011045  | -0.009461 | -0.016899 | -0.072289 | 0.290040  | -0.013833 |
| 180 | -0.012506 | 0.008156  | -0.058490 | 0.088598  | 0.004291  | -0.010149 | -0.006171 | -0.002772 | 0.004537  | -0.020292 | -0.013833 | 0.302989  |
| 181 | -0.006395 | -0.009389 | -0.043704 | 0.009698  | 0.075146  | -0.028752 | -0.004962 | 0.006801  | -0.003229 | -0.011192 | -0.009142 | -0.064141 |
| 182 | 0.010910  | -0.011417 | -0.020798 | -0.008220 | 0.003081  | -0.031751 | 0.077357  | -0.021030 | -0.012664 | -0.002516 | 0.010195  | -0.018600 |
| 183 | 0.007166  | -0.008635 | -0.005632 | -0.008036 | -0.000277 | -0.010139 | -0.000939 | -0.039543 | -0.017177 | 0.010742  | -0.005477 | -0.009304 |
| 184 | -0.001150 | 0.000559  | -0.000220 | -0.001064 | -0.003095 | -0.000001 | 0.000670  | -0.004632 | 0.002446  | 0.000109  | 0.002751  | 0.000542  |
| 185 | -0.001036 | -0.000430 | -0.000875 | -0.002755 | -0.004258 | 0.000172  | 0.002839  | -0.006032 | 0.002199  | -0.001879 | 0.006053  | 0.004045  |
| 186 | -0.000752 | 0.000130  | 0.000356  | 0.000511  | 0.001125  | -0.000060 | -0.000952 | 0.000809  | -0.000693 | -0.000091 | -0.000295 | -0.000176 |
| 187 | 0.001928  | -0.000318 | 0.000323  | 0.001846  | 0.003596  | -0.000024 | -0.001763 | 0.006751  | -0.002386 | 0.001225  | -0.005749 | -0.002616 |
| 188 | 0.001216  | 0.000089  | 0.000410  | 0.001515  | 0.002701  | -0.000099 | -0.000837 | 0.003374  | -0.001742 | 0.000588  | -0.002884 | -0.001848 |
| 189 | 0.000028  | -0.000127 | -0.000055 | -0.000063 | 0.000072  | -0.000018 | -0.000043 | 0.000095  | -0.000058 | 0.000055  | -0.000073 | -0.000130 |
| 190 | -0.000302 | -0.000225 | -0.000036 | -0.000186 | 0.000480  | 0.000003  | -0.001127 | 0.014181  | -0.014302 | 0.001182  | 0.001093  | -0.000175 |

|     |           |           |           |           |           |           |           |           |           |           |           |           |
|-----|-----------|-----------|-----------|-----------|-----------|-----------|-----------|-----------|-----------|-----------|-----------|-----------|
| 191 | -0.003713 | -0.002498 | -0.000971 | 0.000097  | -0.000366 | -0.000009 | -0.001455 | -0.010506 | 0.009404  | 0.003226  | -0.001825 | -0.003058 |
| 192 | 0.002250  | 0.000771  | 0.000260  | -0.000147 | 0.000448  | -0.000150 | 0.000388  | 0.003385  | -0.000191 | -0.001016 | 0.000468  | 0.000675  |
| 193 | -0.000488 | 0.000687  | 0.000181  | 0.000293  | 0.000134  | 0.000079  | -0.000111 | 0.003621  | -0.000319 | -0.002382 | -0.000499 | 0.000323  |
| 194 | 0.001192  | 0.000694  | 0.000214  | 0.000160  | 0.000125  | -0.000001 | 0.000009  | -0.000070 | 0.000243  | -0.000080 | 0.000311  | 0.000382  |
| 195 | 0.002440  | 0.002859  | 0.000950  | -0.000031 | 0.000417  | 0.000072  | 0.000820  | -0.006345 | 0.007085  | -0.005004 | 0.001951  | 0.002798  |
| 196 | -0.000615 | 0.000283  | 0.000037  | 0.000341  | -0.000006 | 0.000000  | -0.000019 | -0.000574 | 0.002229  | -0.000929 | -0.000620 | -0.000231 |
| 197 | 0.000072  | -0.000079 | -0.000012 | -0.000021 | -0.000111 | -0.000005 | 0.000117  | 0.000905  | -0.001127 | 0.000184  | 0.000051  | -0.000068 |
| 198 | 0.000129  | 0.000095  | 0.000018  | -0.000005 | 0.000017  | -0.000005 | -0.000001 | 0.000223  | 0.000010  | -0.000227 | 0.000057  | 0.000034  |
| 199 | 0.000201  | 0.000171  | 0.000062  | -0.000023 | 0.000017  | -0.000007 | 0.000104  | -0.000615 | 0.000631  | -0.000301 | 0.000113  | 0.000153  |
| 200 | -0.000035 | 0.000228  | 0.000076  | -0.000030 | 0.000335  | -0.000013 | -0.000186 | 0.001033  | -0.000319 | -0.000725 | 0.000240  | 0.000196  |
| 201 | -0.003074 | -0.006559 | -0.003573 | 0.001179  | -0.000880 | 0.000005  | 0.000402  | 0.001283  | 0.002696  | -0.016543 | 0.013408  | -0.000608 |
| 202 | 0.000396  | -0.000142 | -0.001401 | 0.001254  | -0.000400 | 0.000089  | -0.000254 | -0.000386 | -0.000741 | -0.001220 | 0.001633  | 0.000347  |
| 203 | 0.001158  | -0.001957 | -0.000356 | -0.000699 | -0.000451 | -0.000080 | 0.000352  | 0.000147  | 0.000263  | 0.004539  | -0.002542 | -0.001647 |
| 204 | 0.001586  | -0.000367 | -0.001577 | 0.001942  | -0.000313 | 0.000039  | -0.000063 | -0.000794 | -0.001567 | 0.001698  | 0.001347  | -0.000213 |
| 205 | -0.000120 | 0.000679  | 0.002225  | -0.003578 | 0.001332  | -0.000075 | 0.000281  | 0.001247  | -0.001205 | -0.005939 | 0.005481  | 0.001619  |
| 206 | 0.004396  | 0.004621  | 0.001235  | -0.000214 | 0.000506  | 0.000075  | -0.000399 | -0.000651 | 0.000546  | 0.012717  | -0.014153 | 0.001555  |
| 207 | -0.002128 | 0.000150  | -0.000733 | 0.000119  | 0.000120  | 0.000011  | -0.000143 | -0.000270 | -0.000129 | 0.000090  | 0.000301  | 0.000165  |
| 208 | -0.000238 | -0.000385 | -0.000101 | 0.000093  | -0.000094 | -0.000005 | 0.000036  | 0.000090  | -0.000065 | -0.001064 | 0.001034  | -0.000045 |
| 209 | 0.000238  | -0.000086 | -0.000073 | 0.000071  | -0.000001 | -0.000003 | -0.000002 | -0.000030 | -0.000060 | 0.000002  | 0.000156  | 0.000040  |
| 210 | 0.000298  | 0.000529  | 0.000432  | -0.000059 | -0.000022 | -0.000009 | 0.000061  | -0.000055 | -0.000027 | 0.000944  | -0.000947 | 0.000097  |
| 211 | 0.000095  | 0.001372  | 0.002451  | -0.000284 | 0.000221  | -0.000040 | 0.000119  | 0.000147  | 0.000262  | -0.000348 | -0.000078 | 0.000217  |
| 212 | 0.000544  | 0.000522  | 0.001589  | -0.005677 | 0.001514  | -0.000646 | 0.000925  | 0.000338  | -0.000553 | 0.000284  | 0.000474  | -0.012609 |
| 213 | 0.000905  | 0.002420  | 0.001769  | 0.000125  | 0.001729  | -0.001043 | 0.002671  | 0.002144  | -0.001736 | -0.000772 | 0.001202  | 0.003548  |
| 214 | -0.000057 | -0.001953 | 0.000642  | -0.001369 | -0.001115 | 0.000638  | -0.001062 | 0.000199  | 0.000023  | 0.000266  | 0.001128  | 0.000797  |
| 215 | -0.000110 | 0.000687  | 0.001206  | -0.000741 | -0.000381 | 0.000680  | 0.000560  | -0.000950 | 0.000796  | 0.000631  | -0.000476 | -0.004783 |
| 216 | -0.000084 | -0.001807 | -0.000963 | -0.000207 | -0.001691 | 0.000378  | -0.001054 | -0.001006 | 0.000650  | 0.000397  | 0.000110  | 0.000774  |
| 217 | 0.000286  | 0.001537  | -0.000299 | 0.002000  | -0.005777 | 0.001662  | 0.000855  | 0.000085  | -0.001088 | -0.001604 | 0.000829  | 0.018279  |
| 218 | -0.000285 | -0.000325 | 0.000157  | -0.000202 | 0.002117  | -0.001109 | -0.000385 | -0.000067 | 0.000227  | -0.000016 | -0.000435 | -0.000726 |
| 219 | 0.000003  | -0.000068 | 0.000029  | -0.000223 | 0.000513  | -0.000121 | -0.000075 | -0.000041 | 0.000138  | 0.000195  | -0.000111 | -0.001320 |
| 220 | 0.000068  | 0.000069  | 0.000206  | -0.000168 | -0.000208 | 0.000012  | 0.000114  | 0.000032  | -0.000025 | 0.000028  | 0.000147  | 0.000211  |
| 221 | -0.000044 | -0.000114 | -0.000213 | 0.000575  | -0.000225 | 0.000033  | -0.000154 | -0.000147 | 0.000187  | 0.000152  | -0.000290 | 0.000742  |
| 222 | -0.000177 | -0.000740 | -0.001245 | 0.002137  | -0.000392 | 0.000489  | -0.000107 | -0.000419 | 0.000514  | 0.000543  | -0.000025 | -0.000052 |
| 223 | 0.000237  | -0.000046 | -0.000264 | -0.000667 | 0.001352  | -0.000678 | 0.001687  | 0.001427  | -0.000715 | -0.001139 | 0.000610  | -0.001165 |
| 224 | 0.000107  | 0.000105  | 0.000039  | 0.000274  | 0.000118  | -0.000459 | 0.001622  | -0.000918 | 0.000407  | 0.000641  | -0.000497 | 0.000290  |
| 225 | -0.000368 | 0.000120  | -0.000043 | 0.000111  | -0.001075 | 0.000799  | -0.001269 | 0.001137  | 0.000775  | -0.000107 | 0.000060  | 0.000135  |
| 226 | -0.000014 | 0.000128  | 0.000292  | 0.000163  | 0.000591  | 0.000822  | -0.000320 | -0.000365 | 0.000262  | 0.000217  | 0.000035  | 0.000773  |
| 227 | 0.000116  | -0.000296 | -0.000091 | 0.000495  | -0.001847 | 0.000506  | -0.000629 | -0.000600 | 0.000194  | 0.001096  | -0.001015 | -0.000874 |
| 228 | 0.000024  | 0.001080  | 0.000210  | 0.000307  | 0.001197  | 0.001556  | -0.006527 | 0.002107  | -0.001406 | -0.001470 | 0.000404  | 0.001072  |
| 229 | -0.000002 | -0.000006 | 0.000060  | -0.000197 | 0.000245  | -0.001335 | 0.002279  | 0.000003  | -0.000197 | -0.000215 | 0.000388  | 0.000388  |
| 230 | 0.000101  | 0.000019  | -0.000010 | -0.000075 | 0.000140  | -0.000208 | 0.000474  | 0.000235  | -0.000052 | -0.000092 | 0.000078  | -0.000078 |
| 231 | 0.000012  | 0.000039  | 0.000010  | -0.000002 | 0.000009  | 0.000017  | -0.000214 | 0.000143  | 0.000020  | -0.000087 | 0.000072  | -0.000005 |
| 232 | 0.000006  | -0.000003 | 0.000002  | 0.000047  | -0.000080 | -0.000012 | -0.000230 | -0.000073 | 0.000020  | 0.000098  | -0.000067 | 0.000015  |
| 233 | -0.000392 | -0.000048 | -0.000028 | -0.000047 | 0.000046  | 0.000427  | -0.000416 | 0.000973  | 0.000415  | -0.000146 | 0.000035  | 0.000021  |
| 234 | 0.004154  | 0.004262  | 0.001297  | 0.001469  | -0.001224 | 0.000484  | 0.001910  | -0.019816 | 0.017563  | -0.004264 | 0.000193  | 0.003058  |
| 235 | -0.005826 | -0.006069 | -0.001827 | -0.001786 | -0.000369 | -0.000309 | -0.001915 | 0.006596  | -0.019442 | 0.010314  | 0.001216  | -0.004138 |
| 236 | -0.000662 | -0.000296 | -0.000119 | -0.000101 | 0.000559  | -0.000096 | -0.000661 | -0.001799 | 0.004777  | -0.000218 | -0.000148 | -0.000326 |
| 237 | 0.000321  | -0.000657 | -0.000282 | -0.000146 | 0.000628  | -0.000129 | -0.000476 | -0.001422 | 0.005670  | 0.000267  | -0.001030 | -0.000994 |
| 238 | -0.000003 | 0.000319  | 0.000129  | 0.000151  | -0.000148 | 0.000019  | 0.000203  | 0.007542  | -0.006336 | -0.000918 | -0.000122 | 0.000306  |
| 239 | 0.000169  | 0.000351  | 0.000124  | 0.000136  | -0.000025 | 0.000025  | 0.000116  | 0.006352  | -0.005078 | -0.000885 | -0.000156 | 0.000298  |
| 240 | -0.000965 | -0.000690 | -0.000242 | -0.000029 | -0.000326 | 0.000025  | -0.000070 | -0.003800 | 0.000960  | 0.001550  | -0.000047 | -0.000644 |

|     |           |           |           |           |           |           |           |           |           |           |           |           |
|-----|-----------|-----------|-----------|-----------|-----------|-----------|-----------|-----------|-----------|-----------|-----------|-----------|
| 241 | -0.001118 | -0.000836 | -0.000293 | -0.000027 | -0.000362 | 0.000029  | -0.000114 | -0.004437 | 0.001539  | 0.001792  | -0.000186 | -0.000791 |
| 242 | 0.000808  | -0.000010 | 0.000000  | -0.000101 | 0.000124  | -0.000063 | 0.000144  | -0.003587 | 0.004505  | -0.000060 | -0.000179 | 0.000038  |
| 243 | 0.001090  | -0.000010 | -0.000009 | -0.000043 | 0.000073  | -0.000064 | 0.000171  | -0.005162 | 0.006270  | 0.000201  | -0.000354 | -0.000029 |
| 244 | 0.001550  | 0.001797  | 0.000643  | 0.000143  | 0.000454  | 0.000022  | 0.000679  | 0.010941  | -0.006441 | -0.003879 | 0.000452  | 0.001757  |
| 245 | 0.000465  | 0.001845  | 0.000581  | 0.000339  | 0.000612  | 0.000055  | 0.000016  | 0.008558  | -0.003918 | -0.003924 | 0.000352  | 0.001467  |
| 246 | 0.001108  | 0.008701  | 0.000985  | -0.003851 | 0.002251  | 0.000134  | -0.001090 | -0.001179 | -0.000901 | 0.018273  | -0.020733 | 0.003301  |
| 247 | -0.003873 | -0.006394 | 0.001755  | 0.002083  | -0.001541 | -0.000046 | 0.000735  | 0.003177  | 0.003862  | -0.033683 | 0.023631  | 0.000397  |
| 248 | 0.000239  | -0.000886 | -0.001063 | 0.000770  | -0.000600 | 0.000007  | 0.000045  | -0.000324 | 0.001309  | 0.006088  | -0.004836 | -0.001682 |
| 249 | 0.001762  | -0.001537 | -0.001174 | 0.001249  | -0.001154 | -0.000003 | 0.000236  | -0.000915 | 0.000354  | 0.010619  | -0.006850 | -0.002664 |
| 250 | -0.000609 | -0.001496 | -0.001046 | 0.000950  | -0.000054 | -0.000014 | 0.000016  | -0.000232 | -0.001005 | -0.005392 | 0.006872  | 0.000311  |
| 251 | -0.000364 | -0.001463 | -0.001214 | 0.000636  | 0.000050  | -0.000009 | 0.000000  | -0.000112 | -0.000984 | -0.004025 | 0.005370  | 0.000178  |
| 252 | -0.000943 | 0.001202  | 0.000982  | -0.001016 | 0.000370  | 0.000003  | -0.000081 | 0.000531  | -0.000181 | -0.003262 | 0.001481  | 0.000709  |
| 253 | -0.001167 | 0.001219  | 0.000750  | -0.000914 | 0.000353  | 0.000005  | -0.000093 | 0.000475  | -0.000128 | -0.003013 | 0.001265  | 0.000735  |
| 254 | 0.001830  | -0.000007 | 0.000595  | 0.000406  | -0.000475 | -0.000009 | 0.000117  | -0.000388 | 0.000492  | 0.007919  | -0.007003 | -0.001205 |
| 255 | 0.001773  | 0.000234  | 0.000692  | 0.000174  | -0.000484 | -0.000010 | 0.000125  | -0.000542 | 0.000689  | 0.009201  | -0.008130 | -0.001295 |
| 256 | 0.000167  | -0.000035 | -0.000784 | -0.000247 | 0.000671  | -0.000034 | 0.000041  | -0.000140 | -0.002094 | -0.002076 | 0.005675  | 0.000621  |
| 257 | 0.000137  | 0.000481  | -0.000483 | -0.000219 | 0.000606  | -0.000022 | -0.000054 | -0.000366 | -0.001450 | -0.000541 | 0.003210  | 0.000590  |
| 258 | 0.000157  | -0.000055 | -0.002483 | 0.003428  | -0.003532 | -0.001728 | -0.002106 | -0.002235 | 0.000303  | -0.001714 | -0.001115 | 0.029802  |
| 259 | 0.001225  | 0.002820  | -0.000674 | -0.001517 | 0.004113  | -0.000453 | 0.002985  | 0.004126  | -0.002488 | 0.000254  | 0.000216  | -0.020570 |
| 260 | 0.000203  | -0.000294 | 0.001435  | -0.000544 | -0.000035 | 0.000207  | 0.001037  | 0.001199  | -0.000927 | -0.000435 | 0.001582  | 0.003666  |
| 261 | -0.000007 | -0.000073 | 0.001755  | 0.000082  | 0.000048  | 0.000529  | 0.000622  | 0.001041  | -0.000466 | -0.000204 | 0.001456  | 0.003737  |
| 262 | -0.000329 | -0.000130 | 0.000017  | -0.001780 | 0.000831  | -0.000049 | -0.000799 | -0.001148 | 0.000994  | 0.000894  | -0.001095 | -0.010522 |
| 263 | -0.000360 | -0.000343 | 0.000116  | -0.001716 | 0.000647  | -0.000144 | -0.000813 | -0.001092 | 0.000911  | 0.000685  | -0.000851 | -0.008399 |
| 264 | 0.000242  | 0.000393  | -0.000417 | 0.001502  | 0.000966  | -0.000453 | 0.000675  | 0.000624  | -0.000409 | -0.000340 | 0.000021  | 0.002528  |
| 265 | 0.000311  | 0.000477  | -0.000239 | 0.001255  | 0.001048  | -0.000616 | 0.000775  | 0.000673  | -0.000500 | -0.000397 | 0.000113  | 0.002825  |
| 266 | -0.000003 | -0.000469 | -0.000121 | 0.000548  | -0.001269 | 0.000503  | -0.000534 | 0.000343  | -0.000140 | 0.000045  | 0.000467  | 0.004410  |
| 267 | -0.000044 | -0.000983 | -0.000293 | 0.000743  | -0.001252 | 0.000382  | -0.000983 | 0.000195  | -0.000005 | 0.000100  | 0.000417  | 0.005268  |
| 268 | -0.001062 | -0.000966 | 0.000656  | -0.000969 | -0.000321 | 0.001004  | -0.000952 | -0.002278 | 0.002096  | 0.001021  | -0.001084 | -0.008682 |
| 269 | -0.000327 | -0.000409 | 0.000267  | -0.001082 | -0.001263 | 0.000816  | 0.000079  | -0.001451 | 0.000629  | 0.000100  | -0.000111 | -0.004125 |
| 270 | 0.001485  | 0.000349  | 0.000643  | 0.000973  | -0.002085 | -0.001731 | -0.002125 | -0.001649 | -0.003119 | 0.001032  | -0.000835 | 0.000531  |
| 271 | -0.000395 | -0.001273 | -0.001334 | -0.000707 | 0.000669  | -0.000450 | 0.004907  | -0.002249 | 0.001738  | 0.000806  | -0.001041 | -0.003066 |
| 272 | -0.000429 | 0.000451  | 0.000028  | -0.000689 | 0.001763  | -0.000085 | -0.001089 | 0.002897  | -0.000218 | -0.001899 | 0.001403  | 0.000647  |
| 273 | -0.000479 | 0.000528  | 0.000166  | -0.000333 | 0.000832  | 0.000799  | -0.001743 | 0.002373  | 0.000183  | -0.001387 | 0.001112  | 0.001031  |
| 274 | 0.000124  | -0.000116 | 0.000059  | -0.000024 | 0.000083  | -0.000138 | 0.001163  | -0.000501 | 0.000335  | 0.000278  | 0.000009  | 0.000144  |
| 275 | 0.000033  | -0.000089 | 0.000085  | 0.000214  | -0.000440 | -0.000117 | 0.000938  | -0.000784 | 0.000463  | 0.000552  | -0.000316 | 0.000064  |
| 276 | 0.000153  | -0.000383 | -0.000110 | 0.000454  | -0.001151 | -0.000155 | 0.001755  | -0.002089 | 0.000349  | 0.001451  | -0.001105 | -0.000779 |
| 277 | 0.000189  | -0.000387 | -0.000106 | 0.000327  | -0.000913 | -0.000337 | 0.001844  | -0.001891 | 0.000190  | 0.001246  | -0.000910 | -0.000709 |
| 278 | -0.000268 | 0.000156  | -0.000004 | -0.000423 | 0.000490  | 0.000269  | -0.001980 | 0.001529  | -0.000107 | -0.001069 | 0.000879  | 0.000649  |
| 279 | -0.000239 | 0.000251  | 0.000017  | -0.000413 | 0.000376  | 0.000076  | -0.002118 | 0.002043  | -0.000264 | -0.001199 | 0.000929  | 0.000701  |
| 280 | 0.000052  | 0.000045  | 0.000292  | -0.000026 | 0.000217  | 0.000912  | -0.000204 | -0.000114 | 0.000293  | 0.000102  | 0.000331  | 0.000736  |
| 281 | -0.000233 | 0.000467  | 0.000263  | 0.000644  | 0.000154  | 0.000952  | -0.001353 | 0.000462  | 0.000169  | 0.000080  | -0.000454 | 0.000049  |
| 282 | 0.004297  | -0.001498 | -0.000228 | -0.001035 | 0.000353  | 0.000074  | -0.000106 | 0.010411  | -0.012526 | 0.004853  | 0.000920  | -0.000620 |
| 283 | -0.000003 | -0.000642 | -0.000105 | -0.000170 | -0.000161 | -0.000028 | 0.000241  | -0.001195 | 0.001396  | 0.001125  | -0.000401 | -0.000351 |
| 284 | -0.000660 | -0.000329 | -0.000100 | -0.000040 | -0.000056 | 0.000010  | -0.000003 | -0.003170 | 0.001597  | 0.000510  | 0.000024  | -0.000253 |
| 285 | -0.000797 | 0.000169  | 0.000039  | 0.000249  | -0.000127 | -0.000004 | -0.000097 | -0.004222 | 0.004766  | -0.000530 | -0.000395 | -0.000134 |
| 286 | 0.000098  | 0.000632  | 0.000188  | 0.000240  | 0.000043  | -0.000043 | -0.000040 | -0.000238 | 0.002123  | -0.001050 | -0.000127 | 0.000362  |
| 287 | -0.001386 | 0.000096  | 0.000074  | 0.000312  | -0.000231 | -0.000075 | 0.000196  | -0.002823 | 0.005071  | -0.000585 | -0.000594 | 0.000022  |
| 288 | -0.005743 | -0.004831 | -0.001903 | -0.002102 | 0.000726  | -0.000212 | 0.000620  | 0.001347  | 0.003507  | -0.012343 | 0.008741  | -0.000099 |
| 289 | -0.000463 | 0.000349  | -0.000544 | -0.000367 | 0.000220  | -0.000065 | -0.000003 | -0.000170 | 0.000324  | -0.000231 | 0.000748  | 0.000357  |
| 290 | -0.000679 | 0.001758  | 0.001484  | -0.000496 | 0.000109  | 0.000020  | -0.000107 | 0.000211  | 0.000305  | 0.000638  | -0.002002 | 0.000147  |

|     |           |           |           |           |           |           |           |           |           |           |           |           |
|-----|-----------|-----------|-----------|-----------|-----------|-----------|-----------|-----------|-----------|-----------|-----------|-----------|
| 291 | 0.001366  | 0.000998  | 0.000744  | 0.000281  | -0.000142 | -0.000003 | -0.000103 | -0.000479 | -0.000415 | 0.004342  | -0.003464 | -0.000240 |
| 292 | 0.002055  | -0.001276 | -0.000841 | 0.000470  | -0.000215 | 0.000003  | 0.000026  | -0.000379 | -0.000870 | 0.002717  | -0.000794 | -0.000498 |
| 293 | 0.001517  | 0.000490  | -0.000063 | 0.000353  | -0.000122 | 0.000033  | -0.000075 | -0.000502 | -0.001049 | 0.003322  | -0.001144 | -0.000279 |
| 294 | -0.000701 | 0.005284  | -0.001362 | 0.006577  | 0.000879  | 0.003436  | 0.002288  | 0.000874  | 0.000109  | -0.000829 | -0.001992 | 0.009879  |
| 295 | -0.000440 | 0.001439  | -0.000812 | 0.001595  | -0.000030 | -0.000302 | 0.000115  | 0.000072  | 0.000071  | -0.000425 | -0.000937 | 0.001948  |
| 296 | 0.000274  | -0.000458 | 0.000695  | -0.002204 | -0.001185 | 0.000304  | -0.000245 | -0.000126 | -0.000070 | 0.000334  | 0.000653  | -0.002212 |
| 297 | 0.000209  | -0.001061 | 0.000597  | -0.001826 | 0.000158  | -0.000675 | -0.000040 | -0.000259 | -0.000049 | 0.000180  | 0.000630  | -0.003345 |
| 298 | 0.000000  | -0.000072 | -0.000434 | 0.000537  | 0.001519  | -0.000801 | 0.000445  | 0.000059  | -0.000043 | -0.000228 | -0.000134 | -0.000326 |
| 299 | 0.000246  | -0.000562 | -0.000177 | -0.000602 | 0.000240  | -0.000354 | -0.000250 | -0.000300 | -0.000115 | 0.000083  | 0.000656  | 0.000320  |
| 300 | 0.001042  | 0.000317  | 0.000444  | 0.000024  | 0.001069  | 0.003422  | -0.000294 | -0.002257 | -0.000535 | 0.000793  | 0.000680  | 0.002290  |
| 301 | 0.000148  | 0.000188  | -0.000027 | 0.000342  | 0.000026  | -0.000304 | -0.000779 | -0.001065 | -0.000600 | 0.000188  | -0.000424 | -0.000264 |
| 302 | -0.000145 | 0.000000  | 0.000026  | 0.000041  | -0.000281 | 0.000267  | -0.000705 | 0.000549  | 0.000423  | -0.000067 | -0.000006 | 0.000166  |
| 303 | -0.000207 | -0.000095 | -0.000101 | 0.000022  | -0.000199 | -0.000732 | 0.000696  | 0.000532  | 0.000235  | -0.000016 | -0.000230 | -0.000487 |
| 304 | 0.000028  | -0.000286 | -0.000104 | -0.000163 | 0.000026  | -0.000739 | 0.001945  | -0.000824 | -0.000019 | 0.000306  | -0.000126 | -0.000360 |
| 305 | -0.000339 | 0.000048  | -0.000143 | 0.000192  | -0.000749 | -0.000913 | 0.000753  | 0.000265  | -0.000057 | -0.000185 | -0.000420 | -0.000647 |
| 306 | -0.002197 | 0.000563  | 0.000251  | 0.000998  | 0.001948  | -0.000597 | -0.002099 | 0.013214  | 0.040122  | -0.009974 | -0.007300 | -0.001390 |
| 307 | 0.000057  | -0.000349 | 0.000029  | 0.000113  | -0.000323 | -0.000031 | 0.000080  | -0.006420 | 0.008344  | 0.001049  | -0.001002 | -0.000465 |
| 308 | 0.000394  | -0.000547 | -0.000157 | -0.000358 | 0.000158  | 0.000059  | -0.000083 | 0.002613  | -0.005473 | 0.001270  | 0.000652  | -0.000238 |
| 309 | 0.001013  | 0.000043  | 0.000001  | -0.000128 | 0.000141  | -0.000004 | -0.000002 | 0.003268  | -0.003425 | 0.000235  | 0.000313  | 0.000153  |
| 310 | -0.000371 | 0.000307  | 0.000062  | 0.000177  | -0.000033 | 0.000011  | -0.000147 | -0.001677 | 0.002569  | -0.000836 | -0.000234 | 0.000027  |
| 311 | -0.001327 | -0.000401 | -0.000120 | 0.000013  | -0.000205 | 0.000016  | 0.000155  | -0.005184 | 0.003133  | 0.000527  | -0.000147 | -0.000288 |
| 312 | 0.000247  | 0.000915  | 0.000176  | 0.000168  | 0.000266  | -0.000051 | -0.000007 | 0.007481  | -0.005301 | -0.002181 | 0.000430  | 0.000794  |
| 313 | 0.012944  | -0.012587 | -0.014901 | -0.000816 | -0.000317 | -0.000146 | 0.002159  | -0.005309 | -0.016300 | 0.015747  | 0.032950  | -0.004018 |
| 314 | 0.003176  | -0.001443 | -0.000062 | 0.000129  | -0.000309 | -0.000121 | 0.000216  | -0.000968 | -0.000626 | 0.007736  | -0.004682 | -0.001146 |
| 315 | -0.003683 | 0.001482  | 0.000754  | -0.001085 | 0.000501  | -0.000010 | -0.000053 | 0.000806  | 0.001733  | -0.006109 | 0.002524  | 0.000911  |
| 316 | -0.000636 | -0.001520 | -0.000722 | -0.000114 | 0.000032  | 0.000001  | 0.000086  | 0.000356  | 0.000198  | -0.002612 | 0.002249  | -0.000116 |
| 317 | 0.001515  | -0.000001 | 0.000212  | 0.000697  | -0.000276 | 0.000004  | 0.000007  | -0.000400 | -0.000576 | 0.003212  | -0.002133 | -0.000381 |
| 318 | -0.000288 | 0.002897  | 0.001999  | -0.000652 | 0.000124  | 0.000027  | -0.000165 | 0.000014  | 0.000140  | 0.001986  | -0.003316 | 0.000416  |
| 319 | -0.000131 | -0.001419 | -0.002154 | 0.001020  | -0.000077 | 0.000097  | -0.000085 | 0.000211  | -0.000830 | -0.004320 | 0.005400  | 0.000310  |
| 320 | -0.004238 | 0.004947  | -0.016090 | 0.016466  | 0.010819  | -0.010840 | -0.004728 | -0.003607 | 0.004186  | -0.001617 | -0.012674 | 0.010919  |
| 321 | 0.000106  | 0.000302  | 0.000074  | -0.000703 | 0.001681  | -0.001115 | 0.001634  | -0.000106 | -0.000235 | -0.000358 | 0.000216  | -0.002840 |
| 322 | -0.000078 | 0.000629  | 0.000238  | -0.000085 | -0.001685 | 0.001396  | -0.000590 | -0.000044 | 0.000144  | 0.000225  | 0.000003  | 0.001189  |
| 323 | -0.000167 | 0.000986  | -0.000408 | 0.001860  | 0.000520  | 0.000462  | 0.000396  | 0.000401  | 0.000027  | -0.000200 | -0.000682 | 0.002395  |
| 324 | 0.000112  | -0.000976 | 0.000302  | -0.000946 | 0.000386  | -0.000563 | 0.000048  | -0.000138 | -0.000046 | 0.000076  | 0.000329  | -0.001847 |
| 325 | 0.000468  | -0.001381 | 0.001200  | -0.003930 | -0.001860 | -0.000168 | -0.000633 | -0.000457 | -0.000102 | 0.000548  | 0.001336  | -0.004651 |
| 326 | -0.000427 | 0.000410  | -0.001386 | 0.003735  | 0.000925  | -0.000018 | -0.000865 | 0.000353  | 0.000200  | -0.000282 | -0.001174 | 0.005654  |
| 327 | -0.000121 | -0.003644 | -0.002093 | -0.001373 | -0.000797 | -0.012685 | 0.010052  | -0.014146 | -0.005572 | 0.001854  | -0.002907 | -0.006874 |
| 328 | 0.000215  | -0.000492 | -0.000163 | -0.000197 | 0.000037  | -0.001169 | 0.003454  | -0.001534 | 0.000088  | 0.000828  | -0.000252 | -0.000333 |
| 329 | 0.000033  | 0.000395  | 0.000201  | 0.000238  | -0.000166 | 0.001453  | -0.002493 | 0.000791  | 0.000072  | -0.000267 | 0.000196  | 0.000767  |
| 330 | 0.000190  | -0.000076 | 0.000069  | -0.000124 | 0.000458  | 0.000581  | 0.000088  | -0.000751 | -0.000034 | 0.000197  | 0.000184  | 0.000363  |
| 331 | -0.000059 | -0.000028 | -0.000076 | -0.000085 | 0.000157  | -0.000599 | 0.000662  | 0.000627  | -0.000071 | -0.000178 | -0.000002 | -0.000390 |
| 332 | -0.000289 | -0.000150 | -0.000014 | -0.000002 | -0.000843 | -0.000123 | -0.000573 | 0.000728  | 0.000779  | 0.000010  | -0.000009 | 0.000121  |
| 333 | -0.000101 | 0.000353  | -0.000020 | 0.000169  | 0.000352  | -0.000140 | -0.001170 | 0.000171  | -0.000819 | -0.000600 | -0.000117 | -0.000533 |

|   | 181       | 182       | 183       | 184       | 185       | 186       | 187       | 188       | 189       | 190       | 191       | 192       |
|---|-----------|-----------|-----------|-----------|-----------|-----------|-----------|-----------|-----------|-----------|-----------|-----------|
| 1 | 0.000638  | -0.001203 | 0.006531  | 0.003977  | 0.003689  | -0.000593 | -0.003092 | -0.004518 | -0.000142 | 0.000117  | -0.000716 | 0.000125  |
| 2 | -0.007442 | -0.004619 | -0.000880 | -0.000543 | -0.000742 | 0.000396  | 0.000597  | 0.000100  | 0.000112  | -0.000477 | 0.001454  | -0.000209 |
| 3 | 0.022601  | -0.012780 | 0.035345  | -0.000659 | -0.002826 | 0.000422  | 0.003873  | -0.000829 | 0.000045  | -0.014261 | 0.004952  | -0.003796 |
| 4 | 0.012499  | 0.014543  | -0.012884 | -0.000991 | 0.002325  | -0.000736 | -0.003146 | 0.002516  | 0.000064  | 0.010819  | -0.000949 | 0.001865  |

|    |           |           |           |           |           |           |           |           |           |           |           |           |
|----|-----------|-----------|-----------|-----------|-----------|-----------|-----------|-----------|-----------|-----------|-----------|-----------|
| 5  | -0.004400 | 0.022021  | -0.003737 | -0.001520 | 0.004438  | 0.000512  | -0.003346 | -0.000235 | 0.000035  | 0.000118  | 0.000395  | -0.000031 |
| 6  | 0.001853  | 0.002368  | -0.057120 | 0.003476  | -0.002589 | -0.000592 | 0.002187  | -0.002445 | -0.000131 | -0.000257 | 0.001375  | 0.000079  |
| 7  | -0.000479 | 0.001729  | -0.007141 | -0.002871 | -0.004114 | 0.002653  | 0.004476  | -0.000559 | 0.000086  | 0.000931  | 0.000289  | -0.000454 |
| 8  | 0.009198  | -0.020239 | 0.078859  | -0.005364 | -0.007886 | -0.000086 | 0.013572  | -0.000084 | 0.000100  | -0.004983 | -0.003583 | -0.000028 |
| 9  | -0.005571 | -0.016566 | -0.026197 | -0.001627 | -0.001923 | 0.000155  | 0.003965  | -0.000902 | 0.000053  | -0.009178 | 0.011562  | -0.007476 |
| 10 | 0.008502  | 0.018800  | 0.004556  | 0.006172  | 0.006474  | -0.000495 | -0.008097 | -0.004343 | -0.000209 | 0.036212  | -0.001729 | 0.005128  |
| 11 | 0.009216  | 0.002293  | -0.005825 | 0.006718  | 0.007196  | -0.000665 | -0.008559 | -0.004915 | -0.000075 | -0.013516 | -0.001171 | -0.001412 |
| 12 | 0.001258  | 0.003257  | 0.007325  | 0.000314  | 0.011480  | -0.001609 | -0.006047 | -0.004165 | -0.000015 | 0.002130  | 0.001594  | -0.000856 |
| 13 | -0.008311 | 0.006146  | -0.011531 | -0.000404 | 0.005015  | -0.000150 | -0.003074 | -0.001168 | 0.000023  | -0.000477 | 0.000005  | 0.000456  |
| 14 | 0.061260  | -0.025809 | 0.004145  | -0.003609 | -0.009626 | 0.000999  | 0.006960  | 0.005555  | 0.000004  | -0.001312 | -0.000226 | -0.000567 |
| 15 | -0.040076 | 0.074654  | -0.060880 | -0.006509 | -0.009088 | 0.001144  | 0.007329  | 0.007374  | -0.000024 | 0.002735  | 0.001375  | 0.000900  |
| 16 | 0.003984  | 0.009948  | 0.052355  | 0.000843  | 0.000372  | 0.000498  | -0.000925 | -0.000658 | -0.000070 | 0.004556  | -0.005881 | 0.001948  |
| 17 | -0.004727 | 0.005640  | 0.015495  | -0.006893 | -0.010953 | 0.001583  | 0.014760  | 0.001680  | -0.000331 | 0.004394  | 0.001978  | 0.000300  |
| 18 | -0.007338 | -0.016229 | -0.043399 | 0.004065  | 0.004948  | -0.000849 | -0.005915 | -0.002395 | 0.000158  | -0.002127 | 0.005142  | -0.005780 |
| 19 | 0.003766  | 0.006755  | 0.005194  | -0.001751 | -0.000902 | -0.000170 | 0.001307  | 0.001479  | 0.000124  | 0.025443  | -0.009845 | 0.003436  |
| 20 | 0.014841  | 0.016971  | 0.002642  | 0.006672  | 0.006260  | -0.001064 | -0.007132 | -0.004943 | -0.000104 | 0.001572  | 0.004797  | -0.001763 |
| 21 | -0.001860 | -0.005717 | -0.006106 | -0.003089 | -0.002832 | 0.000329  | 0.003585  | 0.002071  | -0.000008 | -0.011158 | 0.001536  | -0.002194 |
| 22 | -0.015169 | 0.002341  | 0.008794  | -0.000350 | -0.000549 | 0.000454  | 0.000070  | 0.000265  | 0.000000  | 0.001194  | -0.000899 | 0.000674  |
| 23 | -0.022455 | -0.014902 | -0.016115 | -0.000329 | 0.009094  | -0.000397 | -0.005902 | -0.002505 | 0.000007  | -0.000492 | 0.001143  | -0.000557 |
| 24 | 0.018364  | 0.001351  | -0.009459 | -0.000584 | -0.004115 | 0.000316  | 0.002711  | 0.001686  | 0.000037  | 0.001121  | -0.000084 | 0.000511  |
| 25 | 0.068441  | -0.064314 | -0.006981 | 0.001655  | 0.001635  | -0.000494 | -0.001001 | -0.001886 | -0.000032 | 0.001008  | 0.000424  | -0.000294 |
| 26 | -0.006657 | -0.045310 | -0.023399 | -0.002379 | -0.005136 | 0.000609  | 0.003228  | 0.003903  | 0.000058  | -0.000205 | -0.000101 | 0.000433  |
| 27 | -0.062995 | 0.077976  | -0.010920 | 0.000863  | 0.001992  | -0.000175 | -0.001096 | -0.001653 | -0.000014 | 0.000546  | 0.000535  | -0.000532 |
| 28 | -0.003732 | -0.016667 | -0.033786 | 0.002194  | 0.003438  | -0.000619 | -0.005049 | -0.000339 | 0.000233  | -0.038769 | 0.009452  | -0.011014 |
| 29 | 0.016002  | 0.022281  | -0.002168 | 0.004530  | 0.007852  | -0.001698 | -0.009314 | -0.001930 | 0.000056  | -0.012705 | -0.004271 | -0.000251 |
| 30 | 0.009760  | 0.010986  | 0.001846  | 0.001024  | 0.000509  | -0.000134 | -0.000873 | -0.000576 | -0.000035 | 0.005524  | 0.004219  | -0.000569 |
| 31 | -0.008201 | 0.001226  | 0.000866  | -0.001079 | 0.002498  | 0.000257  | -0.001627 | -0.000239 | 0.000058  | -0.004208 | -0.002352 | 0.000021  |
| 32 | 0.021757  | 0.008604  | -0.027600 | -0.000485 | -0.002629 | 0.000129  | 0.001286  | 0.001745  | 0.000075  | 0.000533  | 0.002345  | -0.001844 |
| 33 | 0.065417  | 0.010807  | -0.009409 | 0.001317  | -0.005753 | -0.000589 | 0.004471  | 0.000803  | 0.000035  | 0.000579  | -0.001887 | 0.001928  |
| 34 | -0.017922 | 0.060309  | -0.037030 | -0.000441 | -0.000298 | 0.000036  | -0.000206 | 0.000920  | 0.000094  | -0.003320 | -0.002426 | -0.000408 |
| 35 | -0.011092 | 0.001488  | 0.067850  | -0.002318 | -0.003632 | 0.000834  | 0.004238  | 0.001053  | -0.000005 | 0.004221  | 0.001065  | 0.000635  |
| 36 | -0.000319 | 0.001741  | -0.008363 | -0.000215 | -0.000496 | 0.000181  | 0.000437  | 0.000118  | -0.000061 | 0.000238  | 0.000382  | 0.000072  |
| 37 | 0.000410  | -0.000489 | -0.001794 | -0.000120 | -0.000260 | 0.000017  | 0.000249  | 0.000121  | -0.000017 | 0.005344  | -0.002880 | 0.002362  |
| 38 | -0.000079 | -0.000829 | 0.000095  | 0.000241  | 0.000282  | -0.000157 | -0.000176 | -0.000201 | 0.000034  | -0.001606 | 0.002131  | -0.003867 |
| 39 | -0.000312 | -0.000334 | 0.000715  | 0.000277  | 0.000383  | -0.000100 | -0.000297 | -0.000277 | 0.000012  | 0.000206  | 0.000385  | 0.000012  |
| 40 | 0.000504  | -0.000407 | 0.000565  | 0.000139  | 0.000332  | 0.000050  | -0.000371 | -0.000162 | 0.000015  | 0.000052  | 0.000105  | 0.000028  |
| 41 | 0.000083  | -0.000201 | 0.000716  | 0.000201  | 0.000250  | -0.000019 | -0.000310 | -0.000136 | 0.000013  | 0.000036  | 0.000020  | 0.000007  |
| 42 | -0.009911 | 0.001425  | 0.001438  | 0.000246  | 0.000122  | -0.000062 | -0.000154 | -0.000152 | 0.000005  | 0.000025  | 0.000065  | -0.000011 |
| 43 | 0.002699  | -0.012778 | 0.005319  | -0.000037 | -0.000140 | 0.000052  | 0.000097  | 0.000038  | -0.000011 | 0.000033  | 0.000048  | -0.000029 |
| 44 | 0.002355  | 0.004859  | 0.002277  | 0.002145  | 0.003780  | -0.000693 | -0.004614 | -0.000823 | 0.000118  | 0.275141  | -0.005099 | -0.015588 |
| 45 | 0.002900  | 0.003256  | -0.003028 | 0.000274  | 0.001457  | 0.000099  | -0.001336 | -0.000559 | 0.000019  | 0.000175  | -0.000076 | 0.000174  |
| 46 | 0.011445  | 0.000462  | -0.005216 | -0.000378 | -0.002732 | 0.000027  | 0.002120  | 0.001054  | 0.000024  | 0.000227  | 0.000273  | 0.000044  |
| 47 | -0.004034 | 0.009313  | 0.010109  | -0.001056 | -0.001405 | 0.000226  | 0.001407  | 0.000905  | 0.000072  | 0.000094  | 0.000239  | -0.000062 |
| 48 | -0.001122 | -0.000271 | -0.002204 | -0.015460 | -0.021018 | 0.003361  | 0.018511  | 0.004388  | 0.000355  | 0.000466  | 0.000431  | -0.000206 |
| 49 | 0.000264  | -0.000495 | 0.001608  | 0.007221  | 0.013810  | -0.001243 | -0.012202 | -0.004389 | 0.000284  | -0.000151 | -0.000547 | 0.000084  |
| 50 | -0.000901 | -0.000501 | 0.001862  | 0.024770  | 0.023624  | -0.008045 | -0.024219 | 0.001571  | -0.000605 | -0.001394 | -0.000400 | 0.000710  |
| 51 | 0.001300  | 0.001315  | 0.001548  | 0.002326  | 0.003671  | -0.000599 | -0.000927 | -0.000881 | 0.000608  | 0.000588  | 0.001003  | -0.000526 |
| 52 | -0.001075 | -0.002395 | -0.005856 | -0.027262 | -0.034477 | 0.006433  | 0.035093  | 0.008155  | -0.001217 | -0.000466 | -0.000692 | -0.000029 |
| 53 | -0.001085 | -0.000571 | 0.000728  | -0.001977 | -0.004112 | -0.000338 | 0.004192  | 0.002534  | 0.000039  | 0.000021  | 0.000031  | -0.000015 |
| 54 | 0.000281  | 0.000084  | 0.000168  | 0.000032  | 0.000300  | -0.000153 | 0.000143  | -0.000387 | -0.000096 | 0.000041  | 0.000046  | -0.000029 |

|     |           |           |           |           |           |           |           |           |           |           |           |           |
|-----|-----------|-----------|-----------|-----------|-----------|-----------|-----------|-----------|-----------|-----------|-----------|-----------|
| 55  | -0.000078 | -0.000514 | 0.000681  | 0.000811  | 0.001243  | 0.001879  | -0.003152 | -0.000814 | -0.001646 | 0.000108  | -0.000796 | -0.000184 |
| 56  | 0.001222  | -0.000101 | -0.003438 | 0.003964  | 0.005170  | -0.001080 | -0.004962 | -0.002304 | 0.000129  | -0.000924 | -0.000165 | 0.000103  |
| 57  | -0.000033 | 0.000011  | 0.000161  | -0.000562 | -0.000228 | -0.000233 | 0.000792  | 0.000326  | -0.001962 | 0.000000  | -0.000014 | -0.000063 |
| 58  | -0.000259 | -0.000065 | -0.000106 | 0.000467  | -0.000782 | -0.000782 | 0.011147  | -0.002816 | 0.023612  | -0.000006 | 0.000145  | 0.000127  |
| 59  | -0.000094 | -0.000171 | -0.000230 | -0.000518 | -0.000076 | 0.008122  | -0.010980 | 0.003052  | -0.022139 | -0.000073 | 0.000179  | -0.000043 |
| 60  | 0.002742  | -0.001481 | -0.002075 | -0.005130 | -0.002943 | 0.000589  | 0.002371  | 0.005272  | 0.000146  | 0.000148  | 0.000142  | -0.000047 |
| 61  | -0.002941 | 0.022239  | -0.002189 | 0.005758  | -0.003764 | 0.001543  | -0.012654 | 0.009576  | 0.000653  | 0.002049  | -0.000923 | -0.001894 |
| 62  | -0.010089 | -0.016306 | -0.009577 | -0.008307 | 0.003665  | -0.002807 | 0.011253  | -0.003673 | -0.000626 | -0.003295 | -0.001994 | 0.002905  |
| 63  | -0.029207 | 0.012074  | 0.019750  | -0.003143 | 0.008865  | -0.005068 | 0.009839  | -0.010613 | -0.000665 | -0.004704 | -0.000794 | 0.003056  |
| 64  | 0.000245  | -0.000292 | -0.016180 | 0.010077  | -0.003601 | 0.002859  | -0.013840 | 0.004643  | 0.000408  | 0.003111  | -0.001584 | -0.001992 |
| 65  | 0.023025  | -0.013236 | -0.004017 | -0.024725 | -0.058329 | 0.007406  | 0.041928  | 0.033779  | 0.000484  | 0.007299  | 0.002500  | -0.003771 |
| 66  | -0.010731 | 0.009364  | 0.007689  | -0.015770 | 0.023866  | -0.002157 | -0.006814 | -0.000719 | -0.000212 | -0.000901 | 0.003599  | 0.000378  |
| 67  | 0.009781  | -0.020861 | -0.013921 | 0.021973  | 0.053435  | -0.003890 | -0.039203 | -0.032716 | -0.000471 | -0.004543 | -0.000798 | 0.002627  |
| 68  | 0.020728  | 0.006756  | 0.017591  | 0.013806  | -0.024392 | 0.002150  | 0.009691  | 0.000072  | 0.000436  | 0.001330  | -0.000019 | -0.001282 |
| 69  | -0.005137 | 0.002395  | 0.005941  | 0.001011  | 0.000433  | -0.000348 | 0.000320  | -0.001559 | -0.000038 | -0.005995 | 0.000564  | -0.001023 |
| 70  | -0.009585 | -0.008999 | 0.002109  | -0.000490 | -0.002091 | 0.000366  | 0.001426  | 0.000737  | -0.000040 | 0.003596  | 0.000297  | 0.000718  |
| 71  | 0.012887  | -0.005115 | -0.014108 | -0.000803 | 0.000601  | -0.000318 | -0.000152 | 0.000713  | 0.000072  | 0.001329  | -0.000356 | 0.000203  |
| 72  | 0.005744  | 0.010054  | 0.006708  | -0.000125 | 0.000584  | 0.000618  | -0.001104 | 0.000127  | 0.000027  | 0.001358  | -0.000026 | -0.000083 |
| 73  | 0.025943  | -0.015248 | 0.030127  | -0.000887 | 0.000107  | -0.000508 | -0.000349 | 0.001643  | 0.000145  | 0.004306  | -0.006012 | 0.002668  |
| 74  | -0.003961 | -0.000368 | 0.028874  | -0.001326 | -0.001703 | 0.000090  | 0.003063  | -0.000166 | 0.000044  | 0.000837  | 0.000846  | -0.000998 |
| 75  | -0.008628 | -0.011211 | 0.004201  | -0.001435 | -0.002039 | -0.000109 | 0.003828  | -0.000252 | 0.000090  | -0.001152 | 0.005581  | -0.002079 |
| 76  | 0.005384  | -0.005489 | -0.057647 | 0.005323  | 0.007991  | -0.001156 | -0.009643 | -0.002817 | 0.000144  | -0.023573 | 0.000761  | -0.003759 |
| 77  | -0.001558 | -0.000235 | 0.000406  | -0.002531 | -0.001668 | 0.000587  | -0.000123 | 0.003713  | 0.000091  | 0.003016  | -0.007629 | 0.002352  |
| 78  | 0.005213  | 0.006465  | 0.004086  | 0.002872  | 0.002424  | -0.000170 | -0.002886 | -0.002316 | -0.000077 | 0.012155  | 0.000234  | 0.002901  |
| 79  | 0.002447  | 0.003465  | 0.001796  | 0.002291  | 0.001712  | -0.000064 | -0.002352 | -0.001673 | -0.000096 | 0.003657  | -0.000291 | 0.000854  |
| 80  | -0.013117 | -0.016265 | -0.012847 | -0.000444 | 0.001052  | -0.000077 | 0.000416  | -0.000884 | 0.000011  | -0.014663 | 0.001685  | -0.003090 |
| 81  | 0.025587  | 0.022650  | 0.021028  | 0.003237  | 0.003148  | -0.000605 | -0.002800 | -0.003025 | 0.000025  | 0.000648  | -0.000804 | 0.000015  |
| 82  | -0.026091 | -0.008358 | -0.002631 | -0.000477 | 0.002682  | -0.000245 | -0.001329 | -0.000597 | -0.000028 | 0.000501  | 0.000248  | 0.000035  |
| 83  | -0.011007 | -0.008963 | -0.007070 | -0.000288 | 0.003414  | -0.000428 | -0.001756 | -0.000923 | -0.000018 | 0.000643  | 0.000507  | -0.000034 |
| 84  | 0.044831  | 0.026569  | 0.008921  | -0.001729 | -0.007579 | 0.000437  | 0.005858  | 0.003202  | 0.000006  | -0.001296 | -0.000198 | -0.000047 |
| 85  | -0.001982 | -0.017939 | 0.024561  | 0.002151  | -0.000156 | 0.000080  | -0.000778 | -0.001370 | -0.000061 | -0.000770 | -0.000666 | -0.000025 |
| 86  | 0.048225  | -0.001811 | -0.006444 | -0.002038 | -0.002864 | 0.000398  | 0.002122  | 0.002487  | 0.000012  | 0.000644  | 0.000146  | 0.000080  |
| 87  | 0.011832  | 0.035996  | -0.011542 | -0.001510 | -0.002520 | 0.000364  | 0.001651  | 0.002135  | 0.000020  | 0.000403  | 0.000164  | 0.000025  |
| 88  | -0.072066 | 0.058618  | -0.017121 | -0.003557 | -0.003120 | 0.000094  | 0.004418  | 0.002135  | -0.000084 | 0.000098  | 0.000936  | -0.000074 |
| 89  | -0.001628 | -0.010468 | -0.016601 | 0.000479  | 0.000713  | -0.000348 | -0.000418 | -0.000490 | 0.000052  | -0.008345 | -0.013291 | 0.004627  |
| 90  | -0.009783 | -0.002546 | 0.003736  | -0.000200 | -0.000606 | 0.000170  | 0.000296  | 0.000339  | -0.000002 | -0.001455 | -0.000257 | -0.000109 |
| 91  | 0.036712  | 0.009512  | 0.002528  | -0.000188 | -0.000101 | -0.000224 | 0.000320  | 0.000198  | 0.000017  | -0.000029 | -0.000235 | 0.000075  |
| 92  | 0.002581  | 0.029051  | -0.013328 | -0.000016 | -0.000013 | 0.000232  | -0.000279 | 0.000092  | 0.000004  | -0.001426 | -0.001211 | 0.000231  |
| 93  | 0.001306  | -0.001813 | -0.007535 | 0.000649  | 0.000886  | -0.000017 | -0.001672 | 0.000176  | 0.000002  | -0.000524 | -0.000627 | 0.000461  |
| 94  | 0.002640  | 0.002182  | -0.021214 | 0.000676  | 0.000816  | -0.000074 | -0.001390 | -0.000010 | -0.000046 | -0.000309 | -0.000210 | 0.000535  |
| 95  | 0.004670  | 0.005869  | -0.003732 | 0.000317  | 0.000584  | 0.000139  | -0.001453 | 0.000427  | -0.000072 | -0.001979 | -0.003469 | 0.000600  |
| 96  | 0.003678  | 0.004851  | -0.000561 | 0.001059  | 0.001391  | -0.000029 | -0.002295 | -0.000132 | -0.000017 | 0.003135  | -0.002068 | 0.001461  |
| 97  | -0.003185 | -0.003681 | -0.001205 | -0.001505 | -0.001246 | 0.000073  | 0.001501  | 0.001213  | 0.000058  | 0.001260  | 0.001588  | -0.002494 |
| 98  | -0.001968 | -0.002838 | -0.002957 | -0.001355 | -0.001163 | 0.000099  | 0.001369  | 0.001091  | 0.000018  | -0.013416 | -0.001811 | -0.000422 |
| 99  | -0.000581 | -0.000727 | -0.000750 | -0.001016 | -0.000770 | 0.000005  | 0.001068  | 0.000755  | 0.000053  | -0.001789 | 0.000406  | -0.000364 |
| 100 | -0.001977 | -0.002592 | -0.000839 | -0.001302 | -0.000967 | 0.000054  | 0.001318  | 0.000945  | 0.000044  | -0.001880 | -0.000166 | -0.000449 |
| 101 | 0.012418  | 0.004174  | 0.001946  | 0.000372  | -0.001355 | 0.000131  | 0.000609  | 0.000220  | 0.000006  | -0.000205 | -0.000139 | -0.000047 |
| 102 | 0.012896  | 0.003881  | 0.000570  | 0.000107  | -0.001340 | 0.000118  | 0.000724  | 0.000381  | 0.000020  | -0.000298 | -0.000129 | 0.000018  |
| 103 | 0.005761  | 0.004742  | 0.002939  | 0.000193  | -0.001448 | 0.000194  | 0.000705  | 0.000345  | 0.000004  | -0.000333 | -0.000263 | 0.000008  |
| 104 | 0.005403  | 0.004239  | 0.004103  | 0.000090  | -0.001976 | 0.000235  | 0.001059  | 0.000585  | 0.000014  | -0.000310 | -0.000240 | 0.000024  |

|     |           |           |           |           |           |           |           |           |           |           |           |           |
|-----|-----------|-----------|-----------|-----------|-----------|-----------|-----------|-----------|-----------|-----------|-----------|-----------|
| 105 | -0.021068 | 0.000262  | 0.003587  | 0.001035  | 0.001437  | -0.000207 | -0.001047 | -0.001273 | -0.000008 | -0.000325 | -0.000067 | -0.000030 |
| 106 | -0.026631 | 0.001590  | 0.003015  | 0.000983  | 0.001397  | -0.000184 | -0.001050 | -0.001194 | -0.000003 | -0.000315 | -0.000082 | -0.000047 |
| 107 | -0.002271 | -0.024677 | 0.007144  | 0.000939  | 0.001434  | -0.000246 | -0.000984 | -0.001204 | -0.000007 | -0.000208 | -0.000122 | -0.000024 |
| 108 | -0.009527 | -0.010383 | 0.004392  | 0.000586  | 0.001129  | -0.000130 | -0.000696 | -0.000949 | -0.000013 | -0.000207 | -0.000059 | 0.000004  |
| 109 | -0.000318 | 0.006421  | 0.011607  | -0.000426 | -0.000283 | 0.000364  | -0.000412 | 0.000778  | 0.000069  | -0.005377 | 0.010949  | -0.009738 |
| 110 | 0.002149  | 0.003889  | 0.004323  | 0.000001  | -0.000334 | -0.000036 | 0.000731  | -0.000321 | -0.000121 | 0.013741  | 0.002413  | 0.005240  |
| 111 | 0.004258  | 0.001619  | -0.001718 | -0.000284 | -0.000587 | 0.000049  | 0.000367  | 0.000480  | -0.000007 | 0.000973  | 0.000845  | -0.000252 |
| 112 | 0.005358  | 0.001138  | -0.002306 | 0.000425  | 0.001103  | -0.000227 | -0.000559 | -0.000763 | 0.000007  | 0.000437  | -0.000662 | 0.000387  |
| 113 | -0.042171 | 0.003222  | 0.001507  | -0.000222 | -0.000234 | 0.000403  | -0.000310 | 0.000362  | -0.000019 | 0.000380  | 0.000784  | -0.000182 |
| 114 | 0.005474  | -0.012149 | -0.003856 | 0.000391  | 0.000287  | -0.000179 | 0.000035  | -0.000536 | 0.000005  | -0.000345 | -0.000534 | 0.000109  |
| 115 | -0.007461 | 0.013954  | -0.033301 | -0.000813 | -0.000712 | 0.000144  | 0.000614  | 0.000769  | -0.000014 | 0.000949  | 0.001310  | -0.000244 |
| 116 | 0.005786  | -0.042938 | 0.046509  | 0.000842  | 0.000769  | -0.000388 | -0.000362 | -0.000878 | 0.000003  | 0.000449  | -0.000178 | 0.000022  |
| 117 | 0.004249  | 0.003006  | 0.002434  | 0.043959  | 0.066533  | -0.005940 | -0.071322 | -0.028258 | 0.001013  | -0.002036 | -0.001853 | 0.001061  |
| 118 | -0.000297 | 0.000359  | 0.002044  | 0.028039  | 0.026800  | -0.007606 | -0.028817 | -0.004856 | -0.000324 | -0.001185 | -0.000768 | 0.000639  |
| 119 | -0.000132 | 0.000810  | 0.002445  | 0.024176  | 0.031338  | -0.007843 | -0.031116 | -0.004703 | -0.000379 | -0.000974 | -0.000575 | 0.000595  |
| 120 | -0.000450 | -0.000228 | -0.000796 | 0.004320  | 0.003513  | -0.001614 | -0.004231 | -0.000993 | -0.000534 | -0.000441 | -0.000482 | 0.000170  |
| 121 | 0.000235  | 0.000095  | 0.000480  | -0.002331 | -0.002265 | 0.001041  | 0.002005  | 0.000301  | 0.000249  | 0.000243  | 0.000255  | -0.000084 |
| 122 | 0.000213  | 0.000127  | 0.000334  | -0.002041 | -0.003525 | 0.001064  | 0.003835  | 0.001102  | 0.000275  | 0.000196  | 0.000225  | -0.000082 |
| 123 | -0.000026 | 0.000653  | -0.000814 | 0.003183  | 0.001456  | -0.002282 | -0.002211 | 0.000839  | -0.000340 | -0.000647 | -0.000162 | 0.000292  |
| 124 | -0.000482 | -0.001100 | 0.000279  | -0.001878 | 0.000519  | 0.002116  | -0.000533 | 0.000969  | -0.000155 | 0.000034  | -0.000140 | 0.000074  |
| 125 | 0.000512  | 0.000460  | 0.000501  | -0.000420 | 0.000591  | 0.000768  | -0.001533 | -0.001776 | 0.000648  | 0.000619  | 0.000306  | -0.000375 |
| 126 | 0.000732  | 0.002446  | 0.002444  | 0.024795  | 0.026937  | -0.007971 | -0.026802 | -0.004715 | -0.000562 | -0.000753 | 0.000003  | 0.000329  |
| 127 | 0.000049  | -0.000230 | 0.000147  | 0.018230  | 0.018172  | -0.006522 | -0.017582 | 0.001327  | -0.000642 | -0.001510 | -0.000432 | 0.000597  |
| 128 | 0.000171  | 0.000276  | 0.000161  | 0.000231  | 0.001376  | -0.000619 | -0.000083 | -0.000561 | -0.002673 | 0.000102  | -0.000160 | -0.000104 |
| 129 | -0.000257 | -0.000406 | 0.000294  | -0.001571 | -0.001419 | -0.016914 | 0.027651  | -0.007471 | 0.030277  | -0.000007 | 0.000107  | 0.000027  |
| 130 | -0.000272 | -0.000230 | -0.000041 | 0.001394  | 0.000508  | 0.017751  | -0.028089 | 0.007610  | -0.027133 | 0.000012  | 0.000118  | -0.000040 |
| 131 | 0.000037  | 0.000099  | 0.000149  | -0.002109 | -0.005688 | 0.001390  | 0.007314  | -0.000583 | 0.005073  | -0.000026 | -0.000052 | 0.000193  |
| 132 | 0.000135  | 0.000140  | -0.000607 | 0.002236  | 0.005684  | -0.001652 | -0.007191 | 0.000705  | -0.007043 | -0.000128 | 0.000043  | -0.000143 |
| 133 | 0.000196  | 0.000134  | 0.000034  | -0.000182 | -0.000455 | -0.000009 | 0.000480  | 0.000278  | 0.001471  | 0.000045  | -0.000060 | 0.000067  |
| 134 | -0.018387 | -0.027898 | 0.016575  | -0.001774 | -0.002410 | -0.001014 | 0.004835  | 0.000277  | 0.000102  | 0.000610  | 0.005093  | -0.001133 |
| 135 | -0.015824 | -0.057848 | -0.069567 | 0.003480  | 0.005214  | -0.000919 | -0.005543 | -0.002423 | 0.000056  | 0.002173  | 0.003189  | 0.000008  |
| 136 | -0.006219 | 0.000422  | 0.053065  | -0.000192 | 0.000001  | -0.000146 | 0.000558  | -0.000302 | -0.000050 | 0.001764  | 0.003440  | -0.000761 |
| 137 | -0.009998 | -0.017538 | -0.003360 | -0.002107 | -0.002275 | 0.000014  | 0.002848  | 0.001557  | 0.000014  | 0.000150  | 0.001523  | -0.000652 |
| 138 | 0.009634  | -0.016621 | -0.072278 | 0.001266  | 0.002602  | -0.001115 | -0.002419 | -0.000173 | 0.000181  | -0.002714 | 0.001221  | 0.003163  |
| 139 | 0.007382  | -0.006282 | -0.017223 | 0.006155  | 0.009294  | -0.000147 | -0.010170 | -0.005477 | -0.000037 | 0.002475  | 0.005078  | -0.003167 |
| 140 | 0.002553  | -0.005985 | -0.014401 | 0.001071  | 0.001436  | 0.000020  | -0.000992 | -0.001495 | -0.000043 | 0.002283  | -0.000133 | -0.000540 |
| 141 | 0.007073  | -0.006473 | -0.008990 | 0.001253  | 0.001762  | 0.000262  | -0.001929 | -0.001441 | -0.000038 | -0.000220 | 0.001226  | -0.001716 |
| 142 | 0.005818  | -0.007656 | -0.010845 | 0.001445  | 0.001371  | 0.000226  | -0.001774 | -0.001409 | -0.000027 | 0.000636  | 0.002657  | -0.002157 |
| 143 | 0.004152  | -0.000634 | 0.012708  | 0.002127  | 0.001619  | 0.000071  | -0.002430 | -0.001546 | -0.000057 | 0.003163  | 0.002704  | -0.001104 |
| 144 | 0.053864  | 0.027359  | 0.008786  | 0.002564  | 0.005710  | -0.001212 | -0.003935 | -0.002917 | 0.000198  | 0.000767  | 0.001494  | -0.000596 |
| 145 | 0.019350  | -0.008168 | -0.001167 | -0.001330 | -0.002235 | -0.000274 | 0.002422  | 0.001472  | 0.000039  | 0.000890  | 0.002368  | -0.000916 |
| 146 | 0.021035  | 0.008196  | 0.003152  | -0.000052 | 0.000396  | -0.000106 | -0.000117 | -0.000120 | 0.000045  | 0.000060  | 0.000569  | -0.000196 |
| 147 | -0.024481 | -0.002684 | 0.004485  | 0.000804  | 0.001580  | -0.000134 | -0.001269 | -0.001024 | 0.000001  | 0.000079  | -0.000744 | 0.000218  |
| 148 | 0.053028  | 0.023198  | 0.008737  | -0.000146 | 0.000229  | -0.000750 | 0.000496  | 0.000034  | 0.000013  | 0.000102  | 0.000217  | 0.000154  |
| 149 | 0.015692  | -0.008099 | 0.030626  | -0.005207 | -0.010018 | 0.001420  | 0.007913  | 0.006209  | 0.000216  | 0.000000  | 0.001164  | 0.000208  |
| 150 | -0.076624 | 0.075576  | 0.017676  | -0.002930 | -0.003012 | 0.000457  | 0.002764  | 0.002776  | 0.000081  | 0.000234  | -0.000275 | 0.000302  |
| 151 | 0.051844  | 0.004081  | 0.015650  | -0.002023 | -0.002980 | 0.000668  | 0.002413  | 0.001969  | 0.000044  | 0.000424  | -0.000334 | 0.000268  |
| 152 | -0.001810 | -0.050890 | 0.000286  | -0.000887 | -0.002370 | 0.000651  | 0.001620  | 0.001026  | 0.000033  | 0.000695  | 0.000907  | -0.000306 |
| 153 | -0.072432 | 0.074421  | 0.063380  | 0.000140  | -0.001395 | 0.000357  | 0.000361  | 0.000586  | 0.000096  | 0.000959  | 0.001818  | -0.000229 |
| 154 | 0.010109  | -0.007751 | -0.033239 | 0.002654  | 0.004719  | -0.000979 | -0.004902 | -0.001616 | 0.000034  | 0.001055  | 0.003658  | 0.006335  |

|     |           |           |           |           |           |           |           |           |           |           |           |           |
|-----|-----------|-----------|-----------|-----------|-----------|-----------|-----------|-----------|-----------|-----------|-----------|-----------|
| 155 | 0.004608  | -0.006087 | 0.008305  | 0.001684  | 0.002533  | 0.000209  | -0.002954 | -0.001569 | 0.000063  | 0.001245  | 0.002102  | -0.000746 |
| 156 | 0.000643  | 0.036219  | 0.011066  | -0.001165 | -0.002987 | 0.000000  | 0.002755  | 0.001471  | 0.000153  | 0.000433  | 0.000949  | 0.000081  |
| 157 | -0.030146 | -0.001748 | 0.003756  | -0.000429 | -0.001484 | 0.000412  | 0.000914  | 0.000580  | 0.000201  | 0.000885  | 0.002607  | -0.000291 |
| 158 | -0.000789 | -0.000397 | 0.000303  | -0.012366 | -0.331701 | 0.127672  | 0.255149  | -0.002768 | -0.002770 | -0.000553 | 0.000024  | 0.000371  |
| 159 | 0.000686  | 0.001656  | -0.004910 | 0.014557  | 0.637993  | -0.137580 | -0.450931 | -0.114649 | 0.002705  | 0.000770  | 0.000623  | -0.001258 |
| 160 | 0.000571  | 0.001861  | -0.004596 | 0.117993  | 0.342365  | 0.080364  | -0.570460 | 0.004214  | 0.020432  | 0.000801  | 0.000535  | -0.001212 |
| 161 | 0.000408  | -0.000309 | 0.000682  | -0.008189 | -0.241019 | -0.086320 | 0.350035  | 0.008190  | 0.002122  | 0.000361  | 0.000009  | -0.000407 |
| 162 | -0.002628 | 0.001412  | -0.000774 | 0.000088  | -0.000766 | 0.000172  | 0.000517  | 0.000054  | 0.000000  | 0.000111  | -0.000025 | -0.000023 |
| 163 | 0.006618  | 0.006103  | -0.002514 | 0.002698  | -0.006949 | 0.002940  | -0.007581 | 0.009067  | 0.000570  | 0.002852  | -0.000002 | -0.002154 |
| 164 | -0.007341 | -0.000423 | 0.078643  | 0.001136  | 0.001766  | -0.000739 | -0.000754 | -0.001609 | 0.000119  | 0.000563  | 0.004642  | -0.002123 |
| 165 | -0.006803 | -0.010828 | -0.030906 | -0.000343 | -0.000328 | 0.000191  | 0.000035  | 0.000421  | -0.000059 | -0.002203 | -0.000935 | -0.000317 |
| 166 | 0.004782  | 0.001156  | -0.003123 | 0.001959  | 0.001804  | 0.000410  | -0.002724 | -0.001498 | -0.000114 | 0.005194  | -0.000427 | 0.000199  |
| 167 | 0.009268  | -0.008788 | -0.011989 | 0.000903  | 0.001649  | 0.000730  | -0.001891 | -0.001494 | -0.000058 | -0.001460 | 0.000011  | 0.000461  |
| 168 | -0.001577 | -0.002504 | -0.006009 | -0.000140 | -0.000188 | -0.000007 | 0.000315  | 0.000039  | 0.000016  | 0.000619  | 0.000958  | -0.001284 |
| 169 | -0.006395 | 0.010910  | 0.007166  | -0.001150 | -0.001036 | -0.000752 | 0.001928  | 0.001216  | 0.000028  | -0.000302 | -0.003713 | 0.002250  |
| 170 | -0.009389 | -0.011417 | -0.008635 | 0.000559  | -0.000430 | 0.000130  | -0.000318 | 0.000089  | -0.000127 | -0.000225 | -0.002498 | 0.000771  |
| 171 | -0.043704 | -0.020798 | -0.005632 | -0.000220 | -0.000875 | 0.000356  | 0.000323  | 0.000410  | -0.000055 | -0.000036 | -0.000971 | 0.000260  |
| 172 | 0.009698  | -0.008220 | -0.008036 | -0.001064 | -0.002755 | 0.000511  | 0.001846  | 0.001515  | -0.000063 | -0.000186 | 0.000097  | -0.000147 |
| 173 | 0.075146  | 0.003081  | -0.000277 | -0.003095 | -0.004258 | 0.001125  | 0.003596  | 0.002701  | 0.000072  | 0.000480  | -0.000366 | 0.000448  |
| 174 | -0.028752 | -0.031751 | -0.010139 | -0.000001 | 0.000172  | -0.000060 | -0.000024 | -0.000099 | -0.000018 | 0.000003  | -0.000009 | -0.000150 |
| 175 | -0.004962 | 0.077357  | -0.000939 | 0.000670  | 0.002839  | -0.000952 | -0.001763 | -0.000837 | -0.000043 | -0.001127 | -0.001455 | 0.000388  |
| 176 | 0.006801  | -0.021030 | -0.039543 | -0.004632 | -0.006032 | 0.000809  | 0.006751  | 0.003374  | 0.000095  | 0.014181  | -0.010506 | 0.003385  |
| 177 | -0.003229 | -0.012664 | -0.017177 | 0.002446  | 0.002199  | -0.000693 | -0.002386 | -0.001742 | -0.000058 | -0.014302 | 0.009404  | -0.000191 |
| 178 | -0.011192 | -0.002516 | 0.010742  | 0.000109  | -0.001879 | -0.000091 | 0.001225  | 0.000588  | 0.000055  | 0.001182  | 0.003226  | -0.001016 |
| 179 | -0.009142 | 0.010195  | -0.005477 | 0.002751  | 0.006053  | -0.000295 | -0.005749 | -0.002884 | -0.000073 | 0.001093  | -0.001825 | 0.000468  |
| 180 | -0.064141 | -0.018600 | -0.009304 | 0.000542  | 0.004045  | -0.000176 | -0.002616 | -0.001848 | -0.000130 | -0.000175 | -0.003058 | 0.000675  |
| 181 | 0.324805  | -0.044336 | -0.020738 | 0.001737  | 0.000478  | -0.000280 | -0.000850 | -0.001094 | 0.000059  | 0.001125  | 0.002861  | -0.001010 |
| 182 | -0.044336 | 0.320266  | -0.064656 | 0.001776  | 0.001682  | -0.000003 | -0.002184 | -0.001343 | -0.000081 | -0.000251 | 0.001408  | -0.001245 |
| 183 | -0.020738 | -0.064656 | 0.311235  | -0.004777 | -0.006180 | 0.000668  | 0.005691  | 0.004829  | 0.000174  | -0.002401 | -0.001410 | -0.000150 |
| 184 | 0.001737  | 0.001776  | -0.004777 | 0.208834  | 0.030595  | 0.043898  | -0.159301 | -0.063232 | -0.000825 | 0.000324  | 0.000774  | -0.001025 |
| 185 | 0.000478  | 0.001682  | -0.006180 | 0.030595  | 1.458493  | -0.205420 | -0.735477 | -0.144156 | -0.003737 | 0.001080  | 0.000753  | -0.001494 |
| 186 | -0.000280 | -0.000003 | 0.000668  | 0.043898  | -0.205420 | 0.285777  | -0.111114 | 0.056519  | -0.013623 | -0.000090 | -0.000153 | 0.000361  |
| 187 | -0.000850 | -0.002184 | 0.005691  | -0.159301 | -0.735477 | -0.111114 | 1.503890  | 0.010953  | 0.015827  | -0.001690 | -0.000565 | 0.001601  |
| 188 | -0.001094 | -0.001343 | 0.004829  | -0.063232 | -0.144156 | 0.056519  | 0.010953  | 0.202387  | 0.001935  | 0.000279  | -0.000839 | 0.000634  |
| 189 | 0.000059  | -0.000081 | 0.000174  | -0.000825 | -0.003737 | -0.013623 | 0.015827  | 0.001935  | 0.107377  | 0.000036  | -0.000003 | -0.000105 |
| 190 | 0.001125  | -0.000251 | -0.002401 | 0.000324  | 0.001080  | -0.000090 | -0.001690 | 0.000279  | 0.000036  | 5.534620  | 0.203846  | 0.055692  |
| 191 | 0.002861  | 0.001408  | -0.001410 | 0.000774  | 0.000753  | -0.000153 | -0.000565 | -0.000839 | -0.000003 | 0.203846  | 5.769690  | 0.202440  |
| 192 | -0.001010 | -0.001245 | -0.000150 | -0.001025 | -0.001494 | 0.000361  | 0.001601  | 0.000634  | -0.000105 | 0.055692  | 0.202440  | 5.779600  |
| 193 | -0.000265 | -0.000195 | 0.000618  | -0.000512 | -0.000689 | 0.000149  | 0.000696  | 0.000377  | 0.000023  | 1.190200  | 0.079749  | 0.221155  |
| 194 | -0.000226 | -0.000373 | -0.000486 | -0.000239 | -0.000330 | 0.000017  | 0.000417  | 0.000146  | 0.000053  | 0.087974  | 1.210020  | 0.087161  |
| 195 | -0.001638 | 0.000220  | 0.000824  | -0.001381 | -0.001561 | 0.000266  | 0.001577  | 0.001163  | -0.000058 | 0.243910  | 0.086778  | 1.190270  |
| 196 | 0.000034  | 0.000022  | 0.000282  | -0.000445 | -0.000549 | 0.000091  | 0.000480  | 0.000434  | 0.000012  | 0.082957  | 0.087309  | -0.005970 |
| 197 | -0.000042 | -0.000063 | 0.000159  | 0.000262  | 0.000257  | -0.000075 | -0.000199 | -0.000251 | 0.000019  | -0.010490 | 0.089429  | 0.091566  |
| 198 | -0.000027 | -0.000077 | 0.000051  | -0.000145 | -0.000204 | 0.000065  | 0.000207  | 0.000089  | -0.000010 | -0.004713 | -0.006899 | 0.089660  |
| 199 | -0.000189 | -0.000080 | 0.000238  | -0.000182 | -0.000251 | 0.000067  | 0.000238  | 0.000139  | -0.000014 | -0.004755 | -0.005440 | -0.006948 |
| 200 | -0.000072 | -0.000364 | -0.000191 | -0.000500 | -0.000617 | 0.000107  | 0.000627  | 0.000403  | -0.000030 | -0.007603 | -0.005386 | -0.001734 |
| 201 | -0.000112 | 0.001141  | -0.000990 | -0.000295 | -0.000276 | 0.000050  | 0.000165  | 0.000358  | 0.000019  | 0.000451  | 0.000028  | 0.000075  |
| 202 | 0.000613  | 0.000503  | -0.000240 | 0.000297  | 0.000107  | -0.000035 | -0.000133 | -0.000245 | 0.000004  | 0.000120  | 0.000262  | 0.000091  |
| 203 | -0.000501 | 0.000150  | 0.000008  | -0.000340 | -0.000568 | -0.000018 | 0.000570  | 0.000366  | 0.000003  | 0.000040  | 0.000157  | -0.000034 |
| 204 | 0.000420  | 0.000526  | -0.000221 | -0.000241 | -0.000570 | -0.000041 | 0.000473  | 0.000400  | 0.000010  | 0.000045  | -0.000046 | 0.000025  |



|     |           |           |           |           |           |           |           |           |           |           |           |           |
|-----|-----------|-----------|-----------|-----------|-----------|-----------|-----------|-----------|-----------|-----------|-----------|-----------|
| 205 | -0.001469 | -0.002266 | 0.002043  | 0.001311  | 0.001344  | -0.000238 | -0.001272 | -0.001165 | 0.000013  | 0.000256  | 0.000136  | 0.000059  |
| 206 | 0.000263  | -0.000713 | 0.000162  | 0.000355  | 0.001045  | -0.000169 | -0.000812 | -0.000459 | -0.000003 | 0.000107  | 0.000199  | 0.000040  |
| 207 | 0.000051  | -0.000047 | -0.000072 | -0.000113 | -0.000168 | 0.000034  | 0.000103  | 0.000148  | 0.000015  | 0.000105  | -0.000008 | 0.000030  |
| 208 | -0.000019 | 0.000068  | -0.000014 | -0.000119 | -0.000165 | 0.000007  | 0.000144  | 0.000139  | 0.000011  | 0.000081  | 0.000090  | 0.000051  |
| 209 | -0.000004 | -0.000048 | 0.000019  | 0.000010  | -0.000071 | -0.000024 | 0.000057  | 0.000033  | 0.000004  | 0.000036  | 0.000087  | 0.000019  |
| 210 | -0.000099 | -0.000114 | 0.000041  | 0.000255  | 0.000218  | -0.000026 | -0.000212 | -0.000241 | 0.000005  | 0.000025  | 0.000093  | 0.000021  |
| 211 | -0.000587 | -0.000576 | 0.000240  | -0.000289 | -0.000368 | -0.000160 | 0.000536  | 0.000289  | -0.000007 | -0.000018 | -0.000053 | -0.000011 |
| 212 | 0.013602  | -0.001938 | -0.000977 | 0.000110  | 0.000384  | 0.000018  | -0.000385 | -0.000143 | 0.000022  | 0.000305  | 0.000312  | -0.000183 |
| 213 | -0.003776 | -0.001365 | 0.000976  | 0.000113  | 0.000289  | -0.000035 | -0.000207 | -0.000167 | -0.000014 | 0.000152  | -0.000230 | -0.000073 |
| 214 | -0.002670 | -0.000826 | -0.000332 | 0.000022  | 0.000245  | 0.000013  | -0.000195 | -0.000092 | -0.000002 | -0.000129 | -0.000227 | 0.000135  |
| 215 | 0.001919  | 0.002107  | 0.000431  | -0.000039 | 0.000665  | 0.000058  | -0.000561 | -0.000141 | 0.000021  | 0.000017  | 0.000366  | -0.000036 |
| 216 | -0.000378 | -0.000201 | -0.000944 | -0.000098 | 0.000117  | 0.000019  | -0.000113 | 0.000080  | 0.000023  | 0.000217  | 0.000497  | -0.000023 |
| 217 | -0.017934 | 0.002003  | 0.000702  | -0.000323 | -0.001349 | 0.000052  | 0.001059  | 0.000610  | 0.000004  | -0.000051 | -0.000166 | 0.000086  |
| 218 | 0.001008  | 0.000336  | -0.000089 | 0.000041  | 0.000190  | -0.000002 | -0.000181 | -0.000055 | 0.000009  | -0.000009 | 0.000000  | -0.000014 |
| 219 | 0.001360  | -0.000120 | -0.000073 | -0.000023 | 0.000038  | 0.000034  | -0.000054 | 0.000004  | 0.000009  | 0.000047  | 0.000121  | 0.000001  |
| 220 | -0.000405 | -0.000090 | 0.000005  | 0.000018  | 0.000132  | 0.000007  | -0.000102 | -0.000057 | 0.000009  | 0.000041  | 0.000079  | 0.000012  |
| 221 | -0.000602 | 0.000125  | -0.000082 | -0.000073 | -0.000040 | 0.000016  | 0.000025  | 0.000077  | 0.000002  | 0.000018  | 0.000099  | 0.000019  |
| 222 | -0.000172 | 0.000047  | -0.000581 | 0.000184  | 0.000331  | -0.000030 | -0.000356 | -0.000141 | -0.000001 | -0.000037 | 0.000000  | 0.000024  |
| 223 | -0.001954 | 0.013432  | -0.012180 | -0.000664 | -0.001084 | 0.000136  | 0.001149  | 0.000507  | -0.000031 | 0.000228  | 0.000065  | -0.000043 |
| 224 | 0.000906  | 0.002205  | -0.001541 | -0.000711 | -0.000920 | 0.000266  | 0.000730  | 0.000668  | -0.000041 | 0.000130  | 0.000438  | -0.000026 |
| 225 | -0.000622 | -0.002759 | -0.000770 | 0.000464  | 0.000413  | -0.000096 | -0.000427 | -0.000377 | -0.000062 | -0.000083 | 0.000116  | 0.000073  |
| 226 | 0.001790  | 0.000749  | -0.003584 | 0.000366  | 0.000329  | -0.000004 | -0.000292 | -0.000408 | -0.000049 | 0.000105  | 0.000049  | 0.000008  |
| 227 | -0.000092 | 0.002101  | -0.001797 | 0.000185  | 0.000268  | 0.000035  | -0.000336 | -0.000150 | -0.000011 | 0.000166  | 0.000118  | 0.000006  |
| 228 | 0.001282  | -0.020548 | 0.019852  | 0.000130  | -0.000001 | -0.000032 | -0.000028 | -0.000080 | -0.000028 | 0.000354  | 0.000247  | -0.000032 |
| 229 | -0.000011 | 0.000330  | -0.000437 | -0.000199 | -0.000508 | 0.000178  | 0.000535  | 0.000011  | -0.000060 | 0.000001  | 0.000015  | -0.000017 |
| 230 | -0.000220 | 0.000493  | -0.000347 | -0.000435 | -0.000451 | 0.000134  | 0.000340  | 0.000428  | 0.000001  | 0.000045  | 0.000110  | -0.000008 |
| 231 | 0.000030  | -0.000436 | 0.000217  | 0.000129  | 0.000142  | -0.000024 | -0.000159 | -0.000092 | -0.000025 | 0.000019  | 0.000082  | 0.000004  |
| 232 | 0.000025  | -0.001154 | 0.001184  | 0.000142  | 0.000142  | -0.000030 | -0.000146 | -0.000115 | 0.000014  | 0.000018  | 0.000132  | -0.000005 |
| 233 | 0.000008  | -0.000037 | -0.001701 | 0.000289  | 0.000210  | -0.000085 | -0.000141 | -0.000283 | -0.000008 | 0.000018  | -0.000006 | -0.000015 |
| 234 | -0.002339 | 0.001843  | 0.002121  | -0.001093 | -0.001525 | 0.000109  | 0.001868  | 0.000715  | 0.000189  | 0.237325  | 0.130497  | -0.565701 |
| 235 | 0.004222  | 0.001275  | -0.002767 | 0.004898  | 0.007038  | -0.001444 | -0.007747 | -0.003073 | 0.000157  | 0.552858  | 0.149612  | -0.589303 |
| 236 | 0.000598  | -0.000272 | -0.001505 | -0.000907 | -0.000793 | 0.000408  | 0.000361  | 0.000947  | -0.000185 | 0.508557  | 0.308578  | 0.154994  |
| 237 | 0.000252  | -0.000919 | -0.000225 | -0.001657 | -0.002796 | 0.000628  | 0.003321  | 0.000653  | -0.000220 | 0.267412  | 0.537413  | 0.156643  |
| 238 | -0.000347 | -0.000310 | 0.000421  | 0.000717  | 0.000892  | -0.000267 | -0.000874 | -0.000511 | 0.000115  | 0.147065  | 0.515061  | 0.298643  |
| 239 | -0.000331 | -0.000345 | 0.000368  | 0.000139  | 0.000236  | -0.000062 | -0.000312 | -0.000019 | 0.000056  | 0.146482  | 0.284990  | 0.526535  |
| 240 | 0.000539  | 0.000688  | 0.000037  | 0.000383  | 0.000412  | -0.000100 | -0.000334 | -0.000371 | 0.000016  | -0.551748 | 0.150408  | 0.518903  |
| 241 | 0.000649  | 0.000729  | 0.000041  | 0.000576  | 0.000683  | -0.000182 | -0.000608 | -0.000493 | 0.000046  | -0.515545 | 0.149208  | 0.290053  |
| 242 | -0.000312 | -0.000367 | 0.000083  | -0.000362 | -0.000547 | 0.000151  | 0.000578  | 0.000210  | -0.000063 | -0.513204 | -0.574805 | 0.154816  |
| 243 | -0.000305 | -0.000383 | -0.000067 | -0.000283 | -0.000448 | 0.000123  | 0.000490  | 0.000145  | -0.000061 | -0.550068 | -0.538880 | 0.151909  |
| 244 | -0.001757 | -0.001235 | 0.001425  | -0.001029 | -0.001366 | 0.000261  | 0.001432  | 0.000757  | -0.000011 | 0.132758  | -0.538159 | -0.566023 |
| 245 | -0.000870 | -0.000704 | 0.000070  | -0.001379 | -0.001777 | 0.000374  | 0.001811  | 0.001038  | -0.000038 | 0.138075  | -0.573886 | -0.531405 |
| 246 | 0.000722  | -0.001889 | 0.001318  | 0.002514  | 0.005304  | -0.000154 | -0.004728 | -0.003072 | -0.000009 | 0.000378  | 0.000095  | 0.000218  |
| 247 | -0.000639 | 0.000809  | -0.000902 | -0.000274 | -0.001200 | 0.000027  | 0.001095  | 0.000365  | 0.000002  | 0.000323  | 0.000497  | 0.000108  |
| 248 | 0.000290  | 0.000883  | -0.000867 | -0.001005 | -0.001542 | 0.000104  | 0.001417  | 0.001061  | 0.000004  | -0.000262 | -0.000170 | -0.000126 |
| 249 | 0.000417  | 0.001442  | -0.001033 | -0.000904 | -0.001341 | 0.000122  | 0.001223  | 0.000926  | -0.000001 | -0.000231 | -0.000031 | -0.000113 |
| 250 | -0.000095 | 0.000127  | -0.000017 | -0.000097 | -0.000203 | 0.000009  | 0.000148  | 0.000154  | -0.000009 | 0.000070  | -0.000035 | 0.000043  |
| 251 | -0.000056 | 0.000052  | 0.000128  | -0.000188 | -0.000279 | 0.000014  | 0.000225  | 0.000241  | 0.000008  | 0.000023  | -0.000108 | 0.000006  |
| 252 | -0.000011 | -0.000530 | 0.000475  | 0.000499  | 0.000574  | -0.000050 | -0.000530 | -0.000506 | 0.000001  | 0.000061  | 0.000105  | 0.000033  |
| 253 | 0.000008  | -0.000472 | 0.000407  | 0.000491  | 0.000465  | -0.000052 | -0.000456 | -0.000456 | 0.000004  | 0.000062  | 0.000101  | 0.000039  |
| 254 | 0.000038  | 0.000478  | -0.000385 | -0.000417 | -0.000301 | 0.000050  | 0.000364  | 0.000304  | -0.000013 | -0.000124 | 0.000003  | -0.000040 |

|     |           |           |           |           |           |           |           |           |           |           |           |           |
|-----|-----------|-----------|-----------|-----------|-----------|-----------|-----------|-----------|-----------|-----------|-----------|-----------|
| 255 | 0.000012  | 0.000447  | -0.000460 | -0.000031 | 0.000151  | 0.000051  | -0.000077 | -0.000106 | 0.000001  | -0.000085 | 0.000064  | -0.000029 |
| 256 | -0.000470 | -0.000824 | 0.000896  | -0.000052 | -0.001252 | -0.000045 | 0.000903  | 0.000503  | 0.000019  | -0.000061 | -0.000191 | -0.000056 |
| 257 | -0.000206 | -0.000514 | 0.000440  | -0.000536 | -0.000379 | -0.000078 | 0.000423  | 0.000586  | -0.000006 | -0.000158 | -0.000334 | -0.000083 |
| 258 | -0.023556 | 0.003139  | 0.000881  | -0.000454 | -0.003948 | 0.000005  | 0.002966  | 0.001547  | 0.000080  | 0.000708  | 0.001579  | -0.000277 |
| 259 | 0.025147  | -0.006012 | -0.001589 | 0.000348  | 0.001108  | -0.000118 | -0.000714 | -0.000641 | -0.000069 | 0.000070  | -0.001034 | 0.000093  |
| 260 | -0.005726 | -0.001205 | 0.000496  | 0.000163  | 0.000815  | 0.000010  | -0.000644 | -0.000374 | -0.000020 | -0.000246 | -0.000698 | 0.000020  |
| 261 | -0.006595 | -0.001384 | 0.000617  | 0.000161  | 0.000685  | -0.000041 | -0.000520 | -0.000313 | -0.000018 | -0.000238 | -0.000502 | 0.000064  |
| 262 | 0.009119  | 0.001781  | -0.000192 | -0.000080 | 0.000110  | 0.000041  | -0.000106 | 0.000031  | 0.000005  | 0.000004  | 0.000301  | -0.000001 |
| 263 | 0.007325  | 0.001494  | -0.000192 | -0.000053 | 0.000156  | 0.000032  | -0.000140 | -0.000001 | 0.000011  | -0.000017 | 0.000248  | 0.000005  |
| 264 | -0.000463 | -0.001180 | -0.000112 | 0.000053  | -0.000070 | -0.000030 | 0.000074  | -0.000025 | 0.000001  | 0.000119  | 0.000054  | -0.000028 |
| 265 | -0.000780 | -0.001167 | -0.000077 | 0.000057  | 0.000071  | -0.000020 | -0.000039 | -0.000068 | -0.000001 | 0.000136  | 0.000058  | -0.000047 |
| 266 | -0.005369 | -0.000240 | 0.000260  | 0.000045  | -0.000199 | -0.000014 | 0.000146  | 0.000026  | -0.000006 | -0.000111 | -0.000253 | 0.000069  |
| 267 | -0.006220 | -0.000218 | 0.000283  | -0.000011 | -0.000372 | -0.000040 | 0.000319  | 0.000117  | -0.000010 | -0.000085 | -0.000189 | 0.000065  |
| 268 | 0.005494  | 0.002505  | -0.000354 | -0.000180 | 0.001875  | 0.000088  | -0.001438 | -0.000395 | 0.000010  | -0.000212 | 0.000326  | 0.000076  |
| 269 | 0.001643  | 0.002485  | -0.000022 | -0.000050 | -0.000249 | 0.000085  | 0.000109  | 0.000102  | 0.000017  | -0.000127 | 0.000110  | -0.000038 |
| 270 | 0.001476  | -0.025026 | 0.033994  | 0.000384  | 0.000889  | 0.000086  | -0.000981 | -0.000387 | -0.000049 | 0.000696  | 0.000016  | -0.000160 |
| 271 | -0.003571 | 0.033479  | -0.026599 | -0.003240 | -0.004051 | 0.000713  | 0.003696  | 0.003039  | 0.000200  | -0.000032 | 0.000925  | -0.000058 |
| 272 | -0.001018 | -0.007108 | 0.003483  | 0.000778  | 0.000565  | -0.000355 | -0.000306 | -0.000718 | -0.000025 | -0.000261 | -0.000280 | 0.000072  |
| 273 | -0.000254 | -0.007774 | 0.002602  | 0.000842  | 0.000994  | -0.000273 | -0.000932 | -0.000691 | -0.000080 | -0.000188 | -0.000099 | 0.000075  |
| 274 | 0.000560  | 0.006158  | -0.007067 | -0.000790 | -0.000802 | 0.000267  | 0.000685  | 0.000671  | 0.000022  | 0.000004  | -0.000021 | -0.000031 |
| 275 | 0.000865  | 0.006256  | -0.007110 | 0.000093  | 0.000072  | 0.000043  | -0.000038 | -0.000167 | -0.000014 | -0.000021 | -0.000109 | -0.000002 |
| 276 | 0.000192  | 0.005101  | -0.002081 | 0.000057  | 0.000136  | 0.000006  | -0.000185 | -0.000008 | -0.000003 | 0.000053  | 0.000155  | -0.000004 |
| 277 | 0.000040  | 0.004360  | -0.001310 | -0.000086 | -0.000044 | 0.000057  | -0.000023 | 0.000107  | 0.000018  | 0.000056  | 0.000136  | -0.000010 |
| 278 | -0.000776 | -0.008510 | 0.006866  | 0.000134  | 0.000112  | -0.000081 | -0.000093 | -0.000088 | 0.000003  | -0.000105 | 0.000008  | 0.000036  |
| 279 | -0.000931 | -0.010667 | 0.008811  | -0.000021 | -0.000021 | -0.000041 | 0.000021  | 0.000050  | 0.000013  | -0.000046 | 0.000077  | 0.000002  |
| 280 | 0.000990  | 0.001301  | -0.005398 | 0.000651  | 0.000771  | -0.000140 | -0.000662 | -0.000647 | -0.000035 | -0.000106 | -0.000302 | 0.000062  |
| 281 | 0.002410  | 0.002440  | -0.006254 | 0.001190  | 0.001372  | -0.000280 | -0.001180 | -0.001153 | -0.000048 | -0.000047 | -0.000505 | 0.000017  |
| 282 | -0.000741 | -0.001657 | -0.000899 | -0.000225 | -0.000588 | 0.000032  | 0.000931  | -0.000102 | -0.000085 | 0.004800  | 0.003561  | -0.004357 |
| 283 | -0.000359 | -0.000400 | 0.000257  | 0.000416  | 0.000617  | -0.000141 | -0.000619 | -0.000300 | 0.000064  | 0.000635  | 0.005408  | 0.002835  |
| 284 | 0.000228  | 0.000372  | 0.000275  | 0.000015  | -0.000005 | 0.000000  | 0.000030  | -0.000040 | 0.000012  | -0.004662 | -0.003354 | 0.001924  |
| 285 | 0.000239  | 0.000342  | -0.000098 | 0.000036  | 0.000127  | -0.000026 | -0.000165 | 0.000014  | 0.000037  | -0.002299 | -0.000350 | 0.000171  |
| 286 | -0.000127 | -0.000196 | -0.000498 | -0.000044 | 0.000061  | -0.000008 | -0.000151 | 0.000130  | 0.000048  | -0.002316 | -0.001399 | -0.000889 |
| 287 | -0.000126 | 0.000082  | -0.000227 | 0.000616  | 0.001083  | -0.000221 | -0.001212 | -0.000336 | 0.000193  | -0.006343 | -0.005940 | 0.002039  |
| 288 | -0.001693 | -0.001202 | 0.000220  | 0.000423  | 0.000312  | 0.000043  | -0.000596 | -0.000189 | -0.000015 | 0.000196  | 0.000417  | -0.000166 |
| 289 | -0.000337 | -0.000351 | -0.000042 | 0.000801  | 0.000331  | -0.000147 | -0.000418 | -0.000572 | -0.000021 | 0.000091  | 0.000208  | -0.000044 |
| 290 | 0.000144  | -0.000075 | -0.000055 | -0.000306 | -0.000101 | 0.000072  | 0.000121  | 0.000216  | 0.000020  | -0.000008 | -0.000081 | 0.000029  |
| 291 | 0.000245  | 0.000297  | -0.000214 | -0.000339 | -0.000198 | 0.000071  | 0.000198  | 0.000273  | 0.000015  | -0.000052 | -0.000071 | -0.000005 |
| 292 | 0.000060  | 0.000251  | 0.000089  | -0.000158 | -0.000172 | 0.000030  | 0.000177  | 0.000127  | 0.000009  | -0.000127 | -0.000124 | -0.000016 |
| 293 | 0.000085  | 0.000109  | -0.000114 | 0.000029  | -0.000102 | -0.000011 | 0.000126  | -0.000036 | 0.000003  | -0.000174 | -0.000169 | 0.000032  |
| 294 | -0.008083 | 0.002672  | 0.001782  | 0.000070  | 0.000978  | 0.000150  | -0.000965 | -0.000253 | -0.000047 | 0.000148  | -0.000031 | -0.000056 |
| 295 | -0.000171 | -0.000281 | -0.000118 | 0.000245  | 0.001217  | 0.000078  | -0.001046 | -0.000527 | -0.000006 | -0.000002 | -0.000008 | -0.000019 |
| 296 | 0.000403  | 0.000402  | 0.000239  | -0.000169 | -0.000469 | -0.000030 | 0.000431  | 0.000249  | 0.000010  | -0.000040 | -0.000005 | 0.000016  |
| 297 | 0.002832  | 0.000042  | -0.000371 | -0.000200 | -0.000416 | -0.000006 | 0.000376  | 0.000258  | 0.000005  | -0.000002 | 0.000010  | 0.000009  |
| 298 | 0.002025  | -0.000565 | -0.000276 | -0.000070 | -0.000091 | -0.000011 | 0.000095  | 0.000079  | 0.000008  | 0.000023  | 0.000018  | 0.000003  |
| 299 | -0.000094 | 0.000015  | -0.000194 | -0.000119 | 0.000038  | 0.000005  | 0.000038  | 0.000036  | 0.000023  | -0.000056 | -0.000035 | 0.000034  |
| 300 | 0.002959  | -0.009310 | 0.012622  | -0.000027 | -0.000249 | -0.000049 | 0.000440  | -0.000101 | 0.000030  | -0.000432 | -0.000331 | 0.000128  |
| 301 | 0.000697  | 0.000707  | 0.001186  | 0.000455  | 0.000394  | -0.000143 | -0.000258 | -0.000460 | -0.000018 | 0.000017  | -0.000105 | 0.000021  |
| 302 | 0.000200  | 0.000660  | -0.002437 | 0.000007  | 0.000037  | -0.000010 | -0.000043 | 0.000010  | 0.000008  | -0.000060 | -0.000052 | -0.000016 |
| 303 | -0.000101 | 0.003797  | -0.004375 | 0.000228  | 0.000221  | -0.000103 | -0.000165 | -0.000186 | 0.000002  | -0.000010 | -0.000057 | -0.000026 |
| 304 | -0.000430 | 0.003301  | -0.001552 | 0.000329  | 0.000346  | -0.000141 | -0.000293 | -0.000248 | 0.000013  | -0.000011 | 0.000029  | -0.000017 |

|     |           |           |           |           |           |           |           |           |           |           |           |           |
|-----|-----------|-----------|-----------|-----------|-----------|-----------|-----------|-----------|-----------|-----------|-----------|-----------|
| 305 | 0.000379  | 0.002365  | -0.000646 | 0.000954  | 0.001009  | -0.000375 | -0.000880 | -0.000737 | -0.000029 | 0.000026  | -0.000077 | -0.000049 |
| 306 | 0.000018  | -0.005843 | -0.010383 | 0.002743  | 0.004353  | -0.000821 | -0.004762 | -0.001718 | 0.000439  | -0.044569 | 0.016392  | -0.002049 |
| 307 | -0.000313 | -0.000424 | -0.000597 | 0.000606  | 0.001076  | -0.000275 | -0.001157 | -0.000317 | 0.000182  | -0.000431 | 0.006923  | -0.003509 |
| 308 | 0.000150  | 0.000115  | 0.000368  | -0.000414 | -0.000746 | 0.000147  | 0.000902  | 0.000156  | -0.000112 | 0.000979  | -0.002862 | 0.002704  |
| 309 | -0.000127 | -0.000299 | -0.000144 | -0.000106 | -0.000253 | 0.000056  | 0.000294  | 0.000029  | -0.000050 | 0.000655  | 0.001688  | -0.002298 |
| 310 | 0.000182  | 0.000183  | -0.000142 | -0.000030 | 0.000006  | 0.000002  | -0.000046 | 0.000064  | 0.000006  | -0.000082 | -0.001230 | 0.000011  |
| 311 | 0.000221  | 0.000632  | 0.000654  | 0.000119  | 0.000210  | -0.000048 | -0.000224 | -0.000071 | 0.000031  | -0.000273 | -0.001905 | -0.000209 |
| 312 | -0.000107 | -0.000213 | -0.000137 | -0.000175 | -0.000299 | 0.000118  | 0.000241  | 0.000135  | -0.000058 | -0.001706 | -0.003290 | 0.004343  |
| 313 | -0.004772 | -0.002906 | 0.003497  | 0.002585  | 0.000851  | -0.000433 | -0.001037 | -0.001959 | -0.000065 | 0.000107  | 0.000410  | -0.000193 |
| 314 | -0.000216 | 0.000424  | -0.000207 | -0.000235 | -0.000012 | 0.000097  | -0.000077 | 0.000227  | -0.000005 | 0.000013  | 0.000121  | -0.000134 |
| 315 | -0.000271 | -0.000627 | -0.000023 | 0.000155  | 0.000137  | -0.000021 | -0.000160 | -0.000116 | 0.000007  | 0.000056  | 0.000062  | 0.000012  |
| 316 | -0.000162 | -0.000121 | 0.000217  | 0.000046  | -0.000020 | -0.000003 | 0.000002  | -0.000025 | -0.000001 | 0.000034  | 0.000022  | 0.000013  |
| 317 | 0.000257  | 0.000421  | -0.000147 | -0.000302 | -0.000153 | 0.000063  | 0.000152  | 0.000242  | 0.000003  | -0.000009 | -0.000031 | -0.000017 |
| 318 | 0.000274  | -0.000030 | -0.000114 | -0.000210 | 0.000113  | 0.000015  | -0.000009 | 0.000088  | 0.000006  | 0.000011  | -0.000041 | 0.000028  |
| 319 | 0.000113  | -0.000066 | 0.000266  | 0.000536  | -0.000081 | -0.000150 | 0.000104  | -0.000405 | -0.000011 | -0.000103 | -0.000130 | 0.000097  |
| 320 | 0.037326  | -0.007252 | -0.008196 | -0.000150 | 0.002283  | 0.000224  | -0.001808 | -0.000593 | 0.000051  | -0.000257 | 0.000275  | 0.000230  |
| 321 | 0.004713  | 0.000702  | -0.000458 | -0.000292 | -0.000446 | 0.000082  | 0.000296  | 0.000367  | -0.000014 | 0.000096  | 0.000008  | -0.000056 |
| 322 | -0.003332 | 0.001012  | 0.000625  | 0.000052  | 0.000195  | 0.000010  | -0.000169 | -0.000093 | -0.000004 | -0.000034 | -0.000017 | 0.000024  |
| 323 | -0.001424 | -0.000394 | 0.000369  | 0.000112  | 0.000231  | -0.000020 | -0.000193 | -0.000133 | -0.000001 | 0.000018  | 0.000010  | -0.000010 |
| 324 | 0.001877  | -0.000127 | -0.000440 | -0.000136 | -0.000362 | 0.000002  | 0.000304  | 0.000203  | -0.000008 | 0.000029  | 0.000011  | -0.000008 |
| 325 | 0.001579  | 0.000753  | 0.000001  | -0.000135 | -0.000890 | -0.000032 | 0.000735  | 0.000340  | 0.000012  | -0.000064 | -0.000013 | 0.000011  |
| 326 | -0.003364 | -0.001964 | -0.000102 | 0.000399  | 0.001257  | -0.000043 | -0.000960 | -0.000680 | 0.000015  | -0.000047 | -0.000004 | 0.000040  |
| 327 | -0.007429 | 0.034648  | 0.022821  | 0.002405  | 0.002078  | -0.000875 | -0.001519 | -0.002145 | -0.000127 | -0.000068 | -0.000528 | -0.000181 |
| 328 | 0.000123  | 0.008504  | -0.006005 | 0.000908  | 0.000738  | -0.000390 | -0.000488 | -0.000782 | -0.000032 | -0.000165 | -0.000134 | 0.000032  |
| 329 | 0.001037  | -0.005332 | 0.003157  | -0.000274 | -0.000276 | 0.000119  | 0.000264  | 0.000173  | 0.000028  | -0.000048 | -0.000098 | 0.000026  |
| 330 | -0.000068 | -0.002062 | 0.002908  | -0.000377 | -0.000357 | 0.000130  | 0.000288  | 0.000327  | 0.000016  | -0.000033 | 0.000064  | 0.000005  |
| 331 | -0.000475 | 0.001843  | -0.002094 | -0.000063 | -0.000078 | 0.000023  | 0.000050  | 0.000070  | -0.000016 | 0.000021  | -0.000006 | -0.000017 |
| 332 | -0.000192 | 0.002415  | -0.005588 | 0.000155  | 0.000156  | -0.000051 | -0.000138 | -0.000125 | -0.000004 | 0.000020  | 0.000041  | 0.000014  |
| 333 | -0.000438 | -0.005333 | 0.007514  | -0.000359 | -0.000195 | 0.000171  | 0.000033  | 0.000347  | 0.000008  | 0.000205  | 0.000136  | -0.000061 |

|    | 193       | 194       | 195       | 196       | 197       | 198       | 199       | 200       | 201       | 202       | 203       | 204       |
|----|-----------|-----------|-----------|-----------|-----------|-----------|-----------|-----------|-----------|-----------|-----------|-----------|
| 1  | 0.000118  | -0.000706 | 0.000139  | 0.000088  | -0.000311 | -0.000214 | -0.000360 | 0.000167  | 0.000071  | -0.000718 | 0.000330  | 0.000046  |
| 2  | -0.001068 | 0.001990  | 0.001248  | -0.001138 | 0.000405  | 0.000544  | 0.001432  | 0.000046  | 0.001407  | 0.001884  | -0.001138 | -0.000040 |
| 3  | 0.006991  | -0.005736 | 0.010627  | 0.002973  | 0.000533  | -0.000044 | 0.000716  | 0.000966  | 0.000263  | 0.001185  | -0.000359 | -0.000473 |
| 4  | -0.008567 | 0.009080  | -0.015427 | -0.000323 | 0.000478  | 0.000157  | 0.000135  | 0.001384  | 0.008671  | -0.003821 | 0.004205  | -0.004809 |
| 5  | -0.000167 | 0.001174  | -0.000085 | 0.000069  | 0.000422  | 0.000135  | 0.000367  | 0.000039  | -0.013046 | 0.007002  | -0.005649 | 0.003423  |
| 6  | -0.000910 | 0.002220  | -0.000929 | -0.000241 | 0.000295  | 0.000271  | 0.000369  | 0.000324  | -0.000340 | 0.001073  | 0.000390  | -0.000428 |
| 7  | 0.000237  | 0.000154  | -0.000376 | 0.000367  | 0.000152  | -0.000008 | -0.000007 | -0.000011 | -0.000107 | 0.000370  | 0.000103  | -0.000432 |
| 8  | -0.000676 | -0.002661 | -0.010400 | -0.000044 | -0.000667 | -0.000206 | -0.000432 | 0.000474  | -0.000429 | -0.000655 | 0.000717  | -0.000322 |
| 9  | 0.010043  | -0.005548 | 0.030063  | 0.002487  | 0.001726  | 0.000235  | 0.001522  | -0.000551 | 0.001859  | 0.002495  | -0.000976 | 0.000486  |
| 10 | -0.015489 | 0.018562  | -0.009412 | -0.003581 | 0.001338  | 0.000561  | 0.001164  | 0.000578  | -0.012726 | -0.001328 | -0.001086 | 0.001090  |
| 11 | 0.001228  | -0.003991 | -0.006317 | 0.001079  | -0.000477 | -0.000224 | -0.000705 | 0.000251  | 0.032416  | -0.005510 | 0.007184  | -0.010132 |
| 12 | 0.001335  | 0.000722  | 0.002958  | 0.000508  | 0.000493  | 0.000107  | 0.000440  | 0.000107  | -0.008391 | 0.014932  | -0.009724 | 0.005103  |
| 13 | -0.001033 | 0.000388  | -0.001428 | -0.000177 | -0.000024 | 0.000049  | -0.000017 | -0.000218 | -0.004404 | -0.003597 | 0.000056  | -0.000750 |
| 14 | 0.001052  | -0.000935 | -0.000178 | -0.000277 | 0.000040  | 0.000131  | 0.000032  | -0.000139 | 0.002311  | 0.000954  | 0.001083  | -0.000800 |
| 15 | -0.001431 | 0.003086  | 0.001150  | 0.000253  | 0.000364  | 0.000222  | 0.000384  | 0.000307  | -0.001122 | 0.000280  | -0.000736 | 0.000175  |
| 16 | -0.002663 | -0.000212 | -0.005821 | 0.000260  | 0.000072  | 0.000335  | -0.000057 | -0.001147 | 0.001238  | -0.000230 | 0.000212  | -0.000164 |
| 17 | -0.001151 | 0.004132  | 0.002033  | 0.000724  | 0.000908  | 0.000184  | 0.001111  | 0.001897  | -0.000646 | 0.000831  | -0.000349 | 0.000680  |
| 18 | 0.005418  | -0.009907 | 0.017625  | -0.000914 | -0.000557 | -0.000811 | -0.000757 | 0.001103  | 0.000806  | -0.000460 | 0.000938  | -0.000781 |

|    |           |           |           |           |           |           |           |           |           |           |           |           |
|----|-----------|-----------|-----------|-----------|-----------|-----------|-----------|-----------|-----------|-----------|-----------|-----------|
| 19 | -0.008807 | 0.006183  | -0.003470 | -0.001180 | -0.000775 | -0.000740 | -0.000630 | -0.000659 | -0.010937 | 0.001466  | -0.002232 | 0.003359  |
| 20 | 0.000423  | 0.002718  | 0.003632  | 0.002646  | 0.001095  | 0.000179  | 0.000791  | 0.000461  | 0.001597  | 0.003988  | -0.001197 | 0.000554  |
| 21 | 0.004462  | -0.007048 | 0.006503  | -0.000013 | -0.000259 | 0.000326  | 0.000122  | 0.000141  | 0.020935  | -0.009843 | 0.003978  | -0.006686 |
| 22 | -0.000662 | 0.000782  | 0.000356  | 0.000211  | -0.000053 | -0.000107 | -0.000084 | -0.000029 | -0.001903 | 0.004316  | -0.005554 | 0.004410  |
| 23 | 0.000672  | -0.000415 | 0.000038  | -0.000246 | 0.000213  | 0.000258  | 0.000221  | -0.000209 | 0.004498  | 0.002718  | -0.000185 | -0.001547 |
| 24 | -0.000392 | 0.000458  | 0.001036  | 0.000441  | 0.000024  | -0.000111 | 0.000026  | 0.000142  | 0.004131  | -0.005640 | 0.001572  | -0.002761 |
| 25 | 0.000299  | -0.000012 | 0.001156  | 0.000183  | -0.000020 | -0.000088 | -0.000019 | 0.000314  | 0.000812  | 0.000338  | -0.000790 | 0.000761  |
| 26 | -0.000127 | 0.000391  | -0.000037 | -0.000148 | 0.000226  | 0.000300  | 0.000237  | -0.000419 | -0.000210 | -0.000025 | 0.000380  | -0.000397 |
| 27 | 0.000685  | -0.000781 | 0.001153  | 0.000018  | -0.000036 | -0.000064 | -0.000016 | 0.000226  | 0.000789  | 0.000537  | -0.000231 | 0.000240  |
| 28 | 0.002659  | -0.005674 | -0.020331 | 0.004069  | 0.000011  | -0.000661 | -0.000415 | 0.004453  | -0.004417 | -0.002460 | 0.000269  | 0.000326  |
| 29 | -0.016467 | 0.013128  | -0.042331 | 0.001724  | -0.000376 | -0.000388 | -0.000407 | 0.003827  | 0.004780  | 0.002964  | 0.000145  | 0.000639  |
| 30 | -0.000110 | 0.002678  | 0.003924  | 0.001611  | 0.000806  | 0.000192  | 0.000737  | 0.000365  | -0.015189 | -0.006695 | 0.001646  | -0.012396 |
| 31 | 0.000216  | -0.002921 | -0.003195 | -0.001047 | -0.000693 | -0.000067 | -0.000633 | -0.000567 | -0.038249 | 0.009633  | -0.010342 | 0.000314  |
| 32 | 0.001686  | -0.001727 | 0.000816  | 0.000052  | -0.000008 | 0.000041  | -0.000001 | -0.000083 | 0.004715  | 0.002365  | -0.000446 | -0.000816 |
| 33 | -0.001222 | 0.001195  | 0.001017  | 0.000044  | 0.000052  | 0.000074  | 0.000032  | -0.000245 | -0.003387 | -0.002599 | -0.000517 | 0.000409  |
| 34 | 0.000984  | -0.003633 | -0.002824 | -0.000507 | -0.000582 | 0.000025  | -0.000617 | -0.001039 | 0.000787  | -0.001383 | 0.001270  | -0.001486 |
| 35 | -0.000114 | 0.002639  | 0.006616  | 0.000690  | 0.000852  | 0.000176  | 0.000948  | 0.001007  | 0.000158  | 0.001375  | -0.001313 | 0.001946  |
| 36 | -0.000011 | 0.000357  | 0.000204  | 0.000008  | 0.000072  | 0.000064  | 0.000118  | -0.000009 | 0.000008  | 0.000071  | 0.000061  | -0.000032 |
| 37 | -0.003216 | 0.002239  | -0.000910 | 0.000210  | -0.000072 | -0.000139 | -0.000073 | 0.001644  | 0.000017  | 0.000078  | -0.000014 | 0.000012  |
| 38 | 0.003642  | -0.004732 | 0.006544  | 0.003349  | -0.000154 | -0.000151 | -0.000016 | 0.000203  | 0.000157  | 0.000387  | -0.000009 | 0.000034  |
| 39 | 0.000083  | 0.000293  | 0.000234  | 0.000048  | 0.000146  | 0.000035  | 0.000079  | -0.000004 | -0.003230 | 0.002608  | -0.003246 | 0.003366  |
| 40 | 0.000009  | 0.000042  | 0.000098  | 0.000014  | 0.000056  | 0.000011  | 0.000042  | 0.000028  | 0.005344  | -0.002740 | 0.001856  | -0.003213 |
| 41 | -0.000010 | 0.000071  | -0.000001 | -0.000013 | 0.000038  | 0.000027  | 0.000031  | -0.000009 | 0.000245  | 0.000367  | 0.000064  | 0.000023  |
| 42 | 0.000004  | 0.000048  | 0.000007  | -0.000017 | 0.000025  | 0.000040  | 0.000026  | -0.000024 | 0.000041  | 0.000118  | 0.000025  | -0.000009 |
| 43 | 0.000027  | 0.000116  | -0.000015 | -0.000034 | 0.000016  | 0.000044  | 0.000039  | -0.000030 | 0.000013  | 0.000079  | -0.000009 | 0.000003  |
| 44 | -0.016461 | -0.004059 | 0.286255  | -0.002055 | 0.004068  | 0.000417  | 0.003772  | -0.002290 | 0.000133  | -0.000105 | 0.000154  | -0.000097 |
| 45 | -0.000155 | 0.000070  | 0.000221  | -0.000020 | 0.000001  | -0.000013 | 0.000000  | -0.000096 | 0.275481  | -0.004508 | -0.016670 | -0.017722 |
| 46 | -0.000002 | 0.000173  | 0.000382  | 0.000035  | 0.000078  | 0.000042  | 0.000091  | 0.000000  | 0.000157  | 0.000093  | -0.000186 | 0.000177  |
| 47 | 0.000128  | -0.000097 | 0.000518  | -0.000024 | 0.000029  | 0.000020  | 0.000068  | 0.000058  | 0.000187  | 0.000317  | 0.000130  | -0.000080 |
| 48 | 0.000005  | -0.000272 | -0.000393 | 0.000114  | -0.000091 | -0.000115 | -0.000116 | 0.000096  | -0.000261 | -0.000090 | 0.000285  | -0.000172 |
| 49 | 0.000019  | 0.000033  | 0.000350  | -0.000008 | -0.000020 | 0.000056  | 0.000058  | -0.000055 | -0.000250 | 0.000094  | -0.000320 | -0.000553 |
| 50 | -0.000082 | 0.000391  | 0.000653  | -0.000540 | 0.000198  | 0.000277  | 0.000203  | -0.000122 | -0.000138 | 0.000067  | -0.000139 | 0.000171  |
| 51 | -0.000008 | 0.000793  | -0.000055 | -0.000015 | 0.000548  | 0.000094  | 0.000113  | -0.000337 | 0.000200  | 0.000438  | 0.000115  | -0.000123 |
| 52 | 0.000093  | -0.000733 | -0.000790 | 0.000011  | -0.000563 | -0.000286 | -0.000216 | 0.000370  | -0.000220 | -0.000333 | 0.000174  | -0.000111 |
| 53 | 0.000022  | 0.000057  | -0.000001 | -0.000014 | 0.000032  | 0.000017  | 0.000020  | -0.000007 | -0.000162 | 0.000096  | 0.000024  | -0.000182 |
| 54 | 0.000011  | 0.000063  | -0.000020 | 0.000000  | 0.000034  | 0.000015  | 0.000005  | -0.000018 | -0.000002 | 0.000057  | -0.000027 | -0.000065 |
| 55 | -0.000002 | -0.000458 | -0.000058 | -0.000025 | -0.000394 | -0.000218 | -0.000119 | 0.000146  | -0.000212 | -0.000332 | -0.000132 | -0.000291 |
| 56 | 0.000048  | 0.000357  | -0.000294 | -0.000155 | 0.000106  | 0.000070  | 0.000049  | -0.000139 | 0.000040  | 0.000039  | -0.000037 | 0.000009  |
| 57 | -0.000010 | 0.000049  | -0.000015 | 0.000098  | 0.000045  | -0.000003 | 0.000000  | -0.000038 | 0.000002  | 0.000002  | 0.000017  | 0.000042  |
| 58 | 0.000014  | 0.000076  | 0.000085  | -0.000011 | 0.000054  | 0.000077  | 0.000063  | 0.000006  | 0.000029  | 0.000068  | 0.000019  | 0.000053  |
| 59 | -0.000038 | 0.000117  | 0.000020  | -0.000019 | 0.000128  | 0.000027  | 0.000033  | -0.000058 | 0.000008  | 0.000125  | 0.000021  | 0.000019  |
| 60 | 0.000033  | 0.000063  | -0.000096 | 0.000005  | -0.000009 | -0.000019 | -0.000016 | 0.000021  | 0.000074  | 0.000045  | 0.000081  | -0.000050 |
| 61 | -0.001022 | -0.000282 | -0.001447 | -0.000435 | 0.000416  | -0.000356 | -0.000267 | -0.000952 | 0.001440  | 0.000833  | 0.000758  | 0.001119  |
| 62 | 0.001025  | 0.000895  | 0.003480  | 0.000414  | -0.000181 | 0.000490  | 0.000452  | 0.000552  | 0.000833  | -0.000363 | -0.000310 | -0.000668 |
| 63 | 0.000504  | 0.000423  | 0.000654  | 0.000477  | -0.000002 | 0.000427  | 0.000421  | 0.000409  | 0.001466  | -0.000113 | -0.000092 | -0.000460 |
| 64 | -0.000565 | 0.000336  | 0.000909  | -0.000449 | 0.000169  | -0.000272 | -0.000186 | -0.000612 | 0.000406  | 0.000308  | 0.000346  | 0.000849  |
| 65 | -0.000244 | -0.000196 | -0.000642 | 0.000065  | 0.000048  | -0.000548 | -0.000427 | -0.000169 | -0.001303 | 0.000628  | 0.001090  | 0.000405  |
| 66 | -0.000336 | -0.000902 | -0.002779 | -0.000181 | 0.000130  | 0.000048  | -0.000070 | -0.000050 | -0.000621 | -0.000308 | -0.000994 | -0.000927 |
| 67 | 0.000862  | -0.000049 | 0.001705  | -0.000137 | -0.000461 | 0.000485  | 0.000276  | 0.000673  | -0.001489 | -0.001357 | -0.001777 | -0.001011 |
| 68 | -0.000110 | -0.000350 | -0.001486 | 0.000200  | -0.000117 | -0.000264 | -0.000202 | 0.000065  | -0.000800 | 0.000417  | 0.000922  | 0.000720  |

|     |           |           |           |           |           |           |           |           |           |           |           |           |
|-----|-----------|-----------|-----------|-----------|-----------|-----------|-----------|-----------|-----------|-----------|-----------|-----------|
| 69  | -0.001855 | 0.001480  | -0.007382 | 0.000912  | -0.000082 | -0.000215 | -0.000057 | 0.001480  | 0.003197  | -0.000576 | 0.001089  | 0.000017  |
| 70  | -0.000394 | 0.000777  | 0.001051  | -0.000251 | 0.000022  | 0.000068  | -0.000001 | -0.000523 | -0.006019 | 0.000667  | -0.000793 | -0.001426 |
| 71  | 0.000917  | -0.001290 | 0.002278  | -0.000126 | -0.000077 | 0.000089  | -0.000057 | -0.000471 | 0.001350  | 0.000424  | -0.000401 | 0.000584  |
| 72  | 0.001348  | -0.001102 | 0.003763  | -0.000540 | 0.000100  | 0.000033  | 0.000076  | -0.000438 | 0.001087  | -0.000572 | 0.000036  | 0.000750  |
| 73  | -0.004744 | 0.001803  | -0.010190 | -0.000075 | -0.000365 | 0.000084  | -0.000418 | -0.000200 | -0.000850 | -0.000034 | -0.000367 | -0.000104 |
| 74  | 0.001291  | -0.001155 | 0.004116  | 0.000153  | 0.000396  | 0.000129  | 0.000288  | -0.000283 | 0.000533  | 0.000346  | 0.000023  | 0.000247  |
| 75  | 0.003977  | -0.000029 | 0.009034  | -0.000093 | 0.000435  | 0.000016  | 0.000462  | -0.000167 | 0.000288  | 0.000229  | 0.000241  | 0.000079  |
| 76  | 0.005371  | -0.009117 | 0.000670  | 0.001674  | -0.000922 | -0.000353 | -0.000827 | -0.001374 | 0.000930  | 0.000084  | -0.000302 | -0.000772 |
| 77  | -0.008832 | 0.004961  | -0.024364 | -0.003667 | -0.000954 | -0.000258 | -0.001124 | 0.000719  | -0.013396 | 0.002502  | -0.003756 | 0.004008  |
| 78  | -0.004145 | 0.006812  | -0.001851 | -0.000975 | 0.000573  | 0.000087  | 0.000276  | -0.000300 | 0.003574  | -0.000818 | 0.001031  | -0.001012 |
| 79  | -0.001638 | 0.001899  | 0.000985  | -0.000518 | 0.000217  | 0.000215  | 0.000307  | 0.000056  | 0.012014  | -0.000401 | 0.003095  | -0.002862 |
| 80  | 0.005968  | -0.008407 | 0.005677  | 0.001058  | -0.000492 | 0.000027  | -0.000154 | 0.000147  | 0.001144  | -0.008842 | 0.003572  | -0.005705 |
| 81  | -0.000206 | 0.000740  | -0.000120 | -0.000037 | 0.000043  | -0.000177 | -0.000066 | 0.000094  | -0.022370 | 0.002457  | -0.005112 | 0.002870  |
| 82  | 0.000049  | 0.000247  | 0.000508  | 0.000017  | 0.000066  | 0.000089  | 0.000090  | -0.000110 | -0.000827 | 0.006024  | -0.002014 | 0.003185  |
| 83  | 0.000177  | 0.000155  | 0.000764  | 0.000162  | 0.000092  | 0.000058  | 0.000108  | -0.000067 | 0.000967  | 0.001395  | -0.001177 | 0.000616  |
| 84  | -0.000229 | -0.000251 | -0.000823 | 0.000186  | -0.000100 | -0.000150 | -0.000080 | 0.000306  | 0.003681  | -0.006623 | 0.002838  | -0.003504 |
| 85  | -0.000625 | 0.000561  | -0.001405 | 0.000034  | -0.000139 | -0.000135 | -0.000145 | 0.000261  | 0.000126  | 0.000455  | 0.000373  | -0.000043 |
| 86  | 0.000208  | 0.000156  | 0.000951  | 0.000058  | 0.000114  | 0.000066  | 0.000109  | 0.000010  | 0.000448  | 0.000163  | -0.000188 | 0.000118  |
| 87  | 0.000290  | -0.000142 | 0.000824  | 0.000030  | 0.000123  | 0.000083  | 0.000103  | -0.000077 | 0.000566  | 0.000224  | -0.000043 | 0.000008  |
| 88  | -0.000765 | 0.001299  | -0.001229 | -0.000112 | -0.000117 | -0.000083 | -0.000078 | 0.000309  | -0.000936 | -0.000204 | 0.000265  | -0.000644 |
| 89  | 0.003040  | -0.012091 | -0.008597 | -0.004670 | -0.003199 | -0.000873 | -0.002965 | -0.003841 | -0.001679 | -0.000376 | 0.000041  | 0.000341  |
| 90  | 0.000183  | -0.000539 | -0.000907 | -0.000328 | -0.000033 | 0.000155  | -0.000004 | 0.000024  | -0.007629 | -0.013135 | 0.004194  | 0.003568  |
| 91  | 0.000176  | -0.000437 | 0.000118  | -0.000088 | -0.000062 | 0.000029  | -0.000060 | -0.000120 | -0.001142 | -0.000722 | -0.000117 | -0.000212 |
| 92  | 0.000131  | -0.000920 | -0.000585 | 0.000005  | 0.000000  | 0.000096  | -0.000003 | -0.000428 | -0.000125 | -0.000342 | 0.000006  | 0.000138  |
| 93  | -0.000753 | 0.000289  | -0.002053 | -0.000079 | -0.000237 | -0.000097 | -0.000212 | 0.000132  | -0.000261 | -0.000183 | -0.000011 | -0.000118 |
| 94  | -0.000536 | 0.000863  | -0.002069 | -0.000072 | -0.000159 | -0.000032 | -0.000077 | 0.000148  | -0.000274 | -0.000163 | -0.000012 | -0.000129 |
| 95  | -0.001706 | -0.001363 | -0.010537 | 0.000456  | 0.000009  | 0.000324  | 0.000123  | -0.000260 | -0.000152 | -0.000180 | -0.000151 | -0.000019 |
| 96  | -0.002246 | 0.001338  | 0.001476  | -0.000343 | -0.000438 | -0.000339 | -0.000588 | 0.000390  | -0.000158 | -0.000050 | -0.000089 | -0.000058 |
| 97  | 0.002442  | -0.002952 | 0.002721  | 0.000693  | -0.000685 | -0.000380 | -0.000337 | -0.000110 | -0.001828 | 0.000121  | -0.000566 | 0.000433  |
| 98  | 0.001712  | -0.003865 | -0.000866 | 0.000293  | 0.000113  | 0.000292  | 0.000061  | 0.000408  | -0.001754 | 0.000691  | -0.000456 | 0.000578  |
| 99  | 0.000900  | -0.000756 | -0.000403 | 0.000297  | -0.000022 | -0.000080 | -0.000122 | -0.000031 | -0.012658 | -0.001211 | -0.000859 | 0.000827  |
| 100 | 0.000753  | -0.001133 | -0.000535 | 0.000205  | -0.000196 | -0.000132 | -0.000182 | -0.000017 | 0.000643  | 0.001652  | -0.002260 | 0.002053  |
| 101 | 0.000006  | -0.000068 | -0.000264 | -0.000015 | -0.000024 | -0.000034 | -0.000050 | 0.000037  | 0.003133  | -0.002371 | 0.001385  | -0.001865 |
| 102 | -0.000051 | -0.000174 | -0.000220 | -0.000001 | -0.000043 | -0.000055 | -0.000039 | 0.000075  | -0.002221 | -0.003599 | 0.000600  | -0.001272 |
| 103 | -0.000091 | -0.000084 | -0.000392 | -0.000087 | -0.000052 | -0.000033 | -0.000059 | 0.000034  | -0.000351 | -0.000494 | 0.000631  | -0.000196 |
| 104 | -0.000087 | -0.000071 | -0.000376 | -0.000074 | -0.000040 | -0.000025 | -0.000049 | 0.000033  | -0.000596 | -0.000892 | 0.000546  | -0.000407 |
| 105 | -0.000110 | -0.000087 | -0.000463 | -0.000028 | -0.000061 | -0.000031 | -0.000062 | 0.000001  | -0.000198 | -0.000085 | 0.000088  | -0.000037 |
| 106 | -0.000097 | -0.000067 | -0.000486 | -0.000029 | -0.000054 | -0.000035 | -0.000047 | -0.000009 | -0.000256 | -0.000080 | 0.000097  | -0.000083 |
| 107 | -0.000137 | 0.000054  | -0.000437 | 0.000000  | -0.000067 | -0.000048 | -0.000056 | 0.000036  | -0.000272 | -0.000110 | 0.000026  | -0.000013 |
| 108 | -0.000155 | 0.000087  | -0.000378 | -0.000030 | -0.000055 | -0.000035 | -0.000045 | 0.000039  | -0.000289 | -0.000117 | 0.000022  | 0.000004  |
| 109 | 0.013181  | -0.005913 | 0.013450  | 0.005712  | 0.002608  | 0.000244  | 0.000977  | 0.000811  | 0.000823  | 0.000028  | -0.000194 | -0.000266 |
| 110 | -0.016462 | 0.018136  | -0.004917 | -0.001080 | 0.000585  | 0.000629  | 0.001994  | 0.003047  | 0.000827  | 0.000353  | 0.000142  | -0.000072 |
| 111 | -0.000358 | 0.000478  | -0.000186 | 0.000284  | -0.000003 | -0.000082 | -0.000042 | 0.000031  | 0.013529  | -0.003436 | 0.008153  | -0.010284 |
| 112 | 0.000208  | 0.000067  | 0.001172  | 0.000051  | 0.000035  | -0.000070 | 0.000052  | -0.000052 | -0.005881 | 0.016311  | -0.011956 | 0.006396  |
| 113 | -0.000512 | 0.000341  | -0.000699 | 0.000138  | -0.000054 | -0.000055 | -0.000015 | -0.000010 | 0.000630  | 0.000335  | -0.000125 | -0.000192 |
| 114 | 0.000332  | 0.000092  | 0.000571  | -0.000053 | 0.000116  | 0.000026  | 0.000075  | 0.000132  | 0.000499  | 0.000387  | 0.000235  | 0.000401  |
| 115 | -0.000214 | 0.000656  | -0.000422 | 0.000022  | -0.000046 | 0.000030  | -0.000048 | 0.000107  | 0.000005  | 0.000043  | -0.000371 | -0.000294 |
| 116 | 0.000098  | 0.000262  | 0.001094  | -0.000034 | 0.000045  | -0.000126 | 0.000055  | 0.000325  | 0.000148  | 0.000292  | 0.000372  | 0.000153  |
| 117 | -0.000090 | 0.000034  | 0.001347  | -0.000502 | -0.000044 | 0.000289  | 0.000178  | -0.000169 | -0.000417 | -0.000265 | -0.000511 | -0.000106 |
| 118 | -0.000129 | 0.000039  | 0.000632  | -0.000434 | -0.000036 | 0.000154  | 0.000089  | -0.000054 | -0.000212 | -0.000166 | -0.000139 | 0.000126  |

|     |           |           |           |           |           |           |           |           |           |           |           |           |
|-----|-----------|-----------|-----------|-----------|-----------|-----------|-----------|-----------|-----------|-----------|-----------|-----------|
| 119 | -0.000084 | 0.000215  | 0.000694  | -0.000353 | 0.000066  | 0.000208  | 0.000155  | -0.000079 | -0.000053 | -0.000032 | -0.000316 | -0.000016 |
| 120 | -0.000032 | -0.000205 | 0.000045  | -0.000119 | -0.000189 | -0.000048 | -0.000034 | 0.000080  | -0.000099 | -0.000183 | -0.000007 | 0.000084  |
| 121 | 0.000009  | 0.000104  | 0.000001  | 0.000074  | 0.000094  | 0.000028  | 0.000020  | -0.000044 | 0.000044  | 0.000129  | -0.000008 | -0.000077 |
| 122 | 0.000025  | 0.000102  | -0.000042 | 0.000047  | 0.000095  | 0.000020  | 0.000015  | -0.000034 | 0.000056  | 0.000053  | 0.000018  | -0.000005 |
| 123 | -0.000058 | -0.000066 | -0.000045 | -0.000025 | -0.000070 | 0.000027  | -0.000013 | 0.000055  | -0.000039 | -0.000158 | 0.000061  | 0.000062  |
| 124 | 0.000006  | -0.000101 | 0.000133  | 0.000067  | -0.000017 | 0.000042  | 0.000024  | 0.000019  | -0.000072 | 0.000060  | -0.000077 | -0.000070 |
| 125 | 0.000048  | 0.000165  | -0.000096 | 0.000182  | 0.000088  | -0.000070 | -0.000012 | -0.000077 | 0.000110  | 0.000100  | 0.000012  | 0.000005  |
| 126 | -0.000143 | 0.000617  | 0.000538  | -0.000477 | 0.000300  | 0.000203  | 0.000166  | -0.000253 | 0.000165  | 0.000005  | -0.000090 | 0.000282  |
| 127 | -0.000071 | 0.000176  | 0.000206  | -0.000504 | 0.000062  | 0.000167  | 0.000100  | -0.000005 | 0.000025  | -0.000018 | -0.000011 | 0.000243  |
| 128 | 0.000012  | -0.000056 | -0.000029 | -0.000002 | -0.000084 | -0.000049 | -0.000009 | 0.000016  | -0.000008 | -0.000037 | 0.000003  | 0.000024  |
| 129 | 0.000006  | 0.000043  | 0.000033  | 0.000047  | 0.000052  | 0.000019  | 0.000009  | -0.000015 | -0.000005 | 0.000037  | 0.000014  | 0.000006  |
| 130 | -0.000004 | 0.000054  | 0.000017  | 0.000022  | 0.000062  | 0.000003  | 0.000008  | -0.000038 | -0.000020 | 0.000068  | -0.000017 | -0.000044 |
| 131 | 0.000036  | -0.000027 | 0.000075  | -0.000071 | -0.000048 | 0.000045  | 0.000026  | 0.000060  | -0.000010 | -0.000009 | 0.000023  | -0.000005 |
| 132 | -0.000085 | 0.000024  | -0.000092 | -0.000045 | 0.000058  | -0.000029 | -0.000032 | -0.000047 | 0.000053  | -0.000017 | -0.000001 | 0.000034  |
| 133 | 0.000034  | -0.000039 | -0.000004 | 0.000045  | -0.000041 | 0.000011  | -0.000001 | 0.000025  | -0.000009 | -0.000044 | -0.000021 | -0.000013 |
| 134 | 0.001023  | -0.001491 | -0.004108 | 0.000265  | 0.000078  | -0.000022 | -0.000158 | 0.000311  | -0.001174 | 0.000034  | -0.000079 | 0.000049  |
| 135 | -0.000541 | -0.000011 | -0.004577 | 0.000143  | 0.000138  | 0.000031  | -0.000346 | -0.000171 | -0.000575 | 0.000290  | -0.000120 | 0.000240  |
| 136 | 0.000681  | -0.001022 | -0.002330 | 0.000516  | 0.000104  | 0.000015  | -0.000288 | -0.001152 | -0.000630 | 0.000225  | -0.000067 | 0.000269  |
| 137 | 0.000859  | -0.001948 | -0.001076 | 0.000740  | 0.000200  | 0.000042  | -0.000142 | -0.001309 | -0.000773 | -0.000037 | 0.000052  | 0.000032  |
| 138 | -0.002555 | 0.001937  | -0.001955 | 0.000349  | -0.000197 | -0.000249 | 0.000000  | -0.000157 | -0.001590 | -0.000155 | -0.000019 | 0.000207  |
| 139 | -0.001382 | -0.000713 | -0.003680 | -0.001125 | 0.000017  | -0.000191 | -0.000301 | -0.000274 | -0.003651 | -0.000623 | 0.000309  | 0.000060  |
| 140 | -0.004151 | 0.002821  | 0.005444  | -0.002214 | -0.000358 | 0.000132  | 0.000378  | -0.000588 | -0.003344 | 0.000294  | -0.000473 | 0.000728  |
| 141 | 0.001087  | -0.000627 | 0.000509  | 0.001285  | 0.000080  | -0.000070 | 0.000022  | -0.000368 | -0.001028 | -0.000765 | 0.000914  | -0.000086 |
| 142 | -0.000768 | -0.000526 | -0.002448 | 0.000818  | 0.000127  | -0.000164 | -0.000149 | -0.000485 | 0.000113  | -0.002093 | 0.001241  | -0.000938 |
| 143 | -0.001889 | -0.000086 | -0.004220 | -0.000438 | 0.000217  | -0.000208 | -0.000336 | -0.000218 | -0.003074 | 0.001998  | -0.001498 | 0.003815  |
| 144 | -0.000524 | -0.000170 | -0.001276 | -0.000423 | -0.000022 | 0.000005  | -0.000117 | -0.000020 | 0.000589  | -0.000563 | -0.000455 | -0.001762 |
| 145 | -0.000706 | -0.000298 | -0.002243 | -0.000397 | 0.000047  | 0.000055  | -0.000160 | -0.000133 | 0.002597  | 0.002776  | -0.003485 | 0.001605  |
| 146 | -0.000088 | -0.000104 | -0.000649 | -0.000022 | 0.000009  | -0.000014 | -0.000040 | -0.000053 | -0.002339 | -0.001420 | 0.000750  | -0.001252 |
| 147 | -0.000047 | 0.000065  | 0.000546  | -0.000182 | 0.000004  | 0.000012  | 0.000049  | 0.000057  | -0.003085 | -0.001490 | 0.000015  | -0.002167 |
| 148 | -0.000334 | -0.000188 | -0.000184 | -0.000290 | 0.000013  | 0.000021  | 0.000022  | 0.000034  | -0.000975 | 0.000055  | -0.000581 | -0.000565 |
| 149 | 0.000073  | -0.000145 | -0.001716 | 0.000211  | -0.000033 | 0.000028  | -0.000038 | 0.000196  | -0.000528 | 0.000142  | -0.000263 | 0.000048  |
| 150 | 0.000071  | 0.000097  | 0.000010  | -0.000049 | -0.000048 | 0.000017  | 0.000011  | 0.000169  | -0.000684 | -0.000202 | -0.000544 | -0.000186 |
| 151 | 0.000137  | 0.000208  | 0.000096  | 0.000004  | -0.000059 | 0.000013  | 0.000006  | 0.000198  | -0.000549 | -0.000250 | -0.000227 | -0.000227 |
| 152 | 0.000102  | 0.000005  | -0.000455 | 0.000022  | -0.000076 | -0.000002 | -0.000067 | 0.000104  | -0.000258 | 0.000159  | -0.000285 | 0.000059  |
| 153 | -0.000170 | 0.000023  | -0.001904 | 0.000025  | -0.000030 | 0.000007  | -0.000109 | 0.000070  | -0.000335 | 0.000318  | -0.000172 | 0.000113  |
| 154 | -0.012028 | 0.006698  | -0.003098 | -0.001850 | -0.000256 | 0.000032  | 0.000349  | 0.000920  | -0.001397 | 0.000242  | -0.000495 | 0.000153  |
| 155 | -0.000932 | -0.000174 | -0.002281 | -0.000195 | 0.000035  | -0.000063 | -0.000183 | -0.000080 | -0.000691 | 0.007157  | -0.011055 | 0.009204  |
| 156 | -0.000241 | -0.000225 | -0.000664 | -0.000142 | -0.000007 | 0.000016  | -0.000015 | 0.000140  | -0.000766 | -0.000019 | -0.000443 | -0.000145 |
| 157 | -0.000482 | 0.000027  | -0.002904 | 0.000212  | 0.000040  | -0.000007 | -0.000134 | -0.000128 | -0.000924 | 0.000247  | -0.000236 | 0.000084  |
| 158 | 0.000097  | 0.000019  | 0.000215  | 0.000079  | -0.000013 | 0.000046  | 0.000042  | 0.000071  | -0.000038 | -0.000007 | -0.000079 | -0.000202 |
| 159 | -0.000565 | -0.000252 | -0.001295 | -0.000449 | 0.000244  | -0.000176 | -0.000210 | -0.000535 | -0.000289 | 0.000237  | -0.000475 | -0.000619 |
| 160 | -0.000547 | -0.000244 | -0.001180 | -0.000378 | 0.000222  | -0.000178 | -0.000195 | -0.000491 | -0.000167 | 0.000217  | -0.000416 | -0.000431 |
| 161 | -0.000150 | -0.000094 | -0.000198 | 0.000047  | 0.000038  | -0.000081 | -0.000064 | -0.000094 | -0.000001 | 0.000086  | 0.000075  | 0.000103  |
| 162 | 0.000047  | 0.000081  | -0.000027 | 0.000020  | 0.000010  | 0.000009  | 0.000003  | 0.000024  | 0.000076  | -0.000042 | 0.000058  | -0.000045 |
| 163 | -0.000602 | -0.000166 | -0.000974 | -0.000377 | 0.000154  | -0.000316 | -0.000265 | -0.000482 | 0.000006  | 0.000304  | 0.000444  | 0.000573  |
| 164 | 0.000802  | -0.001354 | -0.003165 | 0.000272  | 0.000064  | -0.000043 | -0.000206 | -0.000499 | -0.000787 | 0.000312  | -0.000134 | 0.000399  |
| 165 | -0.000398 | 0.000540  | 0.000766  | -0.000259 | -0.000030 | -0.000032 | 0.000201  | 0.001256  | 0.000129  | 0.000044  | 0.000038  | -0.000089 |
| 166 | 0.001922  | -0.001343 | 0.001093  | 0.000057  | 0.000114  | 0.000220  | -0.000442 | -0.001652 | 0.001389  | 0.000072  | -0.000074 | -0.000113 |
| 167 | 0.002139  | 0.000552  | 0.007815  | -0.001260 | -0.000601 | 0.000319  | 0.000375  | 0.000805  | 0.000010  | -0.001077 | 0.000767  | -0.001633 |
| 168 | -0.001180 | 0.000070  | -0.001424 | 0.000651  | 0.000134  | -0.000107 | -0.000004 | -0.000550 | 0.001702  | 0.000378  | -0.000881 | -0.000814 |

|     |           |           |           |           |           |           |           |           |           |           |           |           |
|-----|-----------|-----------|-----------|-----------|-----------|-----------|-----------|-----------|-----------|-----------|-----------|-----------|
| 169 | -0.000488 | 0.001192  | 0.002440  | -0.000615 | 0.000072  | 0.000129  | 0.000201  | -0.000035 | -0.003074 | 0.000396  | 0.001158  | 0.001586  |
| 170 | 0.000687  | 0.000694  | 0.002859  | 0.000283  | -0.000079 | 0.000095  | 0.000171  | 0.000228  | -0.006559 | -0.000142 | -0.001957 | -0.000367 |
| 171 | 0.000181  | 0.000214  | 0.000950  | 0.000037  | -0.000012 | 0.000018  | 0.000062  | 0.000076  | -0.003573 | -0.001401 | -0.000356 | -0.001577 |
| 172 | 0.000293  | 0.000160  | -0.000031 | 0.000341  | -0.000021 | -0.000005 | -0.000023 | -0.000030 | 0.001179  | 0.001254  | -0.000699 | 0.001942  |
| 173 | 0.000134  | 0.000125  | 0.000417  | -0.000006 | -0.000111 | 0.000017  | 0.000017  | 0.000335  | -0.000880 | -0.000400 | -0.000451 | -0.000313 |
| 174 | 0.000079  | -0.000001 | 0.000072  | 0.000000  | -0.000005 | -0.000005 | -0.000007 | -0.000013 | 0.000005  | 0.000089  | -0.000080 | 0.000039  |
| 175 | -0.000111 | 0.000009  | 0.000820  | -0.000019 | 0.000117  | -0.000001 | 0.000104  | -0.000186 | 0.000402  | -0.000254 | 0.000352  | -0.000063 |
| 176 | 0.003621  | -0.000070 | -0.006345 | -0.000574 | 0.000905  | 0.000223  | -0.000615 | 0.001033  | 0.001283  | -0.000386 | 0.000147  | -0.000794 |
| 177 | -0.000319 | 0.000243  | 0.007085  | 0.002229  | -0.001127 | 0.000010  | 0.000631  | -0.000319 | 0.002696  | -0.000741 | 0.000263  | -0.001567 |
| 178 | -0.002382 | -0.000080 | -0.005004 | -0.000929 | 0.000184  | -0.000227 | -0.000301 | -0.000725 | -0.016543 | -0.001220 | 0.004539  | 0.001698  |
| 179 | -0.000499 | 0.000311  | 0.001951  | -0.000620 | 0.000051  | 0.000057  | 0.000113  | 0.000240  | 0.013408  | 0.001633  | -0.002542 | 0.001347  |
| 180 | 0.000323  | 0.000382  | 0.002792  | -0.000231 | -0.000068 | 0.000034  | 0.000153  | 0.000196  | -0.000608 | 0.000347  | -0.001647 | -0.000213 |
| 181 | -0.000265 | -0.000226 | -0.001638 | 0.000034  | -0.000042 | -0.000027 | -0.000189 | -0.000072 | -0.000112 | 0.000613  | -0.000501 | 0.000420  |
| 182 | -0.000195 | -0.000373 | 0.000220  | 0.000022  | -0.000063 | -0.000077 | -0.000080 | -0.000364 | 0.001141  | 0.000503  | 0.000150  | 0.000526  |
| 183 | 0.000618  | -0.000486 | 0.000824  | 0.000282  | 0.000159  | 0.000051  | 0.000238  | -0.000191 | -0.000990 | -0.000240 | 0.000008  | -0.000221 |
| 184 | -0.000512 | -0.000239 | -0.001381 | -0.000445 | 0.000262  | -0.000145 | -0.000182 | -0.000500 | -0.000295 | 0.000297  | -0.000340 | -0.000241 |
| 185 | -0.000689 | -0.000330 | -0.001561 | -0.000549 | 0.000257  | -0.000204 | -0.000251 | -0.000617 | -0.000276 | 0.000107  | -0.000568 | -0.000570 |
| 186 | 0.000149  | 0.000017  | 0.000266  | 0.000091  | -0.000075 | 0.000065  | 0.000067  | 0.000107  | 0.000050  | -0.000035 | -0.000018 | -0.000041 |
| 187 | 0.000696  | 0.000417  | 0.001577  | 0.000480  | -0.000199 | 0.000207  | 0.000238  | 0.000627  | 0.000165  | -0.000133 | 0.000570  | 0.000473  |
| 188 | 0.000377  | 0.000146  | 0.001163  | 0.000434  | -0.000251 | 0.000089  | 0.000139  | 0.000403  | 0.000358  | -0.000245 | 0.000366  | 0.000400  |
| 189 | 0.000023  | 0.000053  | -0.000058 | 0.000012  | 0.000019  | -0.000010 | -0.000014 | -0.000030 | 0.000019  | 0.000004  | 0.000003  | 0.000010  |
| 190 | 1.190200  | 0.087974  | 0.243910  | 0.082957  | -0.010490 | -0.004713 | -0.004755 | -0.007603 | 0.000451  | 0.000120  | 0.000040  | 0.000045  |
| 191 | 0.079749  | 1.210020  | 0.086778  | 0.087309  | 0.089429  | -0.006899 | -0.005440 | -0.005386 | 0.000028  | 0.000262  | 0.000157  | -0.000046 |
| 192 | 0.221155  | 0.087161  | 1.190270  | -0.005970 | 0.091566  | 0.089660  | -0.006948 | -0.001734 | 0.000075  | 0.000091  | -0.000034 | 0.000025  |
| 193 | 5.778640  | 0.209406  | 0.054660  | -0.000920 | -0.006781 | 0.089803  | 0.090638  | -0.006622 | 0.000031  | 0.000018  | 0.000031  | 0.000046  |
| 194 | 0.209406  | 5.769170  | 0.198572  | -0.005279 | -0.005193 | -0.006699 | 0.089676  | 0.083281  | 0.000136  | 0.000185  | 0.000085  | 0.000003  |
| 195 | 0.054660  | 0.198572  | 5.548070  | -0.007934 | -0.004429 | -0.005101 | -0.010559 | 0.082901  | 0.000362  | -0.000108 | -0.000153 | 0.000124  |
| 196 | -0.000920 | -0.005279 | -0.007934 | 5.283170  | 0.009791  | 0.002395  | 0.001543  | 0.003366  | 0.000077  | 0.000010  | 0.000022  | 0.000001  |
| 197 | -0.006781 | -0.005193 | -0.004429 | 0.009791  | 5.276940  | 0.009010  | 0.002785  | 0.001477  | 0.000057  | 0.000105  | 0.000064  | 0.000029  |
| 198 | 0.089803  | -0.006699 | -0.005101 | 0.002395  | 0.009010  | 5.291320  | 0.008776  | 0.002069  | -0.000010 | 0.000053  | 0.000031  | 0.000024  |
| 199 | 0.090638  | 0.089676  | -0.010559 | 0.001543  | 0.002785  | 0.008776  | 5.284110  | 0.009027  | 0.000027  | 0.000054  | 0.000013  | 0.000002  |
| 200 | -0.006622 | 0.083281  | 0.082901  | 0.003366  | 0.001477  | 0.002069  | 0.009027  | 5.297510  | 0.000017  | -0.000086 | -0.000056 | -0.000019 |
| 201 | 0.000031  | 0.000136  | 0.000362  | 0.000077  | 0.000057  | -0.000010 | 0.000027  | 0.000017  | 5.546260  | 0.200555  | 0.057724  | 1.194020  |
| 202 | 0.000018  | 0.000185  | -0.000108 | 0.000010  | 0.000105  | 0.000053  | 0.000054  | -0.000086 | 0.200555  | 5.763440  | 0.208045  | 0.085513  |
| 203 | 0.000031  | 0.000085  | -0.000153 | 0.000022  | 0.000064  | 0.000031  | 0.000013  | -0.000056 | 0.057724  | 0.208045  | 5.772890  | 0.218834  |
| 204 | 0.000046  | 0.000003  | 0.000124  | 0.000001  | 0.000029  | 0.000024  | 0.000002  | -0.000019 | 1.194020  | 0.085513  | 0.218834  | 5.779030  |
| 205 | 0.000019  | 0.000277  | 0.000316  | -0.000003 | 0.000123  | 0.000082  | 0.000090  | -0.000013 | 0.086033  | 1.212170  | 0.080845  | 0.203970  |
| 206 | -0.000097 | 0.000053  | -0.000012 | 0.000049  | 0.000057  | -0.000018 | -0.000012 | -0.000110 | 0.243310  | 0.087957  | 1.193870  | 0.057432  |
| 207 | 0.000010  | -0.000016 | 0.000082  | 0.000033  | -0.000017 | -0.000037 | -0.000006 | 0.000024  | 0.082235  | 0.083545  | -0.006531 | -0.001628 |
| 208 | 0.000036  | 0.000142  | 0.000076  | -0.000015 | 0.000058  | 0.000061  | 0.000069  | -0.000001 | -0.010615 | 0.089747  | 0.090573  | -0.006942 |
| 209 | 0.000019  | 0.000081  | 0.000033  | -0.000011 | 0.000061  | 0.000049  | 0.000039  | -0.000017 | -0.005081 | -0.006823 | 0.089740  | 0.089790  |
| 210 | -0.000012 | 0.000097  | 0.000022  | -0.000009 | 0.000072  | 0.000051  | 0.000035  | -0.000054 | -0.004483 | -0.004960 | -0.006736 | 0.091324  |
| 211 | -0.000028 | -0.000056 | -0.000045 | 0.000016  | 0.000004  | -0.000040 | -0.000032 | -0.000007 | -0.007556 | -0.005395 | -0.001472 | -0.006529 |
| 212 | 0.000030  | 0.000230  | -0.000275 | 0.000012  | 0.000041  | 0.000029  | 0.000021  | -0.000014 | 0.000124  | 0.000202  | -0.000011 | 0.000030  |
| 213 | 0.000222  | 0.000334  | 0.000250  | -0.000018 | 0.000086  | 0.000084  | 0.000110  | -0.000028 | 0.000134  | 0.000310  | -0.000031 | 0.000071  |
| 214 | -0.000028 | 0.000029  | 0.000248  | -0.000020 | 0.000005  | 0.000023  | 0.000028  | -0.000007 | 0.000014  | -0.000013 | 0.000016  | 0.000011  |
| 215 | -0.000068 | -0.000131 | -0.000122 | -0.000012 | -0.000006 | 0.000004  | -0.000012 | 0.000008  | 0.000087  | 0.000078  | -0.000002 | 0.000083  |
| 216 | -0.000066 | 0.000164  | -0.000132 | -0.000006 | 0.000086  | 0.000067  | 0.000074  | -0.000026 | 0.000135  | 0.000233  | 0.000024  | 0.000106  |
| 217 | 0.000027  | 0.000098  | 0.000389  | 0.000007  | 0.000042  | 0.000028  | 0.000058  | 0.000020  | 0.000368  | 0.000086  | -0.000113 | 0.000137  |
| 218 | -0.000032 | -0.000006 | 0.000001  | -0.000006 | -0.000020 | -0.000004 | -0.000010 | 0.000002  | 0.000034  | -0.000002 | -0.000029 | -0.000012 |

|     |           |           |           |           |           |           |           |           |           |           |           |           |
|-----|-----------|-----------|-----------|-----------|-----------|-----------|-----------|-----------|-----------|-----------|-----------|-----------|
| 219 | -0.000001 | 0.000068  | 0.000065  | -0.000008 | 0.000025  | 0.000041  | 0.000056  | 0.000015  | 0.000033  | 0.000121  | 0.000002  | 0.000025  |
| 220 | 0.000025  | 0.000077  | 0.000045  | -0.000006 | 0.000039  | 0.000050  | 0.000039  | -0.000012 | 0.000022  | 0.000094  | 0.000023  | 0.000040  |
| 221 | -0.000003 | 0.000054  | 0.000067  | -0.000013 | 0.000044  | 0.000046  | 0.000039  | -0.000025 | 0.000043  | 0.000137  | 0.000003  | 0.000042  |
| 222 | -0.000034 | -0.000061 | 0.000039  | 0.000010  | -0.000003 | -0.000015 | -0.000017 | 0.000005  | 0.000029  | 0.000006  | -0.000012 | 0.000019  |
| 223 | 0.000118  | 0.000114  | 0.000448  | -0.000030 | 0.000027  | 0.000039  | 0.000042  | 0.000038  | 0.000403  | 0.000016  | -0.000052 | 0.000120  |
| 224 | 0.000113  | 0.000225  | 0.000044  | 0.000025  | 0.000109  | 0.000099  | 0.000130  | -0.000014 | -0.000108 | 0.000282  | 0.000009  | -0.000054 |
| 225 | -0.000019 | -0.000005 | -0.000118 | -0.000018 | 0.000008  | 0.000034  | -0.000010 | -0.000045 | -0.000102 | -0.000052 | -0.000009 | -0.000036 |
| 226 | 0.000072  | 0.000040  | 0.000213  | -0.000004 | 0.000039  | 0.000047  | 0.000021  | 0.000011  | 0.000102  | 0.000042  | 0.000007  | 0.000083  |
| 227 | 0.000119  | 0.000222  | 0.000405  | -0.000081 | 0.000071  | 0.000078  | 0.000100  | 0.000034  | 0.000210  | 0.000253  | 0.000149  | -0.000040 |
| 228 | 0.000133  | 0.000298  | 0.000146  | 0.000016  | 0.000061  | 0.000046  | 0.000050  | 0.000088  | -0.000006 | 0.000059  | -0.000060 | 0.000008  |
| 229 | 0.000001  | -0.000068 | 0.000007  | 0.000026  | -0.000018 | -0.000012 | -0.000036 | -0.000001 | 0.000070  | -0.000050 | -0.000042 | 0.000012  |
| 230 | 0.000048  | 0.000055  | 0.000020  | -0.000010 | 0.000064  | 0.000064  | 0.000020  | -0.000050 | 0.000064  | 0.000078  | -0.000007 | 0.000026  |
| 231 | 0.000039  | 0.000079  | 0.000032  | -0.000024 | 0.000046  | 0.000060  | 0.000043  | -0.000027 | 0.000038  | 0.000048  | -0.000006 | 0.000025  |
| 232 | 0.000050  | 0.000118  | 0.000050  | -0.000054 | 0.000031  | 0.000068  | 0.000085  | -0.000005 | 0.000041  | 0.000087  | 0.000012  | 0.000012  |
| 233 | 0.000020  | 0.000025  | 0.000083  | -0.000009 | -0.000041 | -0.000005 | -0.000005 | 0.000031  | 0.000036  | -0.000031 | -0.000020 | 0.000016  |
| 234 | -0.583403 | 0.133617  | 0.568036  | -0.051167 | -0.003636 | -0.005263 | 0.008701  | -0.078607 | 0.000362  | 0.000192  | 0.000103  | 0.000098  |
| 235 | -0.570384 | 0.140214  | 0.226195  | -0.085398 | 0.008797  | -0.005099 | -0.003894 | -0.049626 | 0.000349  | 0.000283  | 0.000148  | -0.000137 |
| 236 | -0.534946 | -0.570726 | 0.136751  | 0.123604  | -0.055324 | -0.001200 | -0.005708 | 0.012921  | -0.000171 | -0.000223 | -0.000131 | -0.000003 |
| 237 | -0.569923 | -0.535281 | 0.131073  | 0.117664  | -0.065462 | 0.010210  | -0.005671 | 0.002863  | -0.000264 | -0.000008 | -0.000041 | -0.000032 |
| 238 | 0.152420  | -0.539139 | -0.549455 | -0.064240 | 0.118316  | -0.056577 | 0.000283  | -0.004391 | 0.000055  | 0.000017  | 0.000040  | 0.000012  |
| 239 | 0.155164  | -0.575170 | -0.512852 | -0.054884 | 0.120298  | -0.066156 | 0.011970  | -0.004675 | -0.000009 | -0.000037 | 0.000003  | 0.000012  |
| 240 | 0.289685  | 0.148393  | -0.515594 | 0.008307  | -0.067006 | 0.118938  | -0.056837 | -0.002701 | 0.000027  | 0.000105  | 0.000055  | -0.000007 |
| 241 | 0.517698  | 0.149882  | -0.551983 | -0.002981 | -0.057317 | 0.118813  | -0.066550 | 0.007911  | 0.000007  | 0.000110  | 0.000065  | -0.000015 |
| 242 | 0.527987  | 0.291809  | 0.142709  | -0.004875 | 0.012158  | -0.066366 | 0.118176  | -0.053298 | -0.000091 | -0.000027 | -0.000024 | -0.000027 |
| 243 | 0.299182  | 0.521948  | 0.143802  | -0.004616 | 0.000258  | -0.056725 | 0.118665  | -0.062830 | -0.000075 | 0.000029  | -0.000004 | -0.000044 |
| 244 | 0.159215  | 0.531460  | 0.266093  | 0.003760  | -0.005525 | 0.010442  | -0.064758 | 0.109973  | -0.000079 | -0.000121 | -0.000077 | 0.000062  |
| 245 | 0.157332  | 0.302959  | 0.515196  | 0.014827  | -0.005553 | -0.001014 | -0.054375 | 0.122439  | -0.000111 | -0.000320 | -0.000138 | 0.000080  |
| 246 | -0.000046 | 0.000424  | 0.001267  | -0.000057 | 0.000150  | 0.000168  | 0.000215  | 0.000004  | 0.233506  | 0.141244  | -0.567708 | -0.586726 |
| 247 | -0.000080 | 0.000498  | -0.000652 | 0.000033  | 0.000195  | 0.000071  | 0.000097  | -0.000122 | 0.556183  | 0.133865  | -0.581974 | -0.564715 |
| 248 | -0.000015 | -0.000404 | -0.000396 | 0.000044  | -0.000139 | -0.000132 | -0.000159 | 0.000002  | 0.514182  | 0.302695  | 0.156630  | -0.532134 |
| 249 | 0.000043  | -0.000223 | -0.000390 | 0.000004  | -0.000061 | -0.000057 | -0.000081 | -0.000033 | 0.266221  | 0.531185  | 0.158456  | -0.566883 |
| 250 | 0.000014  | 0.000036  | 0.000157  | -0.000017 | -0.000009 | 0.000009  | 0.000024  | 0.000040  | 0.145065  | 0.520236  | 0.298414  | 0.151374  |
| 251 | 0.000033  | -0.000034 | 0.000122  | 0.000014  | -0.000030 | -0.000008 | -0.000005 | 0.000047  | 0.143923  | 0.289877  | 0.526741  | 0.154268  |
| 252 | 0.000013  | 0.000156  | 0.000035  | -0.000017 | 0.000066  | 0.000057  | 0.000056  | -0.000012 | -0.552833 | 0.150140  | 0.517081  | 0.290016  |
| 253 | 0.000012  | 0.000162  | 0.000058  | -0.000020 | 0.000066  | 0.000062  | 0.000065  | -0.000008 | -0.516479 | 0.148597  | 0.288804  | 0.518561  |
| 254 | -0.000014 | -0.000061 | -0.000208 | -0.000013 | -0.000005 | -0.000007 | -0.000031 | -0.000054 | -0.512532 | -0.574649 | 0.154397  | 0.526227  |
| 255 | -0.000048 | -0.000008 | -0.000131 | -0.000004 | 0.000010  | 0.000001  | -0.000011 | -0.000053 | -0.549281 | -0.538638 | 0.151719  | 0.298268  |
| 256 | 0.000069  | -0.000182 | 0.000112  | 0.000013  | -0.000082 | -0.000052 | -0.000047 | 0.000090  | 0.133219  | -0.534478 | -0.568773 | 0.156727  |
| 257 | 0.000021  | -0.000366 | 0.000028  | 0.000020  | -0.000161 | -0.000113 | -0.000124 | 0.000097  | 0.138683  | -0.570181 | -0.533776 | 0.155121  |
| 258 | -0.000118 | 0.000311  | -0.000706 | 0.000041  | 0.000169  | 0.000115  | 0.000114  | -0.000002 | 0.000524  | 0.000368  | -0.000063 | 0.000156  |
| 259 | 0.000427  | 0.000723  | 0.000998  | -0.000027 | 0.000185  | 0.000148  | 0.000226  | -0.000056 | -0.000044 | 0.000572  | -0.000061 | 0.000117  |
| 260 | 0.000047  | -0.000201 | 0.000015  | 0.000007  | -0.000126 | -0.000102 | -0.000134 | 0.000006  | -0.000192 | -0.000368 | 0.000031  | -0.000142 |
| 261 | 0.000033  | -0.000135 | 0.000129  | -0.000017 | -0.000072 | -0.000049 | -0.000057 | -0.000007 | -0.000096 | -0.000190 | 0.000033  | -0.000114 |
| 262 | -0.000092 | -0.000090 | -0.000083 | -0.000005 | -0.000010 | -0.000001 | 0.000006  | 0.000011  | -0.000019 | 0.000034  | -0.000019 | 0.000020  |
| 263 | -0.000086 | -0.000132 | -0.000119 | 0.000005  | -0.000024 | -0.000016 | -0.000023 | 0.000025  | -0.000024 | -0.000039 | 0.000008  | 0.000016  |
| 264 | 0.000072  | 0.000175  | 0.000026  | -0.000004 | 0.000062  | 0.000050  | 0.000058  | -0.000015 | 0.000022  | 0.000136  | 0.000014  | 0.000031  |
| 265 | 0.000070  | 0.000172  | -0.000011 | -0.000002 | 0.000053  | 0.000044  | 0.000047  | -0.000018 | 0.000027  | 0.000129  | 0.000009  | 0.000032  |
| 266 | 0.000014  | -0.000032 | 0.000166  | -0.000008 | -0.000018 | -0.000013 | -0.000013 | -0.000006 | -0.000039 | -0.000068 | 0.000007  | -0.000029 |
| 267 | 0.000013  | 0.000000  | 0.000170  | -0.000006 | 0.000010  | 0.000005  | 0.000009  | -0.000013 | 0.000013  | 0.000019  | -0.000010 | -0.000008 |
| 268 | -0.000235 | -0.000402 | -0.000218 | -0.000009 | -0.000088 | -0.000066 | -0.000086 | 0.000024  | -0.000093 | -0.000204 | 0.000040  | -0.000022 |



|     |           |           |           |           |           |           |           |           |           |           |           |           |
|-----|-----------|-----------|-----------|-----------|-----------|-----------|-----------|-----------|-----------|-----------|-----------|-----------|
| 269 | -0.000146 | -0.000387 | -0.000365 | 0.000025  | -0.000140 | -0.000115 | -0.000148 | 0.000051  | -0.000079 | -0.000388 | 0.000010  | -0.000057 |
| 270 | 0.000168  | 0.000411  | 0.000906  | -0.000200 | 0.000164  | 0.000083  | 0.000167  | 0.000063  | 0.000715  | 0.000549  | 0.000258  | 0.000075  |
| 271 | 0.000203  | 0.000308  | -0.000086 | 0.000089  | 0.000173  | 0.000170  | 0.000266  | -0.000012 | -0.000395 | 0.000400  | -0.000062 | -0.000172 |
| 272 | -0.000143 | -0.000238 | -0.000468 | 0.000055  | -0.000144 | -0.000101 | -0.000151 | -0.000002 | -0.000154 | -0.000482 | -0.000191 | 0.000059  |
| 273 | -0.000136 | -0.000097 | -0.000332 | 0.000040  | -0.000087 | -0.000057 | -0.000081 | -0.000015 | -0.000158 | -0.000304 | -0.000150 | 0.000044  |
| 274 | 0.000021  | -0.000082 | 0.000114  | 0.000005  | 0.000007  | -0.000005 | -0.000012 | -0.000020 | 0.000086  | 0.000049  | 0.000026  | 0.000014  |
| 275 | 0.000003  | -0.000112 | 0.000059  | 0.000001  | -0.000006 | -0.000014 | -0.000046 | -0.000025 | 0.000042  | 0.000026  | 0.000059  | 0.000001  |
| 276 | 0.000042  | 0.000125  | 0.000057  | -0.000012 | 0.000064  | 0.000057  | 0.000077  | -0.000010 | -0.000080 | 0.000234  | 0.000103  | -0.000088 |
| 277 | 0.000047  | 0.000121  | 0.000069  | -0.000015 | 0.000065  | 0.000053  | 0.000079  | 0.000001  | -0.000048 | 0.000206  | 0.000092  | -0.000065 |
| 278 | -0.000055 | -0.000070 | -0.000147 | -0.000001 | -0.000032 | -0.000016 | -0.000025 | -0.000007 | -0.000027 | -0.000173 | -0.000099 | 0.000057  |
| 279 | -0.000033 | 0.000030  | -0.000099 | -0.000026 | -0.000015 | -0.000004 | 0.000022  | -0.000004 | 0.000011  | -0.000127 | -0.000112 | 0.000060  |
| 280 | -0.000049 | -0.000161 | -0.000024 | 0.000016  | -0.000069 | -0.000047 | -0.000098 | 0.000003  | 0.000049  | -0.000159 | 0.000025  | 0.000030  |
| 281 | -0.000069 | -0.000237 | -0.000051 | 0.000048  | -0.000120 | -0.000118 | -0.000198 | 0.000029  | -0.000040 | -0.000219 | 0.000049  | -0.000015 |
| 282 | -0.005180 | 0.002429  | -0.004045 | -0.001931 | -0.000388 | 0.000164  | -0.000142 | 0.000929  | -0.000068 | 0.000146  | 0.000215  | 0.000062  |
| 283 | 0.000814  | -0.003855 | -0.006786 | -0.000290 | 0.000112  | 0.000014  | -0.000084 | -0.001389 | 0.000026  | 0.000162  | 0.000062  | -0.000036 |
| 284 | 0.001090  | 0.000457  | 0.000327  | -0.000080 | -0.000120 | -0.000394 | 0.000018  | -0.000289 | 0.000007  | -0.000057 | 0.000003  | -0.000019 |
| 285 | -0.000213 | 0.000736  | 0.001380  | 0.000661  | -0.000143 | -0.000388 | 0.000354  | -0.000191 | -0.000029 | -0.000067 | -0.000016 | -0.000007 |
| 286 | 0.000335  | 0.002636  | 0.004557  | 0.000377  | 0.000449  | 0.000107  | 0.000245  | 0.000048  | -0.000101 | -0.000097 | -0.000061 | -0.000022 |
| 287 | 0.002259  | 0.002160  | 0.001777  | -0.001742 | 0.000173  | -0.000110 | -0.000016 | -0.000603 | -0.000148 | -0.000102 | -0.000031 | -0.000086 |
| 288 | -0.000178 | 0.000119  | -0.000273 | 0.000093  | -0.000023 | -0.000004 | -0.000049 | 0.000051  | 0.004985  | 0.000103  | -0.002927 | -0.002313 |
| 289 | -0.000067 | 0.000056  | -0.000018 | 0.000034  | 0.000038  | 0.000007  | -0.000011 | -0.000013 | 0.001030  | 0.001554  | 0.001833  | 0.002492  |
| 290 | 0.000005  | -0.000022 | 0.000004  | -0.000009 | -0.000020 | -0.000008 | 0.000009  | 0.000010  | -0.003762 | -0.002715 | 0.000700  | 0.000718  |
| 291 | -0.000015 | -0.000046 | -0.000035 | -0.000016 | -0.000033 | -0.000008 | 0.000003  | -0.000002 | -0.001726 | -0.000930 | 0.001063  | 0.001453  |
| 292 | -0.000001 | -0.000074 | -0.000034 | -0.000025 | -0.000031 | -0.000010 | 0.000004  | -0.000001 | -0.002286 | -0.001415 | -0.000428 | -0.000615 |
| 293 | -0.000020 | -0.000080 | -0.000053 | -0.000037 | -0.000002 | -0.000002 | 0.000008  | -0.000015 | -0.006044 | -0.006465 | -0.000980 | 0.003099  |
| 294 | -0.000196 | 0.000146  | -0.000126 | 0.000059  | -0.000067 | -0.000032 | -0.000016 | -0.000057 | -0.000122 | 0.000005  | -0.000146 | -0.000186 |
| 295 | -0.000045 | -0.000042 | -0.000060 | 0.000012  | -0.000031 | -0.000016 | -0.000016 | -0.000016 | 0.000040  | 0.000045  | -0.000020 | -0.000046 |
| 296 | 0.000021  | -0.000019 | -0.000011 | -0.000003 | 0.000009  | 0.000001  | 0.000003  | 0.000011  | -0.000064 | -0.000089 | -0.000011 | -0.000009 |
| 297 | 0.000005  | 0.000000  | 0.000015  | 0.000003  | 0.000007  | -0.000002 | 0.000007  | 0.000014  | -0.000007 | -0.000081 | -0.000031 | -0.000001 |
| 298 | 0.000028  | 0.000033  | 0.000036  | -0.000003 | 0.000022  | 0.000006  | 0.000016  | 0.000015  | -0.000015 | -0.000036 | 0.000002  | 0.000016  |
| 299 | 0.000023  | -0.000049 | -0.000015 | -0.000013 | 0.000008  | 0.000000  | -0.000003 | 0.000014  | -0.000049 | -0.000112 | 0.000008  | 0.000029  |
| 300 | 0.000141  | -0.000188 | 0.000339  | 0.000032  | 0.000023  | -0.000058 | 0.000045  | 0.000080  | -0.000247 | 0.000115  | 0.000239  | 0.000090  |
| 301 | 0.000057  | 0.000114  | 0.000181  | -0.000005 | 0.000002  | -0.000027 | 0.000030  | 0.000050  | -0.000111 | 0.000030  | 0.000060  | 0.000014  |
| 302 | -0.000054 | -0.000094 | -0.000106 | 0.000008  | -0.000024 | -0.000007 | -0.000038 | -0.000029 | 0.000007  | -0.000032 | -0.000020 | -0.000009 |
| 303 | -0.000016 | -0.000046 | -0.000079 | -0.000004 | -0.000015 | -0.000006 | -0.000025 | -0.000015 | 0.000001  | 0.000000  | -0.000010 | -0.000005 |
| 304 | -0.000026 | -0.000052 | -0.000056 | -0.000019 | -0.000017 | 0.000002  | -0.000014 | -0.000007 | 0.000038  | 0.000025  | -0.000011 | -0.000025 |
| 305 | -0.000027 | -0.000006 | -0.000164 | -0.000027 | -0.000042 | -0.000002 | -0.000024 | -0.000009 | 0.000027  | -0.000059 | -0.000034 | -0.000040 |
| 306 | -0.002347 | 0.008989  | -0.045955 | 0.007936  | 0.001130  | -0.000031 | -0.000024 | 0.003338  | -0.000003 | 0.000488  | 0.000081  | -0.000263 |
| 307 | 0.000195  | -0.000813 | -0.002248 | -0.001082 | 0.000356  | 0.000098  | -0.000132 | 0.000585  | -0.000118 | 0.000064  | 0.000082  | -0.000007 |
| 308 | -0.002845 | -0.000506 | -0.000250 | 0.000644  | -0.000292 | -0.000001 | -0.000221 | -0.000351 | 0.000060  | -0.000010 | 0.000036  | 0.000008  |
| 309 | 0.000871  | -0.001019 | 0.001222  | -0.000337 | -0.000284 | -0.000185 | 0.000341  | 0.000184  | 0.000011  | 0.000025  | -0.000005 | 0.000015  |
| 310 | -0.001639 | 0.002045  | 0.001580  | 0.000569  | 0.000245  | -0.000017 | 0.000028  | 0.000185  | 0.000010  | -0.000019 | -0.000006 | 0.000031  |
| 311 | 0.004578  | -0.003516 | -0.000964 | -0.000176 | 0.000003  | 0.000019  | -0.000781 | 0.001050  | 0.000030  | -0.000014 | 0.000005  | -0.000029 |
| 312 | -0.000270 | 0.001459  | 0.002410  | 0.000361  | -0.000016 | 0.000055  | 0.000773  | -0.001625 | 0.000008  | -0.000044 | -0.000110 | -0.000018 |
| 313 | -0.000117 | -0.000185 | -0.000175 | 0.000025  | 0.000047  | -0.000024 | -0.000042 | -0.000006 | -0.039675 | 0.009049  | -0.004458 | -0.001469 |
| 314 | -0.000092 | 0.000051  | -0.000190 | 0.000003  | -0.000023 | 0.000002  | -0.000022 | 0.000000  | 0.000582  | 0.005180  | -0.000363 | 0.001460  |
| 315 | -0.000050 | -0.000014 | -0.000018 | 0.000023  | -0.000012 | -0.000012 | -0.000014 | 0.000002  | 0.001669  | -0.004133 | 0.001794  | -0.004858 |
| 316 | 0.000036  | 0.000036  | 0.000050  | 0.000015  | 0.000010  | 0.000006  | 0.000015  | 0.000026  | 0.000514  | 0.001804  | -0.002460 | -0.002119 |
| 317 | 0.000021  | -0.000018 | -0.000024 | -0.000019 | -0.000016 | -0.000001 | -0.000008 | -0.000012 | -0.001897 | -0.000714 | 0.002725  | -0.000342 |
| 318 | -0.000012 | 0.000020  | 0.000026  | -0.000004 | 0.000008  | -0.000001 | 0.000003  | -0.000007 | -0.002219 | -0.002464 | 0.001398  | 0.003963  |

|     |           |           |           |           |           |           |           |           |           |           |           |           |
|-----|-----------|-----------|-----------|-----------|-----------|-----------|-----------|-----------|-----------|-----------|-----------|-----------|
| 319 | 0.000096  | -0.000075 | 0.000149  | -0.000018 | 0.000032  | 0.000005  | 0.000025  | -0.000009 | -0.003519 | -0.001202 | 0.003784  | -0.002461 |
| 320 | -0.000206 | -0.000312 | 0.000092  | 0.000008  | 0.000010  | 0.000015  | 0.000034  | 0.000020  | -0.000298 | -0.000118 | -0.000153 | -0.000001 |
| 321 | -0.000060 | 0.000049  | -0.000004 | 0.000041  | -0.000036 | -0.000020 | -0.000007 | 0.000005  | -0.000004 | -0.000069 | -0.000136 | -0.000037 |
| 322 | -0.000051 | -0.000028 | -0.000052 | 0.000004  | -0.000015 | -0.000011 | -0.000014 | -0.000019 | -0.000032 | -0.000028 | -0.000014 | -0.000047 |
| 323 | 0.000023  | 0.000043  | 0.000004  | -0.000007 | 0.000016  | 0.000010  | 0.000016  | 0.000000  | -0.000011 | 0.000056  | 0.000034  | 0.000000  |
| 324 | 0.000003  | 0.000026  | 0.000039  | 0.000005  | 0.000000  | 0.000004  | 0.000000  | 0.000007  | 0.000006  | -0.000015 | -0.000018 | 0.000000  |
| 325 | 0.000007  | -0.000087 | -0.000017 | -0.000001 | -0.000011 | -0.000010 | -0.000016 | 0.000005  | 0.000020  | -0.000045 | -0.000020 | 0.000043  |
| 326 | 0.000079  | -0.000003 | 0.000033  | -0.000044 | 0.000047  | 0.000027  | 0.000020  | 0.000003  | 0.000021  | 0.000101  | 0.000154  | 0.000042  |
| 327 | 0.000228  | 0.000219  | -0.000064 | -0.000065 | -0.000069 | -0.000026 | 0.000041  | 0.000062  | -0.000088 | 0.000075  | 0.000071  | -0.000046 |
| 328 | 0.000061  | -0.000089 | 0.000129  | -0.000003 | 0.000011  | -0.000021 | 0.000022  | 0.000012  | -0.000130 | 0.000098  | 0.000086  | 0.000064  |
| 329 | -0.000001 | -0.000026 | 0.000019  | 0.000014  | -0.000001 | -0.000014 | -0.000006 | 0.000010  | -0.000044 | -0.000039 | 0.000029  | 0.000005  |
| 330 | -0.000005 | -0.000019 | 0.000037  | 0.000012  | -0.000001 | 0.000003  | 0.000001  | 0.000011  | 0.000020  | 0.000031  | 0.000001  | -0.000012 |
| 331 | 0.000009  | -0.000005 | -0.000056 | -0.000011 | 0.000010  | 0.000004  | -0.000008 | -0.000029 | 0.000025  | 0.000001  | -0.000003 | 0.000016  |
| 332 | -0.000041 | -0.000011 | -0.000020 | 0.000020  | 0.000003  | 0.000011  | 0.000002  | -0.000012 | -0.000015 | -0.000041 | -0.000045 | 0.000009  |
| 333 | -0.000024 | 0.000151  | -0.000113 | -0.000030 | -0.000022 | 0.000018  | -0.000011 | 0.000007  | 0.000143  | -0.000052 | -0.000070 | -0.000083 |

|    | 205       | 206       | 207       | 208       | 209       | 210       | 211       | 212       | 213       | 214       | 215       | 216       |
|----|-----------|-----------|-----------|-----------|-----------|-----------|-----------|-----------|-----------|-----------|-----------|-----------|
| 1  | -0.000631 | 0.000118  | 0.000041  | -0.000355 | -0.000171 | -0.000293 | 0.000094  | -0.000854 | -0.000364 | 0.000885  | 0.000459  | -0.000353 |
| 2  | 0.001519  | -0.000643 | 0.000181  | 0.001410  | 0.000497  | 0.000277  | -0.001009 | 0.003893  | 0.001697  | -0.003669 | -0.000521 | 0.001360  |
| 3  | 0.001867  | -0.000892 | 0.000319  | 0.000358  | 0.000226  | 0.000348  | 0.000116  | -0.000971 | 0.001838  | -0.000357 | 0.000041  | 0.000911  |
| 4  | 0.005469  | -0.012181 | 0.000294  | 0.000783  | 0.000068  | 0.000563  | 0.001634  | -0.000575 | 0.001767  | -0.000405 | -0.000488 | 0.001439  |
| 5  | -0.001945 | 0.007428  | 0.002037  | 0.000089  | 0.000106  | 0.000378  | 0.000554  | -0.012918 | 0.005698  | -0.004952 | 0.003580  | -0.003851 |
| 6  | 0.001646  | -0.000872 | -0.000116 | 0.000333  | 0.000161  | 0.000411  | 0.000398  | 0.007825  | -0.002066 | 0.003795  | -0.005348 | 0.006887  |
| 7  | 0.000153  | 0.000883  | -0.000246 | -0.000040 | 0.000008  | 0.000228  | 0.000031  | -0.000199 | 0.000058  | 0.000074  | -0.000260 | 0.000214  |
| 8  | 0.000128  | -0.001274 | -0.000232 | 0.000085  | 0.000110  | 0.000113  | -0.000239 | 0.001506  | 0.002446  | -0.000637 | 0.000846  | 0.000914  |
| 9  | 0.001489  | 0.002737  | 0.000532  | 0.000357  | 0.000166  | 0.000424  | 0.000327  | -0.000258 | -0.000194 | 0.000296  | -0.000825 | 0.000198  |
| 10 | -0.004309 | -0.005505 | 0.000408  | -0.000404 | -0.000206 | -0.000602 | 0.000110  | -0.001283 | 0.000040  | -0.000419 | 0.000800  | -0.000536 |
| 11 | 0.014133  | -0.006891 | -0.001992 | 0.001726  | 0.000460  | 0.001706  | 0.000751  | 0.002681  | 0.001269  | 0.000611  | -0.001218 | 0.002613  |
| 12 | -0.000477 | 0.025972  | 0.001331  | 0.001044  | 0.000442  | 0.001263  | -0.000879 | -0.005209 | -0.004044 | 0.001076  | -0.000789 | -0.001529 |
| 13 | -0.002566 | -0.010472 | 0.000073  | -0.000614 | -0.000173 | -0.000424 | 0.000426  | -0.007983 | 0.013560  | -0.010171 | 0.006174  | -0.004876 |
| 14 | 0.002546  | 0.001898  | 0.000108  | 0.000378  | 0.000095  | 0.000496  | 0.000417  | 0.027143  | -0.001177 | 0.005797  | -0.009493 | 0.014620  |
| 15 | -0.000418 | -0.000376 | -0.000273 | -0.000115 | 0.000077  | -0.000039 | -0.000078 | -0.010667 | -0.002414 | -0.000774 | 0.000004  | -0.003611 |
| 16 | 0.000589  | 0.000771  | 0.000338  | 0.000003  | -0.000103 | -0.000005 | 0.000083  | 0.000916  | -0.000479 | 0.000827  | -0.000756 | 0.000333  |
| 17 | -0.000434 | 0.000138  | -0.000393 | 0.000227  | 0.000290  | 0.000292  | -0.000155 | -0.000163 | 0.000565  | -0.000394 | 0.000366  | -0.000155 |
| 18 | 0.000303  | 0.000846  | 0.000214  | -0.000031 | -0.000075 | -0.000037 | 0.000019  | 0.001198  | -0.000091 | 0.000308  | -0.000237 | 0.000503  |
| 19 | -0.006733 | 0.006173  | -0.001145 | -0.000191 | 0.000321  | 0.000124  | 0.000222  | 0.000730  | 0.000459  | -0.000292 | 0.000348  | -0.000160 |
| 20 | 0.002120  | 0.004220  | 0.001835  | 0.001181  | 0.000182  | 0.000888  | 0.000522  | 0.000171  | -0.000546 | 0.000578  | -0.000354 | 0.000892  |
| 21 | 0.005583  | -0.003761 | 0.000007  | -0.000723 | -0.000738 | -0.000641 | -0.000808 | 0.000447  | 0.000451  | -0.000580 | 0.000781  | -0.000626 |
| 22 | -0.008620 | 0.016559  | -0.000533 | -0.000671 | -0.000819 | -0.000796 | 0.001031  | 0.005995  | -0.006497 | 0.003144  | -0.002022 | 0.001152  |
| 23 | 0.004315  | 0.002145  | 0.000626  | 0.000828  | 0.000250  | 0.001113  | 0.001904  | 0.004033  | 0.002296  | 0.000552  | -0.001237 | 0.003999  |
| 24 | -0.000555 | -0.005802 | 0.000012  | 0.000022  | 0.000312  | -0.000082 | -0.000952 | -0.003497 | 0.005339  | -0.006231 | 0.003519  | -0.009335 |
| 25 | -0.000461 | 0.000946  | 0.000074  | -0.000067 | -0.000084 | -0.000043 | 0.000243  | 0.017299  | -0.008902 | 0.004609  | -0.005453 | 0.004539  |
| 26 | 0.000553  | 0.000083  | -0.000215 | 0.000163  | 0.000264  | 0.000245  | -0.000331 | 0.001898  | 0.004254  | -0.001481 | -0.000245 | 0.002681  |
| 27 | -0.000212 | 0.001231  | 0.000093  | -0.000033 | -0.000117 | -0.000001 | 0.000251  | -0.006732 | -0.000293 | -0.002474 | 0.001563  | -0.005980 |
| 28 | -0.003144 | -0.002615 | -0.001037 | -0.000604 | -0.000003 | -0.000541 | -0.000414 | 0.000533  | 0.001339  | -0.001470 | 0.001322  | -0.001548 |
| 29 | 0.001478  | 0.004640  | 0.000925  | 0.000960  | 0.000240  | 0.000885  | 0.000249  | 0.001158  | -0.001945 | 0.001826  | -0.001209 | 0.001650  |
| 30 | 0.010220  | -0.039552 | 0.003205  | -0.000194 | -0.000452 | -0.000067 | 0.003732  | -0.002817 | -0.003264 | 0.000191  | 0.000221  | -0.002708 |
| 31 | -0.002663 | -0.021441 | 0.004402  | -0.000349 | -0.000498 | -0.000493 | 0.004537  | 0.004250  | 0.001513  | 0.000669  | 0.000063  | 0.003275  |
| 32 | 0.003388  | 0.006023  | 0.000617  | 0.000666  | 0.000271  | 0.000814  | 0.000875  | -0.040289 | 0.009830  | -0.012015 | 0.000741  | -0.005826 |

|    |           |           |           |           |           |           |           |           |           |           |           |           |
|----|-----------|-----------|-----------|-----------|-----------|-----------|-----------|-----------|-----------|-----------|-----------|-----------|
| 33 | -0.003079 | -0.002905 | -0.000558 | -0.000710 | -0.000068 | -0.000672 | -0.001028 | -0.021230 | -0.002934 | 0.000734  | -0.010694 | 0.010132  |
| 34 | 0.001677  | 0.000888  | -0.000040 | -0.000043 | 0.000042  | 0.000018  | -0.000247 | 0.005784  | 0.003234  | -0.000509 | -0.000446 | 0.002289  |
| 35 | -0.001800 | 0.001053  | -0.000223 | 0.000031  | 0.000023  | 0.000118  | -0.000071 | -0.003359 | -0.002941 | 0.000446  | -0.000368 | -0.002966 |
| 36 | 0.000017  | 0.000043  | -0.000026 | 0.000034  | 0.000029  | 0.000051  | -0.000005 | 0.000033  | 0.000147  | 0.000049  | -0.000017 | 0.000017  |
| 37 | 0.000077  | -0.000018 | -0.000001 | 0.000045  | 0.000042  | 0.000020  | -0.000004 | 0.000036  | 0.000010  | -0.000004 | 0.000015  | 0.000074  |
| 38 | 0.000307  | 0.000188  | 0.000026  | 0.000135  | 0.000053  | 0.000074  | -0.000009 | 0.000038  | 0.000001  | -0.000053 | 0.000052  | 0.000092  |
| 39 | -0.003653 | 0.005901  | 0.002023  | -0.000101 | -0.000160 | -0.000064 | 0.000155  | -0.000022 | 0.000073  | 0.000021  | -0.000022 | 0.000097  |
| 40 | 0.001841  | 0.000007  | 0.000336  | -0.000069 | -0.000132 | -0.000086 | 0.001844  | 0.000147  | 0.000292  | 0.000032  | -0.000028 | 0.000359  |
| 41 | 0.000374  | 0.000262  | 0.000016  | 0.000072  | 0.000047  | 0.000121  | 0.000025  | 0.005564  | -0.003518 | 0.003259  | -0.003025 | 0.002166  |
| 42 | 0.000072  | 0.000128  | 0.000005  | 0.000029  | 0.000025  | 0.000047  | 0.000019  | -0.000353 | 0.001990  | -0.003188 | 0.001921  | -0.002873 |
| 43 | 0.000027  | 0.000031  | -0.000041 | 0.000023  | 0.000025  | 0.000059  | -0.000005 | 0.000209  | 0.000379  | 0.000023  | 0.000089  | 0.000349  |
| 44 | 0.000160  | 0.000237  | 0.000021  | 0.000028  | 0.000034  | 0.000058  | -0.000059 | 0.000340  | 0.000195  | -0.000005 | 0.000017  | 0.000189  |
| 45 | -0.002187 | 0.275150  | -0.001830 | 0.003770  | 0.000496  | 0.003917  | -0.000923 | 0.000222  | 0.000187  | -0.000041 | 0.000144  | -0.000011 |
| 46 | 0.000035  | 0.000272  | -0.000052 | -0.000005 | 0.000029  | 0.000057  | -0.000019 | 0.280981  | -0.003207 | -0.017119 | -0.016961 | -0.004731 |
| 47 | 0.000037  | 0.000411  | 0.000002  | 0.000073  | 0.000018  | 0.000084  | -0.000004 | 0.000099  | -0.000020 | 0.000209  | -0.000205 | 0.000053  |
| 48 | -0.000875 | 0.000390  | 0.000076  | -0.000121 | -0.000132 | -0.000251 | 0.000420  | -0.000091 | -0.000083 | 0.000409  | 0.000430  | -0.000339 |
| 49 | 0.000591  | 0.000293  | -0.000277 | -0.000044 | -0.000063 | 0.000265  | -0.000158 | -0.000112 | 0.000094  | -0.000010 | -0.000053 | 0.000582  |
| 50 | 0.000834  | -0.000246 | -0.000072 | 0.000093  | 0.000114  | 0.000222  | 0.000218  | 0.000230  | 0.000097  | 0.000069  | 0.000648  | 0.000615  |
| 51 | 0.000371  | 0.000536  | -0.000194 | 0.000143  | 0.000141  | 0.000285  | 0.000126  | 0.000132  | 0.000363  | 0.000119  | -0.000098 | 0.000321  |
| 52 | -0.001061 | -0.000036 | 0.000153  | -0.000240 | -0.000231 | -0.000420 | 0.000049  | -0.000025 | -0.000321 | 0.000047  | -0.000037 | -0.000783 |
| 53 | -0.000002 | 0.000137  | -0.000072 | -0.000014 | -0.000018 | 0.000085  | 0.000291  | -0.000065 | 0.000154  | 0.000236  | 0.000337  | 0.000343  |
| 54 | 0.000087  | 0.000047  | -0.000044 | 0.000012  | 0.000001  | 0.000059  | -0.000022 | 0.000017  | 0.000028  | -0.000018 | -0.000028 | 0.000082  |
| 55 | -0.000259 | -0.000001 | -0.000047 | -0.000193 | -0.000219 | -0.000176 | 0.000052  | -0.000103 | -0.000230 | -0.000061 | -0.000205 | -0.000234 |
| 56 | 0.000170  | -0.000007 | -0.000038 | 0.000023  | 0.000022  | 0.000061  | 0.000040  | 0.000113  | 0.000003  | -0.000035 | 0.000070  | 0.000164  |
| 57 | 0.000022  | -0.000012 | 0.000012  | 0.000019  | 0.000015  | -0.000004 | 0.000015  | 0.000026  | -0.000012 | -0.000010 | 0.000023  | 0.000001  |
| 58 | 0.000059  | -0.000049 | -0.000022 | 0.000048  | 0.000057  | 0.000048  | -0.000037 | -0.000005 | 0.000127  | 0.000048  | -0.000013 | 0.000051  |
| 59 | 0.000120  | 0.000023  | -0.000048 | 0.000037  | 0.000049  | 0.000079  | -0.000011 | 0.000008  | 0.000110  | 0.000049  | 0.000013  | 0.000057  |
| 60 | 0.000076  | 0.000012  | 0.000046  | 0.000023  | 0.000007  | -0.000007 | -0.000005 | -0.000573 | 0.000165  | 0.000496  | -0.000067 | 0.000057  |
| 61 | -0.000106 | -0.000982 | -0.000192 | 0.000277  | 0.000205  | 0.000152  | 0.001154  | 0.000794  | 0.000523  | -0.000771 | -0.001011 | 0.000380  |
| 62 | -0.001565 | 0.000415  | -0.000172 | -0.000038 | -0.000085 | 0.000092  | -0.000976 | 0.000722  | 0.001152  | -0.000199 | 0.000777  | -0.000057 |
| 63 | -0.002015 | -0.000430 | -0.000426 | 0.000040  | -0.000101 | -0.000061 | -0.001725 | 0.000089  | 0.000524  | 0.000592  | 0.000633  | 0.000267  |
| 64 | 0.000177  | -0.000899 | 0.000094  | 0.000183  | 0.000177  | 0.000161  | 0.001611  | -0.001291 | 0.001173  | 0.000198  | -0.000874 | -0.000609 |
| 65 | -0.000179 | 0.000310  | 0.000494  | 0.000045  | 0.000113  | -0.000151 | 0.002338  | -0.000436 | -0.000102 | -0.000082 | -0.000314 | -0.000571 |
| 66 | 0.001279  | 0.001281  | -0.000007 | -0.000248 | -0.000182 | -0.000060 | -0.002066 | 0.000925  | -0.000237 | 0.000764  | 0.001492  | 0.000358  |
| 67 | 0.002261  | 0.001372  | 0.000090  | -0.000369 | -0.000212 | 0.000060  | -0.001816 | -0.000589 | -0.000883 | 0.000234  | 0.000647  | -0.000025 |
| 68 | 0.000142  | -0.000953 | 0.000121  | 0.000103  | 0.000086  | -0.000196 | 0.001494  | -0.000576 | -0.002028 | -0.000824 | -0.001391 | 0.000319  |
| 69 | 0.000164  | 0.001510  | -0.000454 | 0.000112  | 0.000055  | 0.000068  | -0.000607 | 0.002034  | -0.001299 | 0.000620  | 0.000197  | -0.000680 |
| 70 | 0.000958  | -0.007362 | 0.001258  | -0.000006 | -0.000207 | -0.000087 | 0.001448  | 0.001306  | -0.000153 | 0.000078  | 0.001071  | -0.000493 |
| 71 | 0.000129  | 0.003677  | -0.000375 | -0.000061 | 0.000065  | 0.000015  | -0.000348 | -0.006802 | 0.001476  | -0.001479 | -0.000798 | 0.000834  |
| 72 | -0.000930 | 0.002357  | -0.000365 | -0.000088 | 0.000069  | -0.000027 | -0.000497 | 0.003398  | -0.000320 | 0.000789  | -0.000431 | 0.000346  |
| 73 | -0.000071 | -0.001410 | 0.000233  | -0.000099 | -0.000122 | -0.000131 | 0.000248  | -0.000639 | 0.000576  | -0.000044 | 0.000227  | 0.000620  |
| 74 | 0.000095  | 0.000827  | 0.000056  | 0.000096  | 0.000057  | 0.000114  | -0.000028 | 0.000634  | 0.000124  | 0.000127  | -0.000187 | 0.000169  |
| 75 | 0.000042  | 0.000769  | -0.000061 | 0.000093  | 0.000078  | 0.000140  | -0.000034 | 0.000866  | 0.000286  | 0.000013  | -0.000054 | 0.000185  |
| 76 | 0.001607  | -0.000581 | 0.000340  | -0.000053 | -0.000125 | -0.000113 | 0.000087  | -0.001200 | 0.000441  | -0.000443 | 0.000095  | -0.000254 |
| 77 | -0.006872 | 0.004766  | -0.000048 | -0.000056 | 0.000051  | -0.000301 | 0.000181  | -0.001133 | 0.000030  | -0.000211 | -0.000280 | 0.000132  |
| 78 | 0.001170  | 0.001186  | -0.000558 | 0.000314  | 0.000180  | 0.000404  | 0.000024  | 0.000756  | 0.000073  | 0.000213  | -0.000026 | 0.000315  |
| 79 | 0.005764  | -0.001502 | -0.000231 | 0.000596  | 0.000068  | 0.000399  | -0.000345 | 0.000647  | 0.000053  | 0.000097  | 0.000140  | 0.000158  |
| 80 | 0.002471  | -0.022066 | -0.002028 | -0.000779 | -0.000298 | -0.000867 | 0.000776  | -0.000457 | 0.001408  | -0.000517 | -0.000303 | 0.000254  |
| 81 | -0.006272 | -0.001656 | 0.001011  | -0.001189 | -0.000339 | -0.001023 | -0.001690 | 0.004896  | -0.006825 | 0.004019  | -0.003487 | 0.002248  |
| 82 | 0.001070  | 0.008160  | -0.000065 | 0.000347  | 0.000067  | 0.000430  | -0.000182 | 0.001315  | 0.001287  | -0.001051 | 0.001038  | -0.000766 |

|     |           |           |           |           |           |           |           |           |           |           |           |           |
|-----|-----------|-----------|-----------|-----------|-----------|-----------|-----------|-----------|-----------|-----------|-----------|-----------|
| 83  | -0.000528 | 0.003531  | 0.000040  | 0.000311  | 0.000195  | 0.000290  | -0.000232 | -0.001261 | 0.005716  | -0.002812 | 0.002982  | -0.000190 |
| 84  | 0.000129  | -0.009070 | -0.000208 | -0.000235 | 0.000042  | -0.000335 | -0.000113 | -0.022862 | 0.002612  | -0.005805 | 0.003143  | -0.008870 |
| 85  | 0.000727  | -0.000685 | 0.000041  | 0.000005  | -0.000155 | 0.000036  | 0.000479  | -0.001110 | -0.006421 | 0.003109  | -0.004881 | 0.002367  |
| 86  | 0.000180  | 0.000643  | -0.000046 | 0.000066  | 0.000079  | 0.000080  | -0.000088 | 0.008877  | 0.000999  | 0.003068  | -0.002067 | 0.005984  |
| 87  | 0.000302  | 0.000921  | -0.000016 | 0.000062  | 0.000049  | 0.000072  | -0.000015 | 0.003675  | -0.000388 | 0.000669  | -0.001258 | 0.001264  |
| 88  | 0.000038  | -0.001333 | 0.000104  | -0.000127 | -0.000140 | -0.000125 | 0.000245  | -0.009697 | 0.000355  | -0.003537 | 0.002895  | -0.006578 |
| 89  | -0.000847 | -0.000818 | -0.000471 | 0.000004  | 0.000119  | 0.000016  | -0.000005 | 0.000021  | -0.000406 | 0.000152  | 0.000045  | -0.000324 |
| 90  | -0.012706 | -0.008268 | -0.004323 | -0.003031 | -0.000935 | -0.003152 | -0.004410 | -0.000955 | -0.000917 | 0.000344  | -0.000022 | -0.000444 |
| 91  | -0.000336 | -0.000774 | -0.000012 | -0.000049 | 0.000123  | -0.000036 | -0.000377 | -0.007567 | -0.012352 | 0.003298  | 0.004544  | -0.013240 |
| 92  | -0.000247 | 0.000122  | -0.000134 | -0.000081 | 0.000031  | -0.000052 | -0.000116 | -0.000930 | -0.000280 | -0.000011 | -0.000171 | -0.000864 |
| 93  | -0.000051 | -0.000420 | -0.000020 | -0.000051 | -0.000025 | -0.000061 | 0.000012  | -0.000321 | -0.000011 | -0.000037 | 0.000089  | -0.000083 |
| 94  | -0.000045 | -0.000407 | -0.000035 | -0.000046 | -0.000032 | -0.000054 | 0.000017  | -0.000314 | -0.000115 | -0.000090 | 0.000099  | -0.000085 |
| 95  | 0.000003  | -0.000447 | 0.000029  | -0.000053 | -0.000046 | -0.000075 | 0.000017  | -0.000447 | -0.000144 | -0.000015 | 0.000020  | -0.000109 |
| 96  | -0.000027 | -0.000320 | 0.000033  | -0.000040 | -0.000032 | -0.000065 | 0.000017  | -0.000427 | -0.000138 | -0.000001 | 0.000041  | -0.000084 |
| 97  | -0.000765 | -0.000646 | 0.000239  | -0.000241 | -0.000119 | -0.000234 | -0.000009 | -0.000410 | -0.000025 | -0.000092 | 0.000003  | -0.000173 |
| 98  | -0.000385 | -0.000530 | 0.000310  | -0.000075 | -0.000059 | -0.000169 | -0.000011 | -0.000346 | -0.000047 | -0.000122 | 0.000022  | -0.000143 |
| 99  | -0.003431 | -0.001095 | -0.000265 | 0.000083  | 0.000295  | 0.000014  | 0.000518  | -0.000307 | -0.000053 | -0.000077 | -0.000062 | -0.000101 |
| 100 | -0.002352 | 0.002578  | 0.000522  | -0.000673 | -0.000365 | -0.000413 | -0.000187 | -0.000334 | 0.000011  | -0.000021 | -0.000079 | -0.000058 |
| 101 | 0.000825  | 0.001895  | -0.000233 | -0.000414 | -0.000375 | -0.000583 | 0.000315  | -0.000676 | -0.000819 | 0.000462  | -0.000528 | 0.000105  |
| 102 | -0.001963 | -0.010071 | 0.000328  | 0.000075  | 0.000313  | 0.000145  | -0.000197 | -0.000600 | -0.000429 | 0.000615  | -0.000484 | 0.000642  |
| 103 | 0.000559  | -0.001766 | -0.000006 | -0.000116 | -0.000062 | -0.000074 | 0.000132  | -0.001182 | -0.003301 | 0.000739  | -0.000686 | -0.001476 |
| 104 | -0.000052 | -0.001772 | -0.000029 | -0.000194 | -0.000132 | -0.000218 | 0.000088  | 0.002444  | -0.002413 | 0.002067  | -0.002288 | 0.001655  |
| 105 | -0.000036 | -0.000332 | 0.000021  | -0.000028 | -0.000032 | -0.000029 | 0.000047  | 0.001573  | 0.000822  | -0.001760 | 0.001489  | -0.002357 |
| 106 | -0.000136 | -0.000308 | 0.000026  | -0.000039 | -0.000047 | -0.000051 | 0.000043  | -0.010452 | -0.001836 | -0.001299 | 0.000569  | -0.003620 |
| 107 | -0.000157 | -0.000448 | 0.000014  | -0.000029 | -0.000029 | -0.000036 | 0.000016  | -0.001786 | 0.000473  | -0.000289 | 0.000697  | -0.000406 |
| 108 | -0.000141 | -0.000476 | 0.000001  | -0.000032 | -0.000021 | -0.000035 | 0.000001  | -0.001869 | -0.000047 | -0.000398 | 0.000554  | -0.000872 |
| 109 | 0.001071  | 0.000729  | 0.000335  | -0.000065 | -0.000050 | -0.000046 | 0.000160  | 0.000218  | 0.000579  | -0.000211 | -0.000440 | -0.000090 |
| 110 | -0.000192 | 0.000106  | 0.000136  | 0.000059  | -0.000068 | 0.000031  | -0.000153 | -0.000240 | -0.000186 | 0.000055  | 0.000406  | 0.000417  |
| 111 | 0.011460  | -0.000278 | 0.000392  | 0.001270  | 0.000423  | 0.002644  | 0.003255  | 0.000944  | 0.000799  | -0.000337 | -0.000187 | 0.000141  |
| 112 | 0.001286  | 0.008668  | 0.003907  | 0.001746  | 0.000506  | 0.000529  | 0.001171  | 0.000047  | 0.000154  | 0.000003  | 0.000188  | 0.000300  |
| 113 | 0.000394  | 0.000610  | 0.000085  | 0.000027  | -0.000019 | 0.000024  | 0.000250  | -0.001507 | 0.011718  | -0.010419 | 0.007426  | -0.003002 |
| 114 | -0.000031 | 0.000172  | -0.000075 | 0.000021  | -0.000104 | 0.000013  | 0.000130  | 0.009116  | 0.000678  | 0.006950  | -0.011790 | 0.016131  |
| 115 | 0.000501  | 0.000156  | 0.000046  | -0.000029 | -0.000019 | -0.000071 | 0.000108  | 0.000747  | 0.000379  | -0.000275 | 0.000011  | 0.000447  |
| 116 | -0.000265 | -0.000290 | 0.000084  | 0.000109  | -0.000013 | 0.000124  | 0.000007  | 0.000218  | -0.000067 | 0.000293  | 0.000138  | 0.000415  |
| 117 | 0.001425  | 0.000111  | -0.000171 | -0.000055 | 0.000004  | 0.000223  | -0.000103 | -0.000615 | -0.000579 | -0.000268 | -0.000283 | 0.000627  |
| 118 | 0.000429  | -0.000253 | 0.000019  | -0.000001 | 0.000016  | 0.000029  | 0.000134  | -0.000045 | -0.000230 | 0.000068  | 0.000681  | 0.000412  |
| 119 | 0.000846  | -0.000162 | -0.000079 | 0.000065  | 0.000061  | 0.000218  | -0.000120 | 0.000148  | 0.000118  | -0.000100 | 0.000278  | 0.000678  |
| 120 | -0.000149 | -0.000173 | 0.000077  | -0.000060 | -0.000042 | -0.000125 | 0.000029  | -0.000001 | -0.000146 | 0.000039  | 0.000299  | -0.000052 |
| 121 | 0.000121  | 0.000066  | -0.000063 | 0.000032  | 0.000022  | 0.000101  | -0.000039 | -0.000042 | 0.000125  | -0.000032 | -0.000212 | 0.000090  |
| 122 | 0.000024  | 0.000105  | -0.000014 | 0.000028  | 0.000021  | 0.000023  | 0.000011  | 0.000043  | 0.000020  | -0.000007 | -0.000088 | -0.000038 |
| 123 | -0.000236 | 0.000032  | 0.000110  | -0.000037 | -0.000050 | -0.000144 | 0.000099  | 0.000036  | -0.000161 | 0.000026  | 0.000169  | -0.000127 |
| 124 | 0.000247  | -0.000008 | -0.000055 | 0.000008  | 0.000008  | 0.000089  | -0.000007 | -0.000074 | 0.000071  | -0.000015 | -0.000094 | 0.000099  |
| 125 | -0.000003 | -0.000020 | -0.000057 | 0.000028  | 0.000041  | 0.000057  | -0.000094 | 0.000040  | 0.000092  | -0.000010 | -0.000073 | 0.000028  |
| 126 | 0.000673  | -0.000160 | 0.000004  | 0.000126  | 0.000134  | 0.000143  | 0.000073  | 0.000245  | 0.000057  | -0.000078 | 0.000293  | 0.000431  |
| 127 | 0.000312  | -0.000160 | 0.000070  | 0.000060  | 0.000072  | 0.000031  | 0.000038  | 0.000147  | -0.000072 | -0.000050 | 0.000327  | 0.000184  |
| 128 | -0.000062 | -0.000062 | -0.000011 | -0.000011 | 0.000003  | -0.000019 | -0.000010 | 0.000032  | -0.000039 | -0.000006 | 0.000043  | -0.000013 |
| 129 | 0.000057  | 0.000027  | 0.000005  | 0.000016  | 0.000013  | 0.000027  | 0.000007  | -0.000012 | 0.000052  | 0.000020  | -0.000023 | 0.000040  |
| 130 | 0.000107  | 0.000022  | -0.000047 | -0.000003 | 0.000003  | 0.000046  | 0.000017  | -0.000038 | 0.000071  | 0.000035  | -0.000031 | 0.000012  |
| 131 | -0.000072 | 0.000015  | 0.000025  | 0.000002  | -0.000002 | -0.000019 | -0.000003 | 0.000018  | -0.000031 | -0.000009 | 0.000021  | -0.000017 |
| 132 | 0.000014  | 0.000035  | 0.000013  | -0.000002 | -0.000005 | -0.000014 | 0.000012  | -0.000001 | -0.000017 | -0.000002 | 0.000005  | -0.000036 |

|     |           |           |           |           |           |           |           |           |           |           |           |           |
|-----|-----------|-----------|-----------|-----------|-----------|-----------|-----------|-----------|-----------|-----------|-----------|-----------|
| 133 | -0.000049 | -0.000037 | 0.000017  | -0.000003 | -0.000013 | -0.000023 | -0.000023 | 0.000002  | -0.000039 | -0.000040 | -0.000015 | 0.000013  |
| 134 | 0.000696  | 0.000722  | 0.000183  | 0.000003  | 0.000047  | 0.000059  | 0.000361  | -0.000690 | -0.000349 | 0.000141  | 0.000588  | -0.000212 |
| 135 | -0.000384 | 0.000111  | 0.000116  | 0.000008  | -0.000008 | -0.000042 | -0.000046 | -0.001326 | -0.001091 | -0.000041 | 0.000686  | -0.000062 |
| 136 | -0.000245 | 0.000105  | 0.000114  | -0.000007 | -0.000007 | -0.000017 | -0.000058 | -0.000364 | -0.000771 | 0.000030  | 0.000319  | 0.000175  |
| 137 | 0.000656  | 0.000038  | 0.000029  | -0.000015 | 0.000000  | -0.000011 | 0.000017  | -0.000297 | 0.000124  | -0.000099 | 0.000238  | -0.000287 |
| 138 | 0.001169  | 0.000322  | 0.000049  | -0.000040 | 0.000041  | 0.000055  | 0.000011  | -0.000021 | 0.000213  | -0.000126 | 0.000290  | -0.000241 |
| 139 | 0.002791  | 0.000974  | 0.000483  | -0.000117 | 0.000129  | 0.000100  | -0.000189 | -0.000233 | -0.000599 | 0.000041  | 0.000307  | 0.000243  |
| 140 | 0.002042  | 0.001705  | -0.000090 | -0.000208 | 0.000135  | 0.000173  | -0.000002 | 0.000129  | 0.000192  | -0.000037 | 0.000063  | -0.000146 |
| 141 | 0.002281  | 0.001115  | -0.000957 | -0.000215 | 0.000111  | 0.000052  | 0.000459  | -0.000017 | 0.000106  | -0.000045 | -0.000076 | -0.000166 |
| 142 | 0.001031  | 0.001033  | -0.001386 | -0.000258 | 0.000084  | 0.000053  | 0.000688  | -0.000312 | -0.000589 | 0.000047  | 0.000105  | 0.000057  |
| 143 | -0.000434 | -0.002650 | 0.000689  | 0.000167  | 0.000045  | -0.000195 | 0.000910  | -0.000770 | -0.001077 | -0.000171 | 0.000178  | 0.000224  |
| 144 | 0.003195  | -0.000487 | -0.000023 | -0.000073 | 0.000004  | -0.000250 | -0.001264 | -0.001987 | -0.003608 | -0.000397 | -0.001197 | 0.001178  |
| 145 | -0.001592 | -0.001380 | -0.000756 | 0.000527  | 0.000193  | -0.000291 | -0.000108 | -0.002785 | -0.001401 | -0.001463 | 0.000556  | -0.000088 |
| 146 | 0.001873  | 0.000540  | -0.000834 | -0.000221 | -0.000133 | 0.000226  | 0.001744  | -0.001069 | -0.001052 | -0.000749 | -0.000699 | 0.000498  |
| 147 | 0.003373  | 0.001039  | -0.000693 | -0.000163 | -0.000092 | 0.000372  | 0.001876  | -0.000144 | -0.000311 | 0.000958  | -0.001233 | 0.001681  |
| 148 | 0.002160  | 0.001844  | -0.000188 | -0.000104 | -0.000051 | 0.000183  | 0.000325  | 0.004535  | 0.000272  | -0.003026 | 0.000774  | -0.000826 |
| 149 | 0.000634  | 0.000219  | -0.000024 | 0.000015  | 0.000011  | -0.000054 | -0.000012 | -0.002398 | -0.003276 | 0.000804  | 0.000666  | 0.000197  |
| 150 | 0.001347  | 0.000613  | 0.000028  | -0.000056 | 0.000006  | -0.000017 | 0.000107  | -0.000065 | 0.001932  | -0.001508 | 0.003982  | -0.002715 |
| 151 | 0.000819  | 0.000304  | 0.000065  | -0.000055 | 0.000001  | -0.000006 | 0.000161  | -0.000279 | -0.001445 | 0.000994  | -0.000888 | 0.000709  |
| 152 | -0.000194 | 0.000207  | 0.000077  | -0.000023 | 0.000000  | -0.000041 | -0.000097 | -0.001090 | -0.002044 | 0.000994  | 0.000354  | 0.000775  |
| 153 | -0.000383 | 0.000134  | 0.000061  | 0.000026  | 0.000018  | -0.000033 | -0.000117 | -0.002746 | -0.001283 | -0.000287 | 0.001315  | 0.000156  |
| 154 | 0.001607  | 0.000888  | -0.000027 | -0.000087 | 0.000053  | 0.000078  | 0.000076  | -0.000027 | -0.000652 | -0.000220 | 0.000587  | 0.000164  |
| 155 | -0.001383 | -0.003646 | 0.000597  | 0.000371  | 0.000137  | -0.000658 | -0.000518 | -0.001052 | -0.001061 | -0.000275 | 0.000570  | 0.000074  |
| 156 | 0.001639  | 0.000562  | -0.000130 | -0.000049 | 0.000006  | 0.000014  | 0.000225  | 0.002664  | 0.002816  | -0.010603 | 0.011119  | -0.006770 |
| 157 | 0.000379  | 0.000412  | 0.000141  | 0.000012  | 0.000009  | -0.000026 | 0.000032  | -0.001187 | -0.001079 | -0.000242 | 0.000718  | 0.000042  |
| 158 | -0.000097 | -0.000120 | -0.000064 | -0.000032 | -0.000067 | 0.000035  | -0.000068 | 0.000015  | 0.000047  | 0.000081  | 0.000179  | -0.000019 |
| 159 | 0.001173  | 0.000734  | -0.000219 | -0.000166 | -0.000097 | 0.000285  | -0.000228 | 0.000265  | 0.000172  | 0.000175  | 0.000477  | 0.000008  |
| 160 | 0.001081  | 0.000517  | -0.000182 | -0.000131 | -0.000065 | 0.000249  | -0.000274 | 0.000187  | 0.000135  | 0.000126  | 0.000324  | -0.000030 |
| 161 | 0.000125  | -0.000140 | -0.000024 | 0.000005  | 0.000023  | 0.000043  | 0.000221  | -0.000071 | -0.000020 | -0.000054 | -0.000195 | -0.000070 |
| 162 | -0.000055 | -0.000047 | -0.000043 | -0.000002 | 0.000009  | 0.000008  | -0.000008 | 0.000218  | -0.000188 | -0.000136 | -0.000161 | 0.000053  |
| 163 | 0.000538  | -0.000445 | -0.000003 | 0.000072  | 0.000141  | 0.000086  | 0.001124  | -0.000021 | -0.000292 | -0.000475 | -0.000917 | -0.000049 |
| 164 | -0.000305 | 0.000159  | 0.000229  | -0.000009 | -0.000021 | -0.000050 | -0.000067 | -0.000674 | -0.001331 | -0.000067 | 0.000640  | 0.000261  |
| 165 | 0.000014  | 0.000011  | -0.000023 | 0.000005  | -0.000004 | -0.000010 | 0.000006  | -0.000264 | 0.000082  | 0.000007  | 0.000001  | -0.000182 |
| 166 | -0.001016 | -0.000087 | -0.000106 | 0.000032  | -0.000003 | 0.000008  | -0.000022 | 0.000290  | -0.000071 | 0.000176  | -0.000383 | 0.000336  |
| 167 | 0.003315  | 0.000674  | -0.000260 | -0.000109 | 0.000039  | 0.000002  | -0.000021 | 0.000070  | 0.000186  | -0.000010 | -0.000068 | -0.000237 |
| 168 | -0.000477 | -0.001093 | 0.001283  | 0.000122  | -0.000114 | -0.000010 | -0.000434 | 0.000042  | -0.000004 | 0.000071  | 0.000010  | 0.000006  |
| 169 | -0.000120 | 0.004396  | -0.002128 | -0.000238 | 0.000238  | 0.000298  | 0.000095  | 0.000544  | 0.000905  | -0.000057 | -0.000110 | -0.000084 |
| 170 | 0.000679  | 0.004621  | 0.000150  | -0.000385 | -0.000086 | 0.000529  | 0.001372  | 0.000522  | 0.002420  | -0.001953 | 0.000687  | -0.001807 |
| 171 | 0.002225  | 0.001235  | -0.000733 | -0.000101 | -0.000073 | 0.000432  | 0.002451  | 0.001589  | 0.001769  | 0.000642  | 0.001206  | -0.000963 |
| 172 | -0.003578 | -0.000214 | 0.000119  | 0.000093  | 0.000071  | -0.000059 | -0.000284 | -0.005677 | 0.000125  | -0.001369 | -0.000741 | -0.000207 |
| 173 | 0.001332  | 0.000506  | 0.000120  | -0.000094 | -0.000001 | -0.000022 | 0.000221  | 0.001514  | 0.001729  | -0.001115 | -0.000381 | -0.001691 |
| 174 | -0.000075 | 0.000075  | 0.000011  | -0.000005 | -0.000003 | -0.000009 | -0.000040 | -0.000646 | -0.001043 | 0.000638  | 0.000680  | 0.000378  |
| 175 | 0.000281  | -0.000399 | -0.000143 | 0.000036  | -0.000002 | 0.000061  | 0.000119  | 0.000925  | 0.002671  | -0.001062 | 0.000560  | -0.001054 |
| 176 | 0.001247  | -0.000651 | -0.000270 | 0.000090  | -0.000030 | -0.000055 | 0.000147  | 0.000338  | 0.002144  | 0.000199  | -0.000950 | -0.001006 |
| 177 | -0.001205 | 0.000546  | -0.000129 | -0.000065 | -0.000060 | -0.000027 | 0.000262  | -0.000553 | -0.001736 | 0.000023  | 0.000796  | 0.000650  |
| 178 | -0.005939 | 0.012717  | 0.000090  | -0.001064 | 0.000002  | 0.000944  | -0.000348 | 0.000284  | -0.000772 | 0.000266  | 0.000631  | 0.000397  |
| 179 | 0.005481  | -0.014153 | 0.000301  | 0.001034  | 0.000156  | -0.000947 | -0.000078 | 0.000474  | 0.001202  | 0.001128  | -0.000476 | 0.000110  |
| 180 | 0.001619  | 0.001555  | 0.000165  | -0.000045 | 0.000040  | 0.000097  | 0.000217  | -0.012609 | 0.003548  | 0.000797  | -0.004783 | 0.000774  |
| 181 | -0.001469 | 0.000263  | 0.000051  | -0.000019 | -0.000004 | -0.000099 | -0.000587 | 0.013602  | -0.003776 | -0.002670 | 0.001919  | -0.000378 |
| 182 | -0.002266 | -0.000713 | -0.000047 | 0.000068  | -0.000048 | -0.000114 | -0.000576 | -0.001938 | -0.001365 | -0.000826 | 0.002107  | -0.000201 |

|     |           |           |           |           |           |           |           |           |           |           |           |           |
|-----|-----------|-----------|-----------|-----------|-----------|-----------|-----------|-----------|-----------|-----------|-----------|-----------|
| 183 | 0.002043  | 0.000162  | -0.000072 | -0.000014 | 0.000019  | 0.000041  | 0.000240  | -0.000977 | 0.000976  | -0.000332 | 0.000431  | -0.000944 |
| 184 | 0.001311  | 0.000355  | -0.000113 | -0.000119 | 0.000010  | 0.000255  | -0.000289 | 0.000110  | 0.000113  | 0.000022  | -0.000039 | -0.000098 |
| 185 | 0.001344  | 0.001045  | -0.000168 | -0.000165 | -0.000071 | 0.000218  | -0.000368 | 0.000384  | 0.000289  | 0.000245  | 0.000665  | 0.000117  |
| 186 | -0.000238 | -0.000169 | 0.000034  | 0.000007  | -0.000024 | -0.000026 | -0.000160 | 0.000018  | -0.000035 | 0.000013  | 0.000058  | 0.000019  |
| 187 | -0.001272 | -0.000812 | 0.000103  | 0.000144  | 0.000057  | -0.000212 | 0.000536  | -0.000385 | -0.000207 | -0.000195 | -0.000561 | -0.000113 |
| 188 | -0.001165 | -0.000459 | 0.000148  | 0.000139  | 0.000033  | -0.000241 | 0.000289  | -0.000143 | -0.000167 | -0.000092 | -0.000141 | 0.000080  |
| 189 | 0.000013  | -0.000003 | 0.000015  | 0.000011  | 0.000004  | 0.000005  | -0.000007 | 0.000022  | -0.000014 | -0.000002 | 0.000021  | 0.000023  |
| 190 | 0.000256  | 0.000107  | 0.000105  | 0.000081  | 0.000036  | 0.000025  | -0.000018 | 0.000305  | 0.000152  | -0.000129 | 0.000017  | 0.000217  |
| 191 | 0.000136  | 0.000199  | -0.000008 | 0.000090  | 0.000087  | 0.000093  | -0.000053 | 0.000312  | -0.000230 | -0.000227 | 0.000366  | 0.000497  |
| 192 | 0.000059  | 0.000040  | 0.000030  | 0.000051  | 0.000019  | 0.000021  | -0.000011 | -0.000183 | -0.000073 | 0.000135  | -0.000036 | -0.000023 |
| 193 | 0.000019  | -0.000097 | 0.000010  | 0.000036  | 0.000019  | -0.000012 | -0.000028 | 0.000030  | 0.000222  | -0.000028 | -0.000068 | -0.000066 |
| 194 | 0.000277  | 0.000053  | -0.000016 | 0.000142  | 0.000081  | 0.000097  | -0.000056 | 0.000230  | 0.000334  | 0.000029  | -0.000131 | 0.000164  |
| 195 | 0.000316  | -0.000012 | 0.000082  | 0.000076  | 0.000033  | 0.000022  | -0.000045 | -0.000275 | 0.000250  | 0.000248  | -0.000122 | -0.000132 |
| 196 | -0.000003 | 0.000049  | 0.000033  | -0.000015 | -0.000011 | -0.000009 | 0.000016  | 0.000012  | -0.000018 | -0.000020 | -0.000012 | -0.000006 |
| 197 | 0.000123  | 0.000057  | -0.000017 | 0.000058  | 0.000061  | 0.000072  | 0.000004  | 0.000041  | 0.000086  | 0.000005  | -0.000006 | 0.000086  |
| 198 | 0.000082  | -0.000018 | -0.000037 | 0.000061  | 0.000049  | 0.000051  | -0.000040 | 0.000029  | 0.000084  | 0.000023  | 0.000004  | 0.000067  |
| 199 | 0.000090  | -0.000012 | -0.000006 | 0.000069  | 0.000039  | 0.000035  | -0.000032 | 0.000021  | 0.000110  | 0.000028  | -0.000012 | 0.000074  |
| 200 | -0.000013 | -0.000110 | 0.000024  | -0.000001 | -0.000017 | -0.000054 | -0.000007 | -0.000014 | -0.000028 | -0.000007 | 0.000008  | -0.000026 |
| 201 | 0.086033  | 0.243310  | 0.082235  | -0.010615 | -0.005081 | -0.004483 | -0.007556 | 0.000124  | 0.000134  | 0.000014  | 0.000087  | 0.000135  |
| 202 | 1.212170  | 0.087957  | 0.083545  | 0.089747  | -0.006823 | -0.004960 | -0.005395 | 0.000202  | 0.000310  | -0.000013 | 0.000078  | 0.000233  |
| 203 | 0.080845  | 1.193870  | -0.006531 | 0.090573  | 0.089740  | -0.006736 | -0.001472 | -0.000011 | -0.000031 | 0.000016  | -0.000002 | 0.000024  |
| 204 | 0.203970  | 0.057432  | -0.001628 | -0.006942 | 0.089790  | 0.091324  | -0.006529 | 0.000030  | 0.000071  | 0.000011  | 0.000083  | 0.000106  |
| 205 | 5.764200  | 0.204231  | -0.005263 | -0.005236 | -0.006681 | 0.089585  | 0.085298  | 0.000048  | 0.000179  | 0.000042  | 0.000064  | 0.000256  |
| 206 | 0.204231  | 5.549240  | -0.007938 | -0.004599 | -0.004553 | -0.010800 | 0.084632  | 0.000309  | 0.000253  | 0.000028  | 0.000038  | 0.000196  |
| 207 | -0.005263 | -0.007938 | 5.295990  | 0.009030  | 0.002130  | 0.001500  | 0.003209  | -0.000012 | -0.000001 | -0.000006 | -0.000014 | -0.000059 |
| 208 | -0.005236 | -0.004599 | 0.009030  | 5.283440  | 0.008881  | 0.002795  | 0.001513  | 0.000013  | 0.000099  | 0.000007  | 0.000037  | 0.000065  |
| 209 | -0.006681 | -0.004553 | 0.002130  | 0.008881  | 5.289760  | 0.009080  | 0.002278  | 0.000011  | 0.000064  | 0.000011  | 0.000024  | 0.000080  |
| 210 | 0.089585  | -0.010800 | 0.001500  | 0.002795  | 0.009080  | 5.278460  | 0.009538  | 0.000018  | 0.000125  | -0.000006 | 0.000016  | 0.000113  |
| 211 | 0.085298  | 0.084632  | 0.003209  | 0.001513  | 0.002278  | 0.009538  | 5.289000  | -0.000028 | -0.000012 | -0.000018 | -0.000015 | 0.000037  |
| 212 | 0.000048  | 0.000309  | -0.000012 | 0.000013  | 0.000011  | 0.000018  | -0.000028 | 5.548240  | 0.205642  | 0.056758  | 1.193650  | 0.087074  |
| 213 | 0.000179  | 0.000253  | -0.000001 | 0.000099  | 0.000064  | 0.000125  | -0.000012 | 0.205642  | 5.766840  | 0.205753  | 0.080506  | 1.212940  |
| 214 | 0.000042  | 0.000028  | -0.000006 | 0.000007  | 0.000011  | -0.000006 | -0.000018 | 0.056758  | 0.205753  | 5.775690  | 0.217312  | 0.084653  |
| 215 | 0.000064  | 0.000038  | -0.000014 | 0.000037  | 0.000024  | 0.000016  | -0.000015 | 1.193650  | 0.080506  | 0.217312  | 5.775690  | 0.208277  |
| 216 | 0.000256  | 0.000196  | -0.000059 | 0.000065  | 0.000080  | 0.000113  | 0.000037  | 0.087074  | 1.212940  | 0.084653  | 0.208277  | 5.761840  |
| 217 | 0.000264  | 0.000274  | -0.000006 | 0.000015  | 0.000028  | 0.000050  | 0.000082  | 0.242687  | 0.088110  | 1.194200  | 0.060092  | 0.199229  |
| 218 | -0.000049 | 0.000027  | 0.000031  | -0.000018 | -0.000031 | -0.000053 | -0.000006 | 0.082311  | 0.082005  | -0.006714 | -0.001693 | -0.005403 |
| 219 | 0.000045  | 0.000037  | -0.000009 | 0.000067  | 0.000046  | 0.000019  | -0.000047 | -0.010876 | 0.089434  | 0.090315  | -0.006571 | -0.004785 |
| 220 | 0.000080  | 0.000035  | -0.000021 | 0.000054  | 0.000048  | 0.000062  | -0.000022 | -0.004916 | -0.006734 | 0.089841  | 0.089522  | -0.006742 |
| 221 | 0.000112  | 0.000118  | -0.000027 | 0.000033  | 0.000050  | 0.000093  | 0.000043  | -0.004389 | -0.005466 | -0.007161 | 0.091481  | 0.089880  |
| 222 | 0.000027  | 0.000166  | -0.000016 | -0.000047 | -0.000023 | 0.000018  | 0.000064  | -0.007820 | -0.005074 | -0.001250 | -0.006066 | 0.086662  |
| 223 | 0.000028  | -0.000093 | 0.000010  | 0.000057  | 0.000008  | 0.000050  | -0.000036 | 0.000441  | 0.000135  | 0.000084  | 0.000037  | 0.000249  |
| 224 | 0.000275  | 0.000290  | -0.000029 | 0.000069  | 0.000068  | 0.000103  | 0.000019  | 0.000171  | 0.000216  | 0.000119  | -0.000015 | 0.000215  |
| 225 | 0.000233  | 0.000043  | -0.000005 | 0.000004  | 0.000019  | 0.000016  | 0.000029  | 0.000096  | 0.000169  | 0.000009  | 0.000011  | 0.000046  |
| 226 | -0.000202 | -0.000060 | -0.000007 | 0.000012  | 0.000003  | 0.000011  | -0.000026 | -0.000003 | 0.000005  | 0.000066  | 0.000028  | -0.000012 |
| 227 | -0.000076 | 0.000118  | -0.000027 | 0.000091  | 0.000065  | 0.000103  | -0.000052 | 0.000161  | 0.000226  | 0.000101  | -0.000040 | 0.000278  |
| 228 | 0.000336  | 0.000086  | 0.000005  | 0.000046  | 0.000029  | 0.000047  | 0.000025  | 0.000309  | 0.000059  | -0.000026 | 0.000022  | 0.000195  |
| 229 | 0.000013  | -0.000036 | -0.000005 | -0.000020 | -0.000021 | 0.000008  | 0.000009  | 0.000108  | 0.000027  | 0.000007  | 0.000003  | -0.000004 |
| 230 | 0.000106  | 0.000060  | -0.000017 | 0.000028  | 0.000038  | 0.000066  | 0.000020  | 0.000063  | 0.000094  | 0.000057  | 0.000013  | 0.000139  |
| 231 | 0.000081  | 0.000025  | -0.000012 | 0.000042  | 0.000035  | 0.000035  | -0.000005 | 0.000033  | 0.000070  | 0.000029  | 0.000011  | 0.000089  |
| 232 | 0.000079  | 0.000051  | 0.000008  | 0.000054  | 0.000037  | 0.000035  | -0.000008 | 0.000043  | 0.000081  | 0.000046  | -0.000016 | 0.000096  |

|     |           |           |           |           |           |           |           |           |           |           |           |           |
|-----|-----------|-----------|-----------|-----------|-----------|-----------|-----------|-----------|-----------|-----------|-----------|-----------|
| 233 | 0.000005  | -0.000026 | 0.000011  | 0.000005  | -0.000018 | -0.000011 | 0.000000  | 0.000032  | -0.000021 | 0.000005  | -0.000033 | -0.000055 |
| 234 | 0.000657  | 0.000235  | -0.000038 | 0.000209  | 0.000136  | 0.000204  | -0.000105 | 0.000303  | 0.001403  | 0.000235  | -0.000615 | -0.000110 |
| 235 | 0.000438  | 0.000292  | 0.000002  | 0.000159  | 0.000131  | 0.000169  | 0.000014  | 0.000305  | -0.000711 | -0.000254 | 0.000722  | 0.000980  |
| 236 | -0.000406 | -0.000132 | 0.000057  | -0.000146 | -0.000113 | -0.000151 | 0.000023  | -0.000199 | -0.000540 | -0.000059 | 0.000136  | -0.000170 |
| 237 | -0.000325 | -0.000040 | 0.000004  | -0.000085 | -0.000042 | -0.000077 | 0.000007  | -0.000132 | -0.000431 | -0.000056 | 0.000169  | -0.000047 |
| 238 | 0.000048  | 0.000019  | 0.000000  | -0.000008 | -0.000004 | 0.000011  | 0.000032  | 0.000020  | 0.000156  | 0.000010  | -0.000083 | -0.000060 |
| 239 | -0.000062 | -0.000041 | 0.000013  | -0.000029 | -0.000025 | -0.000032 | 0.000020  | 0.000001  | 0.000096  | -0.000008 | -0.000083 | -0.000109 |
| 240 | 0.000141  | 0.000042  | -0.000041 | 0.000067  | 0.000054  | 0.000066  | -0.000025 | 0.000102  | 0.000057  | -0.000022 | 0.000049  | 0.000159  |
| 241 | 0.000133  | 0.000047  | -0.000047 | 0.000066  | 0.000053  | 0.000071  | -0.000025 | 0.000134  | 0.000060  | -0.000038 | 0.000050  | 0.000181  |
| 242 | -0.000094 | 0.000011  | 0.000008  | -0.000027 | -0.000014 | -0.000020 | 0.000006  | -0.000111 | -0.000142 | 0.000041  | 0.000043  | -0.000031 |
| 243 | -0.000044 | 0.000053  | 0.000001  | 0.000011  | 0.000001  | 0.000003  | -0.000013 | -0.000066 | -0.000084 | 0.000032  | 0.000029  | 0.000028  |
| 244 | -0.000173 | -0.000192 | 0.000010  | -0.000069 | -0.000054 | -0.000091 | 0.000020  | -0.000174 | 0.000153  | 0.000089  | -0.000232 | -0.000359 |
| 245 | -0.000309 | -0.000294 | 0.000031  | -0.000147 | -0.000123 | -0.000152 | 0.000047  | -0.000184 | -0.000016 | 0.000030  | -0.000185 | -0.000462 |
| 246 | 0.146279  | 0.554076  | -0.049672 | -0.003625 | -0.004945 | 0.008530  | -0.080603 | 0.000263  | 0.000473  | 0.000113  | 0.000046  | 0.000339  |
| 247 | 0.135885  | 0.238871  | -0.079520 | 0.008656  | -0.005439 | -0.003259 | -0.050797 | 0.000278  | 0.000516  | -0.000150 | 0.000169  | 0.000296  |
| 248 | -0.573066 | 0.138813  | 0.121692  | -0.054629 | -0.001088 | -0.005497 | 0.013558  | -0.000128 | -0.000356 | -0.000006 | -0.000101 | -0.000270 |
| 249 | -0.537292 | 0.133078  | 0.110951  | -0.064930 | 0.010381  | -0.005466 | 0.003002  | -0.000046 | -0.000214 | 0.000006  | -0.000074 | -0.000082 |
| 250 | -0.538782 | -0.551566 | -0.062782 | 0.118685  | -0.056796 | 0.000174  | -0.004662 | -0.000040 | 0.000031  | -0.000003 | 0.000032  | -0.000030 |
| 251 | -0.574606 | -0.514619 | -0.053287 | 0.118366  | -0.066469 | 0.012067  | -0.004929 | -0.000089 | -0.000066 | -0.000001 | 0.000007  | -0.000089 |
| 252 | 0.149438  | -0.516181 | 0.008065  | -0.066593 | 0.118782  | -0.057183 | -0.002733 | 0.000051  | 0.000113  | -0.000007 | 0.000021  | 0.000105  |
| 253 | 0.150956  | -0.552358 | -0.002612 | -0.056838 | 0.119206  | -0.066849 | 0.008264  | 0.000043  | 0.000124  | 0.000004  | 0.000034  | 0.000127  |
| 254 | 0.285957  | 0.145557  | -0.004681 | 0.011908  | -0.066262 | 0.120153  | -0.054569 | -0.000005 | -0.000051 | -0.000003 | -0.000014 | -0.000038 |
| 255 | 0.515771  | 0.146138  | -0.004439 | 0.000203  | -0.056672 | 0.118348  | -0.063930 | 0.000018  | 0.000025  | -0.000016 | -0.000026 | 0.000011  |
| 256 | 0.533510  | 0.267133  | 0.003021  | -0.005614 | 0.010360  | -0.065601 | 0.113582  | -0.000182 | -0.000231 | 0.000033  | -0.000026 | -0.000117 |
| 257 | 0.306101  | 0.511091  | 0.013262  | -0.005592 | -0.001053 | -0.055418 | 0.123804  | -0.000166 | -0.000365 | 0.000031  | -0.000067 | -0.000251 |
| 258 | 0.000474  | -0.000020 | -0.000119 | 0.000173  | 0.000134  | 0.000143  | -0.000008 | 0.237011  | 0.137185  | -0.564431 | -0.582436 | 0.135255  |
| 259 | 0.000169  | 0.000738  | -0.000011 | 0.000128  | 0.000134  | 0.000291  | 0.000035  | 0.559056  | 0.143901  | -0.584228 | -0.569033 | 0.141318  |
| 260 | -0.000283 | -0.000202 | 0.000044  | -0.000150 | -0.000121 | -0.000149 | 0.000007  | 0.513800  | 0.305634  | 0.154328  | -0.533904 | -0.570920 |
| 261 | -0.000102 | -0.000066 | 0.000041  | -0.000075 | -0.000068 | -0.000080 | 0.000024  | 0.262921  | 0.533005  | 0.156584  | -0.567993 | -0.534876 |
| 262 | -0.000056 | -0.000006 | 0.000017  | 0.000017  | -0.000010 | -0.000021 | -0.000030 | 0.145238  | 0.517500  | 0.298774  | 0.151387  | -0.538153 |
| 263 | -0.000076 | -0.000075 | 0.000018  | 0.000004  | -0.000003 | -0.000054 | -0.000039 | 0.144326  | 0.287231  | 0.527189  | 0.153962  | -0.574198 |
| 264 | 0.000110  | 0.000020  | -0.000032 | 0.000064  | 0.000057  | 0.000084  | -0.000024 | -0.550843 | 0.150480  | 0.517669  | 0.288860  | 0.149218  |
| 265 | 0.000118  | 0.000019  | -0.000031 | 0.000058  | 0.000054  | 0.000081  | -0.000016 | -0.514478 | 0.148807  | 0.289660  | 0.517539  | 0.150547  |
| 266 | -0.000047 | 0.000010  | 0.000001  | -0.000028 | -0.000015 | -0.000018 | 0.000028  | -0.515245 | -0.574561 | 0.153994  | 0.525901  | 0.288382  |
| 267 | 0.000041  | 0.000063  | -0.000009 | -0.000011 | -0.000003 | 0.000032  | 0.000063  | -0.552041 | -0.538835 | 0.151032  | 0.297994  | 0.518789  |
| 268 | -0.000115 | -0.000215 | 0.000025  | -0.000062 | -0.000047 | -0.000107 | -0.000018 | 0.132410  | -0.537386 | -0.567987 | 0.159518  | 0.531598  |
| 269 | -0.000234 | -0.000269 | 0.000055  | -0.000117 | -0.000111 | -0.000200 | -0.000023 | 0.137838  | -0.572875 | -0.532510 | 0.158230  | 0.303005  |
| 270 | -0.000520 | 0.000048  | -0.000072 | 0.000180  | 0.000123  | 0.000185  | -0.000149 | 0.000208  | 0.000160  | 0.000086  | 0.000037  | 0.000622  |
| 271 | 0.001105  | 0.000657  | 0.000011  | 0.000146  | 0.000134  | 0.000174  | 0.000122  | 0.000421  | 0.000322  | 0.000205  | -0.000201 | 0.000430  |
| 272 | 0.000086  | -0.000274 | 0.000056  | -0.000123 | -0.000110 | -0.000159 | 0.000041  | -0.000135 | -0.000202 | -0.000137 | 0.000045  | -0.000407 |
| 273 | 0.000148  | -0.000178 | 0.000016  | -0.000076 | -0.000053 | -0.000085 | 0.000026  | -0.000111 | -0.000042 | -0.000099 | 0.000062  | -0.000243 |
| 274 | -0.000139 | -0.000010 | -0.000011 | -0.000004 | -0.000001 | 0.000015  | -0.000012 | 0.000028  | 0.000001  | 0.000036  | -0.000001 | 0.000050  |
| 275 | -0.000217 | -0.000015 | -0.000006 | -0.000017 | -0.000011 | -0.000005 | -0.000006 | -0.000049 | -0.000053 | 0.000020  | 0.000021  | -0.000063 |
| 276 | -0.000001 | 0.000196  | -0.000027 | 0.000049  | 0.000050  | 0.000057  | -0.000006 | 0.000006  | 0.000113  | 0.000057  | -0.000031 | 0.000143  |
| 277 | 0.000000  | 0.000163  | -0.000022 | 0.000049  | 0.000045  | 0.000057  | -0.000010 | 0.000003  | 0.000091  | 0.000046  | -0.000039 | 0.000124  |
| 278 | 0.000200  | -0.000084 | 0.000026  | -0.000017 | -0.000011 | -0.000033 | 0.000022  | -0.000050 | -0.000031 | -0.000022 | 0.000004  | -0.000093 |
| 279 | 0.000253  | -0.000075 | 0.000017  | 0.000007  | 0.000004  | -0.000008 | 0.000015  | -0.000023 | 0.000015  | -0.000029 | -0.000014 | -0.000008 |
| 280 | -0.000369 | -0.000203 | -0.000002 | -0.000067 | -0.000060 | -0.000066 | -0.000027 | -0.000142 | -0.000070 | -0.000034 | 0.000037  | -0.000228 |
| 281 | -0.000546 | -0.000225 | 0.000013  | -0.000126 | -0.000109 | -0.000132 | -0.000017 | -0.000155 | -0.000300 | -0.000132 | 0.000080  | -0.000327 |
| 282 | -0.000486 | -0.000341 | -0.000072 | 0.000058  | -0.000015 | 0.000001  | -0.000165 | -0.000024 | 0.000031  | 0.000098  | 0.000138  | 0.000123  |

|     |           |           |           |           |           |           |           |           |           |           |           |           |
|-----|-----------|-----------|-----------|-----------|-----------|-----------|-----------|-----------|-----------|-----------|-----------|-----------|
| 283 | -0.000085 | -0.000004 | -0.000011 | 0.000053  | 0.000009  | 0.000018  | -0.000060 | 0.000009  | 0.000028  | 0.000037  | 0.000020  | 0.000076  |
| 284 | 0.000011  | 0.000029  | 0.000002  | -0.000028 | -0.000005 | -0.000004 | 0.000023  | 0.000052  | -0.000019 | -0.000039 | 0.000011  | 0.000034  |
| 285 | -0.000028 | -0.000022 | -0.000003 | -0.000029 | -0.000006 | -0.000001 | 0.000022  | 0.000013  | -0.000006 | -0.000008 | 0.000000  | 0.000008  |
| 286 | -0.000027 | -0.000018 | -0.000005 | -0.000039 | -0.000014 | -0.000017 | 0.000030  | -0.000048 | 0.000008  | 0.000018  | -0.000035 | -0.000068 |
| 287 | 0.000011  | -0.000003 | -0.000016 | -0.000028 | 0.000008  | 0.000005  | 0.000023  | -0.000010 | 0.000054  | -0.000022 | -0.000034 | -0.000030 |
| 288 | -0.001217 | -0.001393 | -0.001438 | 0.000354  | -0.000006 | 0.000439  | 0.000916  | 0.000404  | 0.000232  | -0.000067 | -0.000196 | -0.000043 |
| 289 | -0.004333 | -0.003452 | -0.000351 | 0.000052  | 0.000016  | 0.000205  | -0.001456 | 0.000043  | 0.000075  | 0.000003  | -0.000056 | -0.000143 |
| 290 | 0.000380  | 0.000346  | 0.000031  | -0.000320 | -0.000080 | -0.000573 | -0.000138 | 0.000021  | 0.000046  | 0.000004  | 0.000039  | 0.000110  |
| 291 | 0.000076  | 0.000992  | 0.000381  | -0.000351 | 0.000166  | 0.000134  | -0.000232 | 0.000005  | 0.000042  | 0.000018  | 0.000034  | 0.000075  |
| 292 | 0.004094  | 0.004458  | 0.000490  | -0.000084 | 0.000479  | 0.000007  | 0.000168  | 0.000004  | 0.000005  | 0.000016  | 0.000040  | 0.000077  |
| 293 | 0.007158  | 0.001710  | -0.000673 | -0.000119 | -0.000021 | 0.000030  | -0.000470 | 0.000009  | 0.000082  | 0.000030  | 0.000053  | 0.000094  |
| 294 | 0.000103  | 0.000259  | 0.000068  | -0.000028 | 0.000022  | 0.000018  | 0.000057  | -0.001616 | -0.001303 | -0.001208 | -0.002284 | -0.000028 |
| 295 | 0.000139  | 0.000184  | 0.000015  | -0.000013 | -0.000009 | 0.000024  | 0.000056  | -0.001692 | -0.006635 | -0.003008 | 0.000573  | 0.006248  |
| 296 | -0.000092 | -0.000116 | 0.000000  | -0.000012 | -0.000017 | -0.000036 | -0.000024 | 0.004259  | 0.003596  | -0.000695 | -0.000585 | -0.001222 |
| 297 | -0.000044 | -0.000084 | -0.000004 | -0.000013 | -0.000016 | -0.000024 | -0.000005 | 0.000834  | 0.000736  | 0.001425  | 0.000510  | -0.001019 |
| 298 | -0.000066 | -0.000056 | -0.000020 | -0.000012 | -0.000007 | -0.000011 | 0.000003  | 0.000663  | 0.000856  | 0.000559  | 0.000801  | -0.003512 |
| 299 | -0.000073 | -0.000138 | -0.000020 | -0.000033 | -0.000028 | -0.000015 | 0.000017  | 0.004445  | 0.005072  | -0.001893 | -0.003399 | -0.003283 |
| 300 | 0.000024  | 0.000002  | 0.000019  | 0.000044  | 0.000008  | 0.000080  | 0.000019  | -0.000174 | -0.000085 | 0.000165  | -0.000018 | -0.000073 |
| 301 | -0.000068 | 0.000014  | -0.000002 | -0.000001 | -0.000008 | 0.000010  | 0.000007  | -0.000094 | -0.000167 | 0.000002  | 0.000048  | -0.000056 |
| 302 | -0.000021 | -0.000021 | -0.000002 | -0.000013 | 0.000000  | -0.000019 | -0.000002 | 0.000034  | 0.000074  | -0.000012 | 0.000018  | 0.000026  |
| 303 | -0.000001 | -0.000005 | -0.000008 | -0.000002 | 0.000001  | -0.000009 | -0.000003 | 0.000062  | 0.000049  | 0.000010  | 0.000039  | 0.000082  |
| 304 | 0.000000  | 0.000034  | 0.000001  | -0.000001 | 0.000004  | -0.000004 | 0.000003  | 0.000125  | 0.000099  | 0.000042  | 0.000017  | 0.000092  |
| 305 | -0.000030 | -0.000011 | -0.000004 | -0.000020 | -0.000006 | -0.000033 | -0.000005 | 0.000175  | 0.000055  | -0.000053 | 0.000097  | 0.000116  |
| 306 | -0.000463 | 0.000217  | -0.000051 | 0.000027  | 0.000008  | 0.000043  | -0.000065 | 0.000073  | -0.000119 | -0.000124 | 0.000091  | 0.000186  |
| 307 | -0.000237 | -0.000165 | -0.000057 | 0.000027  | 0.000012  | 0.000018  | -0.000068 | -0.000053 | 0.000039  | 0.000107  | 0.000006  | 0.000047  |
| 308 | -0.000050 | -0.000042 | 0.000003  | -0.000002 | -0.000005 | -0.000003 | -0.000022 | 0.000065  | -0.000005 | -0.000030 | 0.000071  | 0.000073  |
| 309 | 0.000008  | 0.000037  | 0.000010  | -0.000002 | -0.000017 | -0.000009 | 0.000009  | -0.000012 | -0.000028 | -0.000008 | -0.000022 | -0.000031 |
| 310 | 0.000018  | -0.000019 | -0.000002 | 0.000000  | 0.000013  | 0.000003  | 0.000010  | -0.000020 | -0.000002 | 0.000009  | 0.000005  | -0.000016 |
| 311 | 0.000059  | 0.000036  | 0.000002  | -0.000002 | 0.000009  | 0.000010  | 0.000002  | 0.000059  | 0.000002  | -0.000016 | -0.000002 | 0.000052  |
| 312 | 0.000197  | 0.000150  | 0.000044  | -0.000020 | -0.000011 | -0.000018 | 0.000068  | -0.000037 | -0.000009 | -0.000063 | -0.000055 | -0.000123 |
| 313 | 0.013125  | -0.030707 | 0.005378  | -0.000180 | 0.000452  | 0.000856  | 0.004004  | 0.000271  | 0.000388  | 0.000089  | -0.000131 | -0.000113 |
| 314 | -0.003865 | -0.001187 | -0.000982 | 0.000963  | 0.000002  | 0.000151  | 0.000330  | 0.000229  | 0.000089  | -0.000026 | -0.000061 | 0.000022  |
| 315 | -0.001311 | 0.002753  | 0.000393  | -0.000823 | -0.000078 | 0.000071  | -0.000422 | 0.000035  | 0.000090  | 0.000010  | -0.000022 | -0.000004 |
| 316 | -0.000659 | 0.003554  | -0.000168 | 0.000085  | -0.000070 | 0.000226  | 0.000273  | -0.000027 | -0.000052 | -0.000013 | -0.000005 | -0.000007 |
| 317 | 0.001010  | 0.000646  | 0.000321  | 0.000283  | -0.000199 | -0.000298 | 0.000117  | 0.000002  | -0.000023 | -0.000013 | 0.000012  | 0.000029  |
| 318 | -0.002394 | -0.001917 | -0.000054 | -0.000333 | 0.000161  | -0.000243 | 0.000911  | -0.000005 | -0.000007 | 0.000015  | 0.000009  | 0.000007  |
| 319 | 0.004667  | 0.002360  | 0.000569  | -0.000277 | 0.000148  | 0.000230  | -0.001264 | -0.000233 | -0.000096 | 0.000025  | 0.000067  | -0.000046 |
| 320 | 0.000140  | -0.000018 | -0.000044 | -0.000101 | -0.000067 | 0.000031  | 0.000140  | 0.032562  | -0.013766 | 0.001028  | 0.003296  | -0.009046 |
| 321 | 0.000086  | 0.000050  | 0.000014  | -0.000019 | 0.000009  | 0.000006  | 0.000002  | -0.002100 | -0.004903 | 0.002388  | -0.003125 | 0.001091  |
| 322 | 0.000000  | 0.000011  | 0.000017  | -0.000014 | -0.000014 | -0.000012 | 0.000009  | 0.001324  | 0.002631  | -0.003452 | -0.000079 | 0.002685  |
| 323 | -0.000024 | 0.000039  | 0.000006  | 0.000018  | 0.000013  | 0.000007  | 0.000012  | -0.000955 | -0.001494 | 0.000417  | -0.001572 | 0.001340  |
| 324 | -0.000015 | -0.000032 | -0.000011 | -0.000001 | 0.000004  | -0.000010 | -0.000036 | -0.002666 | 0.001078  | 0.001584  | 0.002256  | -0.001820 |
| 325 | 0.000026  | -0.000085 | 0.000008  | 0.000006  | -0.000004 | -0.000001 | -0.000018 | -0.001633 | 0.001657  | 0.003805  | -0.002559 | 0.003993  |
| 326 | -0.000074 | 0.000017  | -0.000034 | 0.000009  | -0.000009 | 0.000010  | 0.000031  | 0.002251  | 0.003666  | -0.002917 | 0.000118  | -0.004740 |
| 327 | -0.000099 | 0.000152  | -0.000028 | 0.000012  | 0.000023  | 0.000029  | 0.000010  | -0.000056 | -0.000569 | -0.000033 | 0.000348  | 0.000307  |
| 328 | 0.000005  | 0.000017  | -0.000010 | 0.000025  | 0.000006  | 0.000044  | -0.000006 | -0.000020 | -0.000030 | 0.000119  | 0.000014  | 0.000018  |
| 329 | -0.000017 | -0.000036 | 0.000004  | -0.000005 | -0.000004 | -0.000003 | 0.000009  | -0.000057 | 0.000006  | -0.000014 | 0.000020  | -0.000024 |
| 330 | 0.000005  | 0.000034  | 0.000001  | 0.000001  | 0.000005  | 0.000000  | 0.000003  | -0.000020 | -0.000001 | 0.000015  | -0.000040 | -0.000028 |
| 331 | 0.000039  | -0.000017 | 0.000007  | 0.000012  | 0.000001  | 0.000013  | -0.000007 | 0.000029  | 0.000011  | 0.000002  | -0.000008 | 0.000041  |
| 332 | -0.000028 | -0.000030 | -0.000020 | -0.000015 | -0.000003 | -0.000017 | -0.000005 | -0.000061 | 0.000023  | -0.000025 | -0.000008 | -0.000074 |



|     |           |           |           |           |           |           |           |           |           |           |           |           |
|-----|-----------|-----------|-----------|-----------|-----------|-----------|-----------|-----------|-----------|-----------|-----------|-----------|
| 333 | -0.000002 | 0.000034  | 0.000017  | -0.000018 | -0.000006 | -0.000037 | 0.000007  | 0.000129  | -0.000009 | -0.000100 | 0.000021  | 0.000065  |
|     | 217       | 218       | 219       | 220       | 221       | 222       | 223       | 224       | 225       | 226       | 227       | 228       |
| 1   | 0.000356  | 0.000176  | -0.000339 | 0.000012  | -0.000104 | 0.000353  | 0.000170  | -0.000593 | 0.000102  | 0.000262  | -0.000738 | 0.000162  |
| 2   | -0.001476 | 0.000552  | 0.001729  | -0.000211 | 0.000000  | -0.001724 | -0.000477 | 0.001597  | 0.000120  | -0.001099 | 0.001751  | 0.001363  |
| 3   | -0.000116 | 0.000169  | 0.000346  | 0.000154  | 0.000302  | -0.000202 | -0.013881 | 0.009470  | -0.007189 | 0.004219  | -0.003703 | 0.008113  |
| 4   | 0.000053  | 0.000118  | 0.000304  | 0.000222  | 0.000372  | 0.000429  | -0.000891 | 0.001115  | -0.000196 | -0.000530 | 0.001305  | 0.000115  |
| 5   | 0.008742  | 0.001041  | 0.000474  | 0.000047  | 0.000718  | -0.000036 | -0.000680 | 0.002097  | -0.000780 | 0.000200  | 0.001495  | -0.000564 |
| 6   | -0.012844 | 0.000696  | 0.000369  | 0.000191  | 0.000199  | 0.002357  | 0.008971  | -0.005929 | 0.005602  | -0.005826 | 0.007012  | -0.012650 |
| 7   | 0.001220  | -0.000119 | -0.000007 | 0.000055  | 0.000189  | 0.000167  | 0.000163  | 0.000360  | -0.000103 | 0.000171  | 0.000089  | -0.000009 |
| 8   | 0.002675  | 0.000273  | 0.000407  | 0.000102  | 0.000418  | 0.000103  | -0.008233 | 0.018819  | -0.013261 | 0.007463  | -0.004912 | 0.030856  |
| 9   | -0.000898 | -0.000229 | -0.000050 | 0.000112  | -0.000022 | -0.000250 | -0.005414 | -0.003779 | 0.000983  | -0.001226 | -0.001491 | -0.012125 |
| 10  | -0.000666 | -0.000208 | 0.000078  | 0.000118  | 0.000101  | -0.000252 | 0.002732  | 0.000600  | 0.001203  | -0.001266 | 0.002456  | 0.002248  |
| 11  | 0.002257  | 0.000209  | 0.000338  | 0.000123  | 0.000473  | 0.000684  | -0.001251 | 0.000357  | -0.001093 | 0.000856  | -0.000525 | -0.000925 |
| 12  | -0.012801 | 0.000239  | -0.000598 | -0.000160 | -0.000439 | 0.000626  | -0.000251 | -0.000643 | 0.000731  | -0.000736 | 0.000207  | -0.000840 |
| 13  | 0.031596  | 0.000100  | 0.001557  | 0.000407  | 0.001668  | -0.002373 | 0.001841  | 0.002988  | -0.001201 | 0.001065  | 0.001079  | 0.002335  |
| 14  | -0.008422 | -0.001010 | 0.001100  | 0.000473  | 0.001159  | 0.001833  | -0.011567 | -0.002304 | -0.000960 | 0.000032  | -0.003726 | -0.005320 |
| 15  | -0.004649 | 0.000473  | -0.000430 | -0.000137 | -0.000616 | 0.000193  | 0.030020  | -0.006630 | 0.008905  | -0.010114 | 0.015270  | -0.006638 |
| 16  | 0.000786  | 0.000285  | -0.000069 | -0.000084 | -0.000057 | 0.000068  | -0.003351 | 0.006057  | -0.008090 | 0.003922  | -0.009828 | 0.022969  |
| 17  | -0.000212 | -0.000384 | 0.000185  | 0.000274  | 0.000186  | -0.000187 | 0.004115  | 0.002817  | 0.000415  | -0.001559 | 0.004290  | 0.001066  |
| 18  | 0.000917  | 0.000261  | 0.000001  | -0.000085 | -0.000030 | 0.000131  | 0.006148  | -0.006644 | 0.003862  | -0.002381 | 0.000784  | -0.009414 |
| 19  | 0.001052  | 0.000105  | -0.000029 | -0.000090 | -0.000028 | 0.000341  | 0.000406  | 0.000690  | -0.000624 | 0.000658  | -0.000783 | 0.001084  |
| 20  | -0.000486 | -0.000215 | 0.000248  | 0.000266  | 0.000269  | -0.000361 | 0.000030  | -0.000240 | 0.000518  | -0.000355 | 0.000770  | -0.000502 |
| 21  | 0.000974  | -0.000023 | -0.000054 | -0.000067 | 0.000016  | 0.000215  | 0.000946  | 0.000417  | -0.000259 | 0.000286  | -0.000148 | 0.001099  |
| 22  | -0.010403 | 0.000156  | 0.000099  | 0.000327  | -0.000144 | -0.000968 | 0.001243  | -0.000315 | 0.000345  | -0.000310 | 0.000494  | 0.000789  |
| 23  | 0.001417  | 0.000409  | 0.000883  | 0.000202  | 0.001166  | 0.002178  | -0.000063 | 0.000667  | -0.000316 | 0.000590  | -0.000209 | -0.000074 |
| 24  | 0.020623  | -0.000814 | -0.000627 | -0.000750 | -0.000744 | -0.000437 | 0.001031  | -0.000670 | 0.000890  | -0.000746 | 0.000448  | 0.000736  |
| 25  | -0.002140 | 0.001022  | -0.000774 | -0.000788 | -0.000641 | -0.000589 | -0.007044 | 0.000271  | -0.002912 | 0.002455  | -0.006591 | 0.004822  |
| 26  | 0.004559  | 0.001737  | 0.001054  | 0.000226  | 0.000863  | 0.000826  | 0.001789  | 0.003863  | -0.001181 | 0.000118  | 0.002496  | 0.004721  |
| 27  | 0.004565  | -0.000797 | -0.000167 | 0.000332  | 0.000050  | 0.000155  | 0.017893  | -0.010354 | 0.005441  | -0.006291 | 0.005870  | -0.002510 |
| 28  | 0.000639  | -0.000308 | -0.000064 | 0.000063  | -0.000054 | -0.000016 | 0.004312  | 0.002616  | 0.000366  | -0.000547 | 0.003449  | 0.004545  |
| 29  | 0.000403  | -0.000033 | 0.000102  | 0.000055  | 0.000062  | -0.000159 | -0.002932 | -0.002536 | -0.000191 | 0.000492  | -0.003019 | -0.003824 |
| 30  | -0.003823 | -0.000511 | -0.000635 | -0.000065 | -0.000558 | -0.001129 | 0.001048  | -0.001684 | 0.001725  | -0.001532 | 0.001556  | 0.000122  |
| 31  | 0.004645  | 0.000314  | 0.000894  | 0.000255  | 0.000986  | 0.001009  | 0.000955  | 0.001308  | -0.001324 | 0.001705  | -0.001746 | 0.000899  |
| 32  | -0.014698 | 0.003809  | -0.000127 | -0.000492 | -0.000131 | 0.002974  | -0.003250 | -0.003048 | 0.000478  | -0.000129 | -0.002827 | -0.003228 |
| 33  | -0.037879 | 0.003847  | -0.000489 | -0.000458 | -0.000126 | 0.004533  | 0.006255  | 0.002135  | 0.000113  | -0.000109 | 0.002012  | 0.004791  |
| 34  | 0.004550  | 0.000996  | 0.000786  | 0.000274  | 0.000729  | 0.000709  | -0.019824 | -0.006233 | 0.001913  | -0.011788 | 0.011530  | -0.038677 |
| 35  | -0.003251 | -0.000888 | -0.000762 | -0.000061 | -0.000697 | -0.000548 | -0.040248 | 0.013395  | -0.015319 | 0.001124  | -0.005834 | -0.016615 |
| 36  | 0.000057  | 0.000015  | 0.000030  | 0.000037  | 0.000010  | -0.000009 | 0.006252  | -0.004375 | 0.003276  | -0.003798 | 0.002158  | -0.001176 |
| 37  | -0.000001 | -0.000014 | 0.000039  | 0.000031  | 0.000011  | -0.000019 | 0.000217  | 0.000321  | 0.000030  | 0.000008  | 0.000373  | 0.000186  |
| 38  | -0.000016 | -0.000037 | 0.000049  | 0.000040  | 0.000024  | -0.000022 | -0.000017 | 0.000100  | 0.000008  | -0.000032 | 0.000081  | 0.000072  |
| 39  | 0.000027  | -0.000010 | 0.000016  | 0.000037  | 0.000060  | 0.000006  | -0.000013 | 0.000078  | 0.000005  | -0.000001 | 0.000011  | 0.000039  |
| 40  | 0.000124  | -0.000025 | 0.000062  | 0.000053  | 0.000138  | 0.000005  | 0.000013  | 0.000043  | 0.000051  | -0.000014 | 0.000021  | 0.000018  |
| 41  | -0.003132 | 0.000169  | -0.000063 | -0.000161 | -0.000082 | 0.002144  | 0.000007  | 0.000095  | 0.000030  | -0.000003 | 0.000030  | 0.000026  |
| 42  | 0.005796  | 0.001933  | -0.000092 | -0.000153 | -0.000054 | 0.000350  | 0.000136  | 0.000400  | 0.000039  | 0.000057  | 0.000290  | 0.000251  |
| 43  | 0.000226  | 0.000042  | 0.000117  | 0.000058  | 0.000077  | 0.000040  | -0.001548 | 0.002437  | -0.003418 | 0.002620  | -0.003352 | 0.005615  |
| 44  | 0.000228  | 0.000024  | 0.000074  | 0.000047  | 0.000069  | -0.000004 | 0.000145  | 0.000175  | -0.000099 | 0.000151  | -0.000070 | 0.000435  |
| 45  | 0.000357  | 0.000052  | 0.000038  | 0.000032  | 0.000069  | 0.000081  | 0.000520  | 0.000074  | -0.000122 | 0.000115  | 0.000425  | 0.000086  |
| 46  | 0.272293  | -0.002820 | 0.003738  | 0.000477  | 0.003864  | -0.001174 | 0.000336  | -0.000093 | 0.000151  | -0.000048 | 0.000231  | 0.000206  |

|    |           |           |           |           |           |           |           |           |           |           |           |           |
|----|-----------|-----------|-----------|-----------|-----------|-----------|-----------|-----------|-----------|-----------|-----------|-----------|
| 47 | 0.000373  | 0.000032  | 0.000007  | 0.000001  | -0.000007 | -0.000054 | 0.282959  | -0.003836 | -0.016392 | -0.015473 | -0.005360 | 0.278637  |
| 48 | -0.000303 | 0.000200  | -0.000034 | 0.000026  | -0.000268 | 0.000406  | 0.000059  | -0.000199 | 0.000102  | -0.000084 | -0.000433 | 0.000188  |
| 49 | 0.000153  | -0.000125 | -0.000002 | 0.000034  | 0.000305  | 0.000092  | 0.000039  | 0.000149  | -0.000427 | -0.000115 | 0.000148  | -0.000272 |
| 50 | -0.000459 | 0.000090  | 0.000176  | 0.000203  | 0.000173  | -0.000083 | -0.000365 | 0.000271  | -0.000374 | -0.000171 | 0.000433  | -0.000432 |
| 51 | 0.000338  | -0.000082 | 0.000152  | 0.000157  | 0.000168  | 0.000082  | 0.000912  | 0.000700  | -0.000516 | 0.000108  | 0.000607  | 0.000098  |
| 52 | -0.000321 | 0.000153  | -0.000205 | -0.000185 | -0.000402 | -0.000158 | -0.000244 | -0.000957 | -0.000114 | -0.000090 | -0.000998 | -0.000298 |
| 53 | -0.000681 | 0.000020  | 0.000036  | 0.000084  | 0.000101  | 0.000283  | 0.000028  | 0.000083  | -0.000023 | -0.000037 | 0.000039  | 0.000018  |
| 54 | 0.000043  | -0.000029 | 0.000014  | -0.000002 | 0.000036  | 0.000013  | 0.000010  | 0.000063  | -0.000041 | -0.000011 | 0.000034  | -0.000028 |
| 55 | 0.000073  | 0.000011  | -0.000167 | -0.000200 | -0.000137 | 0.000116  | 0.000063  | -0.000528 | -0.000413 | -0.000066 | -0.000375 | -0.000231 |
| 56 | -0.000048 | -0.000007 | 0.000027  | 0.000039  | 0.000034  | 0.000001  | 0.000019  | 0.000071  | -0.000194 | 0.000111  | 0.000173  | -0.000245 |
| 57 | -0.000022 | 0.000005  | 0.000001  | 0.000000  | -0.000014 | -0.000019 | 0.000063  | 0.000125  | 0.000000  | 0.000011  | 0.000050  | 0.000000  |
| 58 | 0.000011  | -0.000017 | 0.000024  | 0.000048  | 0.000043  | -0.000035 | 0.000091  | 0.000235  | -0.000035 | 0.000012  | 0.000163  | 0.000006  |
| 59 | -0.000003 | -0.000012 | 0.000046  | 0.000058  | 0.000050  | -0.000038 | -0.000058 | 0.000063  | 0.000111  | 0.000017  | 0.000052  | 0.000082  |
| 60 | 0.000359  | -0.001129 | 0.000011  | 0.000132  | 0.000038  | 0.000091  | -0.000011 | 0.000116  | -0.000049 | 0.000027  | -0.000039 | 0.000142  |
| 61 | 0.001744  | 0.000766  | -0.000110 | -0.000169 | 0.000023  | -0.000384 | -0.001853 | -0.000457 | 0.000494  | 0.000046  | 0.000767  | -0.000920 |
| 62 | -0.002617 | 0.000385  | 0.000299  | 0.000146  | 0.000089  | 0.000317  | 0.001474  | 0.001051  | -0.000247 | -0.000224 | 0.000606  | 0.000952  |
| 63 | -0.001956 | -0.001604 | 0.000133  | 0.000357  | -0.000031 | 0.000181  | 0.000615  | 0.001012  | -0.000442 | -0.000079 | 0.000838  | -0.001513 |
| 64 | 0.000105  | -0.000615 | -0.000120 | 0.000033  | 0.000033  | 0.000080  | -0.001151 | -0.000629 | 0.000343  | -0.000076 | 0.000552  | 0.000799  |
| 65 | 0.000549  | 0.000765  | -0.000069 | -0.000172 | -0.000228 | 0.000116  | 0.000019  | -0.000445 | 0.000955  | -0.000433 | -0.001461 | 0.002623  |
| 66 | -0.001861 | 0.000159  | 0.000159  | 0.000219  | -0.000173 | 0.000623  | 0.000541  | -0.000493 | -0.000089 | 0.000833  | -0.000005 | -0.000882 |
| 67 | -0.000556 | 0.000121  | 0.000047  | -0.000020 | 0.000233  | 0.000132  | 0.001067  | -0.000107 | -0.001023 | 0.000416  | -0.000077 | -0.000392 |
| 68 | 0.004285  | 0.000114  | -0.000334 | -0.000405 | 0.000053  | -0.000989 | -0.000631 | -0.000012 | 0.000087  | -0.000525 | -0.001183 | -0.000725 |
| 69 | 0.001288  | -0.000455 | -0.000090 | 0.000051  | -0.000096 | -0.000400 | 0.001376  | 0.000851  | -0.000433 | 0.000892  | -0.000747 | 0.003196  |
| 70 | 0.003374  | -0.000553 | 0.000090  | 0.000049  | 0.000134  | -0.000530 | 0.002309  | -0.000959 | 0.000779  | 0.000352  | -0.000858 | 0.001473  |
| 71 | -0.005749 | 0.001508  | 0.000006  | -0.000196 | -0.000031 | 0.001318  | 0.003693  | -0.001037 | 0.001332  | -0.000098 | 0.000142  | 0.001846  |
| 72 | 0.001308  | -0.000394 | -0.000024 | 0.000061  | -0.000016 | -0.000400 | -0.007285 | 0.001049  | -0.001685 | -0.001120 | 0.001215  | -0.006456 |
| 73 | 0.000243  | 0.000288  | 0.000011  | -0.000156 | -0.000003 | -0.000015 | -0.023436 | 0.004882  | -0.007418 | 0.003843  | -0.008530 | 0.000390  |
| 74 | 0.000507  | -0.000090 | 0.000065  | 0.000067  | 0.000096  | -0.000019 | -0.001728 | 0.006933  | -0.003667 | 0.003315  | -0.000250 | 0.010989  |
| 75 | 0.000642  | -0.000019 | 0.000066  | 0.000047  | 0.000082  | -0.000016 | 0.001045  | 0.001986  | -0.001416 | 0.001037  | -0.000902 | 0.003408  |
| 76 | -0.000789 | 0.000207  | -0.000086 | -0.000098 | -0.000107 | 0.000085  | 0.005560  | -0.008456 | 0.005084  | -0.003758 | 0.002323  | -0.012353 |
| 77 | -0.001127 | 0.000269  | -0.000109 | -0.000099 | -0.000116 | 0.000241  | -0.000341 | 0.000625  | -0.000280 | -0.000306 | 0.000274  | 0.000749  |
| 78 | 0.000653  | -0.000034 | 0.000097  | 0.000037  | 0.000115  | 0.000042  | 0.000647  | 0.000211  | 0.000016  | 0.000183  | 0.000123  | 0.000414  |
| 79 | 0.000489  | -0.000074 | 0.000125  | 0.000066  | 0.000115  | -0.000067 | 0.000851  | 0.000162  | 0.000132  | 0.000033  | 0.000350  | 0.000594  |
| 80 | 0.000602  | 0.000145  | -0.000130 | -0.000106 | -0.000037 | 0.000443  | -0.001226 | -0.000406 | -0.000200 | -0.000370 | 0.000208  | -0.001272 |
| 81 | -0.013303 | 0.000254  | -0.000317 | 0.000044  | -0.000519 | 0.000250  | -0.001464 | 0.000237  | -0.000602 | -0.000004 | -0.000227 | -0.001049 |
| 82 | 0.003425  | -0.000053 | 0.000418  | 0.000210  | 0.000283  | -0.000508 | 0.000938  | 0.000221  | 0.000135  | 0.000068  | 0.000169  | 0.000731  |
| 83 | 0.011489  | -0.000375 | 0.000405  | 0.000090  | 0.000557  | -0.000302 | 0.000707  | 0.000086  | 0.000275  | -0.000066 | 0.000144  | 0.000614  |
| 84 | 0.001366  | 0.000395  | -0.000972 | -0.000336 | -0.000795 | -0.002590 | -0.000604 | 0.001111  | -0.000552 | 0.000052  | 0.000852  | -0.000167 |
| 85 | -0.022267 | -0.001499 | -0.001070 | -0.000269 | -0.001146 | 0.001138  | -0.010749 | 0.002029  | -0.004382 | 0.003399  | -0.007349 | 0.003599  |
| 86 | -0.001154 | -0.000417 | 0.000425  | 0.000075  | 0.000332  | -0.000063 | 0.003945  | -0.001191 | 0.001131  | -0.001177 | 0.001440  | 0.001225  |
| 87 | 0.000951  | -0.000340 | 0.000249  | 0.000185  | 0.000312  | 0.000149  | 0.009435  | -0.000284 | 0.003821  | -0.002408 | 0.006387  | -0.000860 |
| 88 | 0.003823  | 0.000018  | -0.000344 | 0.000065  | -0.000244 | -0.000154 | 0.000079  | -0.009275 | 0.004447  | -0.005861 | 0.002813  | -0.022281 |
| 89 | -0.000005 | -0.000149 | -0.000080 | 0.000025  | -0.000074 | -0.000148 | -0.000985 | -0.000734 | 0.000135  | -0.000050 | -0.000533 | -0.001580 |
| 90 | -0.001466 | -0.000121 | -0.000003 | 0.000126  | -0.000008 | -0.000544 | 0.000177  | -0.000416 | 0.000122  | 0.000110  | -0.000392 | 0.000000  |
| 91 | -0.007943 | -0.003577 | -0.002974 | -0.000900 | -0.003127 | -0.004701 | -0.000729 | -0.000777 | 0.000097  | -0.000049 | -0.000898 | -0.000993 |
| 92 | -0.001101 | -0.000388 | -0.000050 | 0.000147  | -0.000022 | 0.000024  | -0.009432 | -0.012735 | 0.003761  | 0.004182  | -0.012742 | -0.008657 |
| 93 | -0.000219 | 0.000052  | -0.000021 | -0.000027 | -0.000039 | 0.000008  | 0.002650  | -0.002957 | 0.002299  | -0.002472 | 0.001715  | 0.000998  |
| 94 | -0.000287 | 0.000039  | -0.000044 | -0.000041 | -0.000057 | 0.000011  | -0.000922 | -0.003974 | 0.001367  | -0.000839 | -0.001470 | -0.011986 |
| 95 | -0.000307 | 0.000012  | -0.000040 | -0.000028 | -0.000043 | 0.000009  | -0.000372 | -0.000822 | 0.000726  | -0.000410 | 0.000750  | -0.001692 |
| 96 | -0.000320 | 0.000007  | -0.000027 | -0.000018 | -0.000040 | 0.000003  | -0.000625 | -0.001158 | 0.000700  | -0.000592 | 0.000118  | -0.001680 |

|     |           |           |           |           |           |           |           |           |           |           |           |           |
|-----|-----------|-----------|-----------|-----------|-----------|-----------|-----------|-----------|-----------|-----------|-----------|-----------|
| 97  | -0.000317 | 0.000016  | -0.000054 | -0.000016 | -0.000065 | -0.000015 | -0.000318 | -0.000077 | 0.000012  | -0.000089 | -0.000032 | -0.000173 |
| 98  | -0.000334 | 0.000018  | -0.000043 | -0.000020 | -0.000050 | -0.000029 | -0.000325 | -0.000136 | -0.000027 | -0.000093 | -0.000095 | -0.000236 |
| 99  | -0.000283 | 0.000048  | -0.000064 | -0.000042 | -0.000068 | 0.000023  | -0.000429 | -0.000088 | -0.000076 | -0.000028 | -0.000178 | -0.000292 |
| 100 | -0.000201 | 0.000023  | -0.000061 | -0.000023 | -0.000047 | 0.000042  | -0.000420 | -0.000073 | -0.000061 | -0.000007 | -0.000171 | -0.000300 |
| 101 | -0.001761 | 0.000046  | -0.000240 | -0.000130 | -0.000227 | 0.000210  | -0.000470 | -0.000120 | -0.000070 | -0.000033 | -0.000091 | -0.000374 |
| 102 | -0.001666 | 0.000017  | -0.000176 | -0.000075 | -0.000063 | 0.000266  | -0.000477 | -0.000096 | -0.000062 | -0.000032 | -0.000084 | -0.000347 |
| 103 | -0.012381 | 0.000493  | 0.000002  | 0.000280  | 0.000114  | -0.000133 | -0.000346 | -0.000114 | -0.000170 | 0.000054  | -0.000053 | -0.000357 |
| 104 | 0.000889  | -0.000114 | -0.000407 | -0.000370 | -0.000671 | 0.000424  | -0.000363 | 0.000029  | -0.000105 | 0.000012  | -0.000088 | -0.000257 |
| 105 | 0.003134  | 0.000577  | -0.000561 | -0.000370 | -0.000404 | -0.000278 | -0.001966 | 0.000281  | -0.000663 | 0.000534  | -0.000915 | -0.000717 |
| 106 | -0.001981 | -0.000172 | 0.000135  | 0.000295  | 0.000073  | 0.000349  | -0.001964 | 0.000912  | -0.000479 | 0.000639  | -0.000539 | -0.000511 |
| 107 | -0.000421 | 0.000181  | -0.000053 | -0.000063 | -0.000128 | -0.000078 | -0.011085 | -0.001301 | -0.001466 | 0.000679  | -0.003892 | -0.002064 |
| 108 | -0.000543 | 0.000169  | -0.000195 | -0.000121 | -0.000187 | -0.000081 | 0.001641  | 0.001559  | -0.002333 | 0.001717  | -0.002476 | 0.002927  |
| 109 | -0.000059 | 0.000074  | -0.000075 | -0.000022 | -0.000031 | 0.000064  | 0.000141  | 0.000458  | -0.000293 | 0.000092  | 0.000615  | 0.000637  |
| 110 | 0.000068  | 0.000075  | 0.000156  | -0.000003 | 0.000104  | 0.000083  | 0.000864  | 0.000266  | 0.000171  | -0.000045 | -0.000092 | 0.000948  |
| 111 | 0.000753  | 0.000077  | -0.000081 | -0.000087 | -0.000048 | 0.000355  | -0.000546 | 0.000278  | -0.000319 | 0.000084  | 0.000309  | -0.000041 |
| 112 | 0.000690  | 0.000034  | 0.000086  | -0.000035 | 0.000054  | 0.000179  | 0.000363  | 0.000144  | 0.000191  | -0.000189 | 0.000091  | 0.000047  |
| 113 | 0.012868  | 0.002799  | 0.002575  | 0.000355  | 0.001208  | 0.000176  | 0.000218  | 0.000577  | -0.000084 | 0.000054  | 0.000591  | 0.000521  |
| 114 | -0.004969 | 0.000799  | 0.000412  | 0.000543  | 0.001917  | 0.004493  | 0.000537  | 0.000188  | -0.000011 | -0.000015 | 0.000297  | 0.000475  |
| 115 | 0.000448  | 0.000319  | 0.000087  | -0.000027 | 0.000036  | 0.000095  | 0.011667  | -0.006437 | 0.010342  | -0.012652 | 0.015426  | -0.001539 |
| 116 | 0.000651  | 0.000065  | -0.000038 | -0.000117 | -0.000017 | -0.000120 | -0.002173 | 0.019445  | -0.014419 | 0.008790  | -0.002801 | 0.010007  |
| 117 | 0.001711  | -0.000080 | -0.000071 | -0.000079 | 0.000336  | 0.000165  | -0.000519 | 0.000195  | -0.000431 | -0.000072 | 0.000297  | -0.000789 |
| 118 | -0.000269 | 0.000168  | 0.000061  | 0.000104  | 0.000061  | 0.000185  | -0.000456 | 0.000023  | -0.000067 | -0.000133 | 0.000077  | -0.000273 |
| 119 | -0.000408 | -0.000056 | 0.000102  | 0.000104  | 0.000284  | -0.000158 | -0.000226 | 0.000126  | -0.000168 | -0.000070 | 0.000362  | -0.000346 |
| 120 | -0.000357 | 0.000114  | -0.000023 | 0.000002  | -0.000080 | -0.000027 | -0.000151 | -0.000291 | -0.000028 | -0.000031 | -0.000245 | -0.000165 |
| 121 | 0.000179  | -0.000096 | 0.000004  | -0.000001 | 0.000098  | 0.000008  | 0.000082  | 0.000164  | 0.000015  | 0.000012  | 0.000125  | 0.000081  |
| 122 | 0.000182  | -0.000018 | 0.000019  | -0.000001 | -0.000017 | 0.000018  | 0.000071  | 0.000130  | 0.000012  | 0.000018  | 0.000120  | 0.000084  |
| 123 | -0.000142 | 0.000091  | -0.000025 | -0.000030 | -0.000134 | 0.000056  | -0.000179 | -0.000218 | 0.000092  | -0.000041 | -0.000203 | -0.000093 |
| 124 | 0.000089  | -0.000068 | -0.000003 | 0.000005  | 0.000095  | -0.000012 | -0.000109 | 0.000100  | -0.000041 | -0.000067 | 0.000053  | -0.000002 |
| 125 | 0.000047  | -0.000022 | 0.000029  | 0.000025  | 0.000038  | -0.000043 | 0.000283  | 0.000113  | -0.000047 | 0.000110  | 0.000151  | 0.000096  |
| 126 | -0.000142 | 0.000042  | 0.000140  | 0.000117  | 0.000117  | -0.000098 | 0.000099  | 0.000241  | -0.000268 | 0.000103  | 0.000514  | -0.000308 |
| 127 | -0.000270 | 0.000073  | 0.000074  | 0.000075  | 0.000013  | -0.000147 | -0.000215 | 0.000040  | -0.000113 | -0.000127 | 0.000077  | -0.000239 |
| 128 | -0.000045 | 0.000035  | 0.000001  | -0.000006 | -0.000024 | 0.000007  | -0.000028 | -0.000069 | -0.000033 | 0.000020  | -0.000045 | -0.000062 |
| 129 | 0.000039  | -0.000023 | 0.000012  | 0.000011  | 0.000035  | 0.000003  | 0.000028  | 0.000124  | -0.000101 | -0.000048 | 0.000053  | -0.000008 |
| 130 | 0.000037  | -0.000025 | 0.000004  | 0.000021  | 0.000025  | -0.000015 | 0.000019  | 0.000112  | 0.000051  | 0.000007  | 0.000068  | 0.000052  |
| 131 | -0.000008 | 0.000012  | 0.000002  | -0.000004 | -0.000016 | -0.000002 | 0.000115  | 0.000147  | -0.000019 | 0.000020  | 0.000049  | -0.000006 |
| 132 | -0.000008 | 0.000008  | -0.000002 | -0.000007 | -0.000016 | -0.000001 | -0.000093 | -0.000181 | 0.000011  | -0.000012 | -0.000028 | -0.000022 |
| 133 | -0.000016 | -0.000007 | -0.000018 | -0.000015 | -0.000005 | 0.000008  | -0.000040 | -0.000136 | 0.000091  | 0.000013  | -0.000098 | 0.000044  |
| 134 | 0.000073  | -0.000067 | 0.000099  | 0.000041  | 0.000045  | 0.000088  | 0.001576  | -0.000432 | 0.000784  | 0.001201  | -0.002064 | 0.000418  |
| 135 | 0.000363  | 0.000118  | 0.000005  | -0.000039 | 0.000075  | 0.000017  | -0.003909 | -0.002263 | 0.004394  | -0.000623 | 0.001370  | -0.000157 |
| 136 | 0.000394  | 0.000053  | -0.000019 | -0.000035 | 0.000020  | 0.000054  | 0.000410  | 0.001026  | -0.000743 | 0.001662  | -0.001934 | 0.000144  |
| 137 | 0.000546  | -0.000017 | -0.000020 | 0.000002  | -0.000033 | -0.000153 | 0.001703  | 0.000192  | 0.000387  | 0.001233  | -0.001216 | 0.001254  |
| 138 | 0.000445  | -0.000080 | -0.000003 | 0.000018  | -0.000049 | -0.000162 | 0.002913  | -0.000800 | 0.001337  | -0.000146 | -0.000489 | -0.000875 |
| 139 | 0.000572  | -0.000075 | -0.000018 | 0.000022  | -0.000004 | 0.000067  | -0.000062 | -0.000366 | 0.000314  | 0.000271  | -0.000390 | -0.000390 |
| 140 | 0.000407  | -0.000077 | 0.000009  | 0.000032  | -0.000037 | -0.000184 | 0.000894  | -0.000401 | 0.000391  | 0.000173  | -0.000669 | 0.000507  |
| 141 | 0.000240  | 0.000045  | -0.000032 | -0.000001 | -0.000043 | -0.000131 | 0.000428  | -0.000281 | 0.000120  | 0.000075  | -0.000466 | 0.000596  |
| 142 | -0.000284 | 0.000135  | 0.000011  | -0.000037 | 0.000037  | 0.000134  | -0.000078 | -0.000083 | 0.000239  | 0.000050  | -0.000030 | -0.000086 |
| 143 | 0.000029  | 0.000245  | -0.000023 | -0.000078 | 0.000069  | 0.000064  | -0.000351 | -0.000068 | 0.000229  | -0.000058 | 0.000004  | -0.000379 |
| 144 | 0.000221  | 0.000767  | -0.000161 | -0.000365 | 0.000086  | -0.000709 | 0.000978  | -0.000496 | -0.000147 | -0.000443 | -0.000034 | -0.000080 |
| 145 | 0.002324  | 0.000436  | -0.000111 | -0.000213 | 0.000393  | 0.000075  | 0.000170  | -0.000278 | -0.000055 | -0.000132 | 0.000350  | -0.000532 |
| 146 | 0.000112  | -0.000254 | -0.000043 | -0.000152 | 0.000210  | 0.000847  | 0.000265  | -0.000141 | -0.000071 | -0.000091 | 0.000177  | -0.000253 |

|     |           |           |           |           |           |           |           |           |           |           |           |            |
|-----|-----------|-----------|-----------|-----------|-----------|-----------|-----------|-----------|-----------|-----------|-----------|------------|
| 147 | 0.000469  | -0.000735 | -0.000120 | -0.000053 | 0.000024  | 0.001504  | 0.000217  | -0.000133 | -0.000045 | 0.000038  | -0.000414 | -0.000002  |
| 148 | 0.001850  | -0.000737 | 0.000229  | -0.000099 | -0.000272 | -0.000933 | 0.001336  | -0.000384 | 0.000016  | -0.000534 | -0.000438 | -0.000204  |
| 149 | -0.000951 | 0.000811  | 0.000008  | -0.000200 | 0.000145  | -0.000357 | 0.002385  | 0.000457  | -0.001856 | -0.000621 | -0.001818 | 0.001737   |
| 150 | -0.003529 | 0.000329  | 0.000270  | -0.000239 | -0.000267 | 0.000519  | 0.003477  | -0.001042 | 0.000058  | -0.001198 | -0.000663 | -0.000321  |
| 151 | -0.000027 | -0.001149 | -0.000107 | 0.000057  | 0.000121  | 0.000833  | 0.001439  | 0.000191  | -0.001098 | -0.000468 | -0.001320 | -0.000255  |
| 152 | 0.000662  | -0.000541 | -0.000092 | -0.000039 | 0.000167  | 0.000562  | 0.000570  | 0.001448  | -0.001178 | 0.000638  | -0.000977 | -0.000167  |
| 153 | 0.000818  | 0.000199  | -0.000085 | -0.000035 | 0.000283  | 0.000096  | 0.001091  | -0.002760 | 0.001249  | -0.004540 | 0.001706  | 0.005260   |
| 154 | 0.000218  | -0.000019 | 0.000025  | 0.000001  | -0.000004 | -0.000073 | 0.001037  | -0.000491 | 0.000650  | -0.000131 | -0.000487 | 0.000226   |
| 155 | 0.000632  | 0.000275  | -0.000039 | -0.000116 | 0.000087  | 0.000254  | 0.000184  | -0.000202 | 0.000180  | -0.000162 | -0.000214 | -0.000174  |
| 156 | -0.002648 | 0.001340  | 0.000844  | -0.000157 | -0.000119 | -0.001938 | 0.001607  | -0.000744 | 0.000105  | -0.000595 | -0.000618 | 0.000216   |
| 157 | 0.000032  | 0.000119  | 0.000047  | -0.000086 | 0.000123  | 0.000021  | -0.002226 | -0.009340 | 0.010603  | -0.010610 | 0.003661  | 0.006162   |
| 158 | -0.000205 | 0.000010  | 0.000033  | 0.000050  | -0.000007 | -0.000111 | 0.000315  | 0.000018  | -0.000013 | 0.000075  | -0.000019 | -0.000034  |
| 159 | -0.001001 | 0.000144  | 0.000031  | 0.000106  | -0.000062 | 0.000176  | -0.000774 | -0.000864 | 0.000485  | 0.000328  | 0.000124  | 0.000070   |
| 160 | -0.000734 | 0.000105  | 0.000011  | 0.000074  | -0.000062 | 0.000162  | -0.000756 | -0.000796 | 0.000529  | 0.000319  | 0.000112  | 0.000100   |
| 161 | 0.000258  | -0.000020 | -0.000031 | -0.000026 | -0.000012 | -0.000057 | 0.000120  | -0.000192 | 0.000103  | -0.000066 | -0.000053 | 0.000065   |
| 162 | -0.000026 | -0.000247 | 0.000003  | -0.000016 | -0.000009 | -0.000039 | 0.000052  | -0.000024 | 0.000037  | -0.000079 | 0.000026  | 0.000024   |
| 163 | 0.001307  | -0.000052 | -0.000139 | -0.000168 | -0.000027 | -0.000223 | -0.001013 | -0.000641 | 0.000393  | -0.000107 | -0.000035 | 0.000216   |
| 164 | 0.000548  | 0.000099  | -0.000024 | -0.000059 | 0.000021  | 0.000028  | -0.005971 | -0.000278 | -0.001189 | -0.000690 | 0.000060  | 0.000287   |
| 165 | 0.000030  | 0.000006  | -0.000007 | 0.000002  | -0.000005 | -0.000036 | 0.001496  | -0.000221 | 0.001155  | 0.000832  | -0.000541 | -0.000015  |
| 166 | -0.000778 | 0.000035  | 0.000026  | 0.000000  | 0.000072  | 0.000228  | -0.001020 | -0.000676 | 0.001073  | -0.001132 | 0.001824  | -0.0001920 |
| 167 | 0.000302  | 0.000075  | -0.000023 | 0.000011  | -0.000070 | -0.000180 | 0.000614  | -0.000390 | 0.000336  | 0.000094  | -0.000816 | 0.000948   |
| 168 | -0.000076 | -0.000017 | 0.000018  | 0.000007  | 0.000014  | 0.000043  | 0.000077  | 0.000001  | 0.000044  | 0.000046  | 0.000060  | -0.000084  |
| 169 | 0.000286  | -0.000285 | 0.000003  | 0.000068  | -0.000044 | -0.000177 | 0.000237  | 0.000107  | -0.000368 | -0.000014 | 0.000116  | 0.000024   |
| 170 | 0.001537  | -0.000325 | -0.000068 | 0.000069  | -0.000114 | -0.000740 | -0.000046 | 0.000105  | 0.000120  | 0.000128  | -0.000296 | 0.001080   |
| 171 | -0.000299 | 0.000157  | 0.000029  | 0.000206  | -0.000213 | -0.001245 | -0.000264 | 0.000039  | -0.000043 | 0.000292  | -0.000091 | 0.000210   |
| 172 | 0.002000  | -0.000202 | -0.000223 | -0.000168 | 0.000575  | 0.002137  | -0.000667 | 0.000274  | 0.000111  | 0.000163  | 0.000495  | 0.000307   |
| 173 | -0.005777 | 0.002117  | 0.000513  | -0.000208 | -0.000225 | -0.000392 | 0.001352  | 0.000118  | -0.001075 | 0.000591  | -0.001847 | 0.001197   |
| 174 | 0.001662  | -0.001109 | -0.000121 | 0.000012  | 0.000033  | 0.000489  | -0.000678 | -0.000459 | 0.000799  | 0.000822  | 0.000506  | 0.001556   |
| 175 | 0.000855  | -0.000385 | -0.000075 | 0.000114  | -0.000154 | -0.000107 | 0.001687  | 0.001622  | -0.001269 | -0.000320 | -0.000629 | -0.006527  |
| 176 | 0.000085  | -0.000067 | -0.000041 | 0.000032  | -0.000147 | -0.000419 | 0.001427  | -0.000918 | 0.001137  | -0.000365 | -0.000600 | 0.002107   |
| 177 | -0.001088 | 0.000227  | 0.000138  | -0.000025 | 0.000187  | 0.000514  | -0.000715 | 0.000407  | 0.000775  | 0.000262  | 0.000194  | -0.001406  |
| 178 | -0.001604 | -0.000016 | 0.000195  | 0.000028  | 0.000152  | 0.000543  | -0.001139 | 0.000641  | -0.000107 | 0.000217  | 0.001096  | -0.001470  |
| 179 | 0.000829  | -0.000435 | -0.000111 | 0.000147  | -0.000290 | -0.000025 | 0.000610  | -0.000497 | 0.000060  | 0.000035  | -0.001015 | 0.000404   |
| 180 | 0.018279  | -0.000726 | -0.001320 | 0.000211  | 0.000742  | -0.000052 | -0.001165 | 0.000290  | 0.000135  | 0.000773  | -0.000874 | 0.001072   |
| 181 | -0.017934 | 0.001008  | 0.001360  | -0.000405 | -0.000602 | -0.000172 | -0.001954 | 0.000906  | -0.000622 | 0.001790  | -0.000092 | 0.001282   |
| 182 | 0.002003  | 0.000336  | -0.000120 | -0.000090 | 0.000125  | 0.000047  | 0.013432  | 0.002205  | -0.002759 | 0.000749  | 0.002101  | -0.020548  |
| 183 | 0.000702  | -0.000089 | -0.000073 | 0.000005  | -0.000082 | -0.000581 | -0.012180 | -0.001541 | -0.000770 | -0.003584 | -0.001797 | 0.019852   |
| 184 | -0.000323 | 0.000041  | -0.000023 | 0.000018  | -0.000073 | 0.000184  | -0.000664 | -0.000711 | 0.000464  | 0.000366  | 0.000185  | 0.000130   |
| 185 | -0.001349 | 0.000190  | 0.000038  | 0.000132  | -0.000040 | 0.000331  | -0.001084 | -0.000920 | 0.000413  | 0.000329  | 0.000268  | -0.000001  |
| 186 | 0.000052  | -0.000002 | 0.000034  | 0.000007  | 0.000016  | -0.000030 | 0.000136  | 0.000266  | -0.000096 | -0.000004 | 0.000035  | -0.000032  |
| 187 | 0.001059  | -0.000181 | -0.000054 | -0.000102 | 0.000025  | -0.000356 | 0.001149  | 0.000730  | -0.000427 | -0.000292 | -0.000336 | -0.000028  |
| 188 | 0.000610  | -0.000055 | 0.000004  | -0.000057 | 0.000077  | -0.000141 | 0.000507  | 0.000668  | -0.000377 | -0.000408 | -0.000150 | -0.000080  |
| 189 | 0.000004  | 0.000009  | 0.000009  | 0.000009  | 0.000002  | -0.000001 | -0.000031 | -0.000041 | -0.000062 | -0.000049 | -0.000011 | -0.000028  |
| 190 | -0.000051 | -0.000009 | 0.000047  | 0.000041  | 0.000018  | -0.000037 | 0.000228  | 0.000130  | -0.000083 | 0.000105  | 0.000166  | 0.000354   |
| 191 | -0.000166 | 0.000000  | 0.000121  | 0.000079  | 0.000099  | 0.000000  | 0.000065  | 0.000438  | 0.000116  | 0.000049  | 0.000118  | 0.000247   |
| 192 | 0.000086  | -0.000014 | 0.000001  | 0.000012  | 0.000019  | 0.000024  | -0.000043 | -0.000026 | 0.000073  | 0.000008  | 0.000006  | -0.000032  |
| 193 | 0.000027  | -0.000032 | -0.000001 | 0.000025  | -0.000003 | -0.000034 | 0.000118  | 0.000113  | -0.000019 | 0.000072  | 0.000119  | 0.000133   |
| 194 | 0.000098  | -0.000006 | 0.000068  | 0.000077  | 0.000054  | -0.000061 | 0.000114  | 0.000225  | -0.000005 | 0.000040  | 0.000222  | 0.000298   |
| 195 | 0.000389  | 0.000001  | 0.000065  | 0.000045  | 0.000067  | 0.000039  | 0.000448  | 0.000044  | -0.000118 | 0.000213  | 0.000405  | 0.000146   |
| 196 | 0.000007  | -0.000006 | -0.000008 | -0.000006 | -0.000013 | 0.000010  | -0.000030 | 0.000025  | -0.000018 | -0.000004 | -0.000081 | 0.000016   |

|     |           |           |           |           |           |           |           |           |           |           |           |           |
|-----|-----------|-----------|-----------|-----------|-----------|-----------|-----------|-----------|-----------|-----------|-----------|-----------|
| 197 | 0.000042  | -0.000020 | 0.000025  | 0.000039  | 0.000044  | -0.000003 | 0.000027  | 0.000109  | 0.000008  | 0.000039  | 0.000071  | 0.000061  |
| 198 | 0.000028  | -0.000004 | 0.000041  | 0.000050  | 0.000046  | -0.000015 | 0.000039  | 0.000099  | 0.000034  | 0.000047  | 0.000078  | 0.000046  |
| 199 | 0.000058  | -0.000010 | 0.000056  | 0.000039  | 0.000039  | -0.000017 | 0.000042  | 0.000130  | -0.000010 | 0.000021  | 0.000100  | 0.000050  |
| 200 | 0.000020  | 0.000002  | 0.000015  | -0.000012 | -0.000025 | 0.000005  | 0.000038  | -0.000014 | -0.000045 | 0.000011  | 0.000034  | 0.000088  |
| 201 | 0.000368  | 0.000034  | 0.000033  | 0.000022  | 0.000043  | 0.000029  | 0.000403  | -0.000108 | -0.000102 | 0.000102  | 0.000210  | -0.000006 |
| 202 | 0.000086  | -0.000002 | 0.000121  | 0.000094  | 0.000137  | 0.000006  | 0.000016  | 0.000282  | -0.000052 | 0.000042  | 0.000253  | 0.000059  |
| 203 | -0.000113 | -0.000029 | 0.000002  | 0.000023  | 0.000003  | -0.000012 | -0.000052 | 0.000009  | -0.000009 | 0.000007  | 0.000149  | -0.000060 |
| 204 | 0.000137  | -0.000012 | 0.000025  | 0.000040  | 0.000042  | 0.000019  | 0.000120  | -0.000054 | -0.000036 | 0.000083  | -0.000040 | 0.000008  |
| 205 | 0.000264  | -0.000049 | 0.000045  | 0.000080  | 0.000112  | 0.000027  | 0.000028  | 0.000275  | 0.000233  | -0.000202 | -0.000076 | 0.000336  |
| 206 | 0.000274  | 0.000027  | 0.000037  | 0.000035  | 0.000118  | 0.000166  | -0.000093 | 0.000290  | 0.000043  | -0.000060 | 0.000118  | 0.000086  |
| 207 | -0.000006 | 0.000031  | -0.000009 | -0.000021 | -0.000027 | -0.000016 | 0.000010  | -0.000029 | -0.000005 | -0.000007 | -0.000027 | 0.000005  |
| 208 | 0.000015  | -0.000018 | 0.000067  | 0.000054  | 0.000033  | -0.000047 | 0.000057  | 0.000069  | 0.000004  | 0.000012  | 0.000091  | 0.000046  |
| 209 | 0.000028  | -0.000031 | 0.000046  | 0.000048  | 0.000050  | -0.000023 | 0.000008  | 0.000068  | 0.000019  | 0.000003  | 0.000065  | 0.000029  |
| 210 | 0.000050  | -0.000053 | 0.000019  | 0.000062  | 0.000093  | 0.000018  | 0.000050  | 0.000103  | 0.000016  | 0.000011  | 0.000103  | 0.000047  |
| 211 | 0.000082  | -0.000006 | -0.000047 | -0.000022 | 0.000043  | 0.000064  | -0.000036 | 0.000019  | 0.000029  | -0.000026 | -0.000052 | 0.000025  |
| 212 | 0.242687  | 0.082311  | -0.010876 | -0.004916 | -0.004389 | -0.007820 | 0.000441  | 0.000171  | 0.000096  | -0.000003 | 0.000161  | 0.000309  |
| 213 | 0.088110  | 0.082005  | 0.089434  | -0.006734 | -0.005466 | -0.005074 | 0.000135  | 0.000216  | 0.000169  | 0.000005  | 0.000226  | 0.000059  |
| 214 | 1.194200  | -0.006714 | 0.090315  | 0.089841  | -0.007161 | -0.001250 | 0.000084  | 0.000119  | 0.000009  | 0.000066  | 0.000101  | -0.000026 |
| 215 | 0.060092  | -0.001693 | -0.006571 | 0.089522  | 0.091481  | -0.006066 | 0.000037  | -0.000015 | 0.000011  | 0.000028  | -0.000040 | 0.000022  |
| 216 | 0.199229  | -0.005403 | -0.004785 | -0.006742 | 0.089880  | 0.086662  | 0.000249  | 0.000215  | 0.000046  | -0.000012 | 0.000278  | 0.000195  |
| 217 | 5.544900  | -0.007965 | -0.004751 | -0.004734 | -0.010274 | 0.084160  | 0.000299  | 0.000024  | -0.000014 | 0.000089  | 0.000272  | 0.000016  |
| 218 | -0.007965 | 5.304260  | 0.008866  | 0.001956  | 0.001435  | 0.003139  | 0.000109  | -0.000001 | 0.000016  | 0.000009  | 0.000000  | 0.000078  |
| 219 | -0.004751 | 0.008866  | 5.284120  | 0.008953  | 0.002764  | 0.001537  | 0.000050  | 0.000101  | 0.000059  | 0.000001  | 0.000114  | 0.000056  |
| 220 | -0.004734 | 0.001956  | 0.008953  | 5.289810  | 0.008992  | 0.002374  | 0.000023  | 0.000081  | 0.000032  | 0.000019  | 0.000083  | 0.000015  |
| 221 | -0.010274 | 0.001435  | 0.002764  | 0.008992  | 5.278970  | 0.009641  | 0.000005  | 0.000050  | 0.000014  | -0.000012 | 0.000081  | -0.000001 |
| 222 | 0.084160  | 0.003139  | 0.001537  | 0.002374  | 0.009641  | 5.285570  | 0.000016  | -0.000049 | -0.000007 | -0.000014 | -0.000036 | -0.000063 |
| 223 | 0.000299  | 0.000109  | 0.000050  | 0.000023  | 0.000005  | 0.000016  | 5.545570  | 0.197762  | 0.058198  | 1.191370  | 0.090982  | 0.243424  |
| 224 | 0.000024  | -0.000001 | 0.000101  | 0.000081  | 0.000050  | -0.000049 | 0.197762  | 5.759600  | 0.207925  | 0.085591  | 1.214690  | 0.090689  |
| 225 | -0.000014 | 0.000016  | 0.000059  | 0.000032  | 0.000014  | -0.000007 | 0.058198  | 0.207925  | 5.774490  | 0.216873  | 0.081959  | 1.194110  |
| 226 | 0.000089  | 0.000009  | 0.000001  | 0.000019  | -0.000012 | -0.000014 | 1.191370  | 0.085591  | 0.216873  | 5.771610  | 0.207664  | 0.058605  |
| 227 | 0.000272  | 0.000000  | 0.000114  | 0.000083  | 0.000081  | -0.000036 | 0.090982  | 1.214690  | 0.081959  | 0.207664  | 5.759040  | 0.202500  |
| 228 | 0.000016  | 0.000078  | 0.000056  | 0.000015  | -0.000001 | -0.000063 | 0.243424  | 0.090689  | 1.194110  | 0.058605  | 0.202500  | 5.534020  |
| 229 | 0.000076  | 0.000024  | -0.000040 | -0.000017 | -0.000024 | 0.000022  | 0.083894  | 0.085429  | -0.006201 | -0.001188 | -0.005054 | -0.007700 |
| 230 | 0.000060  | -0.000028 | 0.000046  | 0.000062  | 0.000070  | 0.000006  | -0.010208 | 0.089616  | 0.091500  | -0.007360 | -0.005384 | -0.004347 |
| 231 | 0.000029  | -0.000005 | 0.000059  | 0.000051  | 0.000044  | -0.000014 | -0.004435 | -0.006288 | 0.089580  | 0.089430  | -0.007103 | -0.005103 |
| 232 | 0.000031  | -0.000007 | 0.000070  | 0.000050  | 0.000020  | -0.000043 | -0.004725 | -0.004897 | -0.006680 | 0.090590  | 0.089596  | -0.010589 |
| 233 | -0.000035 | 0.000028  | -0.000005 | -0.000025 | -0.000050 | -0.000014 | -0.008172 | -0.005226 | -0.001220 | -0.006331 | 0.083657  | 0.081127  |
| 234 | 0.000501  | -0.000056 | 0.000118  | 0.000152  | 0.000121  | -0.000135 | 0.000676  | 0.000304  | -0.000324 | 0.000127  | 0.000572  | 0.000512  |
| 235 | -0.000148 | 0.000037  | 0.000230  | 0.000124  | 0.000222  | 0.000088  | 0.000007  | 0.000600  | 0.000113  | 0.000194  | 0.000148  | 0.000216  |
| 236 | -0.000202 | 0.000036  | -0.000110 | -0.000109 | -0.000119 | 0.000050  | -0.000236 | -0.000359 | 0.000081  | -0.000098 | -0.000285 | -0.000357 |
| 237 | -0.000179 | 0.000018  | -0.000047 | -0.000060 | -0.000060 | 0.000036  | -0.000242 | -0.000113 | 0.000181  | -0.000151 | -0.000213 | -0.000145 |
| 238 | 0.000036  | -0.000015 | -0.000009 | -0.000003 | -0.000001 | -0.000011 | 0.000006  | 0.000011  | -0.000053 | 0.000035  | -0.000025 | 0.000060  |
| 239 | -0.000009 | -0.000019 | -0.000043 | -0.000019 | -0.000036 | -0.000016 | -0.000029 | -0.000071 | -0.000040 | -0.000005 | -0.000059 | 0.000019  |
| 240 | -0.000007 | -0.000006 | 0.000054  | 0.000048  | 0.000055  | -0.000010 | 0.000068  | 0.000142  | 0.000005  | 0.000025  | 0.000102  | 0.000048  |
| 241 | -0.000018 | -0.000006 | 0.000054  | 0.000053  | 0.000057  | -0.000018 | 0.000048  | 0.000171  | 0.000021  | 0.000031  | 0.000112  | 0.000048  |
| 242 | 0.000009  | 0.000005  | -0.000014 | -0.000016 | -0.000003 | 0.000022  | -0.000093 | -0.000042 | 0.000065  | -0.000040 | -0.000098 | -0.000072 |
| 243 | 0.000045  | 0.000013  | 0.000015  | -0.000003 | 0.000005  | 0.000016  | -0.000076 | 0.000042  | 0.000038  | -0.000054 | -0.000042 | -0.000021 |
| 244 | 0.000047  | -0.000010 | -0.000096 | -0.000057 | -0.000094 | -0.000016 | -0.000079 | -0.000235 | -0.000022 | -0.000025 | -0.000061 | -0.000146 |
| 245 | -0.000075 | 0.000003  | -0.000151 | -0.000109 | -0.000148 | -0.000005 | -0.000053 | -0.000451 | -0.000066 | -0.000036 | -0.000150 | -0.000162 |
| 246 | 0.000711  | -0.000083 | 0.000142  | 0.000126  | 0.000160  | 0.000039  | 0.000481  | 0.000346  | 0.000281  | -0.000221 | -0.000176 | 0.000596  |

|     |           |           |           |           |           |           |           |           |           |           |           |           |
|-----|-----------|-----------|-----------|-----------|-----------|-----------|-----------|-----------|-----------|-----------|-----------|-----------|
| 247 | 0.000043  | -0.000002 | 0.000187  | 0.000139  | 0.000254  | 0.000016  | -0.000037 | 0.000545  | -0.000158 | 0.000161  | 0.000858  | -0.000053 |
| 248 | -0.000337 | 0.000047  | -0.000133 | -0.000118 | -0.000149 | 0.000005  | -0.000196 | -0.000298 | -0.000114 | 0.000064  | -0.000093 | -0.000293 |
| 249 | -0.000258 | 0.000030  | -0.000065 | -0.000054 | -0.000066 | 0.000019  | -0.000096 | -0.000219 | -0.000151 | 0.000113  | 0.000054  | -0.000289 |
| 250 | 0.000091  | 0.000017  | 0.000016  | 0.000004  | -0.000014 | -0.000025 | 0.000089  | -0.000047 | 0.000007  | 0.000002  | -0.000053 | 0.000040  |
| 251 | 0.000003  | -0.000001 | -0.000018 | -0.000015 | -0.000056 | -0.000045 | 0.000056  | -0.000103 | 0.000005  | 0.000005  | -0.000106 | 0.000023  |
| 252 | 0.000013  | -0.000028 | 0.000058  | 0.000045  | 0.000059  | -0.000021 | -0.000019 | 0.000155  | 0.000048  | -0.000040 | 0.000048  | 0.000099  |
| 253 | 0.000024  | -0.000036 | 0.000063  | 0.000058  | 0.000070  | -0.000030 | 0.000000  | 0.000154  | 0.000052  | -0.000030 | 0.000060  | 0.000100  |
| 254 | -0.000092 | -0.000008 | -0.000025 | -0.000005 | -0.000007 | 0.000028  | -0.000038 | -0.000021 | -0.000040 | 0.000055  | 0.000075  | -0.000098 |
| 255 | -0.000050 | -0.000018 | -0.000014 | 0.000002  | 0.000025  | 0.000030  | 0.000000  | 0.000024  | -0.000052 | 0.000042  | 0.000138  | -0.000065 |
| 256 | -0.000093 | 0.000025  | -0.000077 | -0.000056 | -0.000097 | -0.000032 | -0.000098 | -0.000200 | 0.000089  | -0.000076 | -0.000344 | 0.000017  |
| 257 | -0.000055 | 0.000059  | -0.000135 | -0.000124 | -0.000179 | 0.000014  | -0.000140 | -0.000335 | 0.000035  | -0.000075 | -0.000458 | -0.000077 |
| 258 | 0.549122  | -0.048590 | -0.002854 | -0.005348 | 0.009147  | -0.083312 | 0.000457  | 0.000181  | -0.000055 | 0.000003  | 0.000557  | 0.000634  |
| 259 | 0.239457  | -0.078096 | 0.008008  | -0.004986 | -0.004099 | -0.051044 | 0.000263  | 0.000367  | 0.000388  | -0.000127 | 0.000471  | -0.000095 |
| 260 | 0.139178  | 0.120743  | -0.054909 | -0.000986 | -0.005730 | 0.014196  | -0.000225 | -0.000205 | -0.000096 | 0.000044  | -0.000382 | -0.000227 |
| 261 | 0.133496  | 0.108455  | -0.065235 | 0.010470  | -0.005692 | 0.003228  | -0.000208 | -0.000054 | -0.000059 | 0.000054  | -0.000222 | -0.000187 |
| 262 | -0.548888 | -0.061853 | 0.117674  | -0.056796 | 0.000345  | -0.004623 | 0.000037  | -0.000010 | 0.000018  | -0.000036 | 0.000006  | 0.000075  |
| 263 | -0.511913 | -0.052429 | 0.119068  | -0.066437 | 0.012221  | -0.004852 | -0.000019 | -0.000057 | -0.000006 | 0.000002  | -0.000083 | 0.000021  |
| 264 | -0.517262 | 0.007743  | -0.066138 | 0.118924  | -0.057410 | -0.002750 | 0.000046  | 0.000124  | 0.000063  | -0.000001 | 0.000157  | 0.000037  |
| 265 | -0.553525 | -0.002671 | -0.056552 | 0.118971  | -0.067232 | 0.008460  | 0.000047  | 0.000097  | 0.000039  | -0.000012 | 0.000143  | 0.000051  |
| 266 | 0.145484  | -0.004746 | 0.011689  | -0.066244 | 0.119064  | -0.055014 | -0.000096 | -0.000052 | -0.000021 | 0.000009  | -0.000070 | -0.000094 |
| 267 | 0.146475  | -0.004476 | 0.000000  | -0.056642 | 0.119388  | -0.064495 | -0.000072 | 0.000013  | -0.000011 | -0.000015 | -0.000005 | -0.000059 |
| 268 | 0.268165  | 0.003045  | -0.005358 | 0.010262  | -0.065121 | 0.116065  | -0.000088 | -0.000105 | -0.000091 | 0.000029  | -0.000235 | -0.000017 |
| 269 | 0.510105  | 0.012861  | -0.005390 | -0.001181 | -0.054877 | 0.124134  | -0.000141 | -0.000300 | -0.000168 | 0.000049  | -0.000338 | -0.000138 |
| 270 | 0.000794  | -0.000029 | 0.000123  | 0.000131  | 0.000202  | -0.000024 | 0.235468  | 0.144996  | -0.567972 | -0.581973 | 0.139643  | 0.547070  |
| 271 | -0.000271 | -0.000017 | 0.000236  | 0.000123  | 0.000124  | -0.000074 | 0.557608  | 0.131968  | -0.584250 | -0.567681 | 0.139576  | 0.243540  |
| 272 | -0.000291 | 0.000051  | -0.000123 | -0.000115 | -0.000160 | 0.000000  | 0.514551  | 0.301981  | 0.158578  | -0.532461 | -0.572944 | 0.138847  |
| 273 | -0.000243 | 0.000031  | -0.000060 | -0.000052 | -0.000077 | 0.000008  | 0.265244  | 0.529671  | 0.160652  | -0.566672 | -0.537110 | 0.133169  |
| 274 | 0.000114  | -0.000002 | -0.000018 | -0.000002 | 0.000013  | 0.000052  | 0.144675  | 0.519188  | 0.297201  | 0.150269  | -0.537307 | -0.550285 |
| 275 | 0.000055  | -0.000002 | -0.000041 | -0.000009 | -0.000010 | 0.000029  | 0.143290  | 0.289500  | 0.525396  | 0.153775  | -0.572561 | -0.513510 |
| 276 | 0.000032  | -0.000048 | 0.000076  | 0.000060  | 0.000067  | -0.000029 | -0.552802 | 0.149248  | 0.516312  | 0.288244  | 0.150725  | -0.512749 |
| 277 | 0.000047  | -0.000048 | 0.000061  | 0.000049  | 0.000062  | -0.000025 | -0.516442 | 0.148306  | 0.288410  | 0.516584  | 0.151866  | -0.549314 |
| 278 | -0.000106 | 0.000007  | -0.000011 | -0.000013 | -0.000027 | -0.000014 | -0.510522 | -0.574301 | 0.154841  | 0.527537  | 0.283540  | 0.144856  |
| 279 | -0.000059 | 0.000017  | 0.000020  | 0.000000  | -0.000004 | -0.000020 | -0.547319 | -0.538163 | 0.152196  | 0.299155  | 0.514048  | 0.145830  |
| 280 | 0.000038  | 0.000016  | -0.000096 | -0.000053 | -0.000061 | 0.000044  | 0.130182  | -0.533169 | -0.567646 | 0.157741  | 0.534252  | 0.263080  |
| 281 | -0.000109 | 0.000024  | -0.000166 | -0.000118 | -0.000130 | 0.000054  | 0.136123  | -0.569062 | -0.533602 | 0.155462  | 0.306126  | 0.509323  |
| 282 | 0.000034  | -0.000013 | 0.000080  | 0.000020  | 0.000026  | -0.000049 | 0.000419  | -0.000058 | 0.000130  | -0.000141 | -0.000205 | 0.000258  |
| 283 | 0.000035  | -0.000004 | 0.000031  | 0.000013  | 0.000022  | -0.000008 | 0.000000  | -0.000004 | 0.000052  | -0.000026 | -0.000178 | -0.000019 |
| 284 | 0.000003  | 0.000001  | -0.000005 | 0.000001  | 0.000000  | 0.000008  | 0.000032  | 0.000083  | 0.000004  | 0.000019  | 0.000095  | 0.000078  |
| 285 | -0.000004 | 0.000001  | -0.000003 | 0.000000  | 0.000001  | -0.000004 | 0.000024  | 0.000047  | 0.000008  | 0.000021  | 0.000063  | 0.000039  |
| 286 | 0.000011  | 0.000003  | -0.000023 | -0.000005 | -0.000008 | 0.000006  | 0.000008  | 0.000029  | 0.000000  | 0.000019  | 0.000072  | -0.000003 |
| 287 | 0.000052  | -0.000004 | -0.000015 | 0.000002  | 0.000007  | 0.000012  | -0.000021 | 0.000127  | 0.000015  | 0.000039  | 0.000099  | 0.000078  |
| 288 | 0.000194  | 0.000020  | -0.000048 | -0.000012 | -0.000051 | 0.000051  | -0.000223 | -0.000045 | -0.000113 | 0.000021  | -0.000103 | 0.000067  |
| 289 | -0.000026 | 0.000029  | -0.000002 | 0.000008  | -0.000044 | -0.000023 | -0.000022 | 0.000003  | -0.000010 | -0.000023 | 0.000008  | 0.000030  |
| 290 | 0.000042  | -0.000022 | 0.000014  | 0.000016  | 0.000045  | 0.000016  | 0.000040  | 0.000050  | 0.000018  | 0.000000  | 0.000029  | 0.000029  |
| 291 | 0.000040  | 0.000000  | 0.000013  | 0.000016  | 0.000029  | 0.000008  | 0.000025  | -0.000010 | -0.000006 | 0.000023  | 0.000031  | -0.000009 |
| 292 | 0.000014  | 0.000004  | 0.000015  | 0.000015  | 0.000015  | -0.000013 | 0.000003  | 0.000002  | 0.000014  | 0.000015  | 0.000009  | -0.000030 |
| 293 | 0.000057  | 0.000014  | 0.000039  | 0.000021  | 0.000017  | -0.000019 | 0.000071  | 0.000075  | 0.000018  | 0.000012  | 0.000035  | 0.000013  |
| 294 | 0.004915  | 0.000915  | 0.000380  | -0.000020 | 0.000110  | -0.001481 | -0.000125 | 0.000202  | -0.000019 | 0.000014  | 0.000108  | 0.000033  |
| 295 | 0.006637  | 0.000385  | -0.000010 | -0.000013 | -0.000099 | 0.000675  | -0.000127 | -0.000061 | -0.000022 | 0.000002  | -0.000033 | -0.000034 |
| 296 | -0.002115 | 0.000119  | 0.000005  | 0.000430  | 0.000197  | 0.000498  | 0.000029  | 0.000048  | -0.000003 | 0.000020  | 0.000019  | 0.000011  |

|     |           |           |           |           |           |           |           |           |           |           |           |           |
|-----|-----------|-----------|-----------|-----------|-----------|-----------|-----------|-----------|-----------|-----------|-----------|-----------|
| 297 | -0.002449 | -0.000263 | 0.000055  | 0.000148  | -0.000306 | 0.000432  | 0.000061  | 0.000031  | 0.000006  | 0.000035  | 0.000073  | 0.000020  |
| 298 | -0.004215 | -0.000300 | -0.000723 | -0.000161 | -0.000215 | -0.000041 | 0.000121  | 0.000052  | 0.000051  | 0.000016  | 0.000071  | 0.000070  |
| 299 | -0.000512 | 0.000714  | -0.000325 | 0.000023  | -0.000130 | 0.000294  | 0.000124  | 0.000018  | -0.000010 | 0.000046  | 0.000067  | 0.000088  |
| 300 | 0.000036  | -0.000108 | -0.000031 | -0.000030 | -0.000004 | -0.000085 | -0.002820 | 0.002057  | -0.003022 | -0.002071 | 0.001129  | 0.003879  |
| 301 | -0.000059 | -0.000031 | -0.000058 | -0.000023 | -0.000003 | 0.000012  | -0.000309 | -0.006232 | -0.005605 | -0.000387 | 0.006586  | 0.006794  |
| 302 | 0.000028  | 0.000024  | 0.000030  | 0.000012  | 0.000004  | 0.000006  | 0.005637  | 0.003717  | -0.001231 | -0.001110 | -0.001073 | -0.001464 |
| 303 | 0.000020  | 0.000020  | 0.000033  | 0.000016  | 0.000011  | 0.000001  | 0.002094  | 0.000440  | 0.000500  | 0.000774  | -0.001200 | -0.001173 |
| 304 | 0.000068  | 0.000025  | 0.000035  | 0.000023  | 0.000021  | 0.000015  | 0.000299  | -0.000042 | 0.001383  | 0.001032  | -0.002124 | -0.004125 |
| 305 | 0.000071  | 0.000042  | 0.000011  | 0.000004  | 0.000016  | 0.000053  | 0.005848  | 0.002616  | -0.002682 | -0.001494 | -0.001431 | -0.001416 |
| 306 | -0.000031 | -0.000010 | -0.000029 | -0.000018 | 0.000006  | 0.000008  | 0.000010  | 0.000240  | 0.000300  | -0.000142 | -0.000233 | 0.000360  |
| 307 | 0.000007  | -0.000010 | 0.000046  | 0.000015  | 0.000018  | -0.000038 | 0.000163  | -0.000011 | 0.000071  | -0.000076 | -0.000092 | 0.000102  |
| 308 | 0.000016  | 0.000004  | 0.000023  | 0.000008  | 0.000013  | 0.000014  | 0.000063  | 0.000027  | 0.000016  | 0.000011  | -0.000008 | 0.000064  |
| 309 | -0.000012 | 0.000000  | -0.000023 | -0.000010 | -0.000017 | -0.000010 | 0.000007  | -0.000034 | -0.000005 | -0.000013 | -0.000002 | -0.000013 |
| 310 | -0.000027 | -0.000004 | 0.000006  | 0.000000  | 0.000002  | -0.000003 | -0.000011 | -0.000004 | -0.000018 | -0.000002 | 0.000025  | -0.000029 |
| 311 | 0.000006  | 0.000005  | 0.000012  | 0.000006  | 0.000004  | 0.000011  | -0.000030 | 0.000010  | -0.000005 | 0.000011  | 0.000019  | 0.000032  |
| 312 | 0.000008  | 0.000004  | -0.000062 | -0.000020 | -0.000020 | 0.000027  | -0.000190 | 0.000013  | -0.000057 | 0.000068  | 0.000055  | -0.000155 |
| 313 | 0.000227  | 0.000090  | 0.000036  | 0.000014  | -0.000123 | -0.000078 | -0.000240 | 0.000305  | 0.000187  | -0.000268 | -0.000299 | 0.000247  |
| 314 | 0.000088  | 0.000034  | -0.000018 | -0.000015 | -0.000033 | 0.000049  | -0.000064 | -0.000142 | -0.000076 | 0.000016  | -0.000009 | -0.000022 |
| 315 | 0.000066  | 0.000003  | 0.000008  | 0.000012  | 0.000014  | 0.000011  | -0.000013 | 0.000076  | 0.000004  | 0.000000  | 0.000005  | 0.000054  |
| 316 | -0.000056 | -0.000025 | -0.000016 | 0.000004  | 0.000000  | -0.000025 | -0.000023 | 0.000005  | 0.000018  | -0.000003 | -0.000018 | -0.000004 |
| 317 | 0.000018  | 0.000000  | 0.000000  | -0.000017 | 0.000009  | 0.000033  | 0.000000  | -0.000062 | -0.000038 | 0.000010  | -0.000006 | -0.000034 |
| 318 | 0.000005  | 0.000007  | 0.000002  | -0.000003 | 0.000000  | 0.000013  | 0.000050  | 0.000021  | 0.000035  | -0.000016 | 0.000031  | 0.000032  |
| 319 | -0.000124 | -0.000019 | 0.000024  | 0.000019  | 0.000010  | -0.000080 | 0.000047  | 0.000103  | 0.000056  | -0.000005 | 0.000000  | -0.000028 |
| 320 | 0.043346  | -0.004366 | -0.000884 | -0.000429 | -0.000672 | -0.006281 | -0.000200 | -0.000249 | 0.000049  | 0.000042  | 0.000276  | 0.000043  |
| 321 | 0.002372  | 0.000740  | -0.000337 | -0.000227 | 0.000184  | -0.000454 | 0.000086  | 0.000032  | -0.000018 | 0.000069  | 0.000154  | 0.000003  |
| 322 | 0.000979  | -0.000486 | 0.000201  | -0.000069 | 0.000177  | 0.000155  | -0.000078 | 0.000048  | -0.000035 | -0.000001 | -0.000009 | -0.000008 |
| 323 | 0.000962  | -0.000031 | 0.000379  | 0.000231  | -0.000244 | -0.000380 | -0.000034 | 0.000018  | 0.000041  | -0.000029 | -0.000043 | 0.000007  |
| 324 | -0.001139 | -0.000275 | -0.000189 | 0.000008  | 0.000234  | 0.000154  | 0.000046  | -0.000009 | 0.000002  | 0.000003  | 0.000029  | -0.000012 |
| 325 | -0.001802 | 0.000328  | -0.000016 | 0.000065  | 0.000535  | -0.000417 | 0.000004  | -0.000042 | -0.000065 | 0.000028  | -0.000010 | -0.000046 |
| 326 | 0.000633  | -0.000259 | -0.000125 | 0.000039  | -0.000845 | 0.000895  | -0.000024 | -0.000048 | 0.000075  | -0.000071 | -0.000121 | 0.000054  |
| 327 | -0.000173 | 0.000043  | -0.000073 | -0.000007 | 0.000056  | 0.000121  | 0.041313  | -0.013531 | 0.000629  | 0.000522  | -0.011598 | 0.043037  |
| 328 | 0.000050  | -0.000008 | -0.000011 | -0.000021 | 0.000005  | -0.000026 | -0.001395 | -0.002064 | 0.001899  | -0.003014 | 0.001936  | 0.003590  |
| 329 | -0.000009 | -0.000030 | -0.000001 | 0.000002  | 0.000008  | -0.000002 | 0.001776  | 0.002686  | -0.005415 | -0.001333 | 0.001627  | 0.002470  |
| 330 | -0.000012 | -0.000010 | 0.000004  | 0.000007  | -0.000014 | -0.000021 | -0.001154 | -0.001357 | 0.001635  | -0.002098 | 0.000449  | 0.001035  |
| 331 | -0.000001 | 0.000027  | 0.000018  | 0.000002  | 0.000006  | -0.000006 | -0.002383 | 0.002364  | 0.001713  | 0.002601  | -0.003296 | -0.001014 |
| 332 | 0.000005  | -0.000011 | -0.000018 | -0.000014 | -0.000009 | 0.000012  | -0.001720 | 0.000014  | 0.003598  | -0.002326 | 0.004522  | 0.000606  |
| 333 | -0.000037 | 0.000033  | 0.000008  | 0.000024  | 0.000003  | 0.000042  | 0.000012  | 0.000165  | -0.000492 | 0.001956  | -0.005577 | -0.001835 |

|    | 229       | 230       | 231       | 232       | 233       | 234       | 235       | 236       | 237       | 238       | 239       | 240       |
|----|-----------|-----------|-----------|-----------|-----------|-----------|-----------|-----------|-----------|-----------|-----------|-----------|
| 1  | 0.000075  | -0.000288 | -0.000175 | -0.000342 | 0.000055  | -0.001565 | -0.001532 | 0.001241  | 0.000792  | -0.000138 | 0.000151  | -0.000505 |
| 2  | -0.000937 | 0.000302  | 0.000622  | 0.001415  | 0.000119  | 0.008105  | 0.002246  | -0.003303 | -0.001473 | -0.000991 | -0.001339 | 0.001625  |
| 3  | 0.001541  | 0.000216  | 0.000201  | 0.000596  | -0.000005 | 0.021940  | -0.022927 | -0.002685 | -0.002020 | 0.001404  | 0.000609  | 0.000181  |
| 4  | 0.000037  | 0.000315  | 0.000151  | 0.000353  | 0.000039  | -0.018085 | 0.030599  | -0.000313 | -0.003766 | 0.000016  | -0.000605 | 0.001877  |
| 5  | 0.000475  | 0.000388  | 0.000208  | 0.000331  | -0.000130 | 0.003485  | 0.003469  | -0.002686 | -0.002725 | 0.000491  | 0.000090  | 0.001096  |
| 6  | 0.000708  | 0.000769  | -0.000018 | 0.000262  | 0.002406  | 0.001996  | 0.004376  | -0.002067 | -0.001640 | -0.000241 | -0.000502 | 0.001279  |
| 7  | 0.000940  | 0.000204  | -0.000081 | 0.000005  | -0.000068 | -0.000640 | 0.002438  | -0.000531 | -0.001150 | 0.000580  | 0.000315  | 0.000016  |
| 8  | 0.000767  | 0.001270  | 0.000565  | 0.001417  | -0.003042 | -0.010936 | -0.005597 | 0.005126  | 0.003821  | 0.000122  | 0.000788  | -0.000699 |
| 9  | 0.000068  | -0.000610 | -0.000170 | -0.000413 | 0.000902  | 0.048357  | -0.015887 | -0.014089 | -0.011008 | 0.002085  | -0.000142 | 0.002191  |
| 10 | 0.000378  | 0.000422  | 0.000045  | 0.000372  | 0.000519  | -0.012221 | 0.066971  | -0.007782 | -0.012245 | -0.002610 | -0.003659 | 0.004300  |

|    |           |           |           |           |           |           |           |           |           |           |           |           |
|----|-----------|-----------|-----------|-----------|-----------|-----------|-----------|-----------|-----------|-----------|-----------|-----------|
| 11 | -0.000345 | -0.000035 | 0.000051  | -0.000071 | -0.000366 | -0.006218 | -0.014542 | 0.003908  | 0.003809  | 0.001159  | 0.001416  | -0.000803 |
| 12 | 0.000031  | 0.000121  | 0.000103  | -0.000009 | -0.000261 | 0.005750  | 0.002413  | -0.003016 | -0.002784 | 0.000768  | 0.000159  | 0.000496  |
| 13 | 0.000498  | 0.000440  | 0.000136  | 0.000382  | 0.000168  | -0.001940 | 0.001365  | 0.000551  | 0.000468  | -0.000302 | -0.000277 | 0.000199  |
| 14 | 0.000314  | -0.000394 | -0.000171 | -0.000602 | -0.000009 | 0.000383  | -0.001631 | -0.000487 | 0.000060  | 0.000292  | 0.000356  | 0.000124  |
| 15 | -0.000616 | 0.001750  | 0.000335  | 0.001392  | 0.001995  | 0.002889  | 0.005027  | -0.001813 | -0.001754 | -0.000230 | -0.000713 | 0.000669  |
| 16 | -0.000741 | -0.000672 | -0.000745 | -0.000764 | -0.000353 | -0.012726 | 0.002051  | 0.003924  | 0.002874  | 0.000171  | 0.000700  | -0.001591 |
| 17 | 0.000451  | 0.000808  | 0.000198  | 0.001107  | 0.002174  | 0.008592  | 0.006324  | -0.004484 | -0.003990 | 0.000431  | -0.000728 | 0.001301  |
| 18 | 0.000211  | 0.000129  | 0.000330  | -0.000226 | -0.000468 | 0.015593  | -0.002591 | -0.003322 | -0.001934 | -0.000744 | -0.000729 | 0.000071  |
| 19 | -0.000041 | -0.000094 | -0.000111 | -0.000060 | 0.000236  | -0.009320 | 0.033989  | -0.000182 | -0.008179 | -0.001764 | -0.000938 | 0.000612  |
| 20 | -0.000183 | 0.000224  | 0.000249  | 0.000170  | -0.000352 | 0.007381  | 0.006964  | -0.004011 | -0.004744 | 0.000861  | -0.000504 | 0.001075  |
| 21 | 0.000107  | 0.000016  | -0.000119 | -0.000018 | 0.000344  | 0.004541  | -0.024304 | 0.005007  | 0.007148  | -0.000929 | -0.000571 | -0.002227 |
| 22 | 0.000336  | 0.000011  | -0.000105 | -0.000032 | 0.000159  | 0.000746  | -0.000166 | 0.000149  | -0.000375 | -0.000078 | -0.000081 | -0.000161 |
| 23 | -0.000307 | 0.000300  | 0.000284  | 0.000208  | -0.000177 | -0.000132 | -0.000042 | -0.000200 | 0.000509  | 0.000023  | -0.000093 | 0.000118  |
| 24 | 0.000202  | -0.000034 | -0.000077 | -0.000028 | 0.000046  | 0.000524  | 0.000858  | 0.000009  | -0.000367 | -0.000057 | -0.000142 | -0.000158 |
| 25 | -0.001368 | -0.000162 | 0.000296  | -0.000005 | 0.000066  | 0.000826  | 0.000764  | -0.000238 | -0.000380 | 0.000010  | -0.000075 | -0.000099 |
| 26 | 0.002097  | 0.001176  | 0.000219  | 0.000888  | 0.000667  | 0.000398  | -0.000443 | -0.000278 | 0.000097  | 0.000016  | -0.000055 | 0.000118  |
| 27 | 0.000959  | -0.000763 | -0.000790 | -0.000582 | -0.000629 | 0.000189  | 0.000643  | -0.000104 | -0.000086 | 0.000046  | -0.000019 | -0.000080 |
| 28 | 0.000310  | 0.000746  | 0.000244  | 0.000825  | 0.001185  | 0.009643  | -0.016450 | -0.004499 | -0.007498 | 0.005945  | 0.004359  | 0.004795  |
| 29 | -0.000544 | -0.000656 | -0.000088 | -0.000710 | -0.000973 | -0.021995 | 0.030401  | -0.000670 | -0.009124 | 0.000624  | 0.000971  | 0.006245  |
| 30 | -0.000109 | 0.000025  | 0.000019  | -0.000025 | -0.000156 | 0.005467  | 0.007548  | -0.002278 | -0.002660 | -0.000063 | -0.001043 | 0.000345  |
| 31 | -0.000072 | 0.000120  | 0.000045  | -0.000009 | 0.000101  | -0.007037 | -0.008468 | 0.004297  | 0.004660  | -0.000405 | 0.000402  | -0.001184 |
| 32 | -0.001101 | -0.000624 | -0.000021 | -0.000645 | -0.000437 | -0.001529 | 0.001006  | 0.000592  | 0.000840  | 0.000028  | -0.000076 | -0.000291 |
| 33 | 0.001061  | 0.000953  | 0.000224  | 0.000807  | 0.000589  | 0.000669  | -0.001905 | 0.000302  | 0.000289  | -0.000185 | -0.000126 | -0.000363 |
| 34 | 0.004307  | -0.000284 | -0.000485 | -0.000121 | 0.004294  | -0.006941 | -0.007238 | 0.004063  | 0.003608  | -0.000009 | 0.000734  | -0.001213 |
| 35 | 0.003515  | -0.000275 | -0.000397 | -0.000360 | 0.002224  | 0.009986  | 0.003701  | -0.004594 | -0.003783 | 0.000591  | -0.000396 | 0.000400  |
| 36 | 0.000236  | -0.000052 | -0.000146 | -0.000129 | 0.002921  | 0.000304  | 0.000739  | -0.000298 | -0.000201 | -0.000039 | -0.000119 | 0.000174  |
| 37 | 0.000007  | 0.000069  | 0.000050  | 0.000120  | 0.000007  | -0.004865 | 0.003226  | 0.001323  | 0.001371  | -0.000003 | 0.000088  | -0.001549 |
| 38 | 0.000002  | 0.000016  | 0.000026  | 0.000027  | -0.000014 | 0.002807  | -0.006187 | 0.002438  | 0.000408  | 0.000199  | 0.000013  | -0.001896 |
| 39 | -0.000017 | 0.000045  | 0.000027  | 0.000032  | -0.000010 | 0.000588  | 0.000490  | -0.000431 | -0.000262 | 0.000074  | -0.000050 | 0.000154  |
| 40 | -0.000014 | 0.000057  | 0.000041  | 0.000041  | -0.000006 | 0.000065  | 0.000209  | -0.000090 | -0.000036 | 0.000003  | -0.000021 | 0.000027  |
| 41 | -0.000006 | 0.000044  | 0.000044  | 0.000031  | -0.000020 | 0.000118  | 0.000078  | -0.000079 | -0.000052 | 0.000002  | -0.000013 | 0.000033  |
| 42 | 0.000004  | 0.000129  | 0.000064  | 0.000085  | 0.000008  | 0.000124  | 0.000104  | -0.000088 | -0.000042 | 0.000000  | -0.000021 | 0.000045  |
| 43 | 0.001872  | -0.000095 | -0.000145 | -0.000083 | 0.000270  | 0.000251  | 0.000037  | -0.000148 | -0.000087 | 0.000010  | -0.000009 | 0.000054  |
| 44 | 0.000012  | 0.000015  | 0.000018  | 0.000040  | 0.000014  | 0.277095  | 0.266644  | -0.130332 | -0.101681 | -0.016727 | -0.025720 | -0.000122 |
| 45 | 0.000052  | 0.000105  | 0.000036  | 0.000059  | 0.000014  | 0.000394  | 0.000094  | -0.000071 | -0.000081 | -0.000041 | -0.000081 | 0.000034  |
| 46 | 0.000067  | 0.000046  | 0.000030  | 0.000051  | -0.000044 | 0.000370  | 0.000710  | -0.000272 | -0.000209 | -0.000025 | -0.000106 | 0.000072  |
| 47 | -0.003162 | 0.004024  | 0.000588  | 0.003858  | -0.002663 | 0.000222  | 0.000377  | -0.000117 | -0.000026 | -0.000084 | -0.000109 | 0.000053  |
| 48 | 0.000214  | -0.000161 | -0.000142 | -0.000096 | 0.000176  | -0.001317 | 0.001071  | 0.000453  | 0.000142  | 0.000032  | 0.000003  | -0.000089 |
| 49 | -0.000077 | 0.000125  | -0.000049 | -0.000014 | -0.000223 | 0.000531  | -0.000328 | -0.000089 | -0.000405 | 0.000023  | 0.000079  | -0.000050 |
| 50 | -0.000399 | 0.000313  | 0.000089  | 0.000049  | -0.000338 | 0.001874  | -0.002785 | -0.000578 | 0.000973  | -0.000373 | -0.000353 | 0.000263  |
| 51 | 0.000384  | 0.000484  | 0.000052  | 0.000081  | -0.000325 | 0.001538  | 0.002801  | -0.001815 | -0.001586 | 0.000687  | 0.000075  | 0.000530  |
| 52 | 0.000407  | -0.000578 | -0.000386 | -0.000253 | 0.000332  | -0.002104 | -0.001278 | 0.001247  | 0.000831  | -0.000096 | 0.000317  | -0.000563 |
| 53 | -0.000021 | 0.000048  | 0.000016  | 0.000001  | -0.000045 | 0.000146  | 0.000032  | -0.000106 | -0.000049 | 0.000021  | 0.000000  | 0.000028  |
| 54 | -0.000011 | 0.000060  | 0.000000  | 0.000000  | -0.000042 | 0.000123  | 0.000075  | -0.000115 | -0.000060 | 0.000038  | -0.000002 | 0.000036  |
| 55 | 0.000065  | -0.000278 | -0.000282 | -0.000167 | 0.000048  | -0.000872 | -0.000235 | 0.000810  | -0.000281 | -0.000023 | 0.000283  | -0.000420 |
| 56 | 0.000281  | 0.000097  | -0.000010 | -0.000006 | -0.000112 | 0.001074  | -0.001184 | -0.000874 | 0.000072  | 0.000215  | 0.000134  | 0.000164  |
| 57 | 0.000073  | 0.000043  | 0.000004  | 0.000004  | -0.000041 | 0.000188  | 0.000226  | -0.000206 | -0.000205 | 0.000100  | 0.000031  | 0.000032  |
| 58 | 0.000105  | 0.000129  | 0.000025  | 0.000024  | -0.000058 | 0.000024  | -0.000030 | 0.000005  | 0.000169  | -0.000104 | -0.000087 | 0.000067  |
| 59 | -0.000046 | 0.000035  | 0.000076  | 0.000062  | 0.000017  | 0.000239  | 0.000471  | -0.000381 | -0.000158 | 0.000106  | -0.000039 | 0.000123  |
| 60 | -0.000025 | -0.000004 | 0.000008  | 0.000022  | 0.000019  | -0.000055 | 0.000097  | -0.000025 | 0.000016  | 0.000024  | 0.000028  | -0.000004 |



|     |           |           |           |           |           |           |           |           |           |           |           |           |
|-----|-----------|-----------|-----------|-----------|-----------|-----------|-----------|-----------|-----------|-----------|-----------|-----------|
| 61  | -0.000933 | -0.000202 | 0.000133  | 0.000219  | -0.000226 | -0.000059 | 0.009214  | -0.001286 | -0.005824 | 0.001595  | 0.000649  | 0.000348  |
| 62  | 0.000520  | 0.000326  | -0.000025 | -0.000034 | -0.000324 | 0.005051  | -0.014841 | 0.000256  | 0.004949  | -0.001214 | -0.000374 | -0.000667 |
| 63  | 0.000849  | 0.000337  | -0.000119 | -0.000048 | -0.000330 | 0.002443  | -0.012207 | -0.000123 | 0.006053  | -0.001292 | -0.000539 | -0.000088 |
| 64  | -0.001151 | -0.000261 | 0.000180  | 0.000167  | -0.000159 | 0.002769  | 0.005725  | -0.000914 | -0.006053 | 0.001400  | 0.000657  | -0.000122 |
| 65  | -0.000775 | -0.000253 | 0.000116  | 0.000086  | 0.000653  | -0.002952 | 0.015009  | 0.000430  | -0.006531 | 0.001301  | 0.000432  | 0.000139  |
| 66  | 0.001530  | -0.000188 | -0.000101 | -0.000092 | 0.000396  | -0.006173 | 0.004266  | 0.000749  | 0.003492  | -0.000786 | -0.000740 | 0.000676  |
| 67  | 0.000917  | 0.000118  | -0.000135 | -0.000255 | -0.000066 | 0.000609  | -0.012224 | 0.001018  | 0.006401  | -0.001610 | -0.000546 | -0.000458 |
| 68  | -0.000938 | 0.000126  | -0.000048 | -0.000040 | 0.000068  | -0.001749 | 0.004939  | -0.000018 | -0.002338 | 0.000580  | 0.000438  | 0.000065  |
| 69  | -0.000632 | -0.000007 | 0.000044  | 0.000010  | -0.000480 | -0.000773 | 0.002308  | -0.000963 | -0.002412 | 0.000671  | 0.000513  | 0.001523  |
| 70  | -0.000450 | -0.000007 | 0.000066  | -0.000079 | -0.000141 | -0.000921 | 0.002537  | 0.000282  | 0.000842  | -0.000693 | -0.000561 | -0.000135 |
| 71  | -0.000275 | 0.000106  | 0.000069  | 0.000037  | -0.000353 | -0.001474 | -0.003187 | 0.001712  | 0.002024  | -0.000192 | -0.000049 | -0.001143 |
| 72  | 0.001423  | -0.000110 | -0.000195 | 0.000004  | 0.001069  | 0.002238  | -0.000576 | -0.000833 | -0.000359 | 0.000165  | 0.000059  | -0.000207 |
| 73  | 0.000850  | -0.000113 | -0.000237 | -0.000881 | -0.002702 | -0.016054 | 0.003689  | 0.005208  | 0.003753  | -0.000191 | 0.000511  | -0.001785 |
| 74  | -0.000398 | 0.000318  | 0.000091  | 0.000567  | -0.000889 | 0.005111  | 0.000876  | -0.002256 | -0.001871 | 0.000412  | 0.000034  | 0.000349  |
| 75  | 0.000017  | 0.000360  | 0.000212  | 0.000261  | -0.000590 | 0.011842  | 0.000500  | -0.004781 | -0.003725 | 0.000340  | -0.000436 | 0.001374  |
| 76  | 0.000235  | -0.000163 | 0.000021  | -0.000520 | 0.000765  | 0.012567  | -0.034155 | 0.003050  | 0.003098  | 0.000736  | 0.001660  | -0.000679 |
| 77  | 0.000156  | -0.000051 | -0.000154 | 0.000005  | 0.000142  | -0.030731 | 0.023335  | 0.003231  | 0.000511  | 0.000510  | 0.001289  | 0.001086  |
| 78  | -0.000058 | 0.000102  | 0.000063  | 0.000074  | -0.000014 | -0.000614 | 0.019691  | -0.003954 | -0.004256 | -0.000664 | -0.000921 | 0.001897  |
| 79  | -0.000018 | 0.000093  | 0.000036  | 0.000074  | 0.000076  | 0.001387  | 0.005304  | -0.001113 | -0.000784 | -0.000832 | -0.000910 | 0.000474  |
| 80  | 0.000179  | -0.000139 | -0.000141 | -0.000141 | 0.000094  | 0.005113  | -0.027740 | 0.004610  | 0.006005  | 0.000563  | 0.000820  | -0.002590 |
| 81  | 0.000263  | -0.000134 | -0.000114 | -0.000118 | 0.000089  | 0.002294  | 0.002286  | -0.001823 | -0.002329 | 0.000443  | 0.000344  | 0.000640  |
| 82  | 0.000071  | 0.000120  | 0.000049  | 0.000077  | 0.000018  | 0.000617  | -0.000156 | -0.000072 | 0.000053  | -0.000039 | -0.000122 | -0.000059 |
| 83  | -0.000041 | 0.000119  | 0.000070  | 0.000092  | -0.000008 | 0.000691  | 0.000163  | -0.000147 | -0.000048 | 0.000019  | -0.000095 | -0.000088 |
| 84  | 0.000362  | -0.000084 | -0.000133 | -0.000026 | -0.000070 | -0.000646 | 0.000359  | -0.000018 | -0.000251 | 0.000102  | 0.000135  | 0.000155  |
| 85  | -0.000325 | -0.000509 | 0.000059  | -0.000326 | -0.000227 | -0.000037 | 0.000112  | -0.000068 | -0.000569 | 0.000043  | 0.000111  | 0.000193  |
| 86  | -0.000307 | 0.000328  | 0.000169  | 0.000367  | 0.000121  | 0.000991  | -0.000023 | -0.000350 | -0.000209 | 0.000085  | -0.000020 | -0.000083 |
| 87  | -0.000073 | 0.000536  | 0.000069  | 0.000427  | -0.000040 | 0.000557  | -0.000021 | -0.000240 | -0.000068 | 0.000098  | 0.000004  | -0.000076 |
| 88  | -0.001648 | -0.000738 | -0.000392 | -0.001086 | 0.001403  | 0.000019  | 0.003140  | -0.000741 | -0.000668 | -0.000307 | -0.000321 | 0.000743  |
| 89  | -0.000080 | -0.000028 | 0.000118  | -0.000070 | -0.000397 | -0.030350 | -0.028572 | 0.017100  | 0.017711  | -0.001496 | 0.001903  | -0.005837 |
| 90  | -0.000127 | -0.000049 | 0.000023  | -0.000080 | -0.000114 | -0.002034 | -0.001801 | 0.000898  | 0.001316  | -0.000089 | 0.000018  | -0.000266 |
| 91  | -0.000451 | 0.000026  | 0.000120  | -0.000030 | 0.000028  | -0.001018 | -0.000978 | 0.000627  | 0.000707  | -0.000075 | 0.000033  | -0.000258 |
| 92  | -0.003669 | -0.003185 | -0.000959 | -0.003062 | -0.004070 | -0.000447 | -0.003015 | 0.000683  | 0.000592  | 0.000187  | 0.000301  | -0.000314 |
| 93  | -0.000065 | -0.000375 | -0.000379 | -0.000661 | 0.000779  | -0.002709 | -0.000620 | 0.001269  | 0.001060  | -0.000216 | 0.000003  | -0.000252 |
| 94  | 0.000465  | 0.000057  | 0.000288  | 0.000094  | 0.000107  | -0.002409 | -0.000247 | 0.000988  | 0.000812  | -0.000195 | -0.000037 | -0.000097 |
| 95  | -0.000007 | -0.000142 | -0.000078 | -0.000052 | 0.000318  | -0.009380 | -0.001495 | 0.003408  | 0.002165  | 0.000509  | 0.000925  | -0.000230 |
| 96  | 0.000006  | -0.000213 | -0.000130 | -0.000215 | 0.000252  | -0.002421 | 0.000953  | 0.001365  | 0.001566  | -0.000833 | -0.000471 | -0.001143 |
| 97  | 0.000021  | -0.000048 | -0.000023 | -0.000020 | 0.000010  | 0.000641  | -0.003793 | 0.001368  | 0.000956  | 0.000410  | 0.000676  | -0.001343 |
| 98  | 0.000037  | -0.000054 | -0.000040 | -0.000054 | 0.000006  | 0.000012  | -0.015928 | 0.002579  | 0.003287  | 0.000264  | 0.000251  | -0.000556 |
| 99  | 0.000011  | -0.000053 | -0.000022 | -0.000041 | -0.000038 | -0.000327 | -0.002710 | 0.000361  | 0.000334  | 0.000472  | 0.000449  | -0.000169 |
| 100 | 0.000007  | -0.000039 | -0.000014 | -0.000032 | -0.000043 | -0.001056 | -0.002698 | 0.000762  | 0.000480  | 0.000359  | 0.000464  | -0.000328 |
| 101 | -0.000030 | -0.000065 | -0.000024 | -0.000050 | -0.000013 | -0.000143 | -0.000025 | -0.000026 | -0.000086 | 0.000049  | 0.000082  | 0.000040  |
| 102 | -0.000039 | -0.000055 | -0.000025 | -0.000027 | -0.000006 | -0.000446 | 0.000140  | 0.000097  | 0.000028  | -0.000008 | 0.000042  | 0.000014  |
| 103 | 0.000021  | -0.000064 | -0.000042 | -0.000052 | 0.000000  | -0.000330 | -0.000088 | 0.000068  | 0.000018  | -0.000010 | 0.000050  | 0.000045  |
| 104 | 0.000019  | -0.000055 | -0.000028 | -0.000040 | 0.000008  | -0.000362 | -0.000074 | 0.000079  | 0.000031  | -0.000010 | 0.000045  | 0.000044  |
| 105 | 0.000133  | -0.000241 | -0.000117 | -0.000222 | -0.000078 | -0.000545 | 0.000038  | 0.000194  | 0.000123  | -0.000054 | 0.000003  | 0.000040  |
| 106 | 0.000185  | -0.000084 | -0.000053 | -0.000146 | -0.000047 | -0.000451 | -0.000020 | 0.000158  | 0.000090  | -0.000031 | 0.000017  | 0.000040  |
| 107 | -0.000401 | 0.000105  | 0.000301  | -0.000003 | 0.000331  | -0.000249 | -0.000076 | 0.000122  | 0.000027  | -0.000034 | 0.000018  | 0.000026  |
| 108 | 0.000448  | -0.000643 | -0.000368 | -0.000422 | -0.000280 | -0.000290 | 0.000077  | 0.000111  | 0.000036  | -0.000062 | -0.000021 | 0.000048  |
| 109 | -0.000092 | -0.000002 | -0.000006 | 0.000067  | 0.000147  | 0.029762  | -0.009773 | -0.014819 | -0.013245 | 0.009255  | 0.005345  | 0.001794  |
| 110 | 0.000176  | 0.000033  | -0.000110 | 0.000002  | 0.000255  | 0.000540  | 0.038617  | -0.002143 | -0.004331 | -0.007965 | -0.007415 | 0.004095  |

|     |           |           |           |           |           |           |           |           |           |           |           |           |
|-----|-----------|-----------|-----------|-----------|-----------|-----------|-----------|-----------|-----------|-----------|-----------|-----------|
| 111 | -0.000122 | -0.000053 | -0.000037 | 0.000015  | 0.000052  | 0.000251  | 0.001739  | -0.000055 | -0.000290 | -0.000218 | -0.000224 | 0.000186  |
| 112 | 0.000247  | 0.000103  | 0.000013  | 0.000065  | 0.000055  | 0.001903  | -0.000181 | -0.000849 | -0.001013 | 0.000320  | 0.000220  | 0.000049  |
| 113 | 0.000186  | -0.000069 | -0.000078 | -0.000054 | 0.000014  | -0.000799 | 0.001938  | 0.000269  | -0.000057 | -0.000197 | -0.000263 | 0.000140  |
| 114 | 0.000267  | 0.000046  | -0.000041 | 0.000083  | -0.000042 | 0.001771  | -0.000917 | -0.000887 | -0.000637 | 0.000268  | 0.000226  | 0.000119  |
| 115 | 0.000292  | 0.001107  | 0.000314  | 0.002206  | 0.004974  | -0.000599 | 0.002280  | 0.000061  | -0.000043 | -0.000237 | -0.000280 | 0.000199  |
| 116 | 0.003431  | 0.002078  | 0.000633  | 0.000838  | -0.000957 | 0.001172  | 0.000595  | -0.000765 | -0.000577 | 0.000053  | -0.000016 | 0.000106  |
| 117 | -0.000463 | 0.000154  | 0.000047  | 0.000002  | -0.000408 | 0.002215  | -0.004713 | -0.000017 | 0.000861  | -0.000499 | -0.000221 | -0.000050 |
| 118 | -0.000405 | 0.000034  | 0.000059  | 0.000009  | -0.000161 | 0.001104  | -0.002864 | 0.000130  | 0.000963  | -0.000465 | -0.000265 | 0.000024  |
| 119 | -0.000386 | 0.000161  | 0.000114  | 0.000055  | -0.000228 | 0.001459  | -0.002335 | -0.000185 | 0.000650  | -0.000376 | -0.000251 | 0.000121  |
| 120 | 0.000016  | -0.000182 | -0.000084 | -0.000066 | 0.000062  | -0.000181 | -0.001174 | 0.000420  | 0.000407  | -0.000169 | 0.000026  | -0.000170 |
| 121 | -0.000011 | 0.000096  | 0.000042  | 0.000034  | -0.000043 | 0.000071  | 0.000675  | -0.000209 | -0.000235 | 0.000085  | -0.000013 | 0.000087  |
| 122 | -0.000004 | 0.000087  | 0.000042  | 0.000032  | -0.000020 | 0.000115  | 0.000478  | -0.000208 | -0.000164 | 0.000080  | -0.000014 | 0.000082  |
| 123 | -0.000081 | -0.000118 | -0.000021 | -0.000040 | 0.000049  | -0.000033 | -0.001493 | 0.000221  | 0.000888  | -0.000252 | -0.000142 | -0.000009 |
| 124 | -0.000086 | 0.000049  | 0.000025  | 0.000017  | -0.000045 | -0.000184 | 0.000113  | 0.000178  | -0.000031 | -0.000074 | -0.000026 | -0.000033 |
| 125 | 0.000164  | 0.000067  | -0.000003 | 0.000024  | -0.000002 | 0.000209  | 0.001421  | -0.000404 | -0.000875 | 0.000331  | 0.000170  | 0.000044  |
| 126 | -0.000057 | 0.000264  | 0.000119  | 0.000060  | -0.000281 | 0.002247  | -0.001344 | -0.000999 | 0.000110  | -0.000089 | -0.000248 | 0.000382  |
| 127 | -0.000310 | 0.000078  | 0.000059  | 0.000022  | -0.000145 | 0.001027  | -0.002825 | -0.000316 | 0.001218  | -0.000319 | -0.000232 | 0.000136  |
| 128 | 0.000068  | -0.000017 | -0.000032 | -0.000013 | 0.000002  | -0.000082 | 0.000074  | 0.000105  | -0.000195 | 0.000028  | 0.000095  | -0.000083 |
| 129 | -0.000011 | 0.000045  | -0.000012 | -0.000010 | -0.000071 | 0.000076  | 0.000116  | -0.000117 | -0.000002 | 0.000031  | -0.000025 | 0.000042  |
| 130 | 0.000027  | 0.000056  | 0.000022  | 0.000020  | 0.000012  | 0.000101  | 0.000409  | -0.000224 | -0.000185 | 0.000095  | 0.000016  | 0.000049  |
| 131 | 0.000129  | 0.000055  | -0.000018 | -0.000014 | -0.000039 | -0.000145 | -0.000671 | 0.000349  | 0.000431  | -0.000224 | -0.000090 | -0.000032 |
| 132 | -0.000118 | -0.000055 | 0.000017  | 0.000005  | 0.000046  | 0.000100  | 0.000440  | -0.000312 | -0.000202 | 0.000154  | 0.000006  | 0.000064  |
| 133 | -0.000094 | -0.000084 | 0.000024  | 0.000012  | 0.000050  | -0.000053 | -0.000379 | 0.000204  | 0.000158  | -0.000086 | -0.000003 | -0.000041 |
| 134 | -0.000063 | 0.000337  | 0.000233  | 0.000052  | 0.000937  | -0.007866 | 0.008231  | 0.000846  | 0.001342  | 0.000398  | 0.000076  | 0.000325  |
| 135 | 0.000493  | -0.000212 | 0.000016  | 0.000276  | 0.001775  | -0.006956 | 0.006690  | 0.001094  | 0.001156  | 0.000428  | 0.000307  | -0.000054 |
| 136 | 0.000761  | -0.000001 | 0.000052  | -0.000182 | -0.001270 | -0.003095 | 0.003743  | 0.000581  | 0.000599  | 0.000420  | 0.000321  | 0.000037  |
| 137 | 0.000550  | 0.000180  | 0.000146  | -0.000183 | -0.000724 | 0.001366  | -0.001512 | -0.000219 | 0.000254  | 0.000598  | 0.000644  | 0.000039  |
| 138 | 0.000165  | 0.000330  | 0.000175  | -0.000198 | 0.000475  | -0.000952 | -0.003594 | 0.002576  | 0.004200  | -0.002588 | -0.001981 | 0.000647  |
| 139 | 0.000303  | -0.000051 | 0.000044  | 0.000014  | 0.000346  | -0.007144 | 0.014884  | 0.000558  | -0.001392 | -0.000733 | -0.000963 | 0.001878  |
| 140 | 0.000075  | 0.000106  | 0.000100  | -0.000026 | 0.000423  | 0.010186  | 0.005662  | -0.001858 | -0.003987 | -0.002427 | -0.001712 | 0.000950  |
| 141 | 0.000088  | 0.000012  | 0.000032  | -0.000031 | 0.000219  | 0.004550  | -0.003647 | -0.000800 | -0.001434 | 0.001151  | 0.000845  | -0.000271 |
| 142 | -0.000001 | -0.000047 | 0.000000  | 0.000001  | 0.000250  | -0.000229 | 0.005506  | -0.000550 | -0.001593 | 0.000023  | -0.000155 | 0.001213  |
| 143 | -0.000017 | -0.000076 | -0.000006 | 0.000000  | 0.000197  | -0.005357 | 0.011749  | -0.000066 | -0.000799 | -0.000494 | -0.000713 | 0.001656  |
| 144 | 0.000071  | 0.000064  | 0.000029  | -0.000042 | 0.000090  | -0.002831 | 0.004553  | 0.000245  | 0.000075  | -0.000309 | -0.000276 | 0.000473  |
| 145 | -0.000051 | -0.000007 | 0.000016  | 0.000016  | 0.000074  | -0.003330 | 0.006274  | 0.000061  | 0.000001  | -0.000313 | -0.000350 | 0.000794  |
| 146 | -0.000025 | 0.000014  | -0.000005 | -0.000005 | 0.000013  | -0.000764 | 0.001115  | 0.000024  | 0.000123  | -0.000049 | -0.000042 | 0.000154  |
| 147 | 0.000158  | 0.000034  | 0.000004  | -0.000028 | 0.000015  | 0.000042  | -0.000188 | -0.000064 | -0.000144 | 0.000018  | 0.000027  | -0.000127 |
| 148 | 0.000067  | 0.000130  | 0.000017  | -0.000040 | 0.000062  | -0.001836 | 0.001988  | 0.000215  | 0.000369  | -0.000226 | -0.000185 | 0.000077  |
| 149 | -0.000626 | 0.000346  | 0.000071  | -0.000080 | -0.000143 | -0.003021 | 0.001318  | 0.000463  | 0.001488  | -0.000220 | -0.000063 | 0.000085  |
| 150 | 0.000212  | 0.000368  | -0.000022 | -0.000170 | -0.000060 | -0.000849 | -0.000192 | 0.000191  | 0.000481  | -0.000064 | 0.000026  | -0.000172 |
| 151 | 0.001081  | 0.000287  | -0.000024 | -0.000076 | -0.000397 | -0.000554 | -0.000453 | 0.000243  | 0.000307  | -0.000016 | 0.000063  | -0.000216 |
| 152 | 0.001473  | 0.000134  | -0.000087 | -0.000131 | -0.000569 | -0.000979 | 0.001081  | 0.000354  | 0.000231  | -0.000118 | -0.000060 | 0.000059  |
| 153 | -0.000411 | 0.000103  | 0.000334  | 0.000486  | -0.000586 | -0.002990 | 0.003192  | 0.000562  | 0.000638  | -0.000118 | -0.000095 | 0.000205  |
| 154 | 0.000172  | 0.000149  | 0.000100  | -0.000033 | 0.000210  | -0.002094 | 0.013885  | 0.006710  | 0.006511  | -0.010260 | -0.008318 | 0.002668  |
| 155 | 0.000078  | -0.000009 | 0.000043  | 0.000002  | 0.000204  | -0.003489 | 0.006919  | 0.000181  | -0.000325 | -0.000363 | -0.000429 | 0.000881  |
| 156 | 0.000149  | 0.000191  | 0.000061  | -0.000064 | -0.000048 | -0.002858 | 0.002671  | 0.000544  | 0.000788  | -0.000315 | -0.000248 | 0.000090  |
| 157 | -0.001874 | -0.000061 | 0.000390  | 0.000520  | 0.001709  | -0.004218 | 0.004625  | 0.000712  | 0.000912  | -0.000132 | -0.000140 | 0.000282  |
| 158 | 0.000163  | 0.000003  | -0.000002 | -0.000012 | 0.000048  | 0.000191  | -0.001444 | 0.000012  | 0.000835  | -0.000174 | -0.000093 | -0.000027 |
| 159 | -0.000389 | -0.000451 | 0.000140  | 0.000152  | 0.000282  | -0.001096 | 0.005769  | -0.000837 | -0.002338 | 0.000815  | 0.000203  | 0.000363  |
| 160 | -0.000417 | -0.000405 | 0.000155  | 0.000147  | 0.000294  | -0.001089 | 0.005627  | -0.000764 | -0.002339 | 0.000792  | 0.000215  | 0.000320  |

|     |           |           |           |           |           |           |           |           |           |           |           |           |
|-----|-----------|-----------|-----------|-----------|-----------|-----------|-----------|-----------|-----------|-----------|-----------|-----------|
| 161 | -0.000215 | -0.000085 | 0.000037  | 0.000032  | 0.000092  | -0.000303 | 0.001846  | -0.000215 | -0.000941 | 0.000287  | 0.000123  | 0.000036  |
| 162 | 0.000003  | 0.000000  | -0.000004 | 0.000007  | 0.000010  | -0.000037 | 0.000008  | -0.000022 | -0.000067 | 0.000041  | 0.000031  | -0.000003 |
| 163 | -0.000720 | -0.000248 | 0.000086  | 0.000136  | 0.000103  | -0.000832 | 0.008697  | -0.000543 | -0.004914 | 0.001186  | 0.000488  | 0.000209  |
| 164 | -0.000440 | -0.000320 | -0.000283 | 0.000421  | 0.001224  | -0.004717 | 0.007519  | -0.000139 | -0.000104 | 0.000579  | 0.000232  | 0.000586  |
| 165 | 0.000493  | 0.000029  | 0.000122  | -0.000138 | -0.000645 | 0.000229  | 0.000670  | -0.000555 | -0.000685 | -0.000270 | -0.000386 | 0.000325  |
| 166 | -0.000100 | -0.000178 | -0.000063 | 0.000050  | 0.000500  | 0.000796  | -0.002808 | 0.000389  | -0.000365 | 0.001719  | 0.001750  | -0.001599 |
| 167 | 0.000114  | 0.000017  | 0.000062  | -0.000040 | 0.000418  | 0.004764  | -0.007404 | 0.001152  | 0.000587  | -0.000822 | -0.000530 | -0.001441 |
| 168 | -0.000007 | 0.000018  | 0.000009  | 0.000007  | 0.000055  | 0.002192  | 0.003171  | -0.001232 | -0.001793 | 0.000126  | 0.000110  | 0.000803  |
| 169 | -0.000002 | 0.000101  | 0.000012  | 0.000006  | -0.000392 | 0.004154  | -0.005826 | -0.000662 | 0.000321  | -0.000003 | 0.000169  | -0.000965 |
| 170 | -0.000006 | 0.000019  | 0.000039  | -0.000003 | -0.000048 | 0.004262  | -0.006069 | -0.000296 | -0.000657 | 0.000319  | 0.000351  | -0.000690 |
| 171 | 0.000060  | -0.000010 | 0.000010  | 0.000002  | -0.000028 | 0.001297  | -0.001827 | -0.000119 | -0.000282 | 0.000129  | 0.000124  | -0.000242 |
| 172 | -0.000197 | -0.000075 | -0.000002 | 0.000047  | -0.000047 | 0.001469  | -0.001786 | -0.000101 | -0.000146 | 0.000151  | 0.000136  | -0.000029 |
| 173 | 0.000245  | 0.000140  | 0.000009  | -0.000080 | 0.000046  | -0.001224 | -0.000369 | 0.000559  | 0.000628  | -0.000148 | -0.000025 | -0.000326 |
| 174 | -0.001335 | -0.000208 | 0.000017  | -0.000012 | 0.000427  | 0.000484  | -0.000309 | -0.000096 | -0.000129 | 0.000019  | 0.000025  | 0.000025  |
| 175 | 0.002279  | 0.000474  | -0.000214 | -0.000230 | -0.000416 | 0.001910  | -0.001915 | -0.000661 | -0.000476 | 0.000203  | 0.000116  | -0.000070 |
| 176 | 0.000003  | 0.000235  | 0.000143  | -0.000073 | 0.000973  | -0.019816 | 0.006596  | -0.001799 | -0.001422 | 0.007542  | 0.006352  | -0.003800 |
| 177 | -0.000197 | -0.000052 | 0.000020  | 0.000020  | 0.000415  | 0.017563  | -0.019442 | 0.004777  | 0.005670  | -0.006336 | -0.005078 | 0.000960  |
| 178 | -0.000215 | -0.000092 | -0.000087 | 0.000098  | -0.000146 | -0.004264 | 0.010314  | -0.000218 | 0.000267  | -0.000918 | -0.000885 | 0.001550  |
| 179 | 0.000388  | 0.000078  | 0.000072  | -0.000067 | 0.000035  | 0.000193  | 0.001216  | -0.000148 | -0.001030 | -0.000122 | -0.000156 | -0.000047 |
| 180 | 0.000388  | -0.000078 | -0.000005 | 0.000015  | 0.000021  | 0.003058  | -0.004138 | -0.000326 | -0.000994 | 0.000306  | 0.000298  | -0.000644 |
| 181 | -0.000011 | -0.000220 | 0.000030  | 0.000025  | 0.000008  | -0.002339 | 0.004222  | 0.000598  | 0.000252  | -0.000347 | -0.000331 | 0.000539  |
| 182 | 0.000330  | 0.000493  | -0.000436 | -0.001154 | -0.000037 | 0.001843  | 0.001275  | -0.000272 | -0.000919 | -0.000310 | -0.000345 | 0.000688  |
| 183 | -0.000437 | -0.000347 | 0.000217  | 0.001184  | -0.001701 | 0.002121  | -0.002767 | -0.001505 | -0.000225 | 0.000421  | 0.000368  | 0.000037  |
| 184 | -0.000199 | -0.000435 | 0.000129  | 0.000142  | 0.000289  | -0.001093 | 0.004898  | -0.000907 | -0.001657 | 0.000717  | 0.000139  | 0.000383  |
| 185 | -0.000508 | -0.000451 | 0.000142  | 0.000142  | 0.000210  | -0.001525 | 0.007038  | -0.000793 | -0.002796 | 0.000892  | 0.000236  | 0.000412  |
| 186 | 0.000178  | 0.000134  | -0.000024 | -0.000030 | -0.000085 | 0.000109  | -0.001444 | 0.000408  | 0.000628  | -0.000267 | -0.000062 | -0.000100 |
| 187 | 0.000535  | 0.000340  | -0.000159 | -0.000146 | -0.000141 | 0.001868  | -0.007747 | 0.000361  | 0.003321  | -0.000874 | -0.000312 | -0.000334 |
| 188 | 0.000011  | 0.000428  | -0.000092 | -0.000115 | -0.000283 | 0.000715  | -0.003073 | 0.000947  | 0.000653  | -0.000511 | -0.000019 | -0.000371 |
| 189 | -0.000060 | 0.000001  | -0.000025 | 0.000014  | -0.000008 | 0.000189  | 0.000157  | -0.000185 | -0.000220 | 0.000115  | 0.000056  | 0.000016  |
| 190 | 0.000001  | 0.000045  | 0.000019  | 0.000018  | 0.000018  | 0.237325  | 0.552858  | 0.508557  | 0.267412  | 0.147065  | 0.146482  | -0.551748 |
| 191 | 0.000015  | 0.000110  | 0.000082  | 0.000132  | -0.000006 | 0.130497  | 0.149612  | 0.308578  | 0.537413  | 0.515061  | 0.284990  | 0.150408  |
| 192 | -0.000017 | -0.000008 | 0.000004  | -0.000005 | -0.000015 | -0.565701 | -0.589303 | 0.154994  | 0.156643  | 0.298643  | 0.526535  | 0.518903  |
| 193 | 0.000001  | 0.000048  | 0.000039  | 0.000050  | 0.000020  | -0.583403 | -0.570384 | -0.534946 | -0.569923 | 0.152420  | 0.155164  | 0.289685  |
| 194 | -0.000068 | 0.000055  | 0.000079  | 0.000118  | 0.000025  | 0.133617  | 0.140214  | -0.570726 | -0.535281 | -0.539139 | -0.575170 | 0.148393  |
| 195 | 0.000007  | 0.000020  | 0.000032  | 0.000050  | 0.000083  | 0.568036  | 0.226195  | 0.136751  | 0.131073  | -0.549455 | -0.512852 | -0.515594 |
| 196 | 0.000026  | -0.000010 | -0.000024 | -0.000054 | -0.000009 | -0.051167 | -0.085398 | 0.123604  | 0.117664  | -0.064240 | -0.054884 | 0.008307  |
| 197 | -0.000018 | 0.000064  | 0.000046  | 0.000031  | -0.000041 | -0.003636 | 0.008797  | -0.055324 | -0.065462 | 0.118316  | 0.120298  | -0.067006 |
| 198 | -0.000012 | 0.000064  | 0.000060  | 0.000068  | -0.000005 | -0.005263 | -0.005099 | -0.001200 | 0.010210  | -0.056577 | -0.066156 | 0.118938  |
| 199 | -0.000036 | 0.000020  | 0.000043  | 0.000085  | -0.000005 | 0.008701  | -0.003894 | -0.005708 | -0.005671 | 0.000283  | 0.011970  | -0.056837 |
| 200 | -0.000001 | -0.000050 | -0.000027 | -0.000005 | 0.000031  | -0.078607 | -0.049626 | 0.012921  | 0.002863  | -0.004391 | -0.004675 | -0.002701 |
| 201 | 0.000070  | 0.000064  | 0.000038  | 0.000041  | 0.000036  | 0.000362  | 0.000349  | -0.000171 | -0.000264 | 0.000055  | -0.000009 | 0.000027  |
| 202 | -0.000050 | 0.000078  | 0.000048  | 0.000087  | -0.000031 | 0.000192  | 0.000283  | -0.000223 | -0.000008 | 0.000017  | -0.000037 | 0.000105  |
| 203 | -0.000042 | -0.000007 | -0.000006 | 0.000012  | -0.000020 | 0.000103  | 0.000148  | -0.000131 | -0.000041 | 0.000040  | 0.000003  | 0.000055  |
| 204 | 0.000012  | 0.000026  | 0.000025  | 0.000012  | 0.000016  | 0.000098  | -0.000137 | -0.000003 | -0.000032 | 0.000012  | 0.000012  | -0.000007 |
| 205 | 0.000013  | 0.000106  | 0.000081  | 0.000079  | 0.000005  | 0.000657  | 0.000438  | -0.000406 | -0.000325 | 0.000048  | -0.000062 | 0.000141  |
| 206 | -0.000036 | 0.000060  | 0.000025  | 0.000051  | -0.000026 | 0.000235  | 0.000292  | -0.000132 | -0.000040 | 0.000019  | -0.000041 | 0.000042  |
| 207 | -0.000005 | -0.000017 | -0.000012 | 0.000008  | 0.000011  | -0.000038 | 0.000002  | 0.000057  | 0.000004  | 0.000000  | 0.000013  | -0.000041 |
| 208 | -0.000020 | 0.000028  | 0.000042  | 0.000054  | 0.000005  | 0.000209  | 0.000159  | -0.000146 | -0.000085 | -0.000008 | -0.000029 | 0.000067  |
| 209 | -0.000021 | 0.000038  | 0.000035  | 0.000037  | -0.000018 | 0.000136  | 0.000131  | -0.000113 | -0.000042 | -0.000004 | -0.000025 | 0.000054  |
| 210 | 0.000008  | 0.000066  | 0.000035  | 0.000035  | -0.000011 | 0.000204  | 0.000169  | -0.000151 | -0.000077 | 0.000011  | -0.000032 | 0.000066  |

|     |           |           |           |           |           |           |           |           |           |           |           |           |
|-----|-----------|-----------|-----------|-----------|-----------|-----------|-----------|-----------|-----------|-----------|-----------|-----------|
| 211 | 0.000009  | 0.000020  | -0.000005 | -0.000008 | 0.000000  | -0.000105 | 0.000014  | 0.000023  | 0.000007  | 0.000032  | 0.000020  | -0.000025 |
| 212 | 0.000108  | 0.000063  | 0.000033  | 0.000043  | 0.000032  | 0.000303  | 0.000305  | -0.000199 | -0.000132 | 0.000020  | 0.000001  | 0.000102  |
| 213 | 0.000027  | 0.000094  | 0.000070  | 0.000081  | -0.000021 | 0.001403  | -0.000711 | -0.000540 | -0.000431 | 0.000156  | 0.000096  | 0.000057  |
| 214 | 0.000007  | 0.000057  | 0.000029  | 0.000046  | 0.000005  | 0.000235  | -0.000254 | -0.000059 | -0.000056 | 0.000010  | -0.000008 | -0.000022 |
| 215 | 0.000003  | 0.000013  | 0.000011  | -0.000016 | -0.000033 | -0.000615 | 0.000722  | 0.000136  | 0.000169  | -0.000083 | -0.000083 | 0.000049  |
| 216 | -0.000004 | 0.000139  | 0.000089  | 0.000096  | -0.000055 | -0.000110 | 0.000980  | -0.000170 | -0.000047 | -0.000060 | -0.000109 | 0.000159  |
| 217 | 0.000076  | 0.000060  | 0.000029  | 0.000031  | -0.000035 | 0.000501  | -0.000148 | -0.000202 | -0.000179 | 0.000036  | -0.000009 | -0.000007 |
| 218 | 0.000024  | -0.000028 | -0.000005 | -0.000007 | 0.000028  | -0.000056 | 0.000037  | 0.000036  | 0.000018  | -0.000015 | -0.000019 | -0.000006 |
| 219 | -0.000040 | 0.000046  | 0.000059  | 0.000070  | -0.000005 | 0.000118  | 0.000230  | -0.000110 | -0.000047 | -0.000009 | -0.000043 | 0.000054  |
| 220 | -0.000017 | 0.000062  | 0.000051  | 0.000050  | -0.000025 | 0.000152  | 0.000124  | -0.000109 | -0.000060 | -0.000003 | -0.000019 | 0.000048  |
| 221 | -0.000024 | 0.000070  | 0.000044  | 0.000020  | -0.000050 | 0.000121  | 0.000222  | -0.000119 | -0.000060 | -0.000001 | -0.000036 | 0.000055  |
| 222 | 0.000022  | 0.000006  | -0.000014 | -0.000043 | -0.000014 | -0.000135 | 0.000088  | 0.000050  | 0.000036  | -0.000011 | -0.000016 | -0.000010 |
| 223 | 0.083894  | -0.010208 | -0.004435 | -0.004725 | -0.008172 | 0.000676  | 0.000007  | -0.000236 | -0.000242 | 0.000006  | -0.000029 | 0.000068  |
| 224 | 0.085429  | 0.089616  | -0.006288 | -0.004897 | -0.005226 | 0.000304  | 0.000600  | -0.000359 | -0.000113 | 0.000011  | -0.000071 | 0.000142  |
| 225 | -0.006201 | 0.091500  | 0.089580  | -0.006680 | -0.001220 | -0.000324 | 0.000113  | 0.000081  | 0.000181  | -0.000053 | -0.000040 | 0.000005  |
| 226 | -0.001188 | -0.007360 | 0.089430  | 0.090590  | -0.006331 | 0.000127  | 0.000194  | -0.000098 | -0.000151 | 0.000035  | -0.000005 | 0.000025  |
| 227 | -0.005054 | -0.005384 | -0.007103 | 0.089596  | 0.083657  | 0.000572  | 0.000148  | -0.000285 | -0.000213 | -0.000025 | -0.000059 | 0.000102  |
| 228 | -0.007700 | -0.004347 | -0.005103 | -0.010589 | 0.081127  | 0.000512  | 0.000216  | -0.000357 | -0.000145 | 0.000060  | 0.000019  | 0.000048  |
| 229 | 5.289270  | 0.009522  | 0.002281  | 0.001538  | 0.003273  | -0.000154 | 0.000042  | 0.000049  | 0.000037  | 0.000011  | 0.000008  | -0.000016 |
| 230 | 0.009522  | 5.278960  | 0.008958  | 0.002803  | 0.001488  | 0.000184  | 0.000139  | -0.000143 | -0.000084 | 0.000025  | -0.000010 | 0.000062  |
| 231 | 0.002281  | 0.008958  | 5.290960  | 0.008982  | 0.002118  | 0.000137  | 0.000116  | -0.000120 | -0.000059 | 0.000001  | -0.000017 | 0.000053  |
| 232 | 0.001538  | 0.002803  | 0.008982  | 5.283020  | 0.009087  | 0.000182  | 0.000230  | -0.000164 | -0.000080 | -0.000014 | -0.000045 | 0.000076  |
| 233 | 0.003273  | 0.001488  | 0.002118  | 0.009087  | 5.297510  | 0.000029  | -0.000045 | 0.000003  | 0.000015  | -0.000022 | -0.000012 | -0.000013 |
| 234 | -0.000154 | 0.000184  | 0.000137  | 0.000182  | 0.000029  | 1.222970  | 0.442769  | -0.338015 | -0.307934 | -0.103625 | -0.168046 | 0.016041  |
| 235 | 0.000042  | 0.000139  | 0.000116  | 0.000230  | -0.000045 | 0.442769  | 1.231450  | -0.348180 | -0.311865 | -0.023529 | -0.108604 | 0.025261  |
| 236 | 0.000049  | -0.000143 | -0.000120 | -0.000164 | 0.000003  | -0.338015 | -0.348180 | 1.081830  | 0.570527  | -0.306644 | -0.279169 | -0.104737 |
| 237 | 0.000037  | -0.000084 | -0.000059 | -0.000080 | 0.000015  | -0.307934 | -0.311865 | 0.570527  | 1.077180  | -0.347114 | -0.305755 | -0.017290 |
| 238 | 0.000011  | 0.000025  | 0.000001  | -0.000014 | -0.000022 | -0.103625 | -0.023529 | -0.306644 | -0.347114 | 1.068910  | 0.561162  | -0.313474 |
| 239 | 0.000008  | -0.000010 | -0.000017 | -0.000045 | -0.000012 | -0.168046 | -0.108604 | -0.279169 | -0.305755 | 0.561162  | 1.070190  | -0.357698 |
| 240 | -0.000016 | 0.000062  | 0.000053  | 0.000076  | -0.000013 | 0.016041  | 0.025261  | -0.104737 | -0.017290 | -0.313474 | -0.357698 | 1.066960  |
| 241 | -0.000023 | 0.000073  | 0.000065  | 0.000094  | -0.000007 | 0.018670  | 0.022927  | -0.169625 | -0.104446 | -0.285532 | -0.314568 | 0.559799  |
| 242 | 0.000001  | -0.000040 | -0.000025 | -0.000024 | 0.000002  | -0.106633 | -0.169694 | 0.006277  | 0.008888  | -0.102329 | -0.014753 | -0.313124 |
| 243 | -0.000034 | -0.000028 | -0.000012 | 0.000026  | -0.000006 | -0.022102 | -0.104803 | 0.007846  | 0.007916  | -0.167234 | -0.102337 | -0.284713 |
| 244 | 0.000027  | -0.000057 | -0.000035 | -0.000091 | 0.000016  | -0.309529 | -0.312116 | -0.103466 | -0.166087 | 0.009805  | 0.011143  | -0.105567 |
| 245 | 0.000052  | -0.000121 | -0.000106 | -0.000189 | 0.000040  | -0.344469 | -0.343697 | -0.016648 | -0.104009 | 0.009609  | 0.008440  | -0.171427 |
| 246 | 0.000119  | 0.000220  | 0.000184  | 0.000146  | 0.000040  | 0.001508  | 0.000608  | -0.000540 | -0.000670 | -0.000073 | -0.000210 | 0.000180  |
| 247 | -0.000118 | 0.000138  | 0.000074  | 0.000172  | -0.000085 | 0.000141  | 0.001001  | -0.000563 | -0.000054 | 0.000066  | -0.000056 | 0.000266  |
| 248 | -0.000005 | -0.000142 | -0.000121 | -0.000122 | 0.000005  | -0.000747 | -0.000530 | 0.000461  | 0.000345  | 0.000013  | 0.000104  | -0.000185 |
| 249 | -0.000029 | -0.000078 | -0.000074 | -0.000072 | -0.000022 | -0.000467 | -0.000373 | 0.000229  | 0.000235  | 0.000029  | 0.000086  | -0.000085 |
| 250 | 0.000019  | 0.000005  | 0.000011  | 0.000003  | 0.000016  | 0.000038  | 0.000037  | 0.000002  | -0.000042 | -0.000020 | -0.000016 | 0.000001  |
| 251 | 0.000016  | -0.000028 | -0.000005 | -0.000017 | 0.000028  | -0.000031 | -0.000155 | 0.000083  | -0.000004 | -0.000010 | 0.000014  | -0.000044 |
| 252 | -0.000018 | 0.000042  | 0.000038  | 0.000047  | -0.000015 | 0.000218  | 0.000212  | -0.000185 | -0.000086 | -0.000004 | -0.000038 | 0.000084  |
| 253 | -0.000014 | 0.000053  | 0.000046  | 0.000054  | -0.000013 | 0.000225  | 0.000224  | -0.000184 | -0.000095 | -0.000009 | -0.000041 | 0.000085  |
| 254 | -0.000010 | -0.000014 | -0.000020 | -0.000012 | -0.000014 | -0.000082 | -0.000132 | 0.000040  | 0.000066  | 0.000018  | 0.000030  | -0.000013 |
| 255 | -0.000015 | 0.000013  | -0.000007 | -0.000005 | -0.000020 | 0.000011  | 0.000036  | -0.000032 | 0.000023  | 0.000016  | -0.000007 | 0.000016  |
| 256 | 0.000023  | -0.000076 | -0.000037 | -0.000064 | 0.000040  | -0.000232 | -0.000373 | 0.000223  | 0.000084  | -0.000005 | 0.000050  | -0.000109 |
| 257 | 0.000033  | -0.000132 | -0.000090 | -0.000129 | 0.000039  | -0.000577 | -0.000561 | 0.000463  | 0.000196  | -0.000018 | 0.000086  | -0.000197 |
| 258 | -0.000065 | 0.000176  | 0.000164  | 0.000197  | -0.000122 | -0.000835 | 0.002795  | -0.000242 | 0.000017  | -0.000149 | -0.000242 | 0.000387  |
| 259 | 0.000065  | 0.000200  | 0.000100  | 0.000158  | 0.000014  | 0.003438  | -0.002240 | -0.001161 | -0.001021 | 0.000353  | 0.000239  | 0.000006  |
| 260 | 0.000068  | -0.000141 | -0.000124 | -0.000149 | 0.000059  | 0.000045  | -0.001341 | 0.000287  | 0.000092  | 0.000075  | 0.000156  | -0.000217 |

|     |           |           |           |           |           |           |           |           |           |           |           |           |
|-----|-----------|-----------|-----------|-----------|-----------|-----------|-----------|-----------|-----------|-----------|-----------|-----------|
| 261 | 0.000026  | -0.000076 | -0.000056 | -0.000076 | 0.000033  | 0.000097  | -0.000900 | 0.000144  | 0.000043  | 0.000052  | 0.000086  | -0.000134 |
| 262 | -0.000021 | -0.000016 | -0.000007 | 0.000004  | 0.000017  | -0.000503 | 0.000651  | 0.000109  | 0.000137  | -0.000082 | -0.000088 | 0.000049  |
| 263 | -0.000032 | -0.000036 | -0.000001 | -0.000015 | -0.000002 | -0.000635 | 0.000534  | 0.000193  | 0.000192  | -0.000082 | -0.000067 | 0.000012  |
| 264 | -0.000029 | 0.000079  | 0.000060  | 0.000073  | -0.000020 | 0.000460  | -0.000024 | -0.000230 | -0.000159 | 0.000040  | 0.000013  | 0.000061  |
| 265 | -0.000012 | 0.000065  | 0.000047  | 0.000061  | -0.000014 | 0.000451  | -0.000033 | -0.000219 | -0.000158 | 0.000040  | 0.000019  | 0.000061  |
| 266 | 0.000009  | -0.000021 | -0.000023 | -0.000030 | -0.000006 | 0.000166  | -0.000397 | 0.000007  | -0.000032 | 0.000035  | 0.000034  | -0.000059 |
| 267 | -0.000001 | 0.000018  | -0.000007 | -0.000006 | -0.000030 | 0.000209  | -0.000227 | -0.000059 | -0.000076 | 0.000033  | 0.000021  | -0.000026 |
| 268 | 0.000001  | -0.000085 | -0.000047 | -0.000080 | 0.000030  | -0.001557 | 0.000901  | 0.000565  | 0.000504  | -0.000196 | -0.000141 | -0.000031 |
| 269 | -0.000008 | -0.000162 | -0.000105 | -0.000137 | 0.000039  | -0.001334 | 0.000278  | 0.000604  | 0.000460  | -0.000118 | -0.000030 | -0.000108 |
| 270 | -0.050204 | -0.004176 | -0.005483 | 0.008569  | -0.081245 | 0.001723  | 0.000528  | -0.000840 | -0.000872 | 0.000156  | -0.000006 | 0.000186  |
| 271 | -0.083045 | 0.009319  | -0.004620 | -0.003349 | -0.049250 | 0.000514  | 0.000859  | -0.000535 | 0.000051  | -0.000116 | -0.000189 | 0.000287  |
| 272 | 0.124747  | -0.054723 | -0.001030 | -0.005568 | 0.013752  | -0.000923 | -0.000481 | 0.000511  | 0.000389  | -0.000024 | 0.000076  | -0.000179 |
| 273 | 0.113604  | -0.065181 | 0.010381  | -0.005525 | 0.003442  | -0.000636 | -0.000177 | 0.000300  | 0.000304  | -0.000044 | 0.000012  | -0.000095 |
| 274 | -0.064080 | 0.119218  | -0.056560 | 0.000069  | -0.004434 | 0.000090  | -0.000027 | 0.000010  | -0.000065 | 0.000016  | -0.000004 | 0.000005  |
| 275 | -0.054553 | 0.119027  | -0.066076 | 0.011791  | -0.004687 | -0.000027 | -0.000148 | 0.000091  | -0.000024 | 0.000014  | 0.000024  | -0.000028 |
| 276 | 0.008206  | -0.067271 | 0.119540  | -0.056715 | -0.002712 | 0.000207  | 0.000275  | -0.000190 | -0.000095 | -0.000002 | -0.000037 | 0.000080  |
| 277 | -0.002806 | -0.057434 | 0.118157  | -0.066225 | 0.007969  | 0.000209  | 0.000259  | -0.000194 | -0.000109 | 0.000008  | -0.000029 | 0.000076  |
| 278 | -0.004838 | 0.012329  | -0.066495 | 0.119363  | -0.052898 | -0.000325 | 0.000021  | 0.000133  | 0.000162  | -0.000036 | -0.000014 | -0.000034 |
| 279 | -0.004558 | 0.000425  | -0.056950 | 0.117537  | -0.062407 | -0.000064 | 0.000114  | -0.000010 | 0.000068  | -0.000034 | -0.000028 | 0.000015  |
| 280 | 0.003403  | -0.005745 | 0.010299  | -0.065135 | 0.111848  | -0.000428 | -0.000386 | 0.000303  | 0.000085  | 0.000009  | 0.000063  | -0.000103 |
| 281 | 0.014108  | -0.005783 | -0.001161 | -0.054811 | 0.120620  | -0.000345 | -0.000831 | 0.000422  | 0.000108  | 0.000052  | 0.000131  | -0.000209 |
| 282 | 0.000081  | 0.000043  | -0.000025 | -0.000025 | 0.000040  | -0.018270 | 0.025261  | 0.001866  | -0.001153 | -0.000903 | -0.001537 | 0.000033  |
| 283 | 0.000040  | 0.000022  | 0.000007  | -0.000023 | -0.000029 | -0.003018 | 0.002340  | 0.001397  | 0.002769  | 0.000736  | 0.000683  | 0.000594  |
| 284 | -0.000027 | 0.000004  | 0.000019  | 0.000042  | 0.000017  | -0.001864 | -0.001377 | 0.000362  | 0.001499  | -0.001080 | -0.000634 | -0.001003 |
| 285 | -0.000014 | 0.000014  | 0.000016  | 0.000027  | -0.000003 | 0.001672  | -0.003147 | -0.000040 | -0.000108 | 0.000336  | -0.000437 | 0.000318  |
| 286 | -0.000004 | 0.000010  | 0.000010  | 0.000012  | -0.000011 | 0.002266  | -0.002039 | 0.000076  | 0.000212  | -0.002123 | -0.001379 | 0.000535  |
| 287 | 0.000006  | 0.000026  | 0.000025  | 0.000027  | -0.000004 | 0.001858  | -0.002895 | -0.003032 | -0.002546 | 0.000262  | 0.000989  | 0.000524  |
| 288 | -0.000095 | -0.000052 | -0.000006 | -0.000032 | 0.000021  | -0.000637 | 0.000653  | 0.000330  | 0.000176  | -0.000165 | -0.000144 | 0.000011  |
| 289 | -0.000023 | 0.000002  | 0.000001  | -0.000003 | -0.000004 | -0.000107 | 0.000484  | -0.000042 | -0.000039 | -0.000015 | -0.000054 | 0.000050  |
| 290 | 0.000012  | 0.000022  | 0.000006  | 0.000019  | 0.000001  | -0.000010 | -0.000116 | 0.000030  | 0.000015  | -0.000002 | 0.000020  | -0.000022 |
| 291 | 0.000012  | 0.000009  | 0.000005  | 0.000004  | 0.000006  | -0.000074 | -0.000070 | 0.000060  | 0.000025  | -0.000014 | 0.000012  | -0.000024 |
| 292 | 0.000010  | 0.000003  | 0.000002  | 0.000005  | 0.000001  | 0.000001  | -0.000214 | 0.000039  | 0.000022  | 0.000005  | 0.000024  | -0.000030 |
| 293 | 0.000016  | 0.000030  | 0.000013  | 0.000021  | -0.000004 | 0.000000  | -0.000181 | -0.000029 | 0.000019  | 0.000022  | 0.000028  | 0.000000  |
| 294 | -0.000014 | -0.000037 | -0.000014 | -0.000031 | 0.000058  | -0.000109 | 0.000073  | 0.000241  | 0.000005  | -0.000070 | -0.000081 | -0.000070 |
| 295 | -0.000027 | -0.000065 | -0.000022 | -0.000017 | 0.000037  | -0.000147 | 0.000016  | 0.000110  | 0.000049  | -0.000022 | -0.000012 | -0.000028 |
| 296 | 0.000003  | 0.000027  | 0.000012  | 0.000013  | -0.000017 | -0.000056 | -0.000039 | 0.000005  | 0.000031  | 0.000003  | 0.000011  | -0.000004 |
| 297 | 0.000004  | 0.000028  | 0.000007  | 0.000019  | -0.000004 | -0.000019 | 0.000014  | -0.000001 | 0.000007  | 0.000002  | -0.000002 | -0.000003 |
| 298 | 0.000007  | 0.000034  | 0.000017  | 0.000034  | -0.000003 | 0.000095  | 0.000005  | -0.000063 | -0.000034 | 0.000017  | 0.000005  | 0.000011  |
| 299 | 0.000004  | 0.000003  | -0.000005 | 0.000025  | 0.000006  | -0.000057 | -0.000069 | -0.000004 | 0.000034  | 0.000014  | 0.000024  | -0.000005 |
| 300 | 0.001116  | -0.000070 | 0.000305  | 0.000142  | -0.002010 | 0.000363  | -0.000695 | -0.000194 | 0.000074  | 0.000043  | 0.000060  | -0.000040 |
| 301 | 0.000609  | -0.000094 | 0.000218  | -0.000110 | 0.000612  | 0.000400  | -0.000261 | -0.000136 | -0.000083 | 0.000014  | 0.000014  | -0.000014 |
| 302 | 0.000055  | 0.000231  | 0.000231  | 0.000047  | 0.000662  | -0.000149 | -0.000064 | 0.000112  | 0.000046  | -0.000005 | 0.000010  | -0.000018 |
| 303 | -0.000249 | 0.000506  | -0.000270 | -0.000220 | 0.000611  | -0.000025 | -0.000088 | 0.000036  | 0.000006  | 0.000012  | 0.000025  | -0.000009 |
| 304 | -0.000076 | 0.000236  | -0.000275 | -0.000300 | -0.000021 | -0.000141 | 0.000089  | 0.000062  | 0.000036  | -0.000017 | -0.000008 | 0.000002  |
| 305 | 0.002005  | 0.000364  | -0.000137 | -0.000055 | 0.000267  | -0.000083 | -0.000156 | 0.000122  | 0.000023  | -0.000012 | 0.000017  | -0.000023 |
| 306 | 0.000108  | 0.000083  | 0.000045  | 0.000010  | -0.000041 | -0.030234 | -0.028390 | 0.006091  | 0.015144  | 0.006928  | 0.006349  | -0.002052 |
| 307 | 0.000035  | 0.000031  | -0.000015 | -0.000009 | -0.000002 | -0.002193 | 0.005062  | -0.001048 | 0.000591  | 0.001340  | 0.000629  | -0.000038 |
| 308 | 0.000007  | 0.000014  | 0.000016  | 0.000015  | 0.000005  | -0.004014 | 0.004797  | 0.001909  | 0.001539  | -0.002752 | -0.001634 | 0.001034  |
| 309 | -0.000008 | -0.000019 | -0.000011 | -0.000007 | 0.000020  | -0.000988 | 0.002242  | 0.000106  | -0.000177 | 0.000220  | 0.000075  | -0.000672 |
| 310 | -0.000011 | 0.000000  | -0.000003 | 0.000004  | -0.000015 | 0.001558  | -0.002879 | -0.000677 | -0.000735 | 0.000833  | 0.000851  | -0.001290 |

|     |           |           |           |           |           |           |           |           |           |           |           |           |
|-----|-----------|-----------|-----------|-----------|-----------|-----------|-----------|-----------|-----------|-----------|-----------|-----------|
| 311 | -0.000007 | -0.000009 | 0.000000  | 0.000007  | 0.000020  | -0.000956 | -0.005068 | 0.000180  | 0.000968  | 0.000707  | 0.001228  | -0.000296 |
| 312 | -0.000014 | -0.000017 | 0.000013  | -0.000009 | -0.000028 | 0.004922  | -0.003711 | -0.000517 | -0.001119 | -0.000927 | -0.000414 | 0.000955  |
| 313 | -0.000050 | -0.000009 | -0.000016 | -0.000009 | -0.000007 | -0.000705 | 0.001231  | -0.000044 | 0.000042  | -0.000014 | -0.000057 | 0.000085  |
| 314 | -0.000023 | -0.000042 | -0.000021 | -0.000039 | 0.000024  | -0.000172 | 0.000196  | 0.000115  | 0.000043  | -0.000072 | -0.000049 | 0.000005  |
| 315 | -0.000015 | 0.000021  | 0.000014  | 0.000015  | -0.000008 | -0.000188 | 0.000182  | 0.000075  | 0.000051  | -0.000032 | -0.000031 | 0.000000  |
| 316 | -0.000001 | 0.000005  | 0.000002  | 0.000004  | 0.000005  | 0.000062  | -0.000043 | -0.000013 | -0.000018 | 0.000009  | 0.000007  | -0.000005 |
| 317 | 0.000002  | -0.000019 | -0.000015 | -0.000016 | 0.000001  | 0.000002  | -0.000091 | 0.000022  | 0.000009  | 0.000001  | 0.000015  | -0.000014 |
| 318 | 0.000018  | 0.000020  | 0.000006  | 0.000006  | 0.000001  | 0.000112  | -0.000034 | -0.000055 | -0.000023 | 0.000005  | 0.000001  | 0.000013  |
| 319 | 0.000017  | 0.000025  | 0.000014  | 0.000030  | -0.000023 | 0.000180  | -0.000209 | -0.000143 | -0.000059 | 0.000089  | 0.000057  | 0.000001  |
| 320 | -0.000002 | -0.000107 | -0.000028 | 0.000043  | 0.000100  | -0.001110 | 0.000964  | 0.000295  | 0.000357  | -0.000157 | -0.000142 | -0.000011 |
| 321 | 0.000023  | -0.000017 | -0.000022 | -0.000011 | 0.000047  | -0.000006 | 0.000053  | 0.000092  | -0.000017 | -0.000028 | -0.000036 | -0.000032 |
| 322 | -0.000021 | -0.000002 | -0.000003 | 0.000003  | -0.000003 | -0.000159 | 0.000016  | 0.000088  | 0.000057  | -0.000020 | -0.000009 | -0.000020 |
| 323 | -0.000008 | 0.000009  | 0.000019  | -0.000002 | -0.000012 | 0.000100  | -0.000023 | -0.000053 | -0.000032 | 0.000013  | 0.000004  | 0.000011  |
| 324 | 0.000028  | 0.000014  | -0.000005 | -0.000006 | 0.000000  | 0.000059  | 0.000027  | -0.000021 | -0.000029 | -0.000004 | -0.000009 | 0.000010  |
| 325 | -0.000008 | -0.000011 | -0.000014 | -0.000005 | -0.000006 | -0.000123 | -0.000021 | 0.000036  | 0.000053  | -0.000002 | 0.000017  | -0.000010 |
| 326 | -0.000013 | 0.000008  | 0.000024  | 0.000020  | -0.000026 | 0.000140  | -0.000064 | -0.000146 | -0.000035 | 0.000042  | 0.000035  | 0.000041  |
| 327 | -0.004104 | -0.000233 | -0.000089 | -0.000298 | -0.007919 | 0.001284  | -0.001612 | -0.000138 | -0.000233 | 0.000062  | 0.000130  | -0.000066 |
| 328 | 0.002233  | -0.000653 | 0.000208  | 0.000223  | -0.000327 | 0.000224  | -0.000276 | -0.000117 | 0.000000  | 0.000032  | 0.000035  | -0.000007 |
| 329 | -0.001543 | 0.000883  | -0.000075 | 0.000230  | 0.000069  | 0.000007  | -0.000154 | 0.000023  | 0.000011  | 0.000009  | 0.000019  | -0.000025 |
| 330 | -0.000093 | -0.000201 | -0.000170 | -0.000356 | -0.000479 | -0.000048 | 0.000107  | -0.000005 | 0.000024  | -0.000017 | -0.000025 | 0.000014  |
| 331 | -0.000206 | -0.000397 | 0.000387  | 0.000010  | 0.000327  | 0.000024  | -0.000031 | -0.000021 | -0.000012 | 0.000021  | 0.000022  | 0.000004  |
| 332 | 0.000393  | 0.000123  | 0.000052  | 0.000766  | 0.000015  | -0.000142 | 0.000153  | 0.000064  | 0.000003  | -0.000010 | -0.000021 | -0.000001 |
| 333 | -0.000733 | 0.000151  | -0.000394 | -0.000781 | 0.000351  | -0.000069 | 0.000204  | 0.000057  | -0.000025 | -0.000035 | -0.000031 | 0.000015  |

|    | 241       | 242       | 243       | 244       | 245       | 246       | 247       | 248       | 249       | 250       | 251       | 252       |
|----|-----------|-----------|-----------|-----------|-----------|-----------|-----------|-----------|-----------|-----------|-----------|-----------|
| 1  | -0.000508 | 0.000133  | -0.000222 | 0.000879  | 0.001269  | -0.001741 | -0.001722 | 0.001360  | 0.001178  | -0.000347 | 0.000048  | -0.000483 |
| 2  | 0.001419  | 0.000156  | 0.001660  | -0.004059 | -0.004036 | 0.002057  | 0.008037  | -0.003751 | -0.004342 | 0.001679  | 0.000337  | 0.001271  |
| 3  | 0.000195  | 0.000168  | 0.000849  | 0.000871  | 0.001598  | 0.002581  | 0.003963  | -0.002143 | -0.002226 | 0.000065  | -0.000233 | 0.001239  |
| 4  | 0.001925  | -0.000251 | 0.000355  | -0.006042 | -0.005882 | -0.012731 | 0.020476  | -0.002215 | -0.002652 | 0.001341  | 0.000749  | 0.001292  |
| 5  | 0.001104  | -0.000415 | -0.000038 | -0.001725 | -0.002146 | 0.017677  | -0.015480 | -0.001441 | -0.002328 | 0.000078  | -0.000633 | 0.000742  |
| 6  | 0.001229  | 0.000059  | 0.000413  | -0.002289 | -0.002625 | 0.001808  | 0.004376  | -0.002242 | -0.001790 | 0.000036  | -0.000332 | 0.001289  |
| 7  | 0.000143  | -0.000331 | -0.000357 | -0.000010 | -0.000468 | 0.001937  | 0.000432  | -0.000467 | -0.000026 | -0.000439 | -0.000462 | 0.000260  |
| 8  | -0.000689 | 0.001039  | 0.000677  | 0.003021  | 0.003302  | -0.000258 | -0.000474 | -0.000079 | 0.000333  | -0.000072 | 0.000048  | 0.000207  |
| 9  | 0.002154  | -0.002318 | -0.000882 | -0.005766 | -0.004408 | 0.004328  | 0.003913  | -0.002390 | -0.002298 | 0.000195  | -0.000301 | 0.000597  |
| 10 | 0.004349  | -0.001614 | 0.000347  | -0.017092 | -0.019066 | -0.005916 | -0.012906 | 0.003430  | 0.003506  | 0.001106  | 0.001364  | -0.000726 |
| 11 | -0.000791 | 0.000984  | 0.000214  | 0.004866  | 0.006055  | -0.004507 | 0.051158  | -0.009809 | -0.011268 | -0.000568 | -0.001635 | 0.003615  |
| 12 | 0.000549  | -0.000829 | -0.000310 | -0.001493 | -0.001703 | 0.042353  | -0.006252 | -0.011917 | -0.010582 | -0.000195 | -0.002264 | 0.003038  |
| 13 | 0.000202  | 0.000290  | 0.000208  | -0.000198 | -0.000562 | -0.011230 | -0.005135 | 0.005150  | 0.003756  | 0.000230  | 0.000853  | -0.000800 |
| 14 | 0.000117  | -0.000164 | -0.000273 | 0.000639  | 0.000584  | 0.004061  | 0.003930  | -0.002398 | -0.001936 | 0.000041  | -0.000476 | 0.000610  |
| 15 | 0.000645  | -0.000098 | 0.000421  | -0.002246 | -0.002806 | -0.000487 | -0.000192 | 0.000129  | 0.000230  | -0.000137 | -0.000126 | 0.000194  |
| 16 | -0.001518 | -0.000483 | -0.000815 | 0.003469  | 0.003864  | 0.001386  | 0.000051  | -0.000250 | -0.000634 | 0.000087  | 0.000047  | -0.000143 |
| 17 | 0.001148  | -0.000786 | 0.000595  | -0.004374 | -0.004043 | 0.000216  | -0.000318 | -0.000416 | 0.000444  | 0.000047  | -0.000013 | 0.000142  |
| 18 | -0.000070 | -0.000469 | -0.001182 | -0.003397 | -0.001112 | -0.000401 | 0.001058  | 0.000388  | -0.000001 | -0.000278 | -0.000277 | -0.000121 |
| 19 | 0.000752  | -0.001616 | -0.001765 | -0.005426 | -0.006313 | 0.003110  | -0.019793 | 0.004310  | 0.005907  | -0.000817 | -0.000399 | -0.001915 |
| 20 | 0.001312  | -0.000839 | 0.000234  | -0.003494 | -0.004225 | 0.007578  | 0.007262  | -0.004525 | -0.005029 | 0.001131  | -0.000267 | 0.001023  |
| 21 | -0.002336 | 0.001488  | 0.000905  | 0.005221  | 0.006178  | -0.005412 | 0.023335  | -0.002037 | -0.005193 | -0.001079 | -0.000247 | 0.000469  |
| 22 | -0.000139 | -0.000038 | 0.000003  | 0.000095  | 0.000041  | 0.015367  | -0.002744 | -0.002966 | -0.001870 | -0.001157 | -0.001069 | 0.000244  |
| 23 | 0.000134  | -0.000040 | -0.000009 | 0.000029  | -0.000295 | 0.007532  | 0.007594  | -0.003974 | -0.003762 | 0.000216  | -0.001018 | 0.001160  |
| 24 | -0.000141 | 0.000007  | 0.000097  | -0.000300 | -0.000327 | -0.012076 | 0.000956  | 0.004115  | 0.003198  | 0.000151  | 0.000741  | -0.001810 |

|    |           |           |           |           |           |           |           |           |           |           |           |           |
|----|-----------|-----------|-----------|-----------|-----------|-----------|-----------|-----------|-----------|-----------|-----------|-----------|
| 25 | -0.000078 | -0.000114 | -0.000061 | -0.000433 | -0.000126 | 0.000890  | -0.000346 | -0.000144 | -0.000191 | 0.000136  | 0.000082  | -0.000182 |
| 26 | 0.000129  | -0.000050 | 0.000034  | 0.000338  | -0.000297 | 0.000423  | -0.000206 | -0.000190 | 0.000173  | -0.000116 | -0.000199 | 0.000095  |
| 27 | -0.000093 | -0.000149 | -0.000143 | -0.000303 | 0.000099  | 0.000410  | 0.000970  | -0.000104 | -0.000210 | -0.000029 | -0.000111 | -0.000109 |
| 28 | 0.004564  | 0.001660  | 0.001511  | -0.004216 | 0.000397  | -0.006783 | -0.007984 | 0.003932  | 0.004431  | -0.000467 | 0.000446  | -0.001022 |
| 29 | 0.006450  | 0.003029  | 0.004244  | -0.011687 | -0.008697 | 0.006594  | 0.006142  | -0.003299 | -0.003012 | 0.000619  | -0.000394 | 0.000209  |
| 30 | 0.000478  | -0.000316 | 0.000644  | -0.003560 | -0.004566 | -0.016732 | 0.018877  | -0.002286 | -0.007300 | 0.001829  | 0.002005  | 0.005615  |
| 31 | -0.001248 | 0.000649  | -0.000265 | 0.004009  | 0.004600  | 0.006718  | -0.014109 | -0.002843 | -0.006177 | 0.004111  | 0.002789  | 0.005293  |
| 32 | -0.000172 | -0.000185 | -0.000268 | -0.000037 | 0.000090  | 0.009011  | 0.004809  | -0.003704 | -0.003362 | 0.000183  | -0.000832 | 0.000213  |
| 33 | -0.000379 | 0.000106  | 0.000137  | 0.000944  | 0.000518  | -0.006337 | -0.007816 | 0.004180  | 0.003749  | -0.000277 | 0.000531  | -0.001215 |
| 34 | -0.001173 | 0.000289  | -0.000584 | 0.004216  | 0.004260  | 0.001257  | -0.001531 | 0.000300  | -0.000019 | -0.000304 | -0.000266 | -0.000269 |
| 35 | 0.000289  | -0.000828 | 0.000283  | -0.002974 | -0.002673 | -0.000186 | -0.000877 | 0.000078  | 0.000735  | 0.000206  | 0.000259  | -0.000319 |
| 36 | 0.000166  | -0.000078 | 0.000027  | -0.000254 | -0.000422 | -0.000061 | 0.000276  | -0.000023 | -0.000009 | -0.000040 | -0.000039 | 0.000037  |
| 37 | -0.001671 | 0.000271  | 0.000411  | 0.000808  | 0.000531  | 0.000141  | 0.000109  | -0.000128 | -0.000070 | 0.000017  | 0.000001  | 0.000056  |
| 38 | -0.001704 | 0.000196  | 0.000059  | 0.001976  | 0.001735  | 0.000520  | 0.000543  | -0.000418 | -0.000251 | 0.000049  | -0.000060 | 0.000163  |
| 39 | 0.000141  | -0.000096 | -0.000029 | -0.000244 | -0.000334 | 0.003835  | -0.007656 | 0.000522  | 0.001070  | 0.000761  | 0.000606  | -0.001836 |
| 40 | 0.000026  | -0.000003 | 0.000012  | -0.000079 | -0.000115 | -0.003679 | 0.002543  | 0.001129  | 0.001260  | 0.000101  | 0.000159  | -0.001748 |
| 41 | 0.000034  | -0.000016 | 0.000004  | -0.000027 | -0.000082 | 0.000371  | 0.000695  | -0.000313 | -0.000213 | -0.000026 | -0.000131 | 0.000149  |
| 42 | 0.000046  | -0.000020 | -0.000001 | -0.000043 | -0.000103 | 0.000073  | 0.000244  | -0.000080 | -0.000025 | -0.000022 | -0.000058 | 0.000038  |
| 43 | 0.000066  | -0.000031 | -0.000016 | -0.000029 | -0.000099 | 0.000064  | 0.000171  | -0.000067 | -0.000030 | -0.000006 | -0.000036 | 0.000034  |
| 44 | 0.000042  | -0.025576 | -0.016943 | -0.100225 | -0.126533 | 0.000553  | -0.000134 | -0.000114 | -0.000103 | -0.000043 | -0.000062 | 0.000026  |
| 45 | 0.000023  | 0.000006  | 0.000050  | -0.000133 | -0.000192 | 0.267666  | 0.271457  | -0.126135 | -0.101019 | -0.017432 | -0.026082 | 0.000361  |
| 46 | 0.000109  | -0.000006 | 0.000072  | -0.000300 | -0.000414 | 0.000634  | -0.000070 | -0.000223 | -0.000134 | -0.000004 | -0.000058 | 0.000046  |
| 47 | 0.000043  | -0.000018 | 0.000038  | -0.000198 | -0.000181 | 0.000036  | 0.000977  | -0.000159 | -0.000084 | -0.000077 | -0.000138 | 0.000054  |
| 48 | -0.000063 | -0.000019 | -0.000085 | -0.000134 | 0.000008  | -0.001362 | 0.000102  | 0.000800  | 0.000686  | -0.000147 | -0.000086 | -0.000300 |
| 49 | -0.000038 | 0.000042  | 0.000035  | 0.000189  | 0.000009  | 0.003314  | 0.000063  | -0.001051 | -0.000734 | -0.000249 | -0.000286 | 0.000414  |
| 50 | 0.000111  | 0.000229  | 0.000311  | 0.000227  | 0.000095  | 0.000724  | 0.000043  | -0.000649 | -0.000541 | 0.000108  | 0.000074  | 0.000226  |
| 51 | 0.000645  | -0.000574 | -0.000380 | -0.000665 | -0.001252 | 0.001545  | 0.000755  | -0.000693 | -0.000253 | -0.000164 | -0.000280 | 0.000281  |
| 52 | -0.000541 | 0.000364  | 0.000147  | 0.000572  | 0.001099  | -0.002279 | -0.000299 | 0.001243  | 0.000806  | -0.000034 | 0.000057  | -0.000436 |
| 53 | 0.000032  | -0.000020 | -0.000009 | -0.000018 | -0.000058 | 0.000524  | 0.000320  | -0.000186 | -0.000037 | -0.000091 | -0.000139 | 0.000076  |
| 54 | 0.000037  | -0.000040 | -0.000027 | -0.000009 | -0.000056 | 0.000522  | 0.000084  | -0.000181 | -0.000095 | -0.000042 | -0.000057 | 0.000069  |
| 55 | -0.000342 | 0.000150  | 0.000021  | 0.000310  | 0.000595  | 0.000531  | -0.000527 | 0.000174  | 0.000021  | -0.000080 | -0.000027 | -0.000089 |
| 56 | 0.000168  | -0.000051 | -0.000014 | 0.000225  | 0.000065  | 0.000481  | -0.000029 | -0.000221 | -0.000135 | 0.000012  | -0.000003 | 0.000069  |
| 57 | 0.000047  | -0.000041 | -0.000031 | -0.000036 | -0.000105 | -0.000108 | -0.000006 | 0.000008  | 0.000010  | 0.000010  | 0.000024  | 0.000002  |
| 58 | 0.000038  | 0.000027  | 0.000041  | -0.000051 | -0.000100 | -0.000061 | 0.000145  | -0.000069 | -0.000036 | 0.000016  | 0.000006  | 0.000049  |
| 59 | 0.000119  | -0.000060 | -0.000023 | -0.000136 | -0.000262 | 0.000070  | 0.000282  | -0.000137 | -0.000056 | -0.000017 | -0.000045 | 0.000078  |
| 60 | 0.000009  | -0.000047 | -0.000031 | -0.000005 | -0.000008 | -0.000083 | 0.000237  | -0.000066 | -0.000013 | 0.000034  | -0.000001 | -0.000003 |
| 61 | 0.000831  | -0.000832 | -0.000649 | -0.001277 | -0.002689 | -0.005316 | 0.003651  | 0.000398  | 0.000854  | 0.000422  | 0.000227  | -0.000280 |
| 62 | -0.001264 | 0.000934  | 0.000841  | 0.002968  | 0.003344  | 0.000910  | 0.000991  | 0.000321  | 0.000340  | -0.000338 | -0.000374 | -0.000219 |
| 63 | -0.000586 | 0.001228  | 0.001287  | 0.001950  | 0.001851  | 0.000007  | 0.001200  | 0.000367  | 0.000890  | -0.000107 | -0.000067 | -0.000380 |
| 64 | 0.000222  | -0.001025 | -0.000864 | -0.000749 | -0.001025 | -0.004089 | 0.002279  | 0.000335  | 0.000426  | 0.000376  | 0.000110  | -0.000166 |
| 65 | 0.000709  | -0.001695 | -0.001689 | -0.002833 | -0.002286 | -0.005851 | 0.001791  | 0.001570  | 0.001117  | -0.000133 | -0.000205 | -0.000182 |
| 66 | 0.000607  | 0.000470  | 0.000431  | -0.001508 | -0.001491 | 0.008382  | -0.004313 | -0.001774 | -0.001689 | -0.000193 | -0.000039 | 0.000649  |
| 67 | -0.001014 | 0.001280  | 0.001019  | 0.002281  | 0.003215  | 0.011306  | -0.006863 | -0.002306 | -0.002798 | -0.000204 | 0.000031  | 0.000789  |
| 68 | 0.000394  | -0.000398 | -0.000435 | -0.000659 | -0.000817 | -0.005239 | 0.001135  | 0.001088  | 0.000856  | 0.000174  | 0.000308  | -0.000216 |
| 69 | 0.001481  | 0.000631  | 0.000907  | -0.002677 | -0.001218 | -0.000277 | 0.002041  | -0.000210 | 0.000287  | -0.000360 | -0.000224 | -0.000120 |
| 70 | -0.000093 | -0.000101 | -0.000120 | -0.000199 | -0.000854 | -0.001520 | 0.002170  | -0.000732 | -0.002050 | 0.000789  | 0.000508  | 0.001453  |
| 71 | -0.001101 | -0.000049 | -0.000263 | 0.001981  | 0.001749  | 0.002659  | -0.001044 | -0.000403 | -0.000065 | -0.000358 | -0.000381 | -0.000155 |
| 72 | -0.000224 | -0.000512 | -0.000585 | 0.000650  | 0.000200  | -0.000076 | -0.003919 | 0.001214  | 0.001598  | -0.000103 | 0.000106  | -0.001083 |
| 73 | -0.001740 | 0.000655  | 0.000361  | 0.002402  | 0.003093  | -0.000466 | 0.000279  | 0.000009  | -0.000355 | 0.000141  | 0.000158  | 0.000212  |
| 74 | 0.000358  | -0.000730 | -0.000577 | -0.000888 | -0.000797 | 0.000841  | 0.000003  | -0.000310 | -0.000110 | 0.000086  | 0.000003  | -0.000098 |

|     |           |           |           |           |           |           |           |           |           |           |           |           |
|-----|-----------|-----------|-----------|-----------|-----------|-----------|-----------|-----------|-----------|-----------|-----------|-----------|
| 75  | 0.001351  | -0.000840 | -0.000527 | -0.002254 | -0.002778 | 0.000378  | 0.000134  | -0.000153 | 0.000118  | -0.000044 | -0.000098 | -0.000064 |
| 76  | -0.000525 | 0.002011  | 0.001263  | 0.005460  | 0.005721  | 0.001717  | 0.002818  | -0.001154 | -0.001856 | -0.000085 | -0.000146 | 0.000753  |
| 77  | 0.000865  | 0.000832  | -0.000132 | -0.000958 | -0.000039 | 0.002968  | -0.021752 | 0.004487  | 0.004981  | 0.000208  | 0.000506  | -0.002270 |
| 78  | 0.001943  | -0.001074 | -0.000351 | -0.005417 | -0.006376 | 0.001905  | 0.004650  | -0.001470 | -0.001099 | -0.000458 | -0.000583 | 0.000450  |
| 79  | 0.000455  | 0.000071  | 0.000393  | -0.002087 | -0.002378 | 0.000327  | 0.016648  | -0.003446 | -0.004003 | -0.000475 | -0.000783 | 0.001699  |
| 80  | -0.002671 | 0.001382  | 0.000729  | 0.006374  | 0.007543  | -0.025439 | 0.013495  | 0.002318  | 0.001957  | 0.001141  | 0.002024  | 0.000718  |
| 81  | 0.000642  | -0.000456 | -0.000342 | -0.000918 | -0.000788 | 0.009500  | -0.027101 | 0.003403  | 0.002312  | -0.000107 | 0.000771  | -0.000015 |
| 82  | -0.000050 | -0.000041 | 0.000034  | 0.000009  | -0.000173 | 0.010411  | 0.002107  | -0.004295 | -0.003463 | -0.000128 | -0.000868 | 0.001583  |
| 83  | -0.000070 | -0.000060 | 0.000035  | -0.000116 | -0.000282 | 0.004086  | 0.002040  | -0.001759 | -0.001535 | 0.000019  | -0.000314 | 0.000407  |
| 84  | 0.000116  | 0.000194  | 0.000147  | -0.000272 | -0.000021 | -0.014547 | 0.001323  | 0.004626  | 0.003739  | 0.000427  | 0.001109  | -0.002103 |
| 85  | 0.000192  | 0.000142  | 0.000104  | -0.000222 | -0.000006 | 0.000478  | 0.002796  | -0.001117 | -0.001038 | 0.000004  | -0.000096 | 0.000750  |
| 86  | -0.000085 | -0.000107 | -0.000010 | -0.000057 | -0.000130 | 0.000897  | -0.000248 | -0.000263 | -0.000139 | 0.000059  | -0.000016 | -0.000080 |
| 87  | -0.000080 | -0.000111 | -0.000042 | 0.000050  | -0.000069 | 0.000967  | 0.000069  | -0.000298 | -0.000171 | 0.000014  | -0.000084 | -0.000093 |
| 88  | 0.000706  | 0.000110  | 0.000146  | -0.001426 | -0.001410 | -0.001254 | 0.001189  | 0.000232  | -0.000094 | -0.000118 | -0.000076 | 0.000271  |
| 89  | -0.005902 | 0.002626  | -0.000536 | 0.016726  | 0.016625  | -0.001811 | -0.001667 | 0.000536  | 0.001100  | 0.000066  | 0.000180  | -0.000161 |
| 90  | -0.000306 | 0.000311  | 0.000149  | 0.000904  | 0.000898  | -0.028951 | -0.029159 | 0.016246  | 0.017343  | -0.000810 | 0.002466  | -0.006114 |
| 91  | -0.000265 | 0.000020  | -0.000119 | 0.000690  | 0.000637  | -0.000401 | -0.002532 | 0.000765  | 0.000583  | -0.000008 | 0.000142  | -0.000234 |
| 92  | -0.000295 | 0.000106  | -0.000004 | 0.001259  | 0.000957  | -0.000484 | -0.001368 | 0.000492  | 0.000564  | -0.000083 | 0.000053  | -0.000210 |
| 93  | -0.000267 | 0.000407  | 0.000282  | 0.000482  | 0.000549  | -0.000414 | -0.000035 | 0.000162  | 0.000058  | -0.000045 | 0.000003  | 0.000049  |
| 94  | -0.000090 | 0.000322  | 0.000294  | 0.000404  | 0.000244  | -0.000424 | 0.000029  | 0.000148  | 0.000052  | -0.000041 | -0.000006 | 0.000050  |
| 95  | -0.000112 | 0.000299  | 0.000225  | 0.001462  | 0.002176  | -0.000079 | -0.000250 | 0.000059  | -0.000088 | 0.000043  | 0.000082  | 0.000025  |
| 96  | -0.001230 | 0.000527  | 0.000284  | 0.000790  | 0.000593  | -0.000276 | 0.000085  | 0.000084  | -0.000038 | 0.000003  | 0.000019  | 0.000043  |
| 97  | -0.001222 | -0.000505 | -0.000843 | 0.001835  | 0.001845  | -0.001246 | -0.002392 | 0.000925  | 0.000619  | 0.000180  | 0.000304  | -0.000306 |
| 98  | -0.000722 | 0.001572  | 0.001187  | 0.003587  | 0.004535  | -0.000655 | -0.002276 | 0.000543  | 0.000480  | 0.000276  | 0.000279  | -0.000145 |
| 99  | -0.000171 | -0.000089 | -0.000212 | 0.000977  | 0.001095  | -0.001129 | -0.012502 | 0.002728  | 0.002498  | 0.000093  | 0.000116  | -0.000382 |
| 100 | -0.000311 | 0.000035  | -0.000164 | 0.001152  | 0.001313  | 0.000849  | -0.004175 | 0.000701  | 0.001494  | 0.000401  | 0.000682  | -0.001316 |
| 101 | 0.000036  | -0.000020 | -0.000047 | 0.000030  | 0.000110  | -0.001452 | 0.000087  | 0.001147  | 0.001337  | -0.000632 | -0.000274 | -0.001242 |
| 102 | 0.000007  | 0.000063  | 0.000014  | -0.000026 | 0.000075  | -0.008891 | -0.002251 | 0.003146  | 0.002110  | 0.000798  | 0.001180  | -0.000352 |
| 103 | 0.000036  | 0.000035  | -0.000015 | 0.000048  | 0.000140  | -0.001860 | -0.000858 | 0.000730  | 0.000640  | 0.000016  | 0.000139  | -0.000133 |
| 104 | 0.000035  | 0.000025  | -0.000019 | 0.000065  | 0.000141  | -0.002241 | -0.001187 | 0.001038  | 0.000904  | -0.000027 | 0.000183  | -0.000283 |
| 105 | 0.000041  | 0.000061  | 0.000006  | 0.000028  | 0.000065  | -0.000335 | 0.000044  | 0.000090  | 0.000045  | -0.000021 | 0.000016  | 0.000046  |
| 106 | 0.000042  | 0.000047  | 0.000004  | 0.000033  | 0.000070  | -0.000549 | 0.000195  | 0.000169  | 0.000087  | -0.000039 | 0.000000  | 0.000036  |
| 107 | 0.000028  | 0.000055  | 0.000011  | 0.000002  | 0.000068  | -0.000513 | 0.000013  | 0.000154  | 0.000086  | -0.000007 | 0.000039  | 0.000043  |
| 108 | 0.000050  | 0.000059  | 0.000034  | -0.000045 | 0.000000  | -0.000469 | -0.000072 | 0.000145  | 0.000089  | -0.000007 | 0.000044  | 0.000049  |
| 109 | 0.001678  | -0.006051 | -0.006433 | 0.001246  | 0.001431  | 0.001447  | 0.000378  | -0.000407 | -0.000913 | -0.000031 | -0.000036 | 0.000069  |
| 110 | 0.004284  | 0.003540  | 0.007133  | -0.018252 | -0.018290 | 0.000423  | 0.001236  | -0.000148 | -0.000208 | -0.000031 | -0.000141 | 0.000098  |
| 111 | 0.000234  | -0.000051 | 0.000024  | -0.000751 | -0.000844 | 0.007665  | 0.026822  | -0.004650 | -0.005384 | -0.005010 | -0.004684 | 0.003157  |
| 112 | 0.000037  | -0.000248 | -0.000160 | -0.000081 | 0.000005  | 0.021419  | 0.002128  | -0.011282 | -0.011600 | 0.005499  | 0.001972  | 0.002887  |
| 113 | 0.000176  | 0.000146  | 0.000193  | -0.000722 | -0.000822 | 0.000223  | 0.001463  | -0.000273 | -0.000342 | -0.000133 | -0.000218 | 0.000122  |
| 114 | 0.000090  | -0.000163 | -0.000073 | 0.000024  | 0.000178  | 0.000217  | 0.001060  | -0.000510 | -0.000261 | 0.000139  | 0.000076  | 0.000123  |
| 115 | 0.000214  | 0.000065  | 0.000091  | -0.000901 | -0.000858 | 0.000874  | 0.000295  | -0.000302 | -0.000564 | 0.000019  | -0.000087 | 0.000113  |
| 116 | 0.000068  | -0.000172 | -0.000091 | -0.000312 | -0.000065 | -0.000438 | 0.001109  | -0.000176 | 0.000014  | 0.000061  | 0.000032  | 0.000091  |
| 117 | -0.000227 | 0.000442  | 0.000436  | 0.000970  | 0.000795  | 0.003329  | -0.001349 | -0.001161 | -0.001143 | -0.000038 | 0.000058  | 0.000364  |
| 118 | -0.000111 | 0.000299  | 0.000314  | 0.000393  | 0.000475  | 0.000107  | -0.000383 | -0.000181 | -0.000305 | 0.000109  | 0.000151  | 0.000032  |
| 119 | -0.000004 | 0.000220  | 0.000271  | 0.000241  | 0.000185  | 0.001942  | -0.000339 | -0.000886 | -0.000772 | 0.000088  | 0.000062  | 0.000279  |
| 120 | -0.000199 | 0.000190  | 0.000139  | 0.000258  | 0.000450  | -0.000835 | -0.000305 | 0.000341  | 0.000128  | 0.000081  | 0.000121  | -0.000137 |
| 121 | 0.000100  | -0.000098 | -0.000069 | -0.000142 | -0.000252 | 0.000592  | 0.000248  | -0.000242 | -0.000106 | -0.000066 | -0.000091 | 0.000110  |
| 122 | 0.000097  | -0.000091 | -0.000068 | -0.000112 | -0.000193 | 0.000227  | 0.000059  | -0.000094 | -0.000018 | -0.000014 | -0.000029 | 0.000025  |
| 123 | -0.000087 | 0.000173  | 0.000151  | 0.000199  | 0.000382  | -0.000686 | -0.000307 | 0.000346  | 0.000180  | 0.000057  | 0.000102  | -0.000179 |
| 124 | -0.000037 | 0.000069  | 0.000047  | 0.000015  | -0.000038 | 0.000532  | 0.000126  | -0.000277 | -0.000173 | -0.000049 | -0.000046 | 0.000124  |



|     |           |           |           |           |           |           |           |           |           |           |           |           |
|-----|-----------|-----------|-----------|-----------|-----------|-----------|-----------|-----------|-----------|-----------|-----------|-----------|
| 125 | 0.000128  | -0.000245 | -0.000200 | -0.000222 | -0.000354 | 0.000182  | 0.000178  | -0.000079 | -0.000014 | -0.000009 | -0.000057 | 0.000059  |
| 126 | 0.000305  | -0.000064 | 0.000080  | -0.000093 | -0.000291 | 0.000656  | -0.000287 | -0.000512 | -0.000455 | 0.000189  | 0.000150  | 0.000115  |
| 127 | -0.000001 | 0.000254  | 0.000296  | 0.000346  | 0.000409  | -0.000513 | -0.000063 | -0.000040 | -0.000143 | 0.000142  | 0.000144  | -0.000010 |
| 128 | -0.000056 | -0.000001 | -0.000019 | 0.000046  | 0.000087  | -0.000143 | -0.000068 | 0.000075  | 0.000033  | 0.000020  | 0.000013  | -0.000019 |
| 129 | 0.000039  | -0.000017 | -0.000008 | -0.000041 | -0.000093 | 0.000024  | 0.000078  | -0.000056 | -0.000013 | -0.000012 | -0.000007 | 0.000024  |
| 130 | 0.000074  | -0.000047 | -0.000032 | -0.000091 | -0.000166 | 0.000197  | 0.000177  | -0.000113 | -0.000061 | -0.000038 | -0.000054 | 0.000063  |
| 131 | -0.000084 | 0.000095  | 0.000087  | 0.000095  | 0.000188  | -0.000131 | -0.000011 | 0.000066  | 0.000052  | 0.000002  | 0.000006  | -0.000028 |
| 132 | 0.000082  | -0.000062 | -0.000044 | -0.000084 | -0.000141 | 0.000044  | -0.000100 | 0.000008  | -0.000011 | 0.000019  | 0.000018  | -0.000023 |
| 133 | -0.000056 | 0.000034  | 0.000017  | 0.000077  | 0.000129  | 0.000003  | -0.000081 | 0.000023  | 0.000003  | 0.000011  | 0.000025  | -0.000018 |
| 134 | 0.000551  | 0.000191  | 0.000283  | -0.002274 | -0.002080 | 0.002023  | -0.001751 | -0.000486 | -0.000546 | 0.000045  | -0.000010 | 0.000176  |
| 135 | 0.000083  | 0.000098  | 0.000136  | -0.001743 | -0.001235 | 0.000552  | -0.000858 | -0.000030 | 0.000129  | 0.000099  | 0.000043  | -0.000028 |
| 136 | 0.000297  | -0.000295 | -0.000311 | -0.001110 | -0.001181 | 0.000714  | -0.001211 | -0.000066 | 0.000122  | 0.000120  | 0.000085  | -0.000041 |
| 137 | 0.000311  | -0.000491 | -0.000653 | -0.000020 | -0.000313 | 0.000839  | -0.001108 | -0.000343 | -0.000288 | 0.000063  | 0.000106  | 0.000156  |
| 138 | 0.000916  | 0.001158  | 0.001984  | -0.001250 | -0.001147 | 0.002090  | -0.002830 | -0.000651 | -0.000519 | 0.000165  | 0.000212  | 0.000184  |
| 139 | 0.002090  | -0.001049 | -0.001321 | -0.003968 | -0.002847 | 0.006674  | -0.008012 | -0.001728 | -0.001174 | 0.000509  | 0.000558  | 0.000198  |
| 140 | 0.000832  | 0.000643  | 0.001350  | -0.005486 | -0.004215 | 0.004463  | -0.005566 | -0.001144 | -0.001025 | 0.000283  | 0.000477  | -0.000034 |
| 141 | -0.000108 | -0.000795 | -0.000737 | 0.000642  | 0.000591  | 0.000381  | -0.002162 | -0.000277 | 0.000042  | -0.000173 | -0.000015 | -0.000116 |
| 142 | 0.001410  | -0.000900 | -0.000896 | -0.002233 | -0.001606 | -0.002491 | 0.001615  | 0.000830  | 0.000525  | -0.001056 | -0.000782 | -0.000015 |
| 143 | 0.001833  | -0.000929 | -0.001025 | -0.003192 | -0.002682 | -0.005669 | -0.004793 | -0.000072 | 0.001434  | 0.002312  | 0.001427  | -0.000050 |
| 144 | 0.000538  | -0.000174 | -0.000256 | -0.001216 | -0.000829 | 0.004629  | -0.001752 | -0.001274 | -0.002235 | -0.000252 | 0.000179  | 0.001085  |
| 145 | 0.000899  | -0.000262 | -0.000280 | -0.001914 | -0.001587 | -0.004008 | 0.011538  | -0.003236 | -0.003515 | 0.002353  | 0.001626  | 0.000665  |
| 146 | 0.000190  | -0.000032 | -0.000028 | -0.000371 | -0.000322 | -0.001726 | 0.001583  | 0.000008  | 0.000382  | -0.001053 | -0.001057 | 0.000358  |
| 147 | -0.000159 | 0.000037  | -0.000005 | 0.000355  | 0.000207  | 0.002490  | 0.000821  | -0.001328 | -0.001587 | -0.001224 | -0.001185 | 0.001341  |
| 148 | 0.000078  | 0.000123  | 0.000073  | -0.000280 | -0.000400 | 0.003643  | 0.000363  | -0.001480 | -0.001908 | -0.000634 | -0.000573 | 0.001152  |
| 149 | 0.000138  | 0.000162  | 0.000139  | -0.000295 | -0.000200 | 0.001744  | -0.000999 | -0.000524 | -0.000672 | 0.000016  | 0.000110  | 0.000284  |
| 150 | -0.000177 | 0.000067  | 0.000043  | 0.000344  | 0.000299  | 0.002508  | -0.001415 | -0.000755 | -0.001158 | -0.000061 | 0.000040  | 0.000410  |
| 151 | -0.000229 | 0.000030  | 0.000006  | 0.000368  | 0.000449  | 0.001286  | -0.000857 | -0.000347 | -0.000677 | -0.000048 | 0.000012  | 0.000227  |
| 152 | 0.000088  | -0.000122 | -0.000141 | -0.000409 | 0.000015  | 0.000842  | -0.000588 | -0.000057 | -0.000172 | -0.000002 | 0.000012  | 0.000064  |
| 153 | 0.000289  | -0.000062 | -0.000031 | -0.001022 | -0.000569 | 0.000481  | -0.000311 | -0.000018 | -0.000003 | 0.000018  | 0.000000  | 0.000051  |
| 154 | 0.003051  | 0.005659  | 0.008159  | -0.014203 | -0.011840 | 0.002989  | -0.002579 | -0.000913 | -0.001073 | 0.000172  | 0.000179  | 0.000267  |
| 155 | 0.001008  | -0.000316 | -0.000372 | -0.002047 | -0.001653 | -0.004351 | 0.005426  | -0.008654 | -0.009894 | 0.009161  | 0.007086  | 0.001873  |
| 156 | 0.000119  | 0.000117  | 0.000078  | -0.000543 | -0.000450 | 0.002366  | -0.000584 | -0.001124 | -0.001295 | -0.000100 | -0.000035 | 0.000660  |
| 157 | 0.000426  | 0.000059  | 0.000121  | -0.001503 | -0.001141 | 0.001610  | -0.001214 | -0.000457 | -0.000475 | 0.000074  | 0.000066  | 0.000204  |
| 158 | -0.000091 | 0.000154  | 0.000142  | 0.000214  | 0.000276  | 0.000719  | 0.000077  | -0.000147 | -0.000066 | -0.000058 | -0.000079 | 0.000057  |
| 159 | 0.000595  | -0.000472 | -0.000388 | -0.001122 | -0.001483 | 0.004546  | -0.000449 | -0.001398 | -0.001127 | -0.000254 | -0.000358 | 0.000572  |
| 160 | 0.000544  | -0.000452 | -0.000376 | -0.001065 | -0.001407 | 0.003646  | -0.000382 | -0.001170 | -0.000976 | -0.000172 | -0.000265 | 0.000486  |
| 161 | 0.000129  | -0.000167 | -0.000142 | -0.000278 | -0.000372 | -0.000570 | 0.000345  | 0.000042  | 0.000046  | 0.000015  | -0.000002 | 0.000013  |
| 162 | 0.000007  | -0.000060 | -0.000069 | 0.000127  | 0.000045  | -0.000271 | 0.000254  | 0.000080  | 0.000031  | -0.000023 | -0.000007 | -0.000022 |
| 163 | 0.000618  | -0.000906 | -0.000825 | -0.001364 | -0.001796 | -0.002877 | 0.001258  | 0.000303  | 0.000253  | 0.000126  | 0.000088  | -0.000021 |
| 164 | 0.000814  | -0.000329 | -0.000371 | -0.002044 | -0.002010 | 0.001094  | -0.001728 | -0.000121 | 0.000119  | 0.000181  | 0.000134  | -0.000050 |
| 165 | 0.000139  | 0.000456  | 0.000393  | -0.000166 | -0.000142 | -0.000299 | 0.000547  | 0.000022  | -0.000016 | -0.000054 | -0.000049 | 0.000038  |
| 166 | -0.001595 | -0.000971 | -0.001274 | 0.001786  | 0.002188  | -0.001371 | 0.002094  | 0.000519  | 0.000409  | -0.000132 | -0.000197 | -0.000212 |
| 167 | -0.001704 | 0.001205  | 0.001215  | 0.001024  | 0.001995  | 0.003662  | -0.001059 | -0.001011 | -0.001562 | -0.000387 | -0.000184 | 0.000397  |
| 168 | 0.000937  | -0.000643 | -0.000474 | -0.001669 | -0.001556 | 0.002114  | 0.001987  | -0.000477 | -0.001359 | 0.000104  | 0.000147  | 0.000370  |
| 169 | -0.001118 | 0.000808  | 0.001090  | 0.001550  | 0.000465  | 0.001108  | -0.003873 | 0.000239  | 0.001762  | -0.000609 | -0.000364 | -0.000943 |
| 170 | -0.000836 | -0.000010 | -0.000010 | 0.001797  | 0.001845  | 0.008701  | -0.006394 | -0.000886 | -0.001537 | -0.001496 | -0.001463 | 0.001202  |
| 171 | -0.000293 | 0.000000  | -0.000009 | 0.000643  | 0.000581  | 0.000985  | 0.001755  | -0.001063 | -0.001174 | -0.001046 | -0.001214 | 0.000982  |
| 172 | -0.000027 | -0.000101 | -0.000043 | 0.000143  | 0.000339  | -0.003851 | 0.002083  | 0.000770  | 0.001249  | 0.000950  | 0.000636  | -0.001016 |
| 173 | -0.000362 | 0.000124  | 0.000073  | 0.000454  | 0.000612  | 0.002251  | -0.001541 | -0.000600 | -0.001154 | -0.000054 | 0.000050  | 0.000370  |
| 174 | 0.000029  | -0.000063 | -0.000064 | 0.000022  | 0.000055  | 0.000134  | -0.000046 | 0.000007  | -0.000003 | -0.000014 | -0.000009 | 0.000003  |

|     |           |           |           |           |           |           |           |           |           |           |           |           |
|-----|-----------|-----------|-----------|-----------|-----------|-----------|-----------|-----------|-----------|-----------|-----------|-----------|
| 175 | -0.000114 | 0.000144  | 0.000171  | 0.000679  | 0.000016  | -0.001090 | 0.000735  | 0.000045  | 0.000236  | 0.000016  | 0.000000  | -0.000081 |
| 176 | -0.004437 | -0.003587 | -0.005162 | 0.010941  | 0.008558  | -0.001179 | 0.003177  | -0.000324 | -0.000915 | -0.000232 | -0.000112 | 0.000531  |
| 177 | 0.001539  | 0.004505  | 0.006270  | -0.006441 | -0.003918 | -0.000901 | 0.003862  | 0.001309  | 0.000354  | -0.001005 | -0.000984 | -0.000181 |
| 178 | 0.001792  | -0.000060 | 0.000201  | -0.003879 | -0.003924 | 0.018273  | -0.033683 | 0.006088  | 0.010619  | -0.005392 | -0.004025 | -0.003262 |
| 179 | -0.000186 | -0.000179 | -0.000354 | 0.000452  | 0.000352  | -0.020733 | 0.023631  | -0.004836 | -0.006850 | 0.006872  | 0.005370  | 0.001481  |
| 180 | -0.000791 | 0.000038  | -0.000029 | 0.001757  | 0.001467  | 0.003301  | 0.000397  | -0.001682 | -0.002664 | 0.000311  | 0.000178  | 0.000709  |
| 181 | 0.000649  | -0.000312 | -0.000305 | -0.001757 | -0.000870 | 0.000722  | -0.000639 | 0.000290  | 0.000417  | -0.000095 | -0.000056 | -0.000011 |
| 182 | 0.000729  | -0.000367 | -0.000383 | -0.001235 | -0.000704 | -0.001889 | 0.000809  | 0.000883  | 0.001442  | 0.000127  | 0.000052  | -0.000530 |
| 183 | 0.000041  | 0.000083  | -0.000067 | 0.001425  | 0.000070  | 0.001318  | -0.000902 | -0.000867 | -0.001033 | -0.000017 | 0.000128  | 0.000475  |
| 184 | 0.000576  | -0.000362 | -0.000283 | -0.001029 | -0.001379 | 0.002514  | -0.000274 | -0.001005 | -0.000904 | -0.000097 | -0.000188 | 0.000499  |
| 185 | 0.000683  | -0.000547 | -0.000448 | -0.001366 | -0.001777 | 0.005304  | -0.001200 | -0.001542 | -0.001341 | -0.000203 | -0.000279 | 0.000574  |
| 186 | -0.000182 | 0.000151  | 0.000123  | 0.000261  | 0.000374  | -0.000154 | 0.000027  | 0.000104  | 0.000122  | 0.000009  | 0.000014  | -0.000050 |
| 187 | -0.000608 | 0.000578  | 0.000490  | 0.001432  | 0.001811  | -0.004728 | 0.001095  | 0.001417  | 0.001223  | 0.000148  | 0.000225  | -0.000530 |
| 188 | -0.000493 | 0.000210  | 0.000145  | 0.000757  | 0.001038  | -0.003072 | 0.000365  | 0.001061  | 0.000926  | 0.000154  | 0.000241  | -0.000506 |
| 189 | 0.000046  | -0.000063 | -0.000061 | -0.000011 | -0.000038 | -0.000009 | 0.000002  | 0.000004  | -0.000001 | -0.000009 | 0.000008  | 0.000001  |
| 190 | -0.515545 | -0.513204 | -0.550068 | 0.132758  | 0.138075  | 0.000378  | 0.000323  | -0.000262 | -0.000231 | 0.000070  | 0.000023  | 0.000061  |
| 191 | 0.149208  | -0.574805 | -0.538880 | -0.538159 | -0.573886 | 0.000095  | 0.000497  | -0.000170 | -0.000031 | -0.000035 | -0.000108 | 0.000105  |
| 192 | 0.290053  | 0.154816  | 0.151909  | -0.566023 | -0.531405 | 0.000218  | 0.000108  | -0.000126 | -0.000113 | 0.000043  | 0.000006  | 0.000033  |
| 193 | 0.517698  | 0.527987  | 0.299182  | 0.159215  | 0.157332  | -0.000046 | -0.000080 | -0.000015 | 0.000043  | 0.000014  | 0.000033  | 0.000013  |
| 194 | 0.149882  | 0.291809  | 0.521948  | 0.531460  | 0.302959  | 0.000424  | 0.000498  | -0.000404 | -0.000223 | 0.000036  | -0.000034 | 0.000156  |
| 195 | -0.551983 | 0.142709  | 0.143802  | 0.266093  | 0.515196  | 0.001267  | -0.000652 | -0.000396 | -0.000390 | 0.000157  | 0.000122  | 0.000035  |
| 196 | -0.002981 | -0.004875 | -0.004616 | 0.003760  | 0.014827  | -0.000057 | 0.000033  | 0.000044  | 0.000004  | -0.000017 | 0.000014  | -0.000017 |
| 197 | -0.057317 | 0.012158  | 0.000258  | -0.005525 | -0.005553 | 0.000150  | 0.000195  | -0.000139 | -0.000061 | -0.000009 | -0.000030 | 0.000066  |
| 198 | 0.118813  | -0.066366 | -0.056725 | 0.010442  | -0.001014 | 0.000168  | 0.000071  | -0.000132 | -0.000057 | 0.000009  | -0.000008 | 0.000057  |
| 199 | -0.066550 | 0.118176  | 0.118665  | -0.064758 | -0.054375 | 0.000215  | 0.000097  | -0.000159 | -0.000081 | 0.000024  | -0.000005 | 0.000056  |
| 200 | 0.007911  | -0.053298 | -0.062830 | 0.109973  | 0.122439  | 0.000004  | -0.000122 | 0.000002  | -0.000033 | 0.000040  | 0.000047  | -0.000012 |
| 201 | 0.000007  | -0.000091 | -0.000075 | -0.000079 | -0.000111 | 0.233506  | 0.556183  | 0.514182  | 0.266221  | 0.145065  | 0.143923  | -0.552833 |
| 202 | 0.000110  | -0.000027 | 0.000029  | -0.000121 | -0.000320 | 0.141244  | 0.133865  | 0.302695  | 0.531185  | 0.520236  | 0.289877  | 0.150140  |
| 203 | 0.000065  | -0.000024 | -0.000004 | -0.000077 | -0.000138 | -0.567708 | -0.581974 | 0.156630  | 0.158456  | 0.298414  | 0.526741  | 0.517081  |
| 204 | -0.000015 | -0.000027 | -0.000044 | 0.000062  | 0.000080  | -0.586726 | -0.564715 | -0.532134 | -0.566883 | 0.151374  | 0.154268  | 0.290016  |
| 205 | 0.000133  | -0.000094 | -0.000044 | -0.000173 | -0.000309 | 0.146279  | 0.135885  | -0.573066 | -0.537292 | -0.538782 | -0.574606 | 0.149438  |
| 206 | 0.000047  | 0.000011  | 0.000053  | -0.000192 | -0.000294 | 0.554076  | 0.238871  | 0.138813  | 0.133078  | -0.551566 | -0.514619 | -0.516181 |
| 207 | -0.000047 | 0.000008  | 0.000001  | 0.000010  | 0.000031  | -0.049672 | -0.079520 | 0.121692  | 0.110951  | -0.062782 | -0.053287 | 0.008065  |
| 208 | 0.000066  | -0.000027 | 0.000011  | -0.000069 | -0.000147 | -0.003625 | 0.008656  | -0.054629 | -0.064930 | 0.118685  | 0.118366  | -0.066593 |
| 209 | 0.000053  | -0.000014 | 0.000001  | -0.000054 | -0.000123 | -0.004945 | -0.005439 | -0.001088 | 0.010381  | -0.056796 | -0.066469 | 0.118782  |
| 210 | 0.000071  | -0.000020 | 0.000003  | -0.000091 | -0.000152 | 0.008530  | -0.003259 | -0.005497 | -0.005466 | 0.000174  | 0.012067  | -0.057183 |
| 211 | -0.000025 | 0.000006  | -0.000013 | 0.000020  | 0.000047  | -0.080603 | -0.050797 | 0.013558  | 0.003002  | -0.004662 | -0.004929 | -0.002733 |
| 212 | 0.000134  | -0.000111 | -0.000066 | -0.000174 | -0.000184 | 0.000263  | 0.000278  | -0.000128 | -0.000046 | -0.000040 | -0.000089 | 0.000051  |
| 213 | 0.000060  | -0.000142 | -0.000084 | 0.000153  | -0.000016 | 0.000473  | 0.000516  | -0.000356 | -0.000214 | 0.000031  | -0.000066 | 0.000113  |
| 214 | -0.000038 | 0.000041  | 0.000032  | 0.000089  | 0.000030  | 0.000113  | -0.000150 | -0.000006 | 0.000006  | -0.000003 | -0.000001 | -0.000007 |
| 215 | 0.000050  | 0.000043  | 0.000029  | -0.000232 | -0.000185 | 0.000046  | 0.000169  | -0.000101 | -0.000074 | 0.000032  | 0.000007  | 0.000021  |
| 216 | 0.000181  | -0.000031 | 0.000028  | -0.000359 | -0.000462 | 0.000339  | 0.000296  | -0.000270 | -0.000082 | -0.000030 | -0.000089 | 0.000105  |
| 217 | -0.000018 | 0.000009  | 0.000045  | 0.000047  | -0.000075 | 0.000711  | 0.000043  | -0.000337 | -0.000258 | 0.000091  | 0.000003  | 0.000013  |
| 218 | -0.000006 | 0.000005  | 0.000013  | -0.000010 | 0.000003  | -0.000083 | -0.000002 | 0.000047  | 0.000030  | 0.000017  | -0.000001 | -0.000028 |
| 219 | 0.000054  | -0.000014 | 0.000015  | -0.000096 | -0.000151 | 0.000142  | 0.000187  | -0.000133 | -0.000065 | 0.000016  | -0.000018 | 0.000058  |
| 220 | 0.000053  | -0.000016 | -0.000003 | -0.000057 | -0.000109 | 0.000126  | 0.000139  | -0.000118 | -0.000054 | 0.000004  | -0.000015 | 0.000045  |
| 221 | 0.000057  | -0.000003 | 0.000005  | -0.000094 | -0.000148 | 0.000160  | 0.000254  | -0.000149 | -0.000066 | -0.000014 | -0.000056 | 0.000059  |
| 222 | -0.000018 | 0.000022  | 0.000016  | -0.000016 | -0.000005 | 0.000039  | 0.000016  | 0.000005  | 0.000019  | -0.000025 | -0.000045 | -0.000021 |
| 223 | 0.000048  | -0.000093 | -0.000076 | -0.000079 | -0.000053 | 0.000481  | -0.000037 | -0.000196 | -0.000096 | 0.000089  | 0.000056  | -0.000019 |
| 224 | 0.000171  | -0.000042 | 0.000042  | -0.000235 | -0.000451 | 0.000346  | 0.000545  | -0.000298 | -0.000219 | -0.000047 | -0.000103 | 0.000155  |

|     |           |           |           |           |           |           |           |           |           |           |           |           |
|-----|-----------|-----------|-----------|-----------|-----------|-----------|-----------|-----------|-----------|-----------|-----------|-----------|
| 225 | 0.000021  | 0.000065  | 0.000038  | -0.000022 | -0.000066 | 0.000281  | -0.000158 | -0.000114 | -0.000151 | 0.000007  | 0.000005  | 0.000048  |
| 226 | 0.000031  | -0.000040 | -0.000054 | -0.000025 | -0.000036 | -0.000221 | 0.000161  | 0.000064  | 0.000113  | 0.000002  | 0.000005  | -0.000040 |
| 227 | 0.000112  | -0.000098 | -0.000042 | -0.000061 | -0.000150 | -0.000176 | 0.000858  | -0.000093 | 0.000054  | -0.000053 | -0.000106 | 0.000048  |
| 228 | 0.000048  | -0.000072 | -0.000021 | -0.000146 | -0.000162 | 0.000596  | -0.000053 | -0.000293 | -0.000289 | 0.000040  | 0.000023  | 0.000099  |
| 229 | -0.000023 | 0.000001  | -0.000034 | 0.000027  | 0.000052  | 0.000119  | -0.000118 | -0.000005 | -0.000029 | 0.000019  | 0.000016  | -0.000018 |
| 230 | 0.000073  | -0.000040 | -0.000028 | -0.000057 | -0.000121 | 0.000220  | 0.000138  | -0.000142 | -0.000078 | 0.000005  | -0.000028 | 0.000042  |
| 231 | 0.000065  | -0.000025 | -0.000012 | -0.000035 | -0.000106 | 0.000184  | 0.000074  | -0.000121 | -0.000074 | 0.000011  | -0.000005 | 0.000038  |
| 232 | 0.000094  | -0.000024 | 0.000026  | -0.000091 | -0.000189 | 0.000146  | 0.000172  | -0.000122 | -0.000072 | 0.000003  | -0.000017 | 0.000047  |
| 233 | -0.000007 | 0.000002  | -0.000006 | 0.000016  | 0.000040  | 0.000040  | -0.000085 | 0.000005  | -0.000022 | 0.000016  | 0.000028  | -0.000015 |
| 234 | 0.018670  | -0.106633 | -0.022102 | -0.309529 | -0.344469 | 0.001508  | 0.000141  | -0.000747 | -0.000467 | 0.000038  | -0.000031 | 0.000218  |
| 235 | 0.022927  | -0.169694 | -0.104803 | -0.312116 | -0.343697 | 0.000608  | 0.001001  | -0.000530 | -0.000373 | 0.000037  | -0.000155 | 0.000212  |
| 236 | -0.169625 | 0.006277  | 0.007846  | -0.103466 | -0.016648 | -0.000540 | -0.000563 | 0.000461  | 0.000229  | 0.000002  | 0.000083  | -0.000185 |
| 237 | -0.104446 | 0.008888  | 0.007916  | -0.166087 | -0.104009 | -0.000670 | -0.000054 | 0.000345  | 0.000235  | -0.000042 | -0.000004 | -0.000086 |
| 238 | -0.285532 | -0.102329 | -0.167234 | 0.009805  | 0.009609  | -0.000073 | 0.000066  | 0.000013  | 0.000029  | -0.000020 | -0.000010 | -0.000004 |
| 239 | -0.314568 | -0.014753 | -0.102337 | 0.011143  | 0.008440  | -0.000210 | -0.000056 | 0.000104  | 0.000086  | -0.000016 | 0.000014  | -0.000038 |
| 240 | 0.559799  | -0.313124 | -0.284713 | -0.105567 | -0.171427 | 0.000180  | 0.000266  | -0.000185 | -0.000085 | 0.000001  | -0.000044 | 0.000084  |
| 241 | 1.066890  | -0.356223 | -0.312861 | -0.018499 | -0.106503 | 0.000155  | 0.000290  | -0.000180 | -0.000073 | -0.000008 | -0.000050 | 0.000087  |
| 242 | -0.356223 | 1.070360  | 0.560746  | -0.304291 | -0.279222 | -0.000075 | -0.000086 | 0.000089  | 0.000041  | -0.000013 | -0.000002 | -0.000029 |
| 243 | -0.312861 | 0.560746  | 1.070620  | -0.345969 | -0.307109 | 0.000037  | 0.000049  | 0.000002  | -0.000010 | -0.000006 | -0.000022 | 0.000004  |
| 244 | -0.018499 | -0.304291 | -0.345969 | 1.075750  | 0.568793  | -0.000379 | -0.000324 | 0.000212  | 0.000159  | 0.000007  | 0.000076  | -0.000082 |
| 245 | -0.106503 | -0.279222 | -0.307109 | 0.568793  | 1.086220  | -0.000539 | -0.000729 | 0.000415  | 0.000228  | 0.000021  | 0.000145  | -0.000182 |
| 246 | 0.000155  | -0.000075 | 0.000037  | -0.000379 | -0.000539 | 1.214890  | 0.456731  | -0.339942 | -0.308907 | -0.105450 | -0.169961 | 0.021359  |
| 247 | 0.000290  | -0.000086 | 0.000049  | -0.000324 | -0.000729 | 0.456731  | 1.204700  | -0.346435 | -0.310938 | -0.021962 | -0.106758 | 0.019166  |
| 248 | -0.000180 | 0.000089  | 0.000002  | 0.000212  | 0.000415  | -0.339942 | -0.346435 | 1.084010  | 0.567768  | -0.306700 | -0.278982 | -0.106084 |
| 249 | -0.000073 | 0.000041  | -0.000010 | 0.000159  | 0.000228  | -0.308907 | -0.310938 | 0.567768  | 1.074580  | -0.345893 | -0.304329 | -0.018050 |
| 250 | -0.000008 | -0.000013 | -0.000006 | 0.000007  | 0.000021  | -0.105450 | -0.021962 | -0.306700 | -0.345893 | 1.070280  | 0.560626  | -0.313145 |
| 251 | -0.000050 | -0.000002 | -0.000022 | 0.000076  | 0.000145  | -0.169961 | -0.106758 | -0.278982 | -0.304329 | 0.560626  | 1.070070  | -0.356667 |
| 252 | 0.000087  | -0.000029 | 0.000004  | -0.000082 | -0.000182 | 0.021359  | 0.019166  | -0.106084 | -0.018050 | -0.313145 | -0.356667 | 1.067290  |
| 253 | 0.000087  | -0.000027 | 0.000008  | -0.000087 | -0.000185 | 0.024080  | 0.016421  | -0.171084 | -0.105283 | -0.285035 | -0.313455 | 0.560003  |
| 254 | -0.000001 | 0.000022  | 0.000013  | 0.000013  | 0.000028  | -0.108742 | -0.166968 | 0.007864  | 0.010653  | -0.102076 | -0.014464 | -0.314244 |
| 255 | 0.000024  | 0.000013  | 0.000026  | -0.000047 | -0.000080 | -0.023800 | -0.102364 | 0.009124  | 0.009403  | -0.166924 | -0.101991 | -0.285397 |
| 256 | -0.000121 | 0.000015  | -0.000049 | 0.000180  | 0.000337  | -0.311197 | -0.305582 | -0.103518 | -0.165829 | 0.008175  | 0.009241  | -0.104297 |
| 257 | -0.000210 | 0.000052  | -0.000050 | 0.000273  | 0.000544  | -0.348945 | -0.336166 | -0.016092 | -0.103235 | 0.008097  | 0.006680  | -0.169918 |
| 258 | 0.000463  | -0.000124 | -0.000001 | -0.000999 | -0.001071 | 0.000670  | 0.000914  | -0.000724 | -0.000354 | 0.000115  | -0.000020 | 0.000219  |
| 259 | -0.000006 | -0.000223 | -0.000086 | 0.000554  | 0.000150  | 0.001098  | 0.000627  | -0.000503 | -0.000316 | -0.000094 | -0.000214 | 0.000218  |
| 260 | -0.000239 | 0.000031  | -0.000059 | 0.000511  | 0.000659  | -0.000654 | -0.000558 | 0.000500  | 0.000245  | -0.000016 | 0.000074  | -0.000188 |
| 261 | -0.000160 | 0.000038  | -0.000019 | 0.000357  | 0.000396  | -0.000309 | -0.000283 | 0.000246  | 0.000136  | -0.000015 | 0.000021  | -0.000101 |
| 262 | 0.000048  | 0.000045  | 0.000047  | -0.000221 | -0.000192 | -0.000010 | 0.000006  | 0.000002  | 0.000011  | 0.000001  | 0.000005  | 0.000011  |
| 263 | 0.000013  | 0.000056  | 0.000038  | -0.000162 | -0.000091 | -0.000110 | -0.000119 | 0.000078  | 0.000042  | 0.000002  | 0.000033  | -0.000015 |
| 264 | 0.000073  | -0.000064 | -0.000027 | -0.000031 | -0.000112 | 0.000183  | 0.000266  | -0.000187 | -0.000095 | 0.000006  | -0.000027 | 0.000081  |
| 265 | 0.000073  | -0.000071 | -0.000038 | -0.000030 | -0.000098 | 0.000166  | 0.000254  | -0.000181 | -0.000091 | 0.000008  | -0.000026 | 0.000078  |
| 266 | -0.000074 | 0.000024  | 0.000005  | 0.000147  | 0.000143  | -0.000079 | -0.000105 | 0.000089  | 0.000044  | -0.000013 | 0.000001  | -0.000039 |
| 267 | -0.000036 | 0.000014  | 0.000014  | 0.000089  | 0.000045  | 0.000081  | 0.000039  | -0.000024 | -0.000017 | -0.000015 | -0.000022 | -0.000002 |
| 268 | -0.000043 | 0.000168  | 0.000108  | -0.000214 | -0.000064 | -0.000489 | -0.000354 | 0.000272  | 0.000170  | 0.000003  | 0.000063  | -0.000084 |
| 269 | -0.000112 | 0.000106  | 0.000019  | -0.000001 | 0.000235  | -0.000548 | -0.000686 | 0.000432  | 0.000224  | 0.000018  | 0.000114  | -0.000178 |
| 270 | 0.000140  | -0.000310 | -0.000154 | -0.000280 | -0.000271 | -0.000648 | 0.001836  | -0.000083 | 0.000289  | -0.000025 | -0.000171 | 0.000002  |
| 271 | 0.000340  | 0.000016  | 0.000214  | -0.000508 | -0.000935 | 0.001639  | 0.000347  | -0.000887 | -0.000800 | -0.000046 | -0.000136 | 0.000397  |
| 272 | -0.000182 | 0.000139  | 0.000036  | 0.000248  | 0.000390  | 0.000264  | -0.001363 | 0.000172  | -0.000059 | 0.000096  | 0.000194  | -0.000113 |
| 273 | -0.000090 | 0.000117  | 0.000058  | 0.000108  | 0.000143  | 0.000281  | -0.000937 | 0.000047  | -0.000102 | 0.000068  | 0.000129  | -0.000037 |
| 274 | 0.000000  | -0.000023 | -0.000043 | 0.000007  | 0.000034  | -0.000149 | 0.000186  | 0.000053  | 0.000091  | -0.000014 | -0.000025 | -0.000025 |

|     |           |           |           |           |           |           |           |           |           |           |           |           |
|-----|-----------|-----------|-----------|-----------|-----------|-----------|-----------|-----------|-----------|-----------|-----------|-----------|
| 275 | -0.000036 | -0.000005 | -0.000049 | 0.000063  | 0.000128  | -0.000403 | 0.000197  | 0.000166  | 0.000177  | -0.000031 | -0.000030 | -0.000056 |
| 276 | 0.000092  | -0.000034 | 0.000017  | -0.000099 | -0.000213 | -0.000216 | 0.000675  | -0.000052 | 0.000022  | -0.000076 | -0.000117 | 0.000074  |
| 277 | 0.000088  | -0.000045 | 0.000006  | -0.000079 | -0.000190 | -0.000168 | 0.000589  | -0.000058 | 0.000019  | -0.000062 | -0.000098 | 0.000063  |
| 278 | -0.000035 | 0.000078  | 0.000063  | -0.000021 | 0.000006  | 0.000441  | -0.000600 | -0.000096 | -0.000162 | 0.000067  | 0.000092  | 0.000003  |
| 279 | 0.000018  | 0.000035  | 0.000075  | -0.000077 | -0.000113 | 0.000571  | -0.000504 | -0.000187 | -0.000218 | 0.000077  | 0.000085  | 0.000032  |
| 280 | -0.000110 | 0.000010  | -0.000094 | 0.000280  | 0.000370  | -0.000600 | -0.000197 | 0.000349  | 0.000303  | -0.000015 | 0.000036  | -0.000139 |
| 281 | -0.000227 | 0.000023  | -0.000128 | 0.000357  | 0.000648  | -0.001010 | -0.000232 | 0.000576  | 0.000439  | -0.000038 | 0.000038  | -0.000203 |
| 282 | 0.000057  | 0.000330  | 0.000033  | -0.002701 | -0.004414 | -0.000763 | 0.000504  | 0.000144  | 0.000329  | 0.000017  | -0.000020 | 0.000006  |
| 283 | 0.000266  | 0.001655  | 0.001146  | -0.003526 | -0.003393 | -0.000195 | 0.000522  | -0.000060 | 0.000011  | 0.000023  | -0.000050 | 0.000041  |
| 284 | -0.000717 | 0.002692  | 0.003255  | -0.000886 | -0.001366 | -0.000020 | -0.000076 | 0.000053  | 0.000012  | -0.000026 | 0.000000  | -0.000019 |
| 285 | -0.000575 | 0.000501  | -0.000468 | 0.001105  | 0.000870  | -0.000037 | -0.000096 | 0.000050  | 0.000021  | -0.000015 | 0.000012  | -0.000023 |
| 286 | 0.000884  | 0.000254  | 0.000432  | 0.000387  | 0.001296  | 0.000031  | -0.000212 | 0.000049  | 0.000011  | -0.000014 | 0.000015  | -0.000026 |
| 287 | 0.000793  | 0.000687  | 0.000874  | 0.001974  | 0.001260  | -0.000038 | -0.000064 | 0.000032  | 0.000014  | -0.000033 | -0.000029 | 0.000000  |
| 288 | 0.000022  | 0.000072  | 0.000030  | -0.000156 | -0.000194 | -0.011070 | 0.022344  | -0.002344 | -0.004210 | 0.000365  | -0.000374 | 0.001768  |
| 289 | 0.000054  | -0.000007 | 0.000001  | -0.000138 | -0.000187 | -0.002346 | -0.000315 | 0.000824  | 0.001451  | 0.000800  | 0.000808  | 0.000484  |
| 290 | -0.000022 | 0.000005  | 0.000002  | 0.000042  | 0.000058  | -0.000636 | -0.002012 | -0.000126 | 0.000997  | -0.000501 | -0.000350 | -0.000572 |
| 291 | -0.000020 | 0.000020  | 0.000016  | 0.000023  | 0.000046  | 0.000508  | -0.003342 | 0.000251  | -0.000333 | 0.000962  | 0.000216  | -0.000154 |
| 292 | -0.000026 | 0.000020  | 0.000013  | 0.000054  | 0.000090  | 0.000927  | -0.000855 | 0.001460  | 0.001290  | -0.003453 | -0.002886 | 0.001092  |
| 293 | 0.000000  | 0.000003  | 0.000001  | 0.000060  | 0.000077  | 0.003961  | -0.001205 | -0.005195 | -0.004677 | 0.000971  | 0.001426  | -0.000024 |
| 294 | -0.000060 | 0.000089  | 0.000070  | 0.000034  | -0.000123 | 0.000124  | -0.000099 | 0.000140  | 0.000008  | -0.000124 | -0.000128 | -0.000020 |
| 295 | -0.000030 | 0.000037  | 0.000015  | 0.000011  | 0.000000  | 0.000176  | 0.000032  | -0.000027 | -0.000047 | -0.000040 | -0.000053 | -0.000002 |
| 296 | -0.000003 | 0.000003  | 0.000000  | 0.000019  | 0.000031  | -0.000052 | -0.000172 | 0.000056  | 0.000025  | 0.000020  | 0.000042  | -0.000016 |
| 297 | -0.000003 | 0.000005  | 0.000003  | -0.000003 | 0.000000  | 0.000014  | -0.000152 | 0.000021  | 0.000002  | 0.000021  | 0.000040  | -0.000017 |
| 298 | 0.000012  | -0.000019 | -0.000004 | -0.000013 | -0.000012 | -0.000085 | -0.000030 | 0.000031  | 0.000031  | 0.000007  | 0.000020  | -0.000011 |
| 299 | -0.000005 | -0.000002 | -0.000009 | 0.000018  | 0.000061  | -0.000100 | -0.000235 | 0.000069  | 0.000062  | 0.000017  | 0.000045  | -0.000027 |
| 300 | -0.000042 | 0.000019  | 0.000052  | 0.000177  | 0.000184  | -0.000174 | 0.000152  | -0.000088 | 0.000021  | -0.000014 | 0.000027  | 0.000086  |
| 301 | -0.000008 | -0.000016 | 0.000019  | 0.000038  | 0.000032  | -0.000200 | 0.000072  | 0.000048  | 0.000059  | -0.000021 | 0.000001  | 0.000004  |
| 302 | -0.000024 | 0.000018  | -0.000010 | 0.000028  | 0.000057  | -0.000025 | -0.000064 | 0.000042  | 0.000016  | -0.000003 | 0.000002  | -0.000015 |
| 303 | -0.000019 | -0.000005 | -0.000018 | 0.000033  | 0.000054  | 0.000002  | 0.000002  | 0.000002  | -0.000003 | 0.000002  | -0.000003 | 0.000002  |
| 304 | -0.000004 | 0.000012  | 0.000005  | -0.000022 | -0.000013 | 0.000003  | 0.000095  | -0.000001 | -0.000009 | -0.000006 | -0.000020 | 0.000002  |
| 305 | -0.000024 | 0.000000  | -0.000017 | 0.000072  | 0.000082  | -0.000043 | -0.000072 | 0.000068  | 0.000023  | -0.000002 | -0.000003 | -0.000032 |
| 306 | -0.001347 | 0.006817  | 0.007763  | 0.008174  | 0.004969  | -0.001335 | 0.001975  | 0.000171  | 0.000249  | -0.000089 | -0.000260 | 0.000031  |
| 307 | 0.000030  | -0.000060 | -0.000486 | -0.001735 | -0.001560 | -0.000353 | 0.000282  | 0.000066  | 0.000144  | -0.000013 | -0.000023 | 0.000009  |
| 308 | 0.000654  | 0.000908  | 0.000768  | -0.001425 | -0.002035 | -0.000095 | 0.000044  | 0.000029  | 0.000040  | 0.000009  | -0.000002 | -0.000008 |
| 309 | -0.000844 | 0.000219  | 0.000191  | -0.000642 | -0.000491 | 0.000028  | -0.000014 | -0.000005 | -0.000009 | 0.000000  | 0.000009  | -0.000002 |
| 310 | -0.001090 | -0.000231 | -0.000651 | 0.002019  | 0.001873  | 0.000029  | -0.000107 | 0.000012  | -0.000004 | -0.000001 | 0.000022  | -0.000008 |
| 311 | 0.000018  | -0.000214 | -0.001264 | 0.002762  | 0.002046  | 0.000082  | 0.000011  | -0.000021 | -0.000028 | -0.000010 | -0.000022 | 0.000009  |
| 312 | 0.000735  | 0.000714  | 0.001168  | -0.000099 | -0.000946 | 0.000303  | -0.000212 | -0.000079 | -0.000142 | 0.000013  | 0.000016  | 0.000001  |
| 313 | 0.000117  | -0.000045 | -0.000067 | -0.000265 | -0.000278 | -0.000789 | -0.042177 | 0.003214  | 0.007859  | 0.006263  | 0.005940  | -0.002464 |
| 314 | 0.000021  | 0.000039  | 0.000025  | -0.000070 | -0.000083 | -0.001810 | 0.005278  | -0.001879 | -0.000172 | 0.001979  | 0.001568  | 0.000831  |
| 315 | 0.000000  | 0.000011  | 0.000002  | -0.000032 | -0.000038 | -0.001202 | 0.003438  | 0.000920  | 0.001586  | -0.002101 | -0.001067 | -0.000552 |
| 316 | -0.000010 | -0.000006 | 0.000001  | 0.000008  | 0.000009  | -0.000565 | 0.002355  | 0.001078  | 0.001165  | -0.000980 | -0.000718 | -0.001553 |
| 317 | -0.000011 | 0.000006  | -0.000005 | 0.000028  | 0.000038  | -0.000401 | -0.002257 | 0.000197  | 0.000084  | -0.000093 | 0.000140  | -0.000109 |
| 318 | 0.000013  | -0.000017 | -0.000002 | -0.000001 | -0.000012 | -0.000662 | -0.006430 | 0.000243  | 0.001013  | 0.000322  | 0.000878  | 0.000498  |
| 319 | -0.000012 | -0.000033 | -0.000021 | 0.000067  | 0.000083  | 0.002560  | -0.001954 | 0.000281  | 0.000141  | -0.001602 | -0.001188 | 0.000405  |
| 320 | -0.000028 | 0.000224  | 0.000173  | -0.000270 | -0.000295 | 0.000418  | -0.000744 | 0.000026  | 0.000004  | -0.000041 | -0.000025 | -0.000009 |
| 321 | -0.000030 | 0.000034  | 0.000018  | 0.000003  | -0.000052 | 0.000329  | -0.000279 | -0.000016 | -0.000073 | -0.000017 | -0.000008 | -0.000006 |
| 322 | -0.000021 | 0.000034  | 0.000019  | 0.000012  | 0.000002  | -0.000041 | -0.000043 | 0.000049  | 0.000011  | -0.000011 | -0.000007 | -0.000014 |
| 323 | 0.000014  | -0.000018 | -0.000002 | 0.000002  | -0.000015 | -0.000080 | 0.000143  | 0.000005  | 0.000019  | -0.000014 | -0.000021 | 0.000009  |
| 324 | 0.000009  | -0.000010 | -0.000006 | -0.000013 | -0.000013 | 0.000022  | -0.000024 | -0.000007 | -0.000004 | 0.000007  | 0.000008  | 0.000002  |

|     |           |           |           |           |           |           |           |           |           |           |           |           |
|-----|-----------|-----------|-----------|-----------|-----------|-----------|-----------|-----------|-----------|-----------|-----------|-----------|
| 325 | -0.000013 | 0.000013  | -0.000006 | 0.000012  | 0.000043  | 0.000138  | -0.000159 | -0.000057 | -0.000056 | 0.000046  | 0.000050  | 0.000006  |
| 326 | 0.000040  | -0.000055 | -0.000025 | -0.000013 | 0.000039  | -0.000367 | 0.000362  | 0.000025  | 0.000102  | -0.000011 | -0.000021 | 0.000002  |
| 327 | -0.000041 | -0.000078 | -0.000007 | 0.000398  | 0.000299  | -0.000270 | 0.000264  | 0.000087  | 0.000064  | -0.000050 | -0.000038 | -0.000010 |
| 328 | -0.000017 | 0.000005  | 0.000016  | 0.000050  | 0.000055  | -0.000076 | 0.000133  | -0.000071 | 0.000001  | 0.000000  | 0.000005  | 0.000051  |
| 329 | -0.000025 | 0.000004  | 0.000001  | 0.000063  | 0.000069  | -0.000058 | -0.000085 | 0.000034  | 0.000025  | -0.000004 | 0.000018  | -0.000007 |
| 330 | 0.000017  | 0.000010  | 0.000014  | -0.000044 | -0.000045 | 0.000012  | 0.000079  | -0.000012 | -0.000011 | -0.000005 | -0.000016 | 0.000009  |
| 331 | 0.000000  | -0.000014 | -0.000022 | 0.000008  | 0.000020  | 0.000082  | -0.000025 | -0.000042 | -0.000024 | 0.000011  | 0.000008  | 0.000007  |
| 332 | -0.000001 | 0.000018  | 0.000005  | -0.000025 | -0.000044 | -0.000006 | -0.000115 | 0.000031  | 0.000013  | 0.000007  | 0.000013  | -0.000018 |
| 333 | 0.000026  | -0.000022 | -0.000013 | -0.000052 | -0.000056 | 0.000051  | 0.000006  | 0.000058  | -0.000007 | -0.000009 | -0.000027 | -0.000042 |

|    | 253       | 254       | 255       | 256       | 257       | 258       | 259       | 260       | 261       | 262       | 263       | 264       |
|----|-----------|-----------|-----------|-----------|-----------|-----------|-----------|-----------|-----------|-----------|-----------|-----------|
| 1  | -0.000513 | 0.000216  | -0.000082 | 0.000842  | 0.001240  | -0.000494 | -0.005166 | 0.001397  | 0.002681  | -0.000663 | -0.000194 | -0.000483 |
| 2  | 0.001540  | -0.001320 | -0.000938 | -0.001247 | -0.003302 | 0.001641  | 0.018770  | -0.005720 | -0.011443 | 0.004161  | 0.001772  | 0.001239  |
| 3  | 0.001259  | -0.000348 | -0.000007 | -0.001888 | -0.002265 | 0.003648  | 0.003046  | -0.002416 | -0.002131 | 0.000173  | -0.000218 | 0.001358  |
| 4  | 0.001181  | -0.000287 | 0.000377  | -0.004051 | -0.003703 | 0.003438  | 0.003148  | -0.002081 | -0.001953 | -0.000049 | -0.000432 | 0.001233  |
| 5  | 0.000908  | 0.000232  | 0.000907  | -0.000745 | 0.000312  | 0.021202  | -0.012871 | -0.004146 | -0.003597 | 0.000123  | -0.000465 | 0.001446  |
| 6  | 0.001270  | -0.000017 | 0.000368  | -0.002208 | -0.002565 | -0.015745 | 0.016998  | 0.000772  | -0.000242 | 0.000717  | 0.000111  | 0.000746  |
| 7  | 0.000136  | 0.000270  | 0.000573  | -0.001330 | -0.000889 | 0.003154  | -0.001571 | -0.000419 | 0.000045  | -0.000474 | -0.000364 | 0.000191  |
| 8  | 0.000195  | 0.000156  | 0.000182  | 0.000048  | -0.000293 | 0.004096  | 0.004044  | -0.002599 | -0.002102 | 0.000331  | -0.000230 | 0.000596  |
| 9  | 0.000613  | -0.000571 | -0.000048 | -0.001898 | -0.002133 | -0.000265 | 0.000174  | 0.000313  | 0.000188  | -0.000265 | -0.000247 | 0.000273  |
| 10 | -0.000713 | 0.000929  | 0.000288  | 0.004205  | 0.005487  | 0.000109  | -0.001341 | -0.000265 | 0.000183  | 0.000153  | 0.000224  | 0.000167  |
| 11 | 0.003515  | -0.001932 | 0.000087  | -0.013479 | -0.015559 | 0.003992  | 0.004488  | -0.002014 | -0.001997 | -0.000162 | -0.000674 | 0.000547  |
| 12 | 0.003125  | -0.001826 | -0.000356 | -0.008353 | -0.006435 | -0.013627 | -0.005838 | 0.005664  | 0.004425  | 0.000313  | 0.001080  | -0.000764 |
| 13 | -0.000764 | 0.001000  | 0.000618  | 0.003053  | 0.003250  | 0.053561  | -0.006503 | -0.016543 | -0.013000 | -0.000037 | -0.001904 | 0.003724  |
| 14 | 0.000565  | -0.000107 | 0.000464  | -0.002175 | -0.002590 | -0.007899 | 0.042180  | -0.005329 | -0.007589 | -0.000714 | -0.001994 | 0.002830  |
| 15 | 0.000183  | -0.000017 | -0.000060 | 0.000097  | 0.000190  | -0.005551 | -0.010913 | 0.003219  | 0.003235  | 0.000554  | 0.000946  | -0.000645 |
| 16 | -0.000114 | -0.000149 | -0.000071 | -0.000103 | -0.000102 | -0.000179 | 0.000606  | 0.000463  | 0.000107  | -0.000305 | -0.000303 | -0.000148 |
| 17 | 0.000130  | -0.000027 | 0.000050  | 0.000049  | -0.000299 | -0.000277 | 0.000391  | -0.000367 | 0.000247  | 0.000109  | -0.000007 | 0.000116  |
| 18 | -0.000143 | 0.000157  | 0.000214  | -0.000279 | -0.000322 | 0.000995  | 0.000421  | -0.000143 | -0.000396 | -0.000053 | -0.000094 | -0.000089 |
| 19 | -0.002026 | 0.001352  | 0.000768  | 0.004290  | 0.005364  | 0.000622  | 0.000498  | -0.000196 | -0.000108 | -0.000010 | -0.000056 | -0.000121 |
| 20 | 0.001124  | -0.000886 | 0.000271  | -0.003514 | -0.004259 | 0.000316  | -0.000175 | -0.000455 | -0.000058 | 0.000053  | 0.000013  | 0.000123  |
| 21 | 0.000631  | -0.001549 | -0.001693 | -0.003248 | -0.004164 | 0.000503  | -0.000111 | -0.000136 | 0.000052  | 0.000057  | 0.000028  | -0.000146 |
| 22 | 0.000155  | -0.000505 | -0.001194 | -0.003488 | -0.000623 | -0.018989 | 0.003001  | 0.005022  | 0.004144  | 0.000764  | 0.001370  | -0.001929 |
| 23 | 0.001036  | -0.000610 | 0.000720  | -0.004603 | -0.004302 | 0.006844  | 0.007837  | -0.004305 | -0.003413 | 0.000295  | -0.000822 | 0.001243  |
| 24 | -0.001771 | -0.000241 | -0.000611 | 0.003437  | 0.003813  | 0.023489  | -0.005770 | -0.004185 | -0.002791 | -0.001752 | -0.001600 | 0.000453  |
| 25 | -0.000159 | -0.000260 | -0.000266 | 0.000002  | 0.000443  | -0.002246 | 0.014475  | -0.000531 | -0.003333 | -0.001238 | -0.000477 | 0.000098  |
| 26 | 0.000080  | 0.000065  | 0.000163  | 0.000123  | -0.000405 | 0.007074  | 0.007926  | -0.004189 | -0.004584 | 0.000662  | -0.000704 | 0.001066  |
| 27 | -0.000132 | -0.000035 | 0.000011  | -0.000504 | -0.000163 | 0.000379  | -0.012453 | 0.004090  | 0.004239  | -0.000919 | -0.000534 | -0.001720 |
| 28 | -0.001104 | 0.000601  | -0.000269 | 0.003858  | 0.004371  | -0.001310 | 0.000217  | 0.000461  | 0.000891  | 0.000043  | 0.000076  | -0.000317 |
| 29 | 0.000298  | -0.000427 | 0.000663  | -0.003179 | -0.004221 | 0.000671  | -0.001345 | 0.000055  | 0.000201  | -0.000240 | -0.000102 | -0.000232 |
| 30 | 0.005752  | 0.003003  | 0.004360  | -0.009132 | -0.006196 | -0.007342 | -0.007265 | 0.004166  | 0.003993  | -0.000323 | 0.000613  | -0.001187 |
| 31 | 0.005127  | 0.002024  | 0.001982  | -0.004880 | 0.000166  | 0.007626  | 0.005148  | -0.004592 | -0.003139 | 0.000643  | -0.000300 | 0.000384  |
| 32 | 0.000166  | -0.000644 | 0.000423  | -0.003328 | -0.002933 | 0.021463  | -0.018962 | -0.006738 | -0.008491 | 0.003853  | 0.002686  | 0.005905  |
| 33 | -0.001172 | 0.000384  | -0.000509 | 0.004088  | 0.004409  | -0.014156 | 0.007641  | 0.000015  | -0.004847 | 0.001788  | 0.001871  | 0.004950  |
| 34 | -0.000303 | 0.000033  | 0.000086  | 0.000685  | 0.000337  | 0.004642  | 0.008489  | -0.002580 | -0.002998 | 0.000252  | -0.000828 | 0.000189  |
| 35 | -0.000278 | -0.000182 | -0.000281 | 0.000349  | 0.000496  | -0.008201 | -0.006578 | 0.004513  | 0.004589  | -0.000613 | 0.000245  | -0.001166 |
| 36 | 0.000041  | 0.000027  | 0.000031  | -0.000089 | -0.000148 | -0.000018 | 0.000258  | -0.000053 | 0.000015  | -0.000013 | -0.000055 | 0.000051  |
| 37 | 0.000059  | -0.000049 | -0.000013 | -0.000030 | -0.000093 | 0.000227  | -0.000029 | -0.000119 | -0.000067 | 0.000009  | 0.000010  | 0.000048  |
| 38 | 0.000170  | -0.000115 | -0.000028 | -0.000236 | -0.000336 | 0.000336  | -0.000094 | -0.000161 | -0.000115 | 0.000030  | 0.000030  | 0.000050  |

|    |           |           |           |           |           |           |           |           |           |           |           |           |
|----|-----------|-----------|-----------|-----------|-----------|-----------|-----------|-----------|-----------|-----------|-----------|-----------|
| 39 | -0.001658 | 0.000203  | 0.000110  | 0.002164  | 0.001933  | 0.000135  | 0.000116  | -0.000118 | -0.000030 | -0.000002 | -0.000031 | 0.000045  |
| 40 | -0.001874 | 0.000198  | 0.000307  | 0.000475  | 0.001072  | 0.000421  | 0.000612  | -0.000339 | -0.000224 | -0.000024 | -0.000102 | 0.000160  |
| 41 | 0.000155  | -0.000051 | 0.000039  | -0.000270 | -0.000406 | -0.007815 | 0.003881  | 0.001941  | 0.002156  | 0.000159  | 0.000252  | -0.001640 |
| 42 | 0.000031  | 0.000011  | 0.000033  | -0.000104 | -0.000142 | 0.002793  | -0.004074 | 0.001045  | 0.000557  | 0.000282  | 0.000142  | -0.001835 |
| 43 | 0.000039  | 0.000009  | 0.000012  | -0.000074 | -0.000116 | 0.000636  | 0.000354  | -0.000412 | -0.000215 | 0.000042  | -0.000075 | 0.000155  |
| 44 | 0.000039  | -0.000012 | 0.000043  | -0.000077 | -0.000116 | 0.000603  | 0.000446  | -0.000328 | -0.000265 | 0.000029  | -0.000035 | 0.000105  |
| 45 | 0.000385  | -0.024753 | -0.015915 | -0.099854 | -0.128761 | 0.000252  | 0.000175  | -0.000117 | 0.000000  | -0.000049 | -0.000048 | 0.000027  |
| 46 | 0.000076  | -0.000073 | -0.000027 | -0.000098 | -0.000072 | 0.267345  | 0.273540  | -0.127235 | -0.099043 | -0.016747 | -0.025211 | 0.000341  |
| 47 | 0.000074  | 0.000068  | 0.000138  | -0.000413 | -0.000475 | 0.000261  | 0.000158  | 0.000001  | -0.000004 | -0.000110 | -0.000124 | 0.000031  |
| 48 | -0.000379 | 0.000446  | 0.000152  | -0.000431 | 0.000521  | -0.003399 | -0.000277 | 0.001261  | 0.000859  | 0.000012  | 0.000155  | -0.000348 |
| 49 | 0.000307  | 0.000045  | 0.000575  | -0.001371 | -0.001025 | 0.000959  | 0.000353  | -0.000601 | -0.000259 | -0.000078 | -0.000132 | 0.000173  |
| 50 | 0.000303  | -0.000293 | -0.000032 | 0.000503  | -0.000465 | -0.001903 | 0.000803  | -0.000172 | -0.000246 | 0.000414  | 0.000322  | -0.000045 |
| 51 | 0.000210  | 0.000124  | 0.000305  | -0.001070 | -0.000760 | 0.001484  | 0.000120  | -0.000539 | -0.000123 | -0.000158 | -0.000203 | 0.000277  |
| 52 | -0.000484 | 0.000304  | -0.000072 | 0.000255  | 0.000941  | -0.001898 | -0.000593 | 0.001106  | 0.000635  | -0.000009 | 0.000112  | -0.000309 |
| 53 | 0.000026  | 0.000161  | 0.000268  | -0.000573 | -0.000349 | -0.001994 | 0.000657  | 0.000274  | 0.000265  | 0.000089  | 0.000058  | -0.000021 |
| 54 | 0.000046  | 0.000037  | 0.000116  | -0.000260 | -0.000239 | 0.000382  | -0.000001 | -0.000131 | -0.000066 | -0.000021 | -0.000033 | 0.000044  |
| 55 | -0.000172 | 0.000161  | 0.000211  | -0.000376 | 0.000174  | 0.000092  | -0.000324 | 0.000254  | 0.000085  | -0.000057 | -0.000011 | -0.000123 |
| 56 | 0.000066  | -0.000048 | 0.000032  | -0.000095 | -0.000128 | 0.000455  | -0.000164 | -0.000194 | -0.000131 | 0.000043  | 0.000028  | 0.000055  |
| 57 | 0.000005  | -0.000024 | -0.000038 | 0.000091  | 0.000035  | -0.000080 | 0.000038  | 0.000012  | 0.000011  | 0.000022  | 0.000022  | -0.000009 |
| 58 | 0.000057  | -0.000038 | -0.000044 | 0.000061  | -0.000087 | -0.000074 | 0.000268  | -0.000066 | 0.000009  | -0.000019 | -0.000042 | 0.000069  |
| 59 | 0.000081  | -0.000024 | 0.000033  | -0.000049 | -0.000214 | -0.000049 | 0.000202  | -0.000072 | -0.000009 | 0.000000  | -0.000017 | 0.000058  |
| 60 | -0.000009 | 0.000013  | 0.000016  | -0.000044 | -0.000085 | -0.000132 | -0.001615 | 0.000202  | 0.001575  | -0.000558 | -0.000450 | 0.000149  |
| 61 | -0.000203 | 0.000113  | -0.000007 | 0.000979  | -0.000830 | 0.007993  | -0.000517 | -0.002066 | -0.001912 | 0.000004  | -0.000144 | 0.000382  |
| 62 | -0.000264 | 0.000438  | 0.000600  | -0.002012 | -0.000401 | -0.008076 | 0.007356  | 0.001283  | -0.001071 | 0.000533  | 0.000144  | 0.000219  |
| 63 | -0.000460 | 0.000543  | 0.000534  | -0.002108 | -0.000421 | -0.008217 | 0.003225  | 0.001975  | 0.001406  | -0.000307 | -0.000297 | 0.000083  |
| 64 | -0.000073 | -0.000022 | 0.000013  | 0.001218  | -0.000406 | 0.003500  | -0.002324 | -0.000709 | 0.002440  | -0.001225 | -0.001008 | 0.000813  |
| 65 | -0.000185 | 0.000430  | -0.000091 | 0.001510  | 0.000235  | 0.004262  | -0.003294 | -0.000583 | 0.000281  | -0.000061 | 0.000049  | 0.000017  |
| 66 | 0.000528  | -0.000607 | -0.000438 | -0.001232 | 0.000721  | -0.009382 | 0.002505  | 0.002298  | 0.000487  | 0.000673  | 0.000684  | -0.000732 |
| 67 | 0.000793  | -0.001111 | -0.000470 | -0.000284 | 0.001106  | -0.004123 | 0.000742  | 0.000667  | 0.000139  | 0.000385  | 0.000398  | -0.000431 |
| 68 | -0.000144 | 0.000206  | -0.000157 | 0.001957  | 0.000044  | 0.014197  | -0.007606 | -0.002969 | -0.001971 | 0.000051  | 0.000199  | -0.000245 |
| 69 | -0.000102 | -0.000205 | -0.000171 | 0.000075  | -0.000749 | -0.002733 | -0.001714 | 0.001609  | 0.001982  | -0.000248 | 0.000031  | -0.001135 |
| 70 | 0.001455  | 0.000645  | 0.000880  | -0.002451 | -0.001150 | 0.003092  | -0.001350 | -0.001090 | 0.000053  | -0.000085 | -0.000058 | -0.000170 |
| 71 | -0.000182 | -0.000420 | -0.000495 | 0.000560  | 0.000297  | 0.001563  | -0.000098 | -0.001064 | -0.002771 | 0.000932  | 0.000595  | 0.001450  |
| 72 | -0.001080 | -0.000118 | -0.000318 | 0.001994  | 0.001794  | -0.001468 | 0.002464  | 0.000490  | 0.000639  | -0.000504 | -0.000448 | -0.000271 |
| 73 | 0.000228  | 0.000040  | 0.000001  | -0.000269 | 0.000023  | 0.003320  | 0.000334  | -0.001462 | -0.001386 | 0.000025  | -0.000020 | 0.000747  |
| 74 | -0.000093 | -0.000071 | 0.000031  | -0.000054 | -0.000226 | -0.000161 | 0.000886  | -0.000026 | 0.000009  | -0.000054 | -0.000133 | -0.000080 |
| 75 | -0.000075 | 0.000043  | 0.000117  | -0.000089 | -0.000268 | 0.000076  | 0.001024  | -0.000138 | -0.000151 | 0.000030  | -0.000091 | -0.000102 |
| 76 | 0.000761  | -0.000362 | -0.000231 | -0.001196 | -0.001025 | 0.000542  | -0.000264 | -0.000124 | -0.000410 | 0.000065  | 0.000074  | 0.000339  |
| 77 | -0.002311 | 0.001281  | 0.000618  | 0.005086  | 0.006354  | 0.000615  | -0.000660 | -0.000013 | -0.000339 | 0.000022  | 0.000056  | 0.000260  |
| 78 | 0.000418  | -0.000063 | 0.000263  | -0.001857 | -0.002176 | 0.000193  | 0.000794  | -0.000280 | -0.000103 | 0.000033  | -0.000067 | -0.000098 |
| 79 | 0.001733  | -0.001081 | -0.000362 | -0.004660 | -0.005700 | 0.000170  | 0.000504  | -0.000263 | -0.000087 | 0.000066  | -0.000001 | -0.000069 |
| 80 | 0.000410  | 0.000823  | -0.000097 | 0.000646  | 0.001734  | 0.001904  | 0.001733  | -0.000589 | -0.000999 | -0.000296 | -0.000404 | 0.000669  |
| 81 | 0.000251  | 0.001895  | 0.001278  | 0.003732  | 0.004348  | -0.022320 | 0.003367  | 0.006499  | 0.004989  | 0.000677  | 0.001340  | -0.002346 |
| 82 | 0.001595  | -0.000750 | -0.000444 | -0.002636 | -0.003043 | 0.004859  | 0.001887  | -0.002341 | -0.001830 | 0.000293  | -0.000014 | 0.000478  |
| 83 | 0.000421  | -0.000539 | -0.000395 | -0.001235 | -0.001175 | 0.016442  | 0.000429  | -0.005772 | -0.004501 | -0.000336 | -0.001043 | 0.001753  |
| 84 | -0.002131 | 0.000663  | 0.000359  | 0.002968  | 0.003452  | 0.014391  | -0.026283 | 0.001616  | 0.001257  | -0.000452 | 0.000529  | 0.000543  |
| 85 | 0.000740  | 0.000005  | 0.000079  | -0.001282 | -0.001334 | -0.026874 | 0.008322  | 0.004724  | 0.004350  | 0.000991  | 0.001793  | 0.000157  |
| 86 | -0.000070 | -0.000142 | -0.000059 | 0.000072  | -0.000008 | 0.001339  | 0.011483  | -0.002797 | -0.002829 | -0.000447 | -0.000749 | 0.001568  |
| 87 | -0.000098 | -0.000078 | 0.000031  | -0.000113 | -0.000145 | 0.001168  | 0.004892  | -0.000872 | -0.001077 | -0.000537 | -0.000673 | 0.000443  |
| 88 | 0.000240  | 0.000285  | 0.000271  | -0.000629 | -0.000325 | 0.001741  | -0.015202 | 0.003240  | 0.003218  | 0.000285  | 0.000616  | -0.001997 |

|     |           |           |           |           |           |           |           |           |           |           |           |           |
|-----|-----------|-----------|-----------|-----------|-----------|-----------|-----------|-----------|-----------|-----------|-----------|-----------|
| 89  | -0.000221 | 0.000226  | 0.000092  | 0.000826  | 0.000832  | -0.000954 | -0.001109 | 0.000660  | 0.000787  | -0.000158 | -0.000006 | -0.000253 |
| 90  | -0.006095 | 0.002337  | -0.000891 | 0.016872  | 0.016757  | -0.001219 | -0.002266 | 0.000776  | 0.000895  | 0.000032  | 0.000209  | -0.000200 |
| 91  | -0.000214 | 0.000047  | -0.000046 | 0.001038  | 0.000876  | -0.029469 | -0.028722 | 0.017024  | 0.016385  | -0.000569 | 0.002551  | -0.006156 |
| 92  | -0.000227 | -0.000026 | -0.000147 | 0.000733  | 0.000704  | -0.003147 | -0.000113 | 0.001075  | 0.001337  | -0.000182 | -0.000078 | -0.000185 |
| 93  | 0.000047  | 0.000033  | -0.000026 | 0.000040  | 0.000128  | 0.000039  | -0.000371 | 0.000017  | 0.000019  | 0.000014  | 0.000049  | 0.000049  |
| 94  | 0.000046  | 0.000038  | -0.000005 | 0.000014  | 0.000098  | 0.000125  | -0.000520 | 0.000009  | -0.000029 | 0.000040  | 0.000085  | 0.000031  |
| 95  | 0.000032  | -0.000037 | -0.000079 | 0.000100  | 0.000192  | -0.000047 | -0.000488 | 0.000074  | 0.000070  | -0.000016 | 0.000044  | 0.000046  |
| 96  | 0.000046  | -0.000009 | -0.000042 | 0.000000  | 0.000083  | -0.000013 | -0.000563 | 0.000067  | 0.000083  | -0.000013 | 0.000048  | 0.000052  |
| 97  | -0.000286 | 0.000084  | -0.000113 | 0.001027  | 0.001215  | -0.000150 | -0.000391 | 0.000162  | 0.000090  | -0.000033 | 0.000021  | 0.000050  |
| 98  | -0.000134 | -0.000021 | -0.000148 | 0.000841  | 0.000969  | -0.000041 | -0.000405 | 0.000120  | 0.000015  | -0.000001 | 0.000045  | 0.000048  |
| 99  | -0.000529 | 0.001467  | 0.001087  | 0.002779  | 0.003852  | -0.000081 | -0.000289 | 0.000138  | 0.000026  | -0.000017 | 0.000022  | 0.000025  |
| 100 | -0.001200 | -0.000398 | -0.000736 | 0.001881  | 0.001839  | -0.000086 | -0.000201 | 0.000127  | 0.000060  | -0.000054 | -0.000026 | 0.000046  |
| 101 | -0.001329 | 0.000465  | 0.000228  | 0.000940  | 0.000707  | -0.002433 | -0.001385 | 0.001308  | 0.001040  | -0.000129 | 0.000071  | -0.000323 |
| 102 | -0.000270 | 0.000249  | 0.000173  | 0.001706  | 0.002350  | -0.002484 | -0.000540 | 0.001079  | 0.000840  | -0.000168 | -0.000057 | -0.000170 |
| 103 | -0.000132 | 0.000224  | 0.000204  | 0.000583  | 0.000438  | -0.012633 | -0.000922 | 0.003902  | 0.002683  | 0.001099  | 0.001468  | -0.000519 |
| 104 | -0.000296 | 0.000315  | 0.000189  | 0.000655  | 0.000739  | -0.003790 | 0.000470  | 0.001869  | 0.001815  | -0.000759 | -0.000420 | -0.001234 |
| 105 | 0.000047  | 0.000053  | 0.000019  | -0.000015 | 0.000006  | 0.000681  | -0.002433 | 0.000577  | 0.001105  | 0.000263  | 0.000504  | -0.001319 |
| 106 | 0.000024  | 0.000086  | 0.000037  | -0.000053 | 0.000005  | -0.002061 | -0.009016 | 0.002228  | 0.001731  | 0.000175  | 0.000237  | -0.000247 |
| 107 | 0.000044  | 0.000046  | -0.000014 | 0.000048  | 0.000063  | -0.000274 | -0.002375 | 0.000239  | 0.000449  | 0.000307  | 0.000318  | -0.000130 |
| 108 | 0.000053  | 0.000035  | -0.000015 | 0.000065  | 0.000081  | -0.000884 | -0.002483 | 0.000641  | 0.000627  | 0.000220  | 0.000345  | -0.000299 |
| 109 | 0.000088  | -0.000243 | -0.000232 | -0.000081 | -0.000037 | -0.000419 | 0.001641  | 0.000175  | -0.000217 | -0.000110 | -0.000200 | 0.000124  |
| 110 | 0.000137  | 0.000007  | 0.000133  | -0.000728 | -0.000782 | 0.001404  | -0.000587 | -0.000841 | -0.000573 | 0.000275  | 0.000213  | 0.000123  |
| 111 | 0.003049  | 0.002648  | 0.006058  | -0.015134 | -0.014607 | 0.000231  | 0.001638  | 0.000002  | -0.000308 | -0.000153 | -0.000222 | 0.000024  |
| 112 | 0.002983  | -0.004680 | -0.004786 | -0.002057 | -0.002415 | 0.000903  | 0.000713  | -0.000742 | -0.000558 | 0.000102  | -0.000006 | 0.000183  |
| 113 | 0.000106  | -0.000078 | -0.000003 | -0.000515 | -0.000358 | 0.028185  | 0.006960  | -0.015670 | -0.014676 | 0.005959  | 0.002567  | 0.003516  |
| 114 | 0.000118  | 0.000022  | 0.000040  | -0.000516 | -0.000515 | 0.001203  | 0.021829  | -0.001502 | -0.001856 | -0.005197 | -0.004972 | 0.002615  |
| 115 | 0.000117  | -0.000124 | -0.000065 | -0.000232 | -0.000040 | 0.001856  | -0.000141 | -0.000411 | -0.000658 | 0.000085  | 0.000009  | 0.000080  |
| 116 | 0.000105  | 0.000155  | 0.000216  | -0.000506 | -0.000668 | 0.001255  | 0.000327  | -0.000641 | -0.000656 | 0.000069  | 0.000044  | 0.000121  |
| 117 | 0.000429  | -0.000469 | 0.000083  | 0.000328  | -0.000434 | 0.003864  | -0.001447 | -0.001216 | -0.000908 | -0.000011 | 0.000010  | -0.000068 |
| 118 | 0.000108  | -0.000219 | -0.000114 | 0.000645  | 0.000048  | -0.002143 | -0.000136 | 0.000234  | -0.000021 | 0.000365  | 0.000372  | -0.000264 |
| 119 | 0.000330  | -0.000325 | 0.000012  | 0.000067  | -0.000457 | -0.000326 | 0.001043  | -0.000614 | -0.000528 | 0.000281  | 0.000146  | 0.000108  |
| 120 | -0.000100 | -0.000054 | -0.000161 | 0.000510  | 0.000411  | -0.001677 | -0.000074 | 0.000442  | 0.000182  | 0.000174  | 0.000198  | -0.000183 |
| 121 | 0.000085  | 0.000033  | 0.000140  | -0.000346 | -0.000359 | 0.001128  | 0.000159  | -0.000333 | -0.000135 | -0.000136 | -0.000157 | 0.000149  |
| 122 | 0.000014  | 0.000021  | 0.000019  | -0.000159 | -0.000049 | 0.000560  | -0.000088 | -0.000111 | -0.000048 | -0.000039 | -0.000041 | 0.000034  |
| 123 | -0.000162 | 0.000048  | -0.000121 | 0.000256  | 0.000467  | -0.001008 | -0.000148 | 0.000346  | 0.000093  | 0.000126  | 0.000157  | -0.000179 |
| 124 | 0.000125  | -0.000073 | 0.000089  | -0.000073 | -0.000304 | 0.000350  | 0.000251  | -0.000198 | -0.000070 | -0.000059 | -0.000078 | 0.000082  |
| 125 | 0.000040  | 0.000023  | 0.000034  | -0.000190 | -0.000168 | 0.000641  | -0.000099 | -0.000144 | -0.000020 | -0.000067 | -0.000079 | 0.000096  |
| 126 | 0.000198  | -0.000298 | -0.000207 | 0.000522  | -0.000074 | 0.000015  | 0.000341  | -0.000441 | -0.000436 | 0.000282  | 0.000188  | 0.000034  |
| 127 | 0.000079  | -0.000216 | -0.000242 | 0.000716  | 0.000146  | -0.000844 | 0.000183  | -0.000059 | -0.000204 | 0.000282  | 0.000240  | -0.000075 |
| 128 | -0.000017 | 0.000005  | -0.000032 | 0.000052  | 0.000081  | -0.000120 | -0.000123 | 0.000059  | 0.000025  | 0.000031  | 0.000034  | -0.000033 |
| 129 | 0.000024  | -0.000016 | 0.000015  | 0.000006  | -0.000067 | 0.000030  | 0.000125  | -0.000037 | -0.000004 | -0.000030 | -0.000032 | 0.000031  |
| 130 | 0.000058  | -0.000006 | 0.000070  | -0.000097 | -0.000193 | -0.000066 | 0.000205  | -0.000024 | 0.000013  | -0.000033 | -0.000038 | 0.000038  |
| 131 | -0.000030 | 0.000023  | -0.000009 | 0.000003  | 0.000056  | 0.000027  | -0.000101 | 0.000011  | -0.000003 | 0.000018  | 0.000022  | -0.000019 |
| 132 | -0.000023 | 0.000000  | -0.000029 | 0.000016  | 0.000082  | -0.000035 | -0.000038 | 0.000027  | 0.000013  | 0.000010  | 0.000011  | -0.000018 |
| 133 | -0.000014 | -0.000005 | -0.000017 | 0.000022  | 0.000048  | 0.000162  | -0.000076 | -0.000034 | -0.000043 | 0.000005  | 0.000006  | -0.000002 |
| 134 | 0.000156  | -0.000097 | -0.000041 | 0.000285  | 0.000252  | -0.000145 | -0.001701 | -0.000012 | 0.000352  | 0.000309  | 0.000259  | -0.000267 |
| 135 | -0.000022 | 0.000068  | 0.000065  | -0.000045 | 0.000033  | 0.001145  | -0.002978 | -0.000480 | -0.000359 | 0.000719  | 0.000656  | -0.000520 |
| 136 | -0.000032 | 0.000048  | 0.000048  | 0.000077  | 0.000146  | 0.000880  | -0.001797 | -0.000285 | -0.000302 | 0.000398  | 0.000382  | -0.000334 |
| 137 | 0.000136  | -0.000099 | -0.000142 | 0.000408  | 0.000277  | 0.000591  | -0.001020 | 0.000112  | 0.000084  | 0.000034  | 0.000040  | -0.000136 |
| 138 | 0.000160  | -0.000199 | -0.000181 | 0.000927  | 0.000653  | 0.000460  | -0.000932 | 0.000132  | 0.000228  | -0.000016 | -0.000014 | -0.000099 |

|     |           |           |           |           |           |           |           |           |           |           |           |           |
|-----|-----------|-----------|-----------|-----------|-----------|-----------|-----------|-----------|-----------|-----------|-----------|-----------|
| 139 | 0.000157  | -0.000426 | 0.000014  | 0.001939  | 0.001308  | 0.000806  | -0.002005 | -0.000185 | 0.000058  | 0.000175  | 0.000251  | -0.000258 |
| 140 | -0.000094 | -0.000089 | 0.000123  | 0.001463  | 0.001164  | 0.000281  | -0.000408 | 0.000143  | 0.000226  | -0.000144 | -0.000098 | -0.000009 |
| 141 | -0.000250 | 0.000097  | 0.000188  | 0.001285  | 0.001011  | 0.000194  | -0.000329 | 0.000171  | 0.000187  | -0.000150 | -0.000085 | 0.000010  |
| 142 | -0.000193 | 0.000610  | 0.000574  | -0.000018 | 0.000411  | -0.000181 | -0.000768 | -0.000123 | 0.000024  | 0.000230  | 0.000241  | -0.000161 |
| 143 | 0.000036  | -0.001832 | -0.002347 | 0.005102  | 0.004541  | 0.001282  | -0.002005 | -0.000535 | -0.000455 | 0.000388  | 0.000401  | -0.000188 |
| 144 | 0.001054  | -0.001552 | -0.001536 | 0.000796  | 0.000828  | 0.006881  | -0.006511 | -0.001501 | -0.002184 | 0.000590  | 0.000898  | -0.000231 |
| 145 | 0.000552  | -0.001472 | -0.002400 | -0.000996 | -0.001072 | 0.006734  | -0.004290 | -0.002107 | -0.002025 | 0.000271  | 0.000278  | 0.000365  |
| 146 | 0.000114  | 0.000958  | 0.001157  | -0.000311 | -0.000418 | 0.001655  | 0.001066  | -0.001284 | -0.001403 | 0.000114  | -0.000017 | 0.000387  |
| 147 | 0.001122  | 0.000057  | 0.000265  | -0.000515 | -0.000273 | -0.002978 | 0.003639  | 0.000214  | 0.000501  | -0.000673 | -0.000779 | -0.000027 |
| 148 | 0.001080  | -0.000727 | -0.000611 | 0.000009  | -0.000326 | 0.003056  | 0.007854  | -0.004245 | -0.005125 | 0.002664  | 0.001803  | -0.000358 |
| 149 | 0.000262  | -0.000234 | -0.000274 | 0.000240  | 0.000049  | 0.003037  | -0.006370 | -0.001382 | -0.000955 | 0.001912  | 0.001728  | -0.001288 |
| 150 | 0.000384  | -0.000499 | -0.000521 | 0.000597  | 0.000468  | -0.011590 | 0.002962  | 0.000779  | 0.001679  | 0.002394  | 0.001535  | -0.000491 |
| 151 | 0.000215  | -0.000266 | -0.000272 | 0.000387  | 0.000337  | -0.003985 | 0.003363  | 0.000777  | 0.000633  | -0.000960 | -0.000762 | 0.000190  |
| 152 | 0.000075  | -0.000097 | -0.000102 | -0.000017 | 0.000044  | -0.000557 | -0.001851 | -0.000450 | 0.000060  | 0.000557  | 0.000521  | -0.000797 |
| 153 | 0.000056  | 0.000005  | -0.000011 | -0.000153 | -0.000110 | 0.002190  | -0.004884 | -0.000954 | -0.000733 | 0.001303  | 0.001184  | -0.001100 |
| 154 | 0.000232  | -0.000462 | -0.000325 | 0.000824  | 0.000691  | 0.001529  | -0.002752 | -0.000308 | -0.000121 | 0.000370  | 0.000395  | -0.000280 |
| 155 | 0.001675  | -0.008664 | -0.010893 | 0.009456  | 0.007896  | 0.002411  | -0.002471 | -0.001014 | -0.000822 | 0.000539  | 0.000551  | -0.000202 |
| 156 | 0.000604  | -0.000558 | -0.000530 | 0.000429  | 0.000162  | -0.004741 | 0.004436  | -0.009336 | -0.009254 | 0.011910  | 0.009012  | -0.001514 |
| 157 | 0.000190  | -0.000160 | -0.000152 | 0.000181  | 0.000143  | 0.001171  | -0.002448 | -0.000753 | -0.000721 | 0.000950  | 0.000844  | -0.000540 |
| 158 | 0.000010  | 0.000120  | 0.000248  | -0.000512 | -0.000368 | -0.001125 | 0.000294  | 0.000241  | 0.000130  | 0.000058  | 0.000057  | -0.000043 |
| 159 | 0.000455  | -0.000173 | 0.000393  | -0.001326 | -0.000883 | -0.002874 | 0.000702  | 0.000613  | 0.000515  | 0.000099  | 0.000138  | -0.000059 |
| 160 | 0.000413  | -0.000224 | 0.000246  | -0.000875 | -0.000729 | -0.002140 | 0.000560  | 0.000481  | 0.000397  | 0.000056  | 0.000083  | -0.000044 |
| 161 | 0.000027  | -0.000007 | 0.000016  | 0.000213  | -0.000136 | 0.000829  | -0.000146 | -0.000156 | -0.000100 | -0.000062 | -0.000062 | 0.000039  |
| 162 | -0.000021 | 0.000039  | 0.000037  | -0.000053 | -0.000046 | -0.000057 | 0.000821  | 0.000026  | -0.000541 | 0.000041  | -0.000009 | 0.000036  |
| 163 | 0.000037  | -0.000052 | -0.000115 | 0.001199  | -0.000197 | 0.005768  | -0.001559 | -0.001229 | -0.000872 | -0.000205 | -0.000198 | 0.000228  |
| 164 | -0.000037 | 0.000027  | 0.000010  | 0.000138  | 0.000245  | 0.001804  | -0.003424 | -0.000536 | -0.000575 | 0.000734  | 0.000697  | -0.000556 |
| 165 | 0.000032  | 0.000011  | -0.000004 | -0.000106 | -0.000124 | -0.000185 | -0.000019 | 0.000108  | 0.000107  | -0.000029 | -0.000023 | -0.000009 |
| 166 | -0.000182 | 0.000160  | 0.000217  | -0.000764 | -0.000551 | -0.001053 | 0.001749  | -0.000124 | -0.000079 | -0.000081 | -0.000088 | 0.000204  |
| 167 | 0.000332  | -0.000251 | 0.000124  | 0.000193  | -0.000287 | 0.000002  | -0.000416 | 0.000288  | 0.000381  | -0.000200 | -0.000108 | -0.000014 |
| 168 | 0.000505  | -0.000514 | -0.000360 | -0.001353 | -0.001204 | -0.000352 | 0.000219  | 0.000028  | 0.000067  | 0.000022  | 0.000009  | -0.000026 |
| 169 | -0.001167 | 0.001830  | 0.001773  | 0.000167  | 0.000137  | 0.000157  | 0.001225  | 0.000203  | -0.000007 | -0.000329 | -0.000360 | 0.000242  |
| 170 | 0.001219  | -0.000007 | 0.000234  | -0.000035 | 0.000481  | -0.000055 | 0.002820  | -0.000294 | -0.000073 | -0.000130 | -0.000343 | 0.000393  |
| 171 | 0.000750  | 0.000595  | 0.000692  | -0.000784 | -0.000483 | -0.002483 | -0.000674 | 0.001435  | 0.001755  | 0.000017  | 0.000116  | -0.000417 |
| 172 | -0.000914 | 0.000406  | 0.000174  | -0.000247 | -0.000219 | 0.003428  | -0.001517 | -0.000544 | 0.000082  | -0.001780 | -0.001716 | 0.001502  |
| 173 | 0.000353  | -0.000475 | -0.000484 | 0.000671  | 0.000606  | -0.003532 | 0.004113  | -0.000035 | 0.000048  | 0.000831  | 0.000647  | 0.000966  |
| 174 | 0.000005  | -0.000009 | -0.000010 | -0.000034 | -0.000022 | -0.001728 | -0.000453 | 0.000207  | 0.000529  | -0.000049 | -0.000144 | -0.000453 |
| 175 | -0.000093 | 0.000117  | 0.000125  | 0.000041  | -0.000054 | -0.002106 | 0.002985  | 0.001037  | 0.000622  | -0.000799 | -0.000813 | 0.000675  |
| 176 | 0.000475  | -0.000388 | -0.000542 | -0.000140 | -0.000366 | -0.002235 | 0.004126  | 0.001199  | 0.001041  | -0.001148 | -0.001092 | 0.000624  |
| 177 | -0.000128 | 0.000492  | 0.000689  | -0.002094 | -0.001450 | 0.000303  | -0.002488 | -0.000927 | -0.000466 | 0.000994  | 0.000911  | -0.000409 |
| 178 | -0.003013 | 0.007919  | 0.009201  | -0.002076 | -0.000541 | -0.001714 | 0.000254  | -0.000435 | -0.000204 | 0.000894  | 0.000685  | -0.000340 |
| 179 | 0.001265  | -0.007003 | -0.008130 | 0.005675  | 0.003210  | -0.001115 | 0.000216  | 0.001582  | 0.001456  | -0.001095 | -0.000851 | 0.000021  |
| 180 | 0.000735  | -0.001205 | -0.001295 | 0.000621  | 0.000590  | 0.029802  | -0.020570 | 0.003666  | 0.003737  | -0.010522 | -0.008399 | 0.002528  |
| 181 | 0.000008  | 0.000038  | 0.000012  | -0.000470 | -0.000206 | -0.023556 | 0.025147  | -0.005726 | -0.006595 | 0.009119  | 0.007325  | -0.000463 |
| 182 | -0.000472 | 0.000478  | 0.000447  | -0.000824 | -0.000514 | 0.003139  | -0.006012 | -0.001205 | -0.001384 | 0.001781  | 0.001494  | -0.001180 |
| 183 | 0.000407  | -0.000385 | -0.000460 | 0.000896  | 0.000440  | 0.000881  | -0.001589 | 0.000496  | 0.000617  | -0.000192 | -0.000192 | -0.000112 |
| 184 | 0.000491  | -0.000417 | -0.000031 | -0.000052 | -0.000536 | -0.000454 | 0.000348  | 0.000163  | 0.000161  | -0.000080 | -0.000053 | 0.000053  |
| 185 | 0.000465  | -0.000301 | 0.000151  | -0.001252 | -0.000379 | -0.003948 | 0.001108  | 0.000815  | 0.000685  | 0.000110  | 0.000156  | -0.000070 |
| 186 | -0.000052 | 0.000050  | 0.000051  | -0.000045 | -0.000078 | 0.000005  | -0.000118 | 0.000010  | -0.000041 | 0.000041  | 0.000032  | -0.000030 |
| 187 | -0.000456 | 0.000364  | -0.000077 | 0.000903  | 0.000423  | 0.002966  | -0.000714 | -0.000644 | -0.000520 | -0.000106 | -0.000140 | 0.000074  |
| 188 | -0.000456 | 0.000304  | -0.000106 | 0.000503  | 0.000586  | 0.001547  | -0.000641 | -0.000374 | -0.000313 | 0.000031  | -0.000001 | -0.000025 |



|     |           |           |           |           |           |           |           |           |           |           |           |           |
|-----|-----------|-----------|-----------|-----------|-----------|-----------|-----------|-----------|-----------|-----------|-----------|-----------|
| 189 | 0.000004  | -0.000013 | 0.000001  | 0.000019  | -0.000006 | 0.000080  | -0.000069 | -0.000020 | -0.000018 | 0.000005  | 0.000011  | 0.000001  |
| 190 | 0.000062  | -0.000124 | -0.000085 | -0.000061 | -0.000158 | 0.000708  | 0.000070  | -0.000246 | -0.000238 | 0.000004  | -0.000017 | 0.000119  |
| 191 | 0.000101  | 0.000003  | 0.000064  | -0.000191 | -0.000334 | 0.001579  | -0.001034 | -0.000698 | -0.000502 | 0.000301  | 0.000248  | 0.000054  |
| 192 | 0.000039  | -0.000040 | -0.000029 | -0.000056 | -0.000083 | -0.000277 | 0.000093  | 0.000020  | 0.000064  | -0.000001 | 0.000005  | -0.000028 |
| 193 | 0.000012  | -0.000014 | -0.000048 | 0.000069  | 0.000021  | -0.000118 | 0.000427  | 0.000047  | 0.000033  | -0.000092 | -0.000086 | 0.000072  |
| 194 | 0.000162  | -0.000061 | -0.000008 | -0.000182 | -0.000366 | 0.000311  | 0.000723  | -0.000201 | -0.000135 | -0.000090 | -0.000132 | 0.000175  |
| 195 | 0.000058  | -0.000208 | -0.000131 | 0.000112  | 0.000028  | -0.000706 | 0.000998  | 0.000015  | 0.000129  | -0.000083 | -0.000119 | 0.000026  |
| 196 | -0.000020 | -0.000013 | -0.000004 | 0.000013  | 0.000020  | 0.000041  | -0.000027 | 0.000007  | -0.000017 | -0.000005 | 0.000005  | -0.000004 |
| 197 | 0.000066  | -0.000005 | 0.000010  | -0.000082 | -0.000161 | 0.000169  | 0.000185  | -0.000126 | -0.000072 | -0.000010 | -0.000024 | 0.000062  |
| 198 | 0.000062  | -0.000007 | 0.000001  | -0.000052 | -0.000113 | 0.000115  | 0.000148  | -0.000102 | -0.000049 | -0.000001 | -0.000016 | 0.000050  |
| 199 | 0.000065  | -0.000031 | -0.000011 | -0.000047 | -0.000124 | 0.000114  | 0.000226  | -0.000134 | -0.000057 | 0.000006  | -0.000023 | 0.000058  |
| 200 | -0.000008 | -0.000054 | -0.000053 | 0.000090  | 0.000097  | -0.000002 | -0.000056 | 0.000006  | -0.000007 | 0.000011  | 0.000025  | -0.000015 |
| 201 | -0.516479 | -0.512532 | -0.549281 | 0.133219  | 0.138683  | 0.000524  | -0.000044 | -0.000192 | -0.000096 | -0.000019 | -0.000024 | 0.000022  |
| 202 | 0.148597  | -0.574649 | -0.538638 | -0.534478 | -0.570181 | 0.000368  | 0.000572  | -0.000368 | -0.000190 | 0.000034  | -0.000039 | 0.000136  |
| 203 | 0.288804  | 0.154397  | 0.151719  | -0.568773 | -0.533776 | -0.000063 | -0.000061 | 0.000031  | 0.000033  | -0.000019 | 0.000008  | 0.000014  |
| 204 | 0.518561  | 0.526227  | 0.298268  | 0.156727  | 0.155121  | 0.000156  | 0.000117  | -0.000142 | -0.000114 | 0.000020  | 0.000016  | 0.000031  |
| 205 | 0.150956  | 0.285957  | 0.515771  | 0.533510  | 0.306101  | 0.000474  | 0.000169  | -0.000283 | -0.000102 | -0.000056 | -0.000076 | 0.000110  |
| 206 | -0.552358 | 0.145557  | 0.146138  | 0.267133  | 0.511091  | -0.000020 | 0.000738  | -0.000202 | -0.000066 | -0.000006 | -0.000075 | 0.000020  |
| 207 | -0.002612 | -0.004681 | -0.004439 | 0.003021  | 0.013262  | -0.000119 | -0.000011 | 0.000044  | 0.000041  | 0.000017  | 0.000018  | -0.000032 |
| 208 | -0.056838 | 0.011908  | 0.000203  | -0.005614 | -0.005592 | 0.000173  | 0.000128  | -0.000150 | -0.000075 | 0.000017  | 0.000004  | 0.000064  |
| 209 | 0.119206  | -0.066262 | -0.056672 | 0.010360  | -0.001053 | 0.000134  | 0.000134  | -0.000121 | -0.000068 | -0.000010 | -0.000003 | 0.000057  |
| 210 | -0.066849 | 0.120153  | 0.118348  | -0.065601 | -0.055418 | 0.000143  | 0.000291  | -0.000149 | -0.000080 | -0.000021 | -0.000054 | 0.000084  |
| 211 | 0.008264  | -0.054569 | -0.063930 | 0.113582  | 0.123804  | -0.000008 | 0.000035  | 0.000007  | 0.000024  | -0.000030 | -0.000039 | -0.000024 |
| 212 | 0.000043  | -0.000005 | 0.000018  | -0.000182 | -0.000166 | 0.237011  | 0.559056  | 0.513800  | 0.262921  | 0.145238  | 0.144326  | -0.550843 |
| 213 | 0.000124  | -0.000051 | 0.000025  | -0.000231 | -0.000365 | 0.137185  | 0.143901  | 0.305634  | 0.533005  | 0.517500  | 0.287231  | 0.150480  |
| 214 | 0.000004  | -0.000003 | -0.000016 | 0.000033  | 0.000031  | -0.564434 | -0.584228 | 0.154328  | 0.156584  | 0.298774  | 0.527189  | 0.517669  |
| 215 | 0.000034  | -0.000014 | -0.000026 | -0.000026 | -0.000067 | -0.582436 | -0.569033 | -0.533904 | -0.567993 | 0.151387  | 0.153962  | 0.288860  |
| 216 | 0.000127  | -0.000038 | 0.000011  | -0.000117 | -0.000251 | 0.135255  | 0.141318  | -0.570920 | -0.534876 | -0.538153 | -0.574198 | 0.149218  |
| 217 | 0.000024  | -0.000092 | -0.000050 | -0.000093 | -0.000055 | 0.549122  | 0.239457  | 0.139178  | 0.133496  | -0.548888 | -0.511913 | -0.517262 |
| 218 | -0.000036 | -0.000008 | -0.000018 | 0.000025  | 0.000059  | -0.048590 | -0.078096 | 0.120743  | 0.108455  | -0.061853 | -0.052429 | 0.007743  |
| 219 | 0.000063  | -0.000025 | -0.000014 | -0.000077 | -0.000135 | -0.002854 | 0.008008  | -0.054909 | -0.065235 | 0.117674  | 0.119068  | -0.066138 |
| 220 | 0.000058  | -0.000005 | 0.000002  | -0.000056 | -0.000124 | -0.005348 | -0.004986 | -0.000986 | 0.010470  | -0.056796 | -0.066437 | 0.118924  |
| 221 | 0.000070  | -0.000007 | 0.000025  | -0.000097 | -0.000179 | 0.009147  | -0.004099 | -0.005730 | -0.005692 | 0.000345  | 0.012221  | -0.057410 |
| 222 | -0.000030 | 0.000028  | 0.000030  | -0.000032 | 0.000014  | -0.083312 | -0.051044 | 0.014196  | 0.003228  | -0.004623 | -0.004852 | -0.002750 |
| 223 | 0.000000  | -0.000038 | 0.000000  | -0.000098 | -0.000140 | 0.000457  | 0.000263  | -0.000225 | -0.000208 | 0.000037  | -0.000019 | 0.000046  |
| 224 | 0.000154  | -0.000021 | 0.000024  | -0.000200 | -0.000335 | 0.000181  | 0.000367  | -0.000205 | -0.000054 | -0.000010 | -0.000057 | 0.000124  |
| 225 | 0.000052  | -0.000040 | -0.000052 | 0.000089  | 0.000035  | -0.000055 | 0.000388  | -0.000096 | -0.000059 | 0.000018  | -0.000006 | 0.000063  |
| 226 | -0.000030 | 0.000055  | 0.000042  | -0.000076 | -0.000075 | 0.000003  | -0.000127 | 0.000044  | 0.000054  | -0.000036 | 0.000002  | -0.000001 |
| 227 | 0.000060  | 0.000075  | 0.000138  | -0.000344 | -0.000458 | 0.000557  | 0.000471  | -0.000382 | -0.000222 | 0.000006  | -0.000083 | 0.000157  |
| 228 | 0.000100  | -0.000098 | -0.000065 | 0.000017  | -0.000077 | 0.000634  | -0.000095 | -0.000227 | -0.000187 | 0.000075  | 0.000021  | 0.000037  |
| 229 | -0.000014 | -0.000010 | -0.000015 | 0.000023  | 0.000033  | -0.000065 | 0.000065  | 0.000068  | 0.000026  | -0.000021 | -0.000032 | -0.000029 |
| 230 | 0.000053  | -0.000014 | 0.000013  | -0.000076 | -0.000132 | 0.000176  | 0.000200  | -0.000141 | -0.000076 | -0.000016 | -0.000036 | 0.000079  |
| 231 | 0.000046  | -0.000020 | -0.000007 | -0.000037 | -0.000090 | 0.000164  | 0.000100  | -0.000124 | -0.000056 | -0.000007 | -0.000001 | 0.000060  |
| 232 | 0.000054  | -0.000012 | -0.000005 | -0.000064 | -0.000129 | 0.000197  | 0.000158  | -0.000149 | -0.000076 | 0.000004  | -0.000015 | 0.000073  |
| 233 | -0.000013 | -0.000014 | -0.000020 | 0.000040  | 0.000039  | -0.000122 | 0.000014  | 0.000059  | 0.000033  | 0.000017  | -0.000002 | -0.000020 |
| 234 | 0.000225  | -0.000082 | 0.000011  | -0.000232 | -0.000577 | -0.000835 | 0.003438  | 0.000045  | 0.000097  | -0.000503 | -0.000635 | 0.000460  |
| 235 | 0.000224  | -0.000132 | 0.000036  | -0.000373 | -0.000561 | 0.002795  | -0.002240 | -0.001341 | -0.000900 | 0.000651  | 0.000534  | -0.000024 |
| 236 | -0.000184 | 0.000040  | -0.000032 | 0.000223  | 0.000463  | -0.000242 | -0.001161 | 0.000287  | 0.000144  | 0.000109  | 0.000193  | -0.000230 |
| 237 | -0.000095 | 0.000066  | 0.000023  | 0.000084  | 0.000196  | 0.000017  | -0.001021 | 0.000092  | 0.000043  | 0.000137  | 0.000192  | -0.000159 |
| 238 | -0.000009 | 0.000018  | 0.000016  | -0.000005 | -0.000018 | -0.000149 | 0.000353  | 0.000075  | 0.000052  | -0.000082 | -0.000082 | 0.000040  |

|     |           |           |           |           |           |           |           |           |           |           |           |           |
|-----|-----------|-----------|-----------|-----------|-----------|-----------|-----------|-----------|-----------|-----------|-----------|-----------|
| 239 | -0.000041 | 0.000030  | -0.000007 | 0.000050  | 0.000086  | -0.000242 | 0.000239  | 0.000156  | 0.000086  | -0.000088 | -0.000067 | 0.000013  |
| 240 | 0.000085  | -0.000013 | 0.000016  | -0.000109 | -0.000197 | 0.000387  | 0.000006  | -0.000217 | -0.000134 | 0.000049  | 0.000012  | 0.000061  |
| 241 | 0.000087  | -0.000001 | 0.000024  | -0.000121 | -0.000210 | 0.000463  | -0.000006 | -0.000239 | -0.000160 | 0.000048  | 0.000013  | 0.000073  |
| 242 | -0.000027 | 0.000022  | 0.000013  | 0.000015  | 0.000052  | -0.000124 | -0.000223 | 0.000031  | 0.000038  | 0.000045  | 0.000056  | -0.000064 |
| 243 | 0.000008  | 0.000013  | 0.000026  | -0.000049 | -0.000050 | -0.000001 | -0.000086 | -0.000059 | -0.000019 | 0.000047  | 0.000038  | -0.000027 |
| 244 | -0.000087 | 0.000013  | -0.000047 | 0.000180  | 0.000273  | -0.000999 | 0.000554  | 0.000511  | 0.000357  | -0.000221 | -0.000162 | -0.000031 |
| 245 | -0.000185 | 0.000028  | -0.000080 | 0.000337  | 0.000544  | -0.001071 | 0.000150  | 0.000659  | 0.000396  | -0.000192 | -0.000091 | -0.000112 |
| 246 | 0.024080  | -0.108742 | -0.023800 | -0.311197 | -0.348945 | 0.000670  | 0.001098  | -0.000654 | -0.000309 | -0.000010 | -0.000110 | 0.000183  |
| 247 | 0.016421  | -0.166968 | -0.102364 | -0.305582 | -0.336166 | 0.000914  | 0.000627  | -0.000558 | -0.000283 | 0.000006  | -0.000119 | 0.000266  |
| 248 | -0.171084 | 0.007864  | 0.009124  | -0.103518 | -0.016092 | -0.000724 | -0.000503 | 0.000500  | 0.000246  | 0.000002  | 0.000078  | -0.000187 |
| 249 | -0.105283 | 0.010653  | 0.009403  | -0.165829 | -0.103235 | -0.000354 | -0.000316 | 0.000245  | 0.000136  | 0.000011  | 0.000042  | -0.000095 |
| 250 | -0.285035 | -0.102076 | -0.166924 | 0.008175  | 0.008097  | 0.000115  | -0.000094 | -0.000016 | -0.000015 | 0.000001  | 0.000002  | 0.000006  |
| 251 | -0.313455 | -0.014464 | -0.101991 | 0.009241  | 0.006680  | -0.000020 | -0.000214 | 0.000074  | 0.000021  | 0.000005  | 0.000033  | -0.000027 |
| 252 | 0.560003  | -0.314244 | -0.285397 | -0.104297 | -0.169918 | 0.000219  | 0.000218  | -0.000188 | -0.000101 | 0.000011  | -0.000015 | 0.000081  |
| 253 | 1.067210  | -0.357405 | -0.313383 | -0.017118 | -0.104917 | 0.000222  | 0.000237  | -0.000205 | -0.000110 | 0.000009  | -0.000017 | 0.000091  |
| 254 | -0.357405 | 1.069610  | 0.560759  | -0.305332 | -0.279636 | -0.000171 | -0.000017 | 0.000091  | 0.000051  | -0.000005 | -0.000001 | -0.000024 |
| 255 | -0.313383 | 0.560759  | 1.068830  | -0.347065 | -0.307165 | -0.000028 | 0.000135  | -0.000007 | 0.000005  | -0.000016 | -0.000029 | 0.000018  |
| 256 | -0.017118 | -0.305332 | -0.347065 | 1.074040  | 0.568539  | -0.000303 | -0.000504 | 0.000254  | 0.000132  | -0.000001 | 0.000058  | -0.000106 |
| 257 | -0.104917 | -0.279636 | -0.307165 | 0.568539  | 1.082820  | -0.000536 | -0.000670 | 0.000462  | 0.000225  | -0.000013 | 0.000078  | -0.000207 |
| 258 | 0.000222  | -0.000171 | -0.000028 | -0.000303 | -0.000536 | 1.201890  | 0.458356  | -0.337120 | -0.304241 | -0.101667 | -0.166899 | 0.017290  |
| 259 | 0.000237  | -0.000017 | 0.000135  | -0.000504 | -0.000670 | 0.458356  | 1.215580  | -0.345453 | -0.312516 | -0.025751 | -0.109746 | 0.023275  |
| 260 | -0.000205 | 0.000091  | -0.000007 | 0.000254  | 0.000462  | -0.337120 | -0.345453 | 1.085350  | 0.565287  | -0.307774 | -0.279767 | -0.104971 |
| 261 | -0.000110 | 0.000051  | 0.000005  | 0.000132  | 0.000225  | -0.304241 | -0.312516 | 0.565287  | 1.072920  | -0.345906 | -0.304102 | -0.016959 |
| 262 | 0.000009  | -0.000005 | -0.000016 | -0.000001 | -0.000013 | -0.101667 | -0.025751 | -0.307774 | -0.345906 | 1.069920  | 0.560564  | -0.313564 |
| 263 | -0.000017 | -0.000001 | -0.000029 | 0.000058  | 0.000078  | -0.166899 | -0.109746 | -0.279767 | -0.304102 | 0.560564  | 1.069370  | -0.357070 |
| 264 | 0.000091  | -0.000024 | 0.000018  | -0.000106 | -0.000207 | 0.017290  | 0.023275  | -0.104971 | -0.016959 | -0.313564 | -0.357070 | 1.067040  |
| 265 | 0.000089  | -0.000030 | 0.000011  | -0.000081 | -0.000194 | 0.019683  | 0.020473  | -0.169924 | -0.104059 | -0.285349 | -0.313770 | 0.559754  |
| 266 | -0.000045 | 0.000032  | 0.000016  | 0.000021  | 0.000077  | -0.106311 | -0.169412 | 0.006858  | 0.009614  | -0.102126 | -0.014485 | -0.313771 |
| 267 | 0.000000  | 0.000009  | 0.000035  | -0.000038 | -0.000045 | -0.020750 | -0.105525 | 0.007915  | 0.008182  | -0.166962 | -0.101985 | -0.285054 |
| 268 | -0.000085 | 0.000018  | -0.000061 | 0.000252  | 0.000297  | -0.310536 | -0.310166 | -0.104190 | -0.165674 | 0.009398  | 0.010286  | -0.105179 |
| 269 | -0.000186 | 0.000047  | -0.000080 | 0.000317  | 0.000525  | -0.349760 | -0.339002 | -0.016209 | -0.102538 | 0.009228  | 0.007612  | -0.170748 |
| 270 | 0.000030  | 0.000184  | 0.000311  | -0.000799 | -0.000927 | 0.001939  | -0.000150 | -0.000721 | -0.000520 | -0.000024 | -0.000133 | 0.000178  |
| 271 | 0.000378  | -0.000198 | -0.000074 | -0.000164 | -0.000453 | 0.000013  | 0.001437  | -0.000517 | -0.000255 | 0.000058  | -0.000082 | 0.000286  |
| 272 | -0.000118 | -0.000117 | -0.000208 | 0.000553  | 0.000700  | -0.000694 | -0.000478 | 0.000457  | 0.000245  | 0.000033  | 0.000115  | -0.000185 |
| 273 | -0.000038 | -0.000108 | -0.000173 | 0.000409  | 0.000461  | -0.000559 | -0.000221 | 0.000277  | 0.000201  | 0.000023  | 0.000063  | -0.000099 |
| 274 | -0.000022 | 0.000049  | 0.000057  | -0.000113 | -0.000090 | 0.000028  | 0.000014  | 0.000009  | 0.000004  | -0.000036 | -0.000024 | -0.000004 |
| 275 | -0.000056 | 0.000080  | 0.000065  | -0.000079 | -0.000033 | -0.000120 | -0.000114 | 0.000104  | 0.000063  | -0.000030 | -0.000001 | -0.000038 |
| 276 | 0.000070  | 0.000060  | 0.000090  | -0.000231 | -0.000299 | 0.000160  | 0.000309  | -0.000191 | -0.000086 | -0.000008 | -0.000045 | 0.000102  |
| 277 | 0.000061  | 0.000052  | 0.000083  | -0.000206 | -0.000275 | 0.000168  | 0.000280  | -0.000173 | -0.000083 | -0.000014 | -0.000045 | 0.000090  |
| 278 | 0.000005  | -0.000096 | -0.000116 | 0.000230  | 0.000233  | -0.000147 | -0.000068 | 0.000080  | 0.000044  | 0.000012  | 0.000034  | -0.000029 |
| 279 | 0.000038  | -0.000116 | -0.000111 | 0.000182  | 0.000151  | 0.000046  | 0.000001  | -0.000035 | -0.000017 | 0.000024  | 0.000012  | 0.000008  |
| 280 | -0.000136 | 0.000081  | 0.000031  | 0.000086  | 0.000199  | -0.000403 | -0.000255 | 0.000280  | 0.000196  | -0.000041 | 0.000006  | -0.000104 |
| 281 | -0.000212 | 0.000129  | 0.000044  | 0.000133  | 0.000335  | -0.000429 | -0.000754 | 0.000431  | 0.000206  | 0.000003  | 0.000100  | -0.000203 |
| 282 | 0.000007  | 0.000137  | 0.000137  | -0.000203 | -0.000300 | 0.000458  | -0.000158 | -0.000237 | -0.000068 | -0.000012 | -0.000002 | 0.000100  |
| 283 | 0.000040  | 0.000030  | 0.000047  | -0.000173 | -0.000237 | 0.000169  | 0.000010  | -0.000102 | -0.000037 | 0.000003  | -0.000012 | 0.000035  |
| 284 | -0.000019 | 0.000004  | -0.000002 | 0.000035  | 0.000059  | 0.000128  | -0.000050 | -0.000040 | -0.000055 | 0.000018  | 0.000016  | 0.000001  |
| 285 | -0.000020 | 0.000010  | 0.000005  | 0.000032  | 0.000059  | 0.000032  | -0.000021 | -0.000003 | -0.000013 | 0.000000  | 0.000005  | 0.000001  |
| 286 | -0.000022 | 0.000006  | -0.000007 | 0.000059  | 0.000110  | -0.000208 | 0.000088  | 0.000090  | 0.000063  | -0.000026 | -0.000017 | -0.000017 |
| 287 | 0.000005  | 0.000017  | 0.000005  | 0.000028  | 0.000064  | -0.000099 | 0.000164  | 0.000023  | 0.000010  | -0.000010 | -0.000023 | -0.000004 |
| 288 | 0.001642  | -0.001776 | -0.001761 | -0.002855 | -0.003712 | -0.000249 | 0.000580  | 0.000213  | 0.000033  | -0.000098 | -0.000090 | -0.000047 |

|     |           |           |           |           |           |           |           |           |           |           |           |           |
|-----|-----------|-----------|-----------|-----------|-----------|-----------|-----------|-----------|-----------|-----------|-----------|-----------|
| 289 | 0.000340  | 0.000112  | -0.000382 | -0.000962 | -0.000387 | -0.000353 | 0.000197  | 0.000158  | 0.000102  | -0.000025 | -0.000023 | -0.000019 |
| 290 | -0.000385 | 0.001413  | 0.001849  | 0.000186  | -0.000260 | 0.000144  | 0.000080  | -0.000120 | -0.000059 | 0.000007  | -0.000014 | 0.000033  |
| 291 | -0.000870 | 0.001068  | 0.000166  | 0.001069  | 0.000894  | 0.000105  | 0.000016  | -0.000066 | -0.000032 | -0.000002 | -0.000009 | 0.000022  |
| 292 | 0.001579  | 0.000775  | 0.001078  | -0.000163 | 0.000629  | 0.000136  | -0.000055 | -0.000074 | -0.000049 | 0.000017  | 0.000006  | 0.000021  |
| 293 | 0.000749  | 0.000724  | 0.001069  | 0.002796  | 0.001721  | 0.000165  | 0.000102  | -0.000153 | -0.000071 | 0.000035  | -0.000010 | 0.000045  |
| 294 | -0.000019 | 0.000001  | 0.000032  | 0.000001  | 0.000086  | 0.021469  | -0.012759 | -0.002912 | -0.001755 | -0.001887 | -0.001463 | 0.001382  |
| 295 | 0.000002  | -0.000005 | 0.000026  | -0.000033 | -0.000029 | 0.002379  | -0.003763 | -0.001860 | -0.002944 | -0.001012 | -0.000786 | -0.000709 |
| 296 | -0.000023 | 0.000003  | -0.000022 | 0.000058  | 0.000082  | -0.000920 | 0.000814  | 0.000821  | 0.000037  | 0.000919  | 0.000599  | 0.001115  |
| 297 | -0.000023 | -0.000011 | -0.000025 | 0.000053  | 0.000076  | -0.003456 | 0.001727  | 0.000798  | 0.001133  | -0.000242 | 0.000564  | -0.000139 |
| 298 | -0.000017 | 0.000010  | 0.000003  | 0.000019  | 0.000022  | -0.001802 | -0.000411 | -0.000763 | -0.000325 | 0.002728  | 0.002091  | -0.000832 |
| 299 | -0.000032 | 0.000008  | -0.000015 | 0.000098  | 0.000107  | -0.000771 | 0.002038  | 0.002254  | 0.002477  | -0.000296 | -0.001001 | -0.000621 |
| 300 | 0.000070  | 0.000047  | 0.000049  | -0.000004 | -0.000176 | -0.000324 | 0.000438  | -0.000057 | 0.000024  | -0.000046 | -0.000027 | 0.000043  |
| 301 | -0.000003 | 0.000034  | 0.000024  | -0.000002 | -0.000016 | -0.000062 | -0.000307 | 0.000090  | 0.000063  | -0.000027 | 0.000038  | -0.000043 |
| 302 | -0.000013 | -0.000001 | -0.000012 | 0.000020  | 0.000052  | 0.000066  | 0.000031  | -0.000043 | -0.000020 | 0.000025  | -0.000004 | 0.000011  |
| 303 | 0.000002  | -0.000004 | -0.000006 | -0.000002 | 0.000007  | 0.000153  | -0.000028 | -0.000081 | -0.000044 | 0.000026  | 0.000005  | 0.000024  |
| 304 | 0.000004  | -0.000001 | 0.000002  | -0.000040 | -0.000027 | 0.000064  | 0.000140  | -0.000058 | -0.000037 | 0.000006  | -0.000018 | 0.000027  |
| 305 | -0.000028 | -0.000003 | -0.000017 | 0.000026  | 0.000084  | 0.000282  | -0.000178 | -0.000064 | -0.000083 | 0.000042  | 0.000038  | -0.000022 |
| 306 | 0.000027  | 0.000190  | 0.000157  | -0.000551 | -0.000563 | 0.000646  | -0.000562 | -0.000194 | -0.000139 | 0.000081  | 0.000050  | 0.000004  |
| 307 | 0.000016  | 0.000084  | 0.000098  | -0.000139 | -0.000173 | 0.000078  | 0.000033  | -0.000066 | 0.000012  | -0.000029 | -0.000022 | 0.000051  |
| 308 | -0.000007 | 0.000003  | 0.000003  | 0.000000  | -0.000017 | 0.000262  | -0.000119 | -0.000114 | -0.000077 | 0.000032  | 0.000024  | 0.000017  |
| 309 | -0.000008 | -0.000001 | -0.000009 | 0.000001  | 0.000010  | -0.000065 | -0.000001 | 0.000046  | 0.000017  | -0.000013 | -0.000004 | -0.000009 |
| 310 | -0.000006 | -0.000011 | -0.000007 | 0.000040  | 0.000042  | -0.000044 | -0.000028 | 0.000019  | 0.000020  | 0.000002  | 0.000008  | -0.000006 |
| 311 | 0.000011  | -0.000008 | 0.000002  | -0.000011 | -0.000015 | 0.000109  | -0.000004 | -0.000046 | -0.000049 | 0.000019  | 0.000007  | 0.000005  |
| 312 | -0.000006 | -0.000067 | -0.000086 | 0.000108  | 0.000152  | -0.000330 | 0.000108  | 0.000156  | 0.000075  | -0.000010 | -0.000011 | -0.000058 |
| 313 | -0.002108 | 0.003577  | 0.005004  | 0.012046  | 0.010953  | -0.000639 | 0.001095  | 0.000078  | 0.000072  | -0.000023 | -0.000148 | 0.000048  |
| 314 | 0.000491  | -0.000887 | -0.001361 | -0.002140 | -0.001656 | -0.000059 | 0.000163  | 0.000088  | 0.000018  | -0.000039 | -0.000028 | -0.000031 |
| 315 | -0.000848 | 0.000910  | 0.000988  | -0.001110 | -0.001404 | -0.000049 | 0.000188  | 0.000005  | 0.000014  | -0.000026 | -0.000035 | 0.000011  |
| 316 | -0.001478 | 0.000993  | 0.001136  | -0.001192 | -0.000833 | -0.000007 | -0.000064 | 0.000015  | -0.000012 | 0.000005  | 0.000013  | 0.000001  |
| 317 | -0.000203 | 0.000578  | 0.000106  | 0.000705  | 0.000585  | 0.000075  | -0.000068 | -0.000024 | -0.000014 | 0.000006  | 0.000011  | -0.000013 |
| 318 | 0.000929  | -0.000502 | -0.001110 | 0.002799  | 0.002322  | 0.000021  | -0.000018 | -0.000014 | 0.000017  | -0.000008 | -0.000006 | 0.000004  |
| 319 | 0.000460  | 0.001573  | 0.002016  | -0.000548 | -0.001008 | 0.000018  | -0.000200 | -0.000069 | -0.000022 | 0.000062  | 0.000044  | 0.000029  |
| 320 | 0.000004  | -0.000021 | 0.000027  | 0.000203  | 0.000151  | 0.044853  | 0.009065  | -0.011220 | -0.013757 | -0.004515 | -0.004007 | 0.001536  |
| 321 | -0.000008 | -0.000040 | -0.000025 | 0.000047  | 0.000095  | 0.001105  | -0.002199 | 0.001419  | -0.000109 | -0.001882 | -0.001389 | -0.000235 |
| 322 | -0.000014 | -0.000001 | -0.000007 | 0.000031  | 0.000048  | 0.005484  | -0.000413 | -0.002150 | -0.002447 | 0.001370  | 0.000385  | -0.000566 |
| 323 | 0.000008  | 0.000019  | 0.000026  | -0.000050 | -0.000065 | 0.002667  | -0.000386 | -0.001050 | -0.001246 | 0.000082  | -0.000210 | 0.000463  |
| 324 | 0.000002  | -0.000005 | -0.000012 | -0.000003 | 0.000015  | -0.002337 | 0.001655  | 0.000683  | 0.000938  | -0.000917 | -0.000862 | 0.001634  |
| 325 | 0.000009  | -0.000034 | -0.000042 | 0.000059  | 0.000040  | -0.003279 | 0.002258  | 0.001487  | 0.001122  | -0.000830 | -0.000996 | 0.000421  |
| 326 | 0.000004  | 0.000060  | 0.000059  | -0.000084 | -0.000133 | -0.003522 | 0.000995  | 0.001159  | 0.001733  | 0.001376  | 0.000844  | -0.000860 |
| 327 | -0.000012 | 0.000053  | 0.000041  | -0.000079 | -0.000045 | 0.000978  | -0.001854 | -0.000102 | -0.000097 | 0.000118  | 0.000228  | -0.000143 |
| 328 | 0.000045  | 0.000014  | 0.000028  | -0.000023 | -0.000108 | -0.000129 | 0.000163  | -0.000032 | 0.000027  | -0.000029 | -0.000014 | 0.000021  |
| 329 | -0.000010 | 0.000013  | -0.000004 | 0.000039  | 0.000037  | -0.000015 | 0.000020  | -0.000021 | -0.000008 | 0.000011  | 0.000010  | 0.000005  |
| 330 | 0.000009  | -0.000001 | 0.000003  | -0.000035 | -0.000031 | -0.000079 | 0.000081  | 0.000024  | 0.000018  | -0.000011 | -0.000020 | 0.000007  |
| 331 | 0.000008  | -0.000011 | 0.000001  | 0.000006  | -0.000022 | 0.000099  | -0.000003 | -0.000047 | -0.000026 | 0.000009  | -0.000002 | 0.000014  |
| 332 | -0.000017 | -0.000006 | -0.000019 | 0.000039  | 0.000077  | -0.000149 | 0.000039  | 0.000059  | 0.000043  | -0.000004 | -0.000001 | -0.000018 |
| 333 | -0.000036 | -0.000010 | -0.000011 | -0.000025 | 0.000051  | 0.000270  | -0.000300 | 0.000018  | -0.000054 | 0.000025  | 0.000028  | -0.000029 |

|   | 265       | 266       | 267       | 268       | 269       | 270       | 271       | 272       | 273       | 274       | 275       | 276       |
|---|-----------|-----------|-----------|-----------|-----------|-----------|-----------|-----------|-----------|-----------|-----------|-----------|
| 1 | -0.000649 | 0.000507  | 0.000282  | 0.001129  | 0.001650  | -0.001805 | -0.001395 | 0.001225  | 0.000838  | -0.000111 | 0.000173  | -0.000508 |
| 2 | 0.002088  | -0.002482 | -0.002049 | -0.002699 | -0.005257 | 0.007301  | 0.002254  | -0.002916 | -0.001118 | -0.000979 | -0.001342 | 0.001517  |

|    |           |           |           |           |           |           |           |           |           |           |           |           |
|----|-----------|-----------|-----------|-----------|-----------|-----------|-----------|-----------|-----------|-----------|-----------|-----------|
| 3  | 0.001372  | -0.000225 | 0.000081  | -0.002226 | -0.002466 | 0.024532  | -0.015484 | -0.005556 | -0.004854 | 0.001231  | 0.000896  | 0.002197  |
| 4  | 0.001253  | -0.000196 | 0.000089  | -0.002105 | -0.002346 | 0.003875  | 0.002672  | -0.001969 | -0.001795 | -0.000249 | -0.000645 | 0.001148  |
| 5  | 0.001446  | 0.000726  | 0.001356  | -0.003498 | -0.001859 | 0.004912  | 0.002041  | -0.003072 | -0.002713 | 0.000612  | 0.000292  | 0.001439  |
| 6  | 0.000565  | -0.000405 | 0.000280  | -0.002329 | -0.001330 | -0.019112 | 0.019976  | 0.002161  | 0.000053  | 0.000064  | -0.000939 | -0.000190 |
| 7  | 0.000061  | 0.000146  | 0.000383  | -0.001072 | -0.000081 | -0.000105 | 0.001485  | -0.000934 | -0.000649 | 0.000639  | 0.000301  | -0.000017 |
| 8  | 0.000620  | -0.000341 | 0.000149  | -0.002136 | -0.002435 | 0.057760  | -0.008159 | -0.018442 | -0.015522 | 0.001523  | -0.000116 | 0.004984  |
| 9  | 0.000252  | 0.000034  | 0.000026  | -0.000175 | -0.000306 | -0.013648 | -0.005167 | 0.005622  | 0.004478  | 0.000166  | 0.000889  | -0.000775 |
| 10 | 0.000189  | -0.000012 | -0.000098 | 0.000454  | 0.000238  | 0.003101  | 0.004681  | -0.001553 | -0.001563 | -0.000367 | -0.000960 | 0.000395  |
| 11 | 0.000492  | -0.000190 | 0.000399  | -0.002354 | -0.002530 | 0.000628  | -0.001285 | -0.000758 | -0.000343 | 0.000446  | 0.000546  | 0.000327  |
| 12 | -0.000777 | 0.001200  | 0.000970  | 0.003647  | 0.003747  | -0.000861 | 0.000173  | 0.000485  | 0.000430  | -0.000250 | -0.000291 | 0.000035  |
| 13 | 0.003635  | -0.001517 | -0.000284 | -0.012053 | -0.009311 | 0.004610  | 0.003695  | -0.003047 | -0.002539 | 0.000767  | 0.000184  | 0.000692  |
| 14 | 0.002718  | -0.001964 | -0.000035 | -0.010300 | -0.011709 | -0.005559 | -0.011245 | 0.003133  | 0.003094  | 0.000793  | 0.001071  | -0.000638 |
| 15 | -0.000708 | 0.000842  | 0.000207  | 0.003621  | 0.005186  | -0.011432 | 0.046385  | -0.003483 | -0.007069 | -0.001988 | -0.003748 | 0.001422  |
| 16 | -0.000170 | 0.000145  | 0.000155  | -0.000184 | -0.000186 | 0.030093  | -0.007951 | -0.005792 | -0.004850 | -0.001421 | -0.001302 | 0.000837  |
| 17 | 0.000110  | -0.000109 | -0.000060 | 0.000109  | -0.000260 | 0.006912  | 0.008078  | -0.004525 | -0.003644 | 0.000351  | -0.000660 | 0.001585  |
| 18 | -0.000108 | -0.000086 | -0.000001 | -0.000286 | -0.000167 | -0.022226 | 0.004867  | 0.005656  | 0.004878  | 0.000639  | 0.001216  | -0.002195 |
| 19 | -0.000150 | -0.000034 | 0.000017  | -0.000446 | -0.000013 | -0.000003 | 0.000815  | -0.000136 | -0.000056 | 0.000035  | 0.000014  | -0.000052 |
| 20 | 0.000108  | -0.000060 | 0.000050  | 0.000372  | -0.000284 | -0.000237 | 0.000084  | -0.000360 | 0.000047  | 0.000062  | 0.000034  | 0.000170  |
| 21 | -0.000143 | -0.000116 | -0.000081 | -0.000179 | 0.000268  | 0.000377  | 0.001038  | -0.000139 | -0.000241 | 0.000000  | -0.000100 | -0.000146 |
| 22 | -0.001839 | -0.000509 | -0.000818 | 0.005491  | 0.004384  | 0.000841  | 0.000391  | -0.000069 | -0.000444 | -0.000014 | -0.000032 | -0.000168 |
| 23 | 0.001029  | -0.000272 | 0.001132  | -0.005141 | -0.004422 | -0.000389 | 0.000229  | -0.000297 | 0.000397  | 0.000126  | -0.000018 | 0.000040  |
| 24 | 0.000275  | -0.000012 | -0.000759 | -0.005237 | -0.002216 | -0.000091 | 0.000682  | 0.000412  | -0.000057 | -0.000259 | -0.000288 | -0.000159 |
| 25 | 0.000200  | -0.001112 | -0.001248 | -0.001820 | -0.002679 | 0.002042  | -0.014973 | 0.004051  | 0.004529  | -0.000721 | -0.000373 | -0.001818 |
| 26 | 0.001200  | -0.000941 | 0.000236  | -0.003684 | -0.004076 | 0.007061  | 0.007534  | -0.003927 | -0.004354 | 0.000482  | -0.000901 | 0.000964  |
| 27 | -0.001790 | 0.000993  | 0.000361  | 0.003192  | 0.004097  | -0.003326 | 0.017115  | -0.001131 | -0.004050 | -0.001241 | -0.000510 | 0.000067  |
| 28 | -0.000345 | -0.000213 | -0.000287 | 0.000219  | 0.000567  | 0.006587  | 0.006946  | -0.004791 | -0.003597 | 0.000738  | -0.000071 | 0.000871  |
| 29 | -0.000321 | 0.000121  | 0.000127  | 0.000724  | 0.000343  | -0.008423 | -0.006299 | 0.004194  | 0.003857  | -0.000069 | 0.000771  | -0.001177 |
| 30 | -0.001146 | 0.000438  | -0.000373 | 0.004163  | 0.004271  | -0.000322 | -0.000692 | 0.000290  | 0.000136  | -0.000113 | 0.000005  | -0.000256 |
| 31 | 0.000256  | -0.000458 | 0.000682  | -0.003241 | -0.003007 | -0.001933 | 0.000657  | 0.000733  | 0.001054  | 0.000063  | -0.000041 | -0.000572 |
| 32 | 0.005629  | 0.002219  | 0.002150  | -0.008182 | -0.001647 | -0.007928 | -0.007165 | 0.004470  | 0.004581  | -0.000402 | 0.000335  | -0.001391 |
| 33 | 0.005113  | 0.003222  | 0.004747  | -0.006602 | -0.003608 | 0.004355  | 0.008525  | -0.002035 | -0.002700 | -0.000112 | -0.001253 | -0.000018 |
| 34 | 0.000247  | -0.000628 | 0.000332  | -0.003210 | -0.003913 | -0.015960 | 0.009681  | 0.001027  | -0.005199 | 0.001026  | 0.001100  | 0.004570  |
| 35 | -0.001207 | 0.000696  | -0.000227 | 0.003771  | 0.004182  | 0.024685  | -0.017729 | -0.008473 | -0.011543 | 0.005326  | 0.004060  | 0.006770  |
| 36 | 0.000046  | 0.000003  | 0.000007  | -0.000091 | -0.000149 | -0.005558 | 0.002817  | 0.001548  | 0.001845  | -0.000012 | 0.000109  | -0.001661 |
| 37 | 0.000042  | -0.000037 | -0.000030 | -0.000019 | -0.000036 | 0.000466  | 0.000647  | -0.000348 | -0.000260 | -0.000037 | -0.000106 | 0.000183  |
| 38 | 0.000044  | -0.000052 | -0.000041 | -0.000007 | -0.000018 | 0.000090  | 0.000224  | -0.000107 | -0.000042 | -0.000024 | -0.000049 | 0.000062  |
| 39 | 0.000041  | -0.000007 | 0.000035  | -0.000066 | -0.000119 | -0.000011 | 0.000223  | -0.000056 | -0.000031 | -0.000016 | -0.000027 | 0.000042  |
| 40 | 0.000166  | -0.000064 | 0.000065  | -0.000246 | -0.000425 | -0.000024 | 0.000190  | -0.000040 | -0.000021 | -0.000014 | -0.000014 | 0.000026  |
| 41 | -0.001805 | 0.000591  | 0.000774  | 0.001020  | 0.000520  | 0.000072  | 0.000140  | -0.000097 | -0.000008 | 0.000015  | -0.000016 | 0.000033  |
| 42 | -0.001713 | 0.000104  | 0.000038  | 0.001296  | 0.001320  | 0.000513  | 0.000478  | -0.000389 | -0.000192 | 0.000040  | -0.000080 | 0.000143  |
| 43 | 0.000167  | -0.000097 | -0.000042 | -0.000206 | -0.000306 | 0.003348  | -0.005531 | 0.000592  | 0.001027  | 0.000445  | 0.000260  | -0.001711 |
| 44 | 0.000087  | -0.000060 | -0.000026 | -0.000267 | -0.000289 | 0.000393  | 0.000116  | -0.000143 | -0.000035 | -0.000049 | -0.000071 | 0.000042  |
| 45 | 0.000007  | -0.000038 | 0.000010  | -0.000102 | -0.000117 | 0.001205  | -0.000055 | -0.000555 | -0.000483 | 0.000152  | 0.000096  | 0.000119  |
| 46 | 0.000059  | -0.025587 | -0.016738 | -0.102056 | -0.128756 | 0.000722  | -0.000267 | -0.000167 | -0.000155 | 0.000037  | -0.000027 | 0.000029  |
| 47 | 0.000019  | 0.000020  | 0.000070  | -0.000149 | -0.000174 | 0.267794  | 0.276144  | -0.127011 | -0.101235 | -0.016845 | -0.025629 | 0.000098  |
| 48 | -0.000258 | 0.000004  | -0.000384 | 0.001395  | 0.000984  | -0.001162 | 0.000166  | 0.000637  | 0.000347  | -0.000060 | -0.000002 | -0.000338 |
| 49 | 0.000159  | -0.000018 | 0.000338  | -0.000125 | -0.000765 | 0.000260  | 0.002010  | -0.000850 | -0.001243 | 0.000458  | 0.000214  | 0.000260  |
| 50 | 0.000132  | -0.000407 | -0.000438 | 0.001677  | -0.000136 | 0.000994  | 0.001556  | -0.001340 | -0.001067 | 0.000434  | 0.000078  | 0.000530  |
| 51 | 0.000201  | 0.000043  | 0.000146  | -0.000801 | -0.000447 | 0.001484  | 0.002546  | -0.001530 | -0.001776 | 0.000766  | 0.000237  | 0.000292  |
| 52 | -0.000347 | 0.000061  | -0.000237 | 0.000479  | 0.000999  | -0.002226 | -0.000405 | 0.001459  | 0.000289  | -0.000046 | 0.000311  | -0.000724 |

|     |           |           |           |           |           |           |           |           |           |           |           |           |
|-----|-----------|-----------|-----------|-----------|-----------|-----------|-----------|-----------|-----------|-----------|-----------|-----------|
| 53  | 0.000049  | -0.000054 | -0.000009 | 0.001044  | -0.000352 | 0.000056  | 0.000366  | -0.000163 | -0.000133 | 0.000071  | -0.000002 | 0.000041  |
| 54  | 0.000026  | 0.000014  | 0.000066  | -0.000148 | -0.000131 | 0.000114  | 0.000256  | -0.000194 | -0.000133 | 0.000090  | 0.000019  | 0.000046  |
| 55  | -0.000199 | 0.000126  | 0.000162  | -0.000176 | 0.000172  | -0.000578 | 0.000547  | 0.000201  | -0.000665 | 0.000299  | 0.000357  | -0.000304 |
| 56  | 0.000052  | -0.000070 | -0.000032 | 0.000019  | -0.000061 | 0.000557  | 0.000143  | -0.000509 | -0.000469 | 0.000296  | 0.000188  | 0.000070  |
| 57  | -0.000009 | -0.000028 | -0.000044 | 0.000096  | 0.000045  | 0.000113  | 0.000184  | -0.000125 | -0.000086 | 0.000055  | 0.000006  | 0.000042  |
| 58  | 0.000056  | -0.000019 | 0.000011  | -0.000031 | -0.000160 | 0.000363  | 0.000352  | -0.000377 | -0.000179 | 0.000131  | -0.000009 | 0.000112  |
| 59  | 0.000051  | -0.000023 | -0.000011 | 0.000000  | -0.000129 | 0.000017  | -0.000084 | 0.000016  | 0.000156  | -0.000108 | -0.000077 | 0.000045  |
| 60  | -0.000009 | 0.000195  | 0.000103  | 0.000149  | 0.000392  | 0.000116  | 0.000101  | -0.000023 | -0.000004 | -0.000023 | -0.000034 | -0.000009 |
| 61  | 0.000225  | 0.000025  | 0.000375  | -0.004201 | -0.000121 | 0.001514  | -0.002697 | -0.000703 | 0.000260  | -0.000588 | 0.000052  | 0.001081  |
| 62  | 0.000707  | -0.000365 | -0.000550 | 0.001996  | -0.002207 | 0.001408  | 0.002894  | -0.001169 | -0.001561 | 0.000478  | 0.000109  | 0.000261  |
| 63  | 0.000388  | -0.000171 | -0.000593 | 0.002817  | -0.000335 | 0.000933  | 0.003569  | -0.001899 | -0.002248 | 0.001004  | 0.000446  | 0.000856  |
| 64  | 0.000367  | 0.000646  | 0.000728  | -0.003316 | 0.000114  | 0.002102  | -0.004011 | 0.000070  | 0.000847  | -0.000903 | -0.000124 | 0.000363  |
| 65  | -0.000272 | 0.000284  | 0.000296  | -0.001733 | 0.000788  | -0.002872 | -0.001928 | 0.003206  | 0.003498  | -0.001508 | -0.001223 | -0.001402 |
| 66  | -0.000315 | -0.000436 | -0.000907 | 0.005094  | -0.000005 | -0.000050 | -0.001577 | 0.000121  | -0.000075 | 0.000493  | 0.000561  | -0.000445 |
| 67  | -0.000281 | -0.000132 | -0.000065 | 0.003065  | -0.000415 | 0.000510  | 0.001071  | -0.000637 | -0.001594 | 0.001101  | 0.000725  | -0.000487 |
| 68  | -0.000706 | 0.000163  | 0.000747  | -0.003883 | 0.002061  | -0.003685 | 0.002711  | 0.001106  | 0.000946  | -0.000118 | -0.000586 | -0.000255 |
| 69  | -0.001188 | 0.000037  | -0.000151 | 0.001823  | 0.001691  | 0.001901  | 0.000331  | -0.000996 | -0.000270 | 0.000094  | 0.000100  | -0.000013 |
| 70  | -0.000226 | -0.000242 | -0.000286 | 0.000232  | 0.000125  | -0.003943 | -0.000807 | 0.001907  | 0.002212  | -0.000215 | -0.000070 | -0.001243 |
| 71  | 0.001509  | 0.000418  | 0.000675  | -0.002128 | -0.001081 | -0.001563 | 0.001710  | 0.001008  | 0.001245  | -0.000742 | -0.000762 | -0.000669 |
| 72  | -0.000237 | -0.000223 | -0.000231 | 0.000304  | -0.000514 | 0.003049  | -0.001207 | -0.001573 | -0.002934 | 0.000860  | 0.000684  | 0.001689  |
| 73  | 0.000766  | -0.000072 | 0.000027  | -0.001213 | -0.001068 | 0.017897  | -0.029227 | 0.000451  | 0.000002  | 0.000538  | 0.001656  | 0.001018  |
| 74  | -0.000090 | -0.000006 | 0.000081  | -0.000131 | -0.000294 | 0.017687  | 0.000406  | -0.006234 | -0.005243 | -0.000084 | -0.000751 | 0.002105  |
| 75  | -0.000095 | -0.000066 | 0.000034  | -0.000186 | -0.000336 | 0.004750  | 0.002191  | -0.002487 | -0.002063 | 0.000478  | 0.000188  | 0.000601  |
| 76  | 0.000351  | 0.000008  | -0.000031 | -0.000465 | -0.000088 | -0.023903 | 0.003423  | 0.007245  | 0.005930  | 0.000277  | 0.000847  | -0.002917 |
| 77  | 0.000276  | 0.000100  | 0.000079  | -0.000387 | -0.000007 | 0.002750  | 0.001472  | -0.000663 | -0.001045 | -0.000440 | -0.000612 | 0.000553  |
| 78  | -0.000111 | -0.000001 | 0.000103  | -0.000190 | -0.000272 | -0.000022 | 0.000482  | -0.000281 | -0.000058 | 0.000140  | 0.000077  | -0.000050 |
| 79  | -0.000074 | -0.000063 | 0.000005  | -0.000035 | -0.000153 | 0.000219  | 0.000636  | -0.000324 | -0.000120 | 0.000098  | -0.000004 | -0.000076 |
| 80  | 0.000682  | -0.000055 | -0.000003 | -0.001376 | -0.001274 | 0.000757  | -0.000814 | -0.000045 | -0.000478 | 0.000023  | 0.000076  | 0.000234  |
| 81  | -0.002303 | 0.000452  | 0.000222  | 0.005007  | 0.004512  | 0.000684  | -0.000515 | -0.000283 | -0.000583 | 0.000182  | 0.000266  | 0.000318  |
| 82  | 0.000481  | -0.000640 | -0.000528 | -0.001283 | -0.001371 | 0.000089  | 0.000699  | -0.000074 | 0.000022  | 0.000017  | -0.000126 | -0.000162 |
| 83  | 0.001695  | -0.000786 | -0.000499 | -0.003992 | -0.003452 | -0.000221 | 0.000705  | 0.000065  | 0.000177  | -0.000091 | -0.000209 | -0.000121 |
| 84  | 0.000794  | 0.002173  | 0.001325  | 0.001500  | 0.002442  | 0.003417  | 0.000950  | -0.001936 | -0.002004 | 0.000379  | 0.000341  | 0.000946  |
| 85  | -0.000127 | 0.000889  | -0.000064 | 0.002212  | 0.003799  | 0.002665  | -0.016995 | 0.003069  | 0.003395  | 0.000670  | 0.001032  | -0.001776 |
| 86  | 0.001571  | -0.000903 | -0.000206 | -0.003542 | -0.004447 | 0.001468  | 0.004427  | -0.000674 | -0.000918 | -0.000746 | -0.000903 | 0.000254  |
| 87  | 0.000418  | -0.000255 | 0.000061  | -0.001625 | -0.001935 | 0.000935  | 0.012102  | -0.002572 | -0.002765 | -0.000740 | -0.001046 | 0.001316  |
| 88  | -0.002008 | 0.001081  | 0.000401  | 0.003712  | 0.004845  | -0.030810 | 0.013124  | 0.005520  | 0.003948  | 0.000797  | 0.001126  | -0.000549 |
| 89  | -0.000264 | 0.000051  | -0.000058 | 0.000653  | 0.000653  | -0.001773 | -0.002078 | 0.000834  | 0.000801  | 0.000257  | 0.000405  | -0.000315 |
| 90  | -0.000165 | 0.000156  | 0.000055  | 0.000953  | 0.000776  | -0.001225 | -0.000896 | 0.000727  | 0.000760  | -0.000071 | 0.000016  | -0.000358 |
| 91  | -0.006066 | 0.002111  | -0.001197 | 0.017792  | 0.016324  | -0.003076 | -0.000302 | 0.001191  | 0.001331  | -0.000158 | -0.000136 | -0.000411 |
| 92  | -0.000227 | 0.000253  | 0.000085  | 0.000544  | 0.000648  | -0.028397 | -0.031360 | 0.016157  | 0.017417  | -0.000652 | 0.002606  | -0.005875 |
| 93  | 0.000049  | 0.000012  | -0.000027 | 0.000040  | 0.000110  | -0.003810 | 0.000329  | 0.001975  | 0.001992  | -0.000875 | -0.000566 | -0.001320 |
| 94  | 0.000040  | -0.000006 | -0.000054 | 0.000093  | 0.000185  | -0.013872 | -0.000742 | 0.004259  | 0.003251  | 0.000961  | 0.001318  | -0.000785 |
| 95  | 0.000044  | 0.000040  | -0.000011 | 0.000083  | 0.000162  | -0.002204 | -0.000919 | 0.001098  | 0.000896  | -0.000212 | -0.000116 | -0.000246 |
| 96  | 0.000047  | 0.000027  | -0.000023 | 0.000107  | 0.000181  | -0.002582 | -0.001329 | 0.001431  | 0.001200  | -0.000246 | -0.000065 | -0.000401 |
| 97  | 0.000055  | 0.000013  | -0.000043 | 0.000092  | 0.000136  | 0.000043  | -0.000211 | 0.000124  | 0.000026  | -0.000082 | -0.000051 | 0.000035  |
| 98  | 0.000056  | -0.000012 | -0.000060 | 0.000098  | 0.000136  | -0.000028 | -0.000275 | 0.000165  | 0.000037  | -0.000058 | -0.000027 | 0.000010  |
| 99  | 0.000029  | 0.000023  | -0.000022 | 0.000037  | 0.000109  | -0.000083 | -0.000320 | 0.000155  | 0.000049  | -0.000049 | 0.000003  | 0.000039  |
| 100 | 0.000049  | 0.000040  | 0.000017  | -0.000015 | 0.000041  | -0.000119 | -0.000320 | 0.000165  | 0.000065  | -0.000049 | 0.000001  | 0.000038  |
| 101 | -0.000328 | 0.000323  | 0.000205  | 0.000748  | 0.000906  | -0.000045 | -0.000390 | 0.000047  | -0.000004 | -0.000009 | 0.000069  | 0.000079  |
| 102 | -0.000162 | 0.000319  | 0.000319  | 0.000554  | 0.000474  | -0.000045 | -0.000325 | 0.000033  | -0.000009 | -0.000009 | 0.000056  | 0.000080  |

|     |           |           |           |           |           |           |           |           |           |           |           |           |
|-----|-----------|-----------|-----------|-----------|-----------|-----------|-----------|-----------|-----------|-----------|-----------|-----------|
| 103 | -0.000361 | 0.000084  | 0.000060  | 0.002489  | 0.002699  | 0.000245  | -0.000542 | -0.000060 | -0.000116 | 0.000067  | 0.000139  | 0.000050  |
| 104 | -0.001332 | 0.000697  | 0.000434  | 0.001510  | 0.000755  | -0.000021 | -0.000162 | -0.000007 | -0.000064 | 0.000024  | 0.000071  | 0.000073  |
| 105 | -0.001232 | -0.000275 | -0.000608 | 0.001420  | 0.001305  | -0.000893 | -0.002370 | 0.000501  | 0.000482  | 0.000349  | 0.000488  | -0.000209 |
| 106 | -0.000339 | 0.001186  | 0.000820  | 0.002119  | 0.003137  | -0.000569 | -0.002049 | 0.000184  | 0.000434  | 0.000397  | 0.000412  | -0.000050 |
| 107 | -0.000119 | 0.000062  | -0.000058 | 0.000717  | 0.000858  | -0.001707 | -0.009813 | 0.001992  | 0.001960  | 0.000327  | 0.000377  | -0.000126 |
| 108 | -0.000281 | 0.000181  | -0.000018 | 0.000883  | 0.001063  | 0.000719  | -0.002238 | 0.000580  | 0.000812  | 0.000400  | 0.000659  | -0.001183 |
| 109 | 0.000120  | -0.000003 | 0.000070  | -0.000621 | -0.000562 | 0.001811  | 0.000541  | -0.001162 | -0.000943 | 0.000104  | 0.000150  | 0.000481  |
| 110 | 0.000137  | -0.000053 | -0.000016 | -0.000010 | -0.000075 | -0.000087 | 0.001535  | 0.000359  | 0.000166  | -0.000357 | -0.000558 | -0.000191 |
| 111 | 0.000028  | -0.000052 | -0.000063 | -0.000668 | -0.000461 | 0.001279  | -0.000080 | -0.000968 | -0.000765 | 0.000289  | 0.000322  | 0.000351  |
| 112 | 0.000146  | -0.000100 | 0.000005  | -0.000314 | -0.000329 | -0.000011 | 0.000940  | 0.000226  | -0.000004 | -0.000216 | -0.000333 | 0.000015  |
| 113 | 0.003456  | -0.004752 | -0.004975 | -0.006204 | -0.004425 | 0.001627  | 0.000059  | -0.000991 | -0.000882 | 0.000359  | 0.000359  | 0.000242  |
| 114 | 0.002581  | 0.002526  | 0.006032  | -0.011428 | -0.011780 | 0.001431  | 0.000264  | -0.000182 | -0.000440 | -0.000204 | -0.000233 | 0.000157  |
| 115 | 0.000101  | -0.000260 | -0.000121 | -0.000265 | -0.000279 | -0.002554 | 0.025384  | 0.002614  | -0.000629 | -0.007816 | -0.007989 | 0.000747  |
| 116 | 0.000146  | 0.000004  | 0.000027  | -0.000316 | -0.000385 | 0.030857  | 0.006231  | -0.019107 | -0.017092 | 0.008753  | 0.005637  | 0.005238  |
| 117 | -0.000071 | 0.000018  | 0.000416  | -0.000604 | 0.000013  | 0.000455  | 0.001471  | -0.001084 | -0.001160 | 0.000368  | 0.000227  | 0.000651  |
| 118 | -0.000050 | -0.000328 | -0.000450 | 0.001990  | 0.000429  | 0.000142  | 0.000235  | -0.000276 | -0.000142 | -0.000031 | -0.000045 | 0.000291  |
| 119 | 0.000220  | -0.000261 | -0.000021 | 0.000724  | -0.000772 | 0.000844  | 0.000450  | -0.000732 | -0.000527 | 0.000124  | 0.000009  | 0.000419  |
| 120 | -0.000093 | -0.000148 | -0.000278 | 0.001070  | 0.000387  | -0.000534 | -0.000301 | 0.000426  | 0.000108  | -0.000073 | 0.000074  | -0.000132 |
| 121 | 0.000098  | 0.000099  | 0.000247  | -0.000703 | -0.000415 | 0.000259  | 0.000220  | -0.000228 | -0.000075 | 0.000039  | -0.000036 | 0.000077  |
| 122 | -0.000005 | 0.000049  | 0.000032  | -0.000371 | 0.000028  | 0.000274  | 0.000094  | -0.000201 | -0.000037 | 0.000037  | -0.000039 | 0.000055  |
| 123 | -0.000121 | -0.000040 | -0.000199 | 0.000532  | 0.000441  | -0.000444 | -0.000584 | 0.000459  | 0.000375  | -0.000173 | -0.000037 | -0.000093 |
| 124 | 0.000066  | 0.000019  | 0.000128  | -0.000182 | -0.000310 | 0.000050  | 0.000490  | -0.000237 | -0.000145 | 0.000037  | -0.000037 | 0.000121  |
| 125 | 0.000056  | 0.000021  | 0.000069  | -0.000343 | -0.000132 | 0.000396  | 0.000066  | -0.000215 | -0.000221 | 0.000130  | 0.000074  | -0.000028 |
| 126 | 0.000126  | -0.000235 | -0.000223 | 0.000519  | -0.000170 | 0.001422  | 0.000296  | -0.001002 | -0.000790 | 0.000333  | 0.000136  | 0.000359  |
| 127 | 0.000025  | -0.000226 | -0.000312 | 0.000851  | 0.000136  | 0.000195  | 0.000447  | -0.000216 | -0.000281 | 0.000001  | -0.000046 | 0.000230  |
| 128 | -0.000029 | -0.000019 | -0.000045 | 0.000117  | 0.000104  | 0.000000  | -0.000143 | 0.000009  | -0.000009 | 0.000047  | 0.000050  | -0.000043 |
| 129 | 0.000026  | 0.000004  | 0.000032  | -0.000049 | -0.000097 | 0.000116  | 0.000579  | -0.000284 | -0.000264 | 0.000137  | 0.000017  | 0.000063  |
| 130 | 0.000031  | 0.000011  | 0.000030  | -0.000058 | -0.000110 | 0.000083  | 0.000046  | -0.000087 | 0.000044  | -0.000004 | -0.000036 | 0.000044  |
| 131 | -0.000017 | -0.000001 | -0.000021 | 0.000019  | 0.000064  | 0.000108  | 0.000190  | -0.000127 | -0.000108 | 0.000097  | 0.000024  | 0.000014  |
| 132 | -0.000015 | 0.000009  | -0.000010 | 0.000001  | 0.000046  | -0.000057 | -0.000332 | 0.000152  | 0.000116  | -0.000096 | -0.000018 | -0.000028 |
| 133 | 0.000002  | -0.000004 | 0.000011  | -0.000028 | 0.000000  | -0.000251 | -0.000349 | 0.000340  | 0.000223  | -0.000180 | -0.000036 | -0.000052 |
| 134 | -0.000326 | 0.000081  | 0.000127  | 0.001100  | 0.000223  | -0.006501 | 0.001720  | 0.002461  | 0.002325  | 0.000818  | -0.000117 | -0.002379 |
| 135 | -0.000583 | 0.000114  | 0.000223  | 0.001312  | 0.000754  | -0.004128 | -0.008158 | 0.004529  | 0.004604  | -0.001826 | -0.001539 | -0.000877 |
| 136 | -0.000359 | -0.000028 | 0.000017  | 0.000806  | 0.000623  | 0.002272  | -0.003005 | -0.000188 | -0.000364 | 0.000731  | 0.000815  | 0.000054  |
| 137 | -0.000135 | 0.000023  | 0.000024  | 0.000119  | 0.000262  | -0.001351 | -0.002043 | 0.001530  | 0.001222  | 0.000683  | 0.000290  | -0.001655 |
| 138 | -0.000089 | -0.000040 | -0.000048 | 0.000215  | 0.000200  | -0.005480 | 0.001215  | 0.002358  | 0.001816  | 0.000789  | 0.000228  | -0.002183 |
| 139 | -0.000288 | -0.000120 | -0.000095 | 0.001073  | 0.000586  | -0.001427 | -0.000357 | 0.000605  | 0.000662  | 0.000103  | 0.000054  | -0.000468 |
| 140 | 0.000000  | -0.000045 | -0.000079 | 0.000075  | 0.000055  | -0.001883 | -0.000314 | 0.001278  | 0.001130  | 0.000111  | -0.000138 | -0.001101 |
| 141 | 0.000007  | -0.000020 | -0.000052 | 0.000029  | 0.000034  | -0.000735 | -0.000507 | 0.000838  | 0.000704  | -0.000082 | -0.000160 | -0.000662 |
| 142 | -0.000203 | 0.000009  | 0.000040  | 0.000689  | 0.000200  | -0.000932 | 0.000226  | 0.000216  | 0.000266  | -0.000017 | 0.000026  | -0.000106 |
| 143 | -0.000246 | -0.000068 | 0.000021  | 0.001016  | 0.000385  | -0.001021 | 0.000577  | 0.000075  | 0.000115  | -0.000024 | 0.000039  | 0.000073  |
| 144 | -0.000305 | -0.000425 | 0.000023  | 0.001408  | 0.001350  | -0.000723 | 0.001658  | 0.000280  | -0.000224 | -0.000010 | -0.000149 | -0.000317 |
| 145 | 0.000258  | -0.000430 | -0.000078 | 0.000789  | 0.000206  | -0.000038 | 0.000640  | -0.000308 | -0.000421 | 0.000048  | 0.000104  | 0.000185  |
| 146 | 0.000265  | -0.000080 | 0.000091  | -0.000554 | -0.000255 | 0.000044  | 0.000426  | -0.000156 | -0.000244 | 0.000038  | 0.000028  | 0.000078  |
| 147 | -0.000165 | 0.000764  | 0.000945  | -0.001093 | -0.000359 | -0.000402 | -0.000179 | 0.000479  | 0.000340  | 0.000030  | -0.000101 | -0.000351 |
| 148 | -0.000316 | -0.001336 | -0.001818 | -0.001830 | -0.000377 | -0.001669 | 0.002020  | 0.000891  | 0.000342  | -0.000118 | -0.000402 | -0.000492 |
| 149 | -0.001387 | 0.000540  | 0.001102  | 0.002131  | 0.000953  | -0.001613 | 0.003874  | 0.001942  | 0.000197  | -0.000496 | -0.001227 | -0.000880 |
| 150 | -0.000660 | -0.001133 | -0.001731 | 0.004028  | 0.002194  | -0.001420 | 0.003480  | 0.001222  | 0.000138  | -0.000344 | -0.000821 | -0.000414 |
| 151 | -0.000044 | 0.000746  | 0.000695  | -0.000268 | -0.000383 | 0.000559  | 0.000759  | 0.001039  | -0.000167 | 0.000023  | -0.000348 | -0.000489 |
| 152 | -0.000968 | 0.000640  | 0.000803  | 0.001336  | 0.000712  | 0.002918  | -0.002724 | 0.000026  | -0.000356 | 0.000713  | 0.000558  | -0.000371 |

|     |           |           |           |           |           |           |           |           |           |           |           |           |
|-----|-----------|-----------|-----------|-----------|-----------|-----------|-----------|-----------|-----------|-----------|-----------|-----------|
| 153 | -0.001154 | 0.000523  | 0.000822  | 0.001880  | 0.000932  | 0.010810  | -0.001791 | 0.000405  | -0.001101 | -0.002497 | -0.002025 | -0.000894 |
| 154 | -0.000284 | -0.000234 | -0.000201 | 0.001116  | 0.000767  | -0.002436 | -0.000059 | 0.001537  | 0.001191  | 0.000180  | -0.000150 | -0.001241 |
| 155 | -0.000248 | -0.000098 | 0.000094  | 0.000851  | 0.000406  | -0.001250 | 0.001000  | 0.000445  | 0.000275  | -0.000080 | -0.000150 | -0.000233 |
| 156 | -0.001748 | -0.007165 | -0.008659 | 0.009745  | 0.007247  | -0.001088 | 0.001250  | 0.001130  | 0.000569  | -0.000197 | -0.000552 | -0.000739 |
| 157 | -0.000657 | 0.000075  | 0.000282  | 0.001231  | 0.000574  | 0.002660  | -0.000939 | 0.011478  | 0.010452  | -0.009500 | -0.008426 | -0.003765 |
| 158 | 0.000006  | -0.000072 | -0.000136 | 0.000560  | 0.000024  | -0.000128 | 0.000068  | 0.000148  | -0.000049 | 0.000021  | 0.000047  | -0.000077 |
| 159 | 0.000044  | -0.000155 | -0.000318 | 0.001334  | -0.000052 | 0.000326  | -0.003689 | 0.000944  | 0.001098  | -0.000869 | 0.000030  | -0.000002 |
| 160 | 0.000032  | -0.000093 | -0.000225 | 0.000916  | -0.000034 | 0.000282  | -0.003671 | 0.000945  | 0.001197  | -0.000860 | -0.000009 | -0.000013 |
| 161 | 0.000001  | 0.000056  | 0.000090  | -0.000522 | 0.000037  | -0.000364 | -0.000165 | 0.000483  | 0.000208  | -0.000280 | -0.000113 | -0.000028 |
| 162 | 0.000071  | -0.000054 | -0.000050 | -0.000120 | -0.000169 | -0.000100 | 0.000171  | 0.000026  | 0.000010  | -0.000013 | -0.000032 | -0.000019 |
| 163 | 0.000003  | 0.000169  | 0.000393  | -0.002776 | 0.000301  | 0.000059  | -0.002339 | 0.000628  | 0.001101  | -0.000701 | -0.000250 | 0.000017  |
| 164 | -0.000051 | -0.000089 | -0.000015 | 0.001406  | 0.001148  | 0.003460  | -0.001554 | -0.000821 | -0.000564 | -0.001309 | -0.001389 | 0.001630  |
| 165 | -0.000017 | 0.000072  | 0.000064  | -0.000043 | -0.000026 | -0.002251 | -0.002350 | 0.001546  | 0.001432  | 0.000361  | 0.000425  | -0.001013 |
| 166 | 0.000194  | 0.000040  | 0.000059  | -0.000290 | -0.000529 | 0.000139  | -0.000377 | -0.000473 | -0.000223 | -0.000834 | -0.000044 | 0.001437  |
| 167 | -0.000020 | -0.000033 | -0.000098 | 0.000130  | 0.000082  | -0.001681 | -0.000569 | 0.001482  | 0.001295  | -0.000164 | -0.000288 | -0.001093 |
| 168 | -0.000028 | 0.000023  | 0.000030  | 0.000033  | -0.000025 | -0.000146 | 0.000027  | -0.000026 | 0.000007  | 0.000064  | 0.000045  | -0.000019 |
| 169 | 0.000311  | -0.000003 | -0.000044 | -0.001062 | -0.000327 | 0.001485  | -0.000395 | -0.000429 | -0.000479 | 0.000124  | 0.000033  | 0.000153  |
| 170 | 0.000477  | -0.000469 | -0.000983 | -0.000966 | -0.000409 | 0.000349  | -0.001273 | 0.000451  | 0.000528  | -0.000116 | -0.000089 | -0.000383 |
| 171 | -0.000239 | -0.000121 | -0.000293 | 0.000656  | 0.000267  | 0.000643  | -0.001334 | 0.000028  | 0.000166  | 0.000059  | 0.000085  | -0.000110 |
| 172 | 0.001255  | 0.000548  | 0.000743  | -0.000969 | -0.001082 | 0.000973  | -0.000707 | -0.000689 | -0.000333 | -0.000024 | 0.000214  | 0.000454  |
| 173 | 0.001048  | -0.001269 | -0.001252 | -0.000321 | -0.001263 | -0.002085 | 0.000669  | 0.001763  | 0.000832  | 0.000083  | -0.000440 | -0.001151 |
| 174 | -0.000616 | 0.000503  | 0.000382  | 0.001004  | 0.000816  | -0.001731 | -0.000450 | -0.000085 | 0.000799  | -0.000138 | -0.000117 | -0.000155 |
| 175 | 0.000775  | -0.000534 | -0.000983 | -0.000952 | 0.000079  | -0.002125 | 0.004907  | -0.001089 | -0.001743 | 0.001163  | 0.000938  | 0.001755  |
| 176 | 0.000673  | 0.000343  | 0.000195  | -0.002278 | -0.001451 | -0.001649 | -0.002249 | 0.002897  | 0.002373  | -0.000501 | -0.000784 | -0.002089 |
| 177 | -0.000500 | -0.000140 | -0.000005 | 0.002096  | 0.000629  | -0.003119 | 0.001738  | -0.000218 | 0.000183  | 0.000335  | 0.000463  | 0.000349  |
| 178 | -0.000397 | 0.000045  | 0.000100  | 0.001021  | 0.000100  | 0.001032  | 0.000806  | -0.001899 | -0.001387 | 0.000278  | 0.000552  | 0.001451  |
| 179 | 0.000113  | 0.000467  | 0.000417  | -0.001084 | -0.000111 | -0.000835 | -0.001041 | 0.001403  | 0.001112  | 0.000009  | -0.000316 | -0.001105 |
| 180 | 0.002825  | 0.004410  | 0.005268  | -0.008682 | -0.004125 | 0.000531  | -0.003066 | 0.000647  | 0.001031  | 0.000144  | 0.000064  | -0.000779 |
| 181 | -0.000780 | -0.005369 | -0.006220 | 0.005494  | 0.001643  | 0.001476  | -0.003571 | -0.001018 | -0.000254 | 0.000560  | 0.000865  | 0.000192  |
| 182 | -0.001167 | -0.000240 | -0.000218 | 0.002505  | 0.002485  | -0.025026 | 0.033479  | -0.007108 | -0.007774 | 0.006158  | 0.006256  | 0.005101  |
| 183 | -0.000077 | 0.000260  | 0.000283  | -0.000354 | -0.000022 | 0.033994  | -0.026599 | 0.003483  | 0.002602  | -0.007067 | -0.007110 | -0.002081 |
| 184 | 0.000057  | 0.000045  | -0.000011 | -0.000180 | -0.000050 | 0.000384  | -0.003240 | 0.000778  | 0.000842  | -0.000790 | 0.000093  | 0.000057  |
| 185 | 0.000071  | -0.000199 | -0.000372 | 0.001875  | -0.000249 | 0.000889  | -0.004051 | 0.000565  | 0.000994  | -0.000802 | 0.000072  | 0.000136  |
| 186 | -0.000020 | -0.000014 | -0.000040 | 0.000088  | 0.000085  | 0.000086  | 0.000713  | -0.000355 | -0.000273 | 0.000267  | 0.000043  | 0.000006  |
| 187 | -0.000039 | 0.000146  | 0.000319  | -0.001438 | 0.000109  | -0.000981 | 0.003696  | -0.000306 | -0.000932 | 0.000685  | -0.000038 | -0.000185 |
| 188 | -0.000068 | 0.000026  | 0.000117  | -0.000395 | 0.000102  | -0.000387 | 0.003039  | -0.000718 | -0.000691 | 0.000671  | -0.000167 | -0.000008 |
| 189 | -0.000001 | -0.000006 | -0.000010 | 0.000010  | 0.000017  | -0.000049 | 0.000200  | -0.000025 | -0.000080 | 0.000022  | -0.000014 | -0.000003 |
| 190 | 0.000136  | -0.000111 | -0.000085 | -0.000212 | -0.000127 | 0.000696  | -0.000032 | -0.000261 | -0.000188 | 0.000004  | -0.000021 | 0.000053  |
| 191 | 0.000058  | -0.000253 | -0.000189 | 0.000326  | 0.000110  | 0.000016  | 0.000925  | -0.000280 | -0.000099 | -0.000021 | -0.000109 | 0.000155  |
| 192 | -0.000047 | 0.000069  | 0.000065  | 0.000076  | -0.000038 | -0.000160 | -0.000058 | 0.000072  | 0.000075  | -0.000031 | -0.000002 | -0.000004 |
| 193 | 0.000070  | 0.000014  | 0.000013  | -0.000235 | -0.000146 | 0.000168  | 0.000203  | -0.000143 | -0.000136 | 0.000021  | 0.000003  | 0.000042  |
| 194 | 0.000172  | -0.000032 | 0.000000  | -0.000402 | -0.000387 | 0.000411  | 0.000308  | -0.000238 | -0.000097 | -0.000082 | -0.000112 | 0.000125  |
| 195 | -0.000011 | 0.000166  | 0.000170  | -0.000218 | -0.000365 | 0.000906  | -0.000086 | -0.000468 | -0.000332 | 0.000114  | 0.000059  | 0.000057  |
| 196 | -0.000002 | -0.000008 | -0.000006 | -0.000009 | 0.000025  | -0.000200 | 0.000089  | 0.000055  | 0.000040  | 0.000005  | 0.000001  | -0.000012 |
| 197 | 0.000053  | -0.000018 | 0.000010  | -0.000088 | -0.000140 | 0.000164  | 0.000173  | -0.000144 | -0.000087 | 0.000007  | -0.000006 | 0.000064  |
| 198 | 0.000044  | -0.000013 | 0.000005  | -0.000066 | -0.000115 | 0.000083  | 0.000170  | -0.000101 | -0.000057 | -0.000005 | -0.000014 | 0.000057  |
| 199 | 0.000047  | -0.000013 | 0.000009  | -0.000086 | -0.000148 | 0.000167  | 0.000266  | -0.000151 | -0.000081 | -0.000012 | -0.000046 | 0.000077  |
| 200 | -0.000018 | -0.000006 | -0.000013 | 0.000024  | 0.000051  | 0.000063  | -0.000012 | -0.000002 | -0.000015 | -0.000020 | -0.000025 | -0.000010 |
| 201 | 0.000027  | -0.000039 | 0.000013  | -0.000093 | -0.000079 | 0.000715  | -0.000395 | -0.000154 | -0.000158 | 0.000086  | 0.000042  | -0.000080 |
| 202 | 0.000129  | -0.000068 | 0.000019  | -0.000204 | -0.000388 | 0.000549  | 0.000400  | -0.000482 | -0.000304 | 0.000049  | 0.000026  | 0.000234  |

|     |           |           |           |           |           |           |           |           |           |           |           |           |
|-----|-----------|-----------|-----------|-----------|-----------|-----------|-----------|-----------|-----------|-----------|-----------|-----------|
| 203 | 0.000009  | 0.000007  | -0.000010 | 0.000040  | 0.000010  | 0.000258  | -0.000062 | -0.000191 | -0.000150 | 0.000026  | 0.000059  | 0.000103  |
| 204 | 0.000032  | -0.000029 | -0.000008 | -0.000022 | -0.000057 | 0.000075  | -0.000172 | 0.000059  | 0.000044  | 0.000014  | 0.000001  | -0.000088 |
| 205 | 0.000118  | -0.000047 | 0.000041  | -0.000115 | -0.000234 | -0.000520 | 0.001105  | 0.000086  | 0.000148  | -0.000139 | -0.000217 | -0.000001 |
| 206 | 0.000019  | 0.000010  | 0.000063  | -0.000215 | -0.000269 | 0.000048  | 0.000657  | -0.000274 | -0.000178 | -0.000010 | -0.000015 | 0.000196  |
| 207 | -0.000031 | 0.000001  | -0.000009 | 0.000025  | 0.000055  | -0.000072 | 0.000011  | 0.000056  | 0.000016  | -0.000011 | -0.000006 | -0.000027 |
| 208 | 0.000058  | -0.000028 | -0.000011 | -0.000062 | -0.000117 | 0.000180  | 0.000146  | -0.000123 | -0.000076 | -0.000004 | -0.000017 | 0.000049  |
| 209 | 0.000054  | -0.000015 | -0.000003 | -0.000047 | -0.000111 | 0.000123  | 0.000134  | -0.000110 | -0.000053 | -0.000001 | -0.000011 | 0.000050  |
| 210 | 0.000081  | -0.000018 | 0.000032  | -0.000107 | -0.000200 | 0.000185  | 0.000174  | -0.000159 | -0.000085 | 0.000015  | -0.000005 | 0.000057  |
| 211 | -0.000016 | 0.000028  | 0.000063  | -0.000018 | -0.000023 | -0.000149 | 0.000122  | 0.000041  | 0.000026  | -0.000012 | -0.000006 | -0.000006 |
| 212 | -0.514478 | -0.515245 | -0.552041 | 0.132410  | 0.137838  | 0.000208  | 0.000421  | -0.000135 | -0.000111 | 0.000028  | -0.000049 | 0.000006  |
| 213 | 0.148807  | -0.574561 | -0.538835 | -0.537386 | -0.572875 | 0.000160  | 0.000322  | -0.000202 | -0.000042 | 0.000001  | -0.000053 | 0.000113  |
| 214 | 0.289660  | 0.153994  | 0.151032  | -0.567987 | -0.532510 | 0.000086  | 0.000205  | -0.000137 | -0.000099 | 0.000036  | 0.000020  | 0.000057  |
| 215 | 0.517539  | 0.525901  | 0.297994  | 0.159518  | 0.158230  | 0.000037  | -0.000201 | 0.000045  | 0.000062  | -0.000001 | 0.000021  | -0.000031 |
| 216 | 0.150547  | 0.288382  | 0.518789  | 0.531598  | 0.303005  | 0.000622  | 0.000430  | -0.000407 | -0.000243 | 0.000050  | -0.000063 | 0.000143  |
| 217 | -0.553525 | 0.145484  | 0.146475  | 0.268165  | 0.510105  | 0.000794  | -0.000271 | -0.000291 | -0.000243 | 0.000114  | 0.000055  | 0.000032  |
| 218 | -0.002671 | -0.004746 | -0.004476 | 0.003045  | 0.012861  | -0.000029 | -0.000017 | 0.000051  | 0.000031  | -0.000002 | -0.000002 | -0.000048 |
| 219 | -0.056552 | 0.011689  | 0.000000  | -0.005358 | -0.005390 | 0.000123  | 0.000236  | -0.000123 | -0.000060 | -0.000018 | -0.000041 | 0.000076  |
| 220 | 0.118971  | -0.066244 | -0.056642 | 0.010262  | -0.001181 | 0.000131  | 0.000123  | -0.000115 | -0.000052 | -0.000002 | -0.000009 | 0.000060  |
| 221 | -0.067232 | 0.119064  | 0.119388  | -0.065121 | -0.054877 | 0.000202  | 0.000124  | -0.000160 | -0.000077 | 0.000013  | -0.000010 | 0.000067  |
| 222 | 0.008460  | -0.055014 | -0.064495 | 0.116065  | 0.124134  | -0.000024 | -0.000074 | 0.000000  | 0.000008  | 0.000052  | 0.000029  | -0.000029 |
| 223 | 0.000047  | -0.000096 | -0.000072 | -0.000088 | -0.000141 | 0.235468  | 0.557608  | 0.514551  | 0.265244  | 0.144675  | 0.143290  | -0.552802 |
| 224 | 0.000097  | -0.000052 | 0.000013  | -0.000105 | -0.000300 | 0.144996  | 0.131968  | 0.301981  | 0.529671  | 0.519188  | 0.289500  | 0.149248  |
| 225 | 0.000039  | -0.000021 | -0.000011 | -0.000091 | -0.000168 | -0.567972 | -0.584250 | 0.158578  | 0.160652  | 0.297201  | 0.525396  | 0.516312  |
| 226 | -0.000012 | 0.000009  | -0.000015 | 0.000029  | 0.000049  | -0.581973 | -0.567681 | -0.532461 | -0.566672 | 0.150269  | 0.153775  | 0.288244  |
| 227 | 0.000143  | -0.000070 | -0.000005 | -0.000235 | -0.000338 | 0.139643  | 0.139576  | -0.572944 | -0.537110 | -0.537307 | -0.572561 | 0.150725  |
| 228 | 0.000051  | -0.000094 | -0.000059 | -0.000017 | -0.000138 | 0.547070  | 0.243540  | 0.138847  | 0.133169  | -0.550285 | -0.513510 | -0.512749 |
| 229 | -0.000012 | 0.000009  | -0.000001 | 0.000001  | -0.000008 | -0.050204 | -0.083045 | 0.124747  | 0.113604  | -0.064080 | -0.054553 | 0.008206  |
| 230 | 0.000065  | -0.000021 | 0.000018  | -0.000085 | -0.000162 | -0.004176 | 0.009319  | -0.054723 | -0.065181 | 0.119218  | 0.119027  | -0.067271 |
| 231 | 0.000047  | -0.000023 | -0.000007 | -0.000047 | -0.000105 | -0.005483 | -0.004620 | -0.001030 | 0.010381  | -0.056560 | -0.066076 | 0.119540  |
| 232 | 0.000061  | -0.000030 | -0.000006 | -0.000080 | -0.000137 | 0.008569  | -0.003349 | -0.005568 | -0.005525 | 0.000069  | 0.011791  | -0.056715 |
| 233 | -0.000014 | -0.000006 | -0.000030 | 0.000030  | 0.000039  | -0.081245 | -0.049250 | 0.013752  | 0.003442  | -0.004434 | -0.004687 | -0.002712 |
| 234 | 0.000451  | 0.000166  | 0.000209  | -0.001557 | -0.001334 | 0.001723  | 0.000514  | -0.000923 | -0.000636 | 0.000090  | -0.000027 | 0.000207  |
| 235 | -0.000033 | -0.000397 | -0.000227 | 0.000901  | 0.000278  | 0.000528  | 0.000859  | -0.000481 | -0.000177 | -0.000027 | -0.000148 | 0.000275  |
| 236 | -0.000219 | 0.000007  | -0.000059 | 0.000565  | 0.000604  | -0.000840 | -0.000535 | 0.000511  | 0.000300  | 0.000010  | 0.000091  | -0.000190 |
| 237 | -0.000158 | -0.000032 | -0.000076 | 0.000504  | 0.000460  | -0.000872 | 0.000051  | 0.000389  | 0.000304  | -0.000065 | -0.000024 | -0.000095 |
| 238 | 0.000040  | 0.000035  | 0.000033  | -0.000196 | -0.000118 | 0.000156  | -0.000116 | -0.000024 | -0.000044 | 0.000016  | 0.000014  | -0.000002 |
| 239 | 0.000019  | 0.000034  | 0.000021  | -0.000141 | -0.000030 | -0.000006 | -0.000189 | 0.000076  | 0.000012  | -0.000004 | 0.000024  | -0.000037 |
| 240 | 0.000061  | -0.000059 | -0.000026 | -0.000031 | -0.000108 | 0.000186  | 0.000287  | -0.000179 | -0.000095 | 0.000005  | -0.000028 | 0.000080  |
| 241 | 0.000073  | -0.000074 | -0.000036 | -0.000043 | -0.000112 | 0.000140  | 0.000340  | -0.000182 | -0.000090 | 0.000000  | -0.000036 | 0.000092  |
| 242 | -0.000071 | 0.000024  | 0.000014  | 0.000168  | 0.000106  | -0.000310 | 0.000016  | 0.000139  | 0.000117  | -0.000023 | -0.000005 | -0.000034 |
| 243 | -0.000038 | 0.000005  | 0.000014  | 0.000108  | 0.000019  | -0.000154 | 0.000214  | 0.000036  | 0.000058  | -0.000043 | -0.000049 | 0.000017  |
| 244 | -0.000030 | 0.000147  | 0.000089  | -0.000214 | -0.000001 | -0.000280 | -0.000508 | 0.000248  | 0.000108  | 0.000007  | 0.000063  | -0.000099 |
| 245 | -0.000098 | 0.000143  | 0.000045  | -0.000064 | 0.000235  | -0.000271 | -0.000935 | 0.000390  | 0.000143  | 0.000034  | 0.000128  | -0.000213 |
| 246 | 0.000166  | -0.000079 | 0.000081  | -0.000489 | -0.000548 | -0.000648 | 0.001639  | 0.000264  | 0.000281  | -0.000149 | -0.000403 | -0.000216 |
| 247 | 0.000254  | -0.000105 | 0.000039  | -0.000354 | -0.000686 | 0.001836  | 0.000347  | -0.001363 | -0.000937 | 0.000186  | 0.000197  | 0.000675  |
| 248 | -0.000181 | 0.000089  | -0.000024 | 0.000272  | 0.000432  | -0.000083 | -0.000887 | 0.000172  | 0.000047  | 0.000053  | 0.000166  | -0.000052 |
| 249 | -0.000091 | 0.000044  | -0.000017 | 0.000170  | 0.000224  | 0.000289  | -0.000800 | -0.000059 | -0.000102 | 0.000091  | 0.000177  | 0.000022  |
| 250 | 0.000008  | -0.000013 | -0.000015 | 0.000003  | 0.000018  | -0.000025 | -0.000046 | 0.000096  | 0.000068  | -0.000014 | -0.000031 | -0.000076 |
| 251 | -0.000026 | 0.000001  | -0.000022 | 0.000063  | 0.000114  | -0.000171 | -0.000136 | 0.000194  | 0.000129  | -0.000025 | -0.000030 | -0.000117 |
| 252 | 0.000078  | -0.000039 | -0.000002 | -0.000084 | -0.000178 | 0.000002  | 0.000397  | -0.000113 | -0.000037 | -0.000025 | -0.000056 | 0.000074  |



|     |           |           |           |           |           |           |           |           |           |           |           |           |
|-----|-----------|-----------|-----------|-----------|-----------|-----------|-----------|-----------|-----------|-----------|-----------|-----------|
| 253 | 0.000089  | -0.000045 | 0.000000  | -0.000085 | -0.000186 | 0.000030  | 0.000378  | -0.000118 | -0.000038 | -0.000022 | -0.000056 | 0.000070  |
| 254 | -0.000030 | 0.000032  | 0.000009  | 0.000018  | 0.000047  | 0.000184  | -0.000198 | -0.000117 | -0.000108 | 0.000049  | 0.000080  | 0.000060  |
| 255 | 0.000011  | 0.000016  | 0.000035  | -0.000061 | -0.000080 | 0.000311  | -0.000074 | -0.000208 | -0.000173 | 0.000057  | 0.000065  | 0.000090  |
| 256 | -0.000081 | 0.000021  | -0.000038 | 0.000252  | 0.000317  | -0.000799 | -0.000164 | 0.000553  | 0.000409  | -0.000113 | -0.000079 | -0.000231 |
| 257 | -0.000194 | 0.000077  | -0.000045 | 0.000297  | 0.000525  | -0.000927 | -0.000453 | 0.000700  | 0.000461  | -0.000090 | -0.000033 | -0.000299 |
| 258 | 0.019683  | -0.106311 | -0.020750 | -0.310536 | -0.349760 | 0.001939  | 0.000013  | -0.000694 | -0.000559 | 0.000028  | -0.000120 | 0.000160  |
| 259 | 0.020473  | -0.169412 | -0.105525 | -0.310166 | -0.339002 | -0.000150 | 0.001437  | -0.000478 | -0.000221 | 0.000014  | -0.000114 | 0.000309  |
| 260 | -0.169924 | 0.006858  | 0.007915  | -0.104190 | -0.016209 | -0.000721 | -0.000517 | 0.000457  | 0.000277  | 0.000009  | 0.000104  | -0.000191 |
| 261 | -0.104059 | 0.009614  | 0.008182  | -0.165674 | -0.102538 | -0.000520 | -0.000255 | 0.000245  | 0.000201  | 0.000004  | 0.000063  | -0.000086 |
| 262 | -0.285349 | -0.102126 | -0.166962 | 0.009398  | 0.009228  | -0.000024 | 0.000058  | 0.000033  | 0.000023  | -0.000036 | -0.000030 | -0.000008 |
| 263 | -0.313770 | -0.014485 | -0.101985 | 0.010286  | 0.007612  | -0.000133 | -0.000082 | 0.000115  | 0.000063  | -0.000024 | -0.000001 | -0.000045 |
| 264 | 0.559754  | -0.313771 | -0.285054 | -0.105179 | -0.170748 | 0.000178  | 0.000286  | -0.000185 | -0.000099 | -0.000004 | -0.000038 | 0.000102  |
| 265 | 1.066750  | -0.356821 | -0.312942 | -0.017975 | -0.105792 | 0.000217  | 0.000227  | -0.000182 | -0.000091 | -0.000007 | -0.000036 | 0.000089  |
| 266 | -0.356821 | 1.069970  | 0.560294  | -0.305258 | -0.278541 | -0.000093 | -0.000120 | 0.000051  | 0.000029  | 0.000011  | 0.000037  | -0.000022 |
| 267 | -0.312942 | 0.560294  | 1.069160  | -0.346607 | -0.305721 | 0.000034  | 0.000028  | -0.000044 | -0.000034 | 0.000024  | 0.000007  | 0.000021  |
| 268 | -0.017975 | -0.305258 | -0.346607 | 1.075530  | 0.570315  | -0.000310 | -0.000350 | 0.000260  | 0.000196  | -0.000022 | 0.000030  | -0.000121 |
| 269 | -0.105792 | -0.278541 | -0.305721 | 0.570315  | 1.081080  | -0.000419 | -0.000723 | 0.000424  | 0.000217  | 0.000003  | 0.000098  | -0.000209 |
| 270 | 0.000217  | -0.000093 | 0.000034  | -0.000310 | -0.000419 | 1.211590  | 0.459375  | -0.342352 | -0.309866 | -0.102889 | -0.165909 | 0.023737  |
| 271 | 0.000227  | -0.000120 | 0.000028  | -0.000350 | -0.000723 | 0.459375  | 1.206120  | -0.344530 | -0.312797 | -0.022811 | -0.109141 | 0.017457  |
| 272 | -0.000182 | 0.000051  | -0.000044 | 0.000260  | 0.000424  | -0.342352 | -0.344530 | 1.085700  | 0.569059  | -0.306985 | -0.280333 | -0.106063 |
| 273 | -0.000091 | 0.000029  | -0.000034 | 0.000196  | 0.000217  | -0.309866 | -0.312797 | 0.569059  | 1.076380  | -0.346157 | -0.305265 | -0.018297 |
| 274 | -0.000007 | 0.000011  | 0.000024  | -0.000022 | 0.000003  | -0.102889 | -0.022811 | -0.306985 | -0.346157 | 1.069100  | 0.560044  | -0.313170 |
| 275 | -0.000036 | 0.000037  | 0.000007  | 0.000030  | 0.000098  | -0.165909 | -0.109141 | -0.280333 | -0.305265 | 0.560044  | 1.070670  | -0.356925 |
| 276 | 0.000089  | -0.000022 | 0.000021  | -0.000121 | -0.000209 | 0.023737  | 0.017457  | -0.106063 | -0.018297 | -0.313170 | -0.356925 | 1.065180  |
| 277 | 0.000080  | -0.000017 | 0.000023  | -0.000118 | -0.000191 | 0.025898  | 0.015365  | -0.170938 | -0.105345 | -0.285200 | -0.313758 | 0.559048  |
| 278 | -0.000031 | 0.000019  | -0.000001 | 0.000040  | 0.000047  | -0.111306 | -0.165207 | 0.008229  | 0.011108  | -0.101934 | -0.014645 | -0.313764 |
| 279 | 0.000004  | -0.000007 | 0.000001  | -0.000002 | -0.000034 | -0.026989 | -0.100181 | 0.009727  | 0.010093  | -0.166923 | -0.102325 | -0.285064 |
| 280 | -0.000094 | 0.000064  | -0.000002 | 0.000105  | 0.000247  | -0.314247 | -0.305551 | -0.103910 | -0.165250 | 0.008477  | 0.010072  | -0.103363 |
| 281 | -0.000176 | 0.000049  | -0.000057 | 0.000290  | 0.000540  | -0.347158 | -0.337941 | -0.017541 | -0.103601 | 0.008458  | 0.007516  | -0.168735 |
| 282 | 0.000124  | 0.000000  | -0.000028 | -0.000152 | -0.000025 | -0.000664 | 0.000695  | 0.000465  | 0.000317  | -0.000169 | -0.000277 | -0.000231 |
| 283 | 0.000041  | -0.000005 | 0.000001  | -0.000053 | -0.000049 | -0.000470 | 0.000193  | 0.000208  | 0.000163  | -0.000031 | -0.000047 | -0.000069 |
| 284 | -0.000001 | -0.000027 | -0.000017 | 0.000016  | 0.000011  | 0.000121  | 0.000143  | -0.000109 | -0.000064 | -0.000005 | -0.000015 | 0.000046  |
| 285 | 0.000001  | -0.000007 | -0.000005 | 0.000003  | 0.000006  | 0.000108  | 0.000037  | -0.000057 | -0.000038 | -0.000005 | -0.000012 | 0.000026  |
| 286 | -0.000023 | 0.000031  | 0.000022  | -0.000002 | -0.000001 | 0.000126  | -0.000036 | -0.000076 | -0.000063 | 0.000022  | 0.000021  | 0.000034  |
| 287 | -0.000013 | 0.000006  | 0.000025  | -0.000027 | -0.000052 | 0.000156  | 0.000112  | -0.000172 | -0.000101 | 0.000034  | 0.000027  | 0.000068  |
| 288 | -0.000035 | 0.000002  | -0.000051 | -0.000183 | -0.000075 | 0.000065  | -0.000217 | -0.000127 | -0.000057 | 0.000120  | 0.000133  | -0.000052 |
| 289 | -0.000018 | 0.000020  | -0.000041 | -0.000021 | 0.000023  | 0.000050  | 0.000034  | -0.000056 | -0.000038 | 0.000028  | 0.000016  | -0.000001 |
| 290 | 0.000038  | -0.000019 | 0.000023  | -0.000036 | -0.000078 | 0.000014  | 0.000098  | -0.000015 | -0.000009 | -0.000012 | -0.000021 | 0.000016  |
| 291 | 0.000027  | -0.000011 | 0.000014  | -0.000017 | -0.000048 | 0.000072  | -0.000080 | 0.000019  | -0.000016 | 0.000009  | 0.000013  | 0.000000  |
| 292 | 0.000024  | -0.000021 | -0.000006 | 0.000012  | -0.000012 | -0.000033 | -0.000042 | 0.000026  | 0.000024  | -0.000005 | -0.000003 | 0.000001  |
| 293 | 0.000049  | -0.000020 | 0.000001  | -0.000053 | -0.000089 | 0.000010  | 0.000138  | -0.000009 | -0.000006 | -0.000018 | -0.000038 | 0.000027  |
| 294 | 0.001449  | -0.000185 | 0.000380  | -0.003881 | -0.001105 | 0.000078  | 0.000030  | -0.000309 | -0.000157 | 0.000172  | 0.000191  | 0.000068  |
| 295 | -0.000047 | -0.001347 | -0.000809 | 0.003834  | 0.005051  | -0.000077 | -0.000242 | 0.000052  | 0.000049  | -0.000006 | 0.000054  | -0.000021 |
| 296 | 0.000674  | -0.002242 | -0.002892 | 0.001167  | 0.001064  | 0.000073  | 0.000052  | -0.000036 | -0.000019 | 0.000003  | -0.000020 | 0.000021  |
| 297 | 0.000625  | -0.000303 | 0.000488  | -0.000649 | -0.000457 | 0.000154  | -0.000018 | -0.000075 | -0.000049 | 0.000019  | 0.000003  | 0.000023  |
| 298 | -0.001078 | -0.000415 | -0.000665 | 0.000825  | -0.000175 | 0.000053  | 0.000149  | -0.000035 | -0.000025 | -0.000012 | -0.000034 | 0.000017  |
| 299 | -0.000953 | -0.000604 | -0.000570 | -0.002134 | -0.001115 | 0.000153  | 0.000021  | 0.000002  | -0.000038 | -0.000035 | -0.000038 | -0.000006 |
| 300 | 0.000034  | 0.000105  | 0.000087  | -0.000119 | -0.000160 | 0.025341  | -0.017017 | -0.005716 | -0.003260 | 0.000661  | 0.000962  | 0.001453  |
| 301 | -0.000040 | 0.000040  | 0.000011  | 0.000103  | 0.000135  | 0.002865  | -0.004745 | -0.002407 | -0.003416 | -0.000296 | -0.000001 | -0.001105 |
| 302 | 0.000007  | -0.000020 | -0.000012 | -0.000016 | -0.000024 | -0.000854 | 0.001664  | 0.000702  | -0.000423 | 0.000923  | 0.000378  | 0.001595  |

|     |           |           |           |           |           |           |           |           |           |           |           |           |
|-----|-----------|-----------|-----------|-----------|-----------|-----------|-----------|-----------|-----------|-----------|-----------|-----------|
| 303 | 0.000019  | -0.000031 | -0.000020 | 0.000002  | -0.000023 | -0.004113 | 0.001600  | 0.001178  | 0.001250  | 0.000343  | 0.001196  | -0.001648 |
| 304 | 0.000021  | -0.000027 | -0.000011 | -0.000039 | -0.000069 | -0.001406 | -0.001116 | -0.000266 | 0.000132  | 0.001758  | 0.001058  | -0.000071 |
| 305 | -0.000016 | -0.000053 | -0.000039 | 0.000049  | 0.000046  | 0.000429  | 0.002905  | 0.000947  | 0.001326  | -0.000101 | -0.000888 | -0.000510 |
| 306 | 0.000018  | -0.000109 | -0.000059 | 0.000115  | 0.000148  | -0.001286 | 0.001213  | 0.000275  | 0.000279  | -0.000070 | -0.000141 | -0.000110 |
| 307 | 0.000060  | 0.000027  | 0.000013  | -0.000097 | -0.000060 | -0.000349 | 0.000337  | 0.000225  | 0.000165  | -0.000086 | -0.000134 | -0.000100 |
| 308 | 0.000022  | -0.000037 | -0.000029 | 0.000003  | 0.000015  | 0.000005  | 0.000094  | 0.000011  | 0.000020  | -0.000018 | -0.000037 | -0.000014 |
| 309 | -0.000010 | 0.000006  | 0.000002  | 0.000008  | 0.000021  | -0.000056 | -0.000015 | 0.000028  | 0.000006  | -0.000002 | 0.000006  | -0.000009 |
| 310 | -0.000005 | 0.000010  | -0.000002 | 0.000015  | 0.000012  | 0.000104  | -0.000044 | -0.000029 | -0.000030 | 0.000002  | 0.000002  | 0.000014  |
| 311 | 0.000003  | -0.000029 | -0.000008 | 0.000008  | -0.000016 | 0.000073  | -0.000048 | -0.000047 | -0.000005 | 0.000001  | 0.000011  | 0.000012  |
| 312 | -0.000070 | 0.000021  | 0.000023  | 0.000066  | 0.000029  | 0.000216  | -0.000317 | -0.000185 | -0.000151 | 0.000101  | 0.000150  | 0.000096  |
| 313 | 0.000064  | 0.000020  | -0.000115 | -0.000286 | -0.000163 | -0.001051 | 0.001089  | 0.000319  | 0.000291  | -0.000147 | -0.000231 | -0.000001 |
| 314 | -0.000020 | -0.000015 | -0.000037 | -0.000033 | -0.000005 | 0.000168  | -0.000335 | -0.000069 | -0.000058 | 0.000072  | 0.000101  | -0.000046 |
| 315 | 0.000012  | 0.000015  | 0.000012  | -0.000081 | -0.000068 | 0.000009  | 0.000125  | -0.000049 | -0.000020 | 0.000010  | -0.000006 | 0.000017  |
| 316 | -0.000002 | -0.000009 | -0.000004 | 0.000031  | 0.000033  | -0.000080 | 0.000017  | 0.000035  | 0.000030  | -0.000011 | -0.000009 | -0.000002 |
| 317 | -0.000012 | -0.000002 | 0.000013  | 0.000023  | 0.000005  | 0.000062  | -0.000141 | 0.000002  | -0.000010 | 0.000011  | 0.000026  | -0.000016 |
| 318 | 0.000004  | 0.000009  | 0.000010  | -0.000011 | -0.000007 | 0.000018  | 0.000104  | -0.000010 | -0.000013 | -0.000018 | -0.000024 | 0.000014  |
| 319 | 0.000018  | 0.000002  | 0.000007  | 0.000071  | 0.000041  | -0.000169 | 0.000227  | 0.000085  | 0.000067  | -0.000061 | -0.000086 | 0.000037  |
| 320 | 0.001954  | -0.006465 | -0.006610 | -0.009716 | -0.001297 | 0.000537  | -0.000858 | -0.000045 | -0.000044 | -0.000071 | 0.000047  | 0.000014  |
| 321 | -0.000116 | 0.000951  | 0.001290  | 0.000275  | -0.000159 | 0.000290  | -0.000229 | -0.000208 | -0.000130 | 0.000114  | 0.000128  | 0.000027  |
| 322 | -0.000153 | -0.000913 | -0.000427 | -0.000587 | 0.000204  | -0.000007 | 0.000029  | -0.000035 | -0.000021 | 0.000015  | 0.000018  | 0.000015  |
| 323 | 0.000324  | -0.000165 | -0.000001 | 0.000134  | 0.000145  | -0.000146 | 0.000125  | 0.000037  | 0.000046  | -0.000017 | -0.000028 | 0.000004  |
| 324 | 0.001566  | 0.000542  | 0.000685  | -0.001325 | -0.001562 | 0.000105  | -0.000046 | -0.000044 | -0.000030 | 0.000023  | 0.000014  | 0.000005  |
| 325 | 0.000078  | 0.001260  | 0.002293  | -0.001679 | -0.001780 | 0.000062  | -0.000114 | 0.000013  | -0.000016 | 0.000006  | 0.000009  | -0.000012 |
| 326 | -0.001121 | -0.002047 | -0.002394 | 0.000366  | 0.002949  | -0.000307 | 0.000236  | 0.000238  | 0.000152  | -0.000141 | -0.000142 | -0.000039 |
| 327 | -0.000107 | -0.000031 | -0.000053 | 0.000554  | 0.000513  | 0.040076  | 0.019186  | -0.007442 | -0.010379 | -0.007807 | -0.006703 | 0.001424  |
| 328 | 0.000017  | 0.000039  | 0.000028  | -0.000025 | -0.000065 | 0.002668  | -0.004680 | -0.000070 | 0.000644  | -0.000905 | -0.000087 | -0.000360 |
| 329 | -0.000002 | 0.000013  | 0.000009  | -0.000012 | -0.000010 | 0.005935  | 0.000731  | -0.002052 | -0.002733 | 0.001331  | 0.000383  | -0.000980 |
| 330 | 0.000009  | 0.000006  | 0.000008  | -0.000024 | -0.000021 | 0.003154  | -0.001267 | -0.000998 | -0.000968 | -0.000013 | -0.000069 | 0.000469  |
| 331 | 0.000015  | -0.000015 | -0.000007 | -0.000012 | -0.000025 | -0.003589 | 0.001944  | 0.001061  | 0.001481  | -0.000640 | -0.000447 | 0.001528  |
| 332 | -0.000021 | 0.000017  | 0.000006  | 0.000008  | 0.000022  | -0.004226 | 0.002291  | 0.001664  | 0.000957  | -0.001126 | -0.001230 | -0.000200 |
| 333 | -0.000018 | -0.000060 | -0.000044 | 0.000064  | 0.000099  | -0.004390 | 0.002199  | 0.002099  | 0.001902  | 0.000097  | -0.000454 | -0.000430 |

|    | 277       | 278       | 279       | 280       | 281       | 282       | 283       | 284       | 285       | 286       | 287       | 288       |
|----|-----------|-----------|-----------|-----------|-----------|-----------|-----------|-----------|-----------|-----------|-----------|-----------|
| 1  | -0.000487 | 0.000088  | -0.000277 | 0.001035  | 0.001215  | 0.000226  | -0.000260 | 0.000042  | 0.000002  | -0.000023 | -0.000261 | -0.000285 |
| 2  | 0.001241  | 0.000343  | 0.001596  | -0.004163 | -0.003708 | 0.000786  | 0.001305  | -0.000475 | -0.000350 | -0.000212 | 0.000180  | -0.000613 |
| 3  | 0.002002  | -0.001328 | -0.000664 | -0.002459 | -0.000663 | -0.043283 | 0.001499  | 0.000912  | 0.003620  | 0.001196  | -0.000469 | 0.000553  |
| 4  | 0.001180  | 0.000245  | 0.000540  | -0.002568 | -0.002438 | 0.042912  | -0.001344 | -0.001047 | -0.003377 | -0.000585 | 0.001401  | 0.037914  |
| 5  | 0.001402  | -0.000778 | -0.000413 | -0.001732 | -0.001996 | 0.000186  | -0.000245 | -0.000373 | -0.000469 | -0.000159 | -0.000265 | -0.038261 |
| 6  | 0.000006  | 0.001483  | 0.002146  | -0.002662 | -0.002833 | 0.003062  | 0.000345  | -0.000110 | 0.000042  | 0.000113  | -0.000722 | 0.001186  |
| 7  | 0.000107  | -0.000202 | -0.000219 | 0.000034  | -0.000439 | -0.000968 | -0.000113 | 0.000134  | 0.000129  | 0.000094  | 0.000613  | 0.000809  |
| 8  | 0.004707  | -0.004491 | -0.003330 | -0.011134 | -0.008032 | 0.007205  | -0.001888 | -0.000689 | -0.001041 | 0.000541  | 0.002280  | 0.000565  |
| 9  | -0.000811 | 0.001241  | 0.001034  | 0.003441  | 0.003565  | -0.069780 | 0.005384  | 0.002013  | 0.006487  | 0.000809  | -0.004792 | -0.000801 |
| 10 | 0.000408  | 0.000261  | 0.000752  | -0.002434 | -0.002719 | 0.075765  | -0.005529 | -0.001374 | -0.006939 | -0.001975 | 0.003973  | -0.009441 |
| 11 | 0.000329  | -0.000512 | -0.000610 | 0.000664  | 0.000567  | -0.010494 | 0.002203  | -0.000278 | 0.001439  | 0.001010  | -0.000828 | 0.067943  |
| 12 | 0.000061  | 0.000371  | 0.000340  | -0.000020 | -0.000472 | -0.001031 | -0.000366 | 0.000332  | -0.000154 | -0.000424 | 0.000215  | -0.063522 |
| 13 | 0.000691  | -0.000963 | -0.000450 | -0.001694 | -0.001952 | 0.000205  | 0.000281  | -0.000234 | 0.000030  | 0.000138  | -0.000174 | 0.007438  |
| 14 | -0.000647 | 0.000964  | 0.000294  | 0.003700  | 0.005036  | -0.000126 | -0.000348 | -0.000137 | -0.000108 | 0.000168  | 0.000178  | 0.000850  |
| 15 | 0.001782  | 0.000779  | 0.002833  | -0.011228 | -0.014030 | 0.001520  | 0.000576  | 0.000361  | 0.000126  | -0.000282 | -0.000303 | -0.000003 |
| 16 | 0.000635  | -0.000938 | -0.001730 | -0.007335 | -0.000409 | 0.020262  | -0.002147 | -0.001085 | -0.002732 | -0.000780 | 0.002390  | -0.001060 |

|    |           |           |           |           |           |           |           |           |           |           |           |           |
|----|-----------|-----------|-----------|-----------|-----------|-----------|-----------|-----------|-----------|-----------|-----------|-----------|
| 17 | 0.001289  | -0.000809 | 0.000595  | -0.004896 | -0.004270 | 0.000631  | -0.000801 | 0.001262  | 0.000692  | 0.000314  | 0.000756  | -0.000042 |
| 18 | -0.002088 | -0.000550 | -0.000909 | 0.006290  | 0.004530  | -0.028037 | 0.000599  | 0.000351  | 0.002651  | 0.001873  | -0.002403 | 0.000148  |
| 19 | -0.000079 | -0.000167 | -0.000161 | -0.000355 | 0.000133  | 0.035317  | -0.002235 | -0.002631 | -0.003708 | -0.000630 | -0.002029 | -0.025590 |
| 20 | 0.000172  | -0.000180 | -0.000117 | 0.000563  | -0.000233 | -0.002103 | 0.000697  | -0.000093 | -0.000263 | -0.001045 | -0.000535 | -0.002317 |
| 21 | -0.000131 | -0.000033 | 0.000033  | -0.000492 | -0.000165 | -0.027962 | 0.002109  | 0.001180  | 0.003571  | 0.001584  | -0.000161 | 0.031487  |
| 22 | -0.000156 | -0.000071 | 0.000011  | -0.000165 | -0.000130 | 0.000692  | 0.000411  | -0.000072 | 0.000045  | -0.000168 | -0.000508 | -0.026861 |
| 23 | 0.000060  | -0.000069 | -0.000019 | 0.000199  | -0.000255 | -0.000207 | 0.000129  | 0.000026  | 0.000091  | 0.000078  | 0.000354  | 0.000894  |
| 24 | -0.000165 | 0.000143  | 0.000196  | -0.000197 | -0.000212 | -0.001119 | -0.000013 | 0.000211  | 0.000088  | -0.000077 | 0.000021  | 0.019560  |
| 25 | -0.001877 | 0.000865  | 0.000267  | 0.003483  | 0.004457  | 0.001080  | 0.000057  | 0.000140  | -0.000001 | -0.000205 | -0.000013 | -0.000363 |
| 26 | 0.001169  | -0.000549 | 0.000608  | -0.003813 | -0.004282 | -0.000751 | 0.000137  | -0.000035 | 0.000033  | 0.000052  | 0.000257  | -0.000705 |
| 27 | 0.000218  | -0.000789 | -0.000830 | -0.002137 | -0.003274 | -0.000678 | -0.000479 | 0.000248  | -0.000001 | 0.000023  | 0.000405  | 0.000705  |
| 28 | 0.000626  | -0.001306 | -0.000217 | -0.002981 | -0.002812 | -0.045319 | 0.007994  | 0.001004  | 0.006000  | 0.004232  | -0.006101 | -0.001254 |
| 29 | -0.001110 | 0.000198  | -0.000684 | 0.004581  | 0.004168  | 0.054383  | -0.006734 | -0.004522 | -0.006875 | -0.001707 | 0.005548  | 0.000076  |
| 30 | -0.000300 | -0.000082 | -0.000092 | 0.001024  | 0.000408  | 0.000534  | 0.001052  | 0.000804  | 0.000256  | -0.000907 | 0.000066  | 0.048092  |
| 31 | -0.000478 | 0.000039  | -0.000046 | 0.000273  | 0.000249  | -0.001130 | 0.000146  | -0.000426 | 0.000395  | 0.000818  | 0.000038  | -0.041824 |
| 32 | -0.001412 | 0.000780  | -0.000056 | 0.003963  | 0.004238  | 0.000377  | -0.000242 | 0.000200  | 0.000079  | -0.000021 | 0.000586  | -0.000970 |
| 33 | 0.000142  | 0.000026  | 0.000974  | -0.003570 | -0.004335 | -0.001600 | 0.000331  | 0.000059  | 0.000129  | -0.000048 | -0.000128 | -0.000970 |
| 34 | 0.004956  | 0.004367  | 0.005730  | -0.007119 | -0.004043 | -0.001317 | -0.000408 | -0.000725 | -0.000151 | 0.000568  | 0.000663  | -0.001440 |
| 35 | 0.006411  | 0.000408  | 0.000236  | -0.008841 | -0.001432 | -0.002718 | -0.000518 | 0.001299  | 0.000168  | -0.000602 | 0.001167  | 0.000735  |
| 36 | -0.001850 | 0.000067  | 0.000236  | 0.000478  | 0.001996  | 0.000175  | -0.000048 | 0.000056  | 0.000084  | 0.000029  | -0.000035 | -0.000304 |
| 37 | 0.000186  | -0.000089 | 0.000024  | -0.000249 | -0.000418 | 0.010545  | -0.002280 | 0.000584  | -0.001225 | -0.000429 | 0.001793  | 0.000149  |
| 38 | 0.000061  | -0.000014 | 0.000015  | -0.000084 | -0.000136 | -0.011896 | 0.001407  | 0.000583  | 0.001437  | -0.000606 | -0.001643 | -0.000254 |
| 39 | 0.000041  | 0.000007  | 0.000008  | -0.000068 | -0.000112 | -0.000065 | -0.000010 | -0.000028 | -0.000078 | -0.000076 | -0.000102 | -0.011603 |
| 40 | 0.000026  | 0.000016  | 0.000022  | -0.000056 | -0.000113 | -0.000107 | -0.000004 | 0.000006  | -0.000005 | 0.000000  | 0.000024  | 0.009863  |
| 41 | 0.000024  | -0.000005 | 0.000026  | -0.000067 | -0.000119 | 0.000061  | 0.000038  | -0.000011 | -0.000001 | -0.000006 | -0.000007 | -0.000003 |
| 42 | 0.000144  | -0.000072 | 0.000013  | -0.000252 | -0.000344 | 0.000031  | 0.000024  | -0.000004 | 0.000002  | -0.000007 | 0.000007  | -0.000001 |
| 43 | -0.001564 | 0.000105  | 0.000018  | 0.001524  | 0.001452  | -0.000004 | 0.000010  | 0.000012  | 0.000008  | -0.000002 | 0.000024  | -0.000045 |
| 44 | 0.000022  | -0.000053 | 0.000013  | -0.000142 | -0.000093 | 0.004817  | -0.004841 | 0.000135  | -0.001050 | -0.002057 | -0.005897 | -0.000023 |
| 45 | 0.000104  | -0.000222 | -0.000149 | -0.000063 | -0.000148 | -0.000098 | 0.000133  | -0.000050 | -0.000012 | -0.000022 | -0.000133 | 0.002998  |
| 46 | 0.000011  | -0.000080 | -0.000024 | 0.000001  | -0.000077 | -0.000002 | 0.000027  | 0.000048  | 0.000014  | -0.000034 | 0.000041  | 0.000342  |
| 47 | 0.000119  | -0.025903 | -0.017162 | -0.101429 | -0.129015 | -0.000168 | -0.000223 | 0.000085  | 0.000015  | 0.000090  | 0.000150  | -0.000118 |
| 48 | -0.000294 | 0.000220  | 0.000141  | 0.000075  | 0.000267  | -0.000465 | -0.000002 | 0.000066  | 0.000157  | 0.000119  | 0.000414  | -0.000184 |
| 49 | 0.000313  | -0.000290 | -0.000268 | -0.000262 | -0.000601 | 0.000172  | -0.000067 | -0.000082 | -0.000184 | -0.000129 | -0.000401 | 0.000366  |
| 50 | 0.000519  | -0.000356 | -0.000269 | -0.000344 | -0.000732 | 0.000493  | -0.000124 | -0.000074 | -0.000311 | -0.000255 | -0.001028 | 0.000570  |
| 51 | 0.000451  | -0.000536 | -0.000387 | -0.000495 | -0.001048 | -0.000044 | 0.000143  | 0.000146  | 0.000198  | 0.000167  | 0.000621  | 0.000111  |
| 52 | -0.000627 | 0.000405  | 0.000218  | 0.000426  | 0.000916  | 0.000172  | -0.000109 | -0.000023 | -0.000135 | -0.000334 | -0.000599 | -0.000367 |
| 53 | 0.000038  | -0.000033 | -0.000004 | -0.000087 | -0.000149 | -0.000095 | -0.000018 | 0.000013  | -0.000001 | -0.000001 | 0.000013  | 0.000129  |
| 54 | 0.000047  | -0.000040 | -0.000039 | -0.000053 | -0.000112 | 0.000042  | 0.000017  | -0.000002 | -0.000002 | -0.000007 | 0.000000  | 0.000013  |
| 55 | -0.000196 | -0.000014 | -0.000099 | 0.000146  | 0.000305  | 0.000095  | -0.000046 | -0.000103 | -0.000147 | -0.000157 | -0.000310 | -0.000005 |
| 56 | 0.000118  | -0.000177 | -0.000142 | 0.000041  | -0.000115 | 0.000541  | -0.000026 | 0.000001  | -0.000145 | -0.000230 | -0.000561 | 0.000179  |
| 57 | 0.000047  | -0.000040 | -0.000035 | -0.000058 | -0.000102 | 0.000045  | -0.000010 | 0.000003  | -0.000003 | -0.000008 | -0.000011 | -0.000014 |
| 58 | 0.000118  | -0.000105 | -0.000069 | -0.000107 | -0.000230 | -0.000062 | -0.000023 | 0.000030  | 0.000017  | 0.000014  | 0.000012  | 0.000039  |
| 59 | 0.000036  | 0.000044  | 0.000049  | -0.000032 | -0.000062 | -0.000005 | 0.000030  | 0.000005  | 0.000012  | 0.000005  | 0.000043  | -0.000056 |
| 60 | -0.000008 | 0.000034  | 0.000065  | -0.000110 | -0.000107 | 0.000059  | 0.000011  | 0.000012  | -0.000002 | -0.000052 | -0.000081 | 0.000026  |
| 61 | 0.000829  | -0.000363 | -0.000544 | 0.000654  | 0.000494  | -0.001005 | 0.001423  | -0.000105 | 0.000262  | 0.000332  | 0.002300  | 0.000791  |
| 62 | 0.000308  | -0.000646 | -0.000367 | -0.000982 | -0.000729 | 0.000658  | -0.001413 | -0.000087 | -0.000278 | 0.000023  | -0.002067 | -0.000434 |
| 63 | 0.000932  | -0.000909 | -0.000685 | -0.000516 | -0.001477 | 0.002645  | -0.000409 | 0.000081  | -0.000580 | -0.000658 | -0.002115 | -0.000827 |
| 64 | 0.000137  | -0.000128 | -0.000197 | 0.000407  | 0.001429  | -0.001972 | 0.000531  | -0.000316 | 0.000398  | 0.000744  | 0.001847  | 0.001267  |
| 65 | -0.001423 | 0.001642  | 0.001568  | -0.000352 | 0.000790  | -0.003612 | 0.000407  | 0.000184  | 0.001158  | 0.001143  | 0.003517  | -0.000306 |
| 66 | -0.000312 | -0.000010 | -0.000076 | 0.000865  | 0.000508  | 0.001197  | 0.000333  | 0.000405  | -0.000058 | -0.000578 | -0.000026 | -0.001022 |

|     |           |           |           |           |           |           |           |           |           |           |           |           |
|-----|-----------|-----------|-----------|-----------|-----------|-----------|-----------|-----------|-----------|-----------|-----------|-----------|
| 67  | -0.000287 | -0.000342 | -0.000297 | 0.000110  | 0.000136  | 0.001718  | -0.001414 | -0.000126 | -0.000806 | -0.000808 | -0.003675 | 0.000161  |
| 68  | -0.000206 | 0.000807  | 0.000654  | -0.000198 | -0.001174 | 0.000167  | 0.000554  | 0.000003  | -0.000064 | -0.000198 | 0.000311  | 0.000105  |
| 69  | -0.000087 | -0.000664 | -0.000754 | 0.000379  | -0.000036 | 0.002355  | -0.000020 | -0.000542 | -0.000337 | 0.000150  | -0.000887 | 0.003088  |
| 70  | -0.001221 | 0.000058  | -0.000137 | 0.002048  | 0.001419  | 0.003504  | -0.000226 | -0.000195 | -0.000435 | -0.000424 | 0.000153  | 0.000875  |
| 71  | -0.000564 | 0.000393  | 0.000392  | 0.000225  | -0.000665 | -0.001728 | 0.000087  | 0.000301  | 0.000234  | -0.000025 | 0.000657  | -0.002989 |
| 72  | 0.001668  | 0.000403  | 0.000667  | -0.002612 | -0.000695 | -0.004178 | 0.000146  | 0.000477  | 0.000559  | 0.000258  | 0.000086  | -0.001070 |
| 73  | 0.001142  | 0.000822  | -0.000017 | 0.002149  | 0.003394  | 0.025042  | -0.002115 | -0.001061 | -0.003261 | -0.001319 | 0.003062  | -0.000058 |
| 74  | 0.002009  | -0.001117 | -0.000808 | -0.004233 | -0.003808 | -0.005612 | 0.000589  | 0.000199  | 0.000625  | 0.000222  | -0.000563 | -0.000342 |
| 75  | 0.000576  | -0.000976 | -0.000851 | -0.001086 | -0.001329 | -0.016832 | 0.001914  | 0.000818  | 0.002384  | 0.000934  | -0.002400 | -0.000193 |
| 76  | -0.002749 | 0.001028  | 0.000780  | 0.005580  | 0.004572  | -0.045841 | 0.002799  | -0.000600 | 0.002684  | -0.000082 | -0.001465 | 0.001106  |
| 77  | 0.000582  | 0.000425  | 0.000476  | -0.002034 | -0.001473 | 0.049288  | -0.001638 | -0.000281 | -0.003076 | 0.000677  | 0.002181  | -0.027622 |
| 78  | -0.000062 | -0.000200 | -0.000141 | 0.000164  | -0.000047 | 0.021734  | -0.002615 | -0.001208 | -0.002996 | -0.001206 | 0.000788  | 0.004381  |
| 79  | -0.000084 | -0.000147 | -0.000055 | 0.000018  | -0.000159 | 0.005112  | -0.000618 | -0.000315 | -0.000540 | -0.000081 | 0.000784  | 0.018977  |
| 80  | 0.000254  | 0.000171  | 0.000150  | -0.000371 | 0.000043  | -0.031596 | 0.003030  | 0.001767  | 0.004064  | 0.001548  | -0.000379 | 0.045548  |
| 81  | 0.000303  | -0.000034 | -0.000088 | -0.000327 | 0.000069  | 0.001142  | -0.000648 | -0.000361 | -0.000557 | -0.000203 | -0.000370 | -0.042947 |
| 82  | -0.000144 | -0.000013 | 0.000086  | -0.000082 | -0.000309 | -0.000202 | 0.000191  | 0.000091  | 0.000118  | -0.000031 | 0.000080  | -0.015105 |
| 83  | -0.000112 | 0.000070  | 0.000145  | -0.000084 | -0.000321 | -0.000660 | 0.000128  | 0.000165  | 0.000120  | -0.000050 | 0.000158  | -0.004719 |
| 84  | 0.000901  | -0.000601 | -0.000482 | -0.001062 | -0.000858 | -0.000176 | -0.000219 | -0.000083 | -0.000080 | 0.000124  | -0.000133 | 0.023149  |
| 85  | -0.001868 | 0.000471  | -0.000223 | 0.004126  | 0.005360  | 0.001419  | 0.000069  | -0.000242 | -0.000120 | 0.000019  | -0.000380 | 0.001185  |
| 86  | 0.000289  | 0.000162  | 0.000486  | -0.001709 | -0.002122 | -0.000204 | 0.000007  | 0.000139  | 0.000012  | -0.000083 | 0.000275  | -0.000278 |
| 87  | 0.001387  | -0.000371 | 0.000365  | -0.003722 | -0.004843 | -0.000593 | -0.000065 | 0.000114  | -0.000004 | -0.000032 | 0.000314  | -0.000028 |
| 88  | -0.000598 | 0.002134  | 0.001239  | 0.001859  | 0.002392  | 0.001902  | 0.000216  | -0.000065 | 0.000100  | 0.000092  | -0.001130 | 0.000904  |
| 89  | -0.000272 | -0.000018 | -0.000106 | 0.001390  | 0.000874  | 0.001348  | 0.000990  | 0.000583  | -0.000156 | -0.000536 | 0.000542  | 0.000694  |
| 90  | -0.000324 | 0.000072  | -0.000047 | 0.000749  | 0.000596  | 0.001362  | 0.000265  | 0.000030  | 0.000137  | 0.000209  | 0.000275  | 0.000546  |
| 91  | -0.000388 | 0.000495  | 0.000347  | 0.000590  | 0.000525  | -0.000144 | 0.000003  | -0.000031 | 0.000023  | 0.000032  | 0.000029  | -0.001927 |
| 92  | -0.005915 | 0.002198  | -0.001114 | 0.017656  | 0.017277  | -0.002037 | 0.000066  | -0.000108 | 0.000004  | -0.000036 | 0.000322  | -0.000308 |
| 93  | -0.001408 | 0.000839  | 0.000555  | 0.001228  | 0.001072  | 0.002729  | -0.000227 | -0.000154 | -0.000365 | -0.000157 | 0.000245  | 0.000073  |
| 94  | -0.000600 | 0.000275  | 0.000250  | 0.003008  | 0.002738  | 0.002886  | -0.000360 | -0.000046 | -0.000260 | -0.000064 | 0.000320  | 0.000267  |
| 95  | -0.000223 | 0.000444  | 0.000441  | 0.000527  | 0.000517  | 0.012055  | -0.001154 | -0.000602 | -0.001291 | -0.000333 | 0.001498  | 0.000060  |
| 96  | -0.000391 | 0.000547  | 0.000423  | 0.000595  | 0.000823  | 0.004807  | -0.000734 | -0.000217 | -0.001099 | -0.000600 | 0.000919  | 0.000118  |
| 97  | 0.000041  | 0.000103  | 0.000084  | -0.000106 | -0.000008 | -0.006428 | 0.001174  | 0.000612  | 0.001153  | 0.000269  | -0.000748 | -0.002188 |
| 98  | 0.000016  | 0.000101  | 0.000061  | -0.000058 | 0.000056  | -0.015308 | 0.001432  | 0.000597  | 0.001843  | 0.000937  | -0.000052 | -0.002194 |
| 99  | 0.000043  | 0.000071  | 0.000025  | -0.000015 | 0.000080  | -0.002581 | 0.000337  | 0.000103  | 0.000222  | -0.000025 | -0.000497 | -0.013639 |
| 100 | 0.000043  | 0.000074  | 0.000028  | -0.000003 | 0.000076  | -0.002540 | 0.000286  | 0.000201  | 0.000320  | 0.000117  | -0.000281 | -0.005340 |
| 101 | 0.000069  | 0.000000  | -0.000051 | 0.000062  | 0.000172  | 0.000093  | -0.000090 | -0.000054 | -0.000071 | 0.000004  | -0.000057 | 0.003956  |
| 102 | 0.000071  | 0.000016  | -0.000031 | 0.000023  | 0.000139  | 0.000103  | -0.000103 | -0.000040 | -0.000046 | 0.000032  | -0.000021 | 0.011178  |
| 103 | 0.000049  | -0.000053 | -0.000093 | 0.000091  | 0.000222  | 0.000500  | -0.000032 | -0.000095 | -0.000061 | 0.000011  | -0.000111 | 0.002414  |
| 104 | 0.000065  | -0.000019 | -0.000054 | -0.000008 | 0.000101  | 0.000158  | -0.000095 | -0.000070 | -0.000059 | 0.000039  | -0.000047 | 0.002305  |
| 105 | -0.000214 | -0.000056 | -0.000250 | 0.000971  | 0.001196  | 0.000114  | -0.000003 | -0.000070 | -0.000005 | 0.000042  | -0.000133 | 0.000144  |
| 106 | -0.000077 | -0.000104 | -0.000233 | 0.000731  | 0.000917  | 0.000094  | -0.000004 | -0.000070 | -0.000007 | 0.000042  | -0.000143 | 0.000139  |
| 107 | -0.000276 | 0.000999  | 0.000605  | 0.002267  | 0.003361  | 0.000423  | 0.000076  | -0.000082 | -0.000010 | -0.000001 | -0.000191 | -0.000111 |
| 108 | -0.001108 | -0.000618 | -0.000962 | 0.001455  | 0.001475  | 0.000170  | -0.000008 | -0.000033 | 0.000013  | 0.000033  | -0.000120 | 0.000147  |
| 109 | 0.000373  | -0.000516 | -0.000415 | -0.000358 | -0.000067 | -0.043968 | 0.011567  | 0.002822  | 0.007144  | 0.004066  | -0.011306 | -0.000682 |
| 110 | -0.000124 | 0.000551  | 0.000539  | -0.001023 | -0.000809 | 0.042985  | -0.012504 | -0.003395 | -0.006996 | -0.003555 | 0.010735  | -0.000001 |
| 111 | 0.000285  | -0.000389 | -0.000346 | -0.000084 | 0.000104  | -0.000044 | 0.000153  | -0.000100 | -0.000007 | -0.000109 | -0.000278 | 0.033020  |
| 112 | 0.000046  | 0.000304  | 0.000379  | -0.000658 | -0.000687 | -0.001321 | -0.000413 | 0.000054  | -0.000136 | -0.000088 | 0.000007  | -0.033052 |
| 113 | 0.000181  | -0.000516 | -0.000443 | -0.000023 | 0.000025  | 0.000533  | 0.000247  | -0.000027 | 0.000068  | -0.000033 | -0.000167 | 0.000976  |
| 114 | 0.000198  | 0.000031  | 0.000107  | -0.000573 | -0.000563 | -0.000375 | -0.000249 | 0.000060  | -0.000094 | -0.000003 | 0.000132  | 0.000958  |
| 115 | 0.001274  | 0.006550  | 0.010237  | -0.013405 | -0.014401 | 0.001830  | 0.000302  | 0.000023  | 0.000082  | -0.000040 | -0.000303 | -0.000151 |
| 116 | 0.004735  | -0.009050 | -0.009502 | -0.004055 | -0.002659 | 0.000192  | -0.000380 | 0.000086  | -0.000091 | 0.000075  | -0.000028 | 0.000492  |

|     |           |           |           |           |           |           |           |           |           |           |           |           |
|-----|-----------|-----------|-----------|-----------|-----------|-----------|-----------|-----------|-----------|-----------|-----------|-----------|
| 117 | 0.000600  | -0.000471 | -0.000519 | -0.000030 | -0.000502 | 0.000553  | -0.000308 | -0.000255 | -0.000578 | -0.000276 | -0.001510 | 0.001100  |
| 118 | 0.000222  | -0.000085 | -0.000092 | -0.000071 | -0.000146 | 0.000165  | -0.000182 | -0.000100 | -0.000284 | -0.000153 | -0.000834 | 0.000587  |
| 119 | 0.000353  | -0.000241 | -0.000183 | -0.000141 | -0.000372 | 0.000455  | -0.000078 | -0.000107 | -0.000275 | -0.000186 | -0.000815 | 0.000497  |
| 120 | -0.000136 | 0.000093  | 0.000038  | 0.000142  | 0.000294  | 0.000073  | -0.000086 | -0.000037 | -0.000123 | -0.000121 | -0.000380 | 0.000137  |
| 121 | 0.000079  | -0.000051 | -0.000024 | -0.000083 | -0.000176 | -0.000052 | 0.000043  | 0.000018  | 0.000060  | 0.000062  | 0.000200  | -0.000077 |
| 122 | 0.000058  | -0.000043 | -0.000014 | -0.000062 | -0.000122 | -0.000019 | 0.000041  | 0.000019  | 0.000063  | 0.000059  | 0.000177  | -0.000061 |
| 123 | -0.000123 | 0.000124  | 0.000080  | 0.000130  | 0.000285  | 0.000130  | -0.000052 | -0.000018 | -0.000081 | -0.000099 | -0.000393 | 0.000017  |
| 124 | 0.000107  | -0.000041 | -0.000022 | -0.000113 | -0.000210 | -0.000007 | -0.000037 | -0.000034 | -0.000064 | -0.000047 | -0.000140 | 0.000003  |
| 125 | 0.000014  | -0.000081 | -0.000057 | -0.000013 | -0.000065 | -0.000127 | 0.000092  | 0.000053  | 0.000146  | 0.000147  | 0.000539  | -0.000018 |
| 126 | 0.000362  | -0.000366 | -0.000278 | -0.000098 | -0.000370 | 0.000503  | 0.000005  | -0.000006 | -0.000140 | -0.000061 | -0.000457 | 0.000468  |
| 127 | 0.000196  | -0.000082 | -0.000052 | -0.000154 | -0.000236 | 0.000355  | -0.000126 | -0.000043 | -0.000239 | -0.000271 | -0.000935 | 0.000262  |
| 128 | -0.000036 | 0.000006  | -0.000010 | 0.000049  | 0.000079  | 0.000021  | 0.000008  | -0.000022 | -0.000023 | -0.000040 | -0.000019 | -0.000008 |
| 129 | 0.000083  | -0.000075 | -0.000046 | -0.000119 | -0.000205 | -0.000126 | -0.000020 | 0.000015  | 0.000019  | 0.000042  | 0.000075  | 0.000068  |
| 130 | 0.000034  | -0.000015 | -0.000003 | -0.000031 | -0.000076 | 0.000013  | 0.000027  | 0.000009  | 0.000017  | 0.000025  | 0.000082  | -0.000031 |
| 131 | 0.000032  | -0.000058 | -0.000046 | -0.000047 | -0.000079 | 0.000148  | -0.000052 | -0.000003 | -0.000030 | -0.000050 | -0.000229 | -0.000041 |
| 132 | -0.000037 | 0.000047  | 0.000036  | 0.000082  | 0.000135  | -0.000073 | 0.000035  | 0.000010  | 0.000013  | 0.000008  | 0.000088  | 0.000027  |
| 133 | -0.000077 | 0.000095  | 0.000068  | 0.000068  | 0.000150  | 0.000020  | 0.000001  | -0.000010 | 0.000003  | 0.000013  | -0.000003 | -0.000015 |
| 134 | -0.002133 | 0.001750  | 0.001881  | 0.000853  | -0.000651 | -0.002027 | 0.000883  | -0.000263 | 0.000529  | 0.000488  | 0.001170  | -0.000724 |
| 135 | -0.000821 | 0.001879  | 0.002526  | 0.003083  | 0.000814  | 0.000609  | 0.000421  | -0.000320 | 0.000004  | 0.000398  | 0.000446  | -0.000792 |
| 136 | 0.000252  | -0.000864 | -0.001290 | 0.000868  | 0.000734  | 0.001185  | 0.000512  | -0.000503 | -0.000198 | 0.000299  | 0.000880  | -0.000936 |
| 137 | -0.001386 | 0.000560  | 0.000484  | 0.001291  | 0.000399  | 0.001266  | 0.000929  | -0.000060 | -0.000238 | 0.000013  | 0.000636  | -0.000539 |
| 138 | -0.001953 | 0.001230  | 0.001263  | 0.000586  | 0.000162  | 0.010132  | 0.001828  | 0.000582  | -0.000856 | -0.000875 | 0.001384  | -0.000806 |
| 139 | -0.000419 | 0.000470  | 0.000430  | 0.000349  | 0.000004  | -0.000046 | 0.000126  | 0.001026  | 0.000281  | -0.000771 | 0.000382  | -0.000834 |
| 140 | -0.000980 | 0.000708  | 0.000808  | 0.000293  | 0.000101  | 0.010630  | -0.001657 | -0.000200 | -0.001379 | 0.000450  | -0.002947 | -0.001077 |
| 141 | -0.000592 | 0.000466  | 0.000513  | 0.000059  | 0.000162  | -0.000402 | -0.001149 | 0.000161  | 0.000007  | 0.000042  | -0.001441 | -0.000114 |
| 142 | -0.000128 | 0.000137  | 0.000122  | 0.000025  | 0.000169  | 0.000490  | -0.000290 | 0.000582  | -0.000132 | -0.000558 | -0.000303 | 0.000206  |
| 143 | 0.000035  | 0.000092  | 0.000056  | -0.000023 | 0.000010  | 0.002484  | 0.000013  | 0.000753  | -0.000272 | -0.000872 | -0.000449 | -0.010764 |
| 144 | -0.000219 | 0.000256  | 0.000269  | -0.000462 | -0.000352 | 0.000392  | -0.000227 | 0.000210  | -0.000186 | -0.000410 | -0.000678 | 0.004027  |
| 145 | 0.000182  | -0.000136 | -0.000153 | -0.000102 | 0.000007  | 0.000592  | 0.000006  | 0.000366  | -0.000086 | -0.000466 | -0.000225 | -0.006691 |
| 146 | 0.000086  | -0.000086 | -0.000093 | -0.000069 | -0.000049 | 0.000152  | 0.000064  | 0.000071  | -0.000023 | -0.000122 | -0.000044 | -0.000995 |
| 147 | -0.000274 | 0.000286  | 0.000289  | 0.000158  | -0.000274 | 0.000330  | -0.000009 | -0.000023 | -0.000124 | -0.000017 | -0.000114 | -0.000119 |
| 148 | -0.000358 | 0.000467  | 0.000492  | -0.000299 | -0.000869 | 0.000797  | 0.000087  | 0.000102  | -0.000202 | -0.000201 | -0.000259 | 0.000786  |
| 149 | -0.000579 | 0.000543  | 0.000470  | -0.001060 | -0.001178 | 0.001230  | 0.000167  | 0.000085  | -0.000176 | -0.000319 | -0.000396 | -0.000468 |
| 150 | -0.000216 | 0.000240  | 0.000281  | -0.000928 | -0.001213 | 0.000792  | 0.000056  | -0.000012 | -0.000178 | -0.000109 | -0.000270 | 0.000301  |
| 151 | -0.000219 | 0.000129  | 0.000233  | -0.000668 | -0.000854 | 0.000455  | -0.000037 | -0.000064 | -0.000077 | 0.000032  | -0.000156 | 0.000443  |
| 152 | -0.000145 | -0.000549 | -0.000432 | 0.000007  | 0.000346  | 0.000031  | -0.000170 | 0.000019  | 0.000057  | 0.000005  | -0.000131 | -0.000400 |
| 153 | -0.000695 | 0.002266  | 0.003327  | -0.004497 | -0.003277 | 0.000353  | 0.000085  | -0.000012 | 0.000096  | 0.000033  | 0.000004  | -0.000770 |
| 154 | -0.001108 | 0.000872  | 0.000893  | 0.000439  | -0.000104 | 0.018159  | 0.002625  | 0.000506  | -0.000395 | -0.001294 | -0.001417 | 0.000538  |
| 155 | -0.000193 | 0.000377  | 0.000369  | -0.000208 | -0.000347 | 0.000111  | -0.000123 | 0.000452  | 0.000161  | -0.000332 | -0.000110 | -0.014653 |
| 156 | -0.000543 | 0.000625  | 0.000708  | -0.000392 | -0.000767 | 0.000866  | 0.000066  | 0.000090  | -0.000154 | -0.000255 | -0.000357 | 0.000466  |
| 157 | -0.003240 | 0.010079  | 0.012642  | -0.006248 | -0.006963 | 0.000461  | 0.000395  | -0.000040 | 0.000194  | 0.000014  | 0.000326  | -0.001125 |
| 158 | -0.000056 | -0.000018 | -0.000016 | 0.000038  | 0.000021  | 0.000284  | -0.000130 | 0.000011  | -0.000065 | -0.000080 | -0.000328 | -0.000162 |
| 159 | -0.000155 | 0.000213  | 0.000069  | 0.000737  | 0.001290  | -0.000464 | 0.000491  | -0.000006 | 0.000085  | 0.000035  | 0.000843  | 0.000275  |
| 160 | -0.000173 | 0.000239  | 0.000094  | 0.000720  | 0.001243  | -0.000495 | 0.000442  | -0.000013 | 0.000073  | 0.000034  | 0.000783  | 0.000369  |
| 161 | -0.000063 | 0.000101  | 0.000067  | 0.000034  | 0.000118  | -0.000163 | 0.000127  | -0.000020 | 0.000043  | 0.000069  | 0.000233  | 0.000002  |
| 162 | -0.000017 | 0.000020  | 0.000043  | -0.000043 | -0.000045 | 0.000071  | 0.000061  | -0.000026 | -0.000015 | -0.000003 | -0.000034 | 0.000047  |
| 163 | -0.000111 | 0.000337  | 0.000252  | 0.000321  | 0.000683  | -0.001217 | 0.000775  | -0.000097 | 0.000341  | 0.000386  | 0.001732  | 0.000579  |
| 164 | 0.001471  | 0.000632  | 0.000709  | -0.000547 | -0.001765 | -0.002696 | 0.000140  | -0.000107 | 0.000468  | 0.000135  | 0.000905  | -0.001388 |
| 165 | -0.000852 | -0.000028 | -0.000005 | 0.001580  | 0.001196  | -0.004235 | -0.000416 | 0.000682  | 0.000694  | -0.000180 | -0.000330 | 0.000112  |
| 166 | 0.001191  | -0.000746 | -0.000691 | -0.000147 | 0.000784  | -0.001315 | -0.000044 | -0.001694 | -0.000613 | 0.001188  | -0.001166 | 0.000939  |

|     |           |           |           |           |           |           |           |           |           |           |           |           |
|-----|-----------|-----------|-----------|-----------|-----------|-----------|-----------|-----------|-----------|-----------|-----------|-----------|
| 167 | -0.000988 | 0.000826  | 0.000904  | 0.000070  | 0.000215  | -0.007023 | -0.000459 | -0.000500 | 0.001687  | 0.002108  | 0.001743  | 0.004521  |
| 168 | -0.000021 | -0.000027 | -0.000021 | 0.000072  | 0.000049  | 0.003832  | -0.000571 | 0.000214  | -0.000877 | -0.000687 | -0.001425 | 0.003875  |
| 169 | 0.000189  | -0.000268 | -0.000239 | 0.000052  | -0.000233 | 0.004297  | -0.000003 | -0.000660 | -0.000797 | 0.000098  | -0.001386 | -0.005743 |
| 170 | -0.000387 | 0.000156  | 0.000251  | 0.000045  | 0.000467  | -0.001498 | -0.000642 | -0.000329 | 0.000169  | 0.000632  | 0.000096  | -0.004831 |
| 171 | -0.000106 | -0.000004 | 0.000017  | 0.000292  | 0.000263  | -0.000228 | -0.000105 | -0.000100 | 0.000039  | 0.000188  | 0.000074  | -0.001903 |
| 172 | 0.000327  | -0.000423 | -0.000413 | -0.000026 | 0.000644  | -0.001035 | -0.000170 | -0.000040 | 0.000249  | 0.000240  | 0.000312  | -0.002102 |
| 173 | -0.000913 | 0.000490  | 0.000376  | 0.000217  | 0.000154  | 0.000353  | -0.000161 | -0.000056 | -0.000127 | 0.000043  | -0.000231 | 0.000726  |
| 174 | -0.000337 | 0.000269  | 0.000076  | 0.000912  | 0.000952  | 0.000074  | -0.000028 | 0.000010  | -0.000004 | -0.000043 | -0.000075 | -0.000212 |
| 175 | 0.001844  | -0.001980 | -0.002118 | -0.000204 | -0.001353 | -0.000106 | 0.000241  | -0.000003 | -0.000097 | -0.000040 | 0.000196  | 0.000620  |
| 176 | -0.001891 | 0.001529  | 0.002043  | -0.000114 | 0.000462  | 0.010411  | -0.001195 | -0.003170 | -0.004222 | -0.000238 | -0.002823 | 0.001347  |
| 177 | 0.000190  | -0.000107 | -0.000264 | 0.000293  | 0.000169  | -0.012526 | 0.001396  | 0.001597  | 0.004766  | 0.002123  | 0.005071  | 0.003507  |
| 178 | 0.001246  | -0.001069 | -0.001199 | 0.000102  | 0.000080  | 0.004853  | 0.001125  | 0.000510  | -0.000530 | -0.001050 | -0.000585 | -0.012343 |
| 179 | -0.000910 | 0.000879  | 0.000929  | 0.000331  | -0.000454 | 0.000920  | -0.000401 | 0.000024  | -0.000395 | -0.000127 | -0.000594 | 0.008741  |
| 180 | -0.000709 | 0.000649  | 0.000701  | 0.000736  | 0.000049  | -0.000620 | -0.000351 | -0.000253 | -0.000134 | 0.000362  | 0.000022  | -0.000099 |
| 181 | 0.000040  | -0.000776 | -0.000931 | 0.000990  | 0.002410  | -0.000741 | -0.000359 | 0.000228  | 0.000239  | -0.000127 | -0.000126 | -0.001693 |
| 182 | 0.004360  | -0.008510 | -0.010667 | 0.001301  | 0.002440  | -0.001657 | -0.000400 | 0.000372  | 0.000342  | -0.000196 | 0.000082  | -0.001202 |
| 183 | -0.001310 | 0.006866  | 0.008811  | -0.005398 | -0.006254 | -0.000899 | 0.000257  | 0.000275  | -0.000098 | -0.000498 | -0.000227 | 0.000220  |
| 184 | -0.000086 | 0.000134  | -0.000021 | 0.000651  | 0.001190  | -0.000225 | 0.000416  | 0.000015  | 0.000036  | -0.000044 | 0.000616  | 0.000423  |
| 185 | -0.000044 | 0.000112  | -0.000021 | 0.000771  | 0.001372  | -0.000588 | 0.000617  | -0.000005 | 0.000127  | 0.000061  | 0.001083  | 0.000312  |
| 186 | 0.000057  | -0.000081 | -0.000041 | -0.000140 | -0.000280 | 0.000032  | -0.000141 | 0.000000  | -0.000026 | -0.000008 | -0.000221 | 0.000043  |
| 187 | -0.000023 | -0.000093 | 0.000021  | -0.000662 | -0.001180 | 0.000931  | -0.000619 | 0.000030  | -0.000165 | -0.000151 | -0.001212 | -0.000596 |
| 188 | 0.000107  | -0.000088 | 0.000050  | -0.000647 | -0.001153 | -0.000102 | -0.000300 | -0.000040 | 0.000014  | 0.000130  | -0.000336 | -0.000189 |
| 189 | 0.000018  | 0.000003  | 0.000013  | -0.000035 | -0.000048 | -0.000085 | 0.000064  | 0.000012  | 0.000037  | 0.000048  | 0.000193  | -0.000015 |
| 190 | 0.000056  | -0.000105 | -0.000046 | -0.000106 | -0.000047 | 0.004800  | 0.000635  | -0.004662 | -0.002299 | -0.002316 | -0.006343 | 0.000196  |
| 191 | 0.000136  | 0.000008  | 0.000077  | -0.000302 | -0.000505 | 0.003561  | 0.005408  | -0.003354 | -0.000350 | -0.001399 | -0.005940 | 0.000417  |
| 192 | -0.000010 | 0.000036  | 0.000002  | 0.000062  | 0.000017  | -0.004357 | 0.002835  | 0.001924  | 0.000171  | -0.000889 | 0.002039  | -0.000166 |
| 193 | 0.000047  | -0.000055 | -0.000033 | -0.000049 | -0.000069 | -0.005180 | 0.000814  | 0.001090  | -0.000213 | 0.000335  | 0.002259  | -0.000178 |
| 194 | 0.000121  | -0.000070 | 0.000030  | -0.000161 | -0.000237 | 0.002429  | -0.003855 | 0.000457  | 0.000736  | 0.002636  | 0.002160  | 0.000119  |
| 195 | 0.000069  | -0.000147 | -0.000099 | -0.000024 | -0.000051 | -0.004045 | -0.006786 | 0.000327  | 0.001380  | 0.004557  | 0.001777  | -0.000273 |
| 196 | -0.000015 | -0.000001 | -0.000026 | 0.000016  | 0.000048  | -0.001931 | -0.000290 | -0.000080 | 0.000661  | 0.000377  | -0.001742 | 0.000093  |
| 197 | 0.000065  | -0.000032 | -0.000015 | -0.000069 | -0.000120 | -0.000388 | 0.000112  | -0.000120 | -0.000143 | 0.000449  | 0.000173  | -0.000023 |
| 198 | 0.000053  | -0.000016 | -0.000004 | -0.000047 | -0.000118 | 0.000164  | 0.000014  | -0.000394 | -0.000388 | 0.000107  | -0.000110 | -0.000004 |
| 199 | 0.000079  | -0.000025 | 0.000022  | -0.000098 | -0.000198 | -0.000142 | -0.000084 | 0.000018  | 0.000354  | 0.000245  | -0.000016 | -0.000049 |
| 200 | 0.000001  | -0.000007 | -0.000004 | 0.000003  | 0.000029  | 0.000929  | -0.001389 | -0.000289 | -0.000191 | 0.000048  | -0.000603 | 0.000051  |
| 201 | -0.000048 | -0.000027 | 0.000011  | 0.000049  | -0.000040 | -0.000068 | 0.000026  | 0.000007  | -0.000029 | -0.000101 | -0.000148 | 0.004985  |
| 202 | 0.000206  | -0.000173 | -0.000127 | -0.000159 | -0.000219 | 0.000146  | 0.000162  | -0.000057 | -0.000067 | -0.000097 | -0.000102 | 0.000103  |
| 203 | 0.000092  | -0.000099 | -0.000112 | 0.000025  | 0.000049  | 0.000215  | 0.000062  | 0.000003  | -0.000016 | -0.000061 | -0.000031 | -0.002927 |
| 204 | -0.000065 | 0.000057  | 0.000060  | 0.000030  | -0.000015 | 0.000062  | -0.000036 | -0.000019 | -0.000007 | -0.000022 | -0.000086 | -0.002313 |
| 205 | 0.000000  | 0.000200  | 0.000253  | -0.000369 | -0.000546 | -0.000486 | -0.000085 | 0.000011  | -0.000028 | -0.000027 | 0.000011  | -0.001217 |
| 206 | 0.000163  | -0.000084 | -0.000075 | -0.000203 | -0.000225 | -0.000341 | -0.000004 | 0.000029  | -0.000022 | -0.000018 | -0.000003 | -0.001393 |
| 207 | -0.000022 | 0.000026  | 0.000017  | -0.000002 | 0.000013  | -0.000072 | -0.000011 | 0.000002  | -0.000003 | -0.000005 | -0.000016 | -0.001438 |
| 208 | 0.000049  | -0.000017 | 0.000007  | -0.000067 | -0.000126 | 0.000058  | 0.000053  | -0.000028 | -0.000029 | -0.000039 | -0.000028 | 0.000354  |
| 209 | 0.000045  | -0.000011 | 0.000004  | -0.000060 | -0.000109 | -0.000015 | 0.000009  | -0.000005 | -0.000006 | -0.000014 | 0.000008  | -0.000006 |
| 210 | 0.000057  | -0.000033 | -0.000008 | -0.000066 | -0.000132 | 0.000001  | 0.000018  | -0.000004 | -0.000001 | -0.000017 | 0.000005  | 0.000439  |
| 211 | -0.000010 | 0.000022  | 0.000015  | -0.000027 | -0.000017 | -0.000165 | -0.000060 | 0.000023  | 0.000022  | 0.000030  | 0.000023  | 0.000916  |
| 212 | 0.000003  | -0.000050 | -0.000023 | -0.000142 | -0.000155 | -0.000024 | 0.000009  | 0.000052  | 0.000013  | -0.000048 | -0.000010 | 0.000404  |
| 213 | 0.000091  | -0.000031 | 0.000015  | -0.000070 | -0.000300 | 0.000031  | 0.000028  | -0.000019 | -0.000006 | 0.000008  | 0.000054  | 0.000232  |
| 214 | 0.000046  | -0.000022 | -0.000029 | -0.000034 | -0.000132 | 0.000098  | 0.000037  | -0.000039 | -0.000008 | 0.000018  | -0.000022 | -0.000067 |
| 215 | -0.000039 | 0.000004  | -0.000014 | 0.000037  | 0.000080  | 0.000138  | 0.000020  | 0.000011  | 0.000000  | -0.000035 | -0.000034 | -0.000196 |
| 216 | 0.000124  | -0.000093 | -0.000008 | -0.000228 | -0.000327 | 0.000123  | 0.000076  | 0.000034  | 0.000008  | -0.000068 | -0.000030 | -0.000043 |

|     |           |           |           |           |           |           |           |           |           |           |           |           |
|-----|-----------|-----------|-----------|-----------|-----------|-----------|-----------|-----------|-----------|-----------|-----------|-----------|
| 217 | 0.000047  | -0.000106 | -0.000059 | 0.000038  | -0.000109 | 0.000034  | 0.000035  | 0.000003  | -0.000004 | 0.000011  | 0.000052  | 0.000194  |
| 218 | -0.000048 | 0.000007  | 0.000017  | 0.000016  | 0.000024  | -0.000013 | -0.000004 | 0.000001  | 0.000001  | 0.000003  | -0.000004 | 0.000020  |
| 219 | 0.000061  | -0.000011 | 0.000020  | -0.000096 | -0.000166 | 0.000080  | 0.000031  | -0.000005 | -0.000003 | -0.000023 | -0.000015 | -0.000048 |
| 220 | 0.000049  | -0.000013 | 0.000000  | -0.000053 | -0.000118 | 0.000020  | 0.000013  | 0.000001  | 0.000000  | -0.000005 | 0.000002  | -0.000012 |
| 221 | 0.000062  | -0.000027 | -0.000004 | -0.000061 | -0.000130 | 0.000026  | 0.000022  | 0.000000  | 0.000001  | -0.000008 | 0.000007  | -0.000051 |
| 222 | -0.000025 | -0.000014 | -0.000020 | 0.000044  | 0.000054  | -0.000049 | -0.000008 | 0.000008  | -0.000004 | 0.000006  | 0.000012  | 0.000051  |
| 223 | -0.516442 | -0.510522 | -0.547319 | 0.130182  | 0.136123  | 0.000419  | 0.000000  | 0.000032  | 0.000024  | 0.000008  | -0.000021 | -0.000223 |
| 224 | 0.148306  | -0.574301 | -0.538163 | -0.533169 | -0.569062 | -0.000058 | -0.000004 | 0.000083  | 0.000047  | 0.000029  | 0.000127  | -0.000045 |
| 225 | 0.288410  | 0.154841  | 0.152196  | -0.567646 | -0.533602 | 0.000130  | 0.000052  | 0.000004  | 0.000008  | 0.000000  | 0.000015  | -0.000113 |
| 226 | 0.516584  | 0.527537  | 0.299155  | 0.157741  | 0.155462  | -0.000141 | -0.000026 | 0.000019  | 0.000021  | 0.000019  | 0.000039  | 0.000021  |
| 227 | 0.151866  | 0.283540  | 0.514048  | 0.534252  | 0.306126  | -0.000205 | -0.000178 | 0.000095  | 0.000063  | 0.000072  | 0.000099  | -0.000103 |
| 228 | -0.549314 | 0.144856  | 0.145830  | 0.263080  | 0.509323  | 0.000258  | -0.000019 | 0.000078  | 0.000039  | -0.000003 | 0.000078  | 0.000067  |
| 229 | -0.002806 | -0.004838 | -0.004558 | 0.003403  | 0.014108  | 0.000081  | 0.000040  | -0.000027 | -0.000014 | -0.000004 | 0.000006  | -0.000095 |
| 230 | -0.057434 | 0.012329  | 0.000425  | -0.005745 | -0.005783 | 0.000043  | 0.000022  | 0.000004  | 0.000014  | 0.000010  | 0.000026  | -0.000052 |
| 231 | 0.118157  | -0.066495 | -0.056950 | 0.010299  | -0.001161 | -0.000025 | 0.000007  | 0.000019  | 0.000016  | 0.000010  | 0.000025  | -0.000006 |
| 232 | -0.066225 | 0.119363  | 0.117537  | -0.065135 | -0.054811 | -0.000025 | -0.000023 | 0.000042  | 0.000027  | 0.000012  | 0.000027  | -0.000032 |
| 233 | 0.007969  | -0.052898 | -0.062407 | 0.111848  | 0.120620  | 0.000040  | -0.000029 | 0.000017  | -0.000003 | -0.000011 | -0.000004 | 0.000021  |
| 234 | 0.000209  | -0.000325 | -0.000064 | -0.000428 | -0.000345 | -0.018270 | -0.003018 | -0.001864 | 0.001672  | 0.002266  | 0.001858  | -0.000637 |
| 235 | 0.000259  | 0.000021  | 0.000114  | -0.000386 | -0.000831 | 0.025261  | 0.002340  | -0.001377 | -0.003147 | -0.002039 | -0.002895 | 0.000653  |
| 236 | -0.000194 | 0.000133  | -0.000010 | 0.000303  | 0.000422  | 0.001866  | 0.001397  | 0.000362  | -0.000040 | 0.000076  | -0.003032 | 0.000330  |
| 237 | -0.000109 | 0.000162  | 0.000068  | 0.000085  | 0.000108  | -0.001153 | 0.002769  | 0.001499  | -0.000108 | 0.000212  | -0.002546 | 0.000176  |
| 238 | 0.000008  | -0.000036 | -0.000034 | 0.000009  | 0.000052  | -0.000903 | 0.000736  | -0.001080 | 0.000336  | -0.002123 | 0.000262  | -0.000165 |
| 239 | -0.000029 | -0.000014 | -0.000028 | 0.000063  | 0.000131  | -0.001537 | 0.000683  | -0.000634 | -0.000437 | -0.001379 | 0.000989  | -0.000144 |
| 240 | 0.000076  | -0.000034 | 0.000015  | -0.000103 | -0.000209 | 0.000033  | 0.000594  | -0.001003 | 0.000318  | 0.000535  | 0.000524  | 0.000011  |
| 241 | 0.000088  | -0.000035 | 0.000018  | -0.000110 | -0.000227 | 0.000057  | 0.000266  | -0.000717 | -0.000575 | 0.000884  | 0.000793  | 0.000022  |
| 242 | -0.000045 | 0.000078  | 0.000035  | 0.000010  | 0.000023  | 0.000330  | 0.001655  | 0.002692  | 0.000501  | 0.000254  | 0.000687  | 0.000072  |
| 243 | 0.000006  | 0.000063  | 0.000075  | -0.000094 | -0.000128 | 0.000033  | 0.001146  | 0.003255  | -0.000468 | 0.000432  | 0.000874  | 0.000030  |
| 244 | -0.000079 | -0.000021 | -0.000077 | 0.000280  | 0.000357  | -0.002701 | -0.003526 | -0.000886 | 0.001105  | 0.000387  | 0.001974  | -0.000156 |
| 245 | -0.000190 | 0.000006  | -0.000113 | 0.000370  | 0.000648  | -0.004414 | -0.003393 | -0.001366 | 0.000870  | 0.001296  | 0.001260  | -0.000194 |
| 246 | -0.000168 | 0.000441  | 0.000571  | -0.000600 | -0.001010 | -0.000763 | -0.000195 | -0.000020 | -0.000037 | 0.000031  | -0.000038 | -0.011070 |
| 247 | 0.000589  | -0.000600 | -0.000504 | -0.000197 | -0.000232 | 0.000504  | 0.000522  | -0.000076 | -0.000096 | -0.000212 | -0.000064 | 0.022344  |
| 248 | -0.000058 | -0.000096 | -0.000187 | 0.000349  | 0.000576  | 0.000144  | -0.000060 | 0.000053  | 0.000050  | 0.000049  | 0.000032  | -0.002344 |
| 249 | 0.000019  | -0.000162 | -0.000218 | 0.000303  | 0.000439  | 0.000329  | 0.000011  | 0.000012  | 0.000021  | 0.000011  | 0.000014  | -0.004210 |
| 250 | -0.000062 | 0.000067  | 0.000077  | -0.000015 | -0.000038 | 0.000017  | 0.000023  | -0.000026 | -0.000015 | -0.000014 | -0.000033 | 0.000365  |
| 251 | -0.000098 | 0.000092  | 0.000085  | 0.000036  | 0.000038  | -0.000020 | -0.000050 | 0.000000  | 0.000012  | 0.000015  | -0.000029 | -0.000374 |
| 252 | 0.000063  | 0.000003  | 0.000032  | -0.000139 | -0.000203 | 0.000006  | 0.000041  | -0.000019 | -0.000023 | -0.000026 | 0.000000  | 0.001768  |
| 253 | 0.000061  | 0.000005  | 0.000038  | -0.000136 | -0.000212 | 0.000007  | 0.000040  | -0.000019 | -0.000020 | -0.000022 | 0.000005  | 0.001642  |
| 254 | 0.000052  | -0.000096 | -0.000116 | 0.000081  | 0.000129  | 0.000137  | 0.000030  | 0.000004  | 0.000010  | 0.000006  | 0.000017  | -0.001776 |
| 255 | 0.000083  | -0.000116 | -0.000111 | 0.000031  | 0.000044  | 0.000137  | 0.000047  | -0.000002 | 0.000005  | -0.000007 | 0.000005  | -0.001761 |
| 256 | -0.000206 | 0.000230  | 0.000182  | 0.000086  | 0.000133  | -0.000203 | -0.000173 | 0.000035  | 0.000032  | 0.000059  | 0.000028  | -0.002855 |
| 257 | -0.000275 | 0.000233  | 0.000151  | 0.000199  | 0.000335  | -0.000300 | -0.000237 | 0.000059  | 0.000059  | 0.000110  | 0.000064  | -0.003712 |
| 258 | 0.000168  | -0.000147 | 0.000046  | -0.000403 | -0.000429 | 0.000458  | 0.000169  | 0.000128  | 0.000032  | -0.000208 | -0.000099 | -0.000249 |
| 259 | 0.000280  | -0.000068 | 0.000001  | -0.000255 | -0.000754 | -0.000158 | 0.000010  | -0.000050 | -0.000021 | 0.000088  | 0.000164  | 0.000580  |
| 260 | -0.000173 | 0.000080  | -0.000035 | 0.000280  | 0.000431  | -0.000237 | -0.000102 | -0.000040 | -0.000003 | 0.000090  | 0.000023  | 0.000213  |
| 261 | -0.000083 | 0.000044  | -0.000017 | 0.000196  | 0.000206  | -0.000068 | -0.000037 | -0.000055 | -0.000013 | 0.000063  | 0.000010  | 0.000033  |
| 262 | -0.000014 | 0.000012  | 0.000024  | -0.000041 | 0.000003  | -0.000012 | 0.000003  | 0.000018  | 0.000000  | -0.000026 | -0.000010 | -0.000098 |
| 263 | -0.000045 | 0.000034  | 0.000012  | 0.000006  | 0.000100  | -0.000002 | -0.000012 | 0.000016  | 0.000005  | -0.000017 | -0.000023 | -0.000090 |
| 264 | 0.000090  | -0.000029 | 0.000008  | -0.000104 | -0.000203 | 0.000100  | 0.000035  | 0.000001  | 0.000001  | -0.000017 | -0.000004 | -0.000047 |
| 265 | 0.000080  | -0.000031 | 0.000004  | -0.000094 | -0.000176 | 0.000124  | 0.000041  | -0.000001 | 0.000001  | -0.000023 | -0.000013 | -0.000035 |
| 266 | -0.000017 | 0.000019  | -0.000007 | 0.000064  | 0.000049  | 0.000000  | -0.000005 | -0.000027 | -0.000007 | 0.000031  | 0.000006  | 0.000002  |

|     |           |           |           |           |           |           |           |           |           |           |           |           |
|-----|-----------|-----------|-----------|-----------|-----------|-----------|-----------|-----------|-----------|-----------|-----------|-----------|
| 267 | 0.000023  | -0.000001 | 0.000001  | -0.000002 | -0.000057 | -0.000028 | 0.000001  | -0.000017 | -0.000005 | 0.000022  | 0.000025  | -0.000051 |
| 268 | -0.000118 | 0.000040  | -0.000002 | 0.000105  | 0.000290  | -0.000152 | -0.000053 | 0.000016  | 0.000003  | -0.000002 | -0.000027 | -0.000183 |
| 269 | -0.000191 | 0.000047  | -0.000034 | 0.000247  | 0.000540  | -0.000025 | -0.000049 | 0.000011  | 0.000006  | -0.000001 | -0.000052 | -0.000075 |
| 270 | 0.025898  | -0.111306 | -0.026989 | -0.314247 | -0.347158 | -0.000664 | -0.000470 | 0.000121  | 0.000108  | 0.000126  | 0.000156  | 0.000065  |
| 271 | 0.015365  | -0.165207 | -0.100181 | -0.305551 | -0.337941 | 0.000695  | 0.000193  | 0.000143  | 0.000037  | -0.000036 | 0.000112  | -0.000217 |
| 272 | -0.170938 | 0.008229  | 0.009727  | -0.103910 | -0.017541 | 0.000465  | 0.000208  | -0.000109 | -0.000057 | -0.000076 | -0.000172 | -0.000127 |
| 273 | -0.105345 | 0.011108  | 0.010093  | -0.165250 | -0.103601 | 0.000317  | 0.000163  | -0.000064 | -0.000038 | -0.000063 | -0.000101 | -0.000057 |
| 274 | -0.285200 | -0.101934 | -0.166923 | 0.008477  | 0.008458  | -0.000169 | -0.000031 | -0.000005 | -0.000005 | 0.000022  | 0.000034  | 0.000120  |
| 275 | -0.313758 | -0.014645 | -0.102325 | 0.010072  | 0.007516  | -0.000277 | -0.000047 | -0.000015 | -0.000012 | 0.000021  | 0.000027  | 0.000133  |
| 276 | 0.559048  | -0.313764 | -0.285064 | -0.103363 | -0.168735 | -0.000231 | -0.000069 | 0.000046  | 0.000026  | 0.000034  | 0.000068  | -0.000052 |
| 277 | 1.065850  | -0.357062 | -0.313454 | -0.016389 | -0.103982 | -0.000168 | -0.000054 | 0.000041  | 0.000028  | 0.000031  | 0.000060  | -0.000062 |
| 278 | -0.357062 | 1.069300  | 0.560129  | -0.304921 | -0.279911 | 0.000327  | 0.000098  | -0.000034 | -0.000016 | -0.000047 | -0.000065 | -0.000056 |
| 279 | -0.313454 | 0.560129  | 1.069330  | -0.346477 | -0.307863 | 0.000309  | 0.000051  | 0.000006  | 0.000006  | -0.000039 | -0.000053 | -0.000063 |
| 280 | -0.016389 | -0.304921 | -0.346477 | 1.074920  | 0.566528  | -0.000322 | -0.000022 | -0.000048 | -0.000026 | 0.000018  | -0.000019 | 0.000148  |
| 281 | -0.103982 | -0.279911 | -0.307863 | 0.566528  | 1.084110  | -0.000280 | -0.000018 | -0.000083 | -0.000051 | 0.000008  | -0.000048 | 0.000168  |
| 282 | -0.000168 | 0.000327  | 0.000309  | -0.000322 | -0.000280 | 0.350446  | -0.010655 | -0.006952 | -0.038492 | -0.008013 | 0.007270  | 0.000404  |
| 283 | -0.000054 | 0.000098  | 0.000051  | -0.000022 | -0.000018 | -0.010655 | 0.253430  | 0.000857  | -0.005188 | -0.025504 | -0.006123 | 0.000136  |
| 284 | 0.000041  | -0.000034 | 0.000006  | -0.000048 | -0.000083 | -0.006952 | 0.000857  | 0.248417  | 0.000888  | 0.007851  | 0.025408  | -0.000037 |
| 285 | 0.000028  | -0.000016 | 0.000006  | -0.000026 | -0.000051 | -0.038492 | -0.005188 | 0.000888  | 0.246754  | 0.000728  | 0.005316  | 0.000036  |
| 286 | 0.000031  | -0.000047 | -0.000039 | 0.000018  | 0.000008  | -0.008013 | -0.025504 | 0.007851  | 0.000728  | 0.245978  | -0.000352 | -0.000005 |
| 287 | 0.000060  | -0.000065 | -0.000053 | -0.000019 | -0.000048 | 0.007270  | -0.006123 | 0.025408  | 0.005316  | -0.000352 | 0.251143  | -0.000169 |
| 288 | -0.000062 | -0.000056 | -0.000063 | 0.000148  | 0.000168  | 0.000404  | 0.000136  | -0.000037 | 0.000036  | -0.000005 | -0.000169 | 0.339399  |
| 289 | -0.000002 | -0.000015 | -0.000007 | 0.000000  | -0.000009 | 0.000200  | 0.000053  | -0.000008 | -0.000008 | -0.000048 | -0.000091 | -0.010493 |
| 290 | 0.000014  | 0.000000  | 0.000013  | -0.000043 | -0.000055 | -0.000105 | -0.000015 | 0.000016  | 0.000013  | 0.000027  | 0.000045  | -0.007043 |
| 291 | 0.000001  | -0.000016 | -0.000010 | 0.000025  | 0.000021  | 0.000053  | -0.000003 | 0.000006  | 0.000023  | 0.000024  | 0.000021  | -0.037631 |
| 292 | 0.000000  | 0.000004  | -0.000002 | 0.000019  | 0.000011  | 0.000048  | -0.000025 | 0.000012  | 0.000025  | 0.000042  | 0.000039  | -0.006636 |
| 293 | 0.000026  | 0.000001  | 0.000017  | -0.000063 | -0.000086 | -0.000194 | -0.000074 | 0.000028  | 0.000024  | 0.000053  | 0.000079  | 0.009313  |
| 294 | 0.000026  | -0.000199 | -0.000195 | 0.000171  | 0.000123  | 0.000337  | 0.000186  | -0.000081 | 0.000039  | 0.000028  | -0.000081 | -0.000136 |
| 295 | -0.000029 | -0.000019 | -0.000030 | 0.000120  | 0.000151  | 0.000132  | 0.000048  | -0.000028 | 0.000007  | 0.000001  | -0.000031 | -0.000076 |
| 296 | 0.000020  | 0.000000  | 0.000005  | -0.000047 | -0.000052 | 0.000020  | -0.000011 | 0.000005  | 0.000000  | 0.000001  | 0.000001  | -0.000043 |
| 297 | 0.000016  | -0.000023 | -0.000013 | -0.000006 | -0.000030 | 0.000049  | 0.000009  | 0.000002  | 0.000005  | -0.000002 | 0.000000  | -0.000008 |
| 298 | 0.000013  | 0.000004  | 0.000024  | -0.000060 | -0.000093 | -0.000087 | -0.000029 | 0.000021  | 0.000001  | 0.000002  | 0.000023  | 0.000113  |
| 299 | 0.000001  | 0.000019  | 0.000042  | -0.000062 | -0.000058 | -0.000193 | -0.000066 | 0.000030  | 0.000001  | 0.000011  | 0.000042  | 0.000201  |
| 300 | 0.001158  | -0.002703 | -0.001618 | -0.001426 | 0.000898  | -0.000645 | -0.000191 | 0.000062  | -0.000038 | 0.000026  | 0.000181  | 0.000243  |
| 301 | -0.000495 | -0.003443 | -0.002459 | 0.006103  | 0.006765  | -0.000082 | -0.000096 | 0.000063  | 0.000027  | 0.000007  | 0.000013  | 0.000021  |
| 302 | 0.001362  | -0.003314 | -0.004230 | 0.001890  | 0.002080  | 0.000005  | 0.000060  | -0.000053 | -0.000032 | -0.000014 | -0.000029 | 0.000012  |
| 303 | -0.000604 | 0.000327  | 0.001110  | -0.000236 | 0.000204  | 0.000046  | 0.000041  | -0.000038 | -0.000030 | -0.000024 | -0.000034 | 0.000003  |
| 304 | -0.000187 | -0.000071 | -0.000276 | 0.000619  | -0.000369 | 0.000053  | 0.000009  | -0.000016 | -0.000012 | -0.000015 | -0.000027 | -0.000099 |
| 305 | -0.000404 | -0.000523 | -0.000469 | -0.001871 | -0.001016 | 0.000226  | 0.000041  | -0.000043 | -0.000011 | -0.000019 | -0.000121 | -0.000139 |
| 306 | -0.000079 | 0.000208  | 0.000119  | -0.000193 | -0.000214 | -0.010137 | 0.013014  | -0.002820 | 0.001634  | 0.003630  | 0.014969  | -0.000024 |
| 307 | -0.000072 | 0.000152  | 0.000153  | -0.000148 | -0.000144 | 0.003776  | 0.047766  | -0.024155 | 0.025333  | 0.053400  | 0.000148  | 0.000163  |
| 308 | -0.000007 | 0.000035  | 0.000042  | -0.000067 | -0.000063 | 0.069986  | 0.024530  | 0.024391  | 0.050597  | -0.008738 | 0.005064  | 0.000071  |
| 309 | -0.000010 | -0.000006 | -0.000013 | 0.000035  | 0.000037  | 0.035097  | -0.024876 | 0.053516  | -0.009291 | 0.007207  | -0.053248 | 0.000024  |
| 310 | 0.000013  | -0.000009 | 0.000007  | -0.000011 | -0.000020 | -0.034969 | -0.053218 | -0.006120 | 0.009718  | -0.053167 | -0.024294 | -0.000017 |
| 311 | 0.000003  | -0.000016 | -0.000004 | 0.000004  | 0.000016  | -0.067664 | 0.005528  | 0.006736  | -0.051302 | -0.024206 | 0.025176  | -0.000084 |
| 312 | 0.000072  | -0.000153 | -0.000183 | 0.000184  | 0.000171  | -0.003795 | -0.000199 | -0.052974 | -0.025263 | 0.024045  | 0.047125  | -0.000152 |
| 313 | -0.000019 | 0.000174  | 0.000200  | -0.000322 | -0.000303 | -0.000163 | -0.000158 | 0.000086  | 0.000038  | -0.000024 | 0.000076  | -0.005467 |
| 314 | -0.000046 | -0.000049 | -0.000056 | 0.000150  | 0.000167  | 0.000463  | 0.000078  | -0.000004 | 0.000040  | 0.000003  | -0.000066 | 0.003242  |
| 315 | 0.000013  | -0.000009 | 0.000007  | -0.000043 | -0.000054 | -0.000107 | -0.000001 | 0.000001  | 0.000002  | 0.000002  | -0.000029 | 0.066826  |
| 316 | -0.000003 | 0.000016  | 0.000007  | 0.000000  | 0.000001  | 0.000007  | 0.000018  | -0.000012 | -0.000012 | -0.000008 | 0.000006  | 0.033763  |



|     |           |           |           |           |           |           |           |           |           |           |           |           |
|-----|-----------|-----------|-----------|-----------|-----------|-----------|-----------|-----------|-----------|-----------|-----------|-----------|
| 317 | -0.000013 | -0.000010 | -0.000019 | 0.000046  | 0.000064  | 0.000050  | 0.000002  | 0.000001  | 0.000007  | 0.000004  | 0.000006  | -0.033949 |
| 318 | 0.000014  | 0.000003  | 0.000020  | -0.000049 | -0.000059 | -0.000102 | -0.000021 | 0.000013  | -0.000008 | -0.000006 | 0.000016  | -0.066062 |
| 319 | 0.000037  | 0.000046  | 0.000038  | -0.000104 | -0.000117 | -0.000309 | -0.000074 | 0.000001  | -0.000029 | 0.000004  | 0.000067  | -0.002837 |
| 320 | 0.000000  | -0.000032 | 0.000024  | 0.000210  | 0.000221  | -0.000267 | -0.000010 | 0.000035  | 0.000020  | 0.000018  | 0.000095  | 0.000360  |
| 321 | 0.000002  | -0.000139 | -0.000139 | 0.000162  | 0.000123  | 0.000294  | 0.000111  | -0.000037 | 0.000026  | -0.000004 | -0.000038 | -0.000027 |
| 322 | 0.000011  | -0.000016 | -0.000013 | 0.000001  | 0.000002  | 0.000047  | 0.000019  | -0.000017 | 0.000006  | 0.000012  | -0.000020 | -0.000112 |
| 323 | 0.000006  | 0.000025  | 0.000020  | -0.000036 | -0.000034 | -0.000046 | -0.000011 | 0.000006  | -0.000007 | -0.000001 | 0.000007  | 0.000021  |
| 324 | 0.000002  | -0.000019 | -0.000015 | 0.000009  | -0.000004 | 0.000047  | 0.000017  | -0.000002 | 0.000001  | -0.000008 | -0.000006 | -0.000015 |
| 325 | -0.000004 | 0.000000  | -0.000014 | 0.000026  | 0.000043  | 0.000049  | -0.000011 | -0.000002 | 0.000001  | 0.000000  | 0.000000  | -0.000065 |
| 326 | -0.000016 | 0.000149  | 0.000162  | -0.000163 | -0.000130 | -0.000393 | -0.000126 | 0.000052  | -0.000027 | 0.000001  | 0.000058  | 0.000198  |
| 327 | 0.001615  | -0.005651 | -0.005098 | -0.013635 | -0.005835 | 0.000646  | -0.000096 | 0.000029  | 0.000023  | 0.000006  | -0.000181 | -0.000366 |
| 328 | -0.000788 | -0.000543 | -0.000024 | 0.001851  | 0.001226  | -0.000058 | 0.000012  | -0.000005 | -0.000044 | -0.000045 | 0.000024  | -0.000069 |
| 329 | -0.000565 | -0.001473 | -0.000759 | -0.000347 | 0.000421  | -0.000140 | -0.000038 | -0.000005 | -0.000001 | 0.000013  | 0.000009  | 0.000135  |
| 330 | 0.000973  | -0.000510 | -0.000298 | 0.000021  | 0.000178  | -0.000127 | -0.000034 | 0.000025  | 0.000006  | 0.000022  | 0.000052  | 0.000027  |
| 331 | 0.001290  | 0.000405  | 0.000243  | -0.001330 | -0.001252 | 0.000114  | 0.000054  | -0.000026 | -0.000016 | -0.000019 | -0.000006 | -0.000022 |
| 332 | -0.000442 | 0.000957  | 0.002675  | -0.000621 | -0.000557 | 0.000056  | 0.000059  | -0.000026 | 0.000000  | -0.000011 | -0.000040 | -0.000012 |
| 333 | -0.000255 | 0.001195  | 0.000559  | -0.002831 | 0.000003  | 0.000160  | -0.000050 | 0.000036  | 0.000055  | 0.000040  | -0.000039 | -0.000059 |

|    | 289       | 290       | 291       | 292       | 293       | 294       | 295       | 296       | 297       | 298       | 299       | 300       |
|----|-----------|-----------|-----------|-----------|-----------|-----------|-----------|-----------|-----------|-----------|-----------|-----------|
| 1  | -0.000258 | 0.000006  | -0.000070 | -0.000106 | -0.000435 | -0.000672 | 0.000227  | -0.000008 | 0.000052  | 0.000121  | 0.000454  | 0.000174  |
| 2  | 0.000152  | 0.000206  | 0.000463  | 0.000584  | 0.001693  | 0.001408  | -0.000612 | -0.000177 | -0.000596 | -0.000758 | -0.002795 | -0.000893 |
| 3  | -0.000287 | -0.000261 | -0.000353 | -0.000243 | -0.000085 | 0.001689  | 0.000190  | 0.000327  | 0.000252  | -0.000116 | -0.000331 | 0.041269  |
| 4  | -0.001895 | -0.001066 | -0.003247 | -0.000207 | 0.001863  | 0.000285  | 0.000013  | -0.000278 | -0.000372 | -0.000211 | 0.000226  | 0.000053  |
| 5  | 0.001964  | 0.000956  | 0.003295  | 0.000426  | -0.001733 | 0.036029  | -0.001867 | -0.000020 | -0.003075 | -0.000924 | 0.002138  | 0.001226  |
| 6  | 0.000288  | -0.000048 | 0.000169  | 0.000279  | -0.000120 | -0.036208 | 0.001680  | 0.000283  | 0.003102  | 0.000780  | -0.002060 | -0.041045 |
| 7  | 0.000472  | -0.000136 | -0.000113 | -0.000104 | -0.000097 | 0.000285  | -0.000021 | -0.000077 | 0.000045  | -0.000006 | -0.000051 | -0.000386 |
| 8  | 0.000397  | -0.000316 | 0.000038  | 0.000104  | -0.000354 | 0.001027  | 0.000205  | -0.000163 | 0.000165  | 0.000259  | -0.000487 | 0.072696  |
| 9  | -0.000381 | 0.000404  | -0.000198 | -0.000480 | 0.000310  | -0.000120 | -0.000261 | 0.000118  | -0.000077 | -0.000012 | 0.000268  | -0.009756 |
| 10 | 0.002188  | -0.000286 | 0.001311  | 0.000998  | -0.001279 | 0.000046  | 0.000205  | 0.000190  | 0.000031  | -0.000302 | -0.000280 | -0.000727 |
| 11 | -0.005961 | -0.001561 | -0.006656 | -0.001510 | 0.005233  | -0.000154 | -0.000208 | -0.000584 | -0.000191 | 0.000393  | 0.000218  | 0.000217  |
| 12 | 0.005798  | 0.002008  | 0.006148  | 0.000085  | -0.006209 | -0.009029 | 0.001378  | 0.000962  | 0.001235  | -0.000351 | -0.002095 | -0.000087 |
| 13 | -0.001726 | -0.000687 | -0.001074 | 0.000421  | 0.002172  | 0.064496  | -0.005794 | -0.001020 | -0.006181 | -0.001283 | 0.006090  | 0.000542  |
| 14 | 0.000544  | 0.000266  | 0.000105  | -0.000195 | -0.000233 | -0.060137 | 0.006492  | -0.000290 | 0.005985  | 0.001980  | -0.005375 | 0.008620  |
| 15 | -0.000245 | -0.000057 | -0.000102 | 0.000105  | 0.000243  | 0.006845  | -0.002248 | 0.000441  | -0.001034 | -0.000650 | 0.001466  | -0.070819 |
| 16 | -0.000032 | 0.000186  | 0.000052  | -0.000078 | 0.000007  | -0.000461 | -0.000391 | 0.000039  | 0.000036  | 0.000273  | 0.000520  | 0.034210  |
| 17 | 0.000120  | 0.000012  | 0.000047  | 0.000080  | 0.000221  | -0.000398 | -0.000052 | -0.000018 | -0.000035 | -0.000027 | -0.000172 | -0.002242 |
| 18 | 0.000336  | -0.000051 | 0.000018  | -0.000146 | -0.000430 | 0.000792  | -0.000019 | -0.000141 | -0.000009 | 0.000145  | 0.000081  | -0.026020 |
| 19 | 0.002215  | 0.001012  | 0.003237  | 0.001655  | -0.001149 | -0.001334 | -0.000057 | -0.000052 | 0.000069  | 0.000221  | 0.000131  | 0.000937  |
| 20 | 0.000571  | -0.000229 | -0.000392 | -0.000957 | -0.000658 | -0.000040 | -0.000219 | 0.000083  | 0.000023  | 0.000004  | -0.000113 | 0.000068  |
| 21 | -0.001966 | -0.002475 | -0.003149 | -0.000488 | 0.000287  | 0.000195  | 0.000416  | -0.000136 | 0.000036  | -0.000062 | -0.000294 | -0.000758 |
| 22 | 0.000625  | 0.000467  | 0.002928  | 0.001739  | -0.002386 | -0.023923 | 0.001503  | 0.001427  | 0.002992  | 0.000901  | -0.002044 | 0.000912  |
| 23 | -0.000775 | 0.001279  | 0.000635  | 0.000283  | 0.000612  | -0.002163 | 0.000587  | -0.000884 | -0.000442 | -0.000247 | -0.000610 | -0.000459 |
| 24 | -0.002512 | -0.000952 | -0.002819 | -0.000630 | 0.002234  | 0.028897  | -0.000799 | -0.000126 | -0.002736 | -0.002346 | 0.001931  | -0.000399 |
| 25 | -0.000444 | 0.000236  | 0.000017  | 0.000042  | 0.000383  | -0.026164 | 0.002358  | 0.001673  | 0.002807  | 0.000455  | -0.000243 | 0.022917  |
| 26 | 0.000101  | -0.000012 | -0.000028 | 0.000007  | 0.000131  | 0.001452  | -0.000454 | 0.000190  | 0.000588  | 0.001278  | 0.000701  | 0.001259  |
| 27 | -0.000076 | 0.000138  | -0.000021 | -0.000136 | 0.000022  | 0.019491  | -0.002104 | -0.000672 | -0.002800 | -0.001003 | 0.002012  | -0.031002 |
| 28 | 0.000179  | -0.000361 | 0.000309  | 0.000801  | -0.000072 | -0.001316 | 0.000274  | -0.000119 | 0.000024  | 0.000083  | -0.000277 | 0.000859  |
| 29 | 0.001048  | 0.000478  | 0.000138  | -0.000705 | -0.000154 | 0.000363  | -0.000465 | 0.000084  | 0.000052  | 0.000200  | 0.000361  | -0.000718 |
| 30 | -0.007042 | -0.004249 | -0.006214 | -0.001361 | 0.007527  | -0.000781 | 0.000220  | 0.000812  | 0.000303  | -0.000427 | -0.000135 | 0.000552  |

|    |           |           |           |           |           |           |           |           |           |           |           |           |
|----|-----------|-----------|-----------|-----------|-----------|-----------|-----------|-----------|-----------|-----------|-----------|-----------|
| 31 | 0.008288  | 0.001193  | 0.005717  | 0.003222  | -0.007212 | -0.000608 | -0.000066 | -0.000616 | 0.000173  | 0.000545  | -0.000802 | -0.000962 |
| 32 | -0.000481 | 0.001182  | 0.000030  | -0.000711 | 0.000782  | 0.044777  | -0.008244 | -0.001106 | -0.005818 | -0.003999 | 0.006909  | -0.000766 |
| 33 | -0.000491 | -0.000638 | -0.000253 | 0.000457  | 0.000240  | -0.039763 | 0.007598  | 0.003097  | 0.005573  | 0.001048  | -0.007750 | -0.000936 |
| 34 | 0.000327  | 0.000091  | -0.000006 | -0.000133 | -0.000242 | -0.000517 | -0.000720 | -0.000786 | 0.000058  | 0.001269  | 0.000426  | -0.047966 |
| 35 | -0.000285 | 0.000132  | 0.000062  | 0.000081  | 0.000374  | -0.000109 | 0.000043  | 0.000342  | -0.000274 | -0.000651 | 0.000287  | 0.050983  |
| 36 | -0.000057 | 0.000031  | 0.000002  | 0.000030  | 0.000071  | -0.000212 | -0.000049 | 0.000017  | 0.000010  | 0.000026  | 0.000036  | -0.010673 |
| 37 | 0.000043  | -0.000010 | -0.000022 | -0.000028 | -0.000012 | 0.000010  | -0.000022 | 0.000012  | 0.000015  | 0.000019  | -0.000001 | -0.000045 |
| 38 | -0.000042 | -0.000012 | -0.000090 | -0.000066 | -0.000051 | -0.000335 | -0.000078 | 0.000038  | 0.000003  | 0.000034  | 0.000068  | 0.000391  |
| 39 | 0.001592  | 0.000472  | 0.001446  | -0.000304 | -0.001887 | 0.000025  | 0.000004  | -0.000019 | -0.000018 | -0.000005 | -0.000009 | 0.000122  |
| 40 | -0.002819 | 0.000688  | -0.001201 | -0.000305 | 0.001714  | 0.000071  | 0.000097  | -0.000080 | -0.000083 | -0.000043 | -0.000005 | 0.000013  |
| 41 | -0.000048 | 0.000066  | 0.000083  | 0.000044  | 0.000016  | -0.011276 | 0.001646  | -0.000307 | 0.001401  | 0.000465  | -0.001593 | -0.000013 |
| 42 | 0.000024  | 0.000012  | 0.000006  | -0.000010 | 0.000012  | 0.009633  | -0.001641 | -0.000290 | -0.001189 | 0.000725  | 0.002662  | -0.000013 |
| 43 | -0.000005 | 0.000012  | 0.000009  | 0.000012  | 0.000018  | 0.000077  | -0.000007 | 0.000045  | 0.000084  | 0.000069  | 0.000055  | 0.011038  |
| 44 | 0.000124  | -0.000068 | -0.000020 | -0.000010 | -0.000168 | 0.000053  | -0.000033 | -0.000034 | 0.000001  | 0.000043  | -0.000053 | -0.000353 |
| 45 | -0.004622 | 0.000312  | -0.000914 | -0.001762 | -0.004629 | -0.000075 | 0.000136  | -0.000079 | -0.000028 | -0.000067 | -0.000171 | -0.000259 |
| 46 | -0.000087 | 0.000023  | -0.000008 | 0.000052  | 0.000087  | 0.003168  | 0.005629  | -0.002042 | -0.000917 | 0.000315  | 0.004988  | 0.000172  |
| 47 | -0.000010 | 0.000059  | 0.000004  | -0.000005 | 0.000057  | 0.000417  | -0.000024 | 0.000054  | 0.000003  | -0.000018 | 0.000092  | 0.002943  |
| 48 | 0.000060  | -0.000100 | -0.000042 | 0.000034  | -0.000015 | -0.000134 | -0.000236 | 0.000134  | 0.000092  | -0.000027 | 0.000055  | 0.000014  |
| 49 | 0.000529  | -0.000085 | -0.000088 | -0.000030 | 0.000115  | -0.000034 | -0.000325 | 0.000093  | 0.000077  | 0.000024  | -0.000085 | 0.000035  |
| 50 | 0.000803  | -0.000254 | -0.000181 | -0.000075 | 0.000126  | 0.000273  | -0.000040 | 0.000020  | 0.000018  | 0.000040  | -0.000121 | -0.000027 |
| 51 | 0.000290  | -0.000128 | -0.000117 | -0.000065 | 0.000021  | -0.000154 | -0.000177 | 0.000042  | 0.000061  | 0.000051  | 0.000019  | 0.000179  |
| 52 | -0.000122 | -0.000006 | 0.000012  | 0.000105  | -0.000035 | -0.000114 | 0.000165  | 0.000024  | -0.000009 | -0.000049 | 0.000196  | 0.000229  |
| 53 | 0.000131  | -0.000028 | -0.000023 | -0.000030 | -0.000020 | -0.000234 | -0.000493 | 0.000201  | 0.000139  | 0.000001  | -0.000091 | -0.000147 |
| 54 | 0.000056  | -0.000008 | -0.000009 | -0.000004 | 0.000020  | -0.000026 | -0.000057 | 0.000013  | 0.000011  | 0.000007  | -0.000003 | -0.000024 |
| 55 | 0.000027  | 0.000016  | 0.000032  | 0.000058  | 0.000026  | -0.000070 | -0.000043 | 0.000020  | 0.000008  | -0.000014 | 0.000020  | -0.000026 |
| 56 | 0.000124  | -0.000025 | -0.000029 | -0.000026 | 0.000007  | -0.000052 | -0.000040 | 0.000005  | 0.000016  | 0.000019  | -0.000005 | -0.000020 |
| 57 | 0.000010  | -0.000004 | -0.000004 | 0.000000  | 0.000006  | -0.000007 | 0.000015  | -0.000001 | -0.000002 | -0.000004 | 0.000005  | 0.000074  |
| 58 | -0.000008 | 0.000007  | 0.000005  | -0.000002 | -0.000007 | 0.000004  | -0.000020 | 0.000019  | 0.000018  | 0.000013  | 0.000009  | 0.000017  |
| 59 | 0.000065  | -0.000024 | -0.000030 | -0.000007 | 0.000029  | -0.000065 | -0.000010 | 0.000005  | -0.000004 | 0.000004  | 0.000006  | 0.000045  |
| 60 | 0.000057  | -0.000013 | -0.000031 | -0.000062 | -0.000105 | -0.000051 | 0.000091  | 0.000018  | -0.000036 | 0.000013  | -0.000012 | -0.000019 |
| 61 | 0.001266  | -0.000815 | -0.000406 | 0.000193  | 0.000312  | -0.002463 | -0.002342 | 0.000860  | 0.000554  | -0.000286 | -0.001283 | 0.000486  |
| 62 | -0.001274 | 0.000706  | 0.000449  | -0.000169 | -0.000121 | 0.002180  | 0.001617  | -0.000692 | -0.000431 | 0.000164  | 0.000743  | -0.000048 |
| 63 | -0.001938 | 0.000425  | 0.000373  | 0.000286  | -0.000157 | -0.000355 | 0.001508  | -0.000201 | 0.000215  | 0.000365  | 0.001734  | 0.000393  |
| 64 | 0.001755  | -0.000564 | -0.000356 | -0.000222 | 0.000166  | -0.000159 | -0.001688 | 0.000364  | -0.000031 | -0.000291 | -0.001428 | -0.000185 |
| 65 | 0.001221  | -0.000341 | -0.000251 | -0.000191 | 0.000049  | -0.000836 | -0.002233 | 0.000685  | 0.000225  | -0.000160 | -0.001050 | -0.000479 |
| 66 | -0.001570 | 0.000415  | 0.000169  | 0.000158  | -0.000378 | 0.001034  | 0.002345  | -0.000623 | -0.000317 | 0.000107  | 0.001157  | -0.000766 |
| 67 | -0.000550 | 0.000770  | 0.000309  | -0.000287 | -0.000211 | 0.003609  | 0.003113  | -0.001339 | -0.000983 | 0.000084  | 0.000598  | -0.000547 |
| 68 | 0.001106  | -0.000560 | -0.000246 | 0.000249  | 0.000316  | -0.002930 | -0.002315 | 0.000963  | 0.000764  | -0.000015 | -0.000480 | 0.000832  |
| 69 | -0.000200 | -0.000320 | -0.000537 | -0.000317 | 0.000234  | -0.001091 | -0.000156 | -0.000068 | 0.000039  | 0.000264  | 0.000015  | 0.003967  |
| 70 | 0.000023  | -0.000442 | 0.000000  | 0.000271  | -0.000136 | 0.002526  | -0.000455 | -0.000195 | -0.000411 | -0.000334 | 0.000146  | -0.000776 |
| 71 | 0.000155  | 0.000533  | 0.000463  | 0.000090  | -0.000327 | 0.001131  | 0.000108  | 0.000262  | -0.000078 | -0.000479 | -0.000074 | -0.003410 |
| 72 | 0.000041  | 0.000254  | 0.000072  | -0.000051 | 0.000208  | -0.002483 | 0.000587  | -0.000028 | 0.000422  | 0.000550  | -0.000067 | 0.000131  |
| 73 | -0.000123 | -0.000072 | -0.000001 | 0.000075  | -0.000039 | 0.000390  | 0.000414  | 0.000353  | 0.000344  | -0.000088 | -0.000201 | 0.048137  |
| 74 | 0.000178  | 0.000106  | 0.000065  | -0.000076 | -0.000008 | -0.000108 | -0.000129 | -0.000099 | -0.000057 | 0.000112  | 0.000031  | 0.020226  |
| 75 | 0.000186  | 0.000064  | 0.000078  | -0.000028 | -0.000026 | 0.000173  | -0.000103 | -0.000133 | -0.000056 | 0.000119  | -0.000015 | 0.004894  |
| 76 | -0.000720 | -0.000189 | -0.000472 | -0.000281 | -0.000068 | 0.000737  | 0.000128  | 0.000046  | -0.000039 | -0.000173 | -0.000044 | -0.029704 |
| 77 | 0.003254  | 0.001620  | 0.003662  | 0.001347  | -0.001625 | -0.000107 | -0.000005 | 0.000091  | 0.000002  | -0.000041 | 0.000156  | 0.000627  |
| 78 | -0.000678 | -0.000338 | -0.000537 | -0.000025 | 0.000828  | -0.000310 | -0.000001 | -0.000078 | 0.000053  | 0.000106  | -0.000179 | -0.000143 |
| 79 | -0.002688 | -0.001133 | -0.002744 | -0.001127 | 0.001494  | -0.000100 | 0.000009  | -0.000026 | 0.000072  | 0.000056  | -0.000201 | -0.000426 |
| 80 | -0.002085 | -0.000130 | -0.002866 | 0.000800  | 0.002648  | 0.001141  | 0.000105  | -0.000324 | -0.000428 | -0.000204 | 0.000605  | -0.000287 |

|     |           |           |           |           |           |           |           |           |           |           |           |           |
|-----|-----------|-----------|-----------|-----------|-----------|-----------|-----------|-----------|-----------|-----------|-----------|-----------|
| 81  | 0.003127  | -0.000612 | 0.002569  | -0.000520 | -0.002023 | -0.026556 | 0.001823  | 0.001202  | 0.003527  | 0.001582  | -0.002946 | 0.001036  |
| 82  | 0.002302  | 0.000739  | 0.002376  | 0.000710  | -0.002557 | 0.004183  | -0.000927 | 0.000046  | -0.000518 | -0.000392 | 0.000660  | -0.000082 |
| 83  | 0.000632  | 0.000226  | 0.000608  | 0.000123  | -0.000796 | 0.017888  | -0.001794 | -0.000956 | -0.002588 | -0.001126 | 0.002521  | -0.000311 |
| 84  | -0.002517 | -0.001037 | -0.003298 | -0.001054 | 0.003103  | 0.043932  | -0.002565 | 0.000972  | -0.002688 | 0.000036  | 0.002315  | 0.000694  |
| 85  | 0.000502  | -0.000147 | 0.000242  | 0.000194  | -0.000677 | -0.041558 | 0.001804  | -0.000591 | 0.002517  | -0.000625 | -0.003034 | 0.026848  |
| 86  | -0.000088 | 0.000120  | -0.000048 | -0.000061 | 0.000199  | -0.014549 | 0.002700  | 0.000627  | 0.002314  | 0.000765  | -0.001905 | -0.005283 |
| 87  | -0.000039 | 0.000132  | -0.000047 | -0.000105 | 0.000163  | -0.004126 | 0.000941  | 0.000007  | 0.000548  | 0.000240  | -0.000650 | -0.018110 |
| 88  | 0.000065  | -0.000191 | -0.000050 | 0.000013  | -0.000212 | 0.022162  | -0.003297 | -0.000947 | -0.003229 | -0.001031 | 0.002106  | -0.046446 |
| 89  | 0.000174  | 0.000061  | 0.000112  | 0.000291  | 0.000310  | -0.000434 | -0.000041 | 0.000073  | -0.000001 | 0.000007  | 0.000123  | 0.001515  |
| 90  | 0.000679  | 0.000447  | 0.000071  | -0.000295 | 0.000682  | 0.000544  | -0.000330 | 0.000323  | 0.000136  | 0.000078  | -0.000072 | 0.000173  |
| 91  | -0.000045 | -0.000014 | -0.000063 | -0.000103 | 0.000173  | 0.000201  | -0.000986 | -0.000196 | 0.000089  | 0.000486  | -0.000782 | -0.001606 |
| 92  | -0.000053 | -0.000021 | -0.000014 | 0.000049  | 0.000011  | -0.001757 | -0.000127 | -0.000149 | -0.000060 | 0.000000  | 0.000001  | 0.000788  |
| 93  | -0.000110 | -0.000045 | -0.000032 | 0.000048  | 0.000020  | -0.000027 | 0.000032  | 0.000066  | 0.000046  | -0.000033 | 0.000022  | -0.005589 |
| 94  | -0.000068 | -0.000061 | -0.000032 | 0.000028  | -0.000012 | 0.000135  | 0.000097  | 0.000033  | 0.000011  | -0.000080 | -0.000052 | -0.014636 |
| 95  | -0.000103 | -0.000025 | -0.000030 | 0.000031  | 0.000041  | -0.000152 | 0.000038  | 0.000069  | 0.000026  | -0.000053 | 0.000016  | -0.002507 |
| 96  | -0.000084 | -0.000041 | -0.000047 | 0.000000  | -0.000014 | -0.000007 | 0.000063  | 0.000066  | 0.000028  | -0.000067 | 0.000000  | -0.002400 |
| 97  | 0.000303  | 0.000213  | 0.000321  | 0.000088  | -0.000312 | 0.000005  | -0.000025 | 0.000050  | -0.000024 | -0.000038 | 0.000124  | 0.000208  |
| 98  | 0.000379  | 0.000121  | 0.000218  | -0.000059 | -0.000512 | 0.000308  | 0.000028  | 0.000027  | -0.000030 | -0.000068 | 0.000054  | -0.000069 |
| 99  | 0.001552  | 0.000546  | 0.001593  | 0.000873  | -0.000828 | -0.000062 | -0.000052 | 0.000038  | -0.000024 | -0.000014 | 0.000128  | 0.000332  |
| 100 | 0.001123  | 0.000589  | 0.001149  | 0.000254  | -0.000686 | 0.000157  | 0.000039  | -0.000009 | -0.000046 | -0.000042 | 0.000075  | 0.000104  |
| 101 | -0.001009 | -0.000215 | -0.000973 | -0.000499 | 0.000971  | -0.001964 | 0.000381  | 0.000045  | 0.000314  | 0.000220  | -0.000322 | 0.000017  |
| 102 | -0.001266 | -0.000549 | -0.001413 | -0.000195 | 0.001599  | -0.002266 | 0.000519  | -0.000072 | 0.000219  | 0.000160  | -0.000340 | 0.000085  |
| 103 | -0.000377 | -0.000060 | -0.000257 | -0.000006 | 0.000449  | -0.012627 | 0.001055  | 0.000731  | 0.001457  | 0.000526  | -0.001492 | 0.000253  |
| 104 | -0.000254 | -0.000175 | -0.000353 | -0.000112 | 0.000349  | -0.005257 | 0.000733  | 0.000224  | 0.001130  | 0.000599  | -0.001034 | 0.000057  |
| 105 | 0.000026  | -0.000043 | 0.000039  | 0.000041  | -0.000084 | 0.003988  | -0.001069 | -0.000472 | -0.000989 | -0.000228 | 0.000841  | 0.002414  |
| 106 | 0.000063  | -0.000076 | 0.000008  | 0.000019  | -0.000115 | 0.010576  | -0.001633 | -0.000155 | -0.001329 | -0.000538 | 0.001056  | 0.002851  |
| 107 | -0.000002 | -0.000056 | 0.000024  | 0.000062  | -0.000055 | 0.002093  | -0.000516 | 0.000053  | -0.000225 | -0.000052 | 0.000397  | 0.013412  |
| 108 | 0.000041  | -0.000077 | 0.000021  | 0.000044  | -0.000108 | 0.002009  | -0.000420 | -0.000068 | -0.000314 | -0.000172 | 0.000259  | 0.004719  |
| 109 | -0.000359 | 0.000127  | -0.000166 | -0.000238 | 0.000011  | -0.000002 | -0.000134 | -0.000098 | -0.000088 | 0.000110  | 0.000155  | -0.000215 |
| 110 | 0.000193  | -0.000193 | 0.000050  | -0.000052 | -0.000317 | 0.000446  | 0.000178  | 0.000024  | 0.000086  | -0.000117 | -0.000278 | -0.001307 |
| 111 | -0.013354 | -0.003600 | -0.006465 | -0.002556 | 0.012090  | -0.000167 | 0.000114  | -0.000291 | -0.000173 | 0.000114  | 0.000191  | 0.000277  |
| 112 | 0.012715  | 0.003139  | 0.006387  | 0.002832  | -0.012839 | -0.000373 | 0.000209  | -0.000027 | 0.000031  | -0.000196 | -0.000124 | -0.000418 |
| 113 | -0.000201 | 0.000063  | -0.000037 | 0.000011  | -0.000009 | 0.030117  | -0.012075 | -0.002356 | -0.006423 | -0.003292 | 0.013512  | 0.000697  |
| 114 | 0.000243  | -0.000045 | 0.000096  | 0.000090  | -0.000168 | -0.030065 | 0.013085  | 0.002543  | 0.006326  | 0.002797  | -0.012759 | 0.000895  |
| 115 | -0.000209 | 0.000122  | -0.000099 | -0.000059 | 0.000215  | 0.000822  | -0.000042 | 0.000020  | -0.000055 | 0.000066  | 0.000171  | -0.040743 |
| 116 | 0.000265  | -0.000103 | 0.000111  | 0.000007  | -0.000231 | 0.000941  | 0.000177  | 0.000121  | 0.000113  | -0.000061 | -0.000169 | 0.040524  |
| 117 | 0.000681  | -0.000055 | -0.000045 | -0.000084 | 0.000189  | 0.000660  | 0.000258  | -0.000283 | -0.000139 | -0.000001 | -0.000336 | -0.000037 |
| 118 | 0.000493  | -0.000133 | -0.000069 | -0.000054 | 0.000075  | 0.000349  | -0.000021 | -0.000012 | 0.000004  | -0.000017 | -0.000191 | -0.000215 |
| 119 | 0.000422  | -0.000064 | -0.000056 | -0.000058 | 0.000062  | 0.000207  | -0.000107 | 0.000019  | 0.000006  | 0.000029  | -0.000138 | -0.000139 |
| 120 | 0.000091  | -0.000037 | -0.000008 | 0.000006  | -0.000016 | 0.000116  | 0.000048  | 0.000006  | -0.000002 | -0.000023 | -0.000017 | -0.000044 |
| 121 | -0.000086 | 0.000045  | 0.000018  | -0.000002 | 0.000005  | -0.000067 | -0.000053 | -0.000001 | 0.000009  | 0.000011  | 0.000003  | 0.000032  |
| 122 | -0.000007 | -0.000007 | -0.000009 | -0.000003 | 0.000012  | -0.000052 | 0.000001  | -0.000004 | -0.000006 | 0.000013  | 0.000014  | 0.000013  |
| 123 | -0.000033 | 0.000004  | 0.000017  | 0.000010  | -0.000006 | 0.000073  | 0.000042  | -0.000014 | -0.000016 | -0.000019 | -0.000016 | -0.000067 |
| 124 | 0.000054  | -0.000001 | -0.000012 | -0.000005 | 0.000026  | 0.000010  | -0.000033 | 0.000013  | 0.000007  | 0.000007  | -0.000027 | 0.000105  |
| 125 | -0.000017 | -0.000004 | -0.000007 | -0.000006 | -0.000020 | -0.000079 | -0.000003 | -0.000002 | 0.000007  | 0.000011  | 0.000043  | -0.000040 |
| 126 | 0.000332  | -0.000094 | -0.000065 | -0.000072 | 0.000023  | 0.000223  | 0.000073  | -0.000060 | -0.000029 | 0.000031  | -0.000107 | -0.000195 |
| 127 | 0.000238  | -0.000075 | -0.000048 | -0.000036 | 0.000032  | 0.000233  | 0.000145  | -0.000053 | -0.000040 | -0.000003 | -0.000065 | 0.000063  |
| 128 | 0.000003  | -0.000006 | 0.000000  | 0.000006  | -0.000001 | -0.000004 | 0.000012  | -0.000006 | -0.000003 | -0.000002 | 0.000009  | -0.000019 |
| 129 | 0.000017  | -0.000004 | -0.000004 | -0.000002 | -0.000008 | 0.000079  | -0.000007 | 0.000007  | 0.000012  | -0.000001 | -0.000021 | -0.000048 |
| 130 | 0.000091  | -0.000040 | -0.000034 | -0.000013 | 0.000020  | -0.000044 | -0.000015 | 0.000005  | 0.000004  | 0.000006  | 0.000009  | 0.000125  |

|     |           |           |           |           |           |           |           |           |           |           |           |           |
|-----|-----------|-----------|-----------|-----------|-----------|-----------|-----------|-----------|-----------|-----------|-----------|-----------|
| 131 | -0.000040 | 0.000015  | 0.000013  | 0.000007  | 0.000005  | -0.000047 | 0.000004  | 0.000002  | -0.000002 | 0.000002  | 0.000020  | 0.000107  |
| 132 | 0.000013  | -0.000013 | -0.000008 | -0.000007 | -0.000011 | 0.000052  | 0.000020  | -0.000011 | -0.000006 | -0.000007 | -0.000012 | -0.000076 |
| 133 | -0.000086 | 0.000048  | 0.000033  | 0.000010  | -0.000004 | -0.000036 | -0.000013 | 0.000003  | -0.000004 | 0.000001  | -0.000004 | -0.000088 |
| 134 | 0.000121  | 0.000063  | 0.000080  | -0.000019 | 0.000171  | 0.000823  | -0.000207 | 0.000041  | -0.000161 | -0.000027 | 0.000035  | -0.000688 |
| 135 | -0.000020 | -0.000020 | 0.000162  | 0.000066  | 0.000110  | 0.000501  | -0.000123 | 0.000211  | 0.000004  | -0.000271 | -0.000069 | -0.011248 |
| 136 | -0.000045 | -0.000032 | 0.000161  | 0.000147  | 0.000157  | -0.000057 | -0.000113 | 0.000116  | 0.000073  | -0.000074 | 0.000158  | 0.000310  |
| 137 | -0.000047 | -0.000054 | 0.000023  | 0.000150  | 0.000050  | 0.000497  | -0.000082 | 0.000081  | -0.000046 | -0.000050 | 0.000045  | -0.000525 |
| 138 | 0.000086  | -0.000142 | 0.000042  | 0.000297  | 0.000299  | 0.000392  | -0.000076 | 0.000035  | -0.000097 | 0.000030  | 0.000074  | -0.002596 |
| 139 | 0.000627  | -0.000656 | 0.000037  | 0.000730  | 0.000334  | -0.000124 | 0.000313  | -0.000081 | 0.000006  | 0.000044  | 0.000062  | -0.000339 |
| 140 | 0.000222  | -0.000573 | 0.000134  | 0.000651  | 0.000632  | 0.000335  | 0.000163  | -0.000061 | -0.000128 | 0.000077  | -0.000040 | -0.000617 |
| 141 | 0.000411  | -0.000467 | 0.000224  | 0.000527  | 0.000459  | 0.000372  | 0.000241  | -0.000140 | -0.000145 | 0.000052  | -0.000080 | -0.000515 |
| 142 | 0.000722  | -0.000135 | 0.000131  | -0.000022 | 0.001050  | 0.000284  | 0.000220  | -0.000138 | -0.000127 | 0.000008  | -0.000132 | -0.000547 |
| 143 | 0.001408  | 0.000413  | 0.001631  | -0.000436 | 0.002353  | 0.000393  | 0.000301  | -0.000217 | -0.000067 | 0.000060  | -0.000075 | -0.000592 |
| 144 | 0.000017  | -0.000019 | -0.000954 | -0.000423 | -0.000455 | -0.000878 | 0.000414  | -0.000725 | 0.000158  | 0.000736  | -0.000204 | -0.001738 |
| 145 | -0.001086 | -0.000357 | 0.000374  | 0.000567  | -0.001189 | 0.003522  | 0.000740  | -0.000953 | -0.000522 | 0.000460  | -0.000163 | -0.001393 |
| 146 | -0.000701 | 0.000690  | 0.000308  | -0.000431 | -0.000381 | 0.001361  | 0.000723  | -0.000496 | -0.000418 | 0.000348  | 0.000069  | -0.000566 |
| 147 | -0.000272 | 0.001261  | 0.000343  | -0.000930 | -0.000342 | -0.000493 | 0.000988  | 0.000172  | 0.000141  | 0.000107  | 0.000923  | 0.000185  |
| 148 | -0.000205 | 0.000404  | -0.000177 | -0.000432 | -0.000245 | 0.005261  | 0.000898  | 0.001134  | -0.000477 | -0.000171 | 0.001131  | -0.000900 |
| 149 | -0.000103 | 0.000046  | 0.000023  | 0.000096  | -0.000035 | -0.001357 | -0.000329 | 0.000616  | 0.000048  | -0.000839 | -0.000438 | 0.001944  |
| 150 | 0.000003  | 0.000118  | -0.000179 | -0.000155 | -0.000101 | 0.010503  | -0.000361 | -0.000588 | -0.001447 | -0.000067 | -0.001419 | -0.001199 |
| 151 | 0.000147  | 0.000070  | -0.000080 | -0.000129 | -0.000050 | 0.001583  | -0.000242 | 0.000012  | -0.000423 | -0.000145 | -0.000759 | -0.001790 |
| 152 | -0.000010 | 0.000067  | 0.000061  | -0.000018 | 0.000034  | 0.001277  | -0.000288 | 0.000412  | -0.000465 | -0.000835 | -0.000290 | -0.001240 |
| 153 | -0.000072 | 0.000046  | 0.000120  | 0.000059  | 0.000089  | 0.000008  | -0.000004 | 0.000567  | -0.000118 | -0.000641 | -0.000384 | -0.010234 |
| 154 | 0.000390  | -0.000256 | -0.000175 | 0.000078  | 0.000200  | 0.000482  | 0.000109  | -0.000040 | -0.000104 | 0.000001  | 0.000030  | -0.000336 |
| 155 | -0.001141 | 0.000421  | 0.000201  | 0.000518  | 0.001918  | -0.000083 | 0.000198  | -0.000144 | 0.000156  | 0.000122  | 0.000163  | -0.000918 |
| 156 | -0.000183 | 0.000232  | -0.000247 | -0.000119 | -0.000255 | 0.015712  | 0.001445  | -0.000565 | -0.000557 | -0.000583 | -0.001786 | -0.000858 |
| 157 | -0.000059 | 0.000078  | 0.000084  | 0.000087  | 0.000183  | -0.000207 | -0.000237 | 0.000247  | 0.000051  | -0.000186 | -0.000098 | -0.018974 |
| 158 | -0.000142 | 0.000048  | 0.000042  | 0.000013  | 0.000015  | 0.000266  | 0.000376  | -0.000136 | -0.000086 | -0.000041 | 0.000095  | 0.000083  |
| 159 | 0.000490  | -0.000165 | -0.000231 | -0.000159 | -0.000020 | 0.000669  | 0.001030  | -0.000415 | -0.000369 | -0.000088 | 0.000027  | -0.000095 |
| 160 | 0.000525  | -0.000202 | -0.000230 | -0.000160 | -0.000045 | 0.000551  | 0.000787  | -0.000332 | -0.000295 | -0.000083 | -0.000002 | -0.000254 |
| 161 | 0.000233  | -0.000110 | -0.000085 | -0.000027 | 0.000040  | -0.000306 | -0.000250 | 0.000073  | 0.000054  | 0.000003  | -0.000019 | 0.000080  |
| 162 | 0.000036  | 0.000000  | -0.000035 | -0.000077 | -0.000127 | -0.000254 | -0.000001 | 0.000001  | 0.000128  | 0.000183  | 0.000519  | -0.000075 |
| 163 | 0.001290  | -0.000511 | -0.000372 | -0.000120 | 0.000059  | -0.001509 | -0.001519 | 0.000477  | 0.000370  | 0.000075  | -0.000229 | 0.000036  |
| 164 | -0.000101 | -0.000023 | 0.000238  | 0.000177  | 0.000189  | -0.000058 | -0.000194 | 0.000220  | 0.000101  | -0.000142 | 0.000240  | 0.005053  |
| 165 | -0.000037 | 0.000010  | -0.000030 | -0.000037 | -0.000061 | 0.000291  | 0.000021  | 0.000009  | -0.000024 | -0.000051 | -0.000076 | -0.004755 |
| 166 | 0.000054  | 0.000096  | -0.000069 | -0.000281 | -0.000132 | -0.000636 | 0.000111  | -0.000107 | 0.000056  | 0.000034  | -0.000133 | -0.004826 |
| 167 | 0.000246  | -0.000430 | -0.000697 | 0.000023  | -0.000818 | 0.000658  | 0.000401  | -0.000199 | -0.000242 | 0.000056  | -0.000167 | -0.000874 |
| 168 | -0.000409 | 0.000194  | -0.000919 | -0.000725 | -0.001189 | 0.000042  | -0.000020 | 0.000014  | -0.000001 | -0.000011 | -0.000035 | -0.000091 |
| 169 | -0.000463 | -0.000679 | 0.001366  | 0.002055  | 0.001517  | -0.000701 | -0.000440 | 0.000274  | 0.000209  | 0.000000  | 0.000246  | 0.001042  |
| 170 | 0.000349  | 0.001758  | 0.000998  | -0.001276 | 0.000490  | 0.005284  | 0.001439  | -0.000458 | -0.001061 | -0.000072 | -0.000562 | 0.000317  |
| 171 | -0.000544 | 0.001484  | 0.000744  | -0.000841 | -0.000063 | -0.001362 | -0.000812 | 0.000695  | 0.000597  | -0.000434 | -0.000177 | 0.000444  |
| 172 | -0.000367 | -0.000496 | 0.000281  | 0.000470  | 0.000353  | 0.006577  | 0.001595  | -0.002204 | -0.001826 | 0.000537  | -0.000602 | 0.000024  |
| 173 | 0.000220  | 0.000109  | -0.000142 | -0.000215 | -0.000122 | 0.000879  | -0.000030 | -0.001185 | 0.000158  | 0.001519  | 0.000240  | 0.001069  |
| 174 | -0.000065 | 0.000020  | -0.000003 | 0.000003  | 0.000033  | 0.003436  | -0.000302 | 0.000304  | -0.000675 | -0.000801 | -0.000354 | 0.003422  |
| 175 | -0.000003 | -0.000107 | -0.000103 | 0.000026  | -0.000075 | 0.002288  | 0.000115  | -0.000245 | -0.000040 | 0.000445  | -0.000250 | -0.000294 |
| 176 | -0.000170 | 0.000211  | -0.000479 | -0.000379 | -0.000502 | 0.000874  | 0.000072  | -0.000126 | -0.000259 | 0.000059  | -0.000300 | -0.002257 |
| 177 | 0.000324  | 0.000305  | -0.000415 | -0.000870 | -0.001049 | 0.000109  | 0.000071  | -0.000070 | -0.000049 | -0.000043 | -0.000115 | -0.000535 |
| 178 | -0.000231 | 0.000638  | 0.004342  | 0.002717  | 0.003322  | -0.000829 | -0.000425 | 0.000334  | 0.000180  | -0.000228 | 0.000083  | 0.000793  |
| 179 | 0.000748  | -0.002002 | -0.003464 | -0.000794 | -0.001144 | -0.001992 | -0.000937 | 0.000653  | 0.000630  | -0.000134 | 0.000656  | 0.000680  |
| 180 | 0.000357  | 0.000147  | -0.000240 | -0.000498 | -0.000279 | 0.009879  | 0.001948  | -0.002212 | -0.003345 | -0.000326 | 0.000320  | 0.002290  |

|     |           |           |           |           |           |           |           |           |           |           |           |           |
|-----|-----------|-----------|-----------|-----------|-----------|-----------|-----------|-----------|-----------|-----------|-----------|-----------|
| 181 | -0.000337 | 0.000144  | 0.000245  | 0.000060  | 0.000085  | -0.008083 | -0.000171 | 0.000403  | 0.002832  | 0.002025  | -0.000094 | 0.002959  |
| 182 | -0.000351 | -0.000075 | 0.000297  | 0.000251  | 0.000109  | 0.002672  | -0.000281 | 0.000402  | 0.000042  | -0.000565 | 0.000015  | -0.009310 |
| 183 | -0.000042 | -0.000055 | -0.000214 | 0.000089  | -0.000114 | 0.001782  | -0.000118 | 0.000239  | -0.000371 | -0.000276 | -0.000194 | 0.012622  |
| 184 | 0.000801  | -0.000306 | -0.000339 | -0.000158 | 0.000029  | 0.000070  | 0.000245  | -0.000169 | -0.000200 | -0.000070 | -0.000119 | -0.000027 |
| 185 | 0.000331  | -0.000101 | -0.000198 | -0.000172 | -0.000102 | 0.000978  | 0.001217  | -0.000469 | -0.000416 | -0.000091 | 0.000038  | -0.000249 |
| 186 | -0.000147 | 0.000072  | 0.000071  | 0.000030  | -0.000011 | 0.000150  | 0.000078  | -0.000030 | -0.000006 | -0.000011 | 0.000005  | -0.000049 |
| 187 | -0.000418 | 0.000121  | 0.000198  | 0.000177  | 0.000126  | -0.000965 | -0.001046 | 0.000431  | 0.000376  | 0.000095  | 0.000038  | 0.000440  |
| 188 | -0.000572 | 0.000216  | 0.000273  | 0.000127  | -0.000036 | -0.000253 | -0.000527 | 0.000249  | 0.000258  | 0.000079  | 0.000036  | -0.000101 |
| 189 | -0.000021 | 0.000020  | 0.000015  | 0.000009  | 0.000003  | -0.000047 | -0.000006 | 0.000010  | 0.000005  | 0.000008  | 0.000023  | 0.000030  |
| 190 | 0.000091  | -0.000008 | -0.000052 | -0.000127 | -0.000174 | 0.000148  | -0.000002 | -0.000040 | -0.000002 | 0.000023  | -0.000056 | -0.000432 |
| 191 | 0.000208  | -0.000081 | -0.000071 | -0.000124 | -0.000169 | -0.000031 | -0.000008 | -0.000005 | 0.000010  | 0.000018  | -0.000035 | -0.000331 |
| 192 | -0.000044 | 0.000029  | -0.000005 | -0.000016 | 0.000032  | -0.000056 | -0.000019 | 0.000016  | 0.000009  | 0.000003  | 0.000034  | 0.000128  |
| 193 | -0.000067 | 0.000005  | -0.000015 | -0.000001 | -0.000020 | -0.000196 | -0.000045 | 0.000021  | 0.000005  | 0.000028  | 0.000023  | 0.000141  |
| 194 | 0.000056  | -0.000022 | -0.000046 | -0.000074 | -0.000080 | 0.000146  | -0.000042 | -0.000019 | 0.000000  | 0.000033  | -0.000049 | -0.000188 |
| 195 | -0.000018 | 0.000004  | -0.000035 | -0.000034 | -0.000053 | -0.000126 | -0.000060 | -0.000011 | 0.000015  | 0.000036  | -0.000015 | 0.000339  |
| 196 | 0.000034  | -0.000009 | -0.000016 | -0.000025 | -0.000037 | 0.000059  | 0.000012  | -0.000003 | 0.000003  | -0.000003 | -0.000013 | 0.000032  |
| 197 | 0.000038  | -0.000020 | -0.000033 | -0.000031 | -0.000002 | -0.000067 | -0.000031 | 0.000009  | 0.000007  | 0.000022  | 0.000008  | 0.000023  |
| 198 | 0.000007  | -0.000008 | -0.000008 | -0.000010 | -0.000002 | -0.000032 | -0.000016 | 0.000001  | -0.000002 | 0.000006  | 0.000000  | -0.000058 |
| 199 | -0.000011 | 0.000009  | 0.000003  | 0.000004  | 0.000008  | -0.000016 | -0.000016 | 0.000003  | 0.000007  | 0.000016  | -0.000003 | 0.000045  |
| 200 | -0.000013 | 0.000010  | -0.000002 | -0.000001 | -0.000015 | -0.000057 | -0.000016 | 0.000011  | 0.000014  | 0.000015  | 0.000014  | 0.000080  |
| 201 | 0.001030  | -0.003762 | -0.001726 | -0.002286 | -0.006044 | -0.000122 | 0.000040  | -0.000064 | -0.000007 | -0.000015 | -0.000049 | -0.000247 |
| 202 | 0.001554  | -0.002715 | -0.000930 | -0.001415 | -0.006465 | 0.000005  | 0.000045  | -0.000089 | -0.000081 | -0.000036 | -0.000112 | 0.000115  |
| 203 | 0.001833  | 0.000700  | 0.001063  | -0.000428 | -0.000980 | -0.000146 | -0.000020 | -0.000011 | -0.000031 | 0.000002  | 0.000008  | 0.000239  |
| 204 | 0.002492  | 0.000718  | 0.001453  | -0.000615 | 0.003099  | -0.000186 | -0.000046 | -0.000009 | -0.000001 | 0.000016  | 0.000029  | 0.000090  |
| 205 | -0.004333 | 0.000380  | 0.000076  | 0.004094  | 0.007158  | 0.000103  | 0.000139  | -0.000092 | -0.000044 | -0.000066 | -0.000073 | 0.000024  |
| 206 | -0.003452 | 0.000346  | 0.000992  | 0.004458  | 0.001710  | 0.000259  | 0.000184  | -0.000116 | -0.000084 | -0.000056 | -0.000138 | 0.000002  |
| 207 | -0.000351 | 0.000031  | 0.000381  | 0.000490  | -0.000673 | 0.000068  | 0.000015  | 0.000000  | -0.000004 | -0.000020 | -0.000020 | 0.000019  |
| 208 | 0.000052  | -0.000320 | -0.000351 | -0.000084 | -0.000119 | -0.000028 | -0.000013 | -0.000012 | -0.000013 | -0.000012 | -0.000033 | 0.000044  |
| 209 | 0.000016  | -0.000080 | 0.000166  | 0.000479  | -0.000021 | 0.000022  | -0.000009 | -0.000017 | -0.000016 | -0.000007 | -0.000028 | 0.000008  |
| 210 | 0.000205  | -0.000573 | 0.000134  | 0.000007  | 0.000030  | 0.000018  | 0.000024  | -0.000036 | -0.000024 | -0.000011 | -0.000015 | 0.000080  |
| 211 | -0.001456 | -0.000138 | -0.000232 | 0.000168  | -0.000470 | 0.000057  | 0.000056  | -0.000024 | -0.000005 | 0.000003  | 0.000017  | 0.000019  |
| 212 | 0.000043  | 0.000021  | 0.000005  | 0.000004  | 0.000009  | -0.001616 | -0.001692 | 0.004259  | 0.000834  | 0.000663  | 0.004445  | -0.000174 |
| 213 | 0.000075  | 0.000046  | 0.000042  | 0.000005  | 0.000082  | -0.001303 | -0.006635 | 0.003596  | 0.000736  | 0.000856  | 0.005072  | -0.000085 |
| 214 | 0.000003  | 0.000004  | 0.000018  | 0.000016  | 0.000030  | -0.001208 | -0.003008 | -0.000695 | 0.001425  | 0.000559  | -0.001893 | 0.000165  |
| 215 | -0.000056 | 0.000039  | 0.000034  | 0.000040  | 0.000053  | -0.002284 | 0.000573  | -0.000585 | 0.000510  | 0.000801  | -0.003399 | -0.000018 |
| 216 | -0.000143 | 0.000110  | 0.000075  | 0.000077  | 0.000094  | -0.000228 | 0.006248  | -0.001222 | -0.001019 | -0.003512 | -0.003283 | -0.000073 |
| 217 | -0.000026 | 0.000042  | 0.000040  | 0.000014  | 0.000057  | 0.004915  | 0.006637  | -0.002115 | -0.002449 | -0.004215 | -0.000512 | 0.000036  |
| 218 | 0.000029  | -0.000022 | 0.000000  | 0.000004  | 0.000014  | 0.000915  | 0.000385  | 0.000119  | -0.000263 | -0.000300 | 0.000714  | -0.000108 |
| 219 | -0.000002 | 0.000014  | 0.000013  | 0.000015  | 0.000039  | 0.000380  | -0.000010 | 0.000005  | 0.000055  | -0.000723 | -0.000325 | -0.000031 |
| 220 | 0.000008  | 0.000016  | 0.000016  | 0.000015  | 0.000021  | -0.000020 | -0.000013 | 0.000430  | 0.000148  | -0.000161 | 0.000023  | -0.000030 |
| 221 | -0.000044 | 0.000045  | 0.000029  | 0.000015  | 0.000017  | 0.000110  | -0.000099 | 0.000197  | -0.000306 | -0.000215 | -0.000130 | -0.000004 |
| 222 | -0.000023 | 0.000016  | 0.000008  | -0.000013 | -0.000019 | -0.001481 | 0.000675  | 0.000498  | 0.000432  | -0.000041 | 0.000294  | -0.000085 |
| 223 | -0.000022 | 0.000040  | 0.000025  | 0.000003  | 0.000071  | -0.000125 | -0.000127 | 0.000029  | 0.000061  | 0.000121  | 0.000124  | -0.002820 |
| 224 | 0.000003  | 0.000050  | -0.000010 | 0.000002  | 0.000075  | 0.000202  | -0.000061 | 0.000048  | 0.000031  | 0.000052  | 0.000018  | 0.002057  |
| 225 | -0.000010 | 0.000018  | -0.000006 | 0.000014  | 0.000018  | -0.000019 | -0.000022 | -0.000003 | 0.000006  | 0.000051  | -0.000010 | -0.003022 |
| 226 | -0.000023 | 0.000000  | 0.000023  | 0.000015  | 0.000012  | 0.000014  | 0.000002  | 0.000020  | 0.000035  | 0.000016  | 0.000046  | -0.002071 |
| 227 | 0.000008  | 0.000029  | 0.000031  | 0.000009  | 0.000035  | 0.000108  | -0.000033 | 0.000019  | 0.000073  | 0.000071  | 0.000067  | 0.001129  |
| 228 | 0.000030  | 0.000029  | -0.000009 | -0.000030 | 0.000013  | 0.000033  | -0.000034 | 0.000011  | 0.000020  | 0.000070  | 0.000088  | 0.003879  |
| 229 | -0.000023 | 0.000012  | 0.000012  | 0.000010  | 0.000016  | -0.000014 | -0.000027 | 0.000003  | 0.000004  | 0.000007  | 0.000004  | 0.001116  |
| 230 | 0.000002  | 0.000022  | 0.000009  | 0.000003  | 0.000030  | -0.000037 | -0.000065 | 0.000027  | 0.000028  | 0.000034  | 0.000003  | -0.000070 |

|     |           |           |           |            |           |           |           |           |           |           |           |           |
|-----|-----------|-----------|-----------|------------|-----------|-----------|-----------|-----------|-----------|-----------|-----------|-----------|
| 231 | 0.000001  | 0.000006  | 0.000005  | 0.000002   | 0.000013  | -0.000014 | -0.000022 | 0.000012  | 0.000007  | 0.000017  | -0.000005 | 0.000305  |
| 232 | -0.000003 | 0.000019  | 0.000004  | 0.000005   | 0.000021  | -0.000031 | -0.000017 | 0.000013  | 0.000019  | 0.000034  | 0.000025  | 0.000142  |
| 233 | -0.000004 | 0.000001  | 0.000006  | 0.000001   | -0.000004 | 0.000058  | 0.000037  | -0.000017 | -0.000004 | -0.000003 | 0.000006  | -0.002010 |
| 234 | -0.000107 | -0.000010 | -0.000074 | 0.000001   | 0.000000  | -0.000109 | -0.000147 | -0.000056 | -0.000019 | 0.000095  | -0.000057 | 0.000363  |
| 235 | 0.000484  | -0.000116 | -0.000070 | -0.0000214 | -0.000181 | 0.000073  | 0.000016  | -0.000039 | 0.000014  | 0.000005  | -0.000069 | -0.000695 |
| 236 | -0.000042 | 0.000030  | 0.000060  | 0.000039   | -0.000029 | 0.000241  | 0.000110  | 0.000005  | -0.000001 | -0.000063 | -0.000004 | -0.000194 |
| 237 | -0.000039 | 0.000015  | 0.000025  | 0.000022   | 0.000019  | 0.000005  | 0.000049  | 0.000031  | 0.000007  | -0.000034 | 0.000034  | 0.000074  |
| 238 | -0.000015 | -0.000002 | -0.000014 | 0.000005   | 0.000022  | -0.000070 | -0.000022 | 0.000003  | 0.000002  | 0.000017  | 0.000014  | 0.000043  |
| 239 | -0.000054 | 0.000020  | 0.000012  | 0.000024   | 0.000028  | -0.000081 | -0.000012 | 0.000011  | -0.000002 | 0.000005  | 0.000024  | 0.000060  |
| 240 | 0.000050  | -0.000022 | -0.000024 | -0.000030  | 0.000000  | -0.000070 | -0.000028 | -0.000004 | -0.000003 | 0.000011  | -0.000005 | -0.000040 |
| 241 | 0.000054  | -0.000022 | -0.000020 | -0.000026  | 0.000000  | -0.000060 | -0.000030 | -0.000003 | -0.000003 | 0.000012  | -0.000005 | -0.000042 |
| 242 | -0.000007 | 0.000005  | 0.000020  | 0.000020   | 0.000003  | 0.000089  | 0.000037  | 0.000003  | 0.000005  | -0.000019 | -0.000002 | 0.000019  |
| 243 | 0.000001  | 0.000002  | 0.000016  | 0.000013   | 0.000001  | 0.000070  | 0.000015  | 0.000000  | 0.000003  | -0.000004 | -0.000009 | 0.000052  |
| 244 | -0.000138 | 0.000042  | 0.000023  | 0.000054   | 0.000060  | 0.000034  | 0.000011  | 0.000019  | -0.000003 | -0.000013 | 0.000018  | 0.000177  |
| 245 | -0.000187 | 0.000058  | 0.000046  | 0.000090   | 0.000077  | -0.000123 | 0.000000  | 0.000031  | 0.000000  | -0.000012 | 0.000061  | 0.000184  |
| 246 | -0.002346 | -0.000636 | 0.000508  | 0.000927   | 0.003961  | 0.000124  | 0.000176  | -0.000052 | 0.000014  | -0.000085 | -0.000100 | -0.000174 |
| 247 | -0.000315 | -0.002012 | -0.003342 | -0.000855  | -0.001205 | -0.000099 | 0.000032  | -0.000172 | -0.000152 | -0.000030 | -0.000235 | 0.000152  |
| 248 | 0.000824  | -0.000126 | 0.000251  | 0.001460   | -0.005195 | 0.000140  | -0.000027 | 0.000056  | 0.000021  | 0.000031  | 0.000069  | -0.000088 |
| 249 | 0.001451  | 0.000997  | -0.000333 | 0.001290   | -0.004677 | 0.000008  | -0.000047 | 0.000025  | 0.000002  | 0.000031  | 0.000062  | 0.000021  |
| 250 | 0.000800  | -0.000501 | 0.000962  | -0.003453  | 0.000971  | -0.000124 | -0.000040 | 0.000020  | 0.000021  | 0.000007  | 0.000017  | -0.000014 |
| 251 | 0.000808  | -0.000350 | 0.000216  | -0.002886  | 0.001426  | -0.000128 | -0.000053 | 0.000042  | 0.000040  | 0.000020  | 0.000045  | 0.000027  |
| 252 | 0.000484  | -0.000572 | -0.000154 | 0.001092   | -0.000024 | -0.000020 | -0.000002 | -0.000016 | -0.000017 | -0.000011 | -0.000027 | 0.000086  |
| 253 | 0.000340  | -0.000385 | -0.000870 | 0.001579   | 0.000749  | -0.000019 | 0.000002  | -0.000023 | -0.000023 | -0.000017 | -0.000032 | 0.000070  |
| 254 | 0.000112  | 0.001413  | 0.001068  | 0.000775   | 0.000724  | 0.000001  | -0.000005 | 0.000003  | -0.000011 | 0.000010  | 0.000008  | 0.000047  |
| 255 | -0.000382 | 0.001849  | 0.000166  | 0.001078   | 0.001069  | 0.000032  | 0.000026  | -0.000022 | -0.000025 | 0.000003  | -0.000015 | 0.000049  |
| 256 | -0.000962 | 0.000186  | 0.001069  | -0.000163  | 0.002796  | 0.000001  | -0.000033 | 0.000058  | 0.000053  | 0.000019  | 0.000098  | -0.000004 |
| 257 | -0.000387 | -0.000260 | 0.000894  | 0.000629   | 0.001721  | 0.000086  | -0.000029 | 0.000082  | 0.000076  | 0.000022  | 0.000107  | -0.000176 |
| 258 | -0.000353 | 0.000144  | 0.000105  | 0.000136   | 0.000165  | 0.021469  | 0.002379  | -0.000920 | -0.003456 | -0.001802 | -0.000771 | -0.000324 |
| 259 | 0.000197  | 0.000080  | 0.000016  | -0.000055  | 0.000102  | -0.012759 | -0.003763 | 0.000814  | 0.001727  | -0.000411 | 0.002038  | 0.000438  |
| 260 | 0.000158  | -0.000120 | -0.000066 | -0.000074  | -0.000153 | -0.002912 | -0.001860 | 0.000821  | 0.000798  | -0.000763 | 0.002254  | -0.000057 |
| 261 | 0.000102  | -0.000059 | -0.000032 | -0.000049  | -0.000071 | -0.001755 | -0.002944 | 0.000037  | 0.001133  | -0.000325 | 0.002477  | 0.000024  |
| 262 | -0.000025 | 0.000007  | -0.000002 | 0.000017   | 0.000035  | -0.001887 | -0.001012 | 0.000919  | -0.000242 | 0.002728  | -0.000296 | -0.000046 |
| 263 | -0.000023 | -0.000014 | -0.000009 | 0.000006   | -0.000010 | -0.001463 | -0.000786 | 0.000599  | 0.000564  | 0.002091  | -0.001001 | -0.000027 |
| 264 | -0.000019 | 0.000033  | 0.000022  | 0.000021   | 0.000045  | 0.001382  | -0.000709 | 0.001115  | -0.000139 | -0.000832 | -0.000621 | 0.000043  |
| 265 | -0.000018 | 0.000038  | 0.000027  | 0.000024   | 0.000049  | 0.001449  | -0.000047 | 0.000674  | 0.000625  | -0.001078 | -0.000953 | 0.000034  |
| 266 | 0.000020  | -0.000019 | -0.000011 | -0.000021  | -0.000020 | -0.000185 | -0.001347 | -0.002242 | -0.000303 | -0.000415 | -0.000604 | 0.000105  |
| 267 | -0.000041 | 0.000023  | 0.000014  | -0.000006  | 0.000001  | 0.000380  | -0.000809 | -0.002892 | 0.000488  | -0.000665 | -0.000570 | 0.000087  |
| 268 | -0.000021 | -0.000036 | -0.000017 | 0.000012   | -0.000053 | -0.003881 | 0.003834  | 0.001167  | -0.000649 | 0.000825  | -0.002134 | -0.000119 |
| 269 | 0.000023  | -0.000078 | -0.000048 | -0.000012  | -0.000089 | -0.001105 | 0.005051  | 0.001064  | -0.000457 | -0.000175 | -0.000115 | -0.000160 |
| 270 | 0.000050  | 0.000014  | 0.000072  | -0.000033  | 0.000010  | 0.000078  | -0.000077 | 0.000073  | 0.000154  | 0.000053  | 0.000153  | 0.025341  |
| 271 | 0.000034  | 0.000098  | -0.000080 | -0.000042  | 0.000138  | 0.000030  | -0.000242 | 0.000052  | -0.000018 | 0.000149  | 0.000021  | -0.017017 |
| 272 | -0.000056 | -0.000015 | -0.000019 | 0.000026   | -0.000009 | -0.000309 | 0.000052  | -0.000036 | -0.000075 | -0.000035 | 0.000002  | -0.005716 |
| 273 | -0.000038 | -0.000009 | -0.000016 | 0.000024   | -0.000006 | -0.000157 | 0.000049  | -0.000019 | -0.000049 | -0.000025 | -0.000038 | -0.003260 |
| 274 | 0.000028  | -0.000012 | 0.000009  | -0.000005  | -0.000018 | 0.000172  | -0.000006 | 0.000003  | 0.000019  | -0.000012 | -0.000035 | 0.000661  |
| 275 | 0.000016  | -0.000021 | 0.000013  | -0.000003  | -0.000038 | 0.000191  | 0.000054  | -0.000020 | 0.000003  | -0.000034 | -0.000038 | 0.000962  |
| 276 | -0.000001 | 0.000016  | 0.000000  | 0.000001   | 0.000027  | 0.000068  | -0.000021 | 0.000021  | 0.000023  | 0.000017  | -0.000006 | 0.001453  |
| 277 | -0.000002 | 0.000014  | 0.000001  | 0.000000   | 0.000026  | 0.000026  | -0.000029 | 0.000020  | 0.000016  | 0.000013  | 0.000001  | 0.001158  |
| 278 | -0.000015 | 0.000000  | -0.000016 | 0.000004   | 0.000001  | -0.000199 | -0.000019 | 0.000000  | -0.000023 | 0.000004  | 0.000019  | -0.002703 |
| 279 | -0.000007 | 0.000013  | -0.000010 | -0.000002  | 0.000017  | -0.000195 | -0.000030 | 0.000005  | -0.000013 | 0.000024  | 0.000042  | -0.001618 |
| 280 | 0.000000  | -0.000043 | 0.000025  | 0.000019   | -0.000063 | 0.000171  | 0.000120  | -0.000047 | -0.000006 | -0.000060 | -0.000062 | -0.001426 |

|     |           |           |           |           |           |           |           |           |           |           |           |           |
|-----|-----------|-----------|-----------|-----------|-----------|-----------|-----------|-----------|-----------|-----------|-----------|-----------|
| 281 | -0.000009 | -0.000055 | 0.000021  | 0.000011  | -0.000086 | 0.000123  | 0.000151  | -0.000052 | -0.000030 | -0.000093 | -0.000058 | 0.000898  |
| 282 | 0.000200  | -0.000105 | 0.000053  | 0.000048  | -0.000194 | 0.000337  | 0.000132  | 0.000020  | 0.000049  | -0.000087 | -0.000193 | -0.000645 |
| 283 | 0.000053  | -0.000015 | -0.000003 | -0.000025 | -0.000074 | 0.000186  | 0.000048  | -0.000011 | 0.000009  | -0.000029 | -0.000066 | -0.000191 |
| 284 | -0.000008 | 0.000016  | 0.000006  | 0.000012  | 0.000028  | -0.000081 | -0.000028 | 0.000005  | 0.000002  | 0.000021  | 0.000030  | 0.000062  |
| 285 | -0.000008 | 0.000013  | 0.000023  | 0.000025  | 0.000024  | 0.000039  | 0.000007  | 0.000000  | 0.000005  | 0.000001  | 0.000001  | -0.000038 |
| 286 | -0.000048 | 0.000027  | 0.000024  | 0.000042  | 0.000053  | 0.000028  | 0.000001  | 0.000001  | -0.000002 | 0.000002  | 0.000011  | 0.000026  |
| 287 | -0.000091 | 0.000045  | 0.000021  | 0.000039  | 0.000079  | -0.000081 | -0.000031 | 0.000001  | 0.000000  | 0.000023  | 0.000042  | 0.000181  |
| 288 | -0.010493 | -0.007043 | -0.037631 | -0.006636 | 0.009313  | -0.000136 | -0.000076 | -0.000043 | -0.000008 | 0.000113  | 0.000201  | 0.000243  |
| 289 | 0.251864  | 0.000688  | -0.005416 | -0.025095 | -0.006083 | -0.000132 | -0.000107 | 0.000050  | 0.000024  | 0.000032  | 0.000048  | 0.000177  |
| 290 | 0.000688  | 0.246807  | 0.000978  | 0.007975  | 0.025728  | 0.000055  | 0.000074  | -0.000050 | -0.000029 | -0.000032 | -0.000045 | -0.000074 |
| 291 | -0.005416 | 0.000978  | 0.247615  | 0.000424  | 0.005729  | -0.000017 | 0.000031  | -0.000036 | -0.000030 | -0.000022 | -0.000026 | 0.000039  |
| 292 | -0.025095 | 0.007975  | 0.000424  | 0.248081  | -0.001049 | -0.000041 | -0.000001 | -0.000012 | -0.000017 | -0.000020 | -0.000021 | 0.000014  |
| 293 | -0.006083 | 0.025728  | 0.005729  | -0.001049 | 0.254068  | 0.000133  | 0.000033  | -0.000031 | -0.000028 | -0.000054 | -0.000134 | -0.000159 |
| 294 | -0.000132 | 0.000055  | -0.000017 | -0.000041 | 0.000133  | 0.336497  | -0.009444 | -0.006639 | -0.037520 | -0.006544 | 0.011210  | 0.000293  |
| 295 | -0.000107 | 0.000074  | 0.000031  | -0.000001 | 0.000033  | -0.009444 | 0.250452  | 0.001323  | -0.005174 | -0.025465 | -0.006332 | 0.000137  |
| 296 | 0.000050  | -0.000050 | -0.000036 | -0.000012 | -0.000031 | -0.006639 | 0.001323  | 0.246262  | 0.000705  | 0.007860  | 0.025410  | 0.000032  |
| 297 | 0.000024  | -0.000029 | -0.000030 | -0.000017 | -0.000028 | -0.037520 | -0.005174 | 0.000705  | 0.247449  | 0.000870  | 0.005916  | -0.000003 |
| 298 | 0.000032  | -0.000032 | -0.000022 | -0.000020 | -0.000054 | -0.006544 | -0.025465 | 0.007860  | 0.000870  | 0.248630  | -0.000773 | -0.000066 |
| 299 | 0.000048  | -0.000045 | -0.000026 | -0.000021 | -0.000134 | 0.011210  | -0.006332 | 0.025410  | 0.005916  | -0.000773 | 0.254687  | -0.000211 |
| 300 | 0.000177  | -0.000074 | 0.000039  | 0.000014  | -0.000159 | 0.000293  | 0.000137  | 0.000032  | -0.000003 | -0.000066 | -0.000211 | 0.345979  |
| 301 | 0.000028  | -0.000017 | 0.000001  | 0.000002  | -0.000027 | -0.000002 | 0.000009  | 0.000013  | -0.000024 | -0.000056 | -0.000080 | -0.010166 |
| 302 | -0.000012 | 0.000001  | 0.000000  | 0.000003  | 0.000005  | 0.000037  | 0.000005  | 0.000001  | 0.000018  | 0.000024  | 0.000024  | -0.007101 |
| 303 | -0.000008 | 0.000004  | 0.000003  | 0.000002  | 0.000000  | -0.000018 | -0.000026 | 0.000018  | 0.000029  | 0.000032  | 0.000035  | -0.038776 |
| 304 | -0.000034 | 0.000023  | 0.000002  | 0.000006  | 0.000035  | -0.000017 | -0.000054 | 0.000024  | 0.000032  | 0.000048  | 0.000051  | -0.007366 |
| 305 | -0.000053 | 0.000025  | -0.000005 | 0.000007  | 0.000050  | -0.000156 | -0.000092 | 0.000023  | 0.000031  | 0.000050  | 0.000069  | 0.010738  |
| 306 | -0.000122 | 0.000092  | 0.000053  | -0.000019 | 0.000097  | 0.000161  | 0.000060  | 0.000003  | 0.000034  | -0.000030 | 0.000009  | 0.000126  |
| 307 | 0.000042  | -0.000005 | 0.000057  | 0.000056  | -0.000011 | 0.000195  | 0.000067  | 0.000012  | 0.000029  | -0.000041 | -0.000069 | -0.000234 |
| 308 | 0.000048  | -0.000021 | 0.000001  | -0.000010 | -0.000068 | 0.000022  | 0.000008  | -0.000003 | 0.000010  | 0.000001  | -0.000027 | -0.000133 |
| 309 | 0.000018  | -0.000014 | -0.000016 | -0.000009 | -0.000001 | -0.000001 | -0.000004 | 0.000003  | -0.000007 | -0.000004 | 0.000000  | 0.000004  |
| 310 | -0.000010 | 0.000003  | 0.000008  | 0.000007  | 0.000017  | -0.000018 | 0.000006  | 0.000000  | -0.000001 | -0.000003 | 0.000005  | 0.000021  |
| 311 | -0.000018 | 0.000019  | -0.000006 | -0.000012 | 0.000019  | -0.000110 | -0.000041 | 0.000004  | 0.000005  | 0.000028  | 0.000044  | 0.000111  |
| 312 | -0.000077 | 0.000017  | -0.000044 | -0.000033 | 0.000042  | -0.000087 | -0.000036 | -0.000016 | -0.000034 | 0.000019  | 0.000047  | 0.000226  |
| 313 | 0.010835  | -0.003326 | 0.002393  | 0.003638  | 0.012725  | 0.000180  | -0.000185 | 0.000038  | -0.000004 | -0.000028 | -0.000101 | 0.000252  |
| 314 | 0.047820  | -0.024301 | 0.024898  | 0.053517  | -0.000065 | -0.000183 | -0.000033 | -0.000030 | -0.000031 | 0.000035  | 0.000086  | 0.000244  |
| 315 | 0.024583  | 0.024409  | 0.051530  | -0.007557 | 0.005439  | 0.000051  | 0.000005  | -0.000019 | 0.000000  | 0.000006  | -0.000006 | -0.000016 |
| 316 | -0.024967 | 0.053488  | -0.009428 | 0.006816  | -0.053658 | -0.000016 | 0.000004  | 0.000011  | 0.000006  | 0.000005  | 0.000030  | -0.000012 |
| 317 | -0.053214 | -0.006994 | 0.009282  | -0.053565 | -0.024806 | -0.000016 | 0.000011  | -0.000011 | -0.000004 | 0.000008  | 0.000017  | 0.000024  |
| 318 | 0.006126  | 0.007446  | -0.051253 | -0.024482 | 0.025094  | 0.000071  | 0.000051  | -0.000014 | -0.000008 | -0.000027 | -0.000054 | -0.000070 |
| 319 | -0.000887 | -0.052704 | -0.025211 | 0.023936  | 0.047655  | 0.000095  | -0.000038 | 0.000062  | 0.000037  | -0.000027 | -0.000073 | -0.000168 |
| 320 | -0.000158 | 0.000072  | 0.000002  | -0.000006 | -0.000171 | 0.002164  | 0.007845  | -0.002616 | 0.000927  | 0.004196  | 0.011190  | -0.000010 |
| 321 | -0.000019 | 0.000012  | -0.000022 | -0.000046 | 0.000037  | 0.002033  | 0.048721  | -0.023899 | 0.024935  | 0.053139  | 0.001470  | 0.000109  |
| 322 | -0.000037 | 0.000007  | -0.000007 | 0.000007  | 0.000017  | 0.065648  | 0.024759  | 0.024420  | 0.051506  | -0.006834 | 0.004707  | 0.000105  |
| 323 | 0.000007  | -0.000001 | 0.000003  | 0.000000  | 0.000016  | 0.033519  | -0.025031 | 0.053377  | -0.009259 | 0.006291  | -0.053769 | 0.000016  |
| 324 | 0.000017  | -0.000011 | -0.000003 | 0.000005  | 0.000019  | -0.033901 | -0.053012 | -0.007351 | 0.008925  | -0.053582 | -0.024583 | -0.000041 |
| 325 | 0.000034  | -0.000010 | -0.000004 | 0.000001  | -0.000014 | -0.065978 | 0.007374  | 0.007810  | -0.051382 | -0.024577 | 0.024811  | 0.000047  |
| 326 | 0.000001  | 0.000002  | 0.000032  | 0.000033  | -0.000074 | -0.003214 | -0.002870 | -0.053033 | -0.024529 | 0.024171  | 0.046596  | -0.000235 |
| 327 | -0.000043 | 0.000054  | -0.000016 | 0.000006  | 0.000105  | -0.000355 | -0.000238 | 0.000106  | -0.000005 | -0.000030 | 0.000028  | 0.003983  |
| 328 | 0.000014  | -0.000005 | 0.000026  | 0.000022  | -0.000024 | -0.000024 | -0.000027 | 0.000064  | 0.000025  | 0.000009  | -0.000005 | 0.000494  |
| 329 | 0.000051  | -0.000028 | -0.000002 | -0.000007 | -0.000052 | 0.000064  | 0.000041  | -0.000007 | 0.000000  | -0.000018 | -0.000061 | 0.067640  |
| 330 | 0.000006  | 0.000000  | -0.000001 | 0.000000  | 0.000004  | 0.000120  | 0.000040  | -0.000018 | -0.000010 | -0.000012 | -0.000018 | 0.035665  |

|     |           |           |           |           |          |           |           |           |           |          |          |           |
|-----|-----------|-----------|-----------|-----------|----------|-----------|-----------|-----------|-----------|----------|----------|-----------|
| 331 | -0.000005 | 0.000007  | 0.000007  | -0.000002 | 0.000001 | -0.000073 | -0.000013 | 0.000002  | 0.000004  | 0.000015 | 0.000034 | -0.035022 |
| 332 | -0.000026 | -0.000003 | -0.000008 | 0.000005  | 0.000010 | -0.000038 | -0.000011 | 0.000005  | 0.000002  | 0.000001 | 0.000020 | -0.069065 |
| 333 | -0.000041 | 0.000030  | -0.000023 | -0.000018 | 0.000061 | -0.000052 | -0.000029 | -0.000047 | -0.000020 | 0.000005 | 0.000031 | -0.001119 |

|    | 301       | 302       | 303       | 304       | 305       | 306       | 307       | 308       | 309       | 310       | 311       | 312       |
|----|-----------|-----------|-----------|-----------|-----------|-----------|-----------|-----------|-----------|-----------|-----------|-----------|
| 1  | 0.000549  | -0.000160 | -0.000060 | -0.000001 | 0.000230  | 0.000219  | 0.000010  | 0.000035  | 0.000079  | 0.000070  | 0.000013  | -0.000201 |
| 2  | -0.001780 | 0.000650  | 0.000547  | 0.000322  | -0.000022 | 0.002181  | -0.000070 | 0.000197  | -0.000032 | -0.000359 | -0.000448 | 0.000698  |
| 3  | -0.001762 | -0.000449 | -0.003910 | -0.001329 | 0.001763  | 0.006009  | -0.005884 | -0.006412 | -0.004107 | 0.004043  | 0.005790  | 0.006220  |
| 4  | 0.000381  | -0.000193 | -0.000290 | -0.000309 | 0.000223  | -0.018101 | 0.006883  | 0.005674  | 0.003973  | -0.004011 | -0.005952 | -0.006242 |
| 5  | 0.000259  | 0.000291  | 0.000160  | 0.000012  | -0.000082 | -0.016137 | -0.001214 | 0.000214  | 0.000314  | -0.000035 | -0.000621 | 0.001338  |
| 6  | 0.001664  | 0.000652  | 0.003795  | 0.000922  | -0.002238 | -0.015693 | 0.001365  | 0.000195  | 0.000246  | -0.000068 | -0.000484 | -0.001236 |
| 7  | 0.000017  | -0.000087 | -0.000076 | -0.000036 | -0.000194 | 0.000064  | -0.000028 | -0.000249 | -0.000143 | 0.000039  | 0.000193  | 0.000184  |
| 8  | -0.004477 | -0.001840 | -0.007532 | -0.001701 | 0.005883  | 0.001434  | -0.000904 | 0.000891  | 0.000955  | -0.000787 | -0.002164 | 0.002053  |
| 9  | 0.000994  | 0.000938  | 0.001336  | -0.000389 | -0.002234 | 0.000792  | -0.005337 | -0.010736 | -0.006958 | 0.006794  | 0.011410  | 0.004282  |
| 10 | -0.000161 | -0.000546 | -0.000137 | 0.000334  | 0.000232  | -0.042149 | 0.005860  | 0.012264  | 0.007538  | -0.007286 | -0.011635 | -0.006156 |
| 11 | 0.000244  | 0.000140  | -0.000041 | -0.000318 | -0.000281 | 0.010523  | 0.001756  | -0.002783 | -0.001285 | 0.001180  | 0.001470  | -0.000432 |
| 12 | -0.000121 | 0.000118  | -0.000032 | -0.000071 | 0.000157  | -0.002123 | -0.001738 | 0.000802  | -0.000224 | -0.000007 | 0.000187  | 0.000975  |
| 13 | 0.000034  | -0.000155 | 0.000095  | 0.000388  | -0.000233 | -0.001640 | 0.000614  | -0.000398 | 0.000134  | 0.000003  | -0.000162 | -0.000191 |
| 14 | -0.002191 | 0.000406  | -0.001178 | -0.000865 | 0.001232  | -0.002403 | -0.000483 | -0.000055 | 0.000059  | 0.000163  | -0.000470 | 0.000780  |
| 15 | 0.005943  | 0.000477  | 0.007077  | 0.002346  | -0.005303 | -0.000850 | 0.001356  | 0.000204  | -0.000044 | -0.000332 | 0.000759  | -0.001926 |
| 16 | 0.002435  | -0.000809 | -0.003747 | -0.002615 | 0.002343  | 0.039010  | -0.000466 | 0.003328  | 0.002285  | -0.002214 | -0.003772 | 0.000991  |
| 17 | 0.000372  | -0.001029 | -0.000467 | -0.000151 | -0.000528 | 0.006329  | 0.003314  | -0.000676 | -0.000389 | -0.000169 | 0.002358  | -0.004430 |
| 18 | 0.000221  | 0.001566  | 0.003400  | 0.001113  | -0.002161 | -0.035071 | -0.002882 | -0.004588 | -0.002571 | 0.003622  | 0.002613  | 0.003586  |
| 19 | 0.000502  | -0.000220 | 0.000001  | -0.000079 | -0.000450 | -0.057879 | 0.002296  | 0.005007  | 0.004837  | -0.003409 | -0.006650 | -0.001823 |
| 20 | -0.000269 | 0.000047  | 0.000002  | -0.000031 | -0.000157 | 0.008416  | -0.003587 | 0.001877  | -0.000508 | -0.000207 | 0.000010  | 0.002409  |
| 21 | 0.000027  | -0.000135 | 0.000049  | 0.000173  | -0.000029 | 0.058379  | 0.001122  | -0.005768 | -0.003264 | 0.003013  | 0.004950  | -0.000272 |
| 22 | -0.000014 | -0.000188 | -0.000028 | 0.000143  | 0.000033  | 0.001578  | 0.000835  | -0.000103 | 0.000051  | -0.000063 | 0.000238  | -0.000955 |
| 23 | -0.000145 | 0.000018  | 0.000001  | -0.000030 | -0.000194 | 0.004967  | 0.000042  | 0.000003  | -0.000195 | 0.000087  | -0.000094 | 0.000156  |
| 24 | -0.000311 | 0.000030  | 0.000001  | 0.000200  | 0.000454  | 0.001466  | -0.000222 | -0.000019 | -0.000084 | -0.000073 | 0.000499  | -0.000105 |
| 25 | -0.002141 | -0.000813 | -0.003074 | -0.001331 | 0.001672  | 0.001228  | 0.000148  | 0.000468  | -0.000151 | -0.000046 | 0.000107  | -0.000514 |
| 26 | -0.000554 | 0.000219  | 0.000636  | 0.001204  | 0.000577  | 0.004692  | 0.000163  | -0.000342 | -0.000030 | -0.000021 | 0.000166  | 0.000056  |
| 27 | 0.002304  | 0.002113  | 0.003132  | 0.000592  | 0.000164  | 0.001276  | -0.000790 | 0.000256  | -0.000125 | 0.000055  | 0.000062  | 0.000542  |
| 28 | -0.000233 | -0.000920 | -0.000028 | 0.000622  | -0.000906 | -0.058187 | 0.010479  | -0.013736 | -0.003809 | 0.004745  | 0.008818  | -0.006906 |
| 29 | 0.000009  | 0.000803  | 0.000272  | -0.000539 | -0.000334 | -0.099866 | -0.007011 | 0.011511  | 0.005769  | -0.004632 | -0.014857 | 0.009579  |
| 30 | -0.000580 | 0.000019  | -0.000059 | 0.000097  | 0.000320  | 0.013387  | -0.000369 | 0.001458  | -0.000533 | -0.000553 | 0.001073  | -0.001054 |
| 31 | 0.000235  | -0.000137 | 0.000083  | 0.000064  | -0.000481 | 0.013498  | 0.001684  | -0.001426 | -0.000057 | 0.000510  | -0.000302 | -0.000428 |
| 32 | -0.000250 | 0.000534  | -0.000176 | -0.000690 | 0.000381  | 0.007378  | -0.000939 | 0.000798  | -0.000350 | 0.000123  | -0.000406 | 0.000784  |
| 33 | -0.000755 | -0.000782 | 0.000132  | 0.001176  | 0.000209  | 0.007291  | 0.001009  | -0.000823 | -0.000040 | -0.000085 | 0.001023  | -0.001096 |
| 34 | 0.006547  | 0.003986  | 0.006594  | 0.001454  | -0.007700 | 0.013628  | -0.000653 | -0.000843 | 0.000173  | 0.000315  | -0.001026 | 0.002013  |
| 35 | -0.005985 | -0.001441 | -0.006982 | -0.004706 | 0.006840  | 0.010440  | -0.000565 | 0.000415  | -0.000693 | -0.000288 | 0.002295  | -0.001170 |
| 36 | 0.002252  | -0.000685 | 0.001189  | 0.000512  | -0.001299 | 0.000016  | 0.000248  | -0.000037 | 0.000000  | 0.000026  | 0.000046  | -0.000281 |
| 37 | 0.000073  | -0.000081 | -0.000092 | -0.000034 | 0.000014  | 0.013444  | 0.000774  | 0.001714  | 0.000995  | -0.001296 | -0.000223 | -0.001866 |
| 38 | 0.000071  | -0.000057 | -0.000022 | -0.000039 | -0.000107 | 0.019382  | -0.002230 | -0.000321 | -0.001589 | 0.001097  | 0.002167  | 0.000806  |
| 39 | 0.000026  | -0.000023 | -0.000010 | -0.000018 | -0.000042 | 0.000065  | -0.000236 | 0.000061  | 0.000038  | 0.000002  | -0.000051 | 0.000186  |
| 40 | 0.000000  | -0.000005 | -0.000003 | -0.000005 | -0.000014 | 0.000015  | -0.000063 | -0.000002 | -0.000002 | -0.000005 | 0.000007  | 0.000064  |
| 41 | -0.000014 | 0.000012  | 0.000022  | 0.000021  | -0.000002 | 0.000054  | 0.000048  | 0.000007  | -0.000017 | 0.000004  | -0.000002 | -0.000040 |
| 42 | -0.000008 | 0.000060  | 0.000091  | 0.000084  | 0.000103  | 0.000050  | 0.000025  | 0.000020  | -0.000030 | 0.000007  | 0.000009  | -0.000031 |
| 43 | -0.001720 | -0.000407 | -0.001339 | 0.000602  | 0.002272  | 0.000069  | 0.000019  | 0.000003  | -0.000008 | -0.000014 | 0.000029  | -0.000029 |
| 44 | 0.000105  | -0.000043 | -0.000001 | -0.000049 | -0.000072 | 0.041608  | -0.001182 | -0.000279 | 0.003244  | 0.001727  | -0.002789 | -0.000699 |



|    |           |           |           |           |           |           |           |           |           |           |           |           |
|----|-----------|-----------|-----------|-----------|-----------|-----------|-----------|-----------|-----------|-----------|-----------|-----------|
| 45 | -0.000088 | -0.000013 | 0.000003  | 0.000063  | 0.000027  | 0.000750  | 0.000113  | -0.000114 | 0.000038  | 0.000019  | -0.000018 | -0.000040 |
| 46 | -0.000097 | 0.000072  | 0.000007  | 0.000008  | 0.000135  | 0.000084  | -0.000009 | 0.000047  | -0.000026 | -0.000022 | 0.000055  | -0.000045 |
| 47 | 0.004874  | -0.001660 | -0.000848 | 0.000253  | 0.004281  | 0.000193  | -0.000178 | -0.000005 | 0.000017  | 0.000030  | -0.000051 | 0.000186  |
| 48 | 0.000149  | -0.000062 | -0.000005 | -0.000059 | 0.000072  | 0.000652  | 0.000264  | -0.000222 | -0.000139 | 0.000070  | 0.000092  | -0.000066 |
| 49 | -0.000088 | 0.000059  | 0.000063  | 0.000139  | 0.000054  | -0.000915 | -0.000356 | 0.000115  | 0.000170  | -0.000030 | -0.000099 | 0.000201  |
| 50 | -0.000278 | 0.000082  | -0.000006 | 0.000081  | -0.000116 | -0.001587 | -0.000975 | 0.000566  | 0.000327  | -0.000134 | -0.000181 | 0.000402  |
| 51 | -0.000161 | -0.000104 | -0.000287 | -0.000378 | -0.000956 | 0.001516  | 0.000490  | -0.000122 | -0.000194 | -0.000046 | 0.000146  | -0.000276 |
| 52 | 0.000216  | 0.000021  | 0.000133  | 0.000067  | 0.000186  | -0.002495 | -0.000534 | 0.000299  | 0.000135  | 0.000030  | -0.000033 | 0.000111  |
| 53 | -0.000027 | 0.000011  | 0.000017  | 0.000035  | 0.000066  | -0.000023 | -0.000059 | 0.000006  | -0.000001 | -0.000006 | 0.000020  | 0.000040  |
| 54 | -0.000012 | -0.000002 | 0.000002  | 0.000006  | -0.000006 | 0.000049  | 0.000013  | 0.000019  | -0.000013 | -0.000003 | 0.000005  | -0.000021 |
| 55 | -0.000003 | 0.000098  | 0.000101  | 0.000119  | 0.000057  | -0.000735 | -0.000132 | -0.000055 | 0.000145  | 0.000043  | -0.000083 | 0.000084  |
| 56 | -0.000087 | 0.000015  | -0.000034 | -0.000048 | -0.000146 | -0.001648 | -0.000507 | 0.000450  | 0.000142  | -0.000105 | -0.000048 | 0.000075  |
| 57 | -0.000028 | -0.000019 | -0.000054 | -0.000078 | -0.000183 | -0.000160 | -0.000017 | 0.000019  | 0.000011  | -0.000008 | -0.000005 | 0.000001  |
| 58 | -0.000038 | -0.000031 | -0.000065 | -0.000082 | -0.000172 | 0.000007  | -0.000064 | 0.000034  | -0.000004 | -0.000012 | 0.000014  | 0.000032  |
| 59 | 0.000030  | -0.000017 | 0.000014  | 0.000020  | 0.000076  | 0.000101  | 0.000028  | 0.000006  | -0.000027 | -0.000004 | 0.000013  | -0.000016 |
| 60 | 0.000103  | -0.000064 | -0.000014 | 0.000000  | -0.000028 | -0.000045 | 0.000005  | 0.000046  | -0.000012 | 0.000015  | 0.000027  | -0.000079 |
| 61 | 0.000245  | -0.000134 | 0.000062  | 0.000738  | 0.000573  | 0.007699  | 0.002783  | -0.001750 | -0.000569 | -0.000020 | 0.000515  | -0.000977 |
| 62 | -0.000049 | -0.000014 | -0.000083 | -0.000492 | -0.000665 | -0.008316 | -0.002582 | 0.001370  | 0.000653  | -0.000064 | -0.000590 | 0.001213  |
| 63 | -0.000449 | -0.000083 | -0.000293 | -0.000212 | -0.001464 | -0.007222 | -0.001995 | 0.001785  | 0.000707  | -0.000454 | -0.000384 | 0.000369  |
| 64 | 0.000671  | -0.000019 | 0.000234  | 0.000295  | 0.001251  | 0.005406  | 0.001854  | -0.001664 | -0.000520 | 0.000284  | 0.000129  | -0.000122 |
| 65 | 0.000502  | -0.000011 | 0.000170  | -0.000196 | 0.001071  | 0.010232  | 0.003177  | -0.002408 | -0.001222 | 0.000638  | 0.000733  | -0.000955 |
| 66 | -0.000163 | -0.000035 | -0.000013 | 0.000027  | -0.000116 | 0.002135  | -0.000181 | 0.000687  | 0.000010  | -0.000262 | 0.000219  | -0.000438 |
| 67 | -0.000267 | 0.000250  | 0.000086  | -0.000327 | -0.000178 | -0.009587 | -0.003938 | 0.002323  | 0.001047  | -0.000144 | -0.000783 | 0.001522  |
| 68 | -0.000466 | 0.000070  | -0.000112 | 0.000201  | -0.000479 | 0.001830  | 0.000909  | -0.000378 | -0.000156 | 0.000029  | 0.000244  | -0.000646 |
| 69 | -0.000206 | -0.000406 | -0.000630 | -0.000363 | 0.000138  | -0.028083 | 0.000047  | 0.000156  | 0.000543  | -0.000050 | -0.001052 | 0.000358  |
| 70 | -0.000504 | -0.000096 | 0.000065  | 0.000221  | -0.000170 | 0.002417  | -0.000847 | 0.001133  | 0.000329  | -0.000407 | -0.000801 | 0.000625  |
| 71 | 0.000258  | 0.000164  | 0.000556  | 0.000486  | -0.000194 | 0.021550  | 0.000033  | -0.000189 | -0.000403 | 0.000052  | 0.000674  | -0.000172 |
| 72 | 0.000416  | 0.000363  | 0.000022  | -0.000370 | 0.000254  | 0.004527  | 0.000761  | -0.001078 | -0.000498 | 0.000429  | 0.001216  | -0.000856 |
| 73 | -0.002275 | 0.000687  | -0.003323 | -0.000431 | 0.001732  | 0.029558  | -0.001255 | 0.005079  | 0.002463  | -0.003080 | -0.004216 | 0.001205  |
| 74 | -0.001015 | -0.001143 | -0.002941 | -0.001229 | 0.002599  | 0.001930  | 0.000423  | -0.001284 | -0.000509 | 0.000601  | 0.001066  | -0.000342 |
| 75 | -0.000857 | -0.000056 | -0.000630 | -0.000342 | 0.000689  | -0.019526 | 0.001732  | -0.003734 | -0.001684 | 0.002233  | 0.002826  | -0.001505 |
| 76 | 0.000657  | 0.001422  | 0.004012  | 0.001745  | -0.003122 | -0.007552 | -0.011162 | -0.004902 | -0.004013 | 0.003838  | 0.004221  | 0.011654  |
| 77 | 0.000426  | -0.000236 | -0.000370 | -0.000214 | 0.000673  | -0.032614 | 0.012225  | 0.004690  | 0.004336  | -0.004271 | -0.005715 | -0.010889 |
| 78 | -0.000086 | -0.000041 | 0.000059  | 0.000069  | -0.000168 | -0.034567 | -0.001768 | 0.004090  | 0.002922  | -0.002080 | -0.004772 | 0.001768  |
| 79 | -0.000123 | -0.000079 | 0.000050  | 0.000126  | -0.000146 | 0.000305  | -0.000174 | 0.000861  | 0.000508  | -0.000437 | -0.001252 | 0.000527  |
| 80 | 0.000172  | 0.000106  | -0.000004 | -0.000096 | 0.000160  | 0.050482  | 0.001459  | -0.005972 | -0.003962 | 0.003044  | 0.006467  | -0.001276 |
| 81 | 0.000320  | 0.000002  | -0.000053 | -0.000164 | -0.000032 | -0.016575 | -0.001276 | 0.000392  | 0.000460  | -0.000036 | -0.000759 | 0.001222  |
| 82 | -0.000240 | -0.000103 | -0.000029 | 0.000143  | 0.000011  | 0.004408  | 0.000285  | -0.000040 | -0.000126 | -0.000004 | 0.000216  | -0.000333 |
| 83 | -0.000234 | -0.000072 | -0.000044 | 0.000100  | 0.000033  | 0.004354  | -0.000035 | 0.000018  | -0.000147 | -0.000023 | 0.000286  | -0.000101 |
| 84 | 0.000677  | 0.000274  | 0.000191  | -0.000047 | -0.000133 | -0.007835 | -0.000348 | -0.000029 | 0.000126  | 0.000035  | -0.000217 | 0.000430  |
| 85 | -0.003219 | -0.001297 | -0.003728 | -0.001331 | 0.001710  | -0.008038 | 0.000339  | 0.000075  | 0.000209  | -0.000062 | -0.000349 | -0.000207 |
| 86 | 0.000810  | 0.000156  | 0.000674  | 0.000194  | -0.000671 | 0.004136  | -0.000033 | 0.000055  | -0.000108 | -0.000050 | 0.000232  | -0.000096 |
| 87 | 0.002636  | 0.000868  | 0.002681  | 0.000974  | -0.001715 | 0.004203  | -0.000261 | 0.000004  | -0.000099 | -0.000011 | 0.000162  | 0.000203  |
| 88 | 0.001734  | -0.000228 | 0.003057  | -0.000394 | -0.002997 | -0.015586 | 0.001026  | 0.000088  | 0.000272  | 0.000034  | -0.000280 | -0.001126 |
| 89 | -0.000368 | 0.000232  | 0.000047  | -0.000044 | -0.000321 | 0.005639  | -0.000647 | 0.001550  | -0.000459 | -0.000821 | 0.000914  | -0.000477 |
| 90 | 0.000007  | 0.000022  | -0.000010 | -0.000068 | -0.000067 | 0.005877  | 0.001118  | -0.000054 | -0.000126 | -0.000032 | -0.000039 | -0.000858 |
| 91 | -0.000160 | -0.000119 | -0.000009 | -0.000086 | -0.000172 | 0.003982  | 0.000093  | -0.000090 | -0.000036 | 0.000048  | 0.000013  | -0.000029 |
| 92 | -0.000591 | -0.000422 | 0.000008  | 0.000581  | -0.000794 | 0.004791  | -0.000689 | -0.000245 | -0.000156 | 0.000040  | 0.000220  | 0.000815  |
| 93 | 0.001033  | 0.000193  | 0.001114  | 0.000616  | -0.001117 | -0.001019 | -0.000260 | 0.000644  | 0.000239  | -0.000313 | -0.000501 | 0.000213  |
| 94 | -0.000021 | 0.000950  | 0.001827  | 0.000614  | -0.001485 | -0.000885 | -0.000162 | 0.000638  | 0.000270  | -0.000289 | -0.000566 | 0.000131  |

|     |           |           |           |           |           |           |           |           |           |           |           |           |
|-----|-----------|-----------|-----------|-----------|-----------|-----------|-----------|-----------|-----------|-----------|-----------|-----------|
| 95  | 0.000508  | -0.000029 | 0.000260  | 0.000124  | -0.000373 | 0.014664  | -0.000059 | 0.002105  | 0.001208  | -0.001321 | -0.002227 | 0.000380  |
| 96  | 0.000317  | 0.000104  | 0.000376  | 0.000202  | -0.000337 | 0.004910  | -0.001667 | 0.001636  | 0.000474  | -0.000924 | -0.000604 | 0.001131  |
| 97  | 0.000090  | -0.000004 | -0.000043 | -0.000052 | 0.000048  | 0.008616  | 0.000477  | -0.000598 | -0.001063 | 0.000440  | 0.001825  | -0.001118 |
| 98  | -0.000004 | 0.000046  | -0.000015 | -0.000019 | 0.000121  | 0.025909  | 0.001279  | -0.003487 | -0.001856 | 0.001643  | 0.002945  | -0.000647 |
| 99  | 0.000081  | 0.000031  | -0.000027 | -0.000069 | 0.000052  | 0.000035  | 0.000051  | -0.000457 | -0.000229 | 0.000244  | 0.000600  | -0.000227 |
| 100 | 0.000045  | 0.000047  | -0.000025 | -0.000056 | 0.000092  | -0.000131 | 0.000138  | -0.000421 | -0.000279 | 0.000198  | 0.000639  | -0.000291 |
| 101 | 0.000113  | 0.000053  | 0.000013  | -0.000070 | 0.000005  | -0.002201 | -0.000168 | 0.000021  | 0.000073  | -0.000001 | -0.000114 | 0.000189  |
| 102 | 0.000128  | 0.000050  | 0.000013  | -0.000076 | -0.000020 | -0.002198 | -0.000117 | 0.000015  | 0.000053  | 0.000006  | -0.000105 | 0.000148  |
| 103 | 0.000149  | 0.000024  | 0.000012  | -0.000070 | -0.000053 | -0.002189 | 0.000092  | 0.000009  | 0.000073  | 0.000012  | -0.000161 | -0.000023 |
| 104 | 0.000087  | 0.000048  | 0.000033  | -0.000030 | 0.000022  | -0.002161 | -0.000055 | -0.000028 | 0.000073  | 0.000012  | -0.000125 | 0.000124  |
| 105 | -0.000394 | -0.000122 | -0.000379 | -0.000142 | 0.000301  | -0.002026 | 0.000021  | -0.000025 | 0.000052  | 0.000025  | -0.000118 | 0.000045  |
| 106 | -0.000413 | -0.000038 | -0.000291 | -0.000047 | 0.000373  | -0.002094 | 0.000012  | -0.000029 | 0.000057  | 0.000024  | -0.000116 | 0.000052  |
| 107 | -0.001550 | -0.000346 | -0.001591 | -0.000786 | 0.000706  | -0.002128 | 0.000172  | 0.000011  | 0.000056  | -0.000002 | -0.000102 | -0.000134 |
| 108 | -0.001102 | -0.000517 | -0.001095 | -0.000189 | 0.000985  | -0.002092 | 0.000091  | -0.000016 | 0.000043  | 0.000011  | -0.000058 | -0.000070 |
| 109 | 0.000304  | -0.000084 | -0.000011 | -0.000083 | 0.000019  | 0.018227  | 0.020897  | -0.016114 | -0.004303 | 0.005359  | 0.013086  | -0.019309 |
| 110 | 0.000047  | -0.000141 | -0.000039 | 0.000120  | 0.000293  | -0.023749 | -0.020115 | 0.014607  | 0.004784  | -0.004573 | -0.014015 | 0.019636  |
| 111 | 0.000085  | 0.000006  | 0.000016  | -0.000065 | -0.000148 | -0.002154 | -0.000290 | 0.000132  | 0.000062  | -0.000017 | -0.000149 | 0.000263  |
| 112 | -0.000083 | -0.000031 | -0.000011 | 0.000130  | 0.000209  | -0.003560 | -0.000831 | -0.000088 | 0.000067  | 0.000050  | 0.000171  | 0.000621  |
| 113 | 0.000032  | 0.000117  | 0.000057  | 0.000047  | 0.000076  | -0.001501 | 0.000177  | 0.000149  | 0.000009  | -0.000054 | -0.000104 | -0.000169 |
| 114 | 0.000127  | 0.000000  | -0.000048 | 0.000039  | 0.000098  | -0.002465 | -0.000272 | -0.000052 | 0.000028  | 0.000005  | 0.000091  | 0.000195  |
| 115 | 0.012775  | 0.003168  | 0.007703  | 0.003357  | -0.012316 | -0.002094 | 0.000648  | 0.000332  | 0.000037  | -0.000067 | -0.000238 | -0.000696 |
| 116 | -0.012072 | -0.002771 | -0.007740 | -0.003934 | 0.013056  | -0.002855 | 0.000018  | -0.000082 | 0.000124  | 0.000026  | 0.000021  | -0.000106 |
| 117 | -0.000383 | 0.000231  | 0.000097  | 0.000283  | 0.000152  | -0.002371 | -0.001431 | 0.000549  | 0.000601  | -0.000137 | -0.000418 | 0.000837  |
| 118 | -0.000201 | 0.000123  | 0.000082  | 0.000177  | 0.000265  | -0.001223 | -0.000859 | 0.000349  | 0.000305  | -0.000082 | -0.000178 | 0.000466  |
| 119 | -0.000208 | 0.000104  | 0.000080  | 0.000189  | 0.000211  | -0.001085 | -0.000664 | 0.000371  | 0.000270  | -0.000091 | -0.000168 | 0.000285  |
| 120 | -0.000012 | 0.000053  | 0.000062  | 0.000078  | 0.000137  | -0.000932 | -0.000367 | 0.000146  | 0.000132  | -0.000015 | -0.000059 | 0.000165  |
| 121 | 0.000008  | -0.000027 | -0.000029 | -0.000033 | -0.000063 | 0.000477  | 0.000184  | -0.000081 | -0.000067 | 0.000008  | 0.000032  | -0.000077 |
| 122 | 0.000002  | -0.000026 | -0.000034 | -0.000046 | -0.000077 | 0.000444  | 0.000180  | -0.000063 | -0.000065 | 0.000008  | 0.000027  | -0.000087 |
| 123 | -0.000021 | 0.000033  | 0.000051  | 0.000045  | 0.000195  | -0.000665 | -0.000366 | 0.000234  | 0.000088  | -0.000026 | -0.000051 | 0.000124  |
| 124 | -0.000017 | 0.000015  | 0.000012  | 0.000037  | -0.000026 | -0.000406 | -0.000160 | 0.000032  | 0.000061  | -0.000003 | -0.000038 | 0.000109  |
| 125 | 0.000041  | -0.000048 | -0.000061 | -0.000080 | -0.000162 | 0.001094  | 0.000531  | -0.000270 | -0.000150 | 0.000029  | 0.000091  | -0.000235 |
| 126 | -0.000285 | 0.000062  | -0.000057 | -0.000033 | -0.000183 | -0.000024 | -0.000323 | 0.000313  | 0.000149  | -0.000120 | -0.000080 | 0.000062  |
| 127 | -0.000182 | 0.000063  | -0.000021 | -0.000004 | -0.000139 | -0.001816 | -0.000967 | 0.000586  | 0.000252  | -0.000106 | -0.000129 | 0.000370  |
| 128 | 0.000014  | 0.000009  | 0.000011  | 0.000006  | -0.000003 | -0.000051 | 0.000067  | -0.000070 | 0.000023  | 0.000022  | -0.000004 | -0.000039 |
| 129 | -0.000049 | 0.000001  | -0.000030 | -0.000026 | -0.000118 | 0.000105  | -0.000023 | -0.000019 | -0.000018 | -0.000002 | 0.000011  | 0.000049  |
| 130 | 0.000026  | -0.000023 | -0.000024 | -0.000037 | -0.000054 | 0.000164  | 0.000067  | -0.000026 | -0.000014 | -0.000011 | 0.000004  | -0.000019 |
| 131 | -0.000036 | -0.000022 | -0.000072 | -0.000107 | -0.000238 | -0.000475 | -0.000168 | 0.000142  | 0.000047  | -0.000006 | -0.000033 | 0.000021  |
| 132 | 0.000016  | 0.000014  | 0.000053  | 0.000077  | 0.000194  | 0.000223  | 0.000031  | -0.000023 | -0.000028 | -0.000009 | 0.000027  | 0.000001  |
| 133 | 0.000029  | 0.000021  | 0.000062  | 0.000086  | 0.000218  | 0.000023  | 0.000022  | -0.000002 | -0.000009 | 0.000006  | -0.000005 | -0.000013 |
| 134 | -0.001362 | 0.000814  | -0.000026 | -0.001008 | -0.000989 | 0.014527  | 0.001597  | -0.001581 | -0.000417 | 0.000651  | -0.000531 | 0.000267  |
| 135 | -0.003567 | -0.000063 | 0.001176  | 0.000495  | -0.002084 | 0.011581  | 0.000984  | -0.000674 | 0.000122  | 0.000029  | -0.000565 | 0.000110  |
| 136 | -0.001385 | 0.000173  | -0.000062 | -0.000064 | -0.001046 | 0.011096  | 0.000692  | -0.000537 | 0.000132  | -0.000093 | -0.000826 | 0.000632  |
| 137 | -0.001144 | 0.000650  | 0.000185  | -0.000584 | -0.000755 | 0.001910  | 0.000209  | 0.000295  | -0.000064 | -0.000453 | -0.000198 | 0.000214  |
| 138 | -0.001176 | 0.000847  | 0.000290  | -0.000753 | -0.000629 | 0.032316  | 0.002985  | 0.001671  | 0.000204  | -0.001685 | 0.000315  | -0.003411 |
| 139 | -0.000419 | 0.000108  | 0.000032  | 0.000033  | 0.000003  | -0.011090 | -0.000107 | 0.001149  | -0.000691 | -0.000264 | 0.001522  | -0.001565 |
| 140 | -0.000583 | 0.000239  | 0.000046  | -0.000313 | -0.000101 | -0.038929 | 0.000517  | 0.001513  | 0.002165  | -0.000765 | -0.002090 | -0.001280 |
| 141 | -0.000108 | 0.000084  | 0.000088  | -0.000178 | 0.000140  | -0.004817 | -0.001389 | 0.000589  | 0.000313  | 0.000284  | -0.000225 | 0.000421  |
| 142 | -0.000122 | 0.000107  | 0.000123  | -0.000037 | 0.000152  | -0.010979 | -0.000775 | 0.000923  | -0.000028 | -0.000261 | 0.000662  | -0.000500 |
| 143 | -0.000127 | 0.000071  | 0.000137  | 0.000043  | 0.000162  | -0.012174 | -0.000232 | 0.001224  | 0.000174  | -0.000519 | 0.000662  | -0.001258 |
| 144 | -0.000106 | 0.000068  | 0.000301  | 0.000168  | 0.000506  | -0.003746 | -0.000788 | 0.000616  | 0.000156  | -0.000094 | 0.000143  | -0.000013 |

|     |           |           |           |           |           |           |           |           |           |           |           |           |
|-----|-----------|-----------|-----------|-----------|-----------|-----------|-----------|-----------|-----------|-----------|-----------|-----------|
| 145 | -0.000096 | 0.000074  | 0.000200  | 0.000138  | 0.000345  | -0.004064 | -0.000372 | 0.000588  | 0.000010  | -0.000159 | 0.000319  | -0.000363 |
| 146 | -0.000041 | 0.000001  | 0.000070  | 0.000090  | 0.000125  | -0.000171 | -0.000016 | 0.000108  | -0.000006 | -0.000041 | 0.000088  | -0.000127 |
| 147 | -0.000238 | -0.000006 | -0.000078 | 0.000039  | -0.000181 | -0.000604 | -0.000124 | 0.000104  | 0.000080  | -0.000067 | -0.000062 | 0.000071  |
| 148 | -0.000329 | -0.000102 | 0.000062  | 0.000233  | 0.000034  | -0.000505 | -0.000164 | 0.000338  | 0.000115  | -0.000167 | 0.000044  | -0.000150 |
| 149 | -0.000427 | -0.000623 | -0.000308 | 0.000305  | 0.000197  | 0.002083  | -0.000125 | 0.000469  | 0.000117  | -0.000133 | -0.000069 | -0.000241 |
| 150 | -0.000325 | -0.000433 | 0.000224  | 0.000391  | 0.000373  | 0.001361  | -0.000134 | 0.000252  | 0.000129  | -0.000107 | -0.000113 | -0.000018 |
| 151 | 0.000294  | -0.000445 | 0.000408  | 0.000518  | 0.000290  | 0.001562  | -0.000046 | 0.000085  | 0.000089  | -0.000021 | -0.000163 | 0.000060  |
| 152 | 0.000890  | -0.000227 | 0.000334  | 0.000071  | 0.001299  | 0.000961  | -0.000092 | 0.000075  | -0.000003 | 0.000090  | -0.000069 | 0.000002  |
| 153 | 0.001212  | 0.000219  | 0.001296  | -0.000495 | 0.002361  | 0.003603  | 0.000298  | -0.000035 | -0.000025 | 0.000077  | -0.000153 | -0.000155 |
| 154 | -0.000867 | 0.000290  | -0.000125 | -0.000348 | -0.000395 | 0.005738  | 0.006733  | 0.002150  | 0.001138  | -0.001689 | -0.000750 | -0.007436 |
| 155 | -0.000250 | 0.000092  | 0.000142  | 0.000076  | 0.000184  | -0.004542 | 0.000099  | 0.000269  | -0.000067 | -0.000008 | 0.000468  | -0.000742 |
| 156 | -0.000093 | -0.000159 | -0.000021 | 0.000071  | 0.000135  | 0.000918  | -0.000182 | 0.000394  | 0.000092  | -0.000098 | -0.000014 | -0.000175 |
| 157 | -0.003727 | 0.000841  | 0.000936  | -0.000124 | 0.001793  | 0.005327  | 0.000767  | -0.000171 | -0.000154 | 0.000054  | -0.000083 | -0.000403 |
| 158 | -0.000003 | -0.000015 | -0.000045 | -0.000075 | -0.000165 | -0.001081 | -0.000347 | 0.000262  | 0.000095  | -0.000034 | -0.000064 | 0.000092  |
| 159 | 0.000365  | 0.000022  | 0.000189  | 0.000280  | 0.000851  | 0.003364  | 0.000825  | -0.000593 | -0.000181 | -0.000003 | 0.000159  | -0.000212 |
| 160 | 0.000335  | 0.000032  | 0.000211  | 0.000313  | 0.000983  | 0.003060  | 0.000727  | -0.000553 | -0.000169 | -0.000001 | 0.000151  | -0.000158 |
| 161 | 0.000083  | 0.000006  | 0.000071  | 0.000109  | 0.000284  | 0.000876  | 0.000319  | -0.000216 | -0.000067 | 0.000024  | 0.000040  | -0.000102 |
| 162 | -0.000163 | 0.000080  | 0.000040  | -0.000003 | 0.000028  | -0.000018 | 0.000016  | 0.000006  | 0.000012  | -0.000016 | -0.000029 | 0.000010  |
| 163 | 0.000116  | 0.000097  | 0.000204  | 0.000344  | 0.000815  | 0.005816  | 0.002006  | -0.001390 | -0.000510 | 0.000180  | 0.000308  | -0.000613 |
| 164 | 0.001223  | -0.001733 | -0.001508 | 0.000788  | -0.000587 | 0.003849  | 0.000472  | -0.001060 | -0.000419 | 0.000571  | -0.000002 | 0.000426  |
| 165 | -0.001533 | 0.000762  | 0.000914  | -0.000194 | -0.000719 | -0.011270 | -0.000421 | -0.000306 | -0.000524 | 0.000548  | 0.001196  | -0.000509 |
| 166 | -0.000076 | -0.000206 | 0.000741  | 0.000652  | 0.000472  | 0.006624  | -0.001219 | -0.001056 | 0.000824  | 0.000232  | -0.002065 | 0.003238  |
| 167 | -0.000259 | 0.000175  | 0.000150  | -0.000292 | 0.000207  | 0.015913  | 0.002370  | -0.003269 | -0.000995 | 0.001584  | -0.000189 | 0.000405  |
| 168 | -0.000100 | 0.000039  | -0.000003 | -0.000006 | -0.000033 | -0.016121 | -0.001538 | 0.001689  | 0.000767  | -0.000614 | -0.000322 | 0.000058  |
| 169 | 0.000148  | -0.000145 | -0.000207 | 0.000028  | -0.000339 | -0.002197 | 0.000057  | 0.000394  | 0.001013  | -0.000371 | -0.001327 | 0.000247  |
| 170 | 0.000188  | 0.000000  | -0.000095 | -0.000286 | 0.000048  | 0.000563  | -0.000349 | -0.000547 | 0.000043  | 0.000307  | -0.000401 | 0.000915  |
| 171 | -0.000027 | 0.000026  | -0.000101 | -0.000104 | -0.000143 | 0.000251  | 0.000029  | -0.000157 | 0.000001  | 0.000062  | -0.000120 | 0.000176  |
| 172 | 0.000342  | 0.000041  | 0.000022  | -0.000163 | 0.000192  | 0.000998  | 0.000113  | -0.000358 | -0.000128 | 0.000177  | 0.000013  | 0.000168  |
| 173 | 0.000026  | -0.000281 | -0.000199 | 0.000026  | -0.000749 | 0.001948  | -0.000323 | 0.000158  | 0.000141  | -0.000033 | -0.000205 | 0.000266  |
| 174 | -0.000304 | 0.000267  | -0.000732 | -0.000739 | -0.000913 | -0.000597 | -0.000031 | 0.000059  | -0.000004 | 0.000011  | 0.000016  | -0.000051 |
| 175 | -0.000779 | -0.000705 | 0.000696  | 0.001945  | 0.000753  | -0.002099 | 0.000080  | -0.000083 | -0.000002 | -0.000147 | 0.000155  | -0.000007 |
| 176 | -0.001065 | 0.000549  | 0.000532  | -0.000824 | 0.000265  | 0.013214  | -0.006420 | 0.002613  | 0.003268  | -0.001677 | -0.005184 | 0.007481  |
| 177 | -0.000600 | 0.000423  | 0.000235  | -0.000019 | -0.000057 | 0.040122  | 0.008344  | -0.005473 | -0.003425 | 0.002569  | 0.003133  | -0.005301 |
| 178 | 0.000188  | -0.000067 | -0.000016 | 0.000306  | -0.000185 | -0.009974 | 0.001049  | 0.001270  | 0.000235  | -0.000836 | 0.000527  | -0.002181 |
| 179 | -0.000424 | -0.000006 | -0.000230 | -0.000126 | -0.000420 | -0.007300 | -0.001002 | 0.000652  | 0.000313  | -0.000234 | -0.000147 | 0.000430  |
| 180 | -0.000264 | 0.000166  | -0.000487 | -0.000360 | -0.000647 | -0.001390 | -0.000465 | -0.000238 | 0.000153  | 0.000027  | -0.000288 | 0.000794  |
| 181 | 0.000697  | 0.000200  | -0.000101 | -0.000430 | 0.000379  | 0.000018  | -0.000313 | 0.000150  | -0.000127 | 0.000182  | 0.000221  | -0.000107 |
| 182 | 0.000707  | 0.000660  | 0.003797  | 0.003301  | 0.002365  | -0.005843 | -0.000424 | 0.000115  | -0.000299 | 0.000183  | 0.000632  | -0.000213 |
| 183 | 0.001186  | -0.002437 | -0.004375 | -0.001552 | -0.000646 | -0.010383 | -0.000597 | 0.000368  | -0.000144 | -0.000142 | 0.000654  | -0.000137 |
| 184 | 0.000455  | 0.000007  | 0.000228  | 0.000329  | 0.000954  | 0.002743  | 0.000606  | -0.000414 | -0.000106 | -0.000030 | 0.000119  | -0.000175 |
| 185 | 0.000394  | 0.000037  | 0.000221  | 0.000346  | 0.001009  | 0.004353  | 0.001076  | -0.000746 | -0.000253 | 0.000006  | 0.000210  | -0.000299 |
| 186 | -0.000143 | -0.000010 | -0.000103 | -0.000141 | -0.000375 | -0.000821 | -0.000275 | 0.000147  | 0.000056  | 0.000002  | -0.000048 | 0.000118  |
| 187 | -0.000258 | -0.000043 | -0.000165 | -0.000293 | -0.000880 | -0.004762 | -0.001157 | 0.000902  | 0.000294  | -0.000046 | -0.000224 | 0.000241  |
| 188 | -0.000460 | 0.000010  | -0.000186 | -0.000248 | -0.000737 | -0.001718 | -0.000317 | 0.000156  | 0.000029  | 0.000064  | -0.000071 | 0.000135  |
| 189 | -0.000018 | 0.000008  | 0.000002  | 0.000013  | -0.000029 | 0.000439  | 0.000182  | -0.000112 | -0.000050 | 0.000006  | 0.000031  | -0.000058 |
| 190 | 0.000017  | -0.000060 | -0.000010 | -0.000011 | 0.000026  | -0.044569 | -0.000431 | 0.000979  | 0.000655  | -0.000082 | -0.000273 | -0.001706 |
| 191 | -0.000105 | -0.000052 | -0.000057 | 0.000029  | -0.000077 | 0.016392  | 0.006923  | -0.002862 | 0.001688  | -0.001230 | -0.001905 | -0.003290 |
| 192 | 0.000021  | -0.000016 | -0.000026 | -0.000017 | -0.000049 | -0.002049 | -0.003509 | 0.002704  | -0.002298 | 0.000011  | -0.000209 | 0.004343  |
| 193 | 0.000057  | -0.000054 | -0.000016 | -0.000026 | -0.000027 | -0.002347 | 0.000195  | -0.002845 | 0.000871  | -0.001639 | 0.004578  | -0.000270 |
| 194 | 0.000114  | -0.000094 | -0.000046 | -0.000052 | -0.000006 | 0.008989  | -0.000813 | -0.000506 | -0.001019 | 0.002045  | -0.003516 | 0.001459  |

|     |           |           |           |           |           |           |           |           |           |           |            |           |
|-----|-----------|-----------|-----------|-----------|-----------|-----------|-----------|-----------|-----------|-----------|------------|-----------|
| 195 | 0.000181  | -0.000106 | -0.000079 | -0.000056 | -0.000164 | -0.045955 | -0.002248 | -0.000250 | 0.001222  | 0.001580  | -0.000964  | 0.002410  |
| 196 | -0.000005 | 0.000008  | -0.000004 | -0.000019 | -0.000027 | 0.007936  | -0.001082 | 0.000644  | -0.000337 | 0.000569  | -0.000176  | 0.000361  |
| 197 | 0.000002  | -0.000024 | -0.000015 | -0.000017 | -0.000042 | 0.001130  | 0.000356  | -0.000292 | -0.000284 | 0.000245  | 0.000003   | -0.000016 |
| 198 | -0.000027 | -0.000007 | -0.000006 | 0.000002  | -0.000024 | -0.000031 | 0.000098  | -0.000001 | -0.000185 | -0.000017 | 0.000019   | 0.000055  |
| 199 | 0.000030  | -0.000038 | -0.000025 | -0.000014 | -0.000024 | -0.000024 | -0.000132 | -0.000221 | 0.000341  | 0.000028  | -0.0000781 | 0.000773  |
| 200 | 0.000050  | -0.000029 | -0.000015 | -0.000007 | -0.000009 | 0.003338  | 0.000585  | -0.000351 | 0.000184  | 0.000185  | 0.001050   | -0.001625 |
| 201 | -0.000111 | 0.000007  | 0.000001  | 0.000038  | 0.000027  | -0.000003 | -0.000118 | 0.000060  | 0.000011  | 0.000010  | 0.000030   | 0.000008  |
| 202 | 0.000030  | -0.000032 | 0.000000  | 0.000025  | -0.000059 | 0.000488  | 0.000064  | -0.000010 | 0.000025  | -0.000019 | -0.000014  | -0.000044 |
| 203 | 0.000060  | -0.000020 | -0.000010 | -0.000011 | -0.000034 | 0.000081  | 0.000082  | 0.000036  | -0.000005 | -0.000006 | 0.000005   | -0.000110 |
| 204 | 0.000014  | -0.000009 | -0.000005 | -0.000025 | -0.000040 | -0.000263 | -0.000007 | 0.000008  | 0.000015  | 0.000031  | -0.000029  | -0.000018 |
| 205 | -0.000068 | -0.000021 | -0.000001 | 0.000000  | -0.000030 | -0.000463 | -0.000237 | -0.000050 | 0.000008  | 0.000018  | 0.000059   | 0.000197  |
| 206 | 0.000014  | -0.000021 | -0.000005 | 0.000034  | -0.000011 | 0.000217  | -0.000165 | -0.000042 | 0.000037  | -0.000019 | 0.000036   | 0.000150  |
| 207 | -0.000002 | -0.000002 | -0.000008 | 0.000001  | -0.000004 | -0.000051 | -0.000057 | 0.000003  | 0.000010  | -0.000002 | 0.000002   | 0.000044  |
| 208 | -0.000001 | -0.000013 | -0.000002 | -0.000001 | -0.000020 | 0.000027  | 0.000027  | -0.000002 | -0.000002 | 0.000000  | -0.000002  | -0.000020 |
| 209 | -0.000008 | 0.000000  | 0.000001  | 0.000004  | -0.000006 | 0.000008  | 0.000012  | -0.000005 | -0.000017 | 0.000013  | 0.000009   | -0.000011 |
| 210 | 0.000010  | -0.000019 | -0.000009 | -0.000004 | -0.000033 | 0.000043  | 0.000018  | -0.000003 | -0.000009 | 0.000003  | 0.000010   | -0.000018 |
| 211 | 0.000007  | -0.000002 | -0.000003 | 0.000003  | -0.000005 | -0.000065 | -0.000068 | -0.000022 | 0.000009  | 0.000010  | 0.000002   | 0.000068  |
| 212 | -0.000094 | 0.000034  | 0.000062  | 0.000125  | 0.000175  | 0.000073  | -0.000053 | 0.000065  | -0.000012 | -0.000020 | 0.000059   | -0.000037 |
| 213 | -0.000167 | 0.000074  | 0.000049  | 0.000099  | 0.000055  | -0.000119 | 0.000039  | -0.000005 | -0.000028 | -0.000002 | 0.000002   | -0.000009 |
| 214 | 0.000002  | -0.000012 | 0.000010  | 0.000042  | -0.000053 | -0.000124 | 0.000107  | -0.000030 | -0.000008 | 0.000009  | -0.000016  | -0.000063 |
| 215 | 0.000048  | 0.000018  | 0.000039  | 0.000017  | 0.000097  | 0.000091  | 0.000006  | 0.000071  | -0.000022 | 0.000005  | -0.000002  | -0.000055 |
| 216 | -0.000056 | 0.000026  | 0.000082  | 0.000092  | 0.000116  | 0.000186  | 0.000047  | 0.000073  | -0.000031 | -0.000016 | 0.000052   | -0.000123 |
| 217 | -0.000059 | 0.000028  | 0.000020  | 0.000068  | 0.000071  | -0.000031 | 0.000007  | 0.000016  | -0.000012 | -0.000027 | 0.000006   | 0.000008  |
| 218 | -0.000031 | 0.000024  | 0.000020  | 0.000025  | 0.000042  | -0.000010 | -0.000010 | 0.000004  | 0.000000  | -0.000004 | 0.000005   | 0.000004  |
| 219 | -0.000058 | 0.000030  | 0.000033  | 0.000035  | 0.000011  | -0.000029 | 0.000046  | 0.000023  | -0.000023 | 0.000006  | 0.000012   | -0.000062 |
| 220 | -0.000023 | 0.000012  | 0.000016  | 0.000023  | 0.000004  | -0.000018 | 0.000015  | 0.000008  | -0.000010 | 0.000000  | 0.000006   | -0.000020 |
| 221 | -0.000003 | 0.000004  | 0.000011  | 0.000021  | 0.000016  | 0.000006  | 0.000018  | 0.000013  | -0.000017 | 0.000002  | 0.000004   | -0.000020 |
| 222 | 0.000012  | 0.000006  | 0.000001  | 0.000015  | 0.000053  | 0.000008  | -0.000038 | 0.000014  | -0.000010 | -0.000003 | 0.000011   | 0.000027  |
| 223 | -0.000309 | 0.005637  | 0.002094  | 0.000299  | 0.005848  | 0.000010  | 0.000163  | 0.000063  | 0.000007  | -0.000011 | -0.000030  | -0.000190 |
| 224 | -0.006232 | 0.003717  | 0.000440  | -0.000042 | 0.002616  | 0.000240  | -0.000011 | 0.000027  | -0.000034 | -0.000004 | 0.000010   | 0.000013  |
| 225 | -0.005605 | -0.001231 | 0.000500  | 0.001383  | -0.002682 | 0.000300  | 0.000071  | 0.000016  | -0.000005 | -0.000018 | -0.000005  | -0.000057 |
| 226 | -0.000387 | -0.001110 | 0.000774  | 0.001032  | -0.001494 | -0.000142 | -0.000076 | 0.000011  | -0.000013 | -0.000002 | 0.000011   | 0.000068  |
| 227 | 0.006586  | -0.001073 | -0.001200 | -0.002124 | -0.001431 | -0.000233 | -0.000092 | -0.000008 | -0.000002 | 0.000025  | 0.000019   | 0.000055  |
| 228 | 0.006794  | -0.001464 | -0.001173 | -0.004125 | -0.001416 | 0.000360  | 0.000102  | 0.000064  | -0.000013 | -0.000029 | 0.000032   | -0.000155 |
| 229 | 0.000609  | 0.000055  | -0.000249 | -0.000076 | 0.002005  | 0.000108  | 0.000035  | 0.000007  | -0.000008 | -0.000011 | -0.000007  | -0.000014 |
| 230 | -0.000094 | 0.000231  | 0.000506  | 0.000236  | 0.000364  | 0.000083  | 0.000031  | 0.000014  | -0.000019 | 0.000000  | -0.000009  | -0.000017 |
| 231 | 0.000218  | 0.000231  | -0.000270 | -0.000275 | -0.000137 | 0.000045  | -0.000015 | 0.000016  | -0.000011 | -0.000003 | 0.000000   | 0.000013  |
| 232 | -0.000110 | 0.000047  | -0.000220 | -0.000300 | -0.000055 | 0.000010  | -0.000009 | 0.000015  | -0.000007 | 0.000004  | 0.000007   | -0.000009 |
| 233 | 0.000612  | 0.000662  | 0.000611  | -0.000021 | 0.000267  | -0.000041 | -0.000002 | 0.000005  | 0.000020  | -0.000015 | 0.000020   | -0.000028 |
| 234 | 0.000400  | -0.000149 | -0.000025 | -0.000141 | -0.000083 | -0.030234 | -0.002193 | -0.004014 | -0.000988 | 0.001558  | -0.000956  | 0.004922  |
| 235 | -0.000261 | -0.000064 | -0.000088 | 0.000089  | -0.000156 | -0.028390 | 0.005062  | 0.004797  | 0.002242  | -0.002879 | -0.005068  | -0.003711 |
| 236 | -0.000136 | 0.000112  | 0.000036  | 0.000062  | 0.000122  | 0.006091  | -0.001048 | 0.001909  | 0.000106  | -0.000677 | 0.000180   | -0.000517 |
| 237 | -0.000083 | 0.000046  | 0.000006  | 0.000036  | 0.000023  | 0.015144  | 0.000591  | 0.001539  | -0.000177 | -0.000735 | 0.000968   | -0.001119 |
| 238 | 0.000014  | -0.000005 | 0.000012  | -0.000017 | -0.000012 | 0.006928  | 0.001340  | -0.002752 | 0.000220  | 0.000833  | 0.000707   | -0.000927 |
| 239 | 0.000014  | 0.000010  | 0.000025  | -0.000008 | 0.000017  | 0.006349  | 0.000629  | -0.001634 | 0.000075  | 0.000851  | 0.001228   | -0.000414 |
| 240 | -0.000014 | -0.000018 | -0.000009 | 0.000002  | -0.000023 | -0.002052 | -0.000038 | 0.001034  | -0.000672 | -0.001290 | -0.000296  | 0.000955  |
| 241 | -0.000008 | -0.000024 | -0.000019 | -0.000004 | -0.000024 | -0.001347 | 0.000030  | 0.000654  | -0.000844 | -0.001090 | 0.000018   | 0.000735  |
| 242 | -0.000016 | 0.000018  | -0.000005 | 0.000012  | 0.000000  | 0.006817  | -0.000060 | 0.000908  | 0.000219  | -0.000231 | -0.000214  | 0.000714  |
| 243 | 0.000019  | -0.000010 | -0.000018 | 0.000005  | -0.000017 | 0.007763  | -0.000486 | 0.000768  | 0.000191  | -0.000651 | -0.001264  | 0.001168  |
| 244 | 0.000038  | 0.000028  | 0.000033  | -0.000022 | 0.000072  | 0.008174  | -0.001735 | -0.001425 | -0.000642 | 0.002019  | 0.002762   | -0.000099 |

|     |           |           |           |           |           |           |           |           |           |           |           |           |
|-----|-----------|-----------|-----------|-----------|-----------|-----------|-----------|-----------|-----------|-----------|-----------|-----------|
| 245 | 0.000032  | 0.000057  | 0.000054  | -0.000013 | 0.000082  | 0.004969  | -0.001560 | -0.002035 | -0.000491 | 0.001873  | 0.002046  | -0.000946 |
| 246 | -0.000200 | -0.000025 | 0.000002  | 0.000003  | -0.000043 | -0.001335 | -0.000353 | -0.000095 | 0.000028  | 0.000029  | 0.000082  | 0.000303  |
| 247 | 0.000072  | -0.000064 | 0.000002  | 0.000095  | -0.000072 | 0.001975  | 0.000282  | 0.000044  | -0.000014 | -0.000107 | 0.000011  | -0.000212 |
| 248 | 0.000048  | 0.000042  | 0.000002  | -0.000001 | 0.000068  | 0.000171  | 0.000066  | 0.000029  | -0.000005 | 0.000012  | -0.000021 | -0.000079 |
| 249 | 0.000059  | 0.000016  | -0.000003 | -0.000009 | 0.000023  | 0.000249  | 0.000144  | 0.000040  | -0.000009 | -0.000004 | -0.000028 | -0.000142 |
| 250 | -0.000021 | -0.000003 | 0.000002  | -0.000006 | -0.000002 | -0.000089 | -0.000013 | 0.000009  | 0.000000  | -0.000001 | -0.000010 | 0.000013  |
| 251 | 0.000001  | 0.000002  | -0.000003 | -0.000020 | -0.000003 | -0.000260 | -0.000023 | -0.000002 | 0.000009  | 0.000022  | -0.000022 | 0.000016  |
| 252 | 0.000004  | -0.000015 | 0.000002  | 0.000002  | -0.000032 | 0.000031  | 0.000009  | -0.000008 | -0.000002 | -0.000008 | 0.000009  | 0.000001  |
| 253 | -0.000003 | -0.000013 | 0.000002  | 0.000004  | -0.000028 | 0.000027  | 0.000016  | -0.000007 | -0.000008 | -0.000006 | 0.000011  | -0.000006 |
| 254 | 0.000034  | -0.000001 | -0.000004 | -0.000001 | -0.000003 | 0.000190  | 0.000084  | 0.000003  | -0.000001 | -0.000011 | -0.000008 | -0.000067 |
| 255 | 0.000024  | -0.000012 | -0.000006 | 0.000002  | -0.000017 | 0.000157  | 0.000098  | 0.000003  | -0.000009 | -0.000007 | 0.000002  | -0.000086 |
| 256 | -0.000002 | 0.000020  | -0.000002 | -0.000040 | 0.000026  | -0.000551 | -0.000139 | 0.000000  | 0.000001  | 0.000040  | -0.000011 | 0.000108  |
| 257 | -0.000016 | 0.000052  | 0.000007  | -0.000027 | 0.000084  | -0.000563 | -0.000173 | -0.000017 | 0.000010  | 0.000042  | -0.000015 | 0.000152  |
| 258 | -0.000062 | 0.000066  | 0.000153  | 0.000064  | 0.000282  | 0.000646  | 0.000078  | 0.000262  | -0.000065 | -0.000044 | 0.000109  | -0.000330 |
| 259 | -0.000307 | 0.000031  | -0.000028 | 0.000140  | -0.000178 | -0.000562 | 0.000033  | -0.000119 | -0.000001 | -0.000028 | -0.000004 | 0.000108  |
| 260 | 0.000090  | -0.000043 | -0.000081 | -0.000058 | -0.000064 | -0.000194 | -0.000066 | -0.000114 | 0.000046  | 0.000019  | -0.000046 | 0.000156  |
| 261 | 0.000063  | -0.000020 | -0.000044 | -0.000037 | -0.000083 | -0.000139 | 0.000012  | -0.000077 | 0.000017  | 0.000020  | -0.000049 | 0.000075  |
| 262 | -0.000027 | 0.000025  | 0.000026  | 0.000006  | 0.000042  | 0.000081  | -0.000029 | 0.000032  | -0.000013 | 0.000002  | 0.000019  | -0.000010 |
| 263 | 0.000038  | -0.000004 | 0.000005  | -0.000018 | 0.000038  | 0.000050  | -0.000022 | 0.000024  | -0.000004 | 0.000008  | 0.000007  | -0.000011 |
| 264 | -0.000043 | 0.000011  | 0.000024  | 0.000027  | -0.000022 | 0.000004  | 0.000051  | 0.000017  | -0.000009 | -0.000006 | 0.000005  | -0.000058 |
| 265 | -0.000040 | 0.000007  | 0.000019  | 0.000021  | -0.000016 | 0.000018  | 0.000060  | 0.000022  | -0.000010 | -0.000005 | 0.000003  | -0.000070 |
| 266 | 0.000040  | -0.000020 | -0.000031 | -0.000027 | -0.000053 | -0.000109 | 0.000027  | -0.000037 | 0.000006  | 0.000010  | -0.000029 | 0.000021  |
| 267 | 0.000011  | -0.000012 | -0.000020 | -0.000011 | -0.000039 | -0.000059 | 0.000013  | -0.000029 | 0.000002  | -0.000002 | -0.000008 | 0.000023  |
| 268 | 0.000103  | -0.000016 | 0.000002  | -0.000039 | 0.000049  | 0.000115  | -0.000097 | 0.000003  | 0.000008  | 0.000015  | 0.000008  | 0.000066  |
| 269 | 0.000135  | -0.000024 | -0.000023 | -0.000069 | 0.000046  | 0.000148  | -0.000060 | 0.000015  | 0.000021  | 0.000012  | -0.000016 | 0.000029  |
| 270 | 0.002865  | -0.000854 | -0.004113 | -0.001406 | 0.000429  | -0.001286 | -0.000349 | 0.000005  | -0.000056 | 0.000104  | 0.000073  | 0.000216  |
| 271 | -0.004745 | 0.001664  | 0.001600  | -0.001116 | 0.002905  | 0.001213  | 0.000337  | 0.000094  | -0.000015 | -0.000044 | -0.000048 | -0.000317 |
| 272 | -0.002407 | 0.000702  | 0.001178  | -0.000266 | 0.000947  | 0.000275  | 0.000225  | 0.000011  | 0.000028  | -0.000029 | -0.000047 | -0.000185 |
| 273 | -0.003416 | -0.000423 | 0.001250  | 0.000132  | 0.001326  | 0.000279  | 0.000165  | 0.000020  | 0.000006  | -0.000030 | -0.000005 | -0.000151 |
| 274 | -0.000296 | 0.000923  | 0.000343  | 0.001758  | -0.000101 | -0.000070 | -0.000086 | -0.000018 | -0.000002 | 0.000002  | 0.000001  | 0.000101  |
| 275 | -0.000001 | 0.000378  | 0.001196  | 0.001058  | -0.000888 | -0.000141 | -0.000134 | -0.000037 | 0.000006  | 0.000002  | 0.000011  | 0.000150  |
| 276 | -0.001105 | 0.001595  | -0.001648 | -0.000071 | -0.000510 | -0.000110 | -0.000100 | -0.000014 | -0.000009 | 0.000014  | 0.000012  | 0.000096  |
| 277 | -0.000495 | 0.001362  | -0.000604 | -0.000187 | -0.000404 | -0.000079 | -0.000072 | -0.000007 | -0.000010 | 0.000013  | 0.000003  | 0.000072  |
| 278 | -0.003443 | -0.003314 | 0.000327  | -0.000071 | -0.000523 | 0.000208  | 0.000152  | 0.000035  | -0.000006 | -0.000009 | -0.000016 | -0.000153 |
| 279 | -0.002459 | -0.004230 | 0.001110  | -0.000276 | -0.000469 | 0.000119  | 0.000153  | 0.000042  | -0.000013 | 0.000007  | -0.000004 | -0.000183 |
| 280 | 0.006103  | 0.001890  | -0.000236 | 0.000619  | -0.001871 | -0.000193 | -0.000148 | -0.000067 | 0.000035  | -0.000011 | 0.000004  | 0.000184  |
| 281 | 0.006765  | 0.002080  | 0.000204  | -0.000369 | -0.001016 | -0.000214 | -0.000144 | -0.000063 | 0.000037  | -0.000020 | 0.000016  | 0.000171  |
| 282 | -0.000082 | 0.000005  | 0.000046  | 0.000053  | 0.000226  | -0.010137 | 0.003776  | 0.069986  | 0.035097  | -0.034969 | -0.067664 | -0.003795 |
| 283 | -0.000096 | 0.000060  | 0.000041  | 0.000009  | 0.000041  | 0.013014  | 0.047766  | 0.024530  | -0.024876 | -0.053218 | 0.005528  | -0.000199 |
| 284 | 0.000063  | -0.000053 | -0.000038 | -0.000016 | -0.000043 | -0.002820 | -0.024155 | 0.024391  | 0.053516  | -0.006120 | 0.006736  | -0.052974 |
| 285 | 0.000027  | -0.000032 | -0.000030 | -0.000012 | -0.000011 | 0.001634  | 0.025333  | 0.050597  | -0.009291 | 0.009718  | -0.051302 | -0.025263 |
| 286 | 0.000007  | -0.000014 | -0.000024 | -0.000015 | -0.000019 | 0.003630  | 0.053400  | -0.008738 | 0.007207  | -0.053167 | -0.024206 | 0.024045  |
| 287 | 0.000013  | -0.000029 | -0.000034 | -0.000027 | -0.000121 | 0.014969  | 0.000148  | 0.005064  | -0.053248 | -0.024294 | 0.025176  | 0.047125  |
| 288 | 0.000021  | 0.000012  | 0.000003  | -0.000099 | -0.000139 | -0.000024 | 0.000163  | 0.000071  | 0.000024  | -0.000017 | -0.000084 | -0.000152 |
| 289 | 0.000028  | -0.000012 | -0.000008 | -0.000034 | -0.000053 | -0.000122 | 0.000042  | 0.000048  | 0.000018  | -0.000010 | -0.000018 | -0.000077 |
| 290 | -0.000017 | 0.000001  | 0.000004  | 0.000023  | 0.000025  | 0.000092  | -0.000005 | -0.000021 | -0.000014 | 0.000003  | 0.000019  | 0.000017  |
| 291 | 0.000001  | 0.000000  | 0.000003  | 0.000002  | -0.000005 | 0.000053  | 0.000057  | 0.000001  | -0.000016 | 0.000008  | -0.000006 | -0.000044 |
| 292 | 0.000002  | 0.000003  | 0.000002  | 0.000006  | 0.000007  | -0.000019 | 0.000056  | -0.000010 | -0.000009 | 0.000007  | -0.000012 | -0.000033 |
| 293 | -0.000027 | 0.000005  | 0.000000  | 0.000035  | 0.000050  | 0.000097  | -0.000011 | -0.000068 | -0.000001 | 0.000017  | 0.000019  | 0.000042  |
| 294 | -0.000002 | 0.000037  | -0.000018 | -0.000017 | -0.000156 | 0.000161  | 0.000195  | 0.000022  | -0.000001 | -0.000018 | -0.000110 | -0.000087 |

|     |           |           |           |           |           |           |           |           |           |           |           |           |
|-----|-----------|-----------|-----------|-----------|-----------|-----------|-----------|-----------|-----------|-----------|-----------|-----------|
| 295 | 0.000009  | 0.000005  | -0.000026 | -0.000054 | -0.000092 | 0.000060  | 0.000067  | 0.000008  | -0.000004 | 0.000006  | -0.000041 | -0.000036 |
| 296 | 0.000013  | 0.000001  | 0.000018  | 0.000024  | 0.000023  | 0.000003  | 0.000012  | -0.000003 | 0.000003  | 0.000000  | 0.000004  | -0.000016 |
| 297 | -0.000024 | 0.000018  | 0.000029  | 0.000032  | 0.000031  | 0.000034  | 0.000029  | 0.000010  | -0.000007 | -0.000001 | 0.000005  | -0.000034 |
| 298 | -0.000056 | 0.000024  | 0.000032  | 0.000048  | 0.000050  | -0.000030 | -0.000041 | 0.000001  | -0.000004 | -0.000003 | 0.000028  | 0.000019  |
| 299 | -0.000080 | 0.000024  | 0.000035  | 0.000051  | 0.000069  | 0.000009  | -0.000069 | -0.000027 | 0.000000  | 0.000005  | 0.000044  | 0.000047  |
| 300 | -0.010166 | -0.007101 | -0.038776 | -0.007366 | 0.010738  | 0.000126  | -0.000234 | -0.000133 | 0.000004  | 0.000021  | 0.000111  | 0.000226  |
| 301 | 0.253552  | 0.000698  | -0.005497 | -0.025610 | -0.005260 | -0.000242 | 0.000026  | -0.000028 | -0.000004 | 0.000032  | 0.000052  | -0.000079 |
| 302 | 0.000698  | 0.247345  | 0.000850  | 0.007938  | 0.024910  | 0.000057  | -0.000014 | -0.000006 | 0.000004  | -0.000012 | -0.000019 | 0.000047  |
| 303 | -0.005497 | 0.000850  | 0.246925  | 0.000566  | 0.005774  | 0.000029  | 0.000002  | 0.000000  | 0.000005  | -0.000005 | -0.000012 | 0.000010  |
| 304 | -0.025610 | 0.007938  | 0.000566  | 0.247334  | -0.000629 | -0.000010 | -0.000009 | 0.000014  | 0.000006  | 0.000000  | -0.000017 | 0.000007  |
| 305 | -0.005260 | 0.024910  | 0.005774  | -0.000629 | 0.251405  | -0.000097 | 0.000089  | 0.000013  | 0.000017  | 0.000021  | -0.000057 | -0.000081 |
| 306 | -0.000242 | 0.000057  | 0.000029  | -0.000010 | -0.000097 | 0.113693  | 0.010930  | -0.006918 | -0.005366 | -0.001948 | 0.001735  | 0.001393  |
| 307 | 0.000026  | -0.000014 | 0.000002  | -0.000009 | 0.000089  | 0.010930  | 0.187213  | -0.103714 | 0.002460  | 0.013588  | -0.002207 | -0.098435 |
| 308 | -0.000028 | -0.000006 | 0.000000  | 0.000014  | 0.000013  | -0.006918 | -0.103714 | 0.197762  | -0.103258 | 0.000420  | 0.012302  | -0.001703 |
| 309 | -0.000004 | 0.000004  | 0.000005  | 0.000006  | 0.000017  | -0.005366 | 0.002460  | -0.103258 | 0.192578  | -0.105681 | 0.000233  | 0.013678  |
| 310 | 0.000032  | -0.000012 | -0.000005 | 0.000000  | 0.000021  | -0.001948 | 0.013588  | 0.000420  | -0.105681 | 0.192796  | -0.103481 | 0.002018  |
| 311 | 0.000052  | -0.000019 | -0.000012 | -0.000017 | -0.000057 | 0.001735  | -0.002207 | 0.012302  | 0.000233  | -0.103481 | 0.196504  | -0.102510 |
| 312 | -0.000079 | 0.000047  | 0.000010  | 0.000007  | -0.000081 | 0.001393  | -0.098435 | -0.001703 | 0.013678  | 0.002018  | -0.102510 | 0.185790  |
| 313 | 0.000092  | -0.000011 | -0.000011 | -0.000024 | 0.000011  | -0.000406 | -0.000201 | 0.000058  | 0.000003  | 0.000018  | 0.000012  | 0.000114  |
| 314 | 0.000008  | 0.000008  | 0.000008  | -0.000053 | -0.000077 | -0.000103 | 0.000224  | 0.000065  | -0.000010 | -0.000002 | -0.000051 | -0.000222 |
| 315 | 0.000002  | -0.000005 | -0.000003 | -0.000002 | -0.000013 | 0.000049  | -0.000050 | -0.000015 | 0.000018  | -0.000001 | -0.000002 | 0.000050  |
| 316 | 0.000004  | 0.000001  | 0.000000  | -0.000002 | 0.000006  | 0.000006  | -0.000008 | 0.000011  | -0.000010 | -0.000006 | 0.000006  | 0.000008  |
| 317 | -0.000001 | 0.000005  | 0.000005  | -0.000004 | -0.000007 | 0.000016  | 0.000021  | 0.000011  | -0.000008 | 0.000003  | -0.000008 | -0.000019 |
| 318 | -0.000018 | -0.000004 | 0.000000  | 0.000022  | 0.000027  | -0.000015 | -0.000030 | -0.000025 | 0.000006  | 0.000002  | 0.000024  | 0.000023  |
| 319 | 0.000006  | -0.000005 | -0.000009 | 0.000038  | 0.000064  | 0.000056  | -0.000156 | -0.000047 | 0.000005  | 0.000005  | 0.000031  | 0.000160  |
| 320 | -0.000161 | 0.000084  | 0.000015  | -0.000017 | 0.000017  | 0.000418  | -0.000025 | -0.000048 | -0.000037 | 0.000015  | 0.000053  | 0.000043  |
| 321 | -0.000069 | 0.000060  | 0.000026  | 0.000024  | -0.000005 | 0.000146  | 0.000144  | 0.000047  | -0.000023 | -0.000003 | -0.000055 | -0.000108 |
| 322 | 0.000040  | -0.000015 | -0.000010 | -0.000020 | -0.000068 | 0.000004  | 0.000043  | -0.000010 | 0.000004  | 0.000003  | -0.000020 | -0.000019 |
| 323 | 0.000021  | -0.000011 | -0.000011 | -0.000003 | 0.000004  | -0.000024 | -0.000039 | -0.000003 | 0.000011  | -0.000008 | 0.000005  | 0.000034  |
| 324 | -0.000014 | 0.000009  | 0.000010  | 0.000016  | 0.000031  | 0.000003  | 0.000024  | 0.000012  | -0.000008 | 0.000000  | 0.000001  | -0.000028 |
| 325 | 0.000027  | -0.000012 | -0.000003 | -0.000016 | -0.000007 | 0.000019  | 0.000021  | 0.000002  | -0.000002 | 0.000008  | -0.000008 | -0.000020 |
| 326 | -0.000005 | -0.000032 | -0.000014 | 0.000000  | 0.000044  | -0.000150 | -0.000193 | -0.000048 | 0.000019  | 0.000001  | 0.000077  | 0.000142  |
| 327 | 0.015802  | -0.005393 | -0.000104 | 0.002831  | 0.014537  | -0.000695 | 0.000306  | 0.000011  | 0.000038  | 0.000106  | -0.000126 | -0.000335 |
| 328 | 0.046044  | -0.023312 | 0.024924  | 0.053001  | 0.000628  | 0.000065  | -0.000046 | -0.000007 | -0.000004 | -0.000009 | 0.000035  | 0.000030  |
| 329 | 0.024925  | 0.024223  | 0.051505  | -0.007882 | 0.005985  | -0.000033 | -0.000013 | -0.000055 | 0.000005  | 0.000021  | 0.000010  | 0.000032  |
| 330 | -0.024482 | 0.053040  | -0.009883 | 0.007058  | -0.053754 | 0.000021  | -0.000077 | 0.000003  | -0.000002 | -0.000011 | 0.000015  | 0.000071  |
| 331 | -0.053411 | -0.006153 | 0.009429  | -0.053623 | -0.024236 | 0.000139  | 0.000032  | 0.000021  | -0.000005 | -0.000019 | -0.000005 | -0.000024 |
| 332 | 0.004164  | 0.007611  | -0.050437 | -0.024315 | 0.024185  | -0.000054 | 0.000033  | 0.000003  | 0.000000  | 0.000003  | -0.000028 | -0.000010 |
| 333 | 0.002544  | -0.053946 | -0.025308 | 0.024386  | 0.046790  | -0.000134 | 0.000073  | 0.000035  | 0.000006  | 0.000015  | -0.000027 | -0.000100 |

|   | 313       | 314       | 315       | 316       | 317       | 318       | 319       | 320       | 321       | 322       | 323       | 324       |
|---|-----------|-----------|-----------|-----------|-----------|-----------|-----------|-----------|-----------|-----------|-----------|-----------|
| 1 | -0.000027 | -0.000383 | 0.000067  | 0.000115  | 0.000069  | 0.000039  | 0.000099  | 0.000514  | 0.000101  | -0.000233 | -0.000131 | -0.000032 |
| 2 | 0.002631  | 0.001224  | -0.000646 | -0.000449 | -0.000005 | 0.000239  | -0.000376 | -0.004110 | -0.001948 | 0.001351  | 0.000661  | 0.000046  |
| 3 | -0.013884 | -0.001125 | 0.000358  | 0.000264  | -0.000071 | -0.000561 | 0.001133  | 0.012800  | 0.001242  | 0.000295  | -0.000130 | -0.000053 |
| 4 | -0.016755 | 0.006148  | 0.004528  | 0.003533  | -0.003404 | -0.005317 | -0.005343 | 0.013771  | -0.001305 | 0.000465  | 0.000167  | -0.000247 |
| 5 | 0.003657  | -0.005943 | -0.004782 | -0.003562 | 0.003432  | 0.005225  | 0.005463  | 0.015636  | 0.005306  | 0.004999  | 0.003156  | -0.003469 |
| 6 | -0.012860 | 0.001182  | -0.000254 | 0.000060  | 0.000033  | -0.000238 | -0.000782 | -0.004562 | -0.005464 | -0.004884 | -0.003145 | 0.003435  |
| 7 | 0.001057  | 0.000107  | 0.000183  | 0.000012  | -0.000099 | -0.000245 | 0.000041  | 0.000004  | 0.000323  | -0.000046 | -0.000073 | 0.000090  |
| 8 | -0.001758 | 0.000963  | -0.000449 | 0.000105  | 0.000081  | -0.000198 | -0.000505 | 0.001410  | 0.001787  | -0.000650 | 0.000131  | 0.000122  |

|    |           |           |           |           |           |           |           |           |           |           |           |           |
|----|-----------|-----------|-----------|-----------|-----------|-----------|-----------|-----------|-----------|-----------|-----------|-----------|
| 9  | -0.001030 | -0.001959 | 0.000954  | -0.000130 | -0.000170 | 0.000195  | 0.001113  | 0.000913  | -0.000796 | 0.000368  | -0.000028 | -0.000068 |
| 10 | 0.007630  | 0.001959  | -0.002652 | -0.001057 | 0.001082  | 0.001350  | -0.000732 | 0.001431  | 0.000262  | 0.000173  | -0.000092 | -0.000115 |
| 11 | -0.035658 | 0.004535  | 0.010555  | 0.006735  | -0.006467 | -0.010821 | -0.004274 | 0.001498  | -0.000853 | -0.000179 | 0.000208  | 0.000172  |
| 12 | -0.002141 | -0.005484 | -0.008770 | -0.006146 | 0.005976  | 0.010442  | 0.003720  | -0.008334 | 0.000767  | -0.001271 | -0.001078 | 0.001018  |
| 13 | 0.002102  | -0.000903 | 0.001013  | 0.000911  | -0.000804 | -0.002121 | 0.001928  | 0.033892  | 0.004506  | 0.010177  | 0.005968  | -0.006395 |
| 14 | -0.000913 | 0.001237  | 0.000034  | -0.000123 | -0.000215 | 0.000724  | -0.001652 | 0.005270  | -0.003058 | -0.010210 | -0.005740 | 0.006045  |
| 15 | -0.001112 | -0.000567 | 0.000108  | 0.000037  | 0.000052  | -0.000382 | 0.000750  | -0.003353 | -0.001936 | 0.001952  | 0.000863  | -0.000843 |
| 16 | 0.001132  | -0.000307 | -0.000014 | -0.000029 | -0.000096 | 0.000435  | 0.000007  | -0.001053 | -0.000482 | -0.000027 | -0.000050 | 0.000119  |
| 17 | 0.004231  | 0.000063  | 0.000009  | -0.000130 | 0.000063  | -0.000110 | 0.000105  | -0.003829 | -0.000059 | -0.000122 | 0.000091  | -0.000047 |
| 18 | 0.001186  | 0.000569  | -0.000163 | 0.000072  | -0.000076 | 0.000284  | -0.000679 | -0.000715 | 0.000302  | -0.000061 | 0.000019  | 0.000113  |
| 19 | 0.050062  | 0.001403  | -0.005393 | -0.002781 | 0.002795  | 0.004424  | -0.000552 | -0.000958 | -0.000066 | -0.000505 | 0.000096  | 0.000033  |
| 20 | 0.005532  | -0.003709 | 0.001693  | -0.000377 | -0.000185 | -0.000115 | 0.002687  | -0.003969 | -0.000160 | 0.000133  | -0.000053 | 0.000107  |
| 21 | -0.046082 | 0.002890  | 0.003705  | 0.003983  | -0.002992 | -0.005946 | -0.001537 | -0.001120 | 0.000736  | -0.000287 | 0.000047  | -0.000046 |
| 22 | -0.032456 | -0.001690 | -0.004548 | -0.002727 | 0.003661  | 0.002934  | 0.002257  | -0.048180 | 0.000553  | -0.004139 | -0.002634 | 0.002559  |
| 23 | 0.005101  | 0.003026  | -0.000464 | -0.000315 | -0.000220 | 0.002193  | -0.004214 | -0.006505 | -0.002745 | 0.000201  | 0.000188  | 0.000374  |
| 24 | 0.034868  | -0.001041 | 0.003342  | 0.002378  | -0.002222 | -0.003671 | 0.001291  | 0.043319  | 0.001771  | 0.005443  | 0.002643  | -0.003652 |
| 25 | 0.001273  | -0.000717 | 0.000329  | -0.000133 | 0.000050  | -0.000014 | 0.000483  | 0.034444  | -0.002309 | -0.002844 | -0.003612 | 0.002612  |
| 26 | 0.003972  | -0.000056 | -0.000209 | 0.000015  | -0.000071 | 0.000177  | 0.000142  | -0.004839 | 0.004229  | -0.002134 | 0.000298  | 0.000301  |
| 27 | 0.000814  | -0.000066 | 0.000394  | -0.000106 | -0.000027 | 0.000066  | -0.000254 | -0.037643 | -0.001219 | 0.003690  | 0.002248  | -0.002340 |
| 28 | 0.012466  | 0.001529  | -0.001397 | 0.000019  | 0.000438  | -0.000238 | -0.000360 | -0.006084 | 0.000764  | -0.000890 | 0.000210  | -0.000100 |
| 29 | 0.010684  | -0.000106 | 0.000964  | -0.000457 | -0.000385 | 0.000889  | -0.000898 | -0.005550 | -0.000649 | 0.000385  | -0.000159 | 0.000294  |
| 30 | -0.083185 | -0.007236 | 0.009947  | 0.004766  | -0.003857 | -0.013838 | 0.010355  | -0.011566 | 0.000633  | 0.000287  | -0.000454 | -0.000090 |
| 31 | -0.054805 | 0.009847  | -0.012031 | -0.003525 | 0.004199  | 0.008820  | -0.007532 | -0.010804 | 0.000617  | -0.000944 | 0.000296  | 0.000542  |
| 32 | 0.008850  | -0.000628 | 0.000919  | -0.000557 | -0.000377 | 0.001882  | -0.001234 | 0.081681  | -0.010344 | 0.013126  | 0.003589  | -0.004383 |
| 33 | 0.011568  | -0.000994 | -0.000505 | 0.000274  | 0.000218  | -0.000958 | 0.001954  | 0.059633  | 0.007673  | -0.008476 | -0.004039 | 0.003245  |
| 34 | 0.006405  | 0.000522  | -0.000578 | 0.000091  | -0.000229 | 0.000944  | -0.000756 | -0.009049 | 0.001157  | -0.001800 | 0.000464  | 0.000551  |
| 35 | 0.006000  | -0.000670 | 0.000691  | -0.000260 | 0.000157  | -0.000505 | 0.000589  | -0.011407 | -0.001537 | 0.000987  | -0.000132 | -0.000373 |
| 36 | -0.000016 | -0.000140 | -0.000034 | 0.000012  | -0.000014 | 0.000032  | 0.000145  | 0.000075  | -0.000060 | -0.000038 | -0.000004 | 0.000016  |
| 37 | 0.000094  | 0.000038  | 0.000019  | 0.000010  | -0.000019 | -0.000009 | -0.000039 | -0.000002 | 0.000013  | -0.000001 | 0.000002  | 0.000007  |
| 38 | 0.000116  | -0.000342 | 0.000036  | 0.000060  | -0.000021 | -0.000029 | 0.000297  | 0.000019  | -0.000160 | -0.000035 | 0.000018  | -0.000014 |
| 39 | 0.017581  | -0.001405 | -0.000753 | -0.001460 | 0.001153  | 0.002014  | 0.000411  | -0.000010 | -0.000019 | 0.000000  | 0.000016  | -0.000014 |
| 40 | 0.011451  | 0.000738  | 0.001543  | 0.000968  | -0.001172 | 0.000101  | -0.002117 | -0.000069 | -0.000130 | 0.000053  | 0.000013  | -0.000046 |
| 41 | 0.000147  | 0.000177  | -0.000037 | -0.000034 | 0.000037  | 0.000059  | -0.000202 | -0.017683 | -0.000354 | -0.001995 | -0.001108 | 0.001455  |
| 42 | 0.000043  | 0.000028  | 0.000025  | -0.000042 | 0.000011  | 0.000030  | -0.000050 | -0.012749 | 0.002217  | -0.000177 | 0.001166  | -0.000958 |
| 43 | -0.000023 | -0.000017 | 0.000001  | -0.000003 | -0.000004 | 0.000004  | 0.000019  | -0.000112 | 0.000233  | -0.000053 | -0.000031 | 0.000021  |
| 44 | 0.000452  | 0.000145  | -0.000117 | 0.000052  | 0.000013  | -0.000024 | -0.000071 | -0.000152 | 0.000050  | -0.000048 | 0.000024  | 0.000042  |
| 45 | 0.040146  | -0.001467 | -0.000162 | 0.002896  | 0.001479  | -0.002714 | -0.000036 | -0.000719 | 0.000061  | -0.000033 | -0.000005 | 0.000008  |
| 46 | 0.000420  | 0.000050  | 0.000054  | -0.000010 | 0.000023  | -0.000098 | -0.000020 | -0.038048 | -0.000198 | 0.002508  | -0.001575 | -0.003042 |
| 47 | -0.000045 | -0.000130 | 0.000058  | -0.000006 | -0.000034 | 0.000032  | 0.000083  | -0.000392 | 0.000041  | 0.000155  | -0.000044 | -0.000035 |
| 48 | -0.000293 | -0.000118 | -0.000052 | 0.000013  | 0.000018  | -0.000112 | 0.000254  | -0.000980 | 0.000141  | 0.000010  | -0.000103 | 0.000053  |
| 49 | 0.001481  | -0.000070 | 0.000137  | 0.000003  | -0.000153 | -0.000245 | 0.000319  | -0.000416 | 0.000074  | -0.000024 | 0.000006  | 0.000092  |
| 50 | 0.001933  | -0.000020 | 0.000143  | 0.000002  | -0.000256 | -0.000277 | 0.000402  | 0.000118  | 0.000031  | 0.000026  | 0.000070  | 0.000028  |
| 51 | 0.000428  | -0.000048 | 0.000035  | -0.000010 | -0.000082 | -0.000069 | 0.000173  | -0.000454 | 0.000068  | -0.000062 | -0.000012 | 0.000039  |
| 52 | -0.000262 | -0.000216 | -0.000083 | 0.000069  | 0.000053  | -0.000131 | 0.000311  | 0.000036  | -0.000047 | 0.000063  | -0.000087 | -0.000081 |
| 53 | 0.000202  | 0.000057  | 0.000037  | -0.000030 | -0.000009 | -0.000022 | -0.000032 | -0.001774 | 0.000169  | -0.000035 | -0.000059 | 0.000125  |
| 54 | 0.000131  | -0.000020 | 0.000019  | -0.000001 | -0.000027 | -0.000010 | 0.000039  | -0.000116 | 0.000014  | -0.000006 | -0.000010 | 0.000019  |
| 55 | 0.000169  | -0.000027 | -0.000001 | 0.000023  | -0.000008 | -0.000085 | 0.000095  | 0.000045  | -0.000005 | 0.000003  | -0.000020 | 0.000004  |
| 56 | 0.000262  | 0.000038  | 0.000036  | 0.000001  | -0.000040 | -0.000032 | -0.000003 | -0.000052 | 0.000005  | -0.000024 | 0.000010  | 0.000009  |
| 57 | 0.000052  | -0.000015 | -0.000003 | 0.000008  | -0.000011 | -0.000002 | 0.000023  | 0.000046  | -0.000004 | 0.000004  | -0.000003 | -0.000007 |
| 58 | -0.000019 | 0.000023  | 0.000011  | -0.000003 | -0.000006 | 0.000020  | -0.000045 | -0.000015 | 0.000006  | 0.000006  | 0.000001  | -0.000001 |

|     |           |           |           |           |           |           |           |           |           |           |           |           |
|-----|-----------|-----------|-----------|-----------|-----------|-----------|-----------|-----------|-----------|-----------|-----------|-----------|
| 59  | 0.000168  | -0.000071 | 0.000011  | 0.000006  | -0.000040 | -0.000006 | 0.000101  | -0.000008 | -0.000040 | -0.000005 | 0.000003  | 0.000002  |
| 60  | -0.000138 | 0.000015  | 0.000016  | 0.000003  | -0.000001 | 0.000038  | -0.000068 | -0.001047 | -0.000041 | 0.000042  | -0.000014 | -0.000058 |
| 61  | 0.005077  | 0.000075  | -0.000256 | 0.000131  | -0.000236 | -0.001038 | 0.001330  | -0.008674 | -0.000532 | 0.000192  | -0.000149 | 0.000580  |
| 62  | -0.004475 | 0.000220  | 0.000149  | -0.000205 | 0.000380  | 0.000819  | -0.001349 | 0.005453  | 0.000212  | -0.000061 | 0.000265  | -0.000406 |
| 63  | -0.004723 | 0.000499  | -0.000583 | 0.000038  | 0.000650  | 0.000487  | -0.001082 | 0.005134  | 0.001252  | -0.000731 | -0.000495 | -0.000030 |
| 64  | 0.003921  | -0.000013 | 0.000325  | -0.000063 | -0.000383 | -0.000740 | 0.000880  | -0.008024 | -0.000733 | 0.000355  | 0.000413  | 0.000121  |
| 65  | 0.002211  | -0.000667 | 0.000254  | -0.000003 | -0.000369 | -0.000317 | 0.001118  | -0.007204 | -0.000351 | 0.000250  | 0.000099  | 0.000291  |
| 66  | -0.003891 | 0.000236  | -0.000403 | 0.000086  | 0.000329  | 0.000839  | -0.001111 | 0.007517  | 0.000364  | -0.000109 | -0.000195 | -0.000370 |
| 67  | -0.001636 | 0.000114  | 0.000559  | -0.000190 | -0.000033 | 0.000945  | -0.001428 | 0.011687  | -0.000336 | 0.000276  | 0.000535  | -0.000842 |
| 68  | 0.003671  | -0.000406 | -0.000108 | 0.000177  | -0.000313 | -0.000910 | 0.001563  | -0.004222 | 0.000111  | -0.000122 | -0.000477 | 0.000642  |
| 69  | 0.001887  | -0.000887 | 0.000889  | 0.000362  | -0.000380 | -0.000875 | 0.000907  | -0.017459 | 0.000042  | -0.000488 | 0.000042  | 0.000162  |
| 70  | -0.023748 | 0.000415  | -0.000309 | 0.000188  | 0.000143  | -0.000730 | 0.000285  | -0.002524 | -0.000764 | 0.000796  | 0.000241  | -0.000240 |
| 71  | 0.003845  | 0.000546  | -0.000555 | -0.000348 | 0.000241  | 0.001135  | -0.001027 | 0.022923  | -0.000321 | 0.000775  | -0.000078 | -0.000228 |
| 72  | 0.018041  | -0.000140 | 0.000003  | -0.000196 | -0.000039 | 0.000521  | -0.000152 | -0.002229 | 0.001024  | -0.001055 | -0.000208 | 0.000280  |
| 73  | -0.006615 | -0.000187 | -0.000018 | 0.000059  | 0.000049  | -0.000196 | 0.000290  | 0.012981  | 0.001163  | 0.000066  | -0.000284 | 0.000011  |
| 74  | 0.003634  | 0.000055  | 0.000049  | -0.000120 | -0.000011 | 0.000223  | -0.000196 | -0.003562 | -0.000182 | -0.000085 | 0.000084  | 0.000018  |
| 75  | 0.003649  | 0.000261  | -0.000047 | -0.000099 | 0.000012  | 0.000186  | -0.000311 | -0.003468 | 0.000051  | -0.000135 | 0.000091  | 0.000039  |
| 76  | -0.014109 | -0.001465 | 0.000554  | 0.000427  | -0.000152 | -0.000610 | 0.001249  | 0.006155  | 0.000145  | 0.000205  | -0.000006 | -0.000079 |
| 77  | 0.042379  | 0.001895  | -0.005150 | -0.003386 | 0.002668  | 0.005869  | -0.002005 | 0.006125  | -0.000259 | 0.000137  | -0.000026 | -0.000055 |
| 78  | -0.000167 | -0.000330 | 0.000711  | 0.000457  | -0.000358 | -0.001192 | 0.000725  | -0.003488 | 0.000174  | -0.000210 | 0.000020  | 0.000109  |
| 79  | -0.029406 | -0.002237 | 0.003651  | 0.002529  | -0.001860 | -0.004354 | 0.002345  | -0.003599 | 0.000329  | -0.000162 | -0.000014 | 0.000102  |
| 80  | -0.028822 | 0.011535  | 0.004067  | 0.003868  | -0.003839 | -0.005009 | -0.010443 | 0.013776  | -0.001194 | 0.000595  | 0.000148  | -0.000365 |
| 81  | -0.006762 | -0.010929 | -0.004137 | -0.003691 | 0.003512  | 0.003845  | 0.011218  | -0.041444 | 0.001803  | -0.005616 | -0.002560 | 0.003226  |
| 82  | -0.017498 | 0.002003  | -0.003281 | -0.001601 | 0.002018  | 0.002587  | -0.001792 | -0.000754 | -0.000760 | 0.001228  | 0.000295  | -0.000436 |
| 83  | 0.001096  | 0.000446  | -0.001012 | -0.000392 | 0.000494  | 0.000953  | -0.000509 | 0.027485  | -0.002253 | 0.004169  | 0.001718  | -0.002374 |
| 84  | 0.026609  | -0.001671 | 0.004606  | 0.002386  | -0.002808 | -0.004067 | 0.001654  | 0.027981  | 0.010498  | 0.004710  | 0.003639  | -0.003863 |
| 85  | -0.012577 | 0.001556  | -0.000325 | 0.000016  | 0.000181  | -0.000180 | -0.001245 | 0.007677  | -0.010918 | -0.003769 | -0.003355 | 0.003698  |
| 86  | 0.003683  | -0.000368 | 0.000133  | -0.000025 | -0.000078 | 0.000115  | 0.000221  | 0.019501  | 0.001940  | -0.002649 | -0.001976 | 0.001524  |
| 87  | 0.003568  | -0.000180 | 0.000161  | -0.000056 | -0.000084 | 0.000189  | -0.000029 | -0.000958 | 0.000637  | -0.000965 | -0.000404 | 0.000365  |
| 88  | -0.006803 | 0.000349  | -0.000020 | 0.000097  | 0.000009  | -0.000231 | -0.000199 | -0.029095 | -0.001828 | 0.003984  | 0.002793  | -0.002285 |
| 89  | 0.005586  | 0.000928  | -0.000205 | -0.000097 | -0.000012 | 0.000016  | -0.000628 | -0.003409 | -0.000173 | -0.000023 | -0.000019 | -0.000031 |
| 90  | 0.003878  | -0.000048 | 0.000933  | -0.000546 | -0.000548 | 0.001052  | -0.000788 | -0.005275 | 0.000645  | -0.000042 | -0.000026 | 0.000095  |
| 91  | 0.004250  | -0.001052 | -0.000026 | -0.000062 | -0.000047 | 0.000231  | 0.000949  | -0.004903 | 0.000776  | -0.001074 | 0.000512  | 0.000649  |
| 92  | 0.003540  | -0.000053 | -0.000099 | 0.000006  | 0.000027  | 0.000021  | 0.000096  | -0.004386 | -0.000910 | -0.000237 | 0.000087  | 0.000058  |
| 93  | -0.001818 | -0.000072 | -0.000039 | 0.000065  | 0.000006  | -0.000107 | 0.000147  | 0.001772  | 0.000083  | 0.000024  | -0.000047 | -0.000002 |
| 94  | -0.001814 | 0.000017  | -0.000011 | 0.000054  | 0.000006  | -0.000116 | 0.000050  | 0.001789  | 0.000099  | 0.000062  | -0.000037 | -0.000016 |
| 95  | -0.001733 | -0.000123 | 0.000014  | 0.000040  | -0.000004 | -0.000083 | 0.000155  | 0.001688  | -0.000051 | 0.000056  | -0.000043 | -0.000019 |
| 96  | -0.001854 | -0.000137 | 0.000026  | 0.000061  | -0.000007 | -0.000103 | 0.000160  | 0.001711  | 0.000002  | 0.000082  | -0.000047 | -0.000022 |
| 97  | 0.000044  | 0.000195  | -0.000343 | -0.000248 | 0.000160  | 0.000605  | -0.000376 | 0.001753  | -0.000148 | 0.000089  | -0.000012 | -0.000057 |
| 98  | 0.000239  | 0.000143  | -0.000375 | -0.000209 | 0.000198  | 0.000583  | -0.000348 | 0.001740  | -0.000026 | 0.000121  | -0.000008 | -0.000053 |
| 99  | 0.021941  | 0.001242  | -0.003029 | -0.001539 | 0.001440  | 0.002650  | -0.000819 | 0.001741  | -0.000207 | 0.000068  | 0.000010  | -0.000048 |
| 100 | 0.007416  | 0.000979  | -0.000618 | -0.000982 | 0.000423  | 0.001698  | -0.001519 | 0.001815  | -0.000119 | 0.000094  | 0.000002  | -0.000052 |
| 101 | 0.003499  | -0.001435 | 0.001277  | 0.000363  | -0.000692 | -0.000412 | 0.000927  | 0.000192  | 0.000450  | -0.000602 | -0.000137 | 0.000242  |
| 102 | 0.014171  | -0.000572 | 0.002002  | 0.001242  | -0.001337 | -0.002206 | 0.000909  | 0.000122  | 0.000298  | -0.000616 | -0.000170 | 0.000204  |
| 103 | -0.000387 | -0.000191 | 0.000500  | 0.000215  | -0.000246 | -0.000509 | 0.000240  | -0.020758 | 0.000789  | -0.002493 | -0.001301 | 0.001421  |
| 104 | -0.000640 | -0.000253 | 0.000503  | 0.000180  | -0.000247 | -0.000455 | 0.000282  | -0.006706 | 0.001465  | -0.001678 | -0.000414 | 0.000954  |
| 105 | -0.001834 | 0.000198  | -0.000068 | 0.000012  | 0.000040  | -0.000053 | -0.000129 | -0.004222 | -0.001056 | 0.000501  | 0.000723  | -0.000362 |
| 106 | -0.001849 | 0.000169  | -0.000062 | 0.000013  | 0.000036  | -0.000061 | -0.000093 | -0.015290 | -0.000892 | 0.002152  | 0.001259  | -0.001164 |
| 107 | -0.001770 | 0.000035  | -0.000092 | 0.000026  | 0.000042  | -0.000081 | 0.000070  | 0.000384  | -0.000297 | 0.000502  | 0.000201  | -0.000204 |
| 108 | -0.001770 | 0.000148  | -0.000070 | 0.000031  | 0.000042  | -0.000110 | -0.000042 | 0.000681  | -0.000311 | 0.000438  | 0.000200  | -0.000153 |



|     |           |           |           |           |           |           |           |           |           |           |           |           |
|-----|-----------|-----------|-----------|-----------|-----------|-----------|-----------|-----------|-----------|-----------|-----------|-----------|
| 109 | -0.002844 | -0.000941 | 0.000206  | 0.000095  | -0.000075 | 0.000167  | 0.000546  | 0.001517  | -0.000230 | -0.000062 | 0.000105  | -0.000046 |
| 110 | -0.002600 | 0.000013  | 0.000001  | 0.000002  | 0.000083  | -0.000187 | 0.000088  | 0.001874  | 0.000401  | 0.000087  | -0.000085 | 0.000075  |
| 111 | -0.019780 | -0.021049 | 0.012031  | 0.003819  | -0.003215 | -0.013190 | 0.021745  | 0.002887  | -0.000355 | -0.000143 | 0.000141  | -0.000107 |
| 112 | 0.015348  | 0.021286  | -0.012922 | -0.003231 | 0.003740  | 0.012081  | -0.021145 | 0.002164  | -0.000302 | 0.000187  | -0.000109 | 0.000012  |
| 113 | -0.002296 | 0.000370  | 0.000030  | 0.000086  | -0.000004 | -0.000045 | -0.000432 | 0.019512  | -0.022021 | 0.012541  | 0.003096  | -0.003765 |
| 114 | -0.001964 | 0.000674  | 0.000001  | -0.000019 | 0.000048  | -0.000184 | -0.000517 | -0.014450 | 0.021323  | -0.011437 | -0.003589 | 0.003094  |
| 115 | -0.001577 | -0.000434 | 0.000124  | 0.000050  | -0.000107 | 0.000090  | 0.000275  | 0.001848  | 0.000314  | 0.000017  | 0.000041  | -0.000065 |
| 116 | -0.001966 | 0.000496  | -0.000021 | -0.000055 | 0.000080  | -0.000116 | -0.000380 | 0.002522  | 0.000611  | 0.000208  | -0.000127 | 0.000008  |
| 117 | 0.002265  | 0.000229  | 0.000294  | -0.000056 | -0.000228 | -0.000213 | -0.000038 | 0.002914  | -0.000049 | 0.000026  | 0.000169  | 0.000003  |
| 118 | 0.001239  | 0.000110  | 0.000123  | -0.000018 | -0.000138 | -0.000185 | 0.000104  | 0.000328  | 0.000090  | 0.000036  | 0.000050  | 0.000044  |
| 119 | 0.001152  | 0.000109  | 0.000122  | -0.000021 | -0.000124 | -0.000116 | 0.000024  | -0.000001 | -0.000005 | 0.000020  | 0.000074  | 0.000035  |
| 120 | 0.000237  | 0.000019  | 0.000014  | 0.000012  | -0.000010 | -0.000085 | 0.000050  | 0.000073  | 0.000023  | 0.000039  | -0.000006 | -0.000011 |
| 121 | -0.000218 | 0.000001  | -0.000008 | -0.000009 | 0.000023  | 0.000054  | -0.000061 | -0.000075 | 0.000000  | -0.000025 | -0.000001 | 0.000018  |
| 122 | -0.000023 | -0.000020 | -0.000007 | -0.000003 | -0.000012 | 0.000031  | 0.000010  | -0.000005 | -0.000022 | -0.000015 | 0.000007  | -0.000006 |
| 123 | -0.000191 | 0.000044  | -0.000011 | -0.000010 | 0.000021  | 0.000009  | -0.000052 | 0.000088  | -0.000002 | 0.000027  | -0.000002 | -0.000015 |
| 124 | 0.000232  | -0.000026 | 0.000019  | 0.000004  | -0.000038 | 0.000005  | 0.000036  | -0.000002 | 0.000001  | -0.000008 | 0.000015  | 0.000020  |
| 125 | -0.000031 | -0.000018 | -0.000007 | 0.000005  | 0.000015  | -0.000014 | 0.000018  | -0.000076 | -0.000002 | -0.000018 | -0.000012 | -0.000007 |
| 126 | 0.000690  | 0.000149  | 0.000079  | -0.000021 | -0.000098 | -0.000059 | -0.000053 | 0.000388  | -0.000015 | 0.000006  | 0.000079  | -0.000011 |
| 127 | 0.000630  | 0.000059  | 0.000053  | -0.000013 | -0.000076 | -0.000052 | 0.000029  | 0.000497  | -0.000022 | 0.000040  | 0.000047  | -0.000031 |
| 128 | 0.000039  | -0.000004 | -0.000005 | 0.000001  | 0.000003  | -0.000012 | 0.000016  | 0.000015  | 0.000001  | 0.000000  | -0.000004 | -0.000007 |
| 129 | 0.000001  | 0.000028  | 0.000011  | -0.000001 | -0.000008 | 0.000001  | -0.000030 | -0.000032 | 0.000046  | 0.000010  | -0.000003 | 0.000009  |
| 130 | 0.000203  | -0.000053 | 0.000006  | 0.000001  | -0.000031 | -0.000026 | 0.000103  | -0.000021 | -0.000017 | -0.000010 | 0.000003  | 0.000006  |
| 131 | -0.000074 | -0.000001 | -0.000011 | -0.000003 | 0.000018  | 0.000007  | -0.000009 | 0.000058  | -0.000023 | -0.000001 | -0.000003 | -0.000009 |
| 132 | 0.000000  | 0.000004  | 0.000003  | 0.000001  | -0.000001 | -0.000007 | 0.000000  | -0.000008 | 0.000017  | 0.000007  | 0.000000  | -0.000004 |
| 133 | -0.000173 | 0.000027  | -0.000005 | 0.000001  | 0.000020  | 0.000037  | -0.000079 | -0.000011 | -0.000024 | -0.000006 | 0.000007  | 0.000004  |
| 134 | 0.002605  | -0.000150 | -0.000029 | -0.000095 | -0.000050 | 0.000201  | 0.000112  | -0.002130 | -0.000222 | 0.000238  | 0.000143  | -0.000146 |
| 135 | 0.000266  | 0.000088  | -0.000239 | -0.000099 | 0.000133  | 0.000067  | 0.000043  | -0.000799 | -0.000145 | 0.000462  | -0.000132 | -0.000053 |
| 136 | 0.001167  | 0.000148  | -0.000342 | -0.000093 | 0.000144  | 0.000069  | 0.000065  | -0.000086 | 0.000032  | 0.000134  | -0.000172 | 0.000029  |
| 137 | 0.002154  | 0.000045  | -0.000267 | 0.000037  | 0.000041  | -0.000011 | 0.000146  | -0.002431 | 0.000043  | 0.000134  | 0.000024  | -0.000073 |
| 138 | 0.006841  | 0.000208  | -0.000473 | 0.000002  | 0.000007  | -0.000026 | 0.000262  | -0.002704 | -0.000059 | 0.000054  | 0.000105  | -0.000109 |
| 139 | 0.019726  | 0.000960  | -0.001349 | 0.000257  | 0.000129  | -0.000796 | 0.000744  | 0.002376  | 0.000155  | -0.000054 | -0.000098 | -0.000011 |
| 140 | 0.014679  | 0.000508  | -0.000882 | -0.000116 | 0.000202  | -0.000501 | 0.000749  | -0.000719 | 0.000005  | -0.000015 | 0.000111  | -0.000089 |
| 141 | 0.013723  | 0.000989  | -0.000751 | -0.000063 | 0.000141  | -0.000487 | 0.000153  | 0.000616  | -0.000066 | -0.000003 | 0.000132  | -0.000092 |
| 142 | 0.002342  | 0.000830  | -0.000160 | -0.000405 | -0.000186 | 0.000269  | -0.000340 | 0.002216  | -0.000118 | 0.000031  | 0.000107  | -0.000068 |
| 143 | 0.039496  | -0.001173 | -0.000726 | -0.002313 | 0.000690  | 0.002326  | 0.001163  | 0.005360  | 0.000000  | 0.000029  | 0.000040  | -0.000030 |
| 144 | -0.000693 | -0.001084 | 0.001534  | 0.000614  | -0.001117 | -0.000037 | 0.000088  | 0.018179  | 0.000873  | -0.001214 | 0.000112  | 0.000578  |
| 145 | -0.025418 | -0.001093 | -0.001809 | 0.000136  | 0.001171  | -0.000090 | 0.001672  | 0.019092  | 0.000780  | -0.000179 | 0.000592  | -0.000302 |
| 146 | -0.004946 | 0.000138  | 0.000012  | -0.000133 | 0.000320  | 0.000906  | -0.001218 | 0.012085  | 0.000300  | -0.000243 | 0.000342  | -0.000264 |
| 147 | -0.010776 | -0.000320 | 0.001243  | -0.000440 | -0.000215 | 0.001724  | -0.001966 | -0.003175 | -0.000077 | 0.000295  | -0.000429 | -0.000283 |
| 148 | -0.004627 | -0.000557 | 0.000700  | 0.000111  | -0.000315 | 0.000460  | -0.000395 | 0.024717  | 0.001648  | 0.001459  | -0.000241 | -0.001244 |
| 149 | -0.000975 | -0.000147 | -0.000094 | 0.000064  | -0.000013 | 0.000042  | 0.000141  | -0.005257 | -0.001729 | 0.001444  | -0.000561 | -0.000166 |
| 150 | 0.000201  | -0.000461 | 0.000358  | 0.000093  | -0.000238 | 0.000150  | 0.000091  | -0.027019 | 0.000684  | 0.001093  | 0.001930  | -0.000940 |
| 151 | 0.000019  | -0.000183 | 0.000309  | 0.000014  | -0.000176 | 0.000079  | -0.000044 | -0.001075 | -0.000830 | 0.000434  | 0.000625  | -0.000138 |
| 152 | -0.001508 | -0.000142 | 0.000030  | -0.000051 | 0.000002  | 0.000104  | 0.000053  | -0.005841 | -0.001589 | 0.001356  | 0.000122  | -0.000445 |
| 153 | -0.001407 | -0.000103 | -0.000128 | -0.000060 | 0.000068  | 0.000095  | 0.000124  | -0.002441 | -0.000795 | 0.000878  | -0.000109 | -0.000244 |
| 154 | 0.006967  | -0.000005 | 0.000073  | 0.000005  | -0.000209 | -0.000203 | 0.000320  | -0.000855 | -0.000051 | 0.000121  | 0.000051  | -0.000115 |
| 155 | 0.015879  | -0.005402 | -0.001166 | -0.001180 | 0.000655  | 0.001648  | 0.005357  | 0.006287  | 0.000326  | -0.000072 | -0.000168 | 0.000009  |
| 156 | -0.000721 | -0.000466 | 0.000311  | 0.000246  | -0.000232 | 0.000118  | 0.000020  | 0.009937  | 0.004813  | 0.001890  | 0.001183  | -0.001405 |
| 157 | 0.000167  | -0.000281 | -0.000157 | -0.000043 | 0.000002  | 0.000162  | 0.000307  | 0.000447  | -0.000526 | 0.000385  | -0.000038 | -0.000052 |
| 158 | -0.000412 | 0.000007  | -0.000031 | -0.000016 | 0.000035  | 0.000084  | -0.000080 | 0.000914  | -0.000095 | 0.000063  | 0.000014  | -0.000084 |

|     |           |           |           |           |           |           |           |           |           |           |           |           |
|-----|-----------|-----------|-----------|-----------|-----------|-----------|-----------|-----------|-----------|-----------|-----------|-----------|
| 159 | 0.001202  | -0.000105 | 0.000140  | -0.000013 | -0.000200 | 0.000007  | 0.000158  | 0.001863  | -0.000403 | 0.000158  | 0.000167  | -0.000318 |
| 160 | 0.001299  | -0.000071 | 0.000131  | 0.000000  | -0.000195 | -0.000048 | 0.000171  | 0.001327  | -0.000310 | 0.000126  | 0.000135  | -0.000248 |
| 161 | 0.000648  | -0.000122 | 0.000022  | 0.000015  | -0.000082 | -0.000092 | 0.000260  | -0.000640 | -0.000029 | -0.000032 | -0.000025 | 0.000049  |
| 162 | -0.000317 | -0.000072 | 0.000060  | 0.000025  | -0.000013 | 0.000015  | -0.000012 | 0.001086  | 0.000400  | -0.000295 | -0.000127 | 0.000066  |
| 163 | 0.003406  | -0.000350 | 0.000175  | 0.000081  | -0.000356 | -0.000630 | 0.001082  | -0.003962 | 0.000058  | -0.000217 | -0.000110 | 0.000333  |
| 164 | 0.000968  | 0.000165  | -0.000464 | -0.000138 | 0.000223  | 0.000126  | 0.000076  | -0.000539 | -0.000029 | 0.000273  | -0.000261 | 0.000016  |
| 165 | -0.000838 | -0.000087 | 0.000066  | 0.000030  | -0.000011 | -0.000020 | 0.000025  | -0.000423 | 0.000027  | 0.000079  | 0.000023  | -0.000025 |
| 166 | -0.004294 | -0.000190 | 0.000498  | -0.000030 | -0.000081 | -0.000008 | -0.000174 | 0.003368  | -0.000094 | -0.000151 | -0.000016 | 0.000105  |
| 167 | 0.003053  | 0.000133  | 0.000625  | 0.000843  | -0.000579 | -0.001098 | 0.000070  | 0.000403  | -0.000083 | 0.000021  | 0.000215  | -0.000162 |
| 168 | -0.015502 | -0.001520 | 0.001619  | 0.000751  | -0.000625 | -0.000422 | 0.000215  | -0.000576 | 0.000033  | 0.000001  | 0.000004  | 0.000008  |
| 169 | 0.012944  | 0.003176  | -0.003683 | -0.000636 | 0.001515  | -0.000288 | -0.000131 | -0.004238 | 0.000106  | -0.000078 | -0.000167 | 0.000112  |
| 170 | -0.012587 | -0.001443 | 0.001482  | -0.001520 | -0.000001 | 0.002897  | -0.001419 | 0.004947  | 0.000302  | 0.000629  | 0.000986  | -0.000976 |
| 171 | -0.014901 | -0.000062 | 0.000754  | -0.000722 | 0.000212  | 0.001999  | -0.002154 | -0.016090 | 0.000074  | 0.000238  | -0.000408 | 0.000302  |
| 172 | -0.000816 | 0.000129  | -0.001085 | -0.000114 | 0.000697  | -0.000652 | 0.001020  | 0.016466  | -0.000703 | -0.000085 | 0.001860  | -0.000946 |
| 173 | -0.000317 | -0.000309 | 0.000501  | 0.000032  | -0.000276 | 0.000124  | -0.000077 | 0.010819  | 0.001681  | -0.001685 | 0.000520  | 0.000386  |
| 174 | -0.000146 | -0.000121 | -0.000010 | 0.000001  | 0.000004  | 0.000027  | 0.000097  | -0.010840 | -0.001115 | 0.001396  | 0.000462  | -0.000563 |
| 175 | 0.002159  | 0.000216  | -0.000053 | 0.000086  | 0.000007  | -0.000165 | -0.000085 | -0.004728 | 0.001634  | -0.000590 | 0.000396  | 0.000048  |
| 176 | -0.005309 | -0.000968 | 0.000806  | 0.000356  | -0.000400 | 0.000014  | 0.000211  | -0.003607 | -0.000106 | -0.000044 | 0.000401  | -0.000138 |
| 177 | -0.016300 | -0.000626 | 0.001733  | 0.000198  | -0.000576 | 0.000140  | -0.000830 | 0.004186  | -0.000235 | 0.000144  | 0.000027  | -0.000046 |
| 178 | 0.015747  | 0.007736  | -0.006109 | -0.002612 | 0.003212  | 0.001986  | -0.004320 | -0.001617 | -0.000358 | 0.000225  | -0.000200 | 0.000076  |
| 179 | 0.032950  | -0.004682 | 0.002524  | 0.002249  | -0.002133 | -0.003316 | 0.005400  | -0.012674 | 0.000216  | 0.000003  | -0.000682 | 0.000329  |
| 180 | -0.004018 | -0.001146 | 0.000911  | -0.000116 | -0.000381 | 0.000416  | 0.000310  | 0.010919  | -0.002840 | 0.001189  | 0.002395  | -0.001847 |
| 181 | -0.004772 | -0.000216 | -0.000271 | -0.000162 | 0.000257  | 0.000274  | 0.000113  | 0.037326  | 0.004713  | -0.003332 | -0.001424 | 0.001877  |
| 182 | -0.002906 | 0.000424  | -0.000627 | -0.000121 | 0.000421  | -0.000030 | -0.000066 | -0.007252 | 0.000702  | 0.001012  | -0.000394 | -0.000127 |
| 183 | 0.003497  | -0.000207 | -0.000023 | 0.000217  | -0.000147 | -0.000114 | 0.000266  | -0.008196 | -0.000458 | 0.000625  | 0.000369  | -0.000440 |
| 184 | 0.002585  | -0.000235 | 0.000155  | 0.000046  | -0.000302 | -0.000210 | 0.000536  | -0.000150 | -0.000292 | 0.000052  | 0.000112  | -0.000136 |
| 185 | 0.000851  | -0.000012 | 0.000137  | -0.000020 | -0.000153 | 0.000113  | -0.000081 | 0.002283  | -0.000446 | 0.000195  | 0.000231  | -0.000362 |
| 186 | -0.000433 | 0.000097  | -0.000021 | -0.000003 | 0.000063  | 0.000015  | -0.000150 | 0.000224  | 0.000082  | 0.000010  | -0.000020 | 0.000002  |
| 187 | -0.001037 | -0.000077 | -0.000160 | 0.000002  | 0.000152  | -0.000009 | 0.000104  | -0.001808 | 0.000296  | -0.000169 | -0.000193 | 0.000304  |
| 188 | -0.001959 | 0.000227  | -0.000116 | -0.000025 | 0.000242  | 0.000088  | -0.000405 | -0.000593 | 0.000367  | -0.000093 | -0.000133 | 0.000203  |
| 189 | -0.000065 | -0.000005 | 0.000007  | -0.000001 | 0.000003  | 0.000006  | -0.000011 | 0.000051  | -0.000014 | -0.000004 | -0.000001 | -0.000008 |
| 190 | 0.000107  | 0.000013  | 0.000056  | 0.000034  | -0.000009 | 0.000011  | -0.000103 | -0.000257 | 0.000096  | -0.000034 | 0.000018  | 0.000029  |
| 191 | 0.000410  | 0.000121  | 0.000062  | 0.000022  | -0.000031 | -0.000041 | -0.000130 | 0.000275  | 0.000008  | -0.000017 | 0.000010  | 0.000011  |
| 192 | -0.000193 | -0.000134 | 0.000012  | 0.000013  | -0.000017 | 0.000028  | 0.000097  | 0.000230  | -0.000056 | 0.000024  | -0.000010 | -0.000008 |
| 193 | -0.000117 | -0.000092 | -0.000050 | 0.000036  | 0.000021  | -0.000012 | 0.000096  | -0.000206 | -0.000060 | -0.000051 | 0.000023  | 0.000003  |
| 194 | -0.000185 | 0.000051  | -0.000014 | 0.000036  | -0.000018 | 0.000020  | -0.000075 | -0.000312 | 0.000049  | -0.000028 | 0.000043  | 0.000026  |
| 195 | -0.000175 | -0.000190 | -0.000018 | 0.000050  | -0.000024 | 0.000026  | 0.000149  | 0.000092  | -0.000004 | -0.000052 | 0.000004  | 0.000039  |
| 196 | 0.000025  | 0.000003  | 0.000023  | 0.000015  | -0.000019 | -0.000004 | -0.000018 | 0.000008  | 0.000041  | 0.000004  | -0.000007 | 0.000005  |
| 197 | 0.000047  | -0.000023 | -0.000012 | 0.000010  | -0.000016 | 0.000008  | 0.000032  | 0.000010  | -0.000036 | -0.000015 | 0.000016  | 0.000000  |
| 198 | -0.000024 | 0.000002  | -0.000012 | 0.000006  | -0.000001 | -0.000001 | 0.000005  | 0.000015  | -0.000020 | -0.000011 | 0.000010  | 0.000004  |
| 199 | -0.000042 | -0.000022 | -0.000014 | 0.000015  | -0.000008 | 0.000003  | 0.000025  | 0.000034  | -0.000007 | -0.000014 | 0.000016  | 0.000000  |
| 200 | -0.000006 | 0.000000  | 0.000002  | 0.000026  | -0.000012 | -0.000007 | -0.000009 | 0.000020  | 0.000005  | -0.000019 | 0.000000  | 0.000007  |
| 201 | -0.039675 | 0.000582  | 0.001669  | 0.000514  | -0.001897 | -0.002219 | -0.003519 | -0.000298 | -0.000004 | -0.000032 | -0.000011 | 0.000006  |
| 202 | 0.009049  | 0.005180  | -0.004133 | 0.001804  | -0.000714 | -0.002464 | -0.001202 | -0.000118 | -0.000069 | -0.000028 | 0.000056  | -0.000015 |
| 203 | -0.004458 | -0.000363 | 0.001794  | -0.002460 | 0.002725  | 0.001398  | 0.003784  | -0.000153 | -0.000136 | -0.000014 | 0.000034  | -0.000018 |
| 204 | -0.001469 | 0.001460  | -0.004858 | -0.002119 | -0.000342 | 0.003963  | -0.002461 | -0.000001 | -0.000037 | -0.000047 | 0.000000  | 0.000000  |
| 205 | 0.013125  | -0.003865 | -0.001311 | -0.000659 | 0.001010  | -0.002394 | 0.004667  | 0.000140  | 0.000086  | 0.000000  | -0.000024 | -0.000015 |
| 206 | -0.030707 | -0.001187 | 0.002753  | 0.003554  | 0.000646  | -0.001917 | 0.002360  | -0.000018 | 0.000050  | 0.000011  | 0.000039  | -0.000032 |
| 207 | 0.005378  | -0.000982 | 0.000393  | -0.000168 | 0.000321  | -0.000054 | 0.000569  | -0.000044 | 0.000014  | 0.000017  | 0.000006  | -0.000011 |
| 208 | -0.000180 | 0.000963  | -0.000823 | 0.000085  | 0.000283  | -0.000333 | -0.000277 | -0.000101 | -0.000019 | -0.000014 | 0.000018  | -0.000001 |

|     |           |           |           |           |           |           |           |           |           |           |           |           |
|-----|-----------|-----------|-----------|-----------|-----------|-----------|-----------|-----------|-----------|-----------|-----------|-----------|
| 209 | 0.000452  | 0.000002  | -0.000078 | -0.000070 | -0.000199 | 0.000161  | 0.000148  | -0.000067 | 0.000009  | -0.000014 | 0.000013  | 0.000004  |
| 210 | 0.000856  | 0.000151  | 0.000071  | 0.000226  | -0.000298 | -0.000243 | 0.000230  | 0.000031  | 0.000006  | -0.000012 | 0.000007  | -0.000010 |
| 211 | 0.004004  | 0.000330  | -0.000422 | 0.000273  | 0.000117  | 0.000911  | -0.001264 | 0.000140  | 0.000002  | 0.000009  | 0.000012  | -0.000036 |
| 212 | 0.000271  | 0.000229  | 0.000035  | -0.000027 | 0.000002  | -0.000005 | -0.000233 | 0.032562  | -0.002100 | 0.001324  | -0.000955 | -0.002666 |
| 213 | 0.000388  | 0.000089  | 0.000090  | -0.000052 | -0.000023 | -0.000007 | -0.000096 | -0.013766 | -0.004903 | 0.002631  | -0.001494 | 0.001078  |
| 214 | 0.000089  | -0.000026 | 0.000010  | -0.000013 | -0.000013 | 0.000015  | 0.000025  | 0.001028  | 0.002388  | -0.003452 | 0.000417  | 0.001584  |
| 215 | -0.000131 | -0.000061 | -0.000022 | -0.000005 | 0.000012  | 0.000009  | 0.000067  | 0.003296  | -0.003125 | -0.000079 | -0.001572 | 0.002256  |
| 216 | -0.000113 | 0.000022  | -0.000004 | -0.000007 | 0.000029  | 0.000007  | -0.000046 | -0.009046 | 0.001091  | 0.002685  | 0.001340  | -0.001820 |
| 217 | 0.000227  | 0.000088  | 0.000066  | -0.000056 | 0.000018  | 0.000005  | -0.000124 | 0.043346  | 0.002372  | 0.000979  | 0.000962  | -0.001139 |
| 218 | 0.000090  | 0.000034  | 0.000003  | -0.000025 | 0.000000  | 0.000007  | -0.000019 | -0.004366 | 0.000740  | -0.000486 | -0.000031 | -0.000275 |
| 219 | 0.000036  | -0.000018 | 0.000008  | -0.000016 | 0.000000  | 0.000002  | 0.000024  | -0.000884 | -0.000337 | 0.000201  | 0.000379  | -0.000189 |
| 220 | 0.000014  | -0.000015 | 0.000012  | 0.000004  | -0.000017 | -0.000003 | 0.000019  | -0.000429 | -0.000227 | -0.000069 | 0.000231  | 0.000008  |
| 221 | -0.000123 | -0.000033 | 0.000014  | 0.000000  | 0.000009  | 0.000000  | 0.000010  | -0.000672 | 0.000184  | 0.000177  | -0.000244 | 0.000234  |
| 222 | -0.000078 | 0.000049  | 0.000011  | -0.000025 | 0.000033  | 0.000013  | -0.000080 | -0.006281 | -0.000454 | 0.000155  | -0.000380 | 0.000154  |
| 223 | -0.000240 | -0.000064 | -0.000013 | -0.000023 | 0.000000  | 0.000050  | 0.000047  | -0.000200 | 0.000086  | -0.000078 | -0.000034 | 0.000046  |
| 224 | 0.000305  | -0.000142 | 0.000076  | 0.000005  | -0.000062 | 0.000021  | 0.000103  | -0.000249 | 0.000032  | 0.000048  | 0.000018  | -0.000009 |
| 225 | 0.000187  | -0.000076 | 0.000004  | 0.000018  | -0.000038 | 0.000035  | 0.000056  | 0.000049  | -0.000018 | -0.000035 | 0.000041  | 0.000002  |
| 226 | -0.000268 | 0.000016  | 0.000000  | -0.000003 | 0.000010  | -0.000016 | -0.000005 | 0.000042  | 0.000069  | -0.000001 | -0.000029 | 0.000003  |
| 227 | -0.000299 | -0.000009 | 0.000005  | -0.000018 | -0.000006 | 0.000031  | 0.000000  | 0.000276  | 0.000154  | -0.000009 | -0.000043 | 0.000029  |
| 228 | 0.000247  | -0.000022 | 0.000054  | -0.000004 | -0.000034 | 0.000032  | -0.000028 | 0.000043  | 0.000003  | -0.000008 | 0.000007  | -0.000012 |
| 229 | -0.000050 | -0.000023 | -0.000015 | -0.000001 | 0.000002  | 0.000018  | 0.000017  | -0.000002 | 0.000023  | -0.000021 | -0.000008 | 0.000028  |
| 230 | -0.000009 | -0.000042 | 0.000021  | -0.000005 | -0.000019 | 0.000020  | 0.000025  | -0.000107 | -0.000017 | -0.000002 | 0.000009  | 0.000014  |
| 231 | -0.000016 | -0.000021 | 0.000014  | 0.000002  | -0.000015 | 0.000006  | 0.000014  | -0.000028 | -0.000022 | -0.000003 | 0.000019  | -0.000005 |
| 232 | -0.000009 | -0.000039 | 0.000015  | 0.000004  | -0.000016 | 0.000006  | 0.000030  | 0.000043  | -0.000011 | 0.000003  | -0.000002 | -0.000006 |
| 233 | -0.000007 | 0.000024  | -0.000008 | 0.000005  | 0.000001  | 0.000001  | -0.000023 | 0.000100  | 0.000047  | -0.000003 | -0.000012 | 0.000000  |
| 234 | -0.000705 | -0.000172 | -0.000188 | 0.000062  | 0.000002  | 0.000112  | 0.000180  | -0.001110 | -0.000006 | -0.000159 | 0.000100  | 0.000059  |
| 235 | 0.001231  | 0.000196  | 0.000182  | -0.000043 | -0.000091 | -0.000034 | -0.000209 | 0.000964  | 0.000053  | 0.000016  | -0.000023 | 0.000027  |
| 236 | -0.000044 | 0.000115  | 0.000075  | -0.000013 | 0.000022  | -0.000055 | -0.000143 | 0.000295  | 0.000092  | 0.000088  | -0.000053 | -0.000021 |
| 237 | 0.000042  | 0.000043  | 0.000051  | -0.000018 | 0.000009  | -0.000023 | -0.000059 | 0.000357  | -0.000017 | 0.000057  | -0.000032 | -0.000029 |
| 238 | -0.000014 | -0.000072 | -0.000032 | 0.000009  | 0.000001  | 0.000005  | 0.000089  | -0.000157 | -0.000028 | -0.000020 | 0.000013  | -0.000004 |
| 239 | -0.000057 | -0.000049 | -0.000031 | 0.000007  | 0.000015  | 0.000001  | 0.000057  | -0.000142 | -0.000036 | -0.000009 | 0.000004  | -0.000009 |
| 240 | 0.000085  | 0.000005  | 0.000000  | -0.000005 | -0.000014 | 0.000013  | 0.000001  | -0.000011 | -0.000032 | -0.000020 | 0.000011  | 0.000010  |
| 241 | 0.000117  | 0.000021  | 0.000000  | -0.000010 | -0.000011 | 0.000013  | -0.000012 | -0.000028 | -0.000030 | -0.000021 | 0.000014  | 0.000009  |
| 242 | -0.000045 | 0.000039  | 0.000011  | -0.000006 | 0.000006  | -0.000017 | -0.000033 | 0.000224  | 0.000034  | 0.000034  | -0.000018 | -0.000010 |
| 243 | -0.000067 | 0.000025  | 0.000002  | 0.000001  | -0.000005 | -0.000002 | -0.000021 | 0.000173  | 0.000018  | 0.000019  | -0.000002 | -0.000006 |
| 244 | -0.000265 | -0.000070 | -0.000032 | 0.000008  | 0.000028  | -0.000001 | 0.000067  | -0.000270 | 0.000003  | 0.000012  | 0.000002  | -0.000013 |
| 245 | -0.000278 | -0.000083 | -0.000038 | 0.000009  | 0.000038  | -0.000012 | 0.000083  | -0.000295 | -0.000052 | 0.000002  | -0.000015 | -0.000013 |
| 246 | -0.007895 | -0.001810 | -0.001202 | -0.000565 | -0.000401 | -0.000662 | 0.002560  | 0.000418  | 0.000329  | -0.000041 | -0.000080 | 0.000022  |
| 247 | -0.042177 | 0.005278  | 0.003438  | 0.002355  | -0.002257 | -0.006430 | -0.001954 | -0.000744 | -0.000279 | -0.000043 | 0.000143  | -0.000024 |
| 248 | 0.003214  | -0.001879 | 0.000920  | 0.001078  | 0.000197  | 0.000243  | 0.000281  | 0.000026  | -0.000016 | 0.000049  | 0.000005  | -0.000007 |
| 249 | 0.007859  | -0.000172 | 0.001586  | 0.001165  | 0.000084  | 0.001013  | 0.000141  | 0.000004  | -0.000073 | 0.000011  | 0.000019  | -0.000004 |
| 250 | 0.006263  | 0.001979  | -0.002101 | -0.000980 | -0.000093 | 0.000322  | -0.001602 | -0.000041 | -0.000017 | -0.000011 | -0.000014 | 0.000007  |
| 251 | 0.005940  | 0.001568  | -0.001067 | -0.000718 | 0.000140  | 0.000878  | -0.001188 | -0.000025 | -0.000008 | -0.000007 | -0.000021 | 0.000008  |
| 252 | -0.002464 | 0.000831  | -0.000552 | -0.001553 | -0.000109 | 0.000498  | 0.000405  | -0.000009 | -0.000006 | -0.000014 | 0.000009  | 0.000002  |
| 253 | -0.002108 | 0.000491  | -0.000848 | -0.001478 | -0.000203 | 0.000929  | 0.000460  | 0.000004  | -0.000008 | -0.000014 | 0.000008  | 0.000002  |
| 254 | 0.003577  | -0.000887 | 0.000910  | 0.000993  | 0.000578  | -0.000502 | 0.001573  | -0.000021 | -0.000040 | -0.000001 | 0.000019  | -0.000005 |
| 255 | 0.005004  | -0.001361 | 0.000988  | 0.001136  | 0.000106  | -0.001110 | 0.002016  | 0.000027  | -0.000025 | -0.000007 | 0.000026  | -0.000012 |
| 256 | 0.012046  | -0.002140 | -0.001110 | -0.001192 | 0.000705  | 0.002799  | -0.000548 | 0.000203  | 0.000047  | 0.000031  | -0.000050 | -0.000003 |
| 257 | 0.010953  | -0.001656 | -0.001404 | -0.000833 | 0.000585  | 0.002322  | -0.001008 | 0.000151  | 0.000095  | 0.000048  | -0.000065 | 0.000015  |
| 258 | -0.000639 | -0.000059 | -0.000049 | -0.000007 | 0.000075  | 0.000021  | 0.000018  | 0.044853  | 0.001105  | 0.005484  | 0.002667  | -0.002337 |

|     |           |           |           |           |           |           |           |           |           |           |           |           |
|-----|-----------|-----------|-----------|-----------|-----------|-----------|-----------|-----------|-----------|-----------|-----------|-----------|
| 259 | 0.001095  | 0.000163  | 0.000188  | -0.000064 | -0.000068 | -0.000018 | -0.000200 | 0.009065  | -0.002199 | -0.000413 | -0.000386 | 0.001655  |
| 260 | 0.000078  | 0.000088  | 0.000005  | 0.000015  | -0.000024 | -0.000014 | -0.000069 | -0.011220 | 0.001419  | -0.002150 | -0.001050 | 0.000683  |
| 261 | 0.000072  | 0.000018  | 0.000014  | -0.000012 | -0.000014 | 0.000017  | -0.000022 | -0.013757 | -0.000109 | -0.002447 | -0.001246 | 0.000938  |
| 262 | -0.000023 | -0.000039 | -0.000026 | 0.000005  | 0.000006  | -0.000008 | 0.000062  | -0.004515 | -0.001882 | 0.001370  | 0.000082  | -0.000917 |
| 263 | -0.000148 | -0.000028 | -0.000035 | 0.000013  | 0.000011  | -0.000006 | 0.000044  | -0.004007 | -0.001389 | 0.000385  | -0.000210 | -0.000862 |
| 264 | 0.000048  | -0.000031 | 0.000011  | 0.000001  | -0.000013 | 0.000004  | 0.000029  | 0.001536  | -0.000235 | -0.000566 | 0.000463  | 0.001634  |
| 265 | 0.000064  | -0.000020 | 0.000012  | -0.000002 | -0.000012 | 0.000004  | 0.000018  | 0.001954  | -0.000116 | -0.000153 | 0.000324  | 0.001566  |
| 266 | 0.000020  | -0.000015 | 0.000015  | -0.000009 | -0.000002 | 0.000009  | 0.000002  | -0.006465 | 0.000951  | -0.000913 | -0.000165 | 0.000542  |
| 267 | -0.000115 | -0.000037 | 0.000012  | -0.000004 | 0.000013  | 0.000010  | 0.000007  | -0.006610 | 0.001290  | -0.000427 | -0.000001 | 0.000685  |
| 268 | -0.000286 | -0.000033 | -0.000081 | 0.000031  | 0.000023  | -0.000011 | 0.000071  | -0.009716 | 0.000275  | -0.000587 | 0.000134  | -0.001325 |
| 269 | -0.000163 | -0.000005 | -0.000068 | 0.000033  | 0.000005  | -0.000007 | 0.000041  | -0.001297 | -0.000159 | 0.000204  | 0.000145  | -0.001562 |
| 270 | -0.001051 | 0.000168  | 0.000009  | -0.000080 | 0.000062  | 0.000018  | -0.000169 | 0.000537  | 0.000290  | -0.000007 | -0.000146 | 0.000105  |
| 271 | 0.001089  | -0.000335 | 0.000125  | 0.000017  | -0.000141 | 0.000104  | 0.000227  | -0.000858 | -0.000229 | 0.000029  | 0.000125  | -0.000046 |
| 272 | 0.000319  | -0.000069 | -0.000049 | 0.000035  | 0.000002  | -0.000010 | 0.000085  | -0.000045 | -0.000208 | -0.000035 | 0.000037  | -0.000044 |
| 273 | 0.000291  | -0.000058 | -0.000020 | 0.000030  | -0.000010 | -0.000013 | 0.000067  | -0.000044 | -0.000130 | -0.000021 | 0.000046  | -0.000030 |
| 274 | -0.000147 | 0.000072  | 0.000010  | -0.000011 | 0.000011  | -0.000018 | -0.000061 | -0.000071 | 0.000114  | 0.000015  | -0.000017 | 0.000023  |
| 275 | -0.000231 | 0.000101  | -0.000006 | -0.000009 | 0.000026  | -0.000024 | -0.000086 | 0.000047  | 0.000128  | 0.000018  | -0.000028 | 0.000014  |
| 276 | -0.000001 | -0.000046 | 0.000017  | -0.000002 | -0.000016 | 0.000014  | 0.000037  | 0.000014  | 0.000027  | 0.000015  | 0.000004  | 0.000005  |
| 277 | -0.000019 | -0.000046 | 0.000013  | -0.000003 | -0.000013 | 0.000014  | 0.000037  | 0.000000  | 0.000002  | 0.000011  | 0.000006  | 0.000002  |
| 278 | 0.000174  | -0.000049 | -0.000009 | 0.000016  | -0.000010 | 0.000003  | 0.000046  | -0.000032 | -0.000139 | -0.000016 | 0.000025  | -0.000019 |
| 279 | 0.000200  | -0.000056 | 0.000007  | 0.000007  | -0.000019 | 0.000020  | 0.000038  | 0.000024  | -0.000139 | -0.000013 | 0.000020  | -0.000015 |
| 280 | -0.000322 | 0.000150  | -0.000043 | 0.000000  | 0.000046  | -0.000049 | -0.000104 | 0.000210  | 0.000162  | 0.000001  | -0.000036 | 0.000009  |
| 281 | -0.000303 | 0.000167  | -0.000054 | 0.000001  | 0.000064  | -0.000059 | -0.000117 | 0.000221  | 0.000123  | 0.000002  | -0.000034 | -0.000004 |
| 282 | -0.000163 | 0.000463  | -0.000107 | 0.000007  | 0.000050  | -0.000102 | -0.000309 | -0.000267 | 0.000294  | 0.000047  | -0.000046 | 0.000047  |
| 283 | -0.000158 | 0.000078  | -0.000001 | 0.000018  | 0.000002  | -0.000021 | -0.000074 | -0.000010 | 0.000111  | 0.000019  | -0.000011 | 0.000017  |
| 284 | 0.000086  | -0.000004 | 0.000001  | -0.000012 | 0.000001  | 0.000013  | 0.000001  | 0.000035  | -0.000037 | -0.000017 | 0.000006  | -0.000002 |
| 285 | 0.000038  | 0.000040  | 0.000002  | -0.000012 | 0.000007  | -0.000008 | -0.000029 | 0.000020  | 0.000026  | 0.000006  | -0.000007 | 0.000001  |
| 286 | -0.000024 | 0.000003  | 0.000002  | -0.000008 | 0.000004  | -0.000006 | 0.000004  | 0.000018  | -0.000004 | 0.000012  | -0.000001 | -0.000008 |
| 287 | 0.000076  | -0.000066 | -0.000029 | 0.000006  | 0.000006  | 0.000016  | 0.000067  | 0.000095  | -0.000038 | -0.000020 | 0.000007  | -0.000006 |
| 288 | -0.005467 | 0.003242  | 0.066826  | 0.033763  | -0.033949 | -0.066062 | -0.002837 | 0.000360  | -0.000027 | -0.000112 | 0.000021  | -0.000015 |
| 289 | 0.010835  | 0.047820  | 0.024583  | -0.024967 | -0.053214 | 0.006126  | -0.000887 | -0.000158 | -0.000019 | -0.000037 | 0.000007  | 0.000017  |
| 290 | -0.003326 | -0.024301 | 0.024409  | 0.053488  | -0.006994 | 0.007446  | -0.052704 | 0.000072  | 0.000012  | 0.000007  | -0.000001 | -0.000011 |
| 291 | 0.002393  | 0.024898  | 0.051530  | -0.009428 | 0.009282  | -0.051253 | -0.025211 | 0.000002  | -0.000022 | -0.000007 | 0.000003  | -0.000003 |
| 292 | 0.003638  | 0.053517  | -0.007557 | 0.006816  | -0.053565 | -0.024482 | 0.023936  | -0.000006 | -0.000046 | 0.000007  | 0.000000  | 0.000005  |
| 293 | 0.012725  | -0.000065 | 0.005439  | -0.053658 | -0.024806 | 0.025094  | 0.047655  | -0.000171 | 0.000037  | 0.000017  | 0.000016  | 0.000019  |
| 294 | 0.000180  | -0.000183 | 0.000051  | -0.000016 | -0.000016 | 0.000071  | 0.000095  | 0.002164  | 0.002033  | 0.065648  | 0.033519  | -0.033901 |
| 295 | -0.000185 | -0.000033 | 0.000005  | 0.000004  | 0.000011  | 0.000051  | -0.000038 | 0.007845  | 0.048721  | 0.024759  | -0.025031 | -0.053012 |
| 296 | 0.000038  | -0.000030 | -0.000019 | 0.000011  | -0.000011 | -0.000014 | 0.000062  | -0.002616 | -0.023899 | 0.024420  | 0.053377  | -0.007351 |
| 297 | -0.000004 | -0.000031 | 0.000000  | 0.000006  | -0.000004 | -0.000008 | 0.000037  | 0.000927  | 0.024935  | 0.051506  | -0.009259 | 0.008925  |
| 298 | -0.000028 | 0.000035  | 0.000006  | 0.000005  | 0.000008  | -0.000027 | -0.000027 | 0.004196  | 0.053139  | -0.006834 | 0.006291  | -0.053582 |
| 299 | -0.000101 | 0.000086  | -0.000006 | 0.000030  | 0.000017  | -0.000054 | -0.000073 | 0.011190  | 0.001470  | 0.004707  | -0.053769 | -0.024583 |
| 300 | 0.000252  | 0.000244  | -0.000016 | -0.000012 | 0.000024  | -0.000070 | -0.000168 | -0.000010 | 0.000109  | 0.000105  | 0.000016  | -0.000041 |
| 301 | 0.000092  | 0.000008  | 0.000002  | 0.000004  | -0.000001 | -0.000018 | 0.000006  | -0.000161 | -0.000069 | 0.000040  | 0.000021  | -0.000014 |
| 302 | -0.000011 | 0.000008  | -0.000005 | 0.000001  | 0.000005  | -0.000004 | -0.000005 | 0.000084  | 0.000060  | -0.000015 | -0.000011 | 0.000009  |
| 303 | -0.000011 | 0.000008  | -0.000003 | 0.000000  | 0.000005  | 0.000000  | -0.000009 | 0.000015  | 0.000026  | -0.000010 | -0.000011 | 0.000010  |
| 304 | -0.000024 | -0.000053 | -0.000002 | -0.000002 | -0.000004 | 0.000022  | 0.000038  | -0.000017 | 0.000024  | -0.000020 | -0.000003 | 0.000016  |
| 305 | 0.000011  | -0.000077 | -0.000013 | 0.000006  | -0.000007 | 0.000027  | 0.000064  | 0.000017  | -0.000005 | -0.000068 | 0.000004  | 0.000031  |
| 306 | -0.000406 | -0.000103 | 0.000049  | 0.000006  | 0.000016  | -0.000015 | 0.000056  | 0.000418  | 0.000146  | 0.000004  | -0.000024 | 0.000003  |
| 307 | -0.000201 | 0.000224  | -0.000050 | -0.000008 | 0.000021  | -0.000030 | -0.000156 | -0.000025 | 0.000144  | 0.000043  | -0.000039 | 0.000024  |
| 308 | 0.000058  | 0.000065  | -0.000015 | 0.000011  | 0.000011  | -0.000025 | -0.000047 | -0.000048 | 0.000047  | -0.000010 | -0.000003 | 0.000012  |

|     |           |           |           |           |           |           |           |           |           |           |           |           |
|-----|-----------|-----------|-----------|-----------|-----------|-----------|-----------|-----------|-----------|-----------|-----------|-----------|
| 309 | 0.000003  | -0.000010 | 0.000018  | -0.000010 | -0.000008 | 0.000006  | 0.000005  | -0.000037 | -0.000023 | 0.000004  | 0.000011  | -0.000008 |
| 310 | 0.000018  | -0.000002 | -0.000001 | -0.000006 | 0.000003  | 0.000002  | 0.000005  | 0.000015  | -0.000003 | 0.000003  | -0.000008 | 0.000000  |
| 311 | 0.000012  | -0.000051 | -0.000002 | 0.000006  | -0.000008 | 0.000024  | 0.000031  | 0.000053  | -0.000055 | -0.000020 | 0.000005  | 0.000001  |
| 312 | 0.000114  | -0.000222 | 0.000050  | 0.000008  | -0.000019 | 0.000023  | 0.000160  | 0.000043  | -0.000108 | -0.000019 | 0.000034  | -0.000028 |
| 313 | 0.080949  | 0.006409  | -0.002030 | -0.005727 | -0.002245 | 0.000423  | 0.002976  | -0.000505 | 0.000020  | -0.000005 | 0.000049  | 0.000077  |
| 314 | 0.006409  | 0.187275  | -0.103371 | 0.001845  | 0.013836  | -0.001722 | -0.099007 | 0.000085  | -0.000112 | -0.000053 | 0.000022  | -0.000017 |
| 315 | -0.002030 | -0.103371 | 0.197236  | -0.103982 | 0.000428  | 0.012947  | -0.001883 | 0.000015  | 0.000064  | -0.000028 | 0.000000  | 0.000012  |
| 316 | -0.005727 | 0.001845  | -0.103982 | 0.193636  | -0.106047 | 0.000516  | 0.014107  | 0.000082  | -0.000023 | 0.000020  | -0.000010 | -0.000013 |
| 317 | -0.002245 | 0.013836  | 0.000428  | -0.106047 | 0.193402  | -0.104126 | 0.002292  | 0.000071  | -0.000012 | -0.000007 | 0.000003  | -0.000009 |
| 318 | 0.000423  | -0.001722 | 0.012947  | 0.000516  | -0.104126 | 0.196848  | -0.103428 | -0.000086 | 0.000030  | 0.000013  | 0.000001  | 0.000002  |
| 319 | 0.002976  | -0.099007 | -0.001883 | 0.014107  | 0.002292  | -0.103428 | 0.186873  | -0.000168 | 0.000051  | 0.000054  | -0.000015 | 0.000025  |
| 320 | -0.000505 | 0.000085  | 0.000015  | 0.000082  | 0.000071  | -0.000086 | -0.000168 | 0.060995  | 0.007905  | -0.001565 | -0.004191 | -0.002578 |
| 321 | 0.000020  | -0.000112 | 0.000064  | -0.000023 | -0.000012 | 0.000030  | 0.000051  | 0.007905  | 0.187151  | -0.103628 | 0.001588  | 0.013688  |
| 322 | -0.000005 | -0.000053 | -0.000028 | 0.000020  | -0.000007 | 0.000013  | 0.000054  | -0.001565 | -0.103628 | 0.196944  | -0.103819 | 0.000318  |
| 323 | 0.000049  | 0.000022  | 0.000000  | -0.000010 | 0.000003  | 0.000001  | -0.000015 | -0.004191 | 0.001588  | -0.103819 | 0.193453  | -0.105862 |
| 324 | 0.000077  | -0.000017 | 0.000012  | -0.000013 | -0.000009 | 0.000002  | 0.000025  | -0.002578 | 0.013688  | 0.000318  | -0.105862 | 0.193164  |
| 325 | -0.000045 | -0.000026 | -0.000012 | 0.000011  | -0.000009 | -0.000008 | 0.000044  | 0.000249  | -0.001513 | 0.013033  | 0.000685  | -0.104277 |
| 326 | -0.000093 | 0.000187  | -0.000037 | 0.000016  | 0.000033  | -0.000038 | -0.000159 | 0.000043  | -0.098366 | -0.002012 | 0.013760  | 0.003031  |
| 327 | 0.000400  | -0.000235 | 0.000011  | -0.000001 | -0.000033 | 0.000052  | 0.000208  | -0.000622 | -0.000308 | 0.000026  | 0.000029  | 0.000032  |
| 328 | 0.000055  | 0.000007  | -0.000016 | -0.000004 | 0.000017  | -0.000021 | 0.000017  | -0.000152 | -0.000008 | 0.000040  | -0.000006 | -0.000019 |
| 329 | 0.000053  | 0.000088  | -0.000001 | 0.000000  | 0.000005  | -0.000020 | -0.000071 | 0.000078  | 0.000036  | 0.000004  | 0.000012  | 0.000000  |
| 330 | -0.000002 | 0.000007  | 0.000007  | -0.000001 | -0.000005 | -0.000001 | -0.000007 | 0.000003  | 0.000042  | 0.000022  | -0.000009 | -0.000003 |
| 331 | -0.000027 | 0.000000  | -0.000002 | -0.000005 | 0.000007  | 0.000005  | -0.000006 | 0.000034  | -0.000030 | -0.000006 | -0.000006 | -0.000005 |
| 332 | -0.000046 | -0.000027 | -0.000004 | 0.000007  | 0.000001  | -0.000008 | 0.000031  | -0.000009 | 0.000003  | -0.000016 | -0.000001 | 0.000002  |
| 333 | -0.000030 | -0.000077 | 0.000016  | 0.000002  | -0.000025 | 0.000046  | 0.000037  | 0.000046  | -0.000044 | -0.000044 | 0.000010  | 0.000025  |

|    | 325       | 326       | 327       | 328       | 329       | 330       | 331       | 332       | 333       |
|----|-----------|-----------|-----------|-----------|-----------|-----------|-----------|-----------|-----------|
| 1  | 0.000077  | 0.000207  | 0.000111  | 0.000144  | -0.000022 | -0.000076 | -0.000116 | -0.000140 | 0.000204  |
| 2  | -0.000416 | 0.000352  | -0.002323 | 0.000455  | -0.000340 | -0.000054 | 0.000526  | 0.000644  | -0.001216 |
| 3  | 0.000438  | -0.001790 | 0.013455  | 0.003864  | 0.006291  | 0.004398  | -0.004408 | -0.005711 | -0.004623 |
| 4  | -0.000460 | 0.001384  | 0.015909  | -0.000858 | 0.000477  | -0.000140 | -0.000149 | -0.000160 | 0.000834  |
| 5  | -0.003957 | -0.006255 | 0.015149  | 0.000789  | 0.000169  | 0.000040  | -0.000169 | 0.000167  | -0.001002 |
| 6  | 0.004239  | 0.006066  | -0.000510 | -0.004299 | -0.005865 | -0.004336 | 0.004371  | 0.005956  | 0.004382  |
| 7  | 0.000019  | -0.000316 | -0.000174 | -0.000370 | 0.000050  | 0.000039  | -0.000006 | -0.000042 | 0.000330  |
| 8  | 0.000075  | -0.001471 | 0.033605  | 0.002916  | 0.011938  | 0.007731  | -0.007931 | -0.012321 | -0.002682 |
| 9  | -0.000101 | 0.000629  | -0.009183 | 0.000569  | -0.001380 | -0.001109 | 0.001159  | 0.002750  | -0.001925 |
| 10 | 0.000576  | -0.000801 | 0.001992  | -0.000758 | -0.000227 | -0.000006 | 0.000308  | -0.000929 | 0.001610  |
| 11 | -0.001145 | 0.001795  | 0.001549  | 0.000050  | 0.000224  | 0.000053  | -0.000262 | 0.000487  | -0.000552 |
| 12 | 0.002546  | -0.001913 | 0.001804  | -0.000487 | 0.000340  | -0.000150 | 0.000026  | 0.000001  | 0.000275  |
| 13 | -0.009226 | -0.005432 | 0.001454  | 0.001178  | -0.000735 | 0.000367  | -0.000026 | -0.000146 | -0.000649 |
| 14 | 0.007697  | 0.005666  | -0.003725 | -0.001917 | 0.002489  | 0.000936  | -0.000989 | -0.001090 | 0.000548  |
| 15 | -0.000927 | 0.000854  | 0.010421  | -0.002621 | -0.012102 | -0.007514 | 0.007520  | 0.010633  | 0.004414  |
| 16 | -0.000324 | 0.000765  | 0.055770  | 0.001426  | 0.006486  | 0.003387  | -0.004851 | -0.005175 | -0.001416 |
| 17 | 0.000167  | -0.000028 | -0.007751 | -0.003002 | 0.000100  | 0.000330  | 0.000362  | -0.001899 | 0.004110  |
| 18 | -0.000407 | 0.000026  | -0.054471 | 0.000628  | -0.004704 | -0.002799 | 0.003022  | 0.005599  | -0.001615 |
| 19 | 0.000044  | 0.000402  | -0.001466 | 0.000957  | -0.000237 | 0.000126  | -0.000067 | 0.000007  | -0.000788 |
| 20 | -0.000002 | -0.000025 | -0.004664 | -0.000219 | 0.000158  | -0.000009 | 0.000083  | -0.000017 | 0.000002  |
| 21 | 0.000170  | -0.000623 | -0.001293 | 0.000132  | -0.000415 | 0.000076  | 0.000063  | -0.000045 | 0.000189  |
| 22 | 0.004867  | -0.001054 | -0.001253 | 0.000291  | -0.000053 | 0.000045  | 0.000117  | -0.000479 | 0.000070  |

|    |           |           |           |           |           |           |           |           |           |
|----|-----------|-----------|-----------|-----------|-----------|-----------|-----------|-----------|-----------|
| 23 | -0.001655 | 0.003655  | -0.004584 | -0.000031 | -0.000133 | 0.000078  | -0.000011 | 0.000220  | -0.000122 |
| 24 | -0.002723 | -0.003641 | -0.001368 | -0.000507 | 0.000052  | -0.000092 | 0.000122  | -0.000295 | 0.000721  |
| 25 | 0.004367  | 0.001962  | -0.043774 | -0.001284 | 0.004627  | 0.002514  | -0.002652 | -0.003783 | 0.000480  |
| 26 | 0.000182  | -0.002889 | -0.006646 | 0.004397  | -0.002121 | 0.000151  | 0.000402  | 0.000438  | -0.003277 |
| 27 | -0.003290 | 0.000783  | 0.041135  | -0.002834 | -0.003639 | -0.004089 | 0.002994  | 0.005314  | 0.002399  |
| 28 | 0.000546  | -0.000525 | -0.013083 | 0.000293  | -0.000784 | 0.000713  | 0.000357  | -0.001605 | 0.001007  |
| 29 | -0.000669 | 0.000789  | -0.013530 | 0.000459  | 0.000331  | -0.000338 | -0.000107 | 0.001523  | -0.001850 |
| 30 | 0.001453  | -0.001821 | -0.007176 | -0.001152 | 0.000584  | -0.000027 | 0.000182  | -0.000794 | 0.001201  |
| 31 | -0.000896 | 0.000379  | -0.006995 | 0.001194  | -0.000938 | 0.000159  | 0.000006  | 0.000623  | -0.001040 |
| 32 | -0.008983 | 0.006769  | -0.012604 | -0.001808 | 0.001058  | -0.000245 | -0.000287 | 0.000638  | 0.000659  |
| 33 | 0.011452  | -0.009528 | -0.010647 | 0.001537  | -0.001841 | 0.000167  | 0.000762  | -0.000858 | 0.000221  |
| 34 | -0.001259 | 0.000877  | 0.068270  | 0.008293  | -0.010138 | -0.005279 | 0.004478  | 0.013923  | -0.010993 |
| 35 | 0.000387  | 0.000672  | 0.090395  | -0.011569 | 0.014948  | 0.004591  | -0.005817 | -0.010969 | 0.008629  |
| 36 | 0.000017  | 0.000070  | -0.015509 | -0.000849 | -0.001913 | -0.000940 | 0.001282  | -0.000044 | 0.002498  |
| 37 | -0.000008 | -0.000014 | -0.000037 | -0.000185 | 0.000030  | 0.000026  | -0.000055 | -0.000049 | 0.000232  |
| 38 | 0.000037  | 0.000156  | -0.000070 | 0.000155  | 0.000030  | 0.000013  | 0.000004  | -0.000053 | -0.000150 |
| 39 | -0.000009 | 0.000025  | 0.000005  | 0.000042  | 0.000022  | -0.000005 | 0.000000  | -0.000007 | -0.000053 |
| 40 | -0.000058 | 0.000168  | 0.000001  | 0.000000  | 0.000010  | -0.000012 | 0.000016  | -0.000009 | -0.000004 |
| 41 | 0.000798  | 0.001268  | -0.000022 | 0.000030  | -0.000011 | -0.000006 | 0.000018  | -0.000008 | -0.000022 |
| 42 | -0.001444 | -0.000889 | -0.000114 | 0.000196  | -0.000050 | -0.000042 | 0.000008  | 0.000052  | -0.000164 |
| 43 | 0.000033  | -0.000204 | -0.014738 | 0.001966  | 0.000240  | 0.001406  | -0.001093 | -0.001786 | -0.000803 |
| 44 | -0.000078 | 0.000010  | -0.000503 | -0.000023 | -0.000040 | -0.000044 | -0.000001 | 0.000115  | -0.000006 |
| 45 | 0.000041  | -0.000072 | -0.000007 | -0.000087 | -0.000089 | 0.000041  | 0.000012  | -0.000026 | 0.000146  |
| 46 | 0.000027  | 0.002296  | -0.000588 | -0.000096 | 0.000130  | -0.000039 | -0.000012 | -0.000012 | 0.000027  |
| 47 | 0.000009  | -0.000127 | -0.048999 | -0.000028 | 0.003133  | -0.001841 | -0.002945 | 0.000632  | 0.001011  |
| 48 | 0.000277  | -0.000376 | 0.000636  | 0.000054  | -0.000022 | -0.000045 | 0.000006  | -0.000030 | 0.000039  |
| 49 | 0.000108  | -0.000255 | -0.000129 | 0.000097  | 0.000008  | -0.000015 | -0.000017 | 0.000031  | -0.000104 |
| 50 | -0.000148 | -0.000011 | -0.000849 | -0.000013 | -0.000048 | 0.000094  | 0.000023  | 0.000045  | -0.000101 |
| 51 | 0.000098  | -0.000130 | -0.001994 | -0.000885 | 0.000423  | 0.000248  | 0.000002  | -0.000117 | 0.000332  |
| 52 | 0.000102  | 0.000052  | 0.001277  | 0.000136  | 0.000152  | -0.000127 | -0.000076 | -0.000006 | -0.000076 |
| 53 | 0.000353  | -0.000548 | 0.000140  | -0.000011 | -0.000038 | -0.000016 | 0.000012  | 0.000011  | 0.000042  |
| 54 | 0.000028  | -0.000044 | -0.000053 | -0.000011 | -0.000003 | 0.000001  | 0.000004  | -0.000002 | 0.000010  |
| 55 | 0.000064  | -0.000044 | 0.000214  | -0.000101 | 0.000189  | -0.000077 | -0.000054 | 0.000029  | 0.000015  |
| 56 | 0.000006  | -0.000006 | -0.000204 | -0.000143 | 0.000047  | 0.000055  | 0.000005  | 0.000006  | 0.000030  |
| 57 | 0.000006  | 0.000004  | -0.000404 | -0.000124 | 0.000058  | 0.000058  | 0.000003  | -0.000023 | 0.000030  |
| 58 | 0.000004  | -0.000016 | -0.000352 | -0.000144 | 0.000039  | 0.000061  | 0.000003  | -0.000015 | 0.000056  |
| 59 | -0.000003 | 0.000042  | 0.000208  | 0.000115  | -0.000046 | -0.000024 | 0.000002  | 0.000005  | -0.000054 |
| 60 | 0.000056  | 0.000013  | 0.000240  | 0.000054  | -0.000051 | 0.000004  | -0.000001 | -0.000036 | 0.000029  |
| 61 | 0.001735  | -0.001782 | 0.000461  | 0.001090  | -0.000471 | -0.000002 | -0.000263 | 0.000017  | -0.000391 |
| 62 | -0.001530 | 0.001501  | -0.002352 | -0.000586 | 0.000267  | 0.000075  | 0.000230  | -0.000180 | 0.000203  |
| 63 | -0.000436 | 0.000428  | -0.002266 | -0.000213 | 0.000044  | 0.000437  | 0.000121  | 0.000018  | -0.000404 |
| 64 | 0.000767  | -0.000903 | 0.001038  | 0.000434  | -0.000110 | -0.000403 | -0.000126 | -0.000117 | 0.000310  |
| 65 | 0.001364  | -0.001632 | 0.002564  | -0.000219 | 0.000113  | -0.000409 | 0.000004  | -0.000101 | 0.000622  |
| 66 | -0.001233 | 0.001516  | 0.001921  | 0.000084  | -0.000280 | -0.000035 | 0.000119  | 0.000229  | -0.000122 |
| 67 | -0.002651 | 0.002968  | 0.000270  | -0.000619 | 0.000289  | -0.000057 | 0.000152  | 0.000119  | 0.000124  |
| 68 | 0.002005  | -0.002134 | -0.001598 | 0.000121  | 0.000056  | 0.000348  | -0.000195 | 0.000099  | -0.000421 |
| 69 | -0.000055 | 0.000294  | -0.002521 | -0.000977 | 0.001027  | 0.000556  | -0.000488 | -0.001146 | 0.001008  |
| 70 | -0.000540 | 0.000486  | -0.020617 | 0.000017  | -0.000433 | 0.000114  | 0.000222  | -0.000056 | 0.000135  |
| 71 | 0.000282  | -0.000415 | -0.004111 | 0.001192  | -0.001153 | -0.000453 | 0.000502  | 0.000821  | -0.000897 |
| 72 | 0.000265  | -0.000298 | 0.027526  | -0.000290 | 0.000576  | -0.000231 | -0.000229 | 0.000412  | -0.000228 |

|     |           |           |           |           |           |           |           |           |           |
|-----|-----------|-----------|-----------|-----------|-----------|-----------|-----------|-----------|-----------|
| 73  | 0.000634  | -0.001586 | 0.027643  | 0.009573  | 0.005813  | 0.004499  | -0.004482 | -0.004862 | -0.010763 |
| 74  | -0.000187 | 0.000352  | 0.031160  | -0.002306 | 0.004650  | 0.002041  | -0.002841 | -0.003862 | 0.002226  |
| 75  | -0.000206 | 0.000158  | -0.000749 | -0.000910 | 0.001316  | 0.000508  | -0.000589 | -0.000876 | 0.000532  |
| 76  | 0.000049  | -0.000314 | -0.046060 | 0.002014  | -0.006347 | -0.002993 | 0.003902  | 0.005698  | -0.002136 |
| 77  | 0.000020  | 0.000186  | 0.016389  | -0.000868 | 0.000507  | -0.000102 | -0.000272 | -0.000393 | 0.001127  |
| 78  | -0.000054 | -0.000038 | -0.004158 | 0.000175  | -0.000167 | 0.000055  | 0.000067  | 0.000003  | -0.000134 |
| 79  | 0.000049  | -0.000303 | -0.004089 | 0.000025  | -0.000228 | 0.000076  | 0.000093  | -0.000079 | 0.000111  |
| 80  | -0.000629 | 0.001441  | 0.007403  | -0.000258 | 0.000188  | -0.000135 | -0.000046 | 0.000105  | 0.000148  |
| 81  | 0.004655  | -0.001344 | 0.007948  | 0.000268  | 0.000220  | 0.000016  | -0.000142 | -0.000032 | -0.000333 |
| 82  | -0.000520 | 0.000173  | -0.004224 | -0.000006 | -0.000187 | 0.000090  | 0.000071  | -0.000149 | 0.000180  |
| 83  | -0.003130 | 0.001764  | -0.004267 | -0.000213 | -0.000111 | 0.000057  | 0.000057  | -0.000103 | 0.000314  |
| 84  | -0.003568 | -0.011698 | 0.014715  | 0.000871  | 0.000115  | -0.000087 | -0.000176 | 0.000297  | -0.001023 |
| 85  | 0.003777  | 0.010842  | -0.035238 | -0.002159 | 0.005047  | 0.003465  | -0.002860 | -0.005382 | 0.001764  |
| 86  | 0.003051  | -0.001787 | -0.001084 | 0.000667  | -0.001067 | -0.000671 | 0.000550  | 0.001212  | -0.000665 |
| 87  | 0.000751  | -0.000356 | 0.023075  | 0.002058  | -0.003327 | -0.002516 | 0.001942  | 0.003900  | -0.001971 |
| 88  | -0.004304 | 0.001489  | 0.013439  | -0.010545 | -0.004717 | -0.004169 | 0.004365  | 0.005110  | 0.010187  |
| 89  | 0.000110  | 0.000137  | -0.006475 | 0.000597  | 0.000169  | 0.000120  | 0.000043  | 0.000059  | -0.000992 |
| 90  | 0.000274  | -0.000950 | -0.004074 | 0.000030  | 0.000074  | -0.000023 | 0.000008  | 0.000039  | -0.000129 |
| 91  | -0.000806 | -0.000119 | -0.004600 | -0.000666 | -0.000177 | -0.000032 | 0.000161  | 0.000082  | 0.000641  |
| 92  | -0.000079 | 0.001090  | -0.004292 | 0.000888  | -0.001190 | 0.000708  | 0.000528  | -0.001194 | 0.000213  |
| 93  | 0.000102  | -0.000159 | -0.006763 | 0.001394  | -0.001742 | -0.000426 | 0.000985  | 0.000403  | -0.000596 |
| 94  | 0.000085  | -0.000194 | -0.024405 | 0.000913  | -0.002908 | -0.001614 | 0.001857  | 0.003460  | -0.001633 |
| 95  | 0.000110  | -0.000051 | 0.000188  | 0.000399  | -0.000639 | -0.000275 | 0.000272  | 0.000471  | -0.000219 |
| 96  | 0.000098  | -0.000112 | 0.000178  | 0.000490  | -0.000657 | -0.000236 | 0.000321  | 0.000433  | -0.000341 |
| 97  | 0.000044  | 0.000085  | 0.002077  | -0.000043 | 0.000097  | -0.000021 | -0.000039 | -0.000026 | 0.000032  |
| 98  | 0.000008  | -0.000044 | 0.002070  | -0.000135 | 0.000072  | -0.000036 | -0.000026 | 0.000024  | 0.000103  |
| 99  | -0.000005 | 0.000183  | 0.002060  | 0.000036  | 0.000124  | -0.000034 | -0.000046 | 0.000021  | -0.000100 |
| 100 | -0.000039 | 0.000114  | 0.002040  | -0.000059 | 0.000104  | -0.000040 | -0.000047 | 0.000053  | -0.000011 |
| 101 | 0.000247  | -0.000191 | 0.002062  | -0.000015 | 0.000094  | -0.000045 | -0.000038 | 0.000078  | -0.000074 |
| 102 | 0.000304  | -0.000008 | 0.002110  | 0.000022  | 0.000098  | -0.000043 | -0.000035 | 0.000070  | -0.000111 |
| 103 | 0.002598  | -0.000933 | 0.002133  | 0.000130  | 0.000071  | -0.000021 | -0.000033 | 0.000037  | -0.000185 |
| 104 | 0.000531  | -0.000834 | 0.002137  | 0.000083  | 0.000041  | -0.000037 | -0.000024 | 0.000066  | -0.000128 |
| 105 | -0.001259 | 0.001413  | 0.000758  | -0.000427 | 0.000479  | 0.000344  | -0.000253 | -0.000600 | 0.000445  |
| 106 | -0.001799 | 0.000381  | 0.000422  | -0.000232 | 0.000577  | 0.000325  | -0.000291 | -0.000617 | 0.000225  |
| 107 | -0.000370 | 0.000153  | -0.017859 | -0.001049 | 0.002868  | 0.001591  | -0.001464 | -0.002378 | 0.000383  |
| 108 | -0.000387 | 0.000199  | -0.005289 | -0.001019 | 0.000467  | 0.000936  | -0.000478 | -0.001524 | 0.001583  |
| 109 | -0.000188 | 0.000423  | 0.002831  | -0.000366 | 0.000133  | 0.000016  | -0.000111 | -0.000126 | 0.000452  |
| 110 | 0.000076  | -0.000558 | 0.003481  | -0.000252 | -0.000293 | -0.000134 | 0.000069  | 0.000074  | 0.000542  |
| 111 | -0.000336 | 0.000800  | 0.001674  | -0.000062 | 0.000126  | 0.000072  | -0.000068 | -0.000053 | -0.000017 |
| 112 | 0.000062  | 0.000154  | 0.002347  | 0.000034  | -0.000194 | -0.000046 | 0.000057  | 0.000006  | 0.000145  |
| 113 | -0.011427 | 0.021378  | 0.002564  | 0.000072  | 0.000150  | 0.000111  | -0.000120 | -0.000149 | -0.000069 |
| 114 | 0.012212  | -0.021345 | 0.002086  | 0.000589  | 0.000023  | -0.000079 | -0.000038 | 0.000063  | -0.000562 |
| 115 | -0.000066 | -0.000248 | -0.010033 | 0.022783  | -0.013746 | -0.005740 | 0.004986  | 0.014922  | -0.022951 |
| 116 | 0.000138  | -0.000841 | 0.014629  | -0.023454 | 0.014975  | 0.005085  | -0.005580 | -0.013788 | 0.022553  |
| 117 | -0.000485 | 0.000325  | -0.001152 | 0.000264  | -0.000119 | 0.000047  | -0.000039 | 0.000210  | -0.000363 |
| 118 | -0.000108 | -0.000117 | -0.000176 | 0.000212  | -0.000183 | -0.000010 | 0.000009  | 0.000118  | -0.000145 |
| 119 | -0.000104 | -0.000024 | -0.000236 | 0.000229  | -0.000175 | -0.000001 | 0.000024  | 0.000079  | -0.000159 |
| 120 | -0.000011 | -0.000036 | 0.000291  | 0.000075  | -0.000008 | -0.000039 | -0.000023 | 0.000045  | -0.000049 |
| 121 | 0.000018  | -0.000009 | -0.000133 | -0.000026 | 0.000005  | 0.000015  | 0.000011  | -0.000022 | 0.000017  |
| 122 | -0.000005 | 0.000041  | -0.000164 | -0.000051 | 0.000004  | 0.000025  | 0.000012  | -0.000023 | 0.000033  |

|     |           |           |           |           |           |           |           |           |           |
|-----|-----------|-----------|-----------|-----------|-----------|-----------|-----------|-----------|-----------|
| 123 | -0.000009 | 0.000000  | 0.000269  | 0.000149  | -0.000101 | -0.000034 | 0.000011  | 0.000038  | -0.000063 |
| 124 | -0.000021 | -0.000007 | -0.000147 | 0.000046  | 0.000016  | 0.000013  | -0.000010 | -0.000009 | -0.000056 |
| 125 | 0.000026  | 0.000012  | -0.000107 | -0.000189 | 0.000082  | 0.000019  | -0.000001 | -0.000028 | 0.000117  |
| 126 | -0.000177 | 0.000114  | -0.001023 | -0.000248 | 0.000001  | 0.000108  | 0.000031  | 0.000047  | 0.000060  |
| 127 | -0.000151 | 0.000113  | -0.000770 | -0.000090 | 0.000041  | 0.000078  | -0.000003 | 0.000034  | -0.000058 |
| 128 | 0.000005  | 0.000004  | 0.000065  | -0.000016 | 0.000023  | -0.000015 | 0.000003  | -0.000002 | 0.000008  |
| 129 | 0.000000  | -0.000062 | -0.000296 | -0.000167 | 0.000066  | 0.000036  | -0.000007 | -0.000011 | 0.000085  |
| 130 | -0.000005 | 0.000024  | -0.000039 | 0.000030  | 0.000009  | 0.000018  | -0.000007 | -0.000007 | -0.000044 |
| 131 | 0.000011  | 0.000025  | -0.000495 | -0.000151 | 0.000064  | 0.000080  | 0.000012  | -0.000040 | 0.000036  |
| 132 | -0.000006 | -0.000014 | 0.000340  | 0.000139  | -0.000077 | -0.000053 | -0.000001 | 0.000028  | -0.000037 |
| 133 | -0.000004 | 0.000023  | 0.000423  | 0.000164  | -0.000085 | -0.000065 | 0.000001  | 0.000032  | -0.000048 |
| 134 | -0.000098 | 0.000075  | -0.019095 | -0.001798 | 0.001408  | -0.000119 | -0.000128 | 0.001513  | -0.000832 |
| 135 | 0.000302  | -0.000439 | -0.039293 | -0.002093 | -0.002088 | -0.000263 | 0.001972  | 0.001565  | 0.000954  |
| 136 | 0.000238  | -0.000263 | -0.003424 | 0.000337  | -0.000195 | 0.000371  | 0.000142  | 0.000702  | -0.001359 |
| 137 | 0.000063  | -0.000193 | -0.013718 | -0.000746 | 0.000713  | -0.000116 | 0.000167  | 0.001002  | -0.001001 |
| 138 | -0.000045 | 0.000049  | -0.017783 | -0.001489 | 0.000714  | -0.000411 | 0.000394  | 0.001298  | -0.000464 |
| 139 | -0.000020 | 0.000020  | -0.001533 | -0.000085 | -0.000023 | 0.000003  | 0.000000  | 0.000299  | -0.000189 |
| 140 | -0.000183 | 0.000166  | -0.006233 | -0.000655 | 0.000300  | -0.000097 | 0.000120  | 0.000372  | -0.000026 |
| 141 | -0.000283 | 0.000307  | -0.001228 | -0.000348 | 0.000152  | -0.000164 | 0.000093  | 0.000125  | 0.000148  |
| 142 | -0.000249 | 0.000291  | -0.000622 | -0.000105 | 0.000002  | -0.000105 | 0.000035  | 0.000205  | -0.000026 |
| 143 | -0.000345 | 0.000293  | 0.000606  | 0.000003  | -0.000093 | -0.000082 | 0.000023  | 0.000207  | -0.000053 |
| 144 | -0.001157 | 0.000775  | 0.004751  | -0.000086 | -0.000366 | -0.000259 | 0.000237  | 0.000120  | 0.000361  |
| 145 | -0.001562 | 0.000621  | 0.002699  | -0.000106 | -0.000283 | -0.000141 | 0.000094  | 0.000197  | 0.000243  |
| 146 | -0.000861 | 0.000709  | 0.001363  | -0.000021 | -0.000157 | -0.000041 | 0.000053  | 0.000032  | 0.000135  |
| 147 | 0.000081  | 0.000427  | -0.000452 | -0.000029 | -0.000024 | 0.000119  | 0.000002  | -0.000006 | -0.000062 |
| 148 | 0.001143  | -0.002772 | 0.002386  | 0.000068  | -0.000448 | 0.000024  | 0.000204  | -0.000040 | 0.000197  |
| 149 | 0.001315  | -0.000292 | 0.007964  | 0.000162  | -0.000705 | 0.000769  | 0.000212  | -0.001689 | 0.001237  |
| 150 | -0.002398 | -0.000429 | 0.007400  | 0.000141  | -0.000757 | -0.000073 | 0.000478  | -0.000575 | 0.000786  |
| 151 | -0.000742 | 0.000658  | 0.009517  | 0.000791  | -0.001114 | -0.000192 | 0.000557  | -0.000530 | 0.000479  |
| 152 | 0.000360  | 0.000199  | 0.004172  | 0.000601  | -0.000440 | -0.000605 | 0.000061  | 0.000095  | 0.000274  |
| 153 | 0.000764  | -0.000494 | 0.033386  | -0.002051 | -0.000612 | -0.002058 | 0.000947  | 0.001231  | 0.002583  |
| 154 | -0.000102 | 0.000083  | -0.008084 | -0.001039 | 0.000451  | 0.000107  | 0.000065  | 0.000304  | 0.000128  |
| 155 | 0.000025  | -0.000133 | 0.001466  | -0.000067 | -0.000177 | -0.000089 | 0.000088  | 0.000226  | 0.000027  |
| 156 | -0.001283 | -0.005312 | 0.003144  | -0.000320 | -0.000249 | -0.000020 | 0.000178  | -0.000231 | 0.000646  |
| 157 | 0.000241  | -0.000012 | -0.010196 | -0.007229 | -0.001317 | -0.001730 | 0.002238  | 0.001994  | 0.006161  |
| 158 | -0.000253 | 0.000351  | -0.000167 | -0.000095 | 0.000063  | 0.000039  | 0.000002  | -0.000014 | 0.000006  |
| 159 | -0.000664 | 0.001050  | 0.001835  | 0.000700  | -0.000226 | -0.000313 | -0.000072 | 0.000143  | -0.000241 |
| 160 | -0.000505 | 0.000793  | 0.002045  | 0.000759  | -0.000323 | -0.000331 | -0.000052 | 0.000164  | -0.000225 |
| 161 | 0.000181  | -0.000141 | 0.000617  | 0.000319  | -0.000101 | -0.000093 | -0.000009 | 0.000034  | -0.000151 |
| 162 | 0.000012  | -0.000058 | -0.000343 | -0.000031 | 0.000020  | -0.000016 | 0.000035  | 0.000071  | -0.000076 |
| 163 | 0.001029  | -0.001075 | 0.000898  | 0.000558  | -0.000159 | -0.000215 | -0.000102 | 0.000113  | -0.000201 |
| 164 | 0.000401  | -0.000407 | 0.014563  | 0.000224  | -0.000512 | 0.001562  | -0.000889 | -0.002692 | 0.002250  |
| 165 | -0.000008 | -0.000097 | -0.016814 | -0.000314 | -0.000391 | -0.000589 | 0.000836  | 0.001749  | -0.001258 |
| 166 | -0.000097 | 0.000259  | 0.001889  | 0.000497  | -0.001501 | -0.000552 | 0.000776  | 0.000316  | 0.000470  |
| 167 | -0.000415 | 0.000417  | -0.003032 | -0.000580 | 0.000254  | -0.000260 | 0.000155  | 0.000261  | 0.000183  |
| 168 | 0.000021  | -0.000067 | -0.001002 | -0.000068 | 0.000005  | 0.000024  | -0.000003 | 0.000056  | -0.000013 |
| 169 | 0.000468  | -0.000427 | -0.000121 | 0.000215  | 0.000033  | 0.000190  | -0.000059 | -0.000289 | -0.000101 |
| 170 | -0.001381 | 0.000410  | -0.003644 | -0.000492 | 0.000395  | -0.000076 | -0.000028 | -0.000150 | 0.000353  |
| 171 | 0.001200  | -0.001386 | -0.002093 | -0.000163 | 0.000201  | 0.000069  | -0.000076 | -0.000014 | -0.000020 |
| 172 | -0.003930 | 0.003735  | -0.001373 | -0.000197 | 0.000238  | -0.000124 | -0.000085 | -0.000002 | 0.000169  |



|     |           |           |           |           |           |           |           |           |           |
|-----|-----------|-----------|-----------|-----------|-----------|-----------|-----------|-----------|-----------|
| 173 | -0.001860 | 0.000925  | -0.000797 | 0.000037  | -0.000166 | 0.000458  | 0.000157  | -0.000843 | 0.000352  |
| 174 | -0.000168 | -0.000018 | -0.012685 | -0.001169 | 0.001453  | 0.000581  | -0.000599 | -0.000123 | -0.000140 |
| 175 | -0.000633 | -0.000865 | 0.010052  | 0.003454  | -0.002493 | 0.000088  | 0.000662  | -0.000573 | -0.001170 |
| 176 | -0.000457 | 0.000353  | -0.014146 | -0.001534 | 0.000791  | -0.000751 | 0.000627  | 0.000728  | 0.000171  |
| 177 | -0.000102 | 0.000200  | -0.005572 | 0.000088  | 0.000072  | -0.000034 | -0.000071 | 0.000779  | -0.000819 |
| 178 | 0.000548  | -0.000282 | 0.001854  | 0.000828  | -0.000267 | 0.000197  | -0.000178 | 0.000010  | -0.000600 |
| 179 | 0.001336  | -0.001174 | -0.002907 | -0.000252 | 0.000196  | 0.000184  | -0.000002 | -0.000009 | -0.000117 |
| 180 | -0.004651 | 0.005654  | -0.006874 | -0.000333 | 0.000767  | 0.000363  | -0.000390 | 0.000121  | -0.000533 |
| 181 | 0.001579  | -0.003364 | -0.007429 | 0.000123  | 0.001037  | -0.000068 | -0.000475 | -0.000192 | -0.000438 |
| 182 | 0.000753  | -0.001964 | 0.034648  | 0.008504  | -0.005332 | -0.002062 | 0.001843  | 0.002415  | -0.005333 |
| 183 | 0.000001  | -0.000102 | 0.022821  | -0.006005 | 0.003157  | 0.002908  | -0.002094 | -0.005588 | 0.007514  |
| 184 | -0.000135 | 0.000399  | 0.002405  | 0.000908  | -0.000274 | -0.000377 | -0.000063 | 0.000155  | -0.000359 |
| 185 | -0.000890 | 0.001257  | 0.002078  | 0.000738  | -0.000276 | -0.000357 | -0.000078 | 0.000156  | -0.000195 |
| 186 | -0.000032 | -0.000043 | -0.000875 | -0.000390 | 0.000119  | 0.000130  | 0.000023  | -0.000051 | 0.000171  |
| 187 | 0.000735  | -0.000960 | -0.001519 | -0.000488 | 0.000264  | 0.000288  | 0.000050  | -0.000138 | 0.000033  |
| 188 | 0.000340  | -0.000680 | -0.002145 | -0.000782 | 0.000173  | 0.000327  | 0.000070  | -0.000125 | 0.000347  |
| 189 | 0.000012  | 0.000015  | -0.000127 | -0.000032 | 0.000028  | 0.000016  | -0.000016 | -0.000004 | 0.000008  |
| 190 | -0.000064 | -0.000047 | -0.000068 | -0.000165 | -0.000048 | -0.000033 | 0.000021  | 0.000020  | 0.000205  |
| 191 | -0.000013 | -0.000004 | -0.000528 | -0.000134 | -0.000098 | 0.000064  | -0.000006 | 0.000041  | 0.000136  |
| 192 | 0.000011  | 0.000040  | -0.000181 | 0.000032  | 0.000026  | 0.000005  | -0.000017 | 0.000014  | -0.000061 |
| 193 | 0.000007  | 0.000079  | 0.000228  | 0.000061  | -0.000001 | -0.000005 | 0.000009  | -0.000041 | -0.000024 |
| 194 | -0.000087 | -0.000003 | 0.000219  | -0.000089 | -0.000026 | -0.000019 | -0.000005 | -0.000011 | 0.000151  |
| 195 | -0.000017 | 0.000033  | -0.000064 | 0.000129  | 0.000019  | 0.000037  | -0.000056 | -0.000020 | -0.000113 |
| 196 | -0.000001 | -0.000044 | -0.000065 | -0.000003 | 0.000014  | 0.000012  | -0.000011 | 0.000020  | -0.000030 |
| 197 | -0.000011 | 0.000047  | -0.000069 | 0.000011  | -0.000001 | -0.000001 | 0.000010  | 0.000003  | -0.000022 |
| 198 | -0.000010 | 0.000027  | -0.000026 | -0.000021 | -0.000014 | 0.000003  | 0.000004  | 0.000011  | 0.000018  |
| 199 | -0.000016 | 0.000020  | 0.000041  | 0.000022  | -0.000006 | 0.000001  | -0.000008 | 0.000002  | -0.000011 |
| 200 | 0.000005  | 0.000003  | 0.000062  | 0.000012  | 0.000010  | 0.000011  | -0.000029 | -0.000012 | 0.000007  |
| 201 | 0.000020  | 0.000021  | -0.000088 | -0.000130 | -0.000044 | 0.000020  | 0.000025  | -0.000015 | 0.000143  |
| 202 | -0.000045 | 0.000101  | 0.000075  | 0.000098  | -0.000039 | 0.000031  | 0.000001  | -0.000041 | -0.000052 |
| 203 | -0.000020 | 0.000154  | 0.000071  | 0.000086  | 0.000029  | 0.000001  | -0.000003 | -0.000045 | -0.000070 |
| 204 | 0.000043  | 0.000042  | -0.000046 | 0.000064  | 0.000005  | -0.000012 | 0.000016  | 0.000009  | -0.000083 |
| 205 | 0.000026  | -0.000074 | -0.000099 | 0.000005  | -0.000017 | 0.000005  | 0.000039  | -0.000028 | -0.000002 |
| 206 | -0.000085 | 0.000017  | 0.000152  | 0.000017  | -0.000036 | 0.000034  | -0.000017 | -0.000030 | 0.000034  |
| 207 | 0.000008  | -0.000034 | -0.000028 | -0.000010 | 0.000004  | 0.000001  | 0.000007  | -0.000020 | 0.000017  |
| 208 | 0.000006  | 0.000009  | 0.000012  | 0.000025  | -0.000005 | 0.000001  | 0.000012  | -0.000015 | -0.000018 |
| 209 | -0.000004 | -0.000009 | 0.000023  | 0.000006  | -0.000004 | 0.000005  | 0.000001  | -0.000003 | -0.000006 |
| 210 | -0.000001 | 0.000010  | 0.000029  | 0.000044  | -0.000003 | 0.000000  | 0.000013  | -0.000017 | -0.000037 |
| 211 | -0.000018 | 0.000031  | 0.000010  | -0.000006 | 0.000009  | 0.000003  | -0.000007 | -0.000005 | 0.000007  |
| 212 | -0.001633 | 0.002251  | -0.000056 | -0.000020 | -0.000057 | -0.000020 | 0.000029  | -0.000061 | 0.000129  |
| 213 | 0.001657  | 0.003666  | -0.000569 | -0.000030 | 0.000006  | -0.000001 | 0.000011  | 0.000023  | -0.000009 |
| 214 | 0.003805  | -0.002917 | -0.000033 | 0.000119  | -0.000014 | 0.000015  | 0.000002  | -0.000025 | -0.000100 |
| 215 | -0.002559 | 0.000118  | 0.000348  | 0.000014  | 0.000020  | -0.000040 | -0.000008 | -0.000008 | 0.000021  |
| 216 | 0.003993  | -0.004740 | 0.000307  | 0.000018  | -0.000024 | -0.000028 | 0.000041  | -0.000074 | 0.000065  |
| 217 | -0.001802 | 0.000633  | -0.000173 | 0.000050  | -0.000009 | -0.000012 | -0.000001 | 0.000005  | -0.000037 |
| 218 | 0.000328  | -0.000259 | 0.000043  | -0.000008 | -0.000030 | -0.000010 | 0.000027  | -0.000011 | 0.000033  |
| 219 | -0.000016 | -0.000125 | -0.000073 | -0.000011 | -0.000001 | 0.000004  | 0.000018  | -0.000018 | 0.000008  |
| 220 | 0.000065  | 0.000039  | -0.000007 | -0.000021 | 0.000002  | 0.000007  | 0.000002  | -0.000014 | 0.000024  |
| 221 | 0.000535  | -0.000845 | 0.000056  | 0.000005  | 0.000008  | -0.000014 | 0.000006  | -0.000009 | 0.000003  |
| 222 | -0.000417 | 0.000895  | 0.000121  | -0.000026 | -0.000002 | -0.000021 | -0.000006 | 0.000012  | 0.000042  |

|     |           |           |           |           |           |           |           |           |           |
|-----|-----------|-----------|-----------|-----------|-----------|-----------|-----------|-----------|-----------|
| 223 | 0.000004  | -0.000024 | 0.041313  | -0.001395 | 0.001776  | -0.001154 | -0.002383 | -0.001720 | 0.000012  |
| 224 | -0.000042 | -0.000048 | -0.013531 | -0.002064 | 0.002686  | -0.001357 | 0.002364  | 0.000014  | 0.000165  |
| 225 | -0.000065 | 0.000075  | 0.000629  | 0.001899  | -0.005415 | 0.001635  | 0.001713  | 0.003598  | -0.000492 |
| 226 | 0.000028  | -0.000071 | 0.000522  | -0.003014 | -0.001333 | -0.002098 | 0.002601  | -0.002326 | 0.001956  |
| 227 | -0.000010 | -0.000121 | -0.011598 | 0.001936  | 0.001627  | 0.000449  | -0.003296 | 0.004522  | -0.005577 |
| 228 | -0.000046 | 0.000054  | 0.043037  | 0.003590  | 0.002470  | 0.001035  | -0.001014 | 0.000606  | -0.001835 |
| 229 | -0.000008 | -0.000013 | -0.004104 | 0.002233  | -0.001543 | -0.000093 | -0.000206 | 0.000393  | -0.000733 |
| 230 | -0.000011 | 0.000008  | -0.000233 | -0.000653 | 0.000883  | -0.000201 | -0.000397 | 0.000123  | 0.000151  |
| 231 | -0.000014 | 0.000024  | -0.000089 | 0.000208  | -0.000075 | -0.000170 | 0.000387  | 0.000052  | -0.000394 |
| 232 | -0.000005 | 0.000020  | -0.000298 | 0.000223  | 0.000230  | -0.000356 | 0.000010  | 0.000766  | -0.000781 |
| 233 | -0.000006 | -0.000026 | -0.007919 | -0.000327 | 0.000069  | -0.000479 | 0.000327  | 0.000015  | 0.000351  |
| 234 | -0.000123 | 0.000140  | 0.001284  | 0.000224  | 0.000007  | -0.000048 | 0.000024  | -0.000142 | -0.000069 |
| 235 | -0.000021 | -0.000064 | -0.001612 | -0.000276 | -0.000154 | 0.000107  | -0.000031 | 0.000153  | 0.000204  |
| 236 | 0.000036  | -0.000146 | -0.000138 | -0.000117 | 0.000023  | -0.000005 | -0.000021 | 0.000064  | 0.000057  |
| 237 | 0.000053  | -0.000035 | -0.000233 | 0.000000  | 0.000011  | 0.000024  | -0.000012 | 0.000003  | -0.000025 |
| 238 | -0.000002 | 0.000042  | 0.000062  | 0.000032  | 0.000009  | -0.000017 | 0.000021  | -0.000010 | -0.000035 |
| 239 | 0.000017  | 0.000035  | 0.000130  | 0.000035  | 0.000019  | -0.000025 | 0.000022  | -0.000021 | -0.000031 |
| 240 | -0.000010 | 0.000041  | -0.000066 | -0.000007 | -0.000025 | 0.000014  | 0.000004  | -0.000001 | 0.000015  |
| 241 | -0.000013 | 0.000040  | -0.000041 | -0.000017 | -0.000025 | 0.000017  | 0.000000  | -0.000001 | 0.000026  |
| 242 | 0.000013  | -0.000055 | -0.000078 | 0.000005  | 0.000004  | 0.000010  | -0.000014 | 0.000018  | -0.000022 |
| 243 | -0.000006 | -0.000025 | -0.000007 | 0.000016  | 0.000001  | 0.000014  | -0.000022 | 0.000005  | -0.000013 |
| 244 | 0.000012  | -0.000013 | 0.000398  | 0.000050  | 0.000063  | -0.000044 | 0.000008  | -0.000025 | -0.000052 |
| 245 | 0.000043  | 0.000039  | 0.000299  | 0.000055  | 0.000069  | -0.000045 | 0.000020  | -0.000044 | -0.000056 |
| 246 | 0.000138  | -0.000367 | -0.000270 | -0.000076 | -0.000058 | 0.000012  | 0.000082  | -0.000006 | 0.000051  |
| 247 | -0.000159 | 0.000362  | 0.000264  | 0.000133  | -0.000085 | 0.000079  | -0.000025 | -0.000115 | 0.000006  |
| 248 | -0.000057 | 0.000025  | 0.000087  | -0.000071 | 0.000034  | -0.000012 | -0.000042 | 0.000031  | 0.000058  |
| 249 | -0.000056 | 0.000102  | 0.000064  | 0.000001  | 0.000025  | -0.000011 | -0.000024 | 0.000013  | -0.000007 |
| 250 | 0.000046  | -0.000011 | -0.000050 | 0.000000  | -0.000004 | -0.000005 | 0.000011  | 0.000007  | -0.000009 |
| 251 | 0.000050  | -0.000021 | -0.000038 | 0.000005  | 0.000018  | -0.000016 | 0.000008  | 0.000013  | -0.000027 |
| 252 | 0.000006  | 0.000002  | -0.000010 | 0.000051  | -0.000007 | 0.000009  | 0.000007  | -0.000018 | -0.000042 |
| 253 | 0.000009  | 0.000004  | -0.000012 | 0.000045  | -0.000010 | 0.000009  | 0.000008  | -0.000017 | -0.000036 |
| 254 | -0.000034 | 0.000060  | 0.000053  | 0.000014  | 0.000013  | -0.000001 | -0.000011 | -0.000006 | -0.000010 |
| 255 | -0.000042 | 0.000059  | 0.000041  | 0.000028  | -0.000004 | 0.000003  | 0.000001  | -0.000019 | -0.000011 |
| 256 | 0.000059  | -0.000084 | -0.000079 | -0.000023 | 0.000039  | -0.000035 | 0.000006  | 0.000039  | -0.000025 |
| 257 | 0.000040  | -0.000133 | -0.000045 | -0.000108 | 0.000037  | -0.000031 | -0.000022 | 0.000077  | 0.000051  |
| 258 | -0.003279 | -0.003522 | 0.000978  | -0.000129 | -0.000015 | -0.000079 | 0.000099  | -0.000149 | 0.000270  |
| 259 | 0.002258  | 0.000995  | -0.001854 | 0.000163  | 0.000020  | 0.000081  | -0.000003 | 0.000039  | -0.000300 |
| 260 | 0.001487  | 0.001159  | -0.000102 | -0.000032 | -0.000021 | 0.000024  | -0.000047 | 0.000059  | 0.000018  |
| 261 | 0.001122  | 0.001733  | -0.000097 | 0.000027  | -0.000008 | 0.000018  | -0.000026 | 0.000043  | -0.000054 |
| 262 | -0.000830 | 0.001376  | 0.000118  | -0.000029 | 0.000011  | -0.000011 | 0.000009  | -0.000004 | 0.000025  |
| 263 | -0.000996 | 0.000844  | 0.000228  | -0.000014 | 0.000010  | -0.000020 | -0.000002 | -0.000001 | 0.000028  |
| 264 | 0.000421  | -0.000860 | -0.000143 | 0.000021  | 0.000005  | 0.000007  | 0.000014  | -0.000018 | -0.000029 |
| 265 | 0.000078  | -0.001121 | -0.000107 | 0.000017  | -0.000002 | 0.000009  | 0.000015  | -0.000021 | -0.000018 |
| 266 | 0.001260  | -0.002047 | -0.000031 | 0.000039  | 0.000013  | 0.000006  | -0.000015 | 0.000017  | -0.000060 |
| 267 | 0.002293  | -0.002394 | -0.000053 | 0.000028  | 0.000009  | 0.000008  | -0.000007 | 0.000006  | -0.000044 |
| 268 | -0.001679 | 0.000366  | 0.000554  | -0.000025 | -0.000012 | -0.000024 | -0.000012 | 0.000008  | 0.000064  |
| 269 | -0.001780 | 0.002949  | 0.000513  | -0.000065 | -0.000010 | -0.000021 | -0.000025 | 0.000022  | 0.000099  |
| 270 | 0.000062  | -0.000307 | 0.040076  | 0.002668  | 0.005935  | 0.003154  | -0.003589 | -0.004226 | -0.004390 |
| 271 | -0.000114 | 0.000236  | 0.019186  | -0.004680 | 0.000731  | -0.001267 | 0.001944  | 0.002291  | 0.002199  |
| 272 | 0.000013  | 0.000238  | -0.007442 | -0.000070 | -0.002052 | -0.000998 | 0.001061  | 0.001664  | 0.002099  |

|     |           |           |           |           |           |           |           |           |           |
|-----|-----------|-----------|-----------|-----------|-----------|-----------|-----------|-----------|-----------|
| 273 | -0.000016 | 0.000152  | -0.010379 | 0.000644  | -0.002733 | -0.000968 | 0.001481  | 0.000957  | 0.001902  |
| 274 | 0.000006  | -0.000141 | -0.007807 | -0.000905 | 0.001331  | -0.000013 | -0.000640 | -0.001126 | 0.000097  |
| 275 | 0.000009  | -0.000142 | -0.006703 | -0.000087 | 0.000383  | -0.000069 | -0.000447 | -0.001230 | -0.000454 |
| 276 | -0.000012 | -0.000039 | 0.001424  | -0.000360 | -0.000980 | 0.000469  | 0.001528  | -0.000200 | -0.000430 |
| 277 | -0.000004 | -0.000016 | 0.001615  | -0.000788 | -0.000565 | 0.000973  | 0.001290  | -0.000442 | -0.000255 |
| 278 | 0.000000  | 0.000149  | -0.005651 | -0.000543 | -0.001473 | -0.000510 | 0.000405  | 0.000957  | 0.001195  |
| 279 | -0.000014 | 0.000162  | -0.005098 | -0.000024 | -0.000759 | -0.000298 | 0.000243  | 0.002675  | 0.000559  |
| 280 | 0.000026  | -0.000163 | -0.013635 | 0.001851  | -0.000347 | 0.000021  | -0.001330 | -0.000621 | -0.002831 |
| 281 | 0.000043  | -0.000130 | -0.005835 | 0.001226  | 0.000421  | 0.000178  | -0.001252 | -0.000557 | 0.000003  |
| 282 | 0.000049  | -0.000393 | 0.000646  | -0.000058 | -0.000140 | -0.000127 | 0.000114  | 0.000056  | 0.000160  |
| 283 | -0.000011 | -0.000126 | -0.000096 | 0.000012  | -0.000038 | -0.000034 | 0.000054  | 0.000059  | -0.000050 |
| 284 | -0.000002 | 0.000052  | 0.000029  | -0.000005 | -0.000005 | 0.000025  | -0.000026 | -0.000026 | 0.000036  |
| 285 | 0.000001  | -0.000027 | 0.000023  | -0.000044 | -0.000001 | 0.000006  | -0.000016 | 0.000000  | 0.000055  |
| 286 | 0.000000  | 0.000001  | 0.000006  | -0.000045 | 0.000013  | 0.000022  | -0.000019 | -0.000011 | 0.000040  |
| 287 | 0.000000  | 0.000058  | -0.000181 | 0.000024  | 0.000009  | 0.000052  | -0.000006 | -0.000040 | -0.000039 |
| 288 | -0.000065 | 0.000198  | -0.000366 | -0.000069 | 0.000135  | 0.000027  | -0.000022 | -0.000012 | -0.000059 |
| 289 | 0.000034  | 0.000001  | -0.000043 | 0.000014  | 0.000051  | 0.000006  | -0.000005 | -0.000026 | -0.000041 |
| 290 | -0.000010 | 0.000002  | 0.000054  | -0.000005 | -0.000028 | 0.000000  | 0.000007  | -0.000003 | 0.000030  |
| 291 | -0.000004 | 0.000032  | -0.000016 | 0.000026  | -0.000002 | -0.000001 | 0.000007  | -0.000008 | -0.000023 |
| 292 | 0.000001  | 0.000033  | 0.000006  | 0.000022  | -0.000007 | 0.000000  | -0.000002 | 0.000005  | -0.000018 |
| 293 | -0.000014 | -0.000074 | 0.000105  | -0.000024 | -0.000052 | 0.000004  | 0.000001  | 0.000010  | 0.000061  |
| 294 | -0.065978 | -0.003214 | -0.000355 | -0.000024 | 0.000064  | 0.000120  | -0.000073 | -0.000038 | -0.000052 |
| 295 | 0.007374  | -0.002870 | -0.000238 | -0.000027 | 0.000041  | 0.000040  | -0.000013 | -0.000011 | -0.000029 |
| 296 | 0.007810  | -0.053033 | 0.000106  | 0.000064  | -0.000007 | -0.000018 | 0.000002  | 0.000005  | -0.000047 |
| 297 | -0.051382 | -0.024529 | -0.000005 | 0.000025  | 0.000000  | -0.000010 | 0.000004  | 0.000002  | -0.000020 |
| 298 | -0.024577 | 0.024171  | -0.000030 | 0.000009  | -0.000018 | -0.000012 | 0.000015  | 0.000001  | 0.000005  |
| 299 | 0.024811  | 0.046596  | 0.000028  | -0.000005 | -0.000061 | -0.000018 | 0.000034  | 0.000020  | 0.000031  |
| 300 | 0.000047  | -0.000235 | 0.003983  | 0.000494  | 0.067640  | 0.035665  | -0.035022 | -0.069065 | -0.001119 |
| 301 | 0.000027  | -0.000005 | 0.015802  | 0.046044  | 0.024925  | -0.024482 | -0.053411 | 0.004164  | 0.002544  |
| 302 | -0.000012 | -0.000032 | -0.005393 | -0.023312 | 0.024223  | 0.053040  | -0.006153 | 0.007611  | -0.053946 |
| 303 | -0.000003 | -0.000014 | -0.000104 | 0.024924  | 0.051505  | -0.009883 | 0.009429  | -0.050437 | -0.025308 |
| 304 | -0.000016 | 0.000000  | 0.002831  | 0.053001  | -0.007882 | 0.007058  | -0.053623 | -0.024315 | 0.024386  |
| 305 | -0.000007 | 0.000044  | 0.014537  | 0.000628  | 0.005985  | -0.053754 | -0.024236 | 0.024185  | 0.046790  |
| 306 | 0.000019  | -0.000150 | -0.000695 | 0.000065  | -0.000033 | 0.000021  | 0.000139  | -0.000054 | -0.000134 |
| 307 | 0.000021  | -0.000193 | 0.000306  | -0.000046 | -0.000013 | -0.000077 | 0.000032  | 0.000033  | 0.000073  |
| 308 | 0.000002  | -0.000048 | 0.000011  | -0.000007 | -0.000055 | 0.000003  | 0.000021  | 0.000003  | 0.000035  |
| 309 | -0.000002 | 0.000019  | 0.000038  | -0.000004 | 0.000005  | -0.000002 | -0.000005 | 0.000000  | 0.000006  |
| 310 | 0.000008  | 0.000001  | 0.000106  | -0.000009 | 0.000021  | -0.000011 | -0.000019 | 0.000003  | 0.000015  |
| 311 | -0.000008 | 0.000077  | -0.000126 | 0.000035  | 0.000010  | 0.000015  | -0.000005 | -0.000028 | -0.000027 |
| 312 | -0.000020 | 0.000142  | -0.000335 | 0.000030  | 0.000032  | 0.000071  | -0.000024 | -0.000010 | -0.000100 |
| 313 | -0.000045 | -0.000093 | 0.000400  | 0.000055  | 0.000053  | -0.000002 | -0.000027 | -0.000046 | -0.000030 |
| 314 | -0.000026 | 0.000187  | -0.000235 | 0.000007  | 0.000088  | 0.000007  | 0.000000  | -0.000027 | -0.000077 |
| 315 | -0.000012 | -0.000037 | 0.000011  | -0.000016 | -0.000001 | 0.000007  | -0.000002 | -0.000004 | 0.000016  |
| 316 | 0.000011  | 0.000016  | -0.000001 | -0.000004 | 0.000000  | -0.000001 | -0.000005 | 0.000007  | 0.000002  |
| 317 | -0.000009 | 0.000033  | -0.000033 | 0.000017  | 0.000005  | -0.000005 | 0.000007  | 0.000001  | -0.000025 |
| 318 | -0.000008 | -0.000038 | 0.000052  | -0.000021 | -0.000020 | -0.000001 | 0.000005  | -0.000008 | 0.000046  |
| 319 | 0.000044  | -0.000159 | 0.000208  | 0.000017  | -0.000071 | -0.000007 | -0.000006 | 0.000031  | 0.000037  |
| 320 | 0.000249  | 0.000043  | -0.000622 | -0.000152 | 0.000078  | 0.000003  | 0.000034  | -0.000009 | 0.000046  |
| 321 | -0.001513 | -0.098366 | -0.000308 | -0.000008 | 0.000036  | 0.000042  | -0.000030 | 0.000003  | -0.000044 |
| 322 | 0.013033  | -0.002012 | 0.000026  | 0.000040  | 0.000004  | 0.000022  | -0.000006 | -0.000016 | -0.000044 |

|     |           |           |           |           |           |           |           |           |           |
|-----|-----------|-----------|-----------|-----------|-----------|-----------|-----------|-----------|-----------|
| 323 | 0.000685  | 0.013760  | 0.000029  | -0.000006 | 0.000012  | -0.000009 | -0.000006 | -0.000001 | 0.000010  |
| 324 | -0.104277 | 0.003031  | 0.000032  | -0.000019 | 0.000000  | -0.000003 | -0.000005 | 0.000002  | 0.000025  |
| 325 | 0.196334  | -0.102718 | 0.000049  | 0.000062  | -0.000011 | -0.000014 | 0.000009  | 0.000012  | -0.000059 |
| 326 | -0.102718 | 0.185212  | 0.000170  | -0.000068 | -0.000041 | -0.000038 | 0.000038  | 0.000000  | 0.000111  |
| 327 | 0.000049  | 0.000170  | 0.115641  | 0.004310  | -0.000988 | -0.004193 | -0.002983 | -0.006858 | 0.010531  |
| 328 | 0.000062  | -0.000068 | 0.004310  | 0.184557  | -0.103663 | 0.002942  | 0.013324  | -0.001204 | -0.097028 |
| 329 | -0.000011 | -0.000041 | -0.000988 | -0.103663 | 0.197525  | -0.104191 | 0.000794  | 0.012277  | -0.001692 |
| 330 | -0.000014 | -0.000038 | -0.004193 | 0.002942  | -0.104191 | 0.193195  | -0.105659 | -0.000174 | 0.013564  |
| 331 | 0.000009  | 0.000038  | -0.002983 | 0.013324  | 0.000794  | -0.105659 | 0.192296  | -0.102549 | 0.001842  |
| 332 | 0.000012  | 0.000000  | -0.006858 | -0.001204 | 0.012277  | -0.000174 | -0.102549 | 0.197315  | -0.104101 |
| 333 | -0.000059 | 0.000111  | 0.010531  | -0.097028 | -0.001692 | 0.013564  | 0.001842  | -0.104101 | 0.186219  |
